# Supplementary material for: Genome size and identification of abundant repetitive sequences in Vallisneria spinulosa
Source: PubMed Central journal article supplement (PMC5669256; doi:10.7717/peerj.3982), 2017-10-31
Supplement: peerj-05-3982-s001.pdf [file peerj-05-3982-s001.pdf]

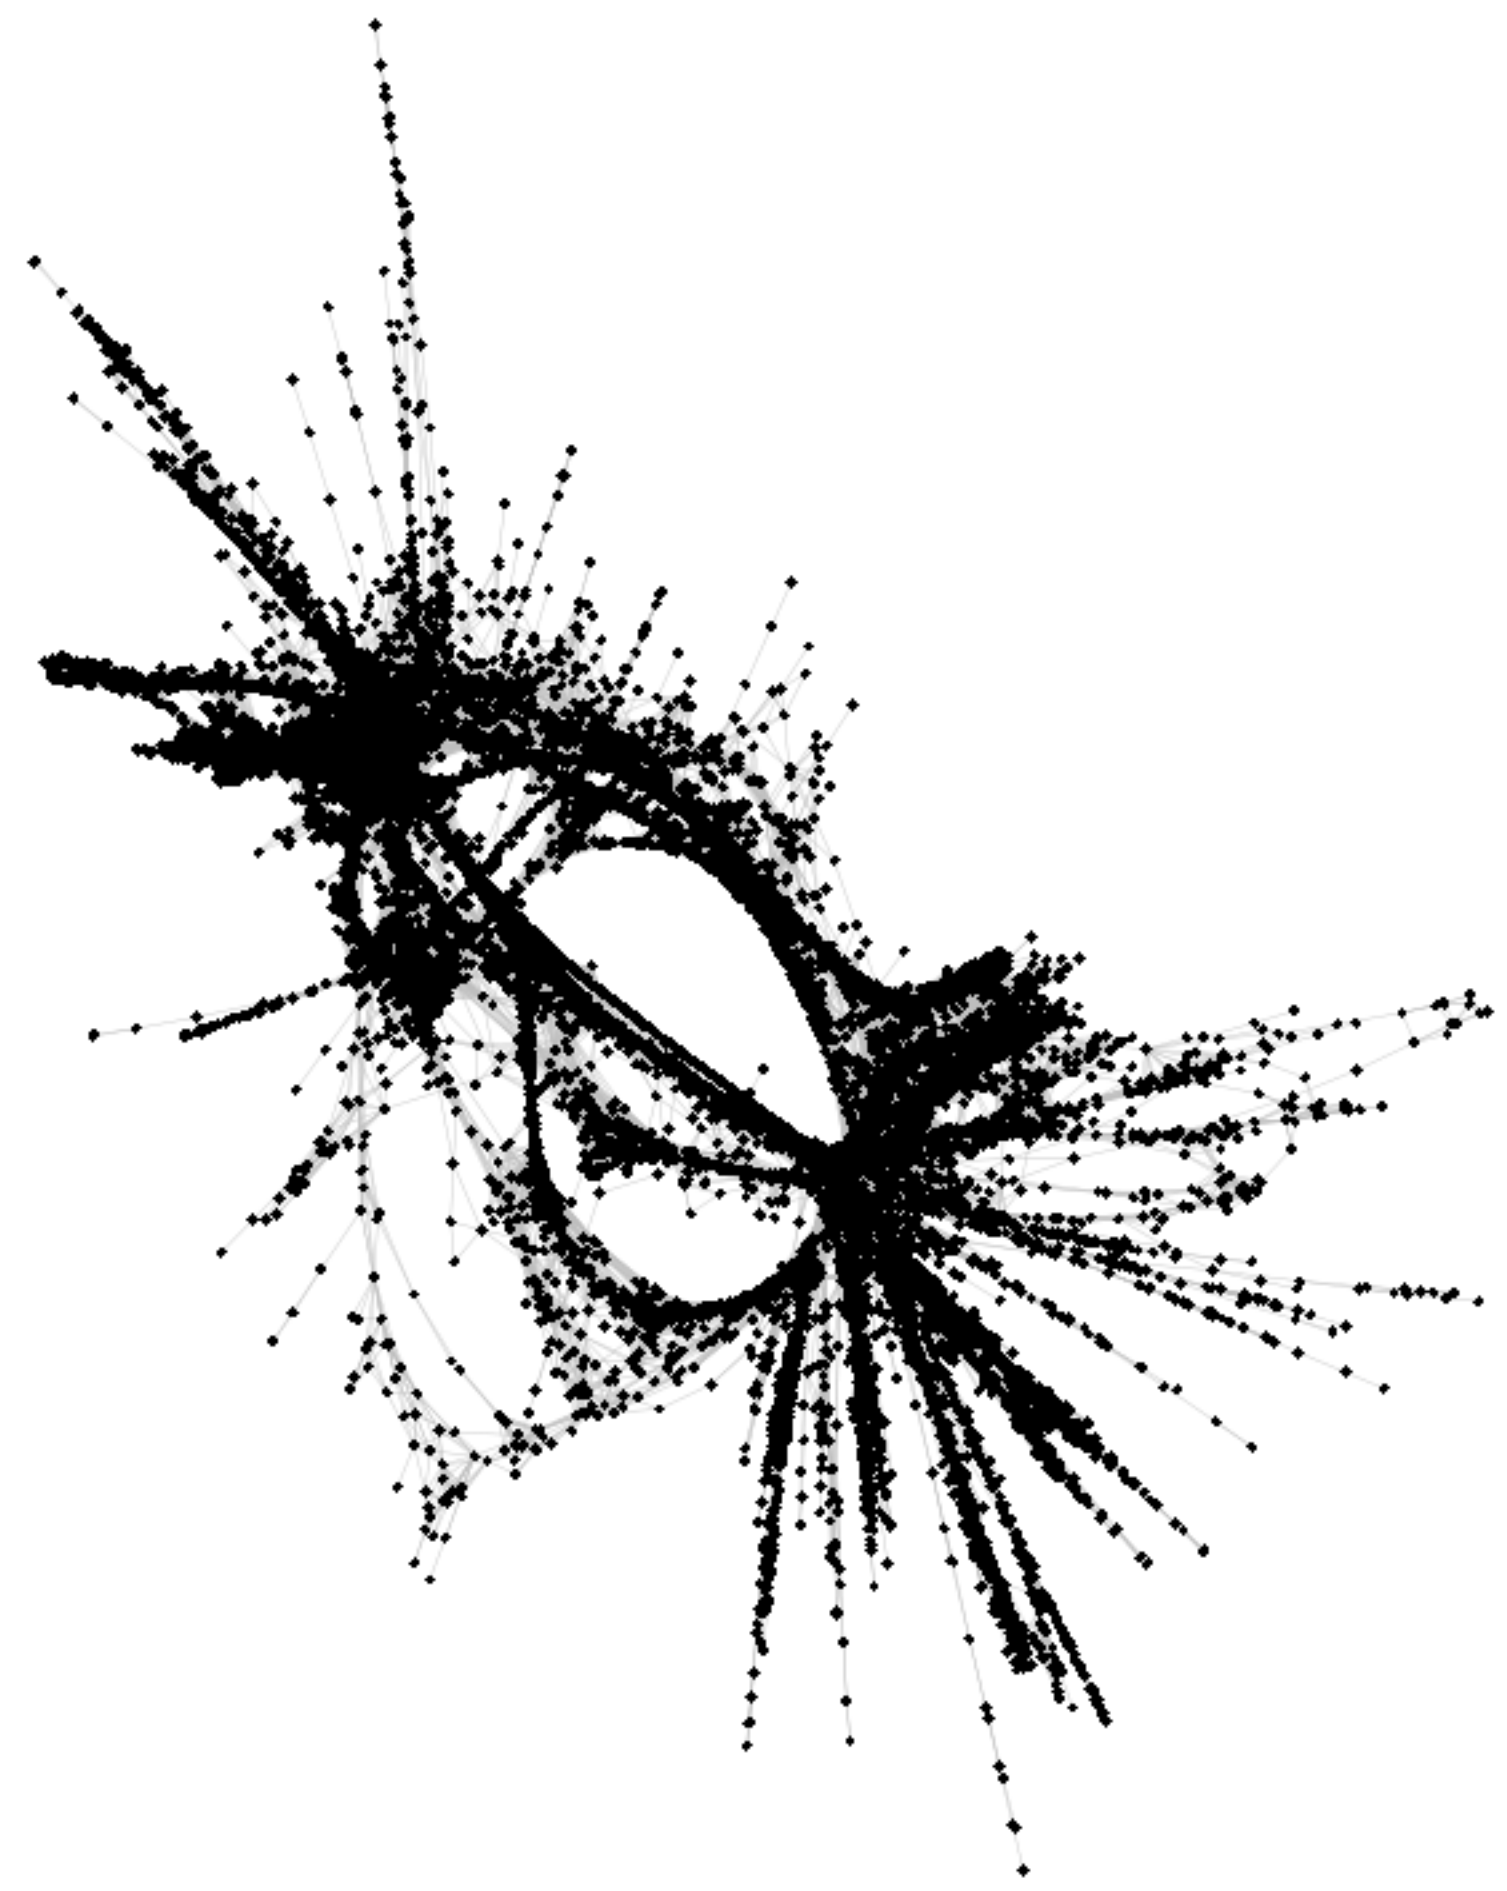

**CL1**

Number of reads: 20732  
Number of pairs: 1126241  
Density: 0.005241  
Diameter: NA  
Mean edge weight: 156.78  
Max. degree: 829

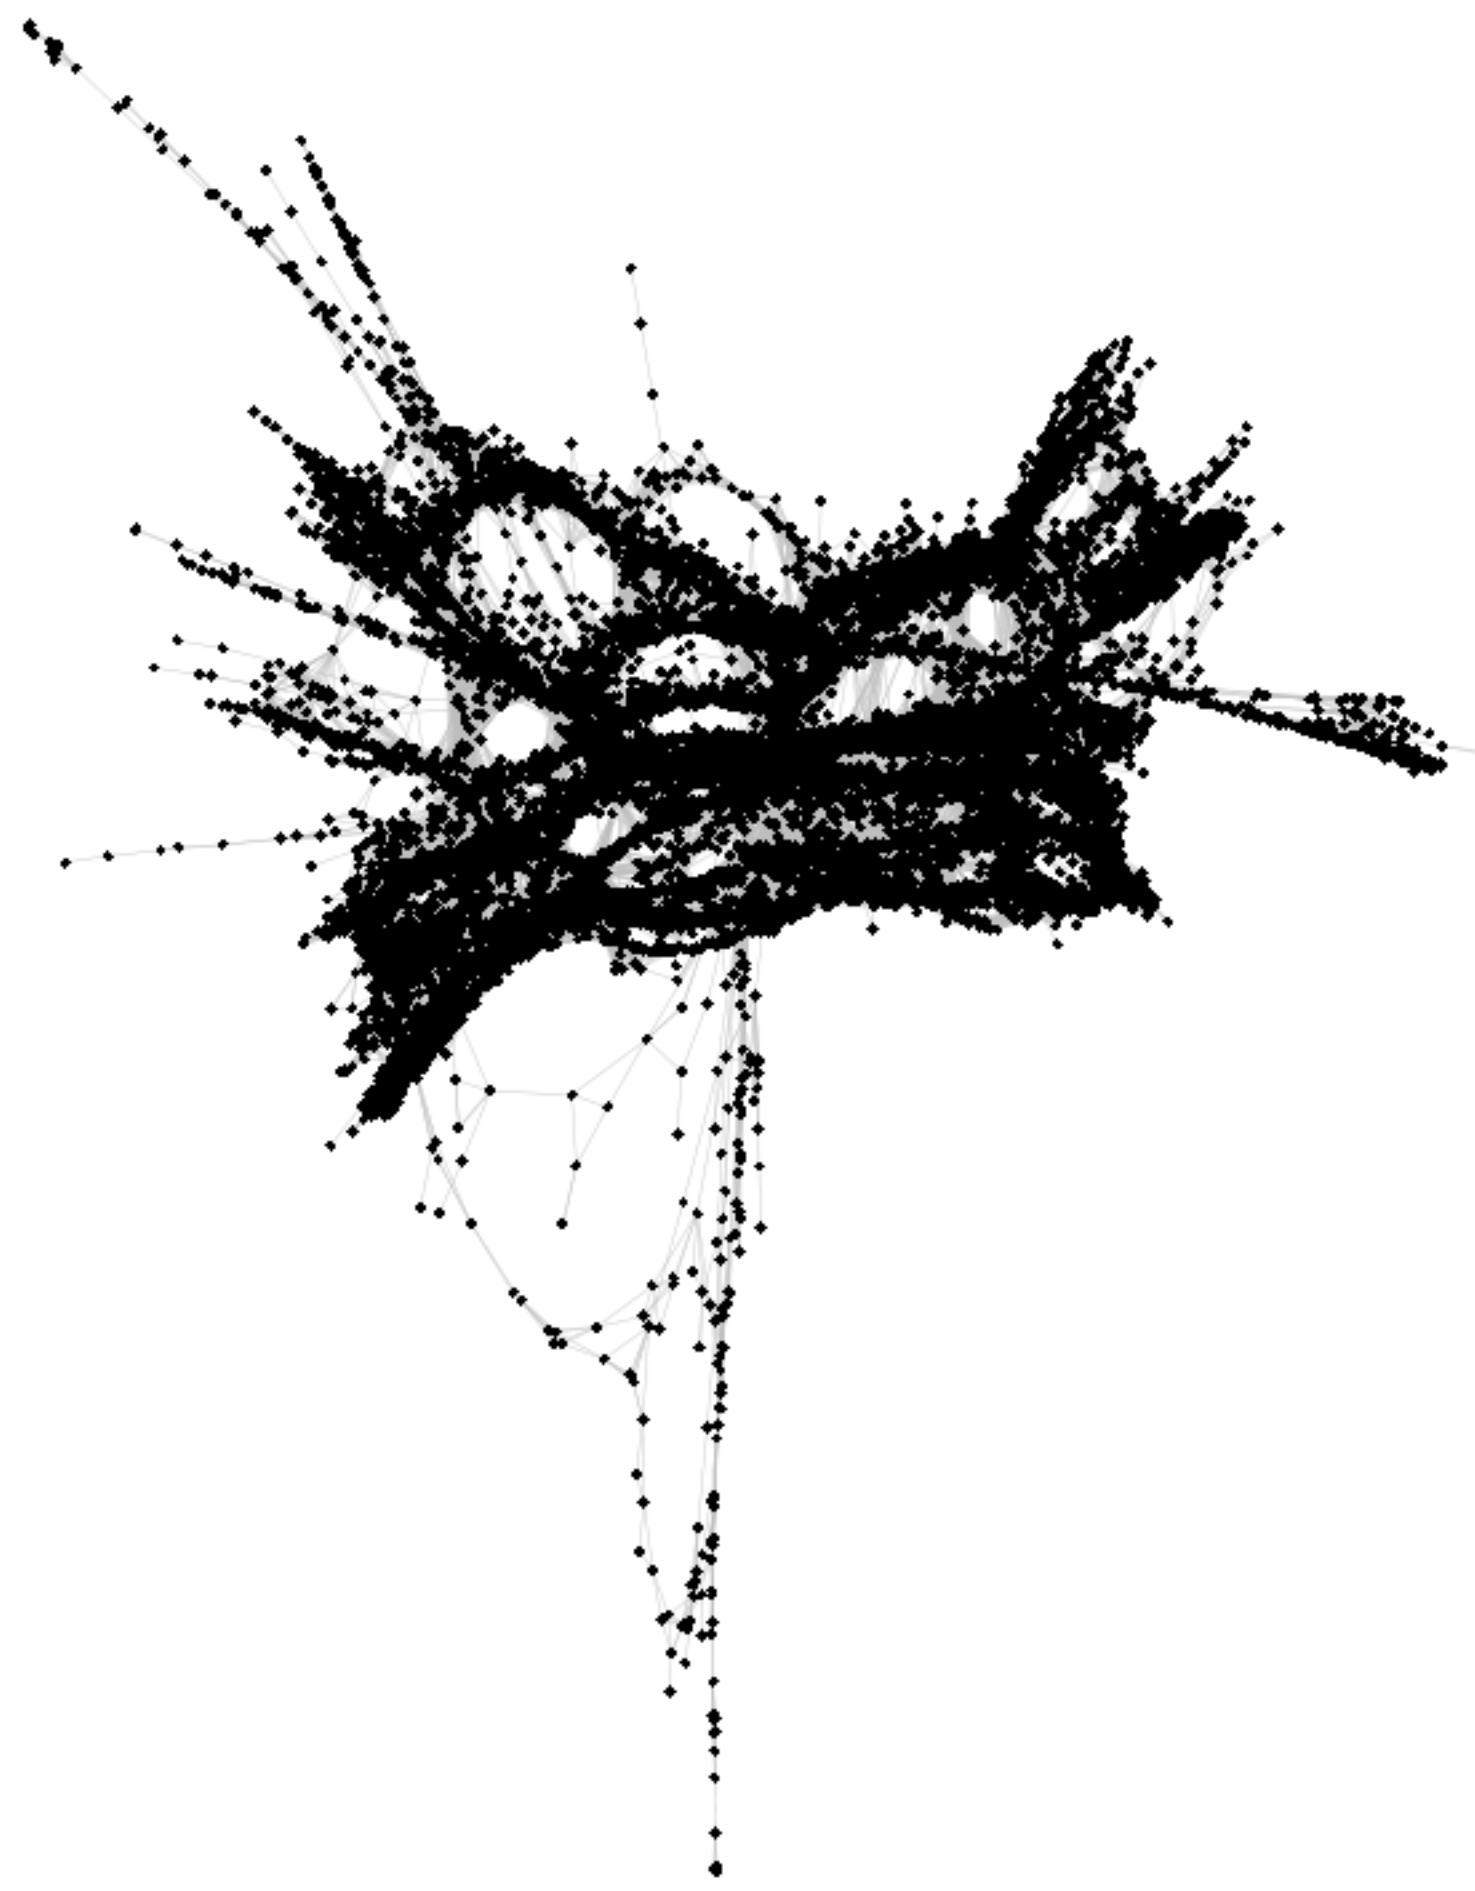

**CL2**

Number of reads: 18778  
Number of pairs: 985935  
Density: 0.005592  
Diameter: NA  
Mean edge weight: 154.75  
Max. degree: 484

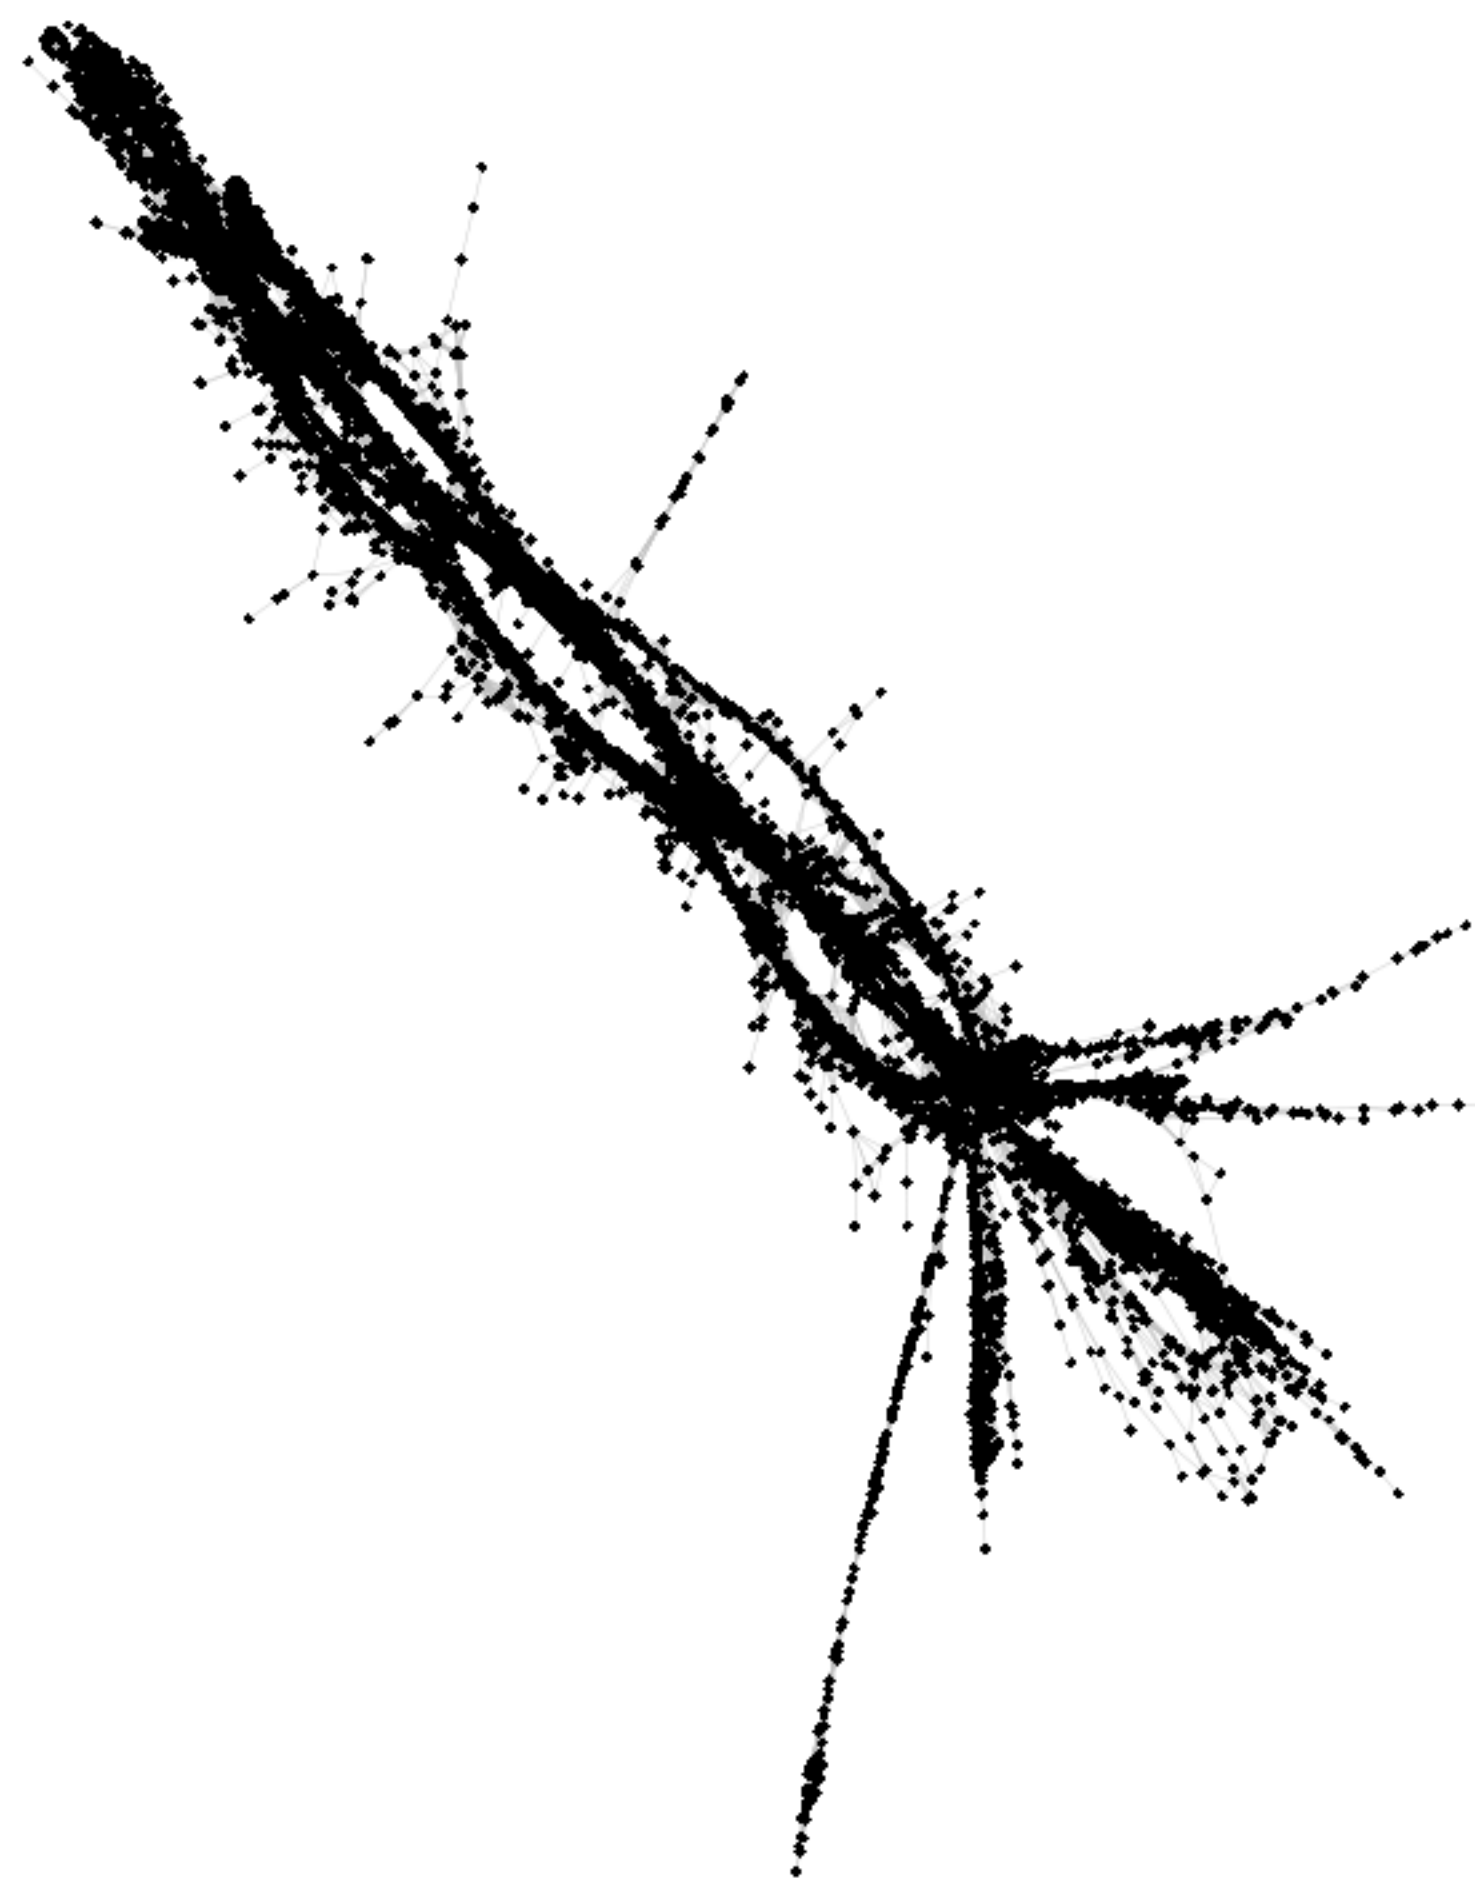

**CL3**

Number of reads: 17131  
Number of pairs: 1049951  
Density: 0.007156  
Diameter: NA  
Mean edge weight: 160.3  
Max. degree: 412

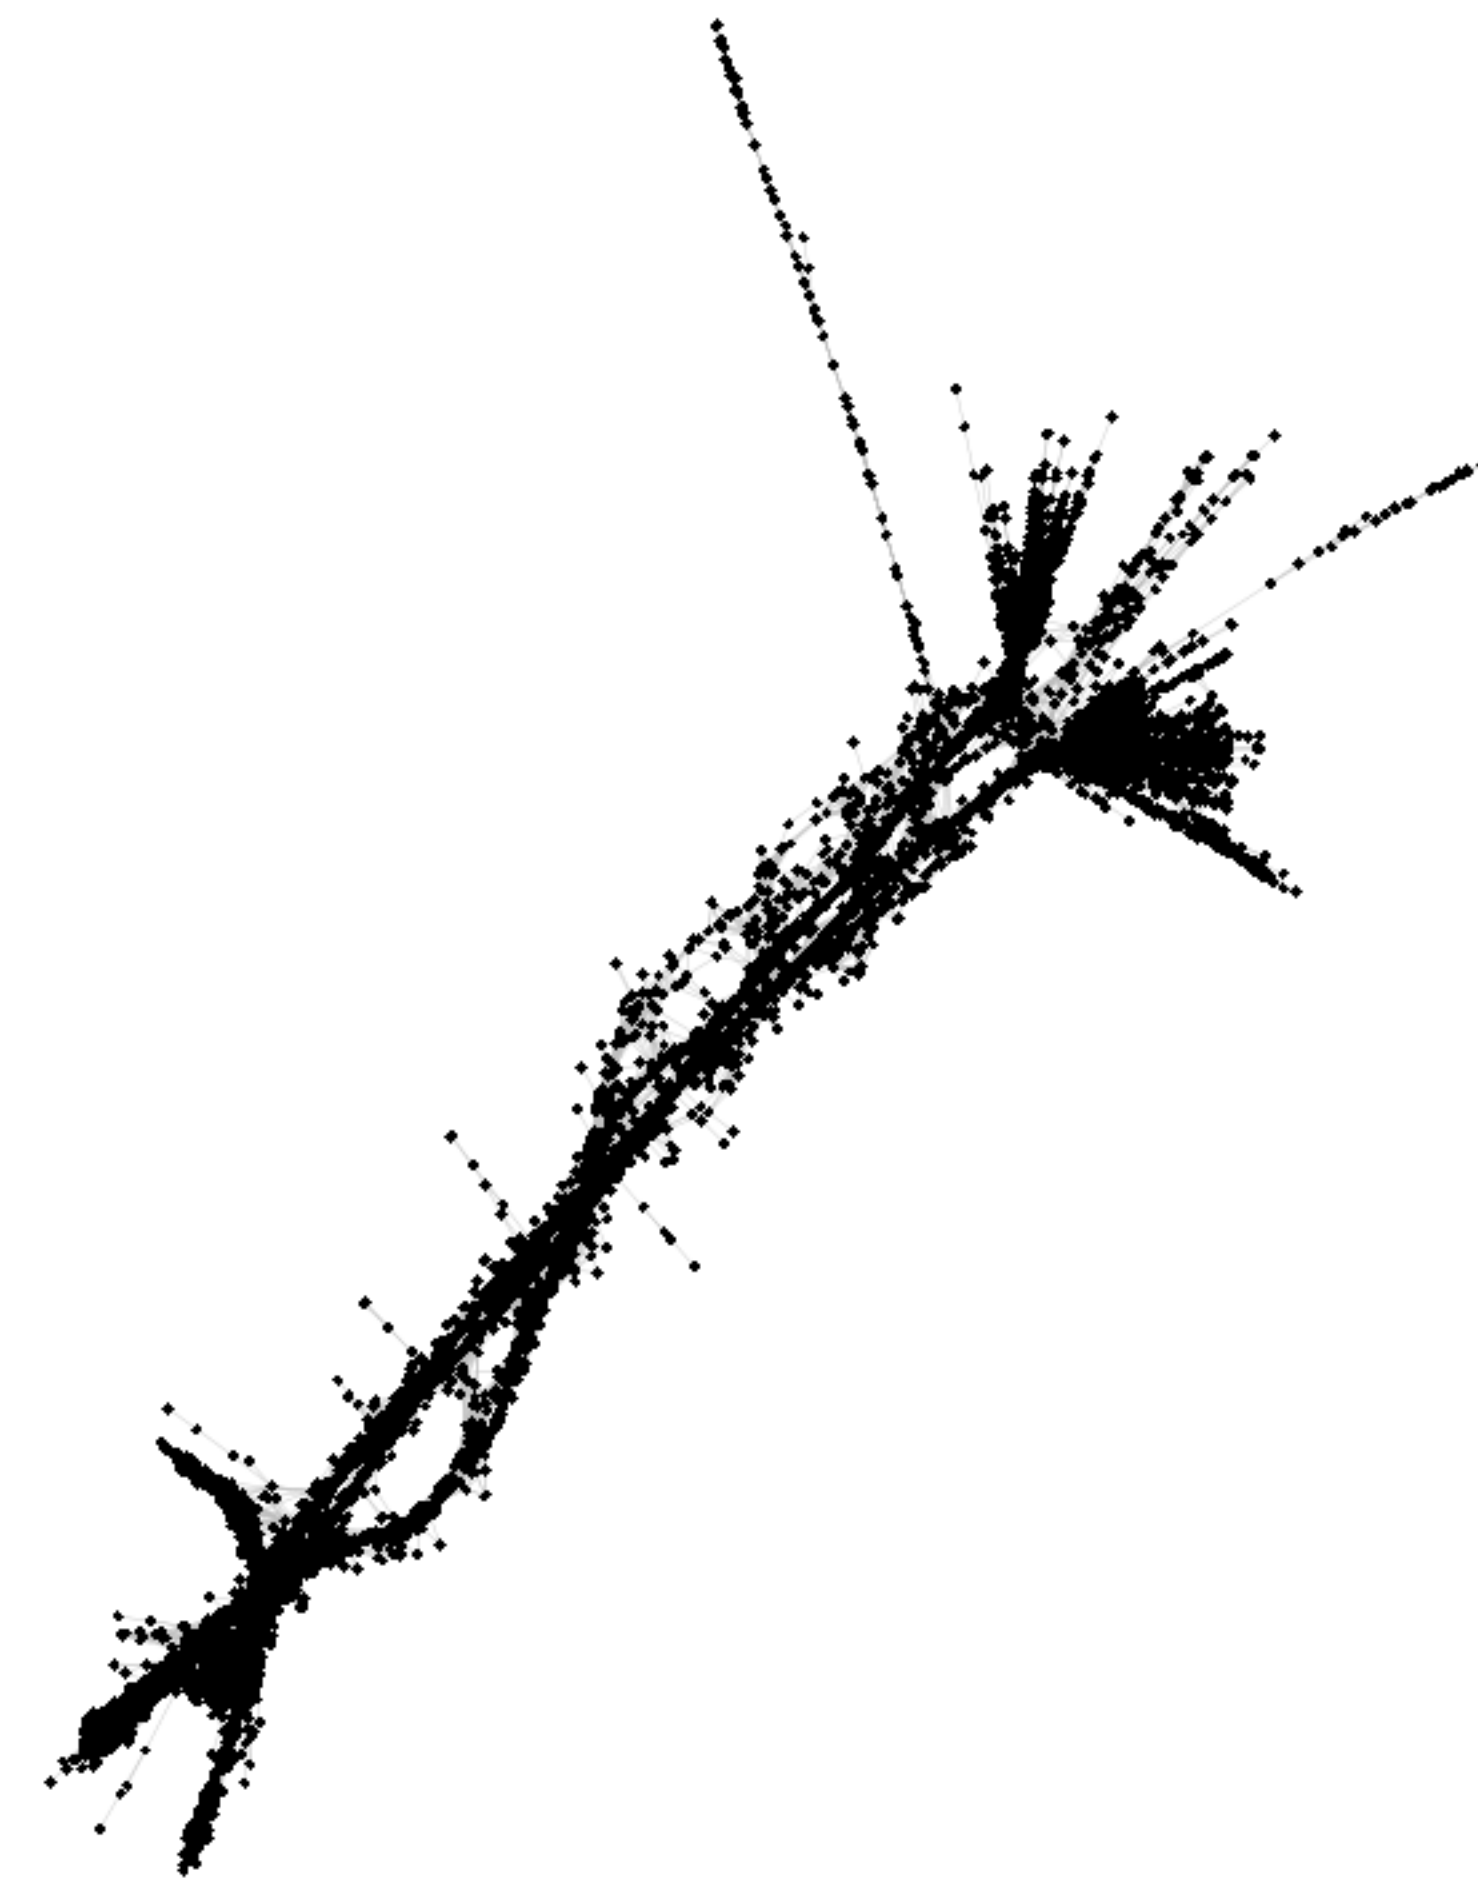

**CL4**

Number of reads: 16708  
Number of pairs: 1235523  
Density: 0.008852  
Diameter: NA  
Mean edge weight: 160.24  
Max. degree: 531

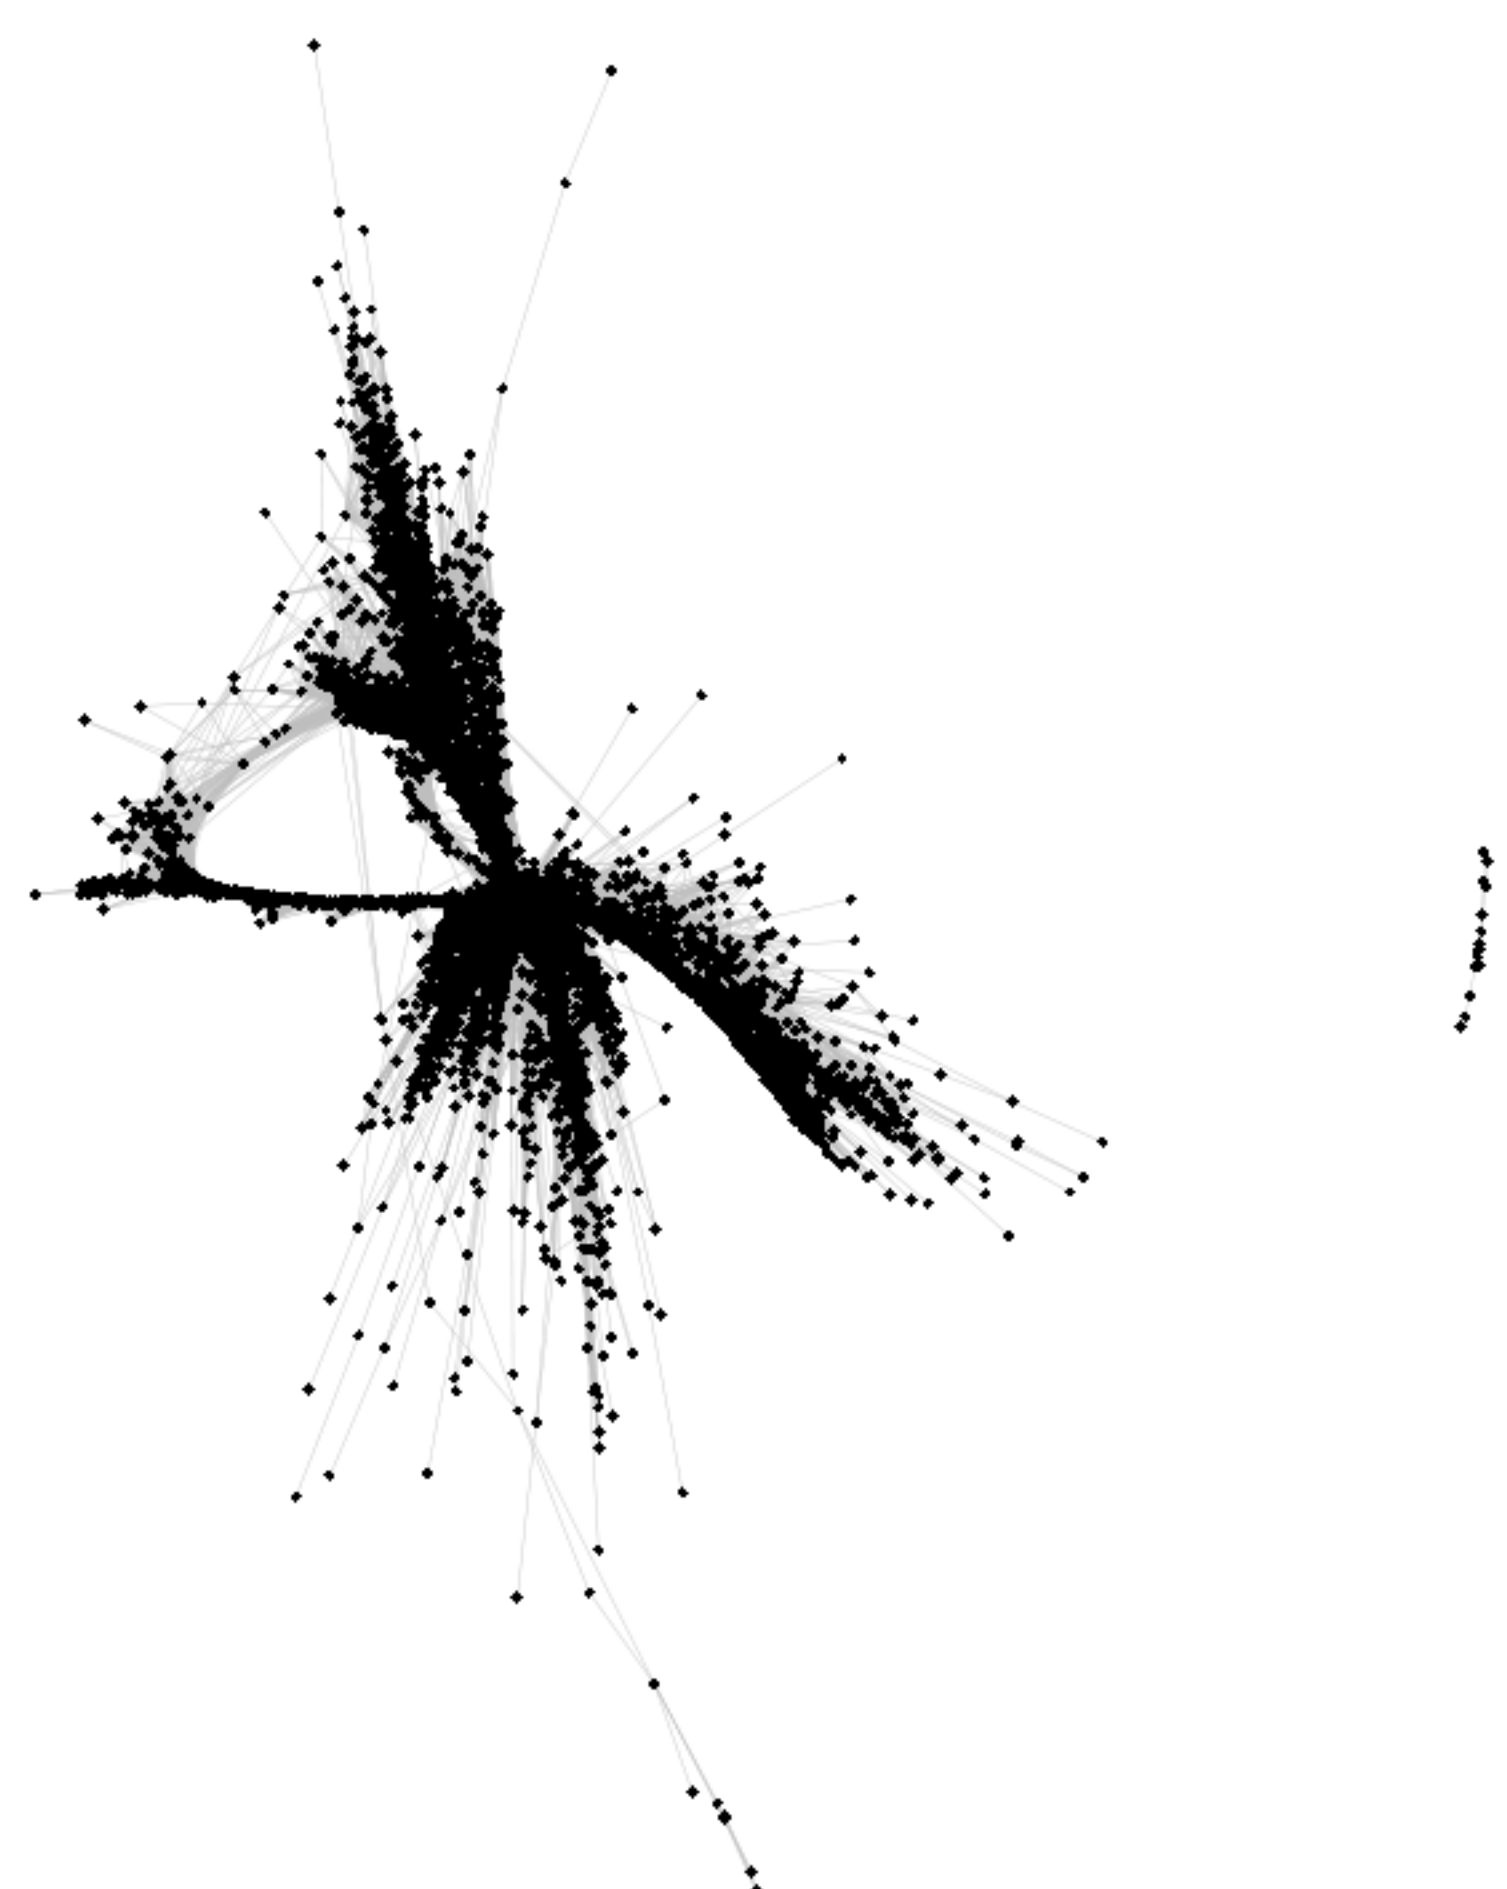

**CL5**

Number of reads: 16288  
Number of pairs: 5218529  
Density: 0.03934  
Diameter: NA  
Mean edge weight: 156.78  
Max. degree: 3199

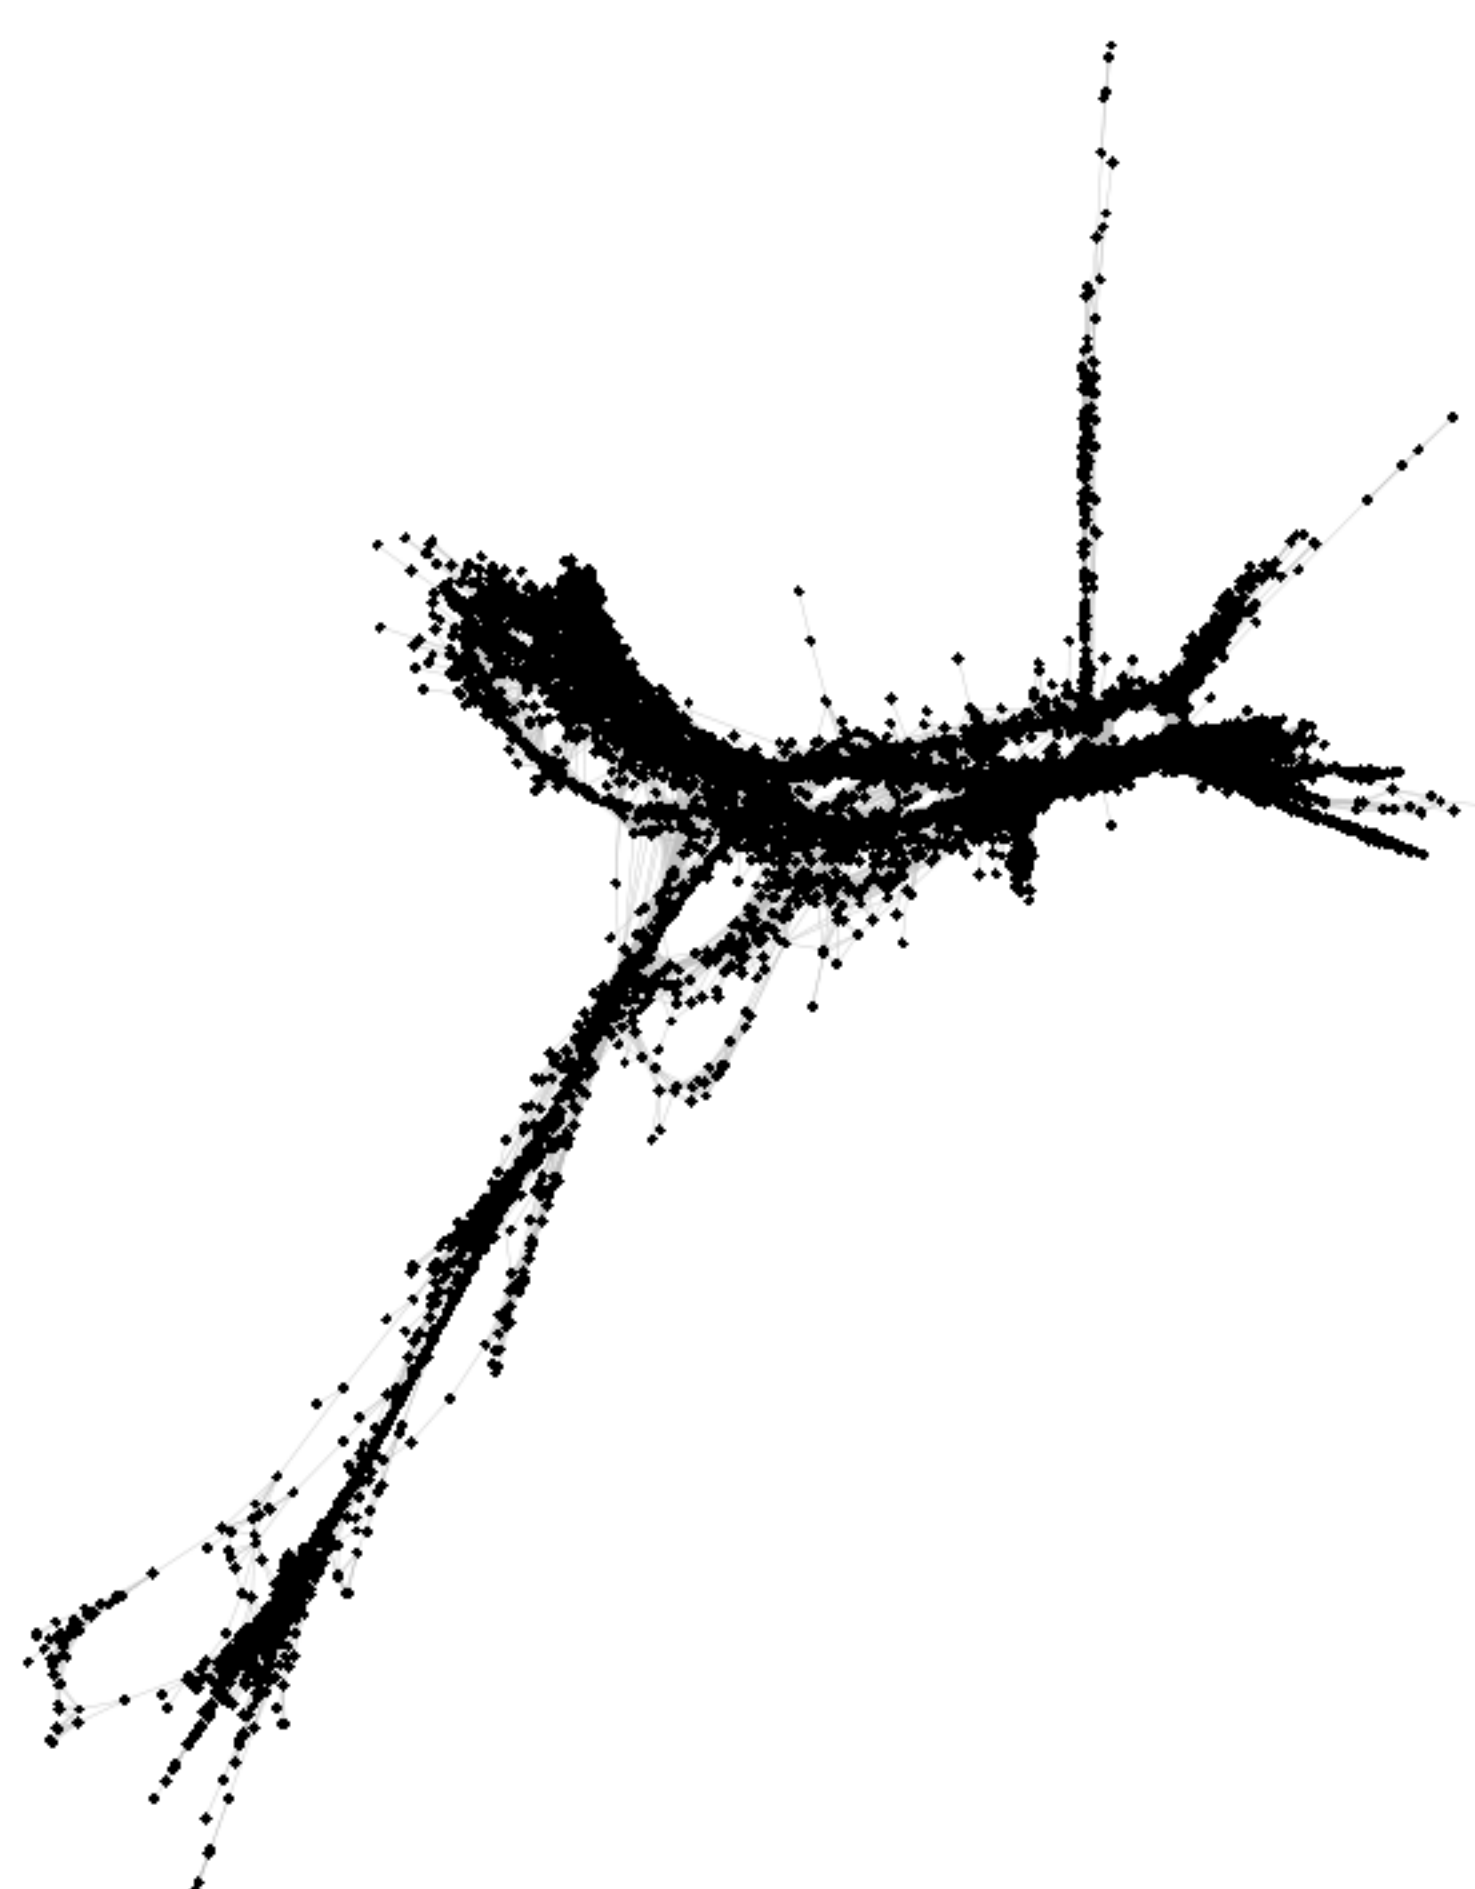

**CL6**

Number of reads: 16110  
Number of pairs: 2024528  
Density: 0.0156  
Diameter: NA  
Mean edge weight: 159.68  
Max. degree: 1095

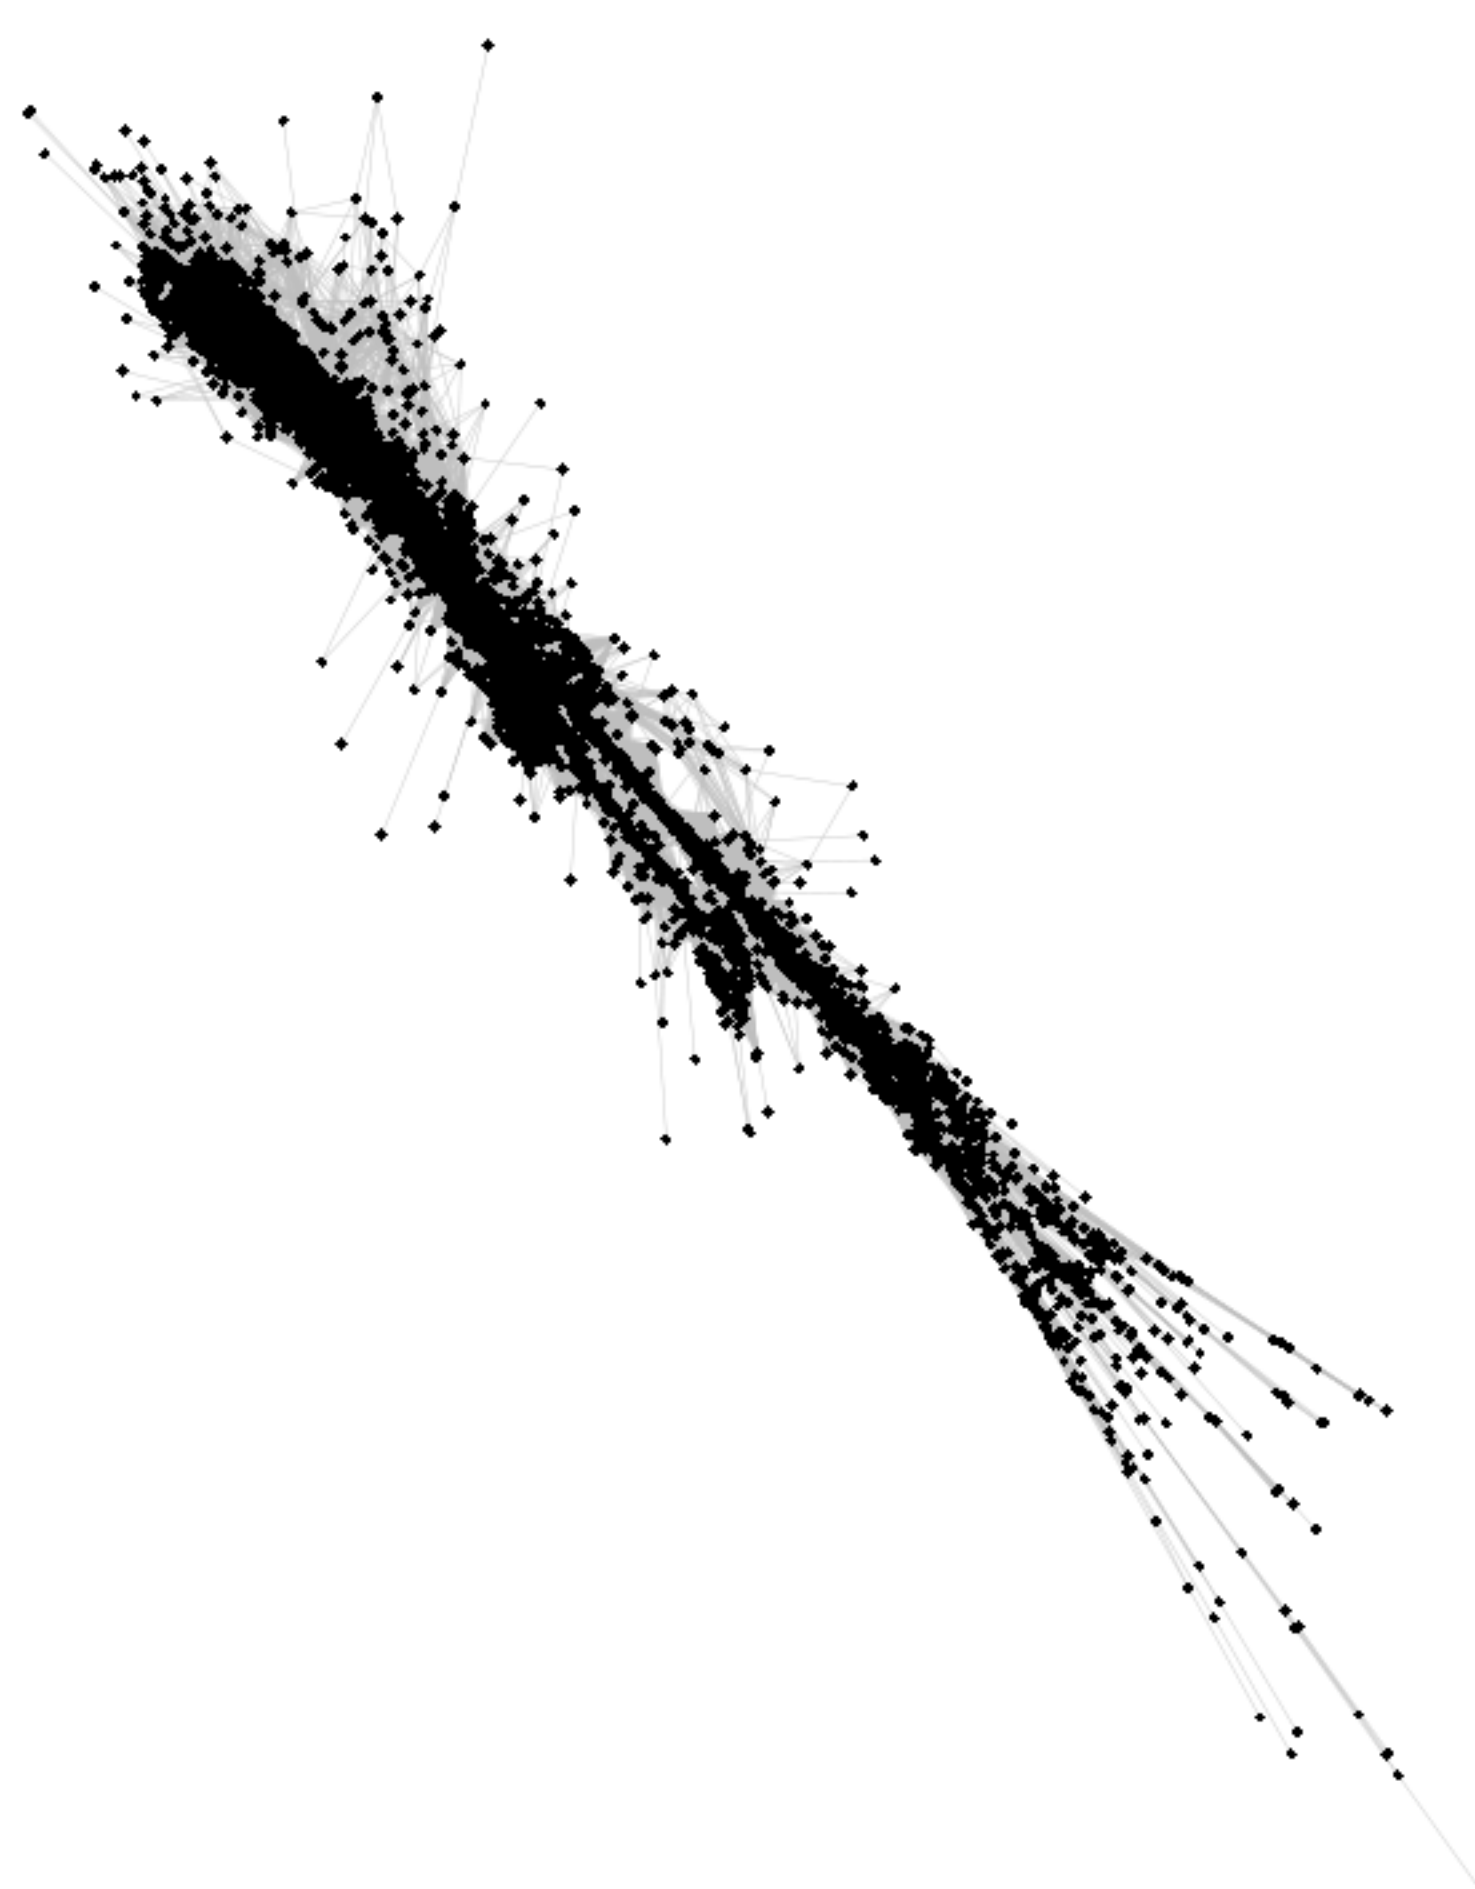

**CL7**

Number of reads: 15720  
Number of pairs: 7636138  
Density: 0.06181  
Diameter: NA  
Mean edge weight: 160.97  
Max. degree: 2458

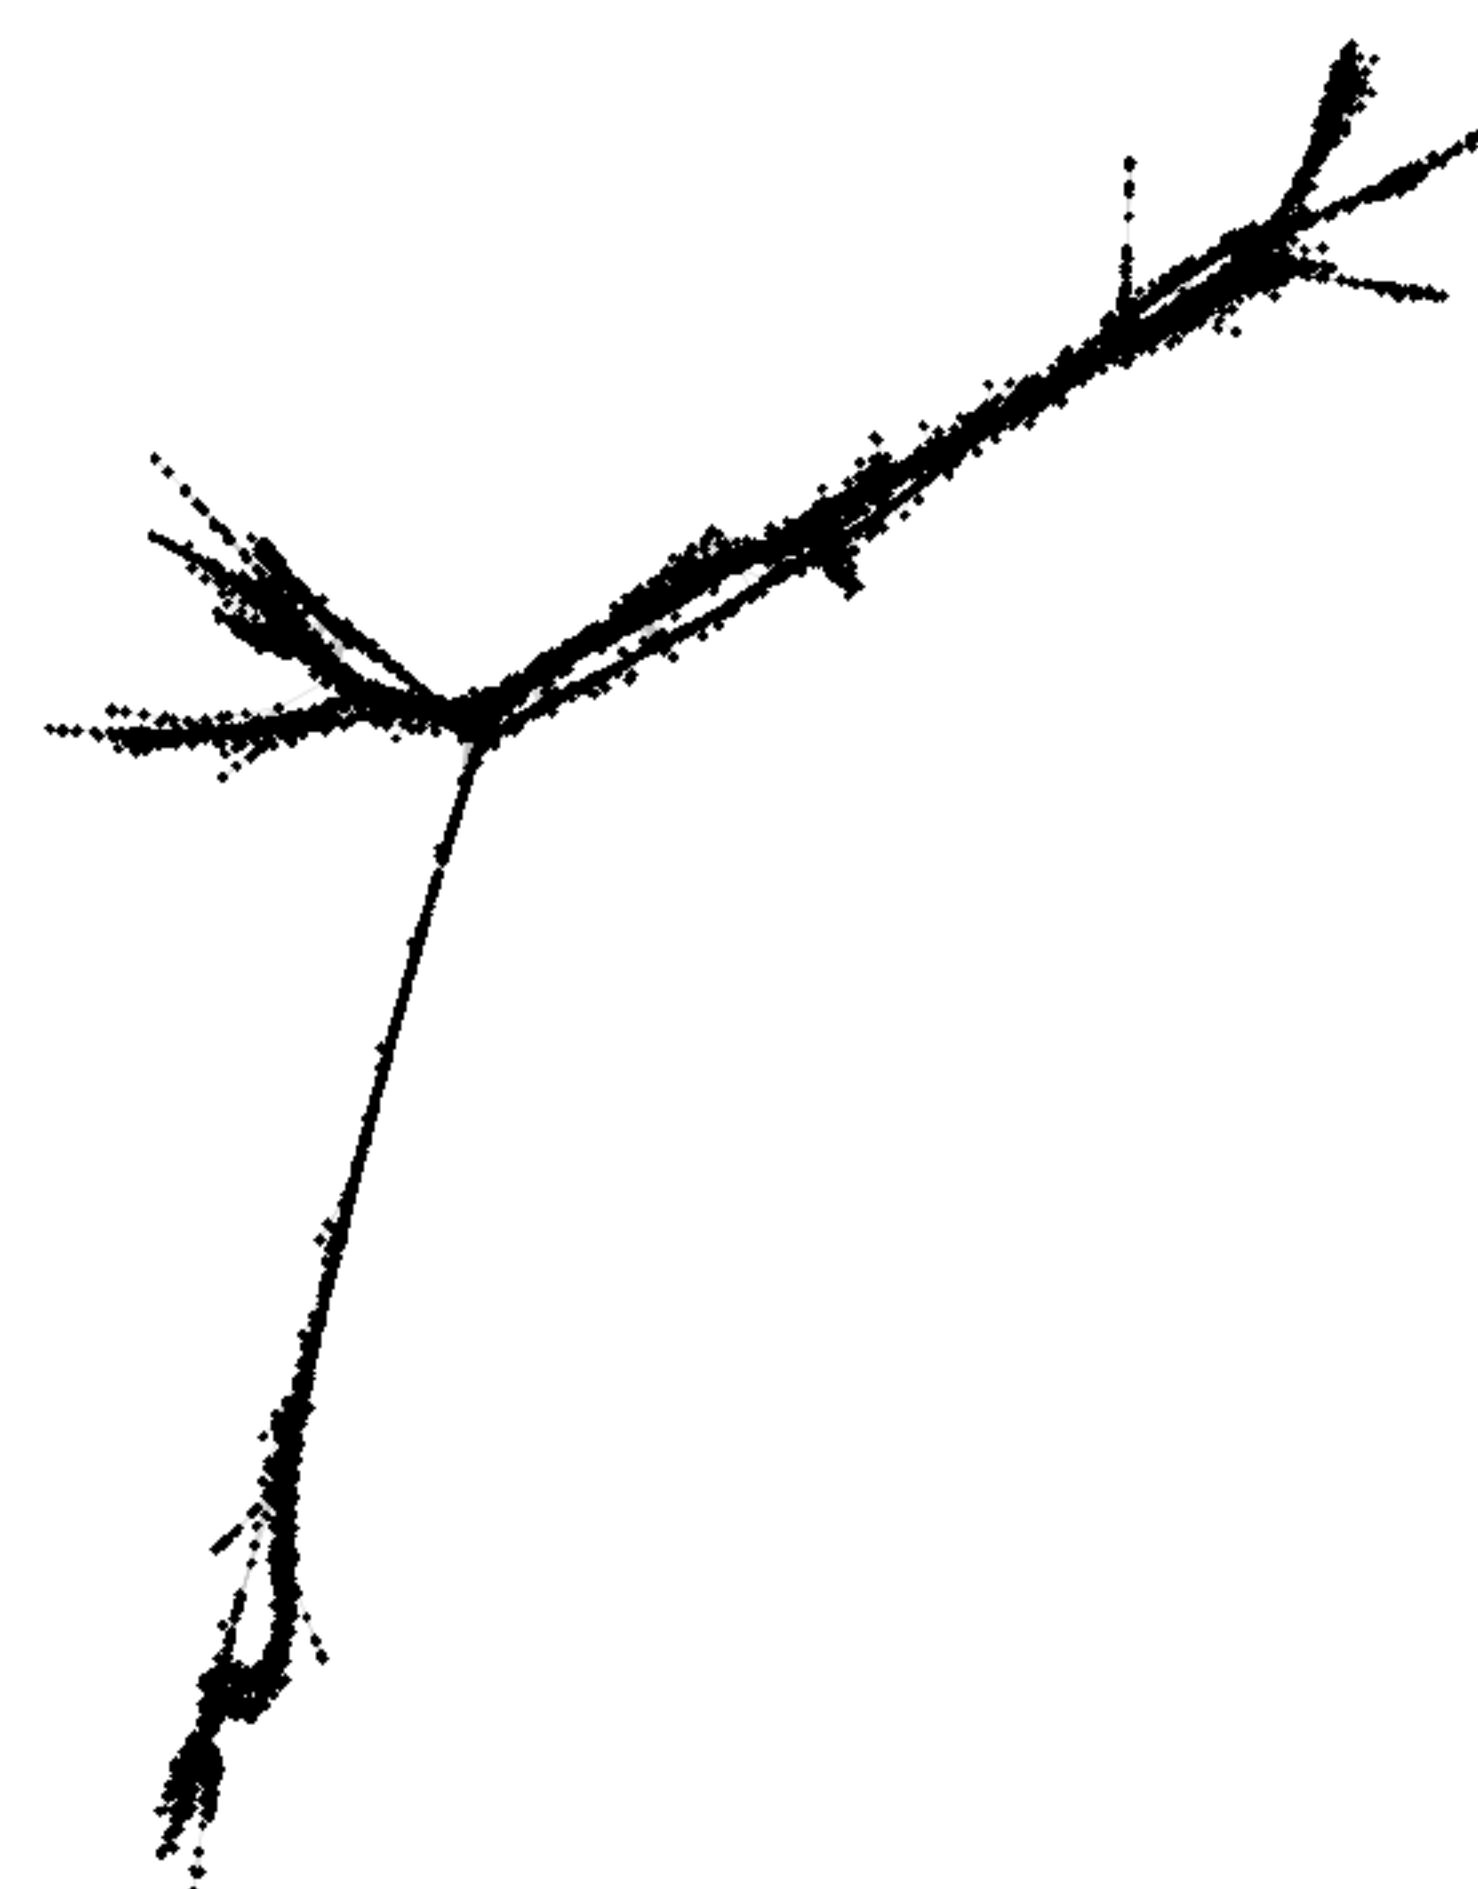

**CL8**

Number of reads: 15537  
Number of pairs: 606351  
Density: 0.005024  
Diameter: NA  
Mean edge weight: 165.32  
Max. degree: 279

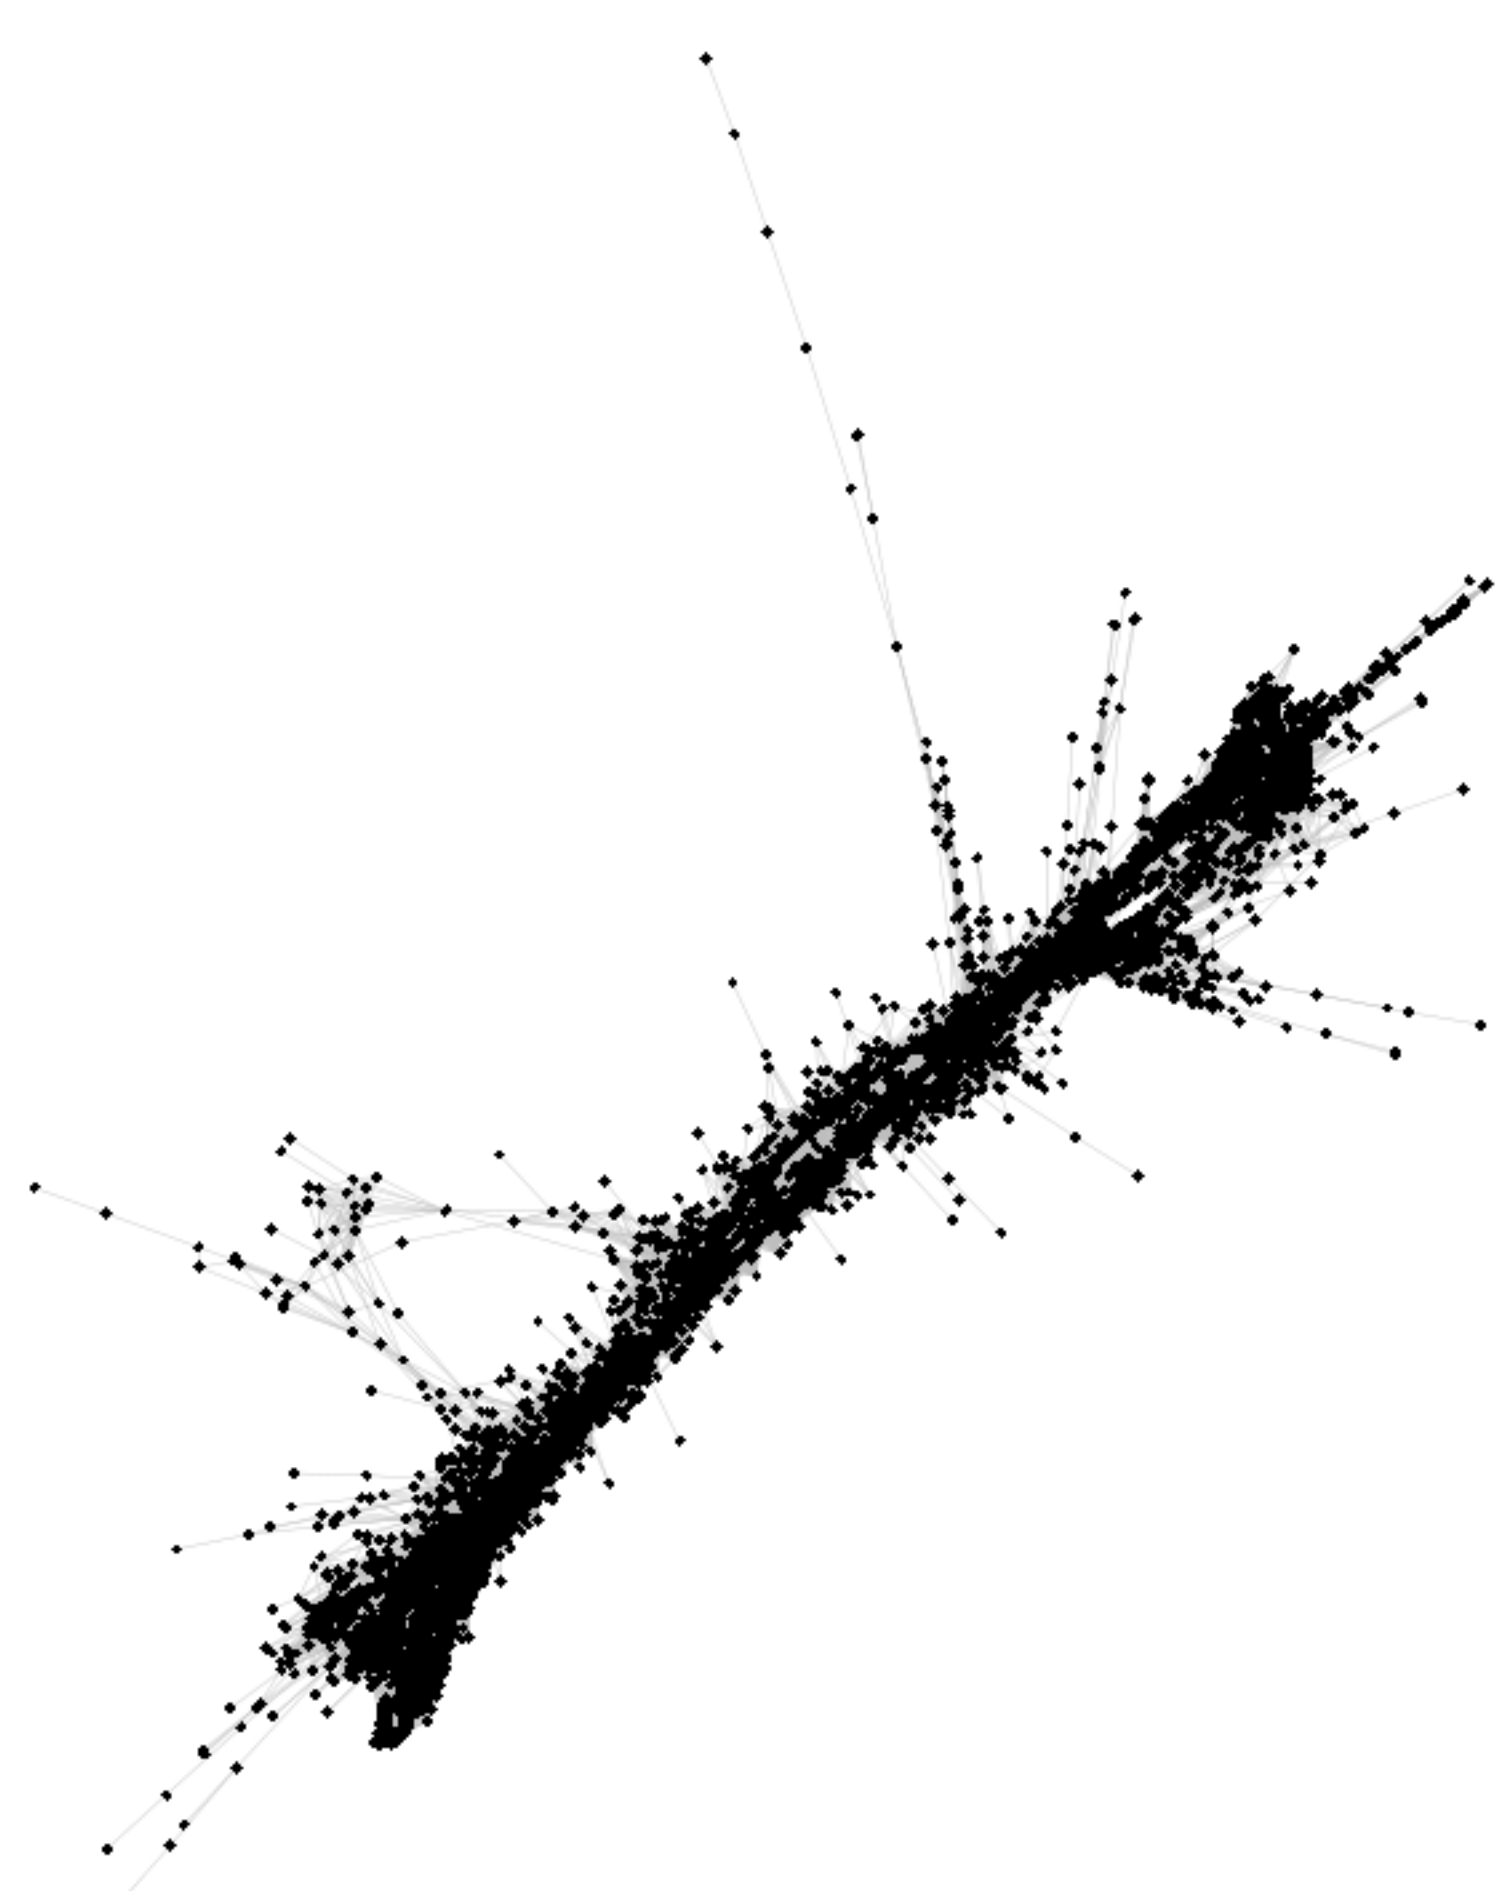

**CL9**

Number of reads: 15281  
Number of pairs: 3630522  
Density: 0.0311  
Diameter: NA  
Mean edge weight: 163.69  
Max. degree: 1194

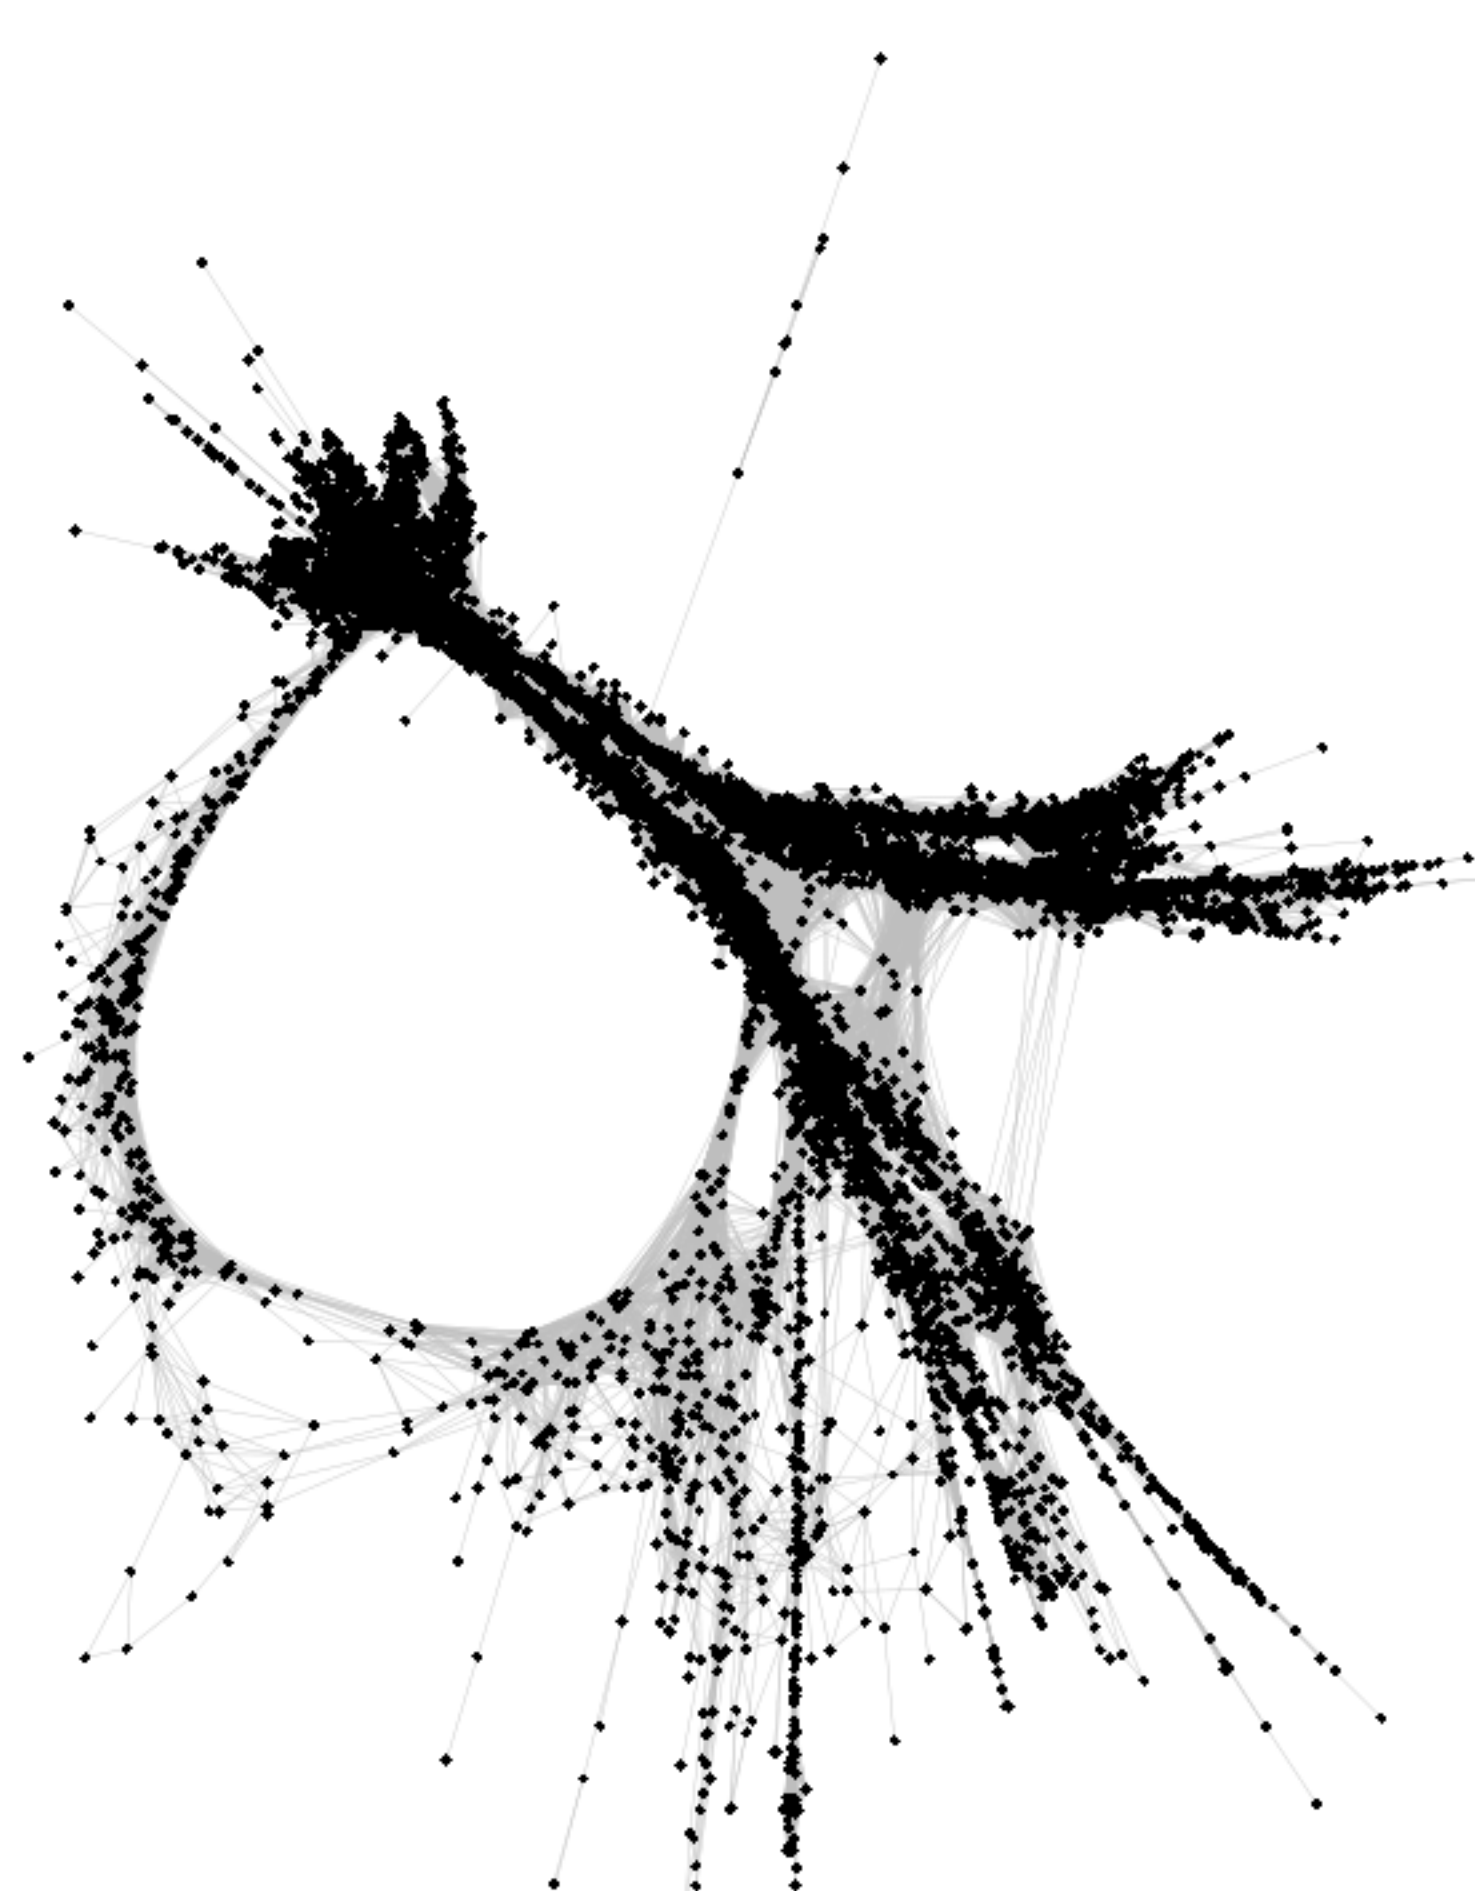

**CL10**

Number of reads: 14982  
Number of pairs: 3261777  
Density: 0.02907  
Diameter: NA  
Mean edge weight: 156.98  
Max. degree: 1681

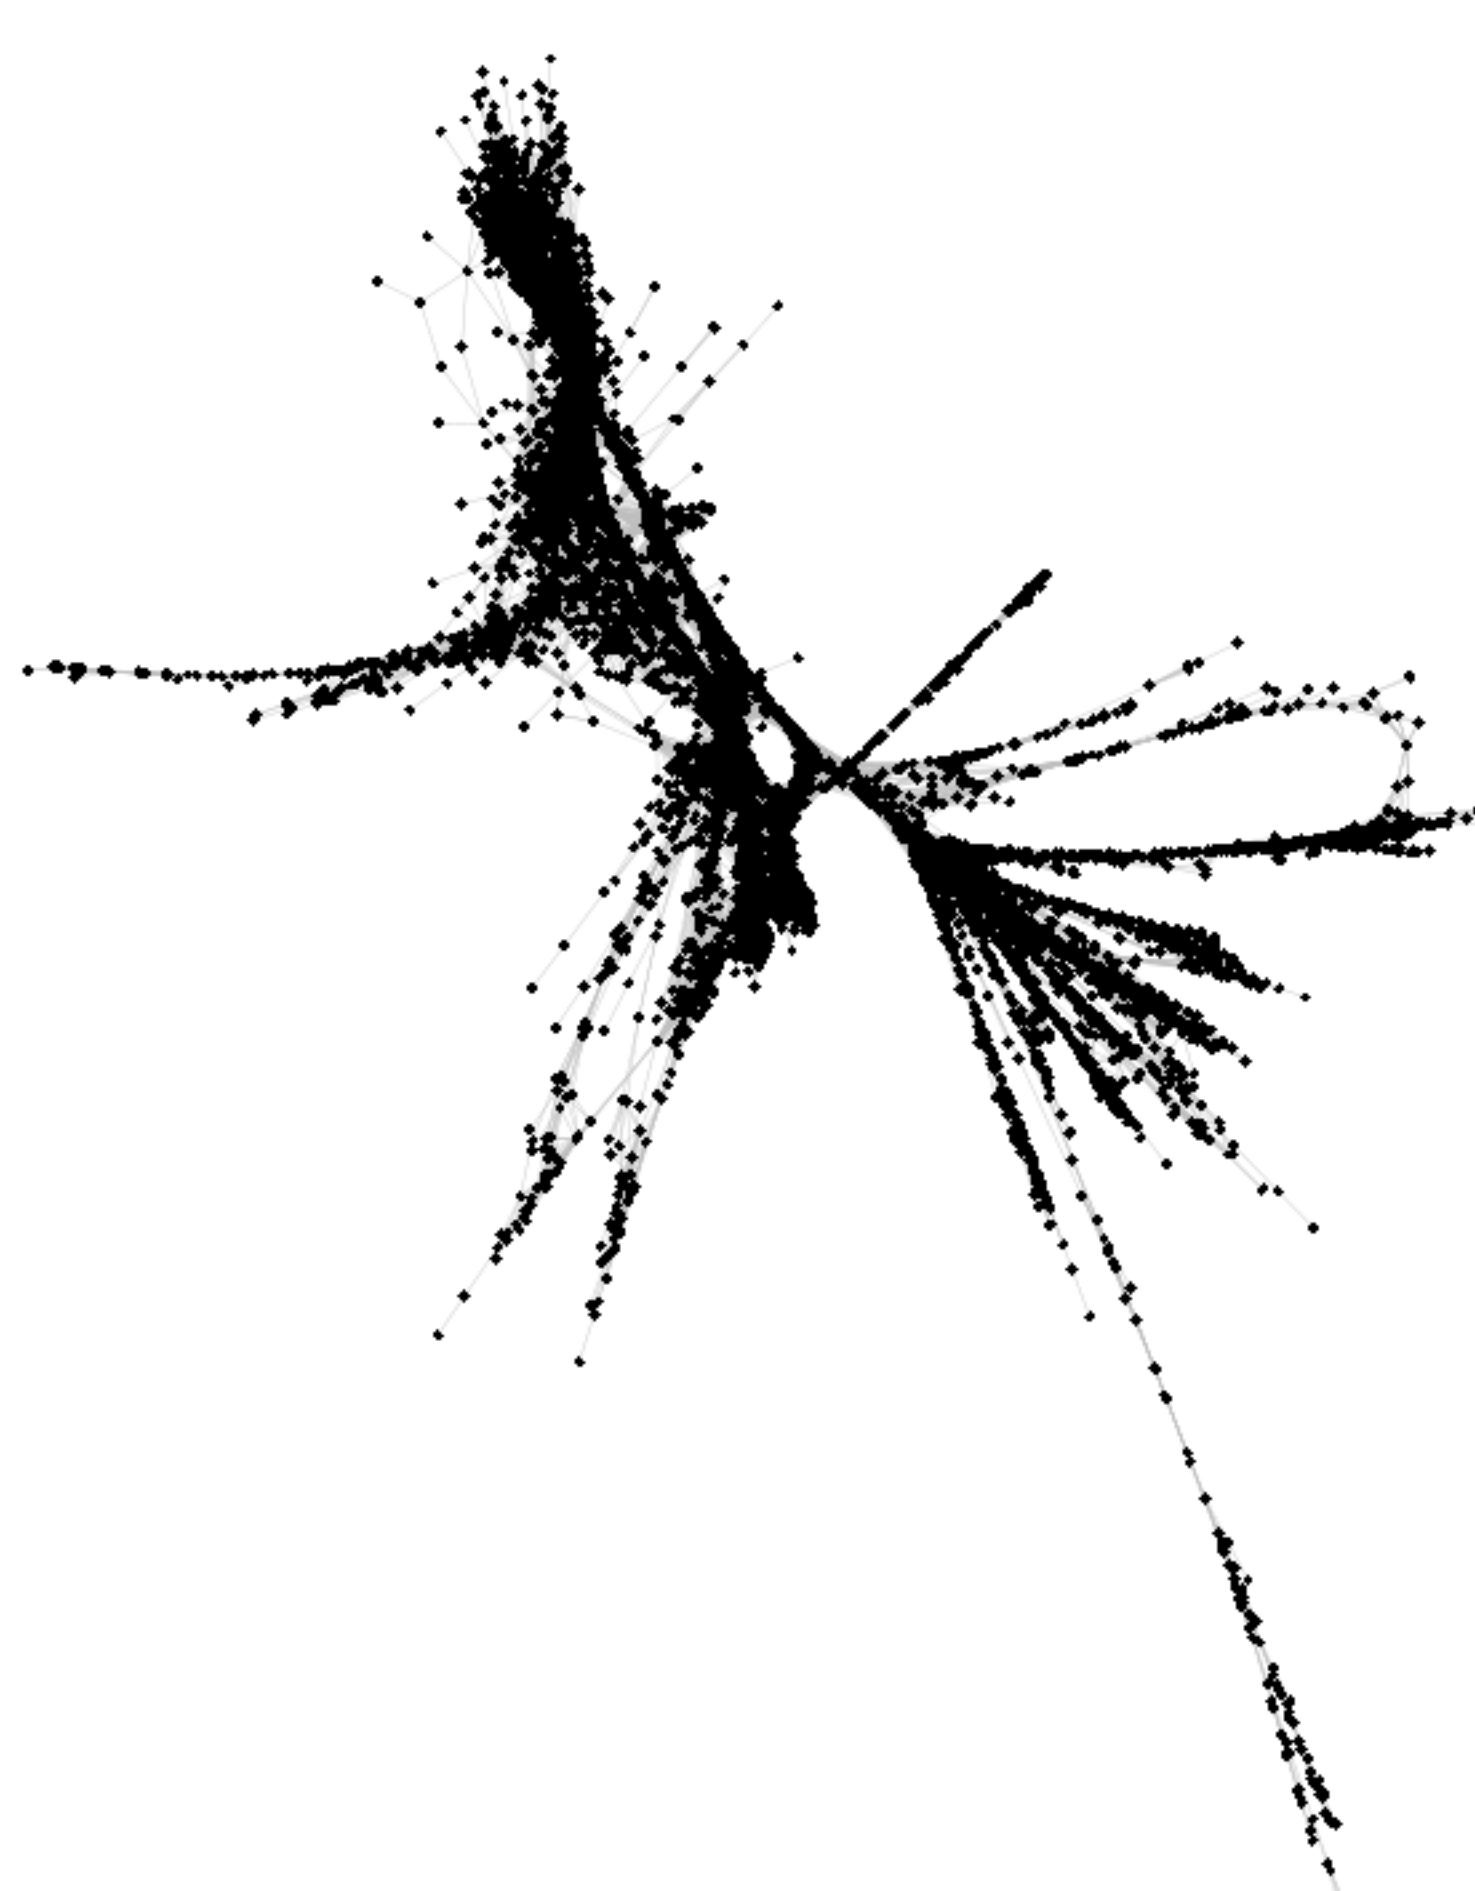

**CL11**

Number of reads: 14981  
Number of pairs: 1696169  
Density: 0.01512  
Diameter: NA  
Mean edge weight: 156.26  
Max. degree: 1023

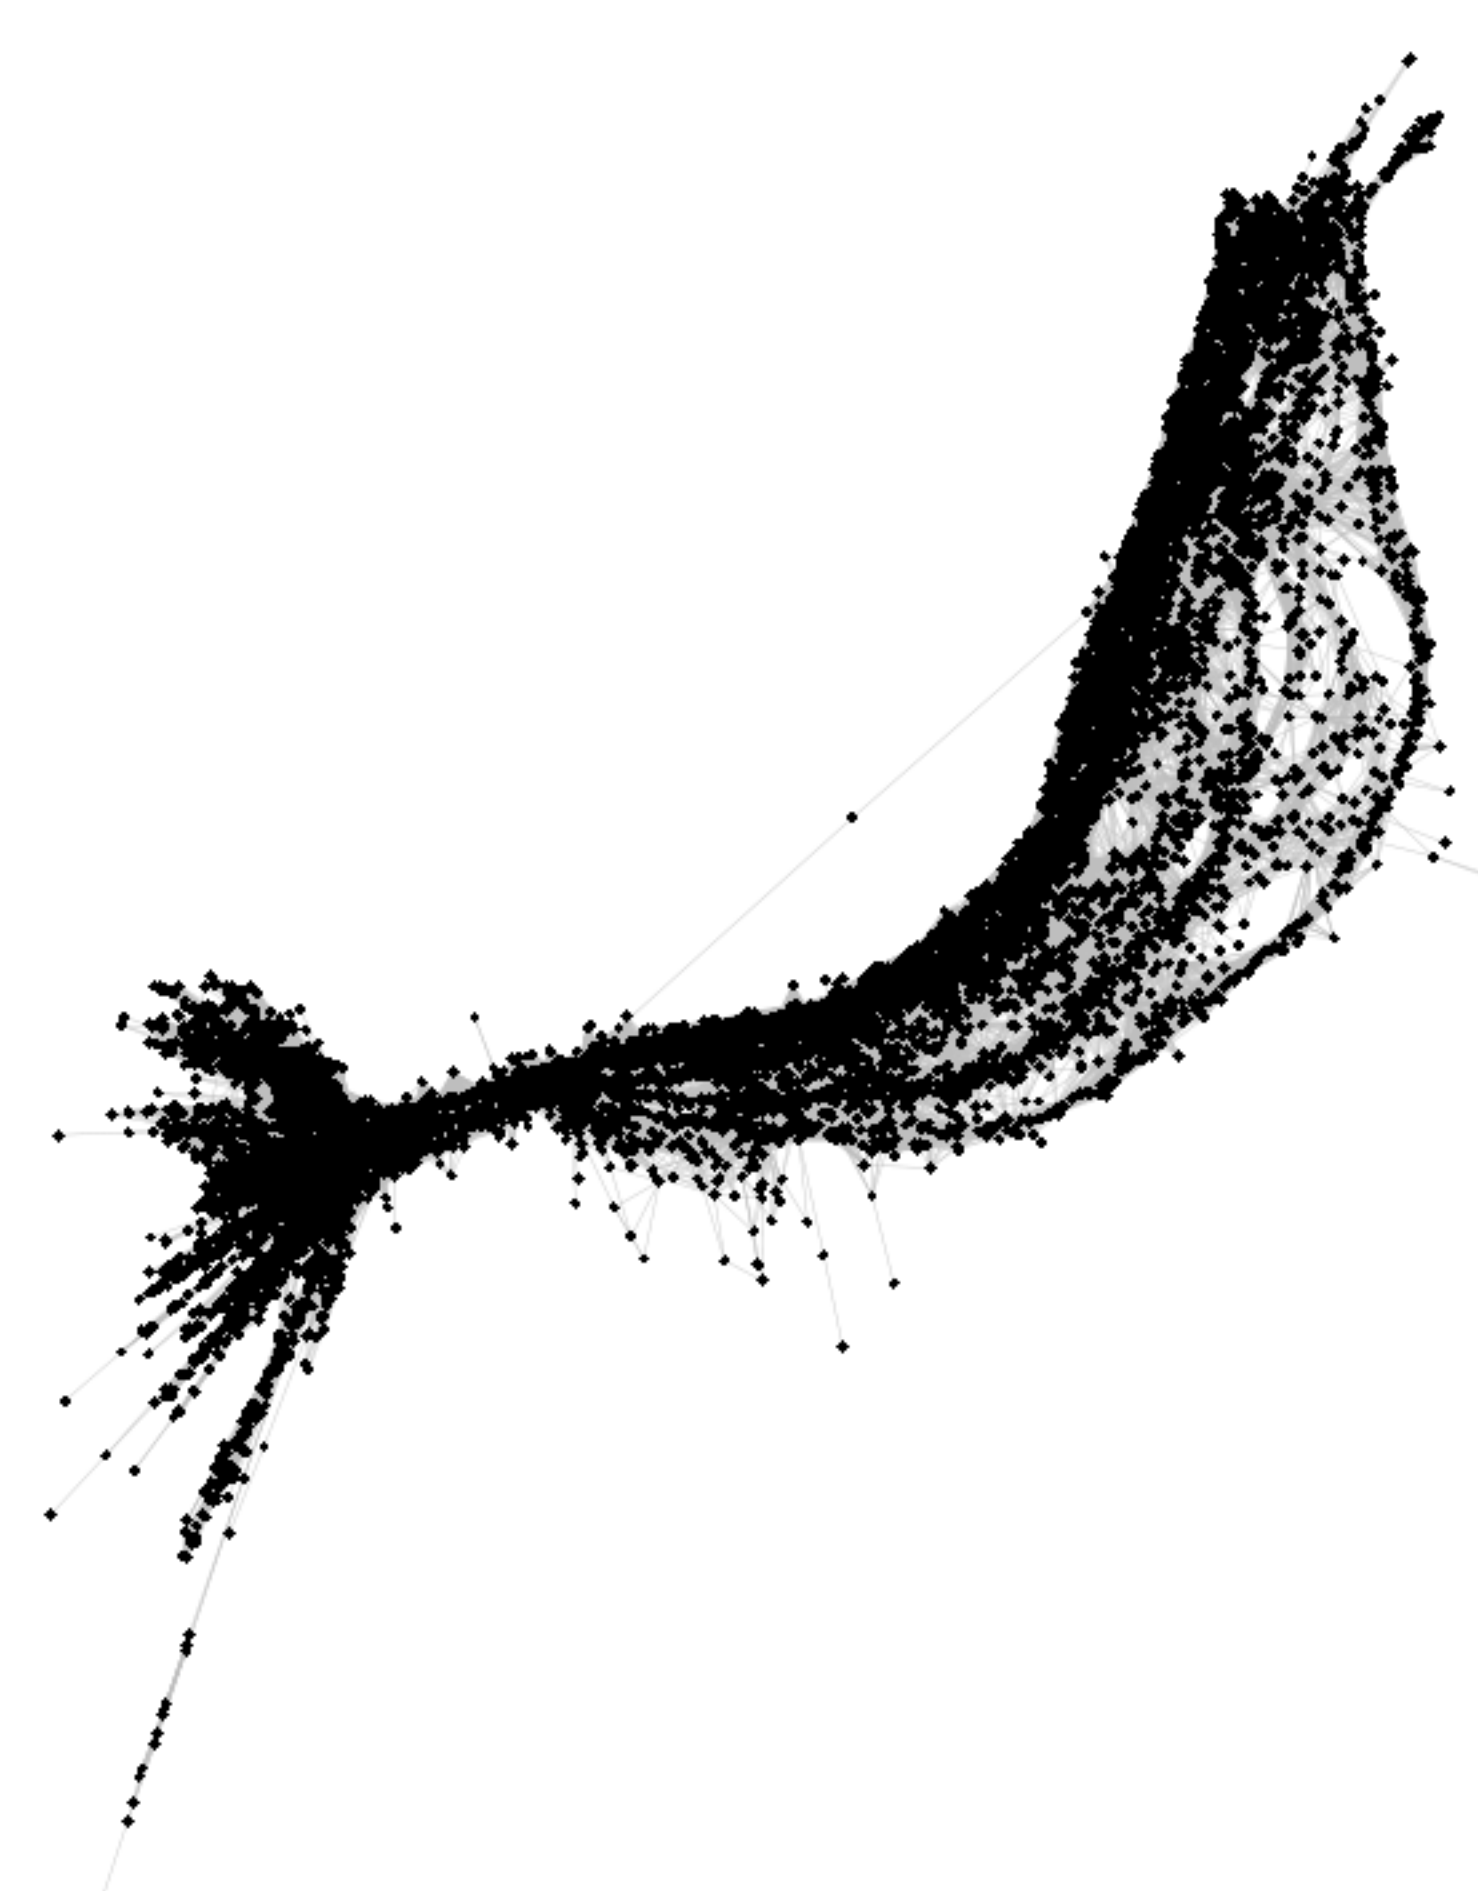

**CL12**

Number of reads: 14609  
Number of pairs: 1465923  
Density: 0.01374  
Diameter: NA  
Mean edge weight: 157.17  
Max. degree: 830

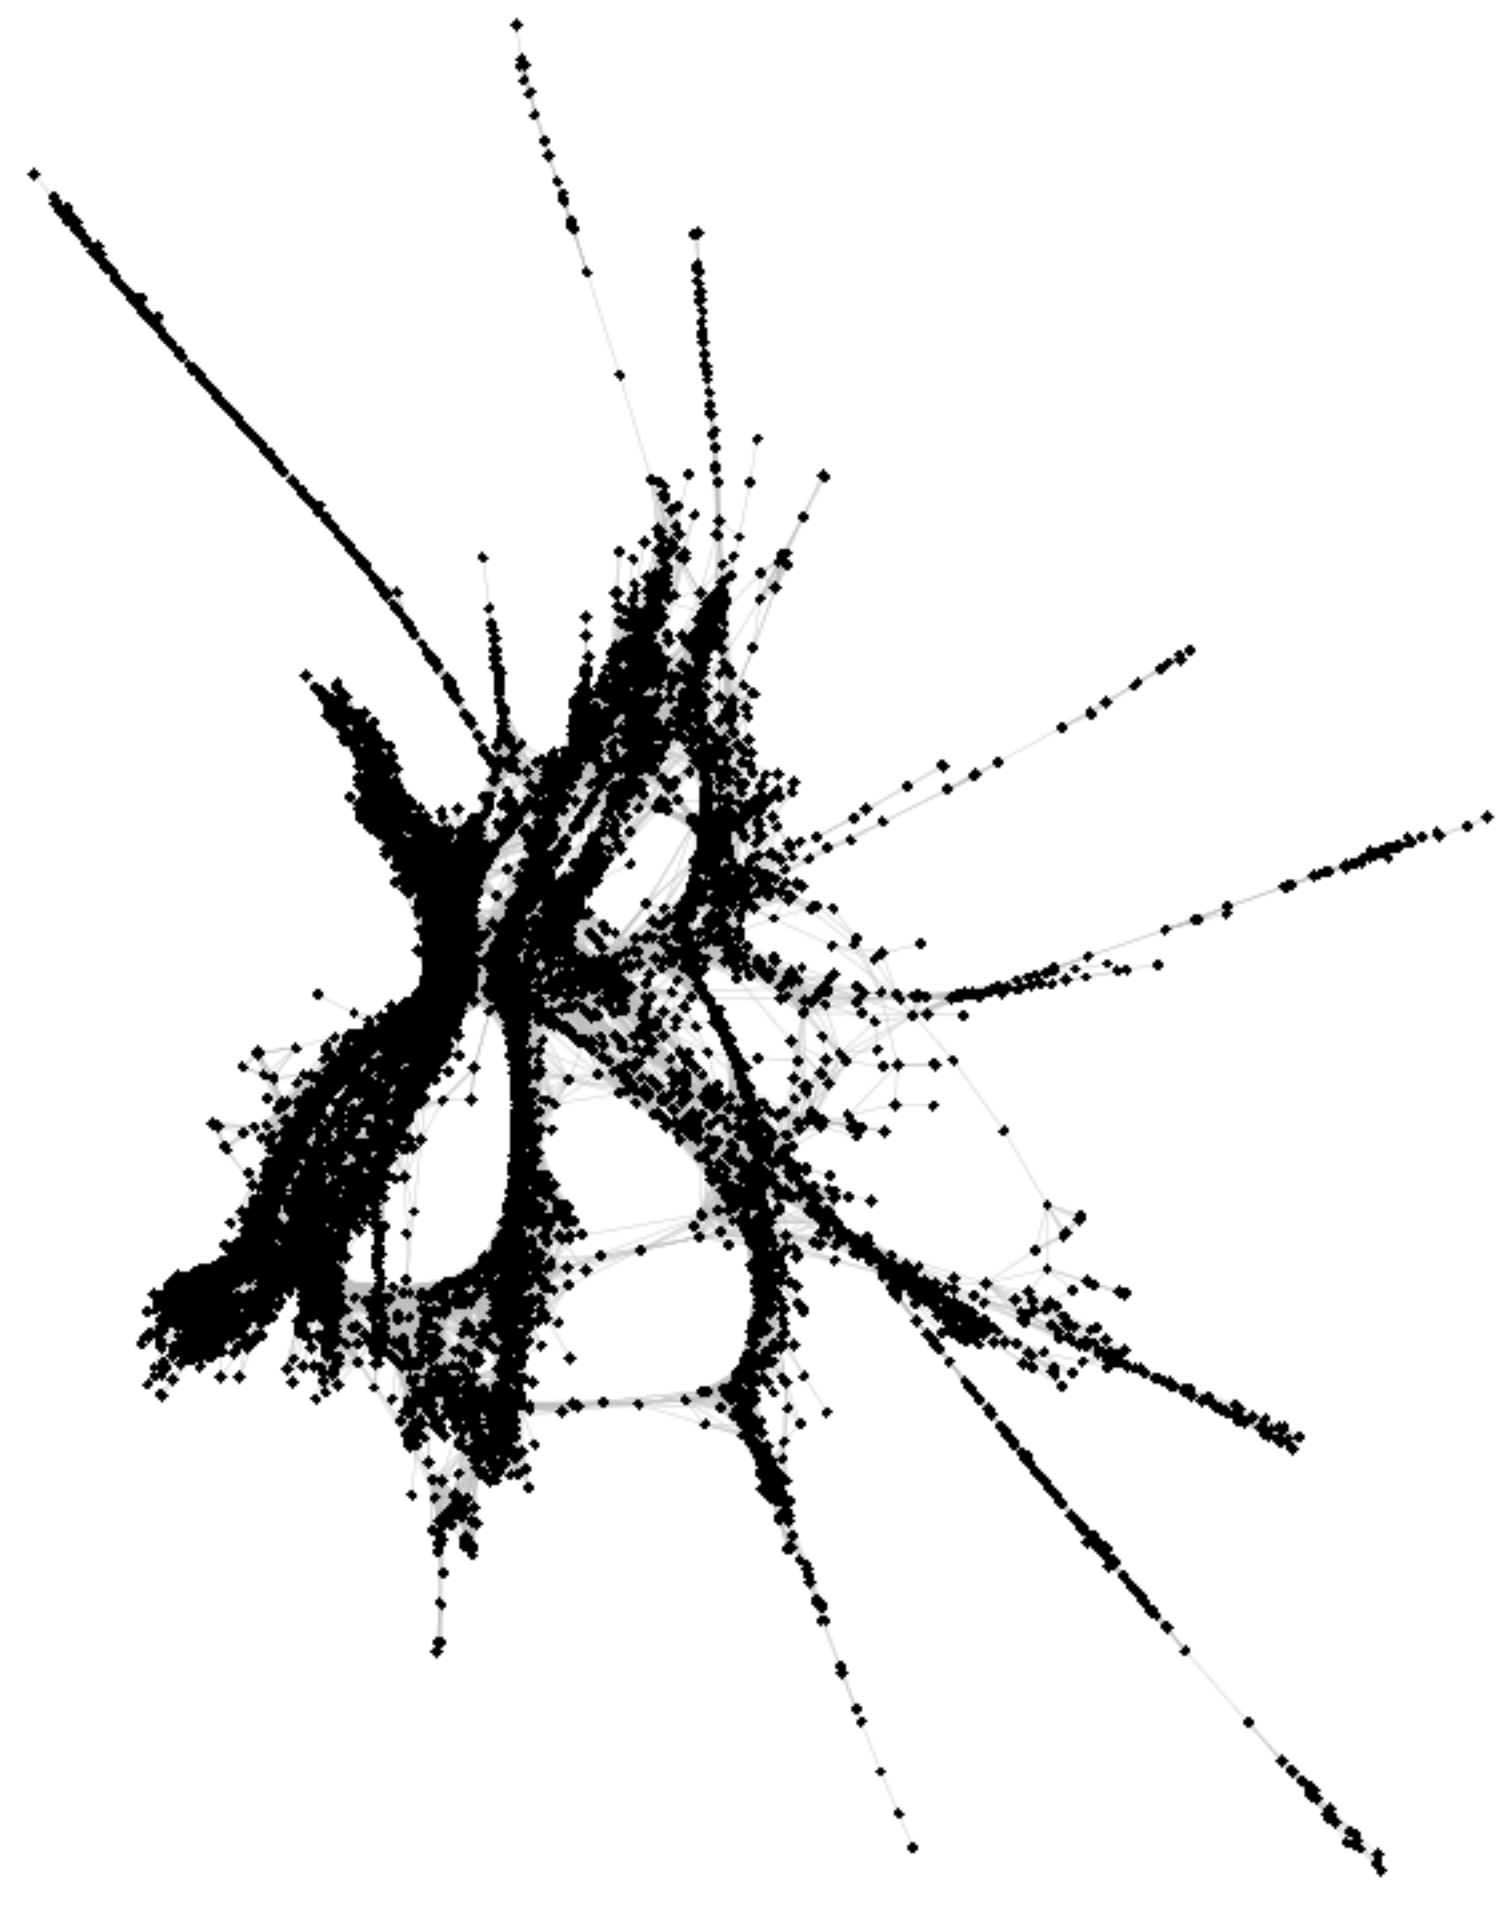

**CL13**

Number of reads: 13883  
 Number of pairs: 664510  
 Density: 0.006896  
 Diameter: NA  
 Mean edge weight: 149.59  
 Max. degree: 684

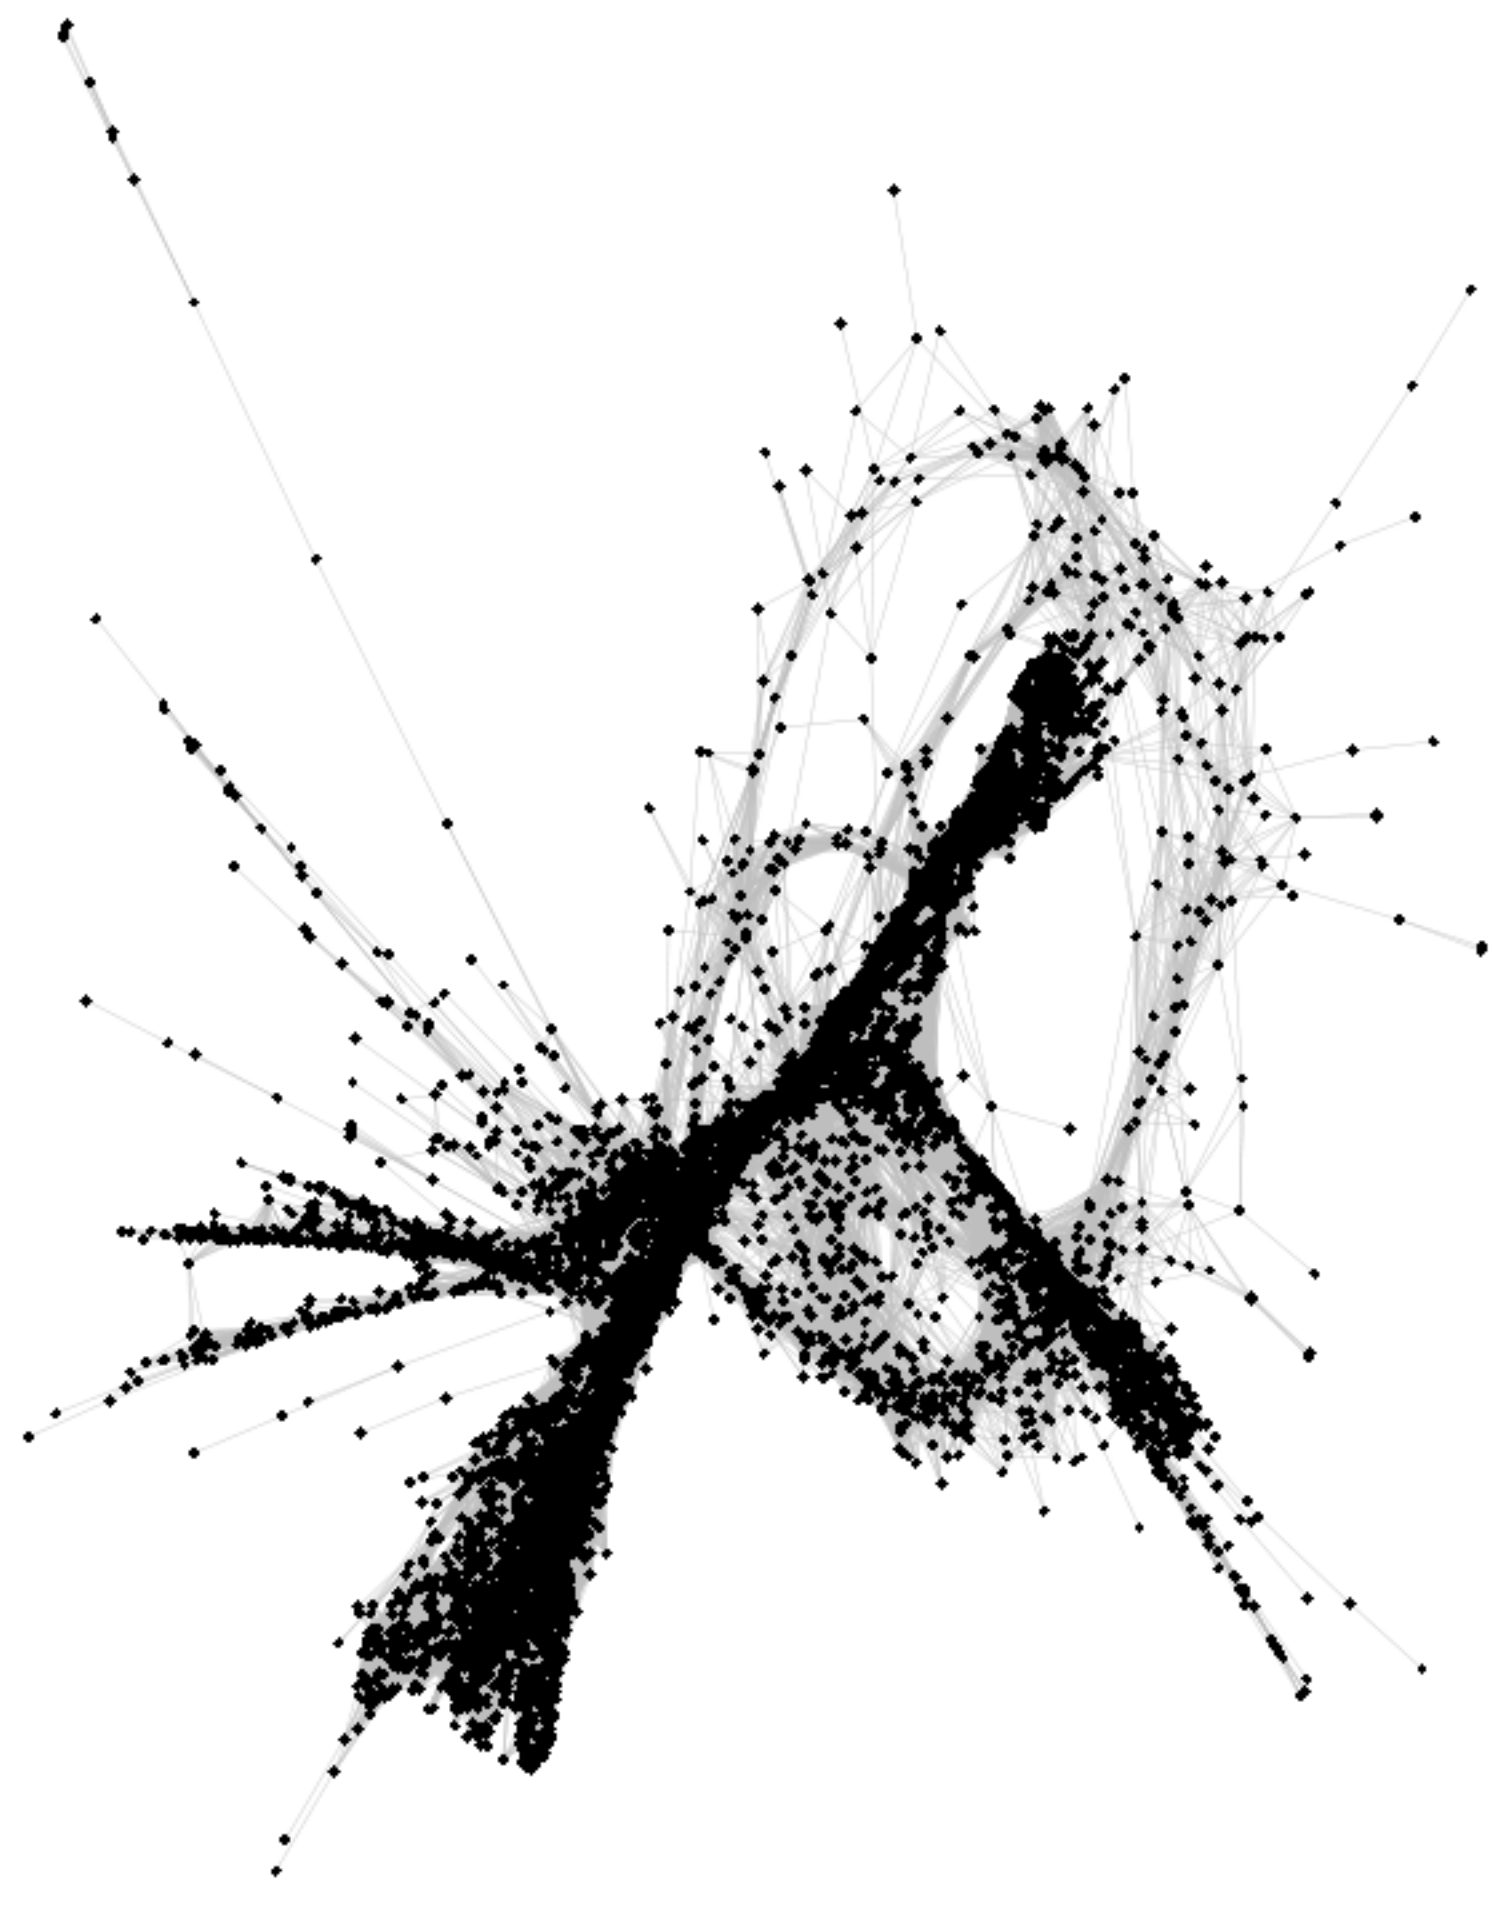

**CL14**

Number of reads: 13337  
 Number of pairs: 2885807  
 Density: 0.03245  
 Diameter: NA  
 Mean edge weight: 159.1  
 Max. degree: 1309

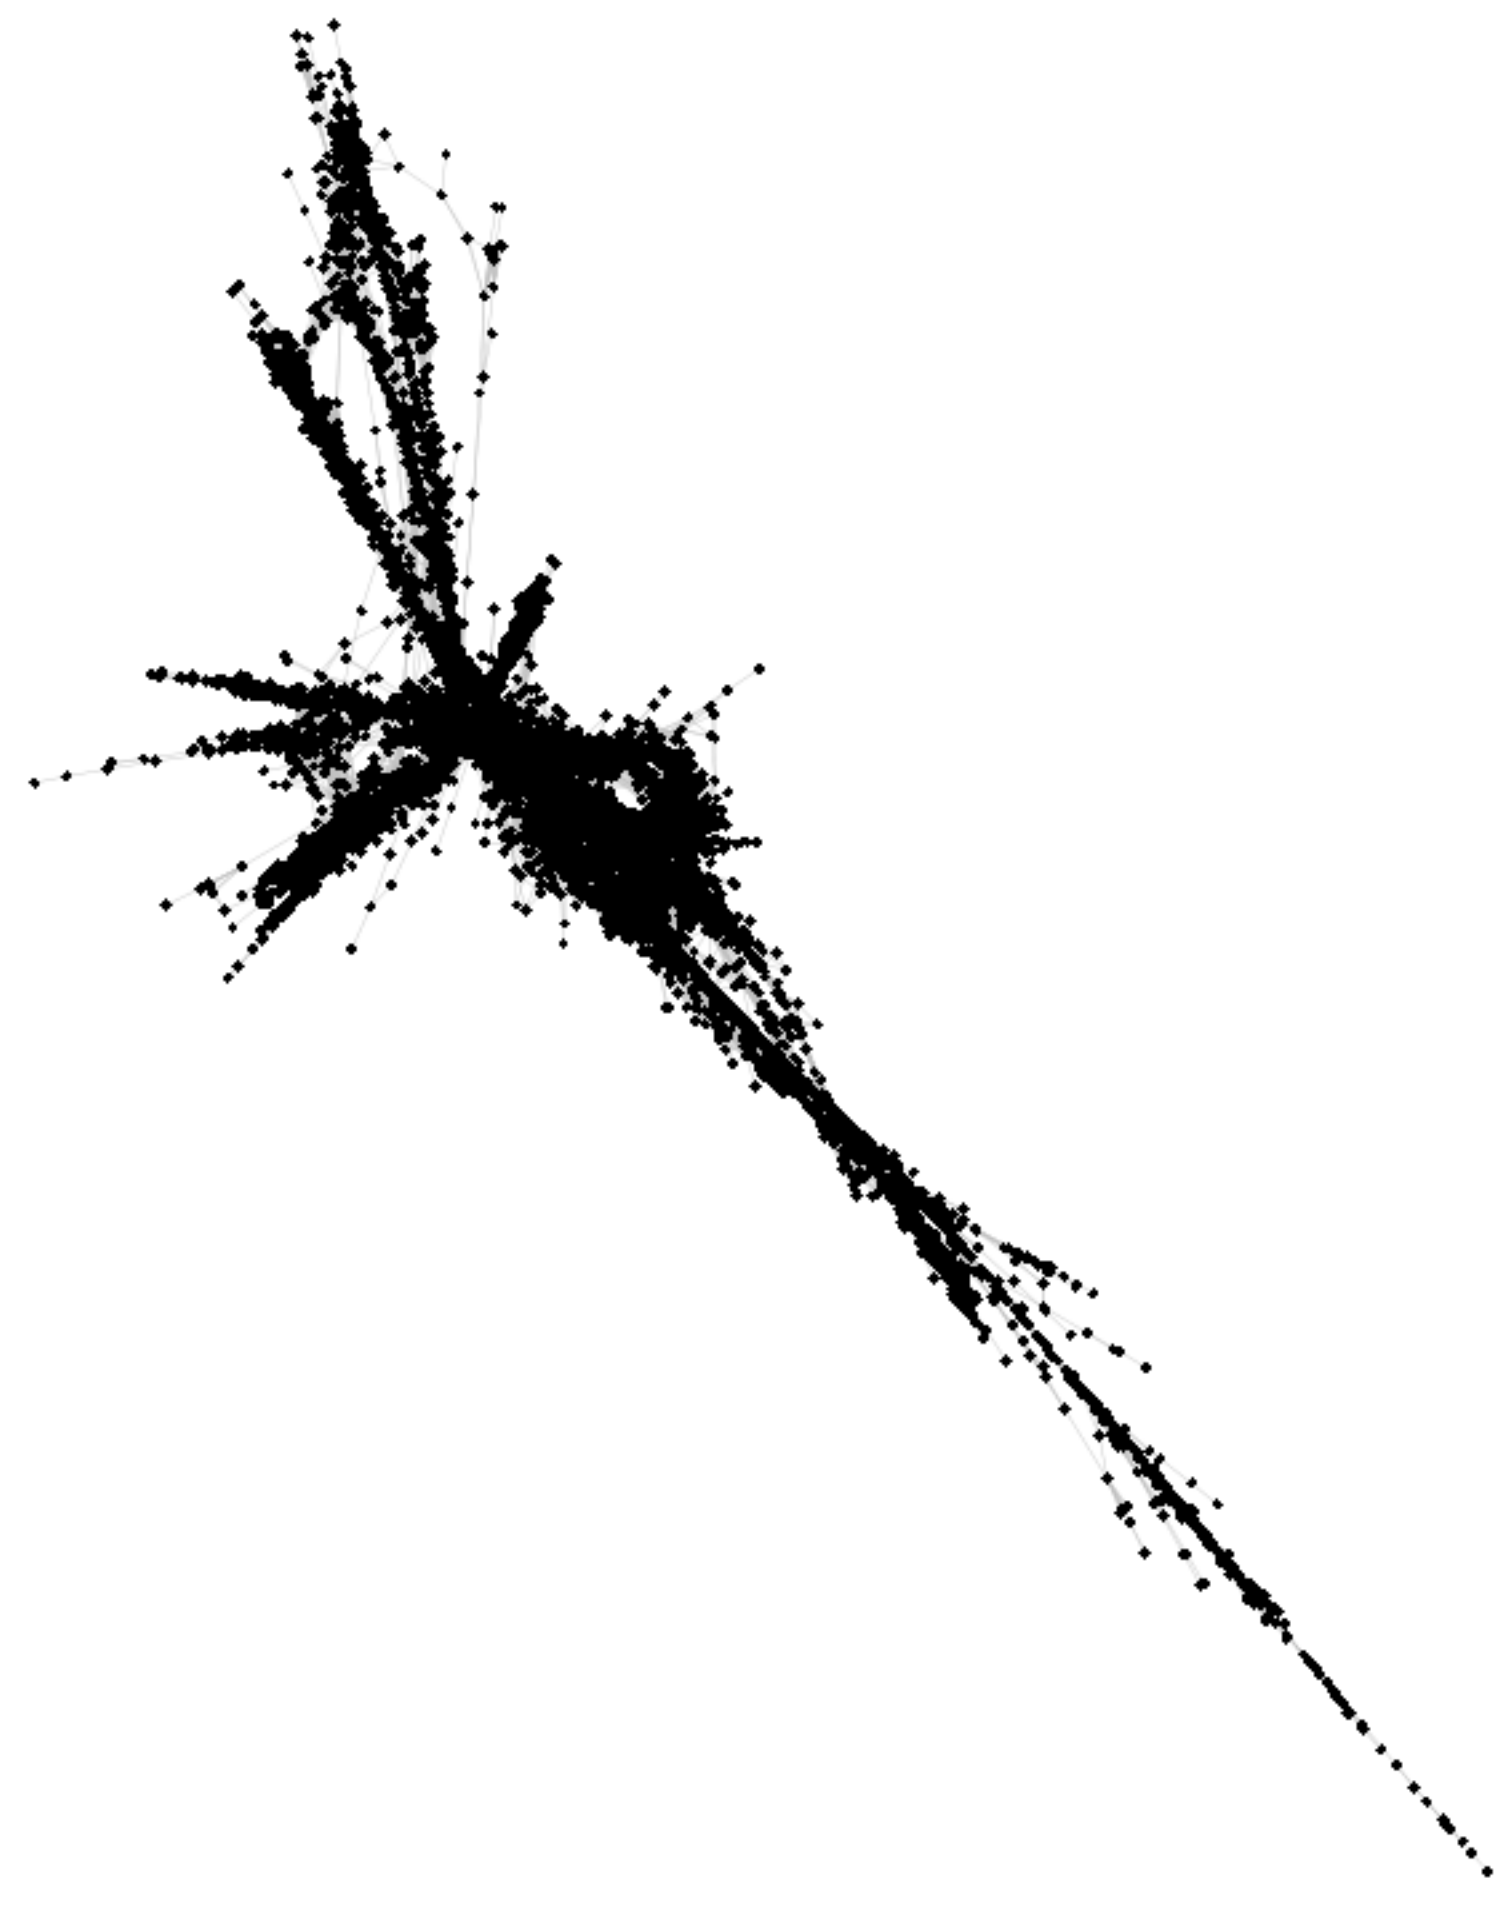

**CL15**

Number of reads: 13075  
 Number of pairs: 684315  
 Density: 0.008006  
 Diameter: NA  
 Mean edge weight: 154.08  
 Max. degree: 924

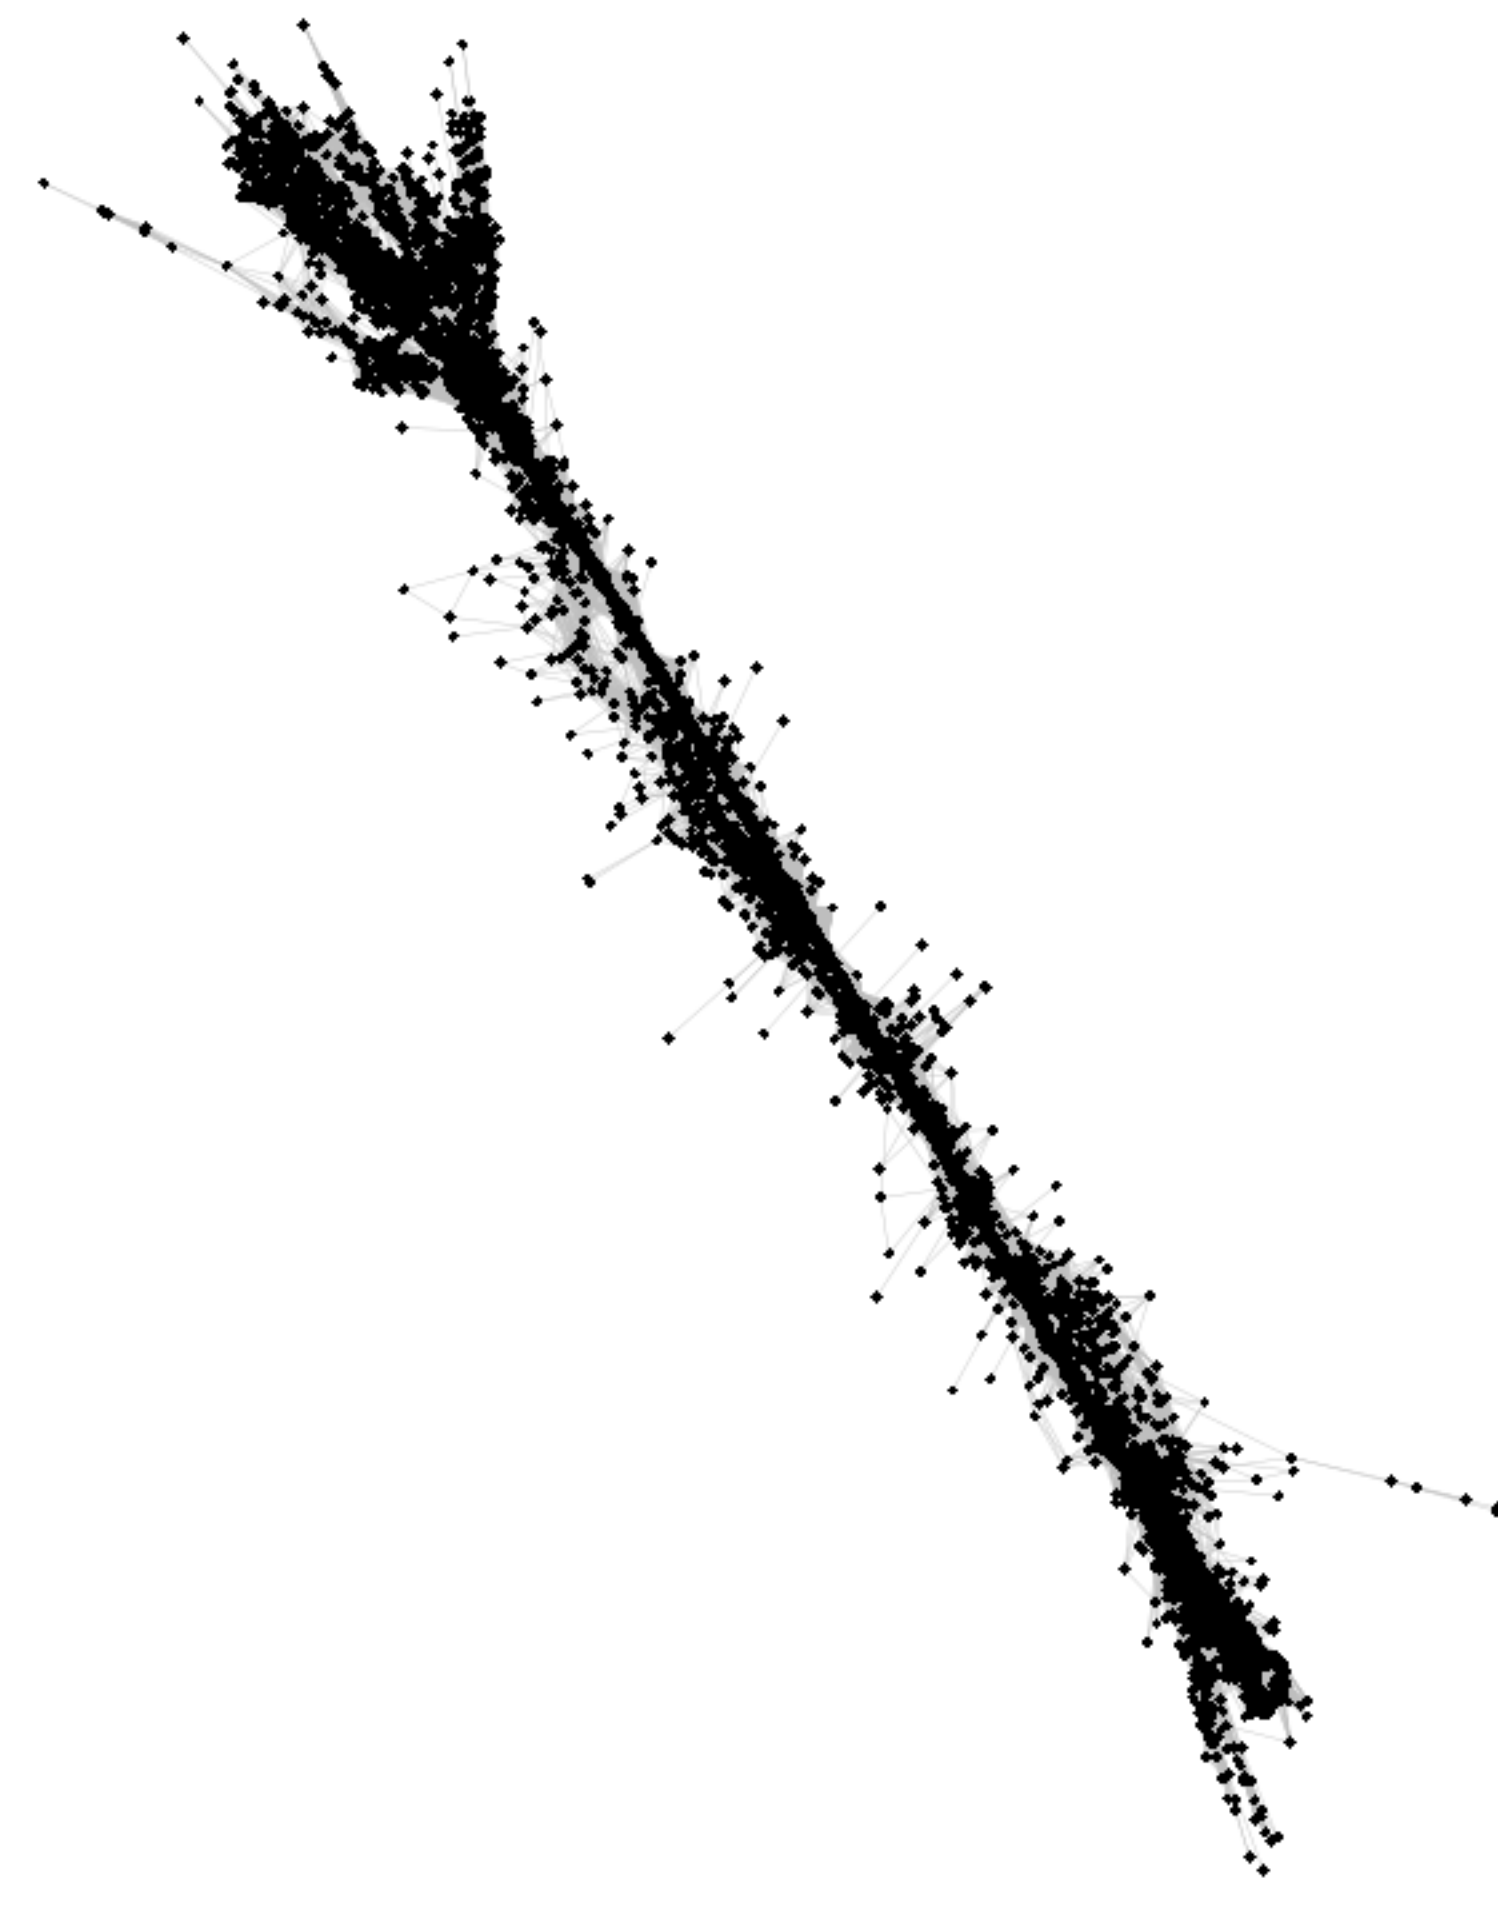

**CL16**

Number of reads: 13027  
 Number of pairs: 3656488  
 Density: 0.0431  
 Diameter: NA  
 Mean edge weight: 166.66  
 Max. degree: 997

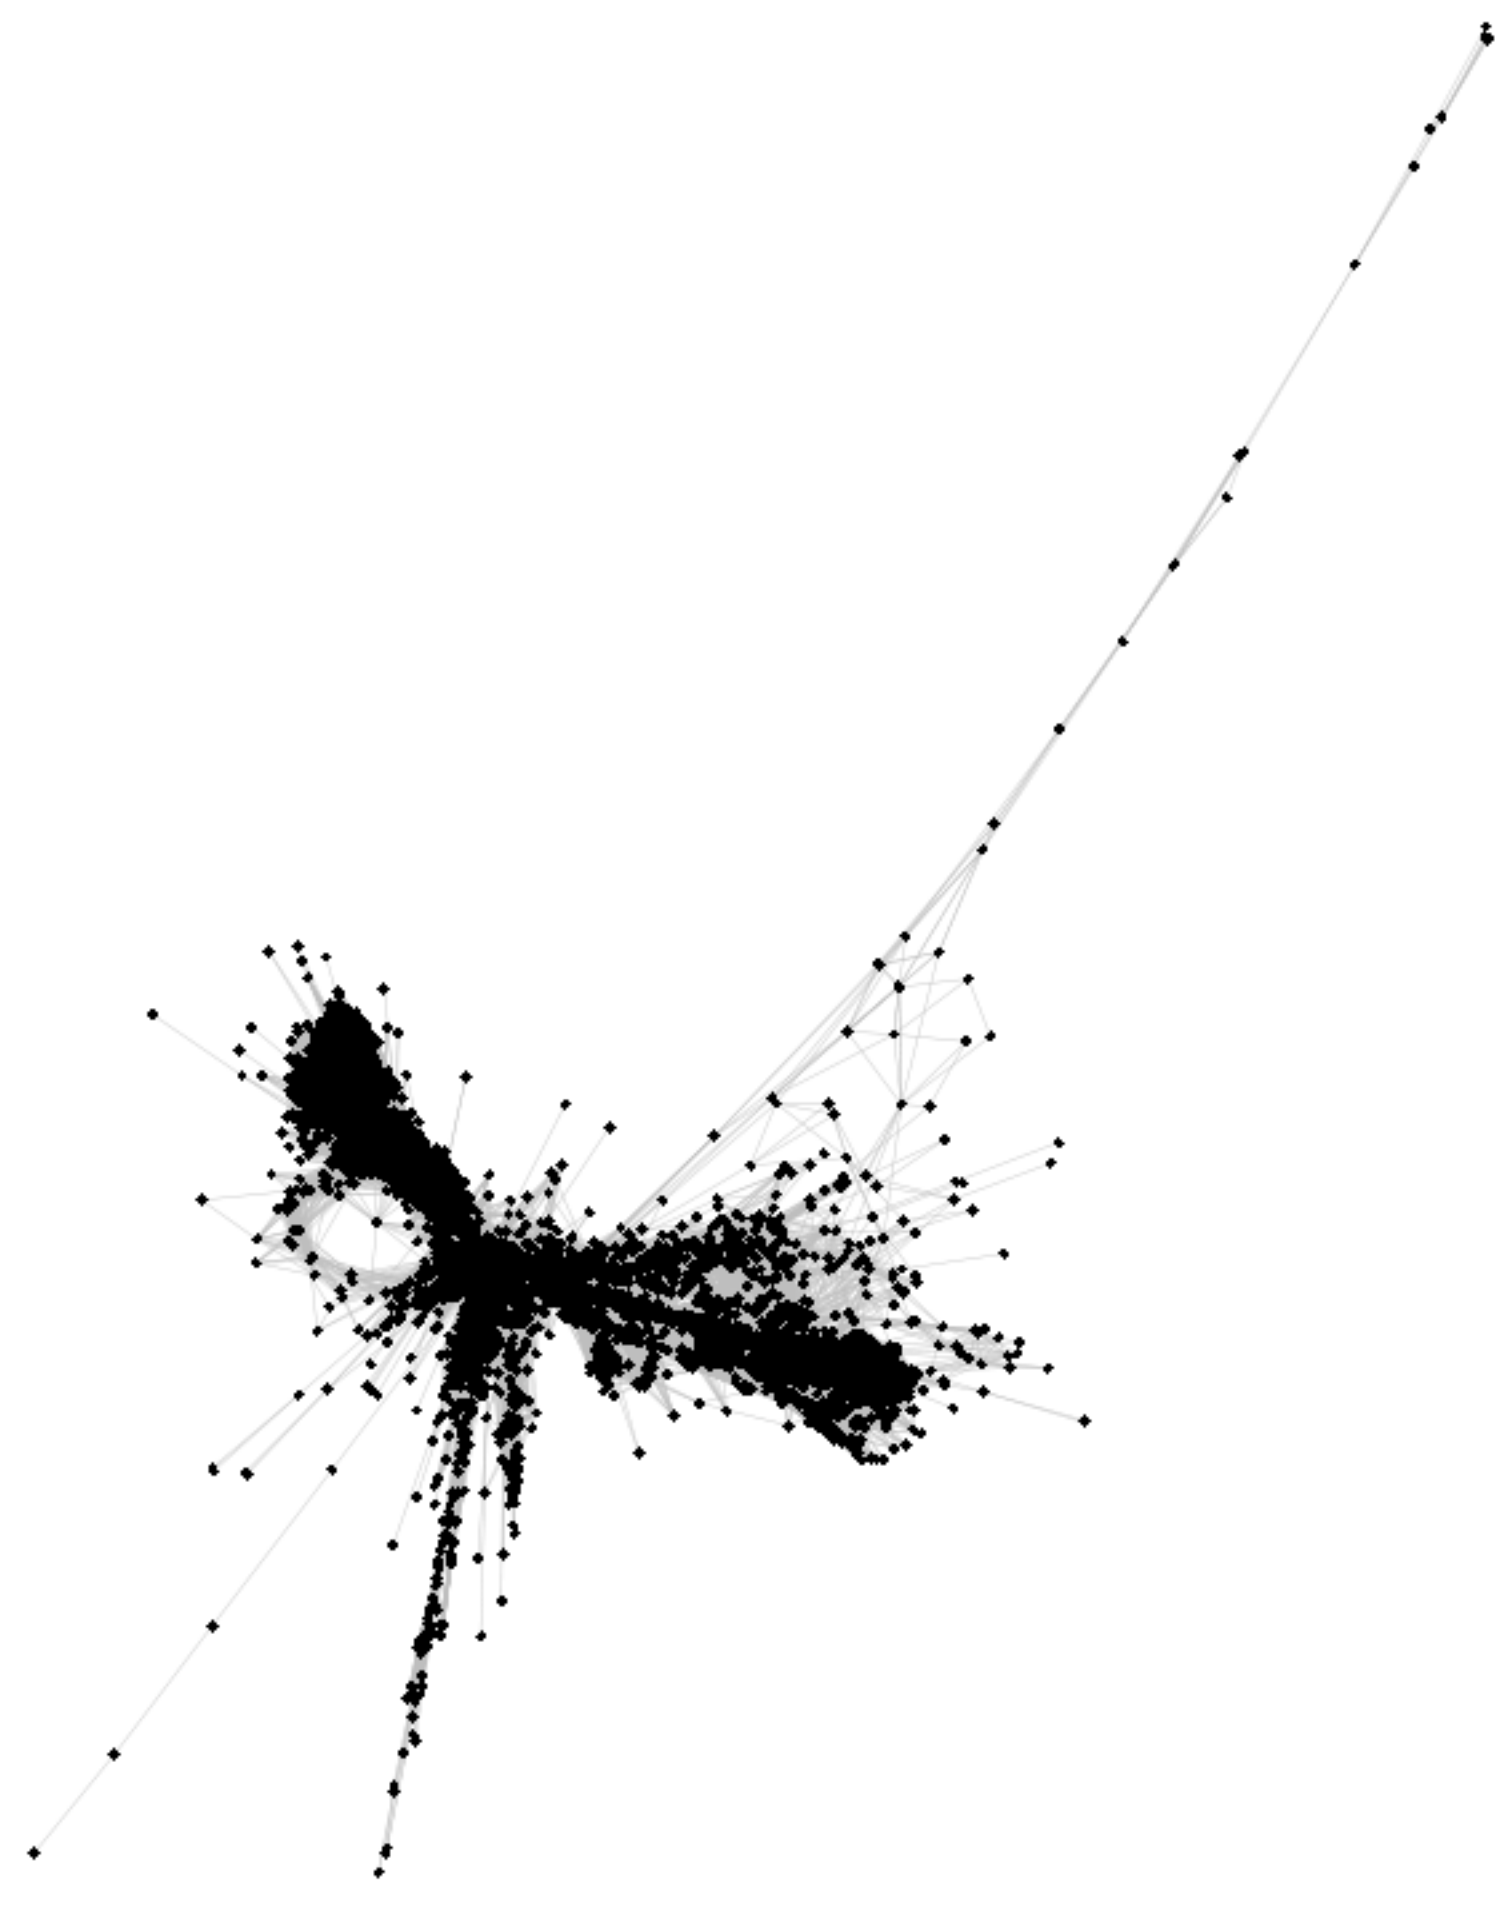

**CL17**

Number of reads: 12920  
 Number of pairs: 6162919  
 Density: 0.07385  
 Diameter: NA  
 Mean edge weight: 160.09  
 Max. degree: 2590

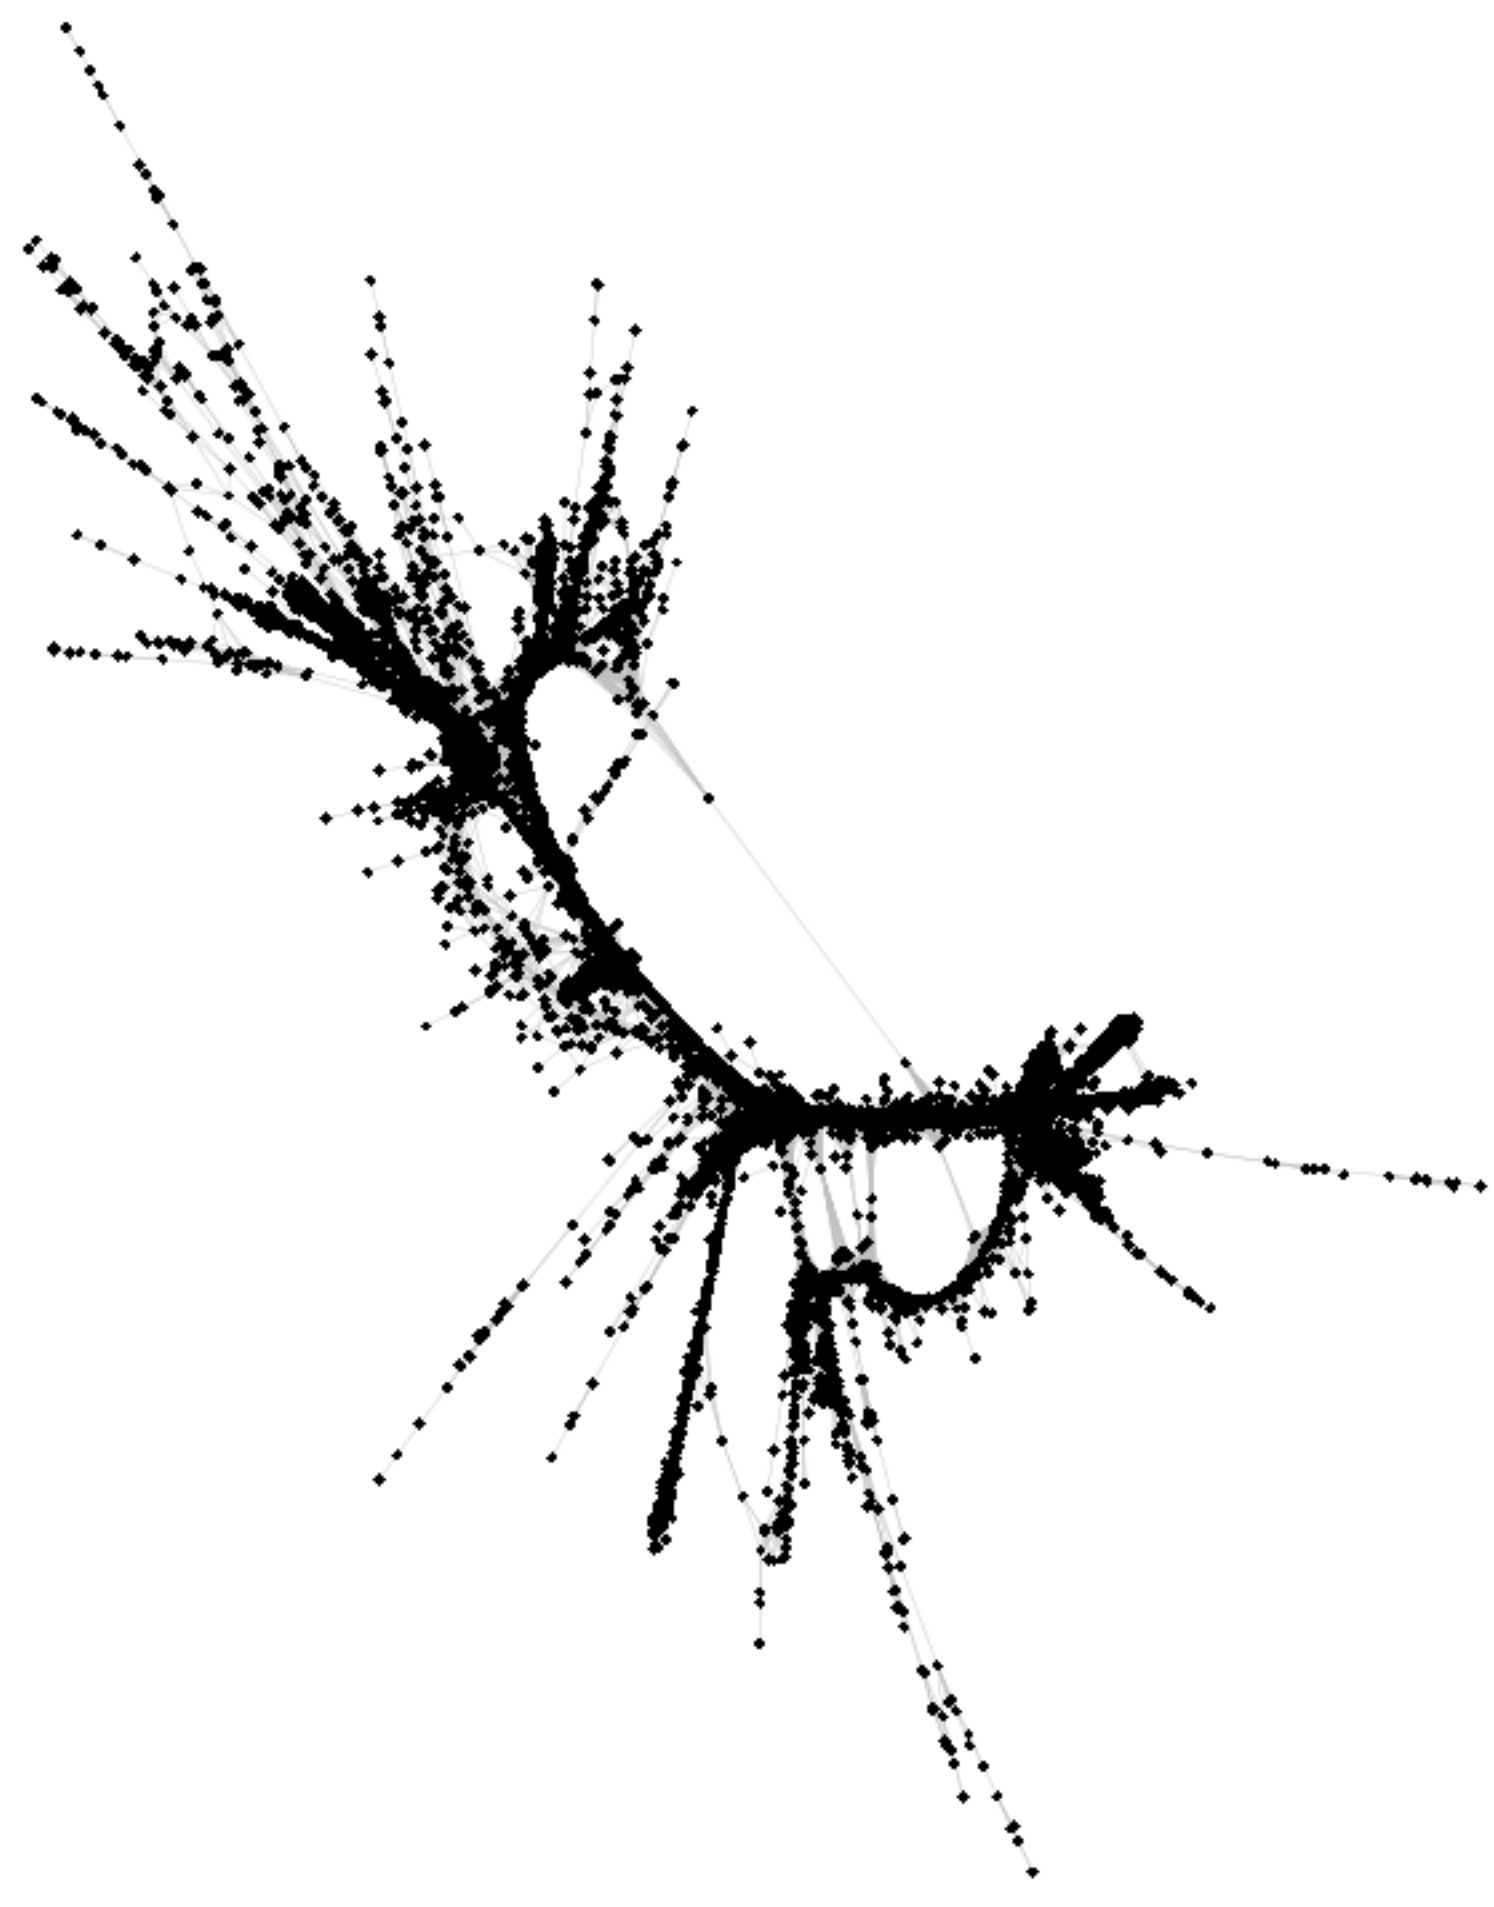

**CL18**

Number of reads: 12557  
 Number of pairs: 1010630  
 Density: 0.01282  
 Diameter: NA  
 Mean edge weight: 156.53  
 Max. degree: 828

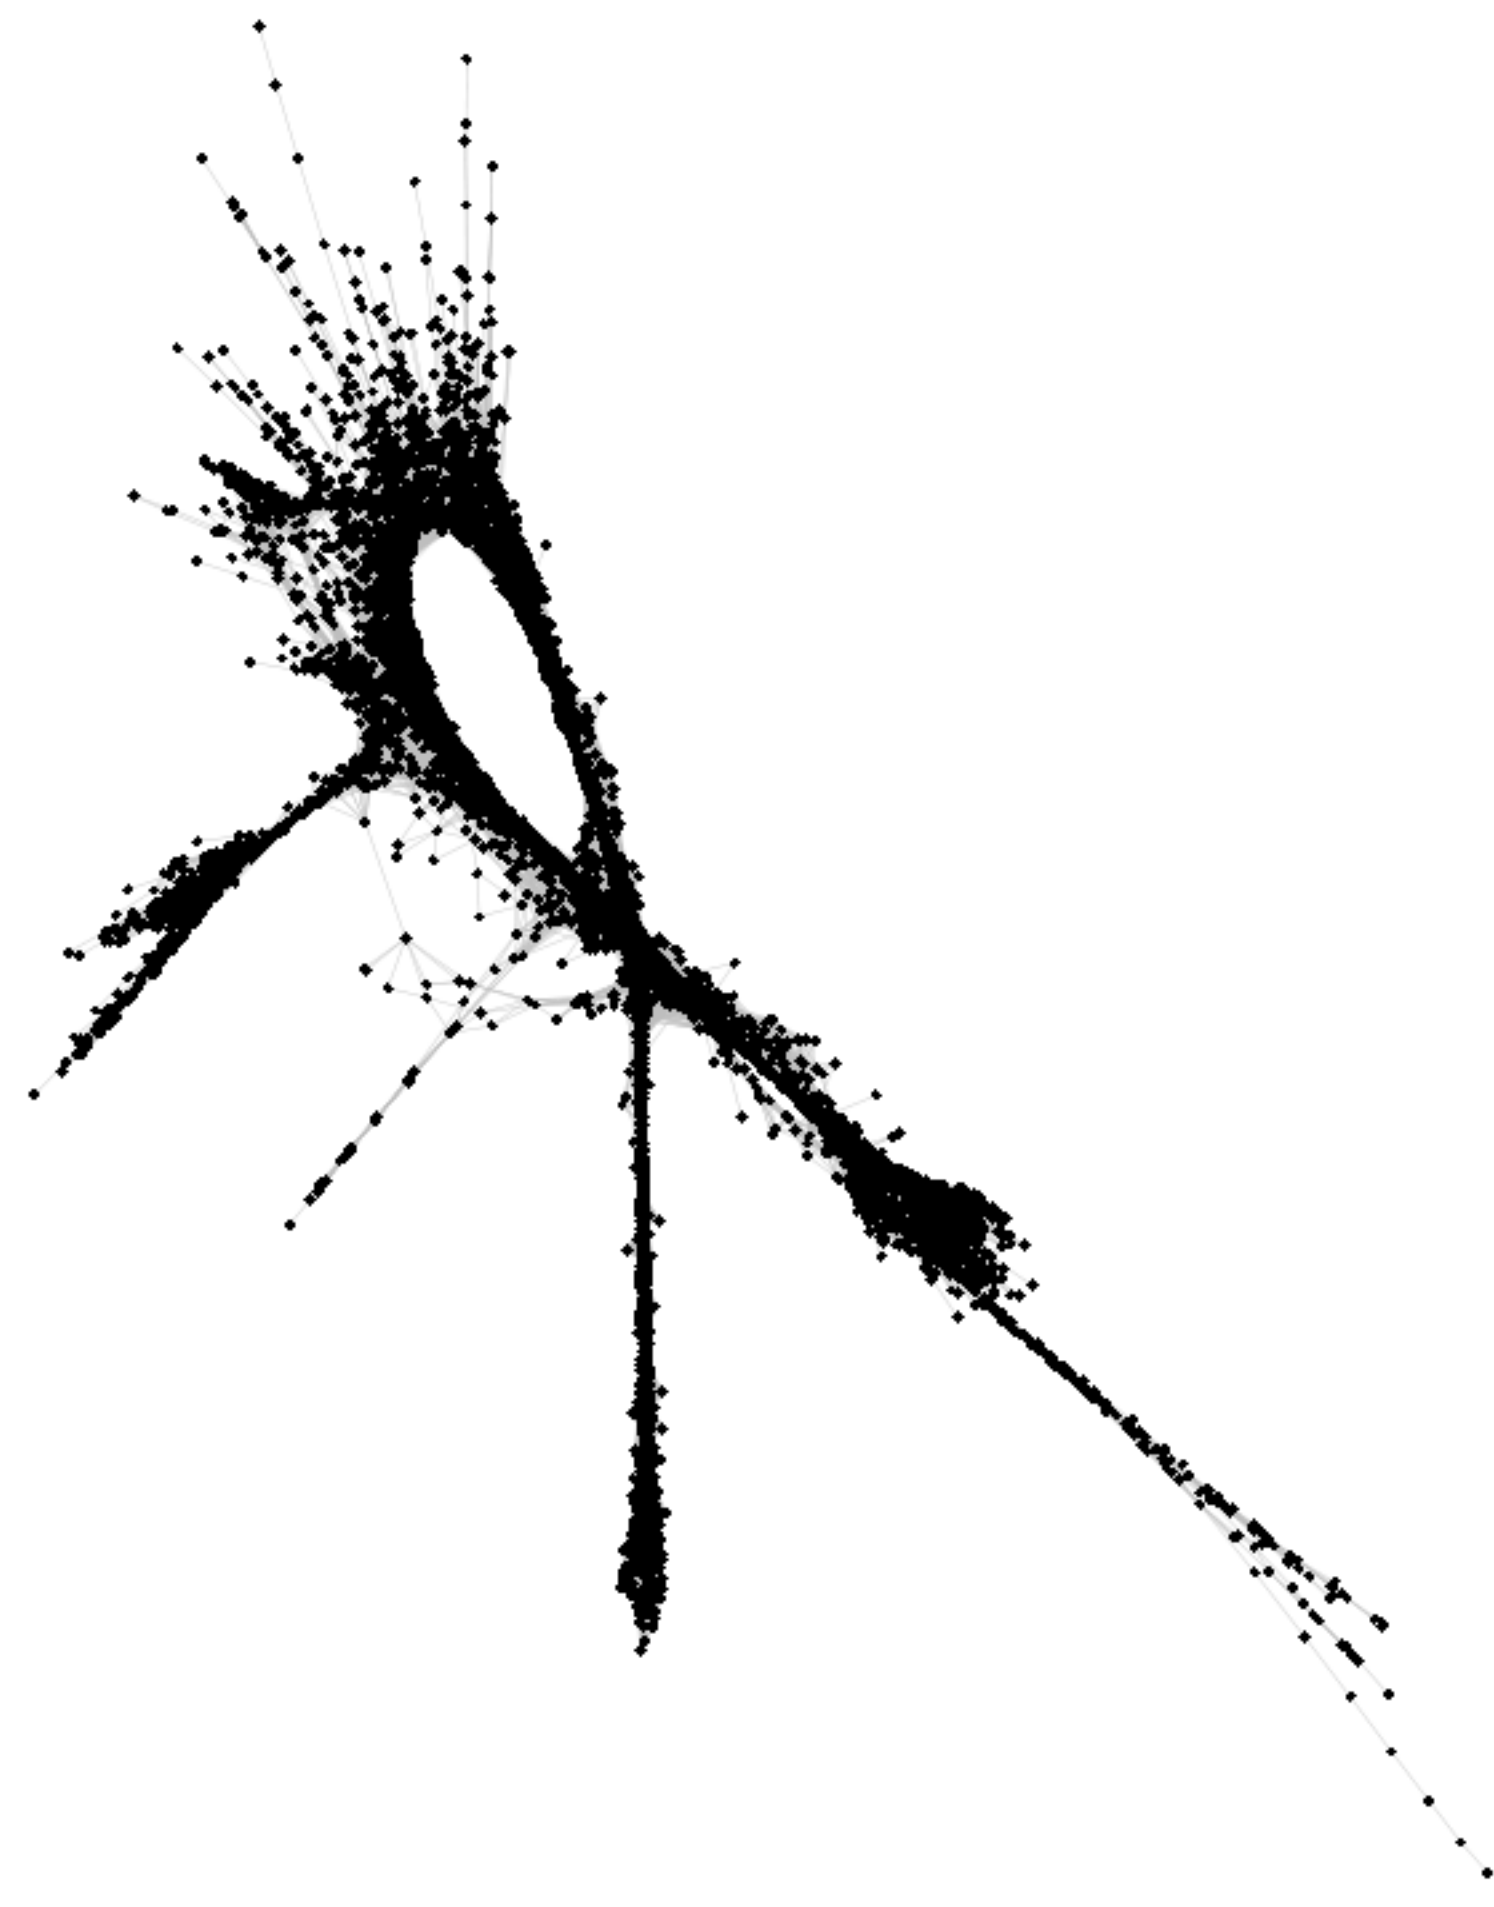

**CL19**

Number of reads: 12389  
 Number of pairs: 1164245  
 Density: 0.01517  
 Diameter: NA  
 Mean edge weight: 159.14  
 Max. degree: 722

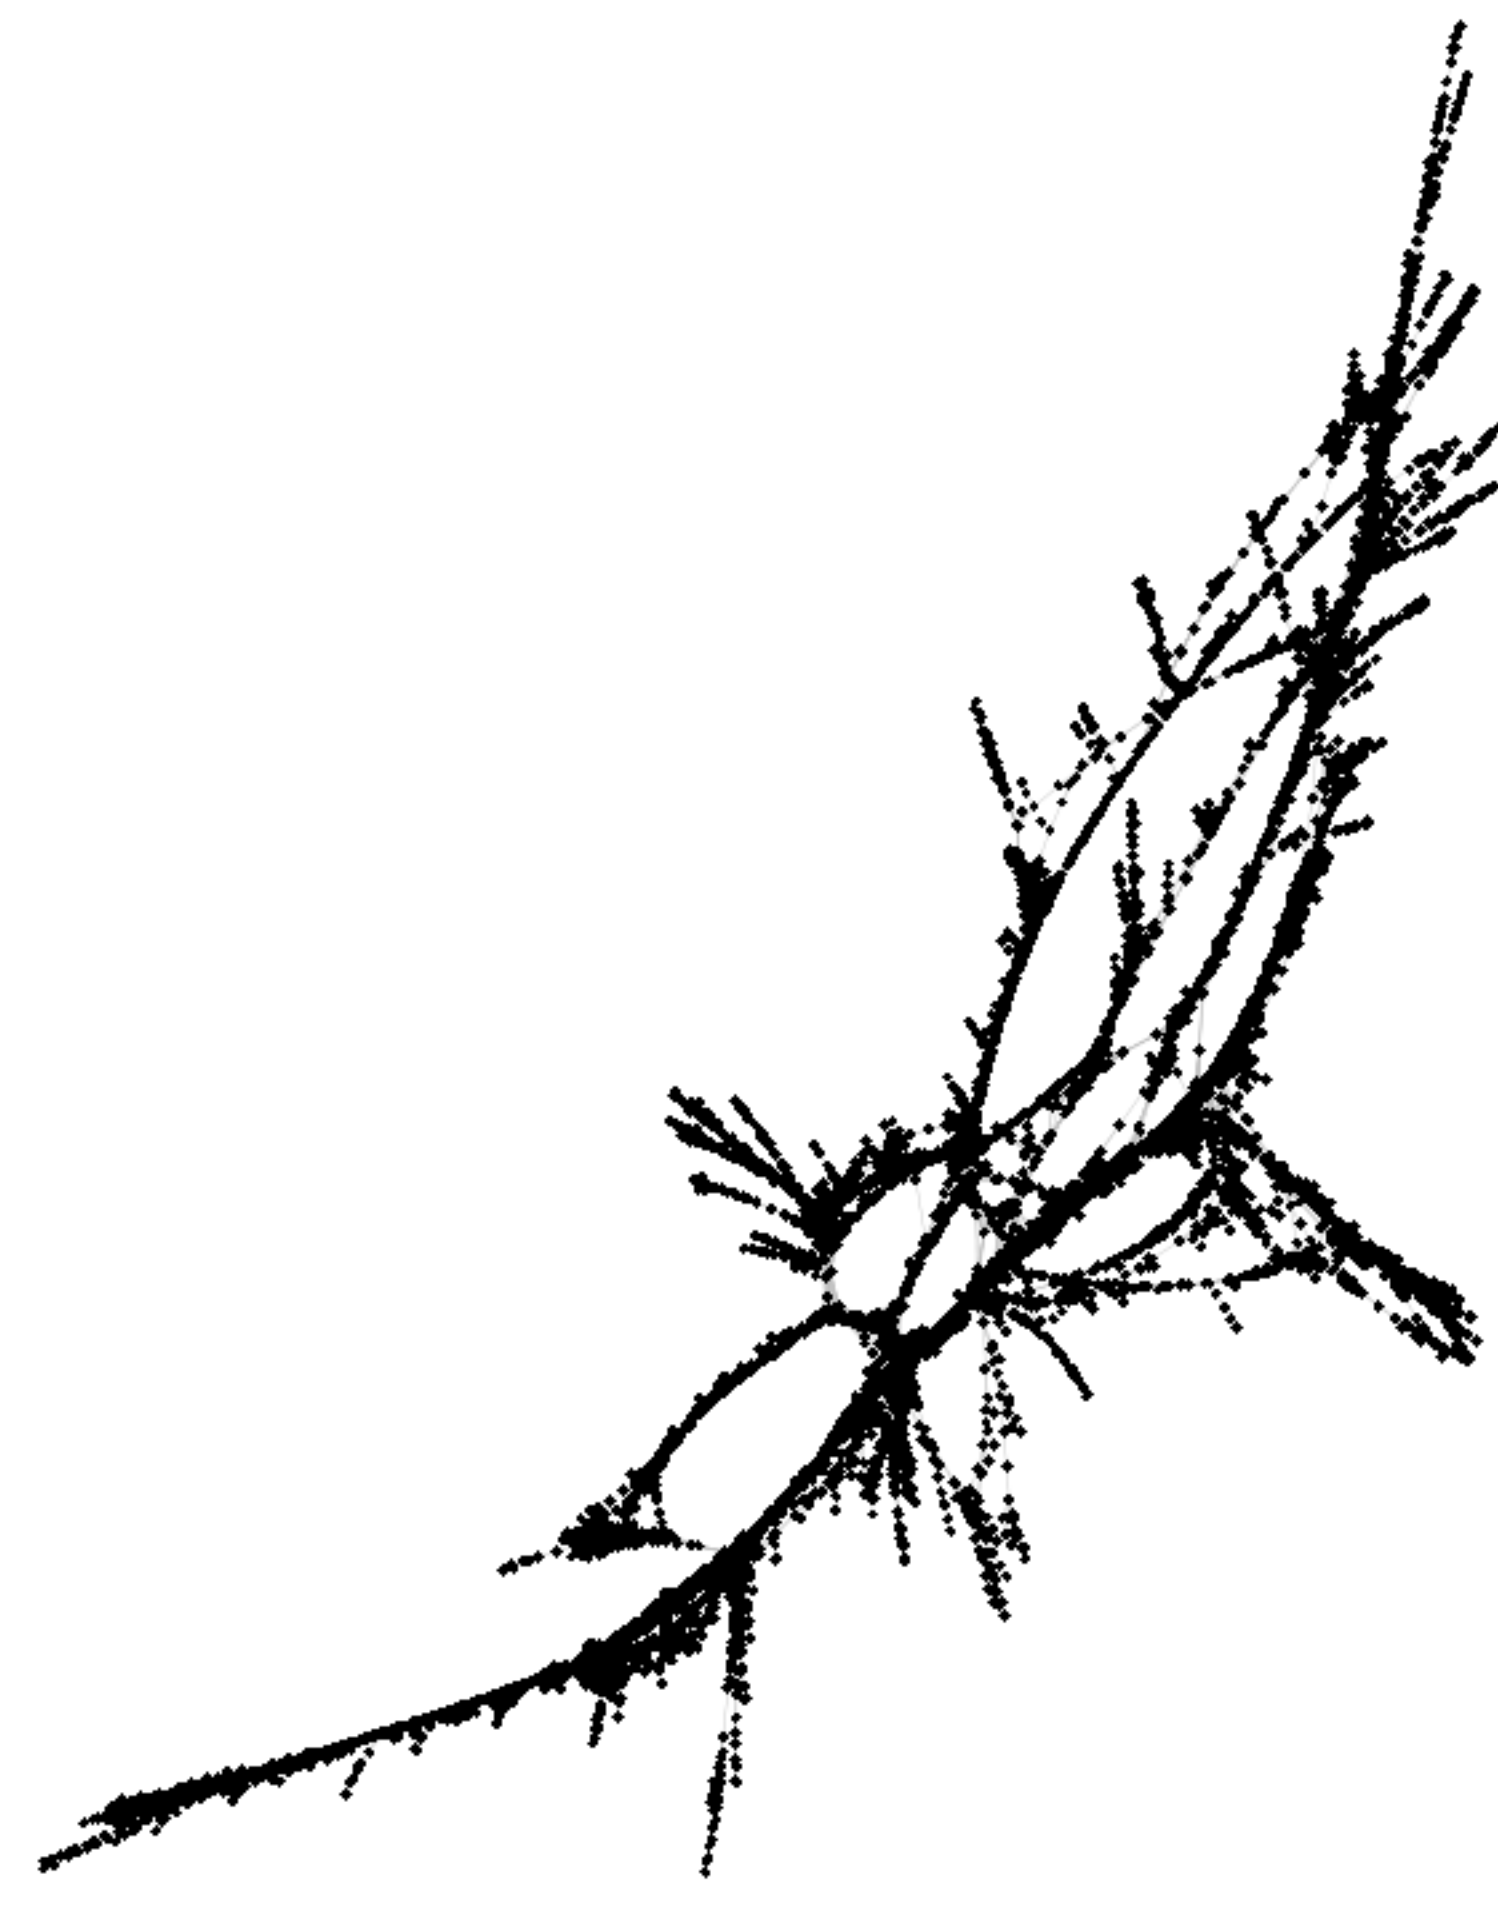

**CL20**

Number of reads: 12258  
 Number of pairs: 208028  
 Density: 0.002769  
 Diameter: NA  
 Mean edge weight: 157.98  
 Max. degree: 216

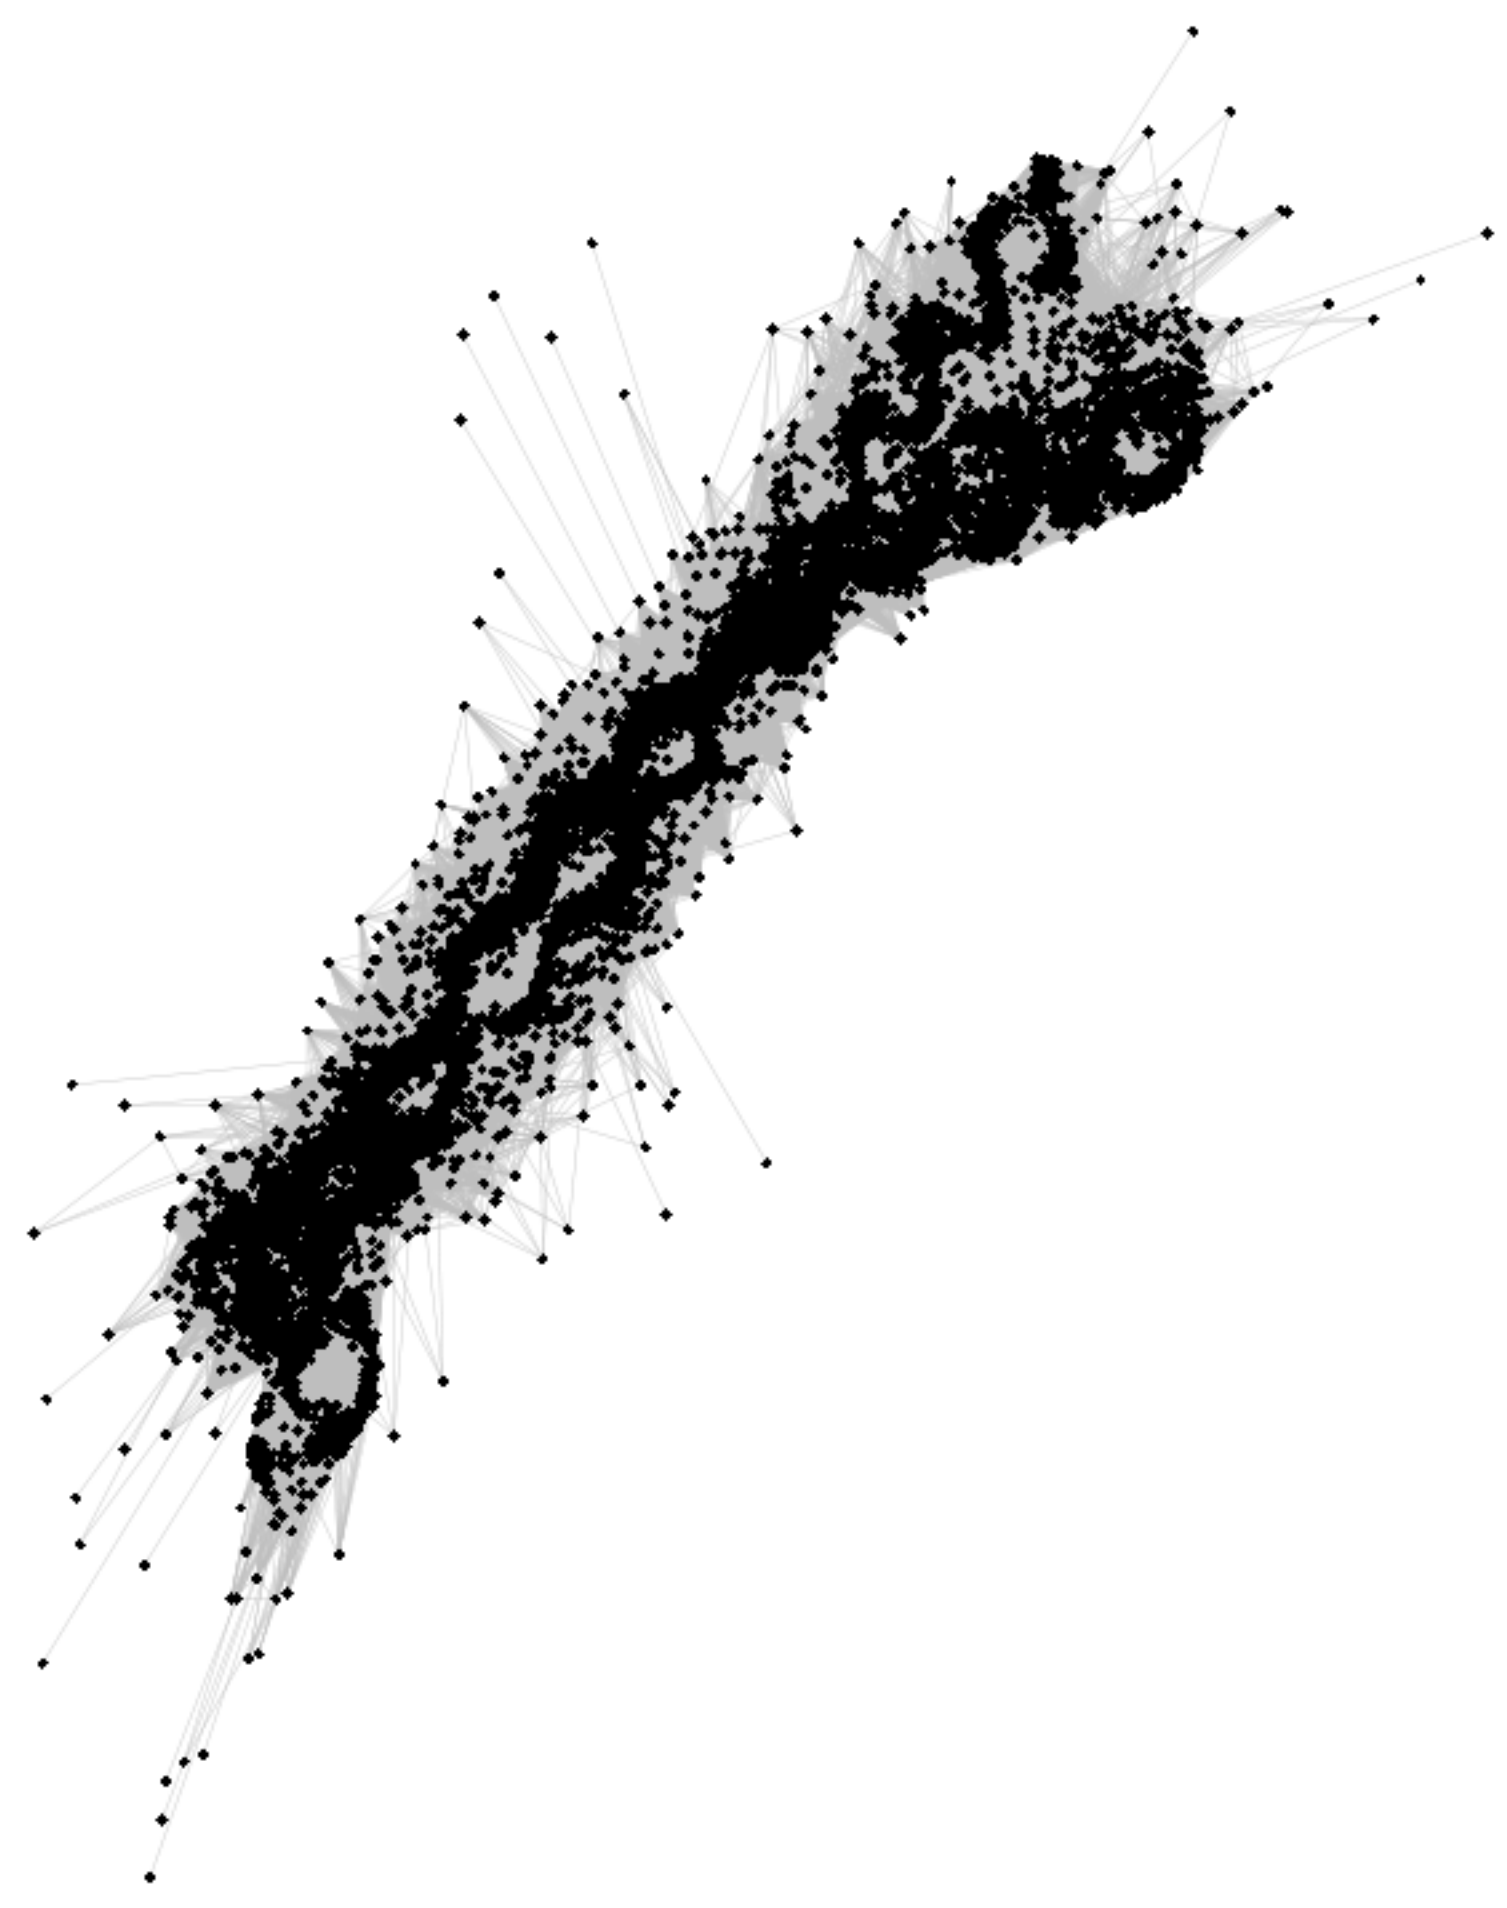

**CL21**

Number of reads: 12236  
 Number of pairs: 5608820  
 Density: 0.07493  
 Diameter: NA  
 Mean edge weight: 166.68  
 Max. degree: 2353

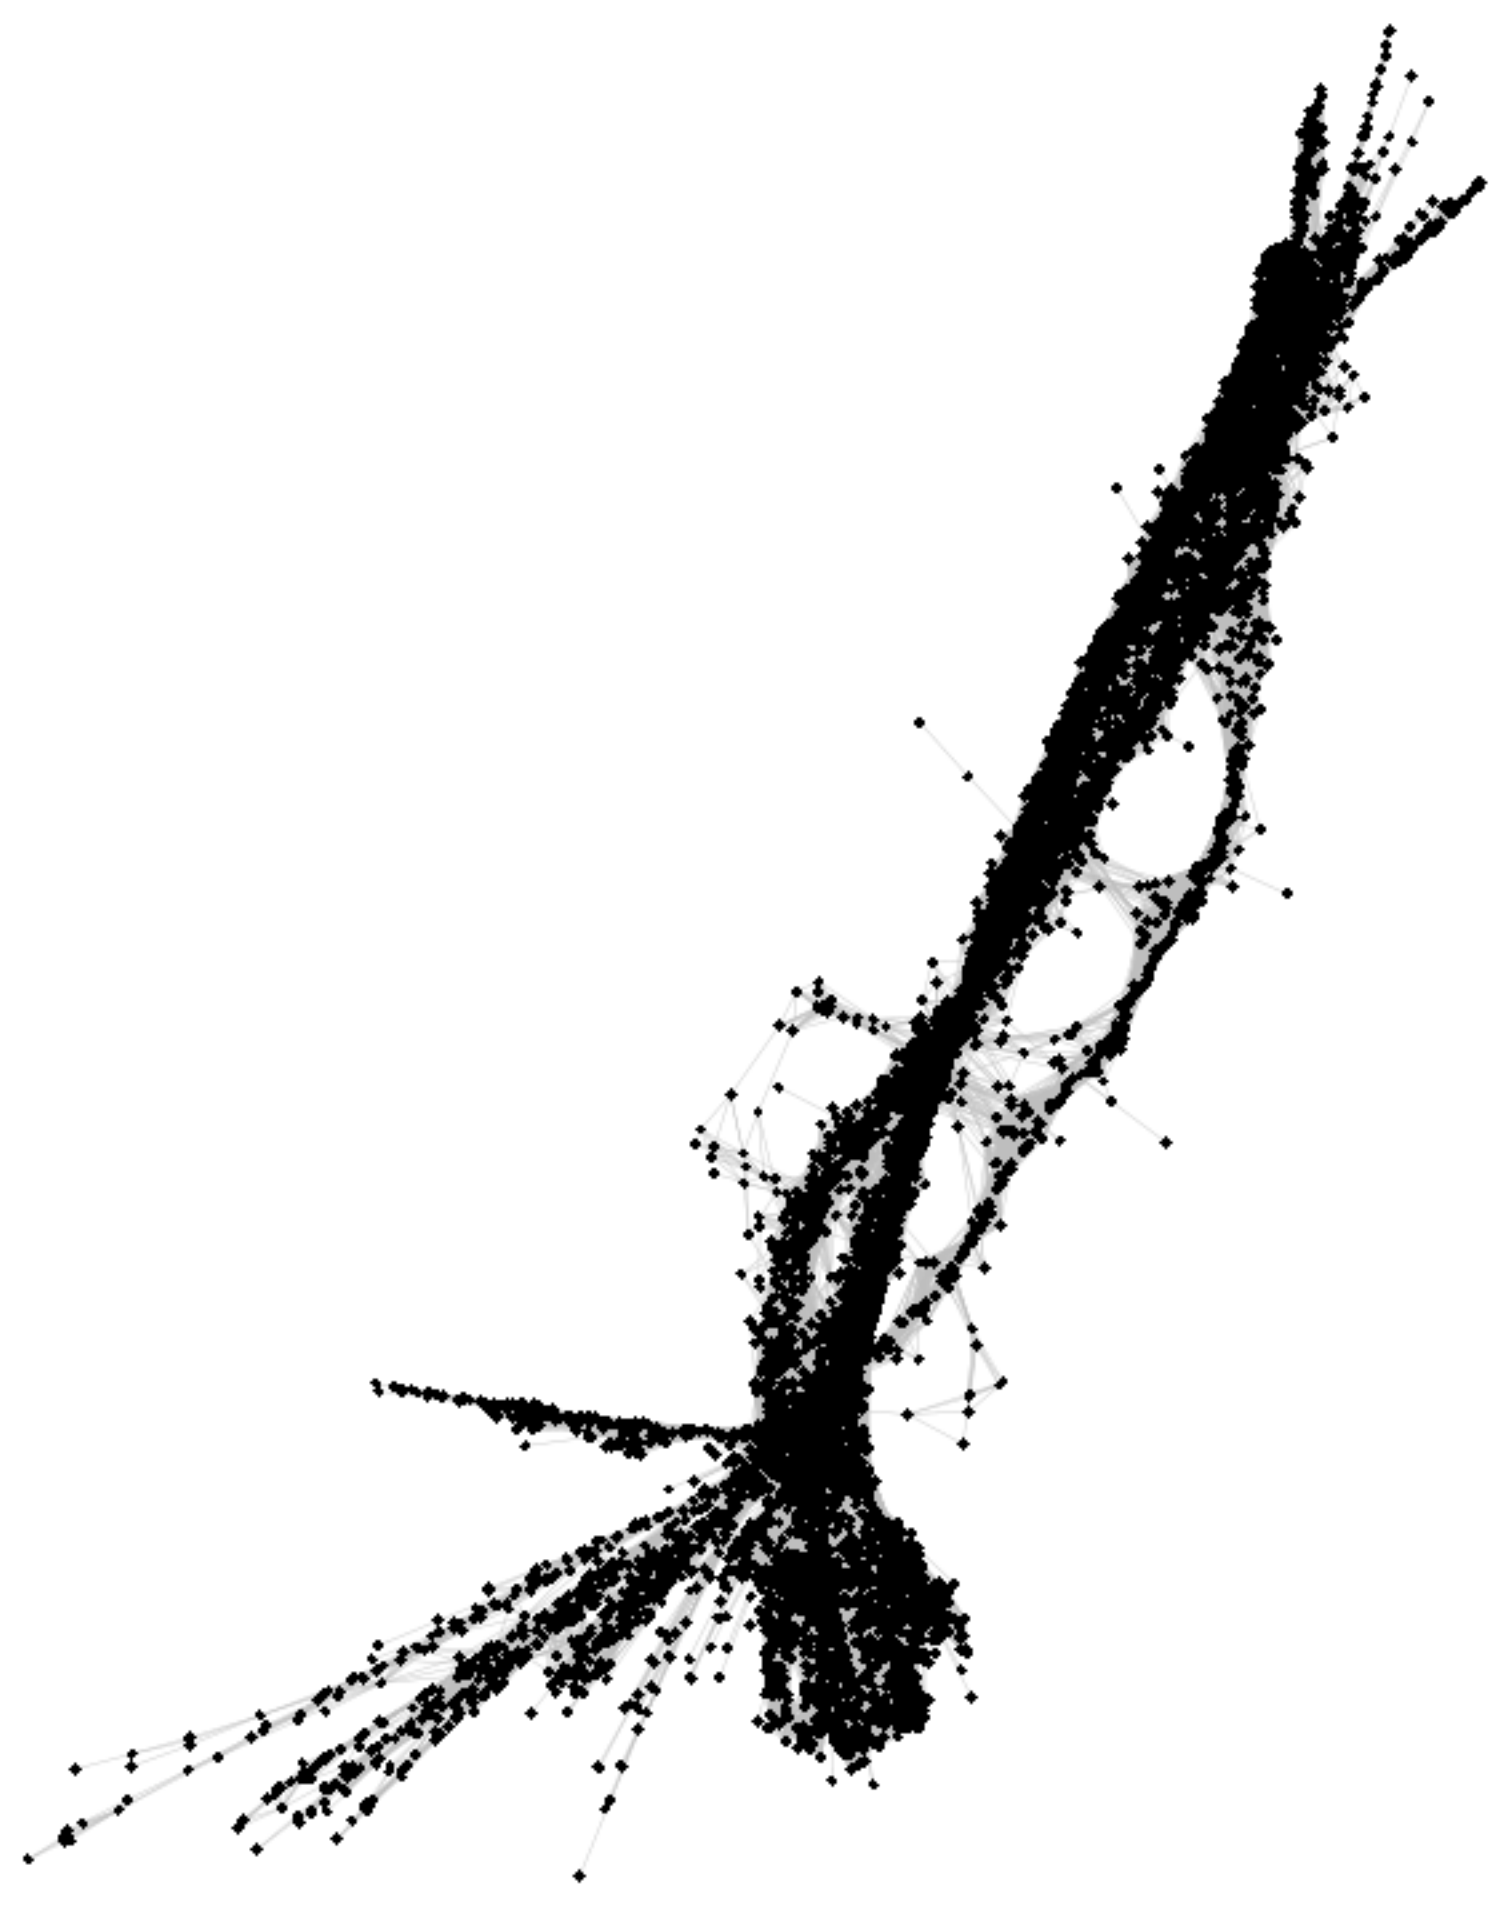

**CL22**

Number of reads: 12088  
 Number of pairs: 923764  
 Density: 0.01264  
 Diameter: NA  
 Mean edge weight: 156.78  
 Max. degree: 523

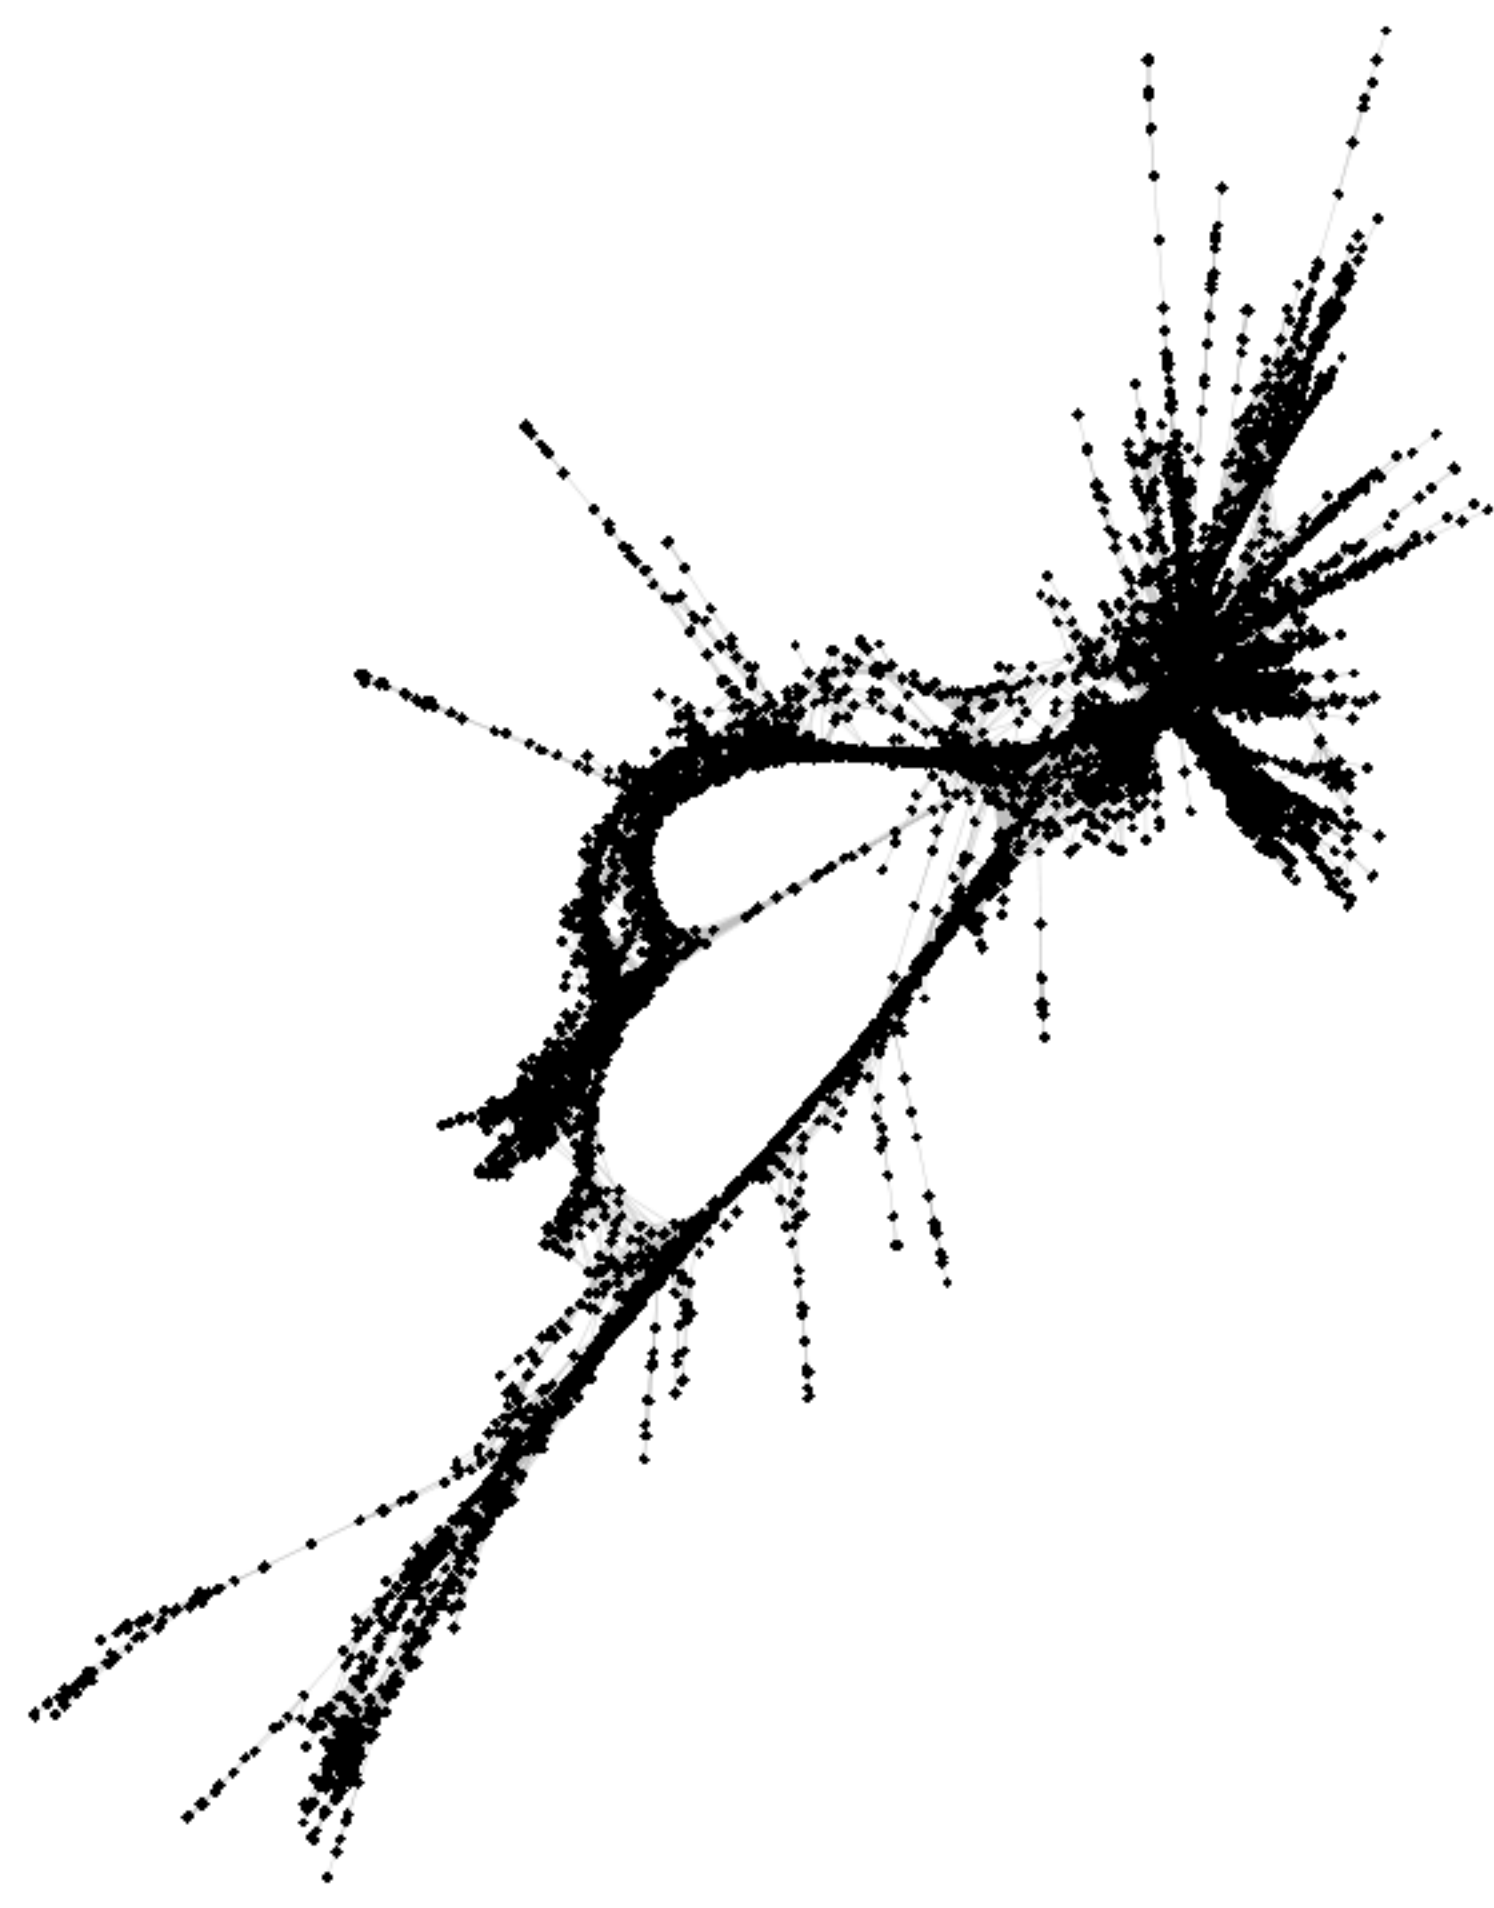

**CL23**

Number of reads: 11711  
 Number of pairs: 432370  
 Density: 0.006306  
 Diameter: NA  
 Mean edge weight: 155.34  
 Max. degree: 612

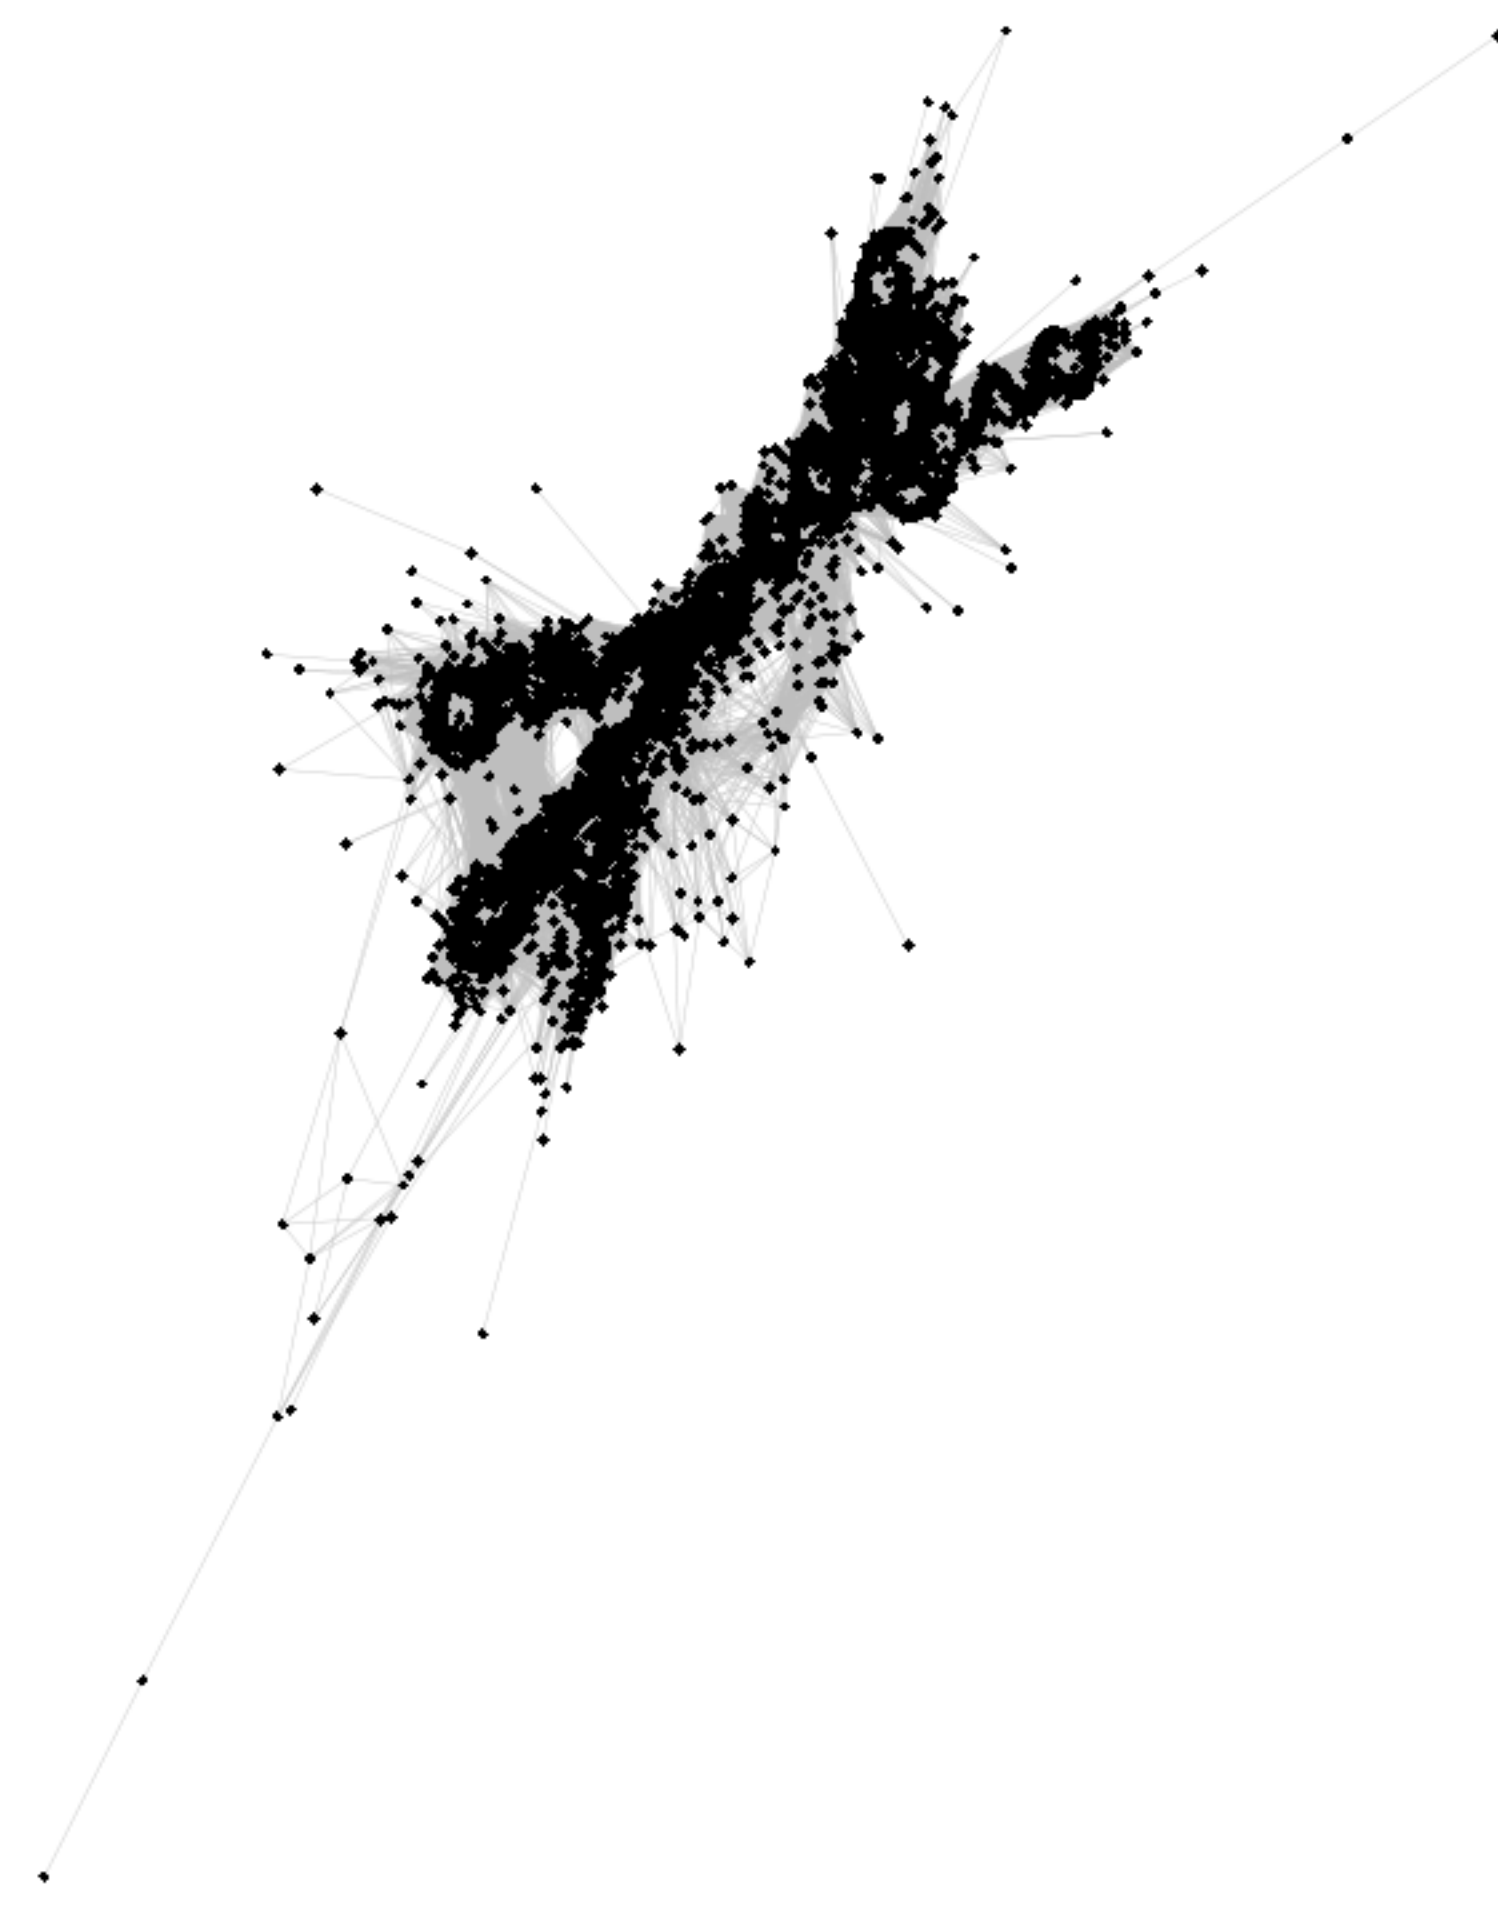

**CL24**

Number of reads: 11697  
 Number of pairs: 5585042  
 Density: 0.08165  
 Diameter: NA  
 Mean edge weight: 166.82  
 Max. degree: 2256

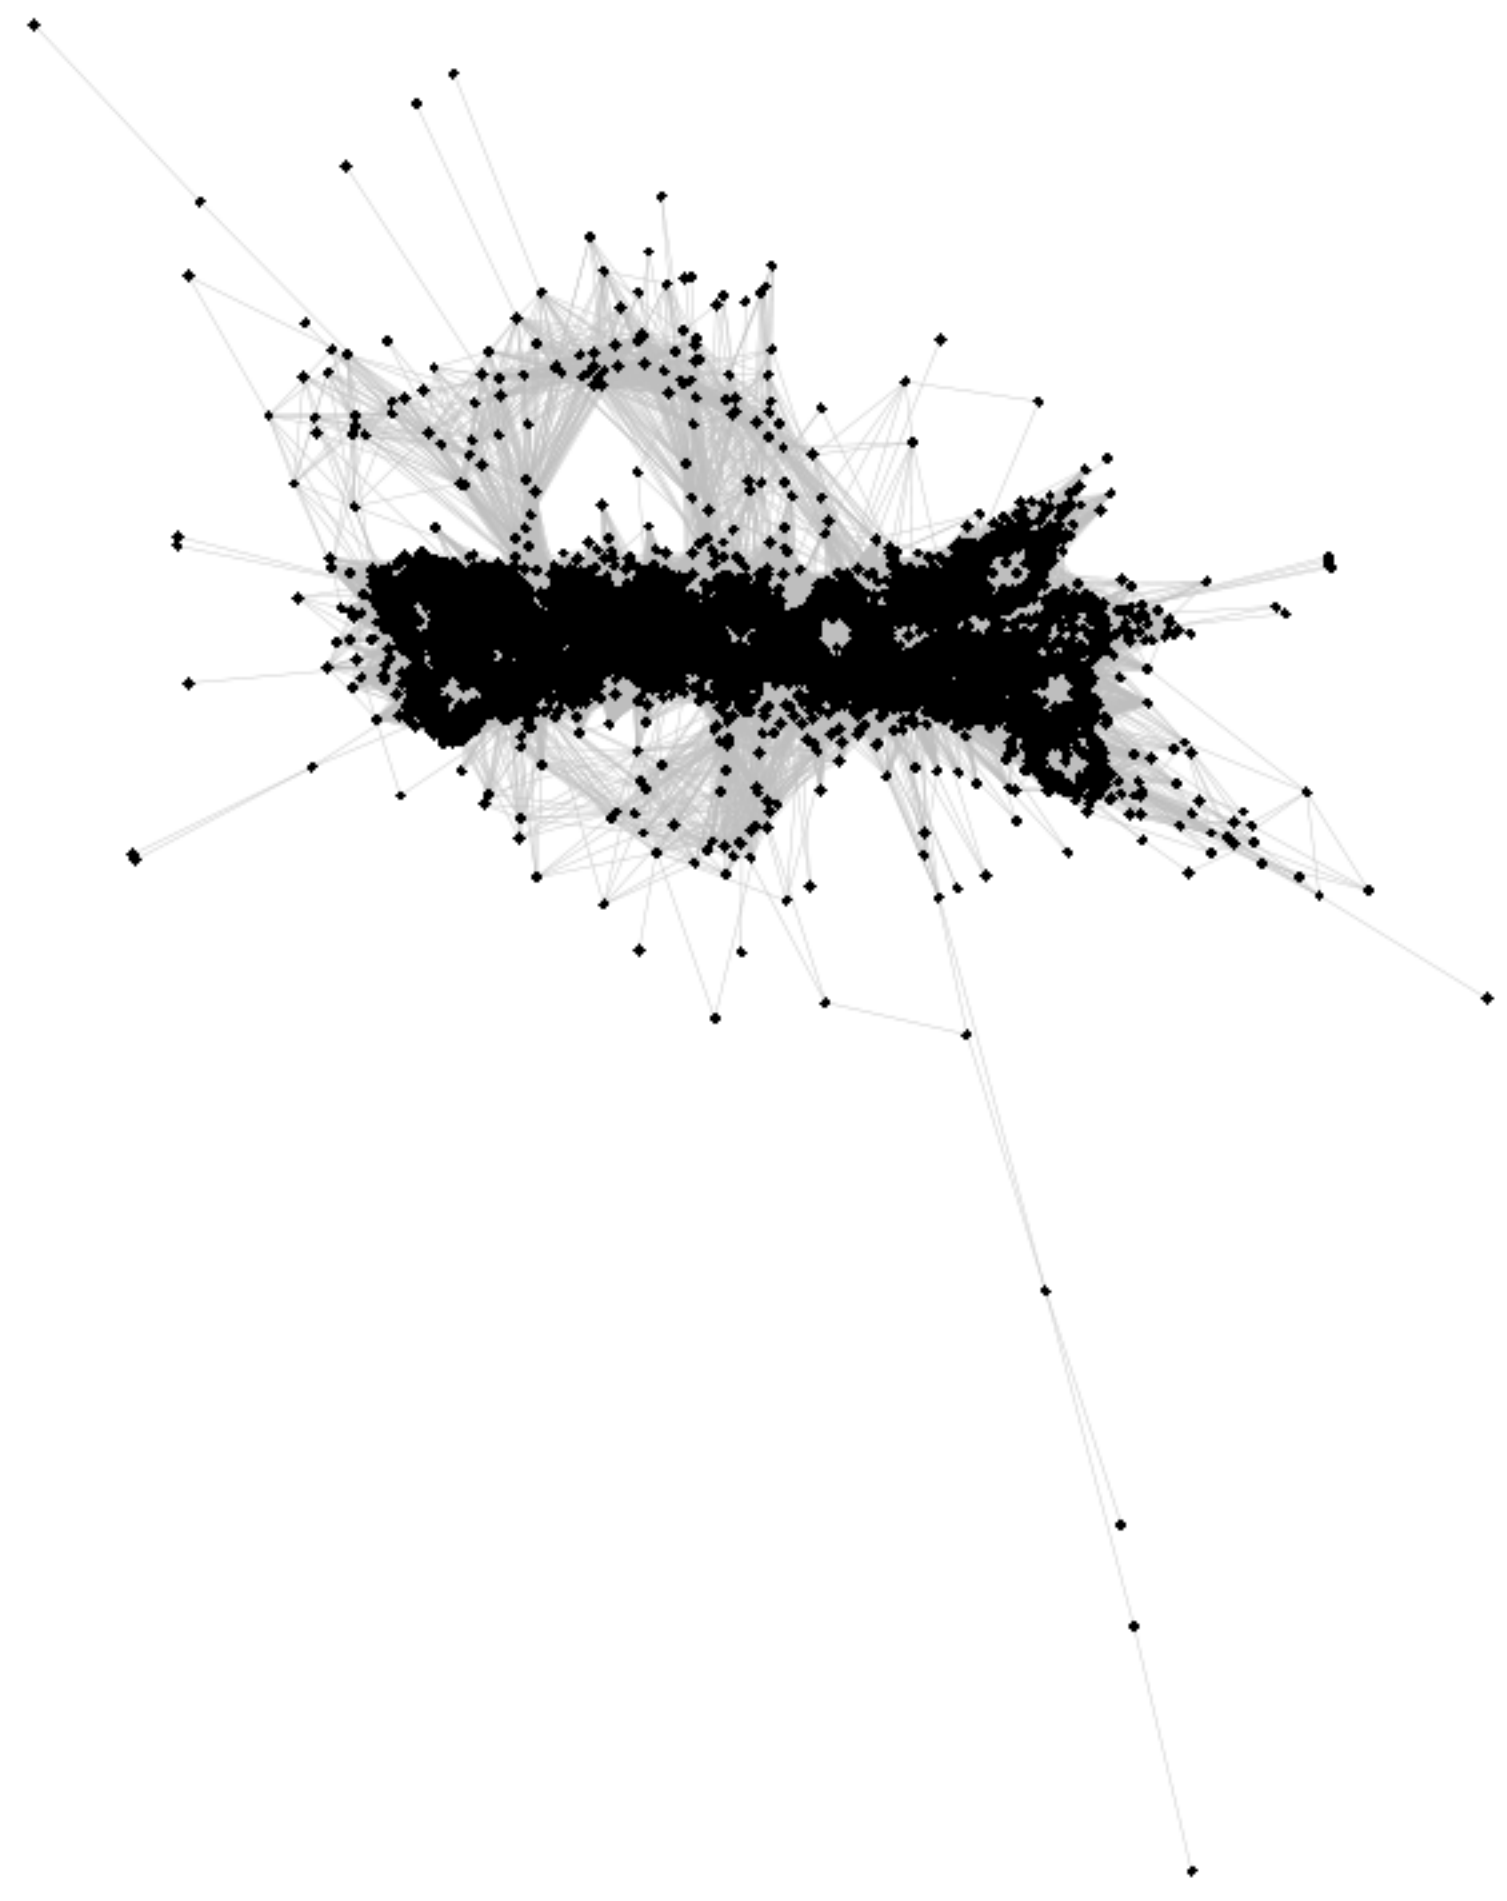

**CL25**

Number of reads: 11651  
 Number of pairs: 6109731  
 Density: 0.09002  
 Diameter: NA  
 Mean edge weight: 159.04  
 Max. degree: 2430

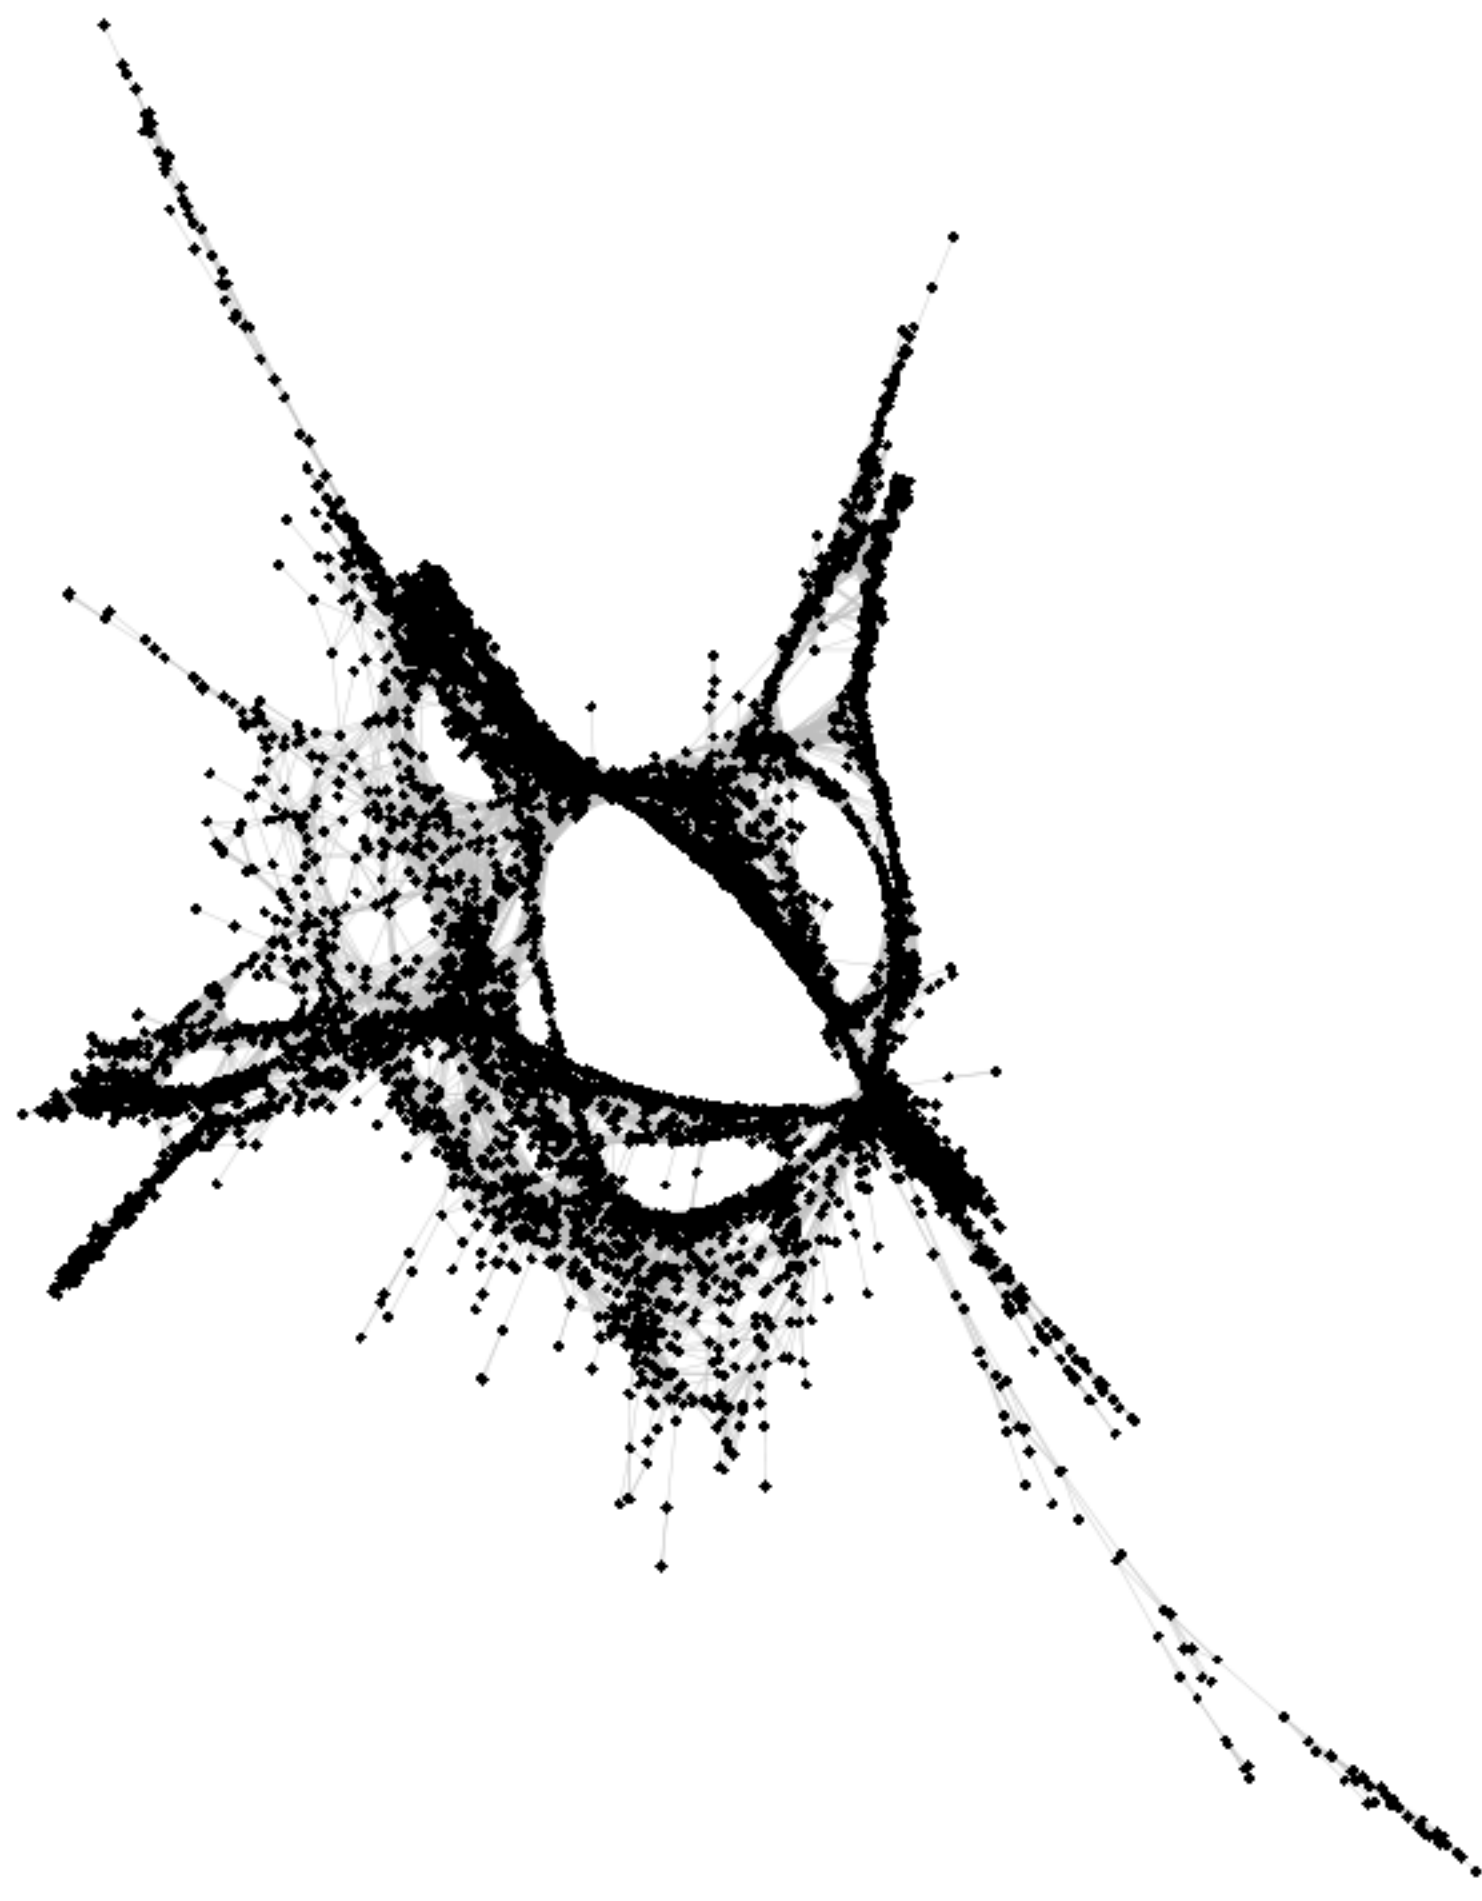

**CL26**

Number of reads: 11414  
 Number of pairs: 762795  
 Density: 0.01171  
 Diameter: NA  
 Mean edge weight: 158.78  
 Max. degree: 638

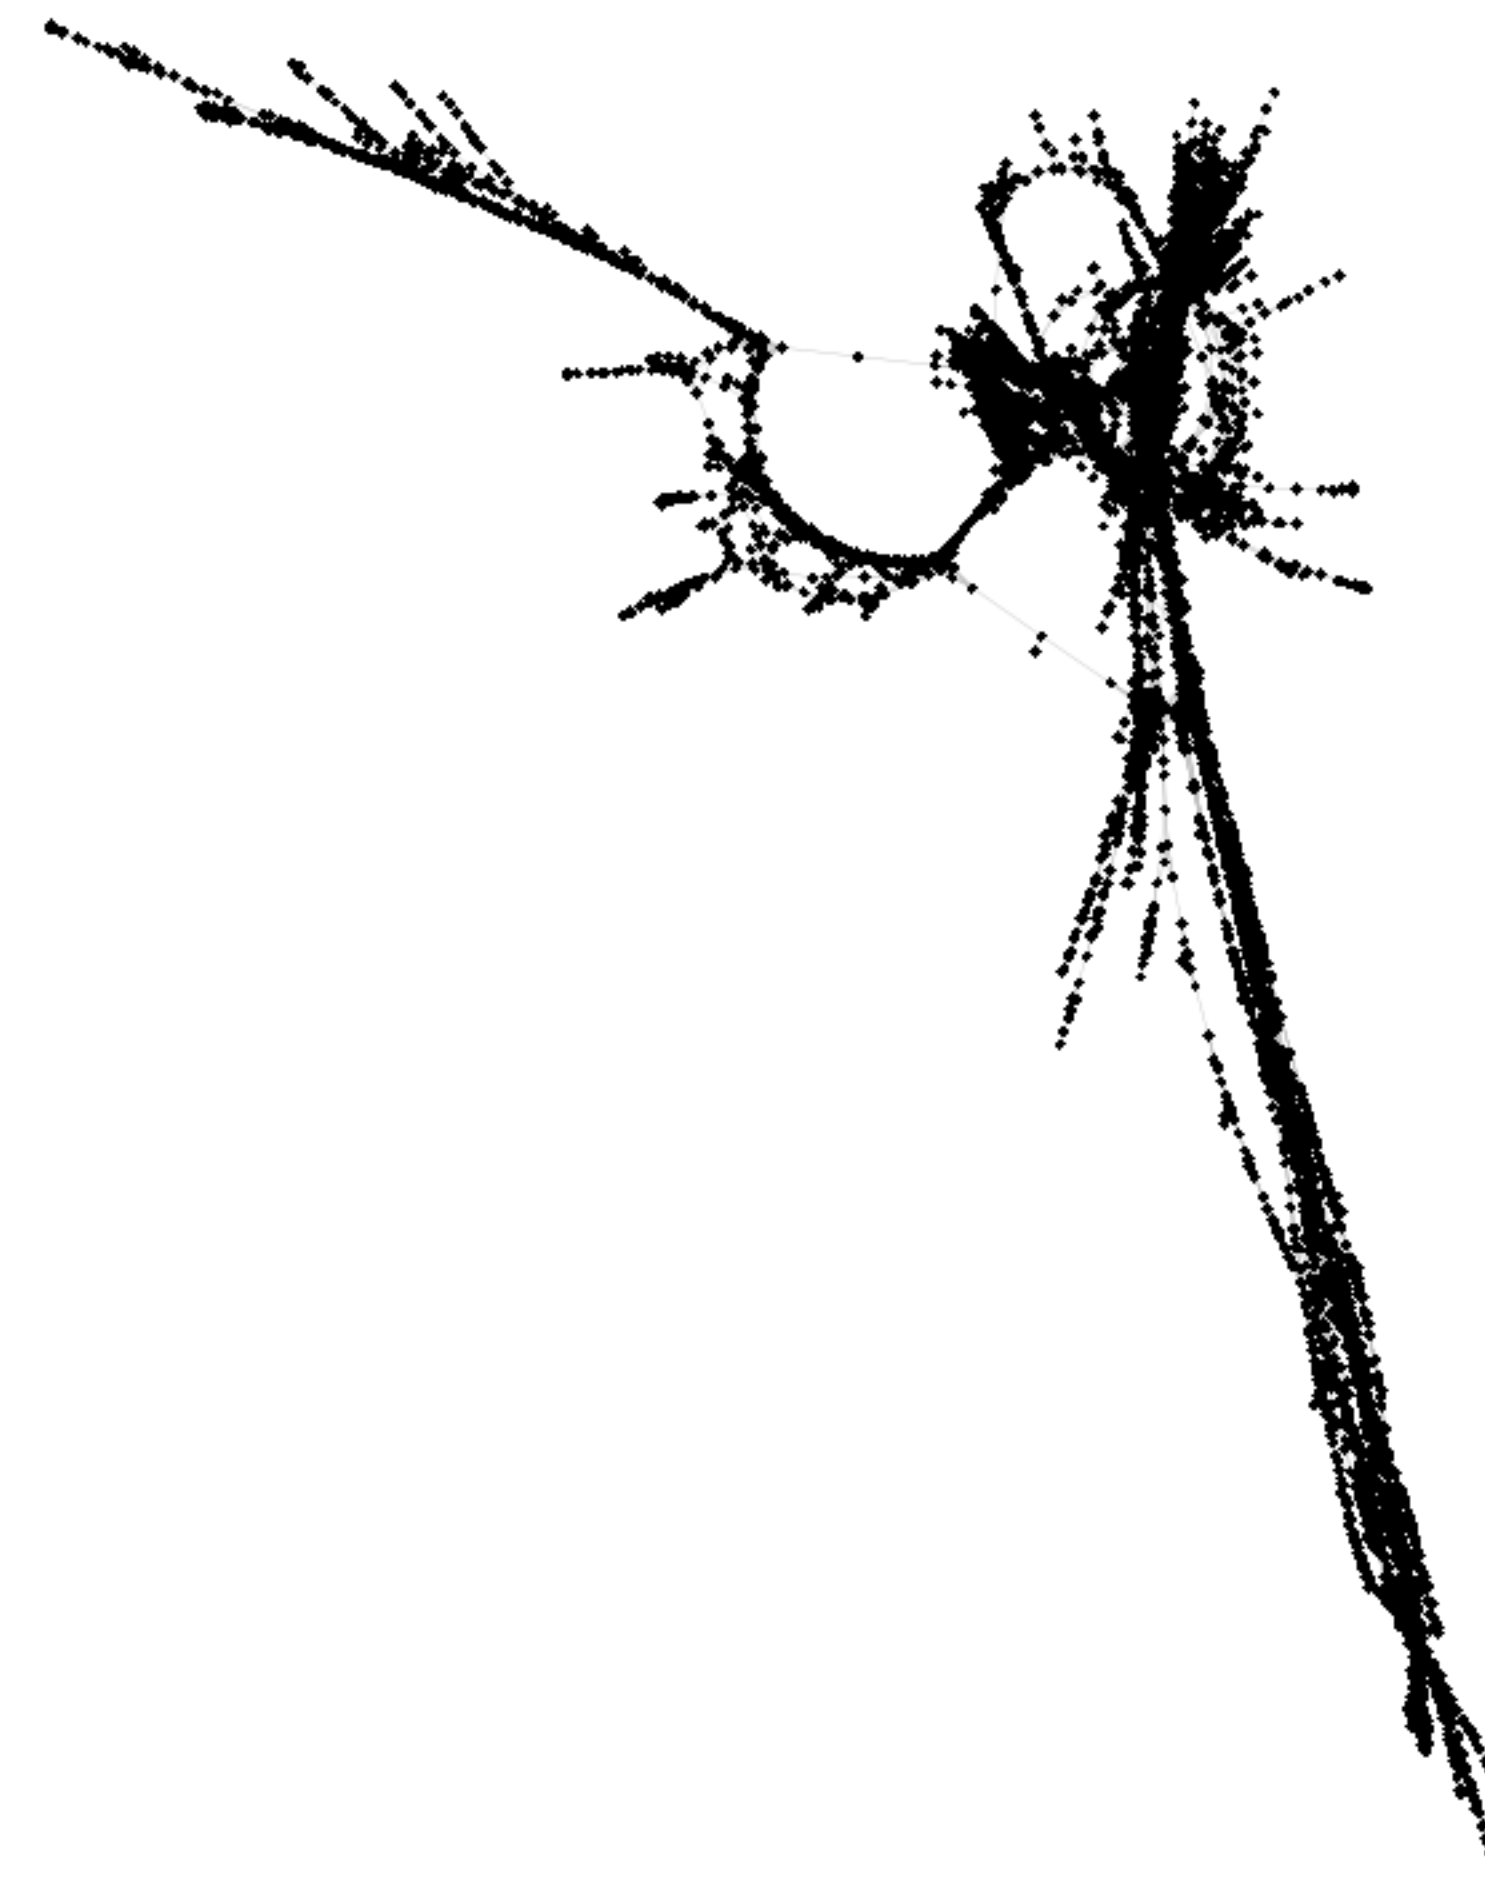

**CL27**

Number of reads: 11400  
 Number of pairs: 251020  
 Density: 0.003863  
 Diameter: NA  
 Mean edge weight: 153.65  
 Max. degree: 403

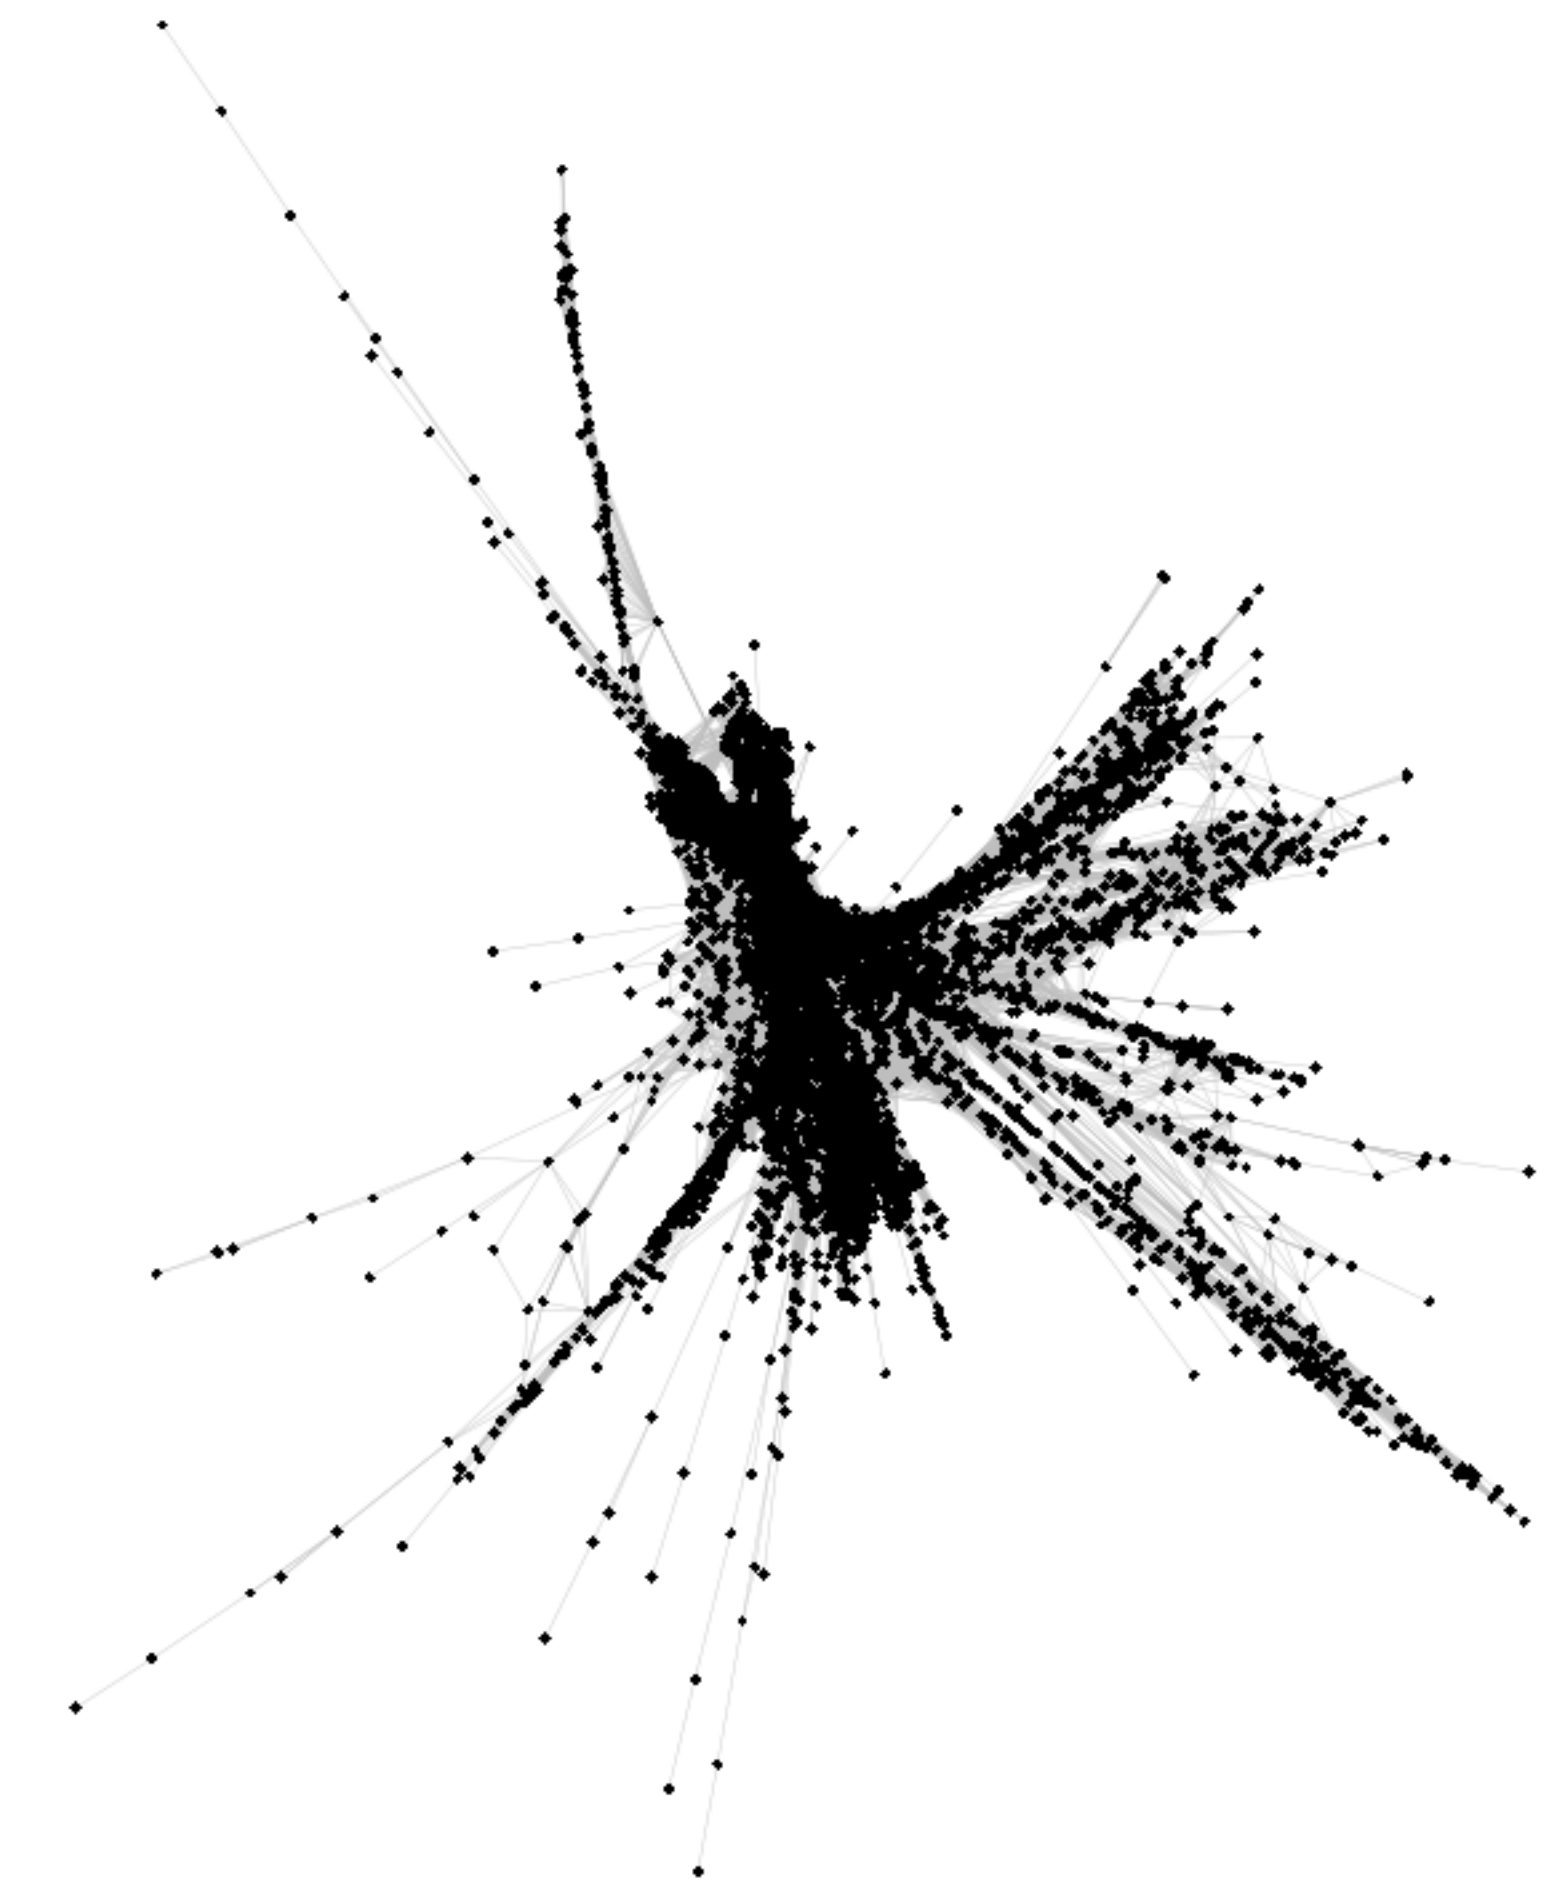

**CL28**

Number of reads: 11273  
 Number of pairs: 2572037  
 Density: 0.04048  
 Diameter: NA  
 Mean edge weight: 153.48  
 Max. degree: 1575

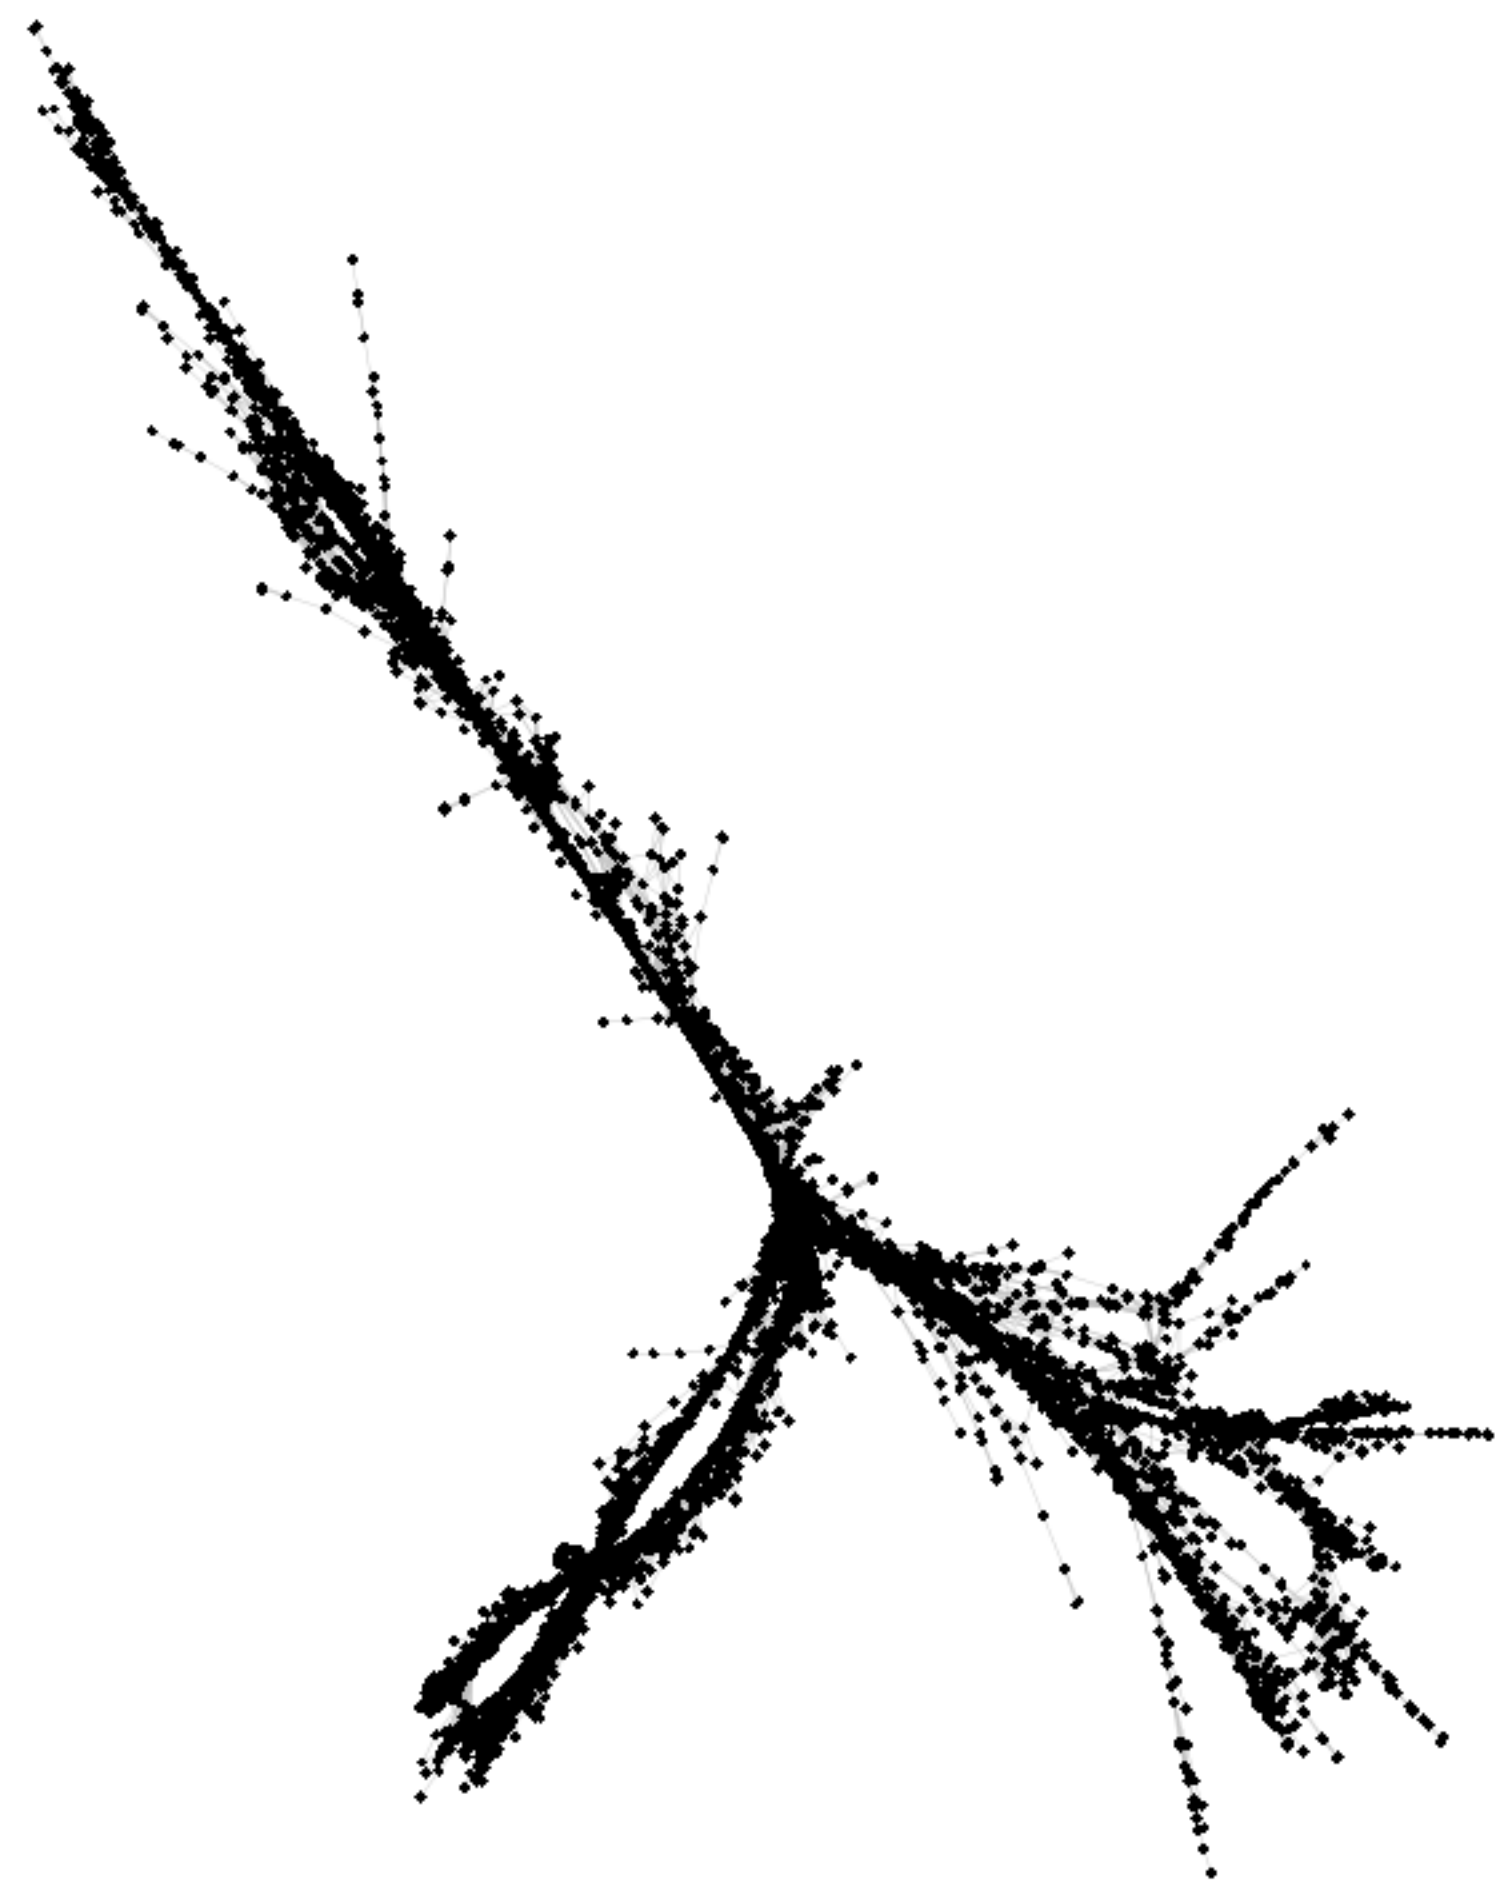

**CL29**

Number of reads: 11144  
 Number of pairs: 724522  
 Density: 0.01167  
 Diameter: NA  
 Mean edge weight: 165.76  
 Max. degree: 483

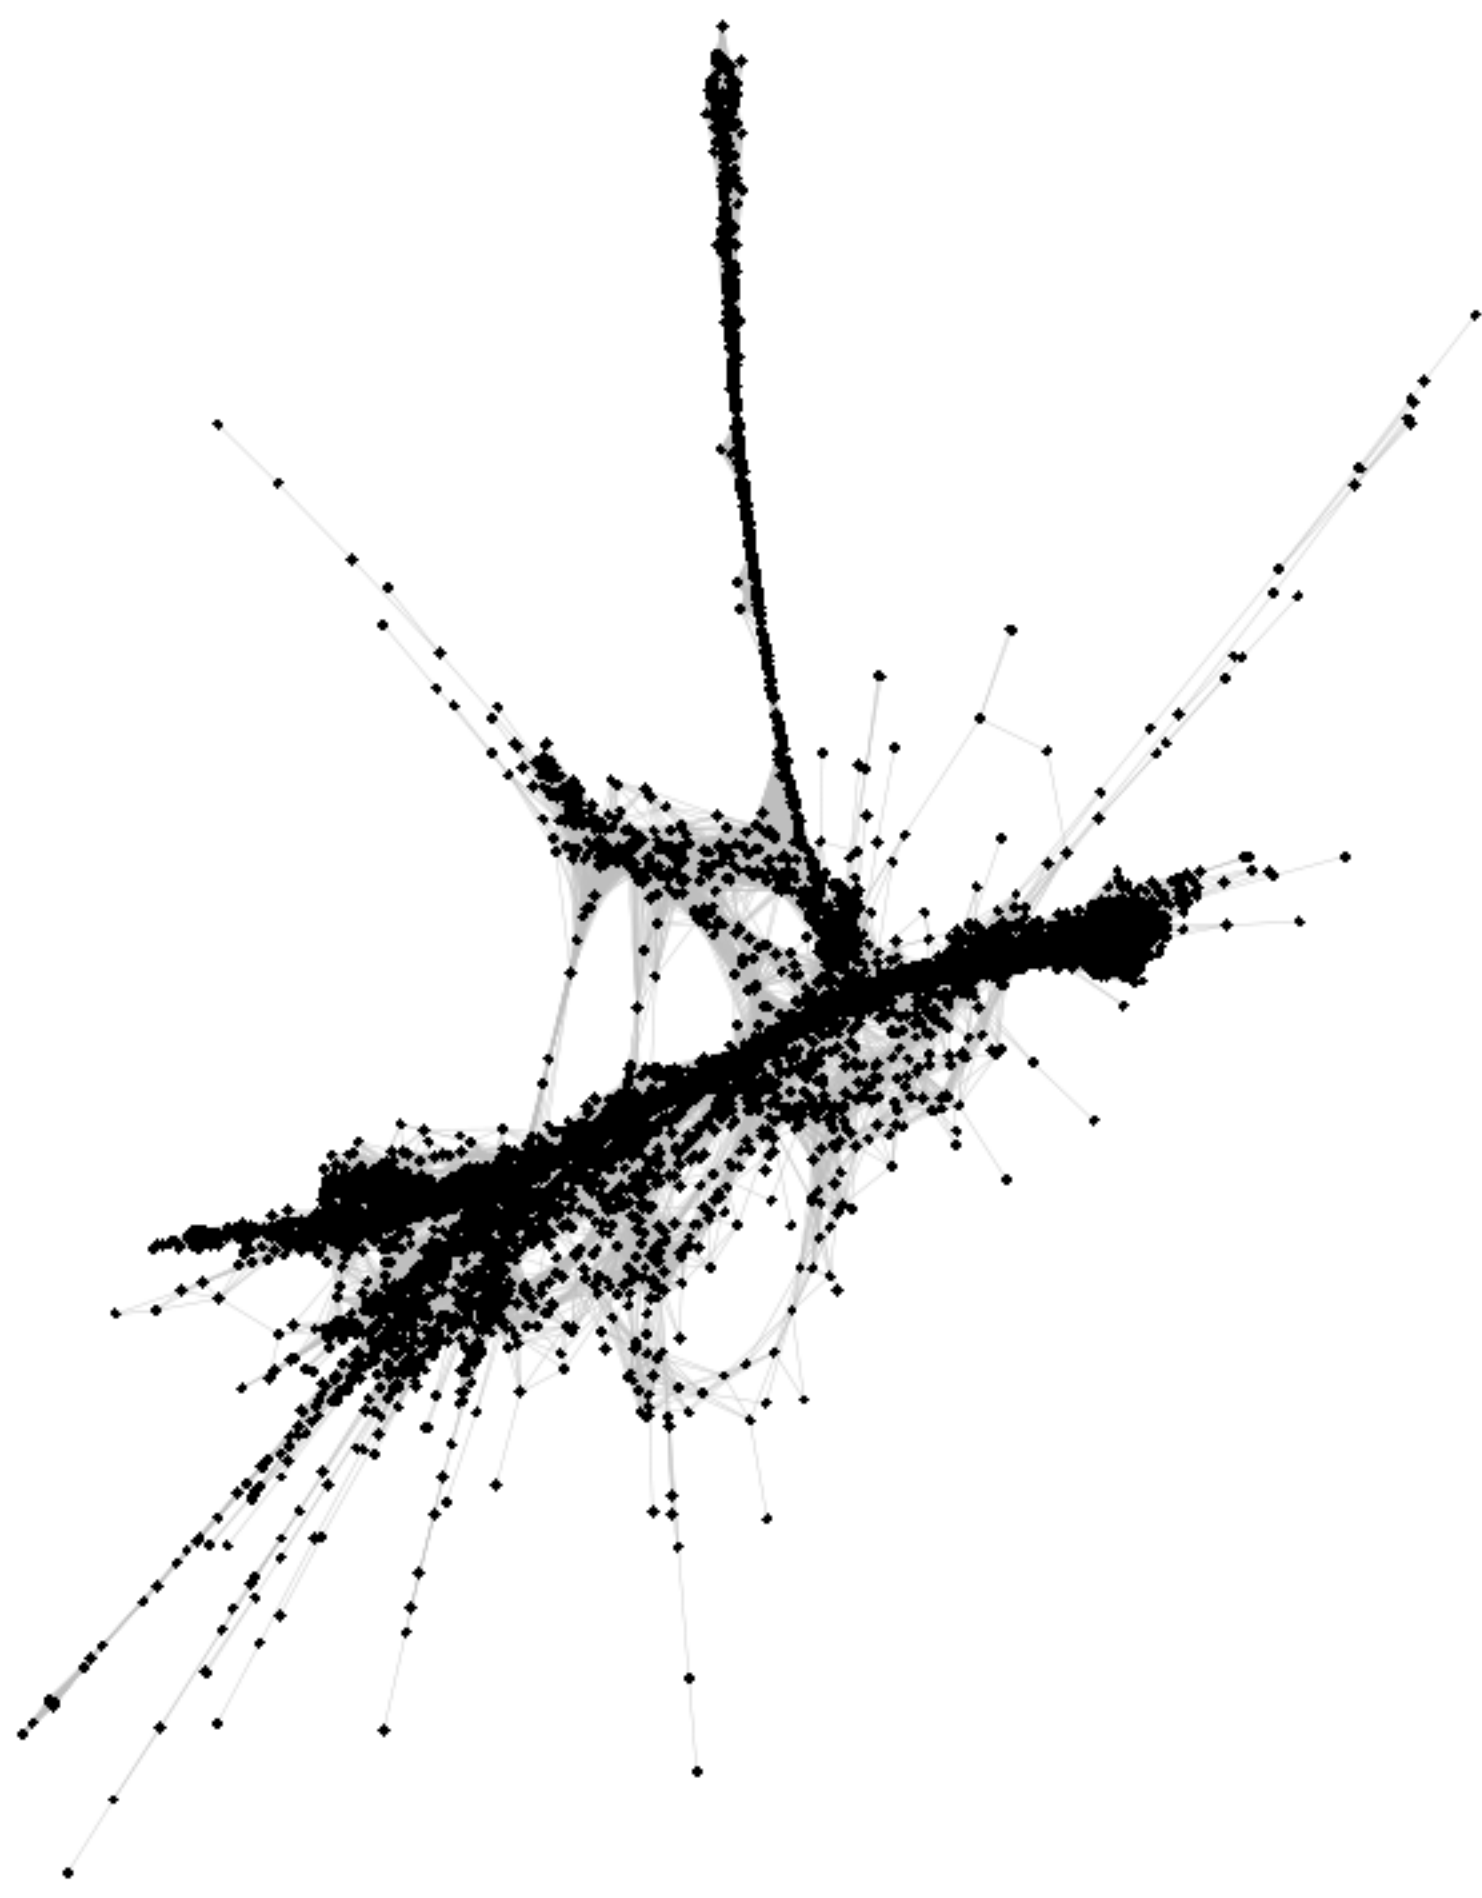

**CL30**

Number of reads: 11116  
 Number of pairs: 1991594  
 Density: 0.03224  
 Diameter: NA  
 Mean edge weight: 158.54  
 Max. degree: 1013

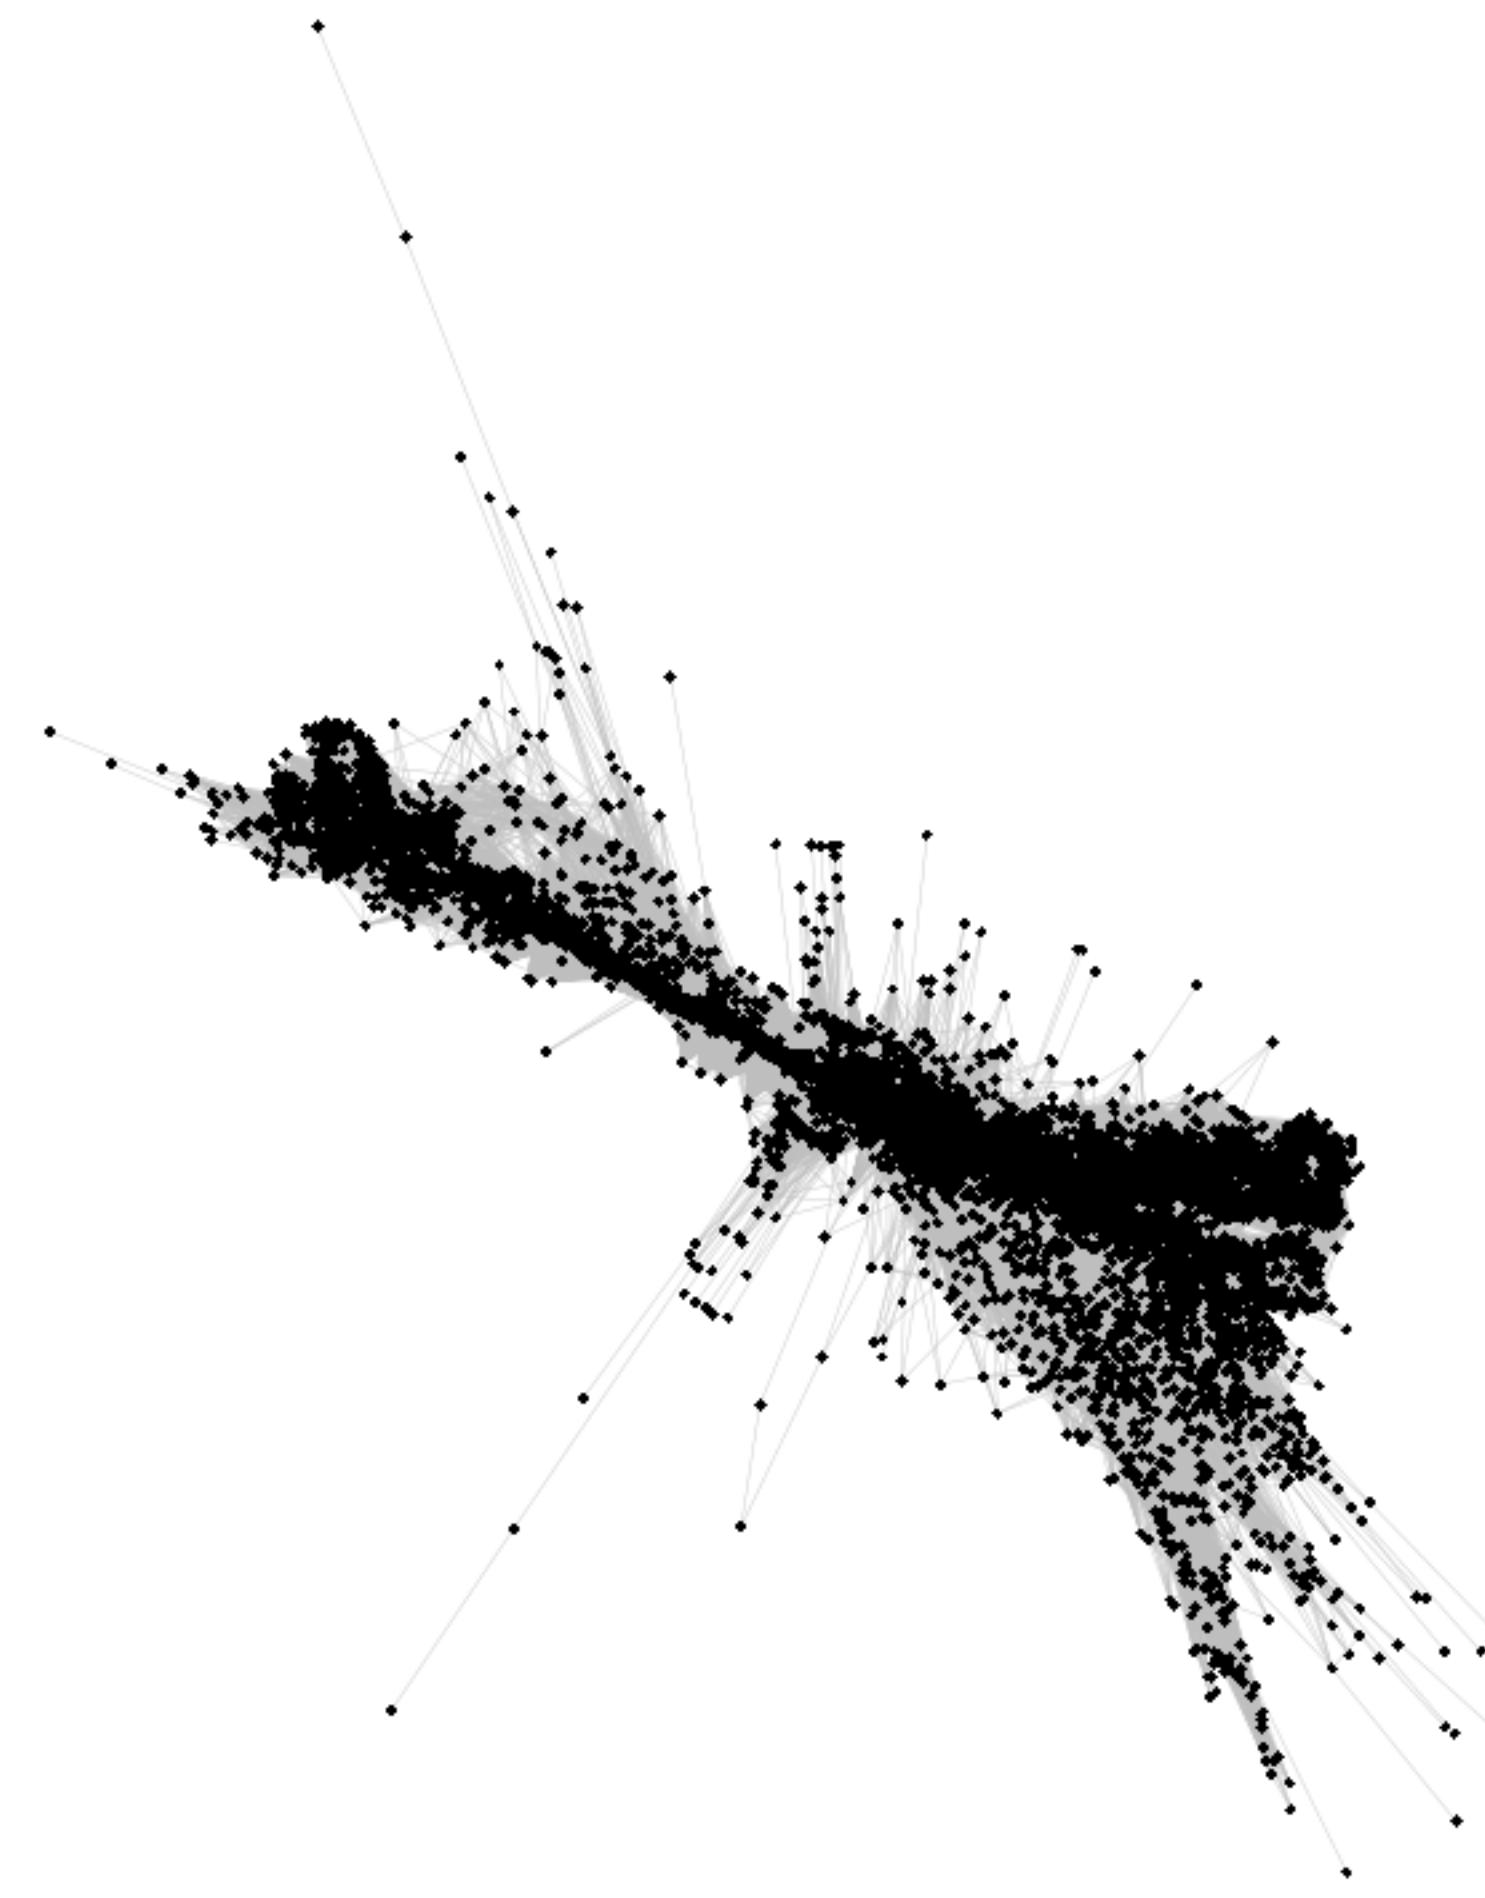

**CL31**

Number of reads: 10833  
 Number of pairs: 4071709  
 Density: 0.0694  
 Diameter: NA  
 Mean edge weight: 159.32  
 Max. degree: 2015

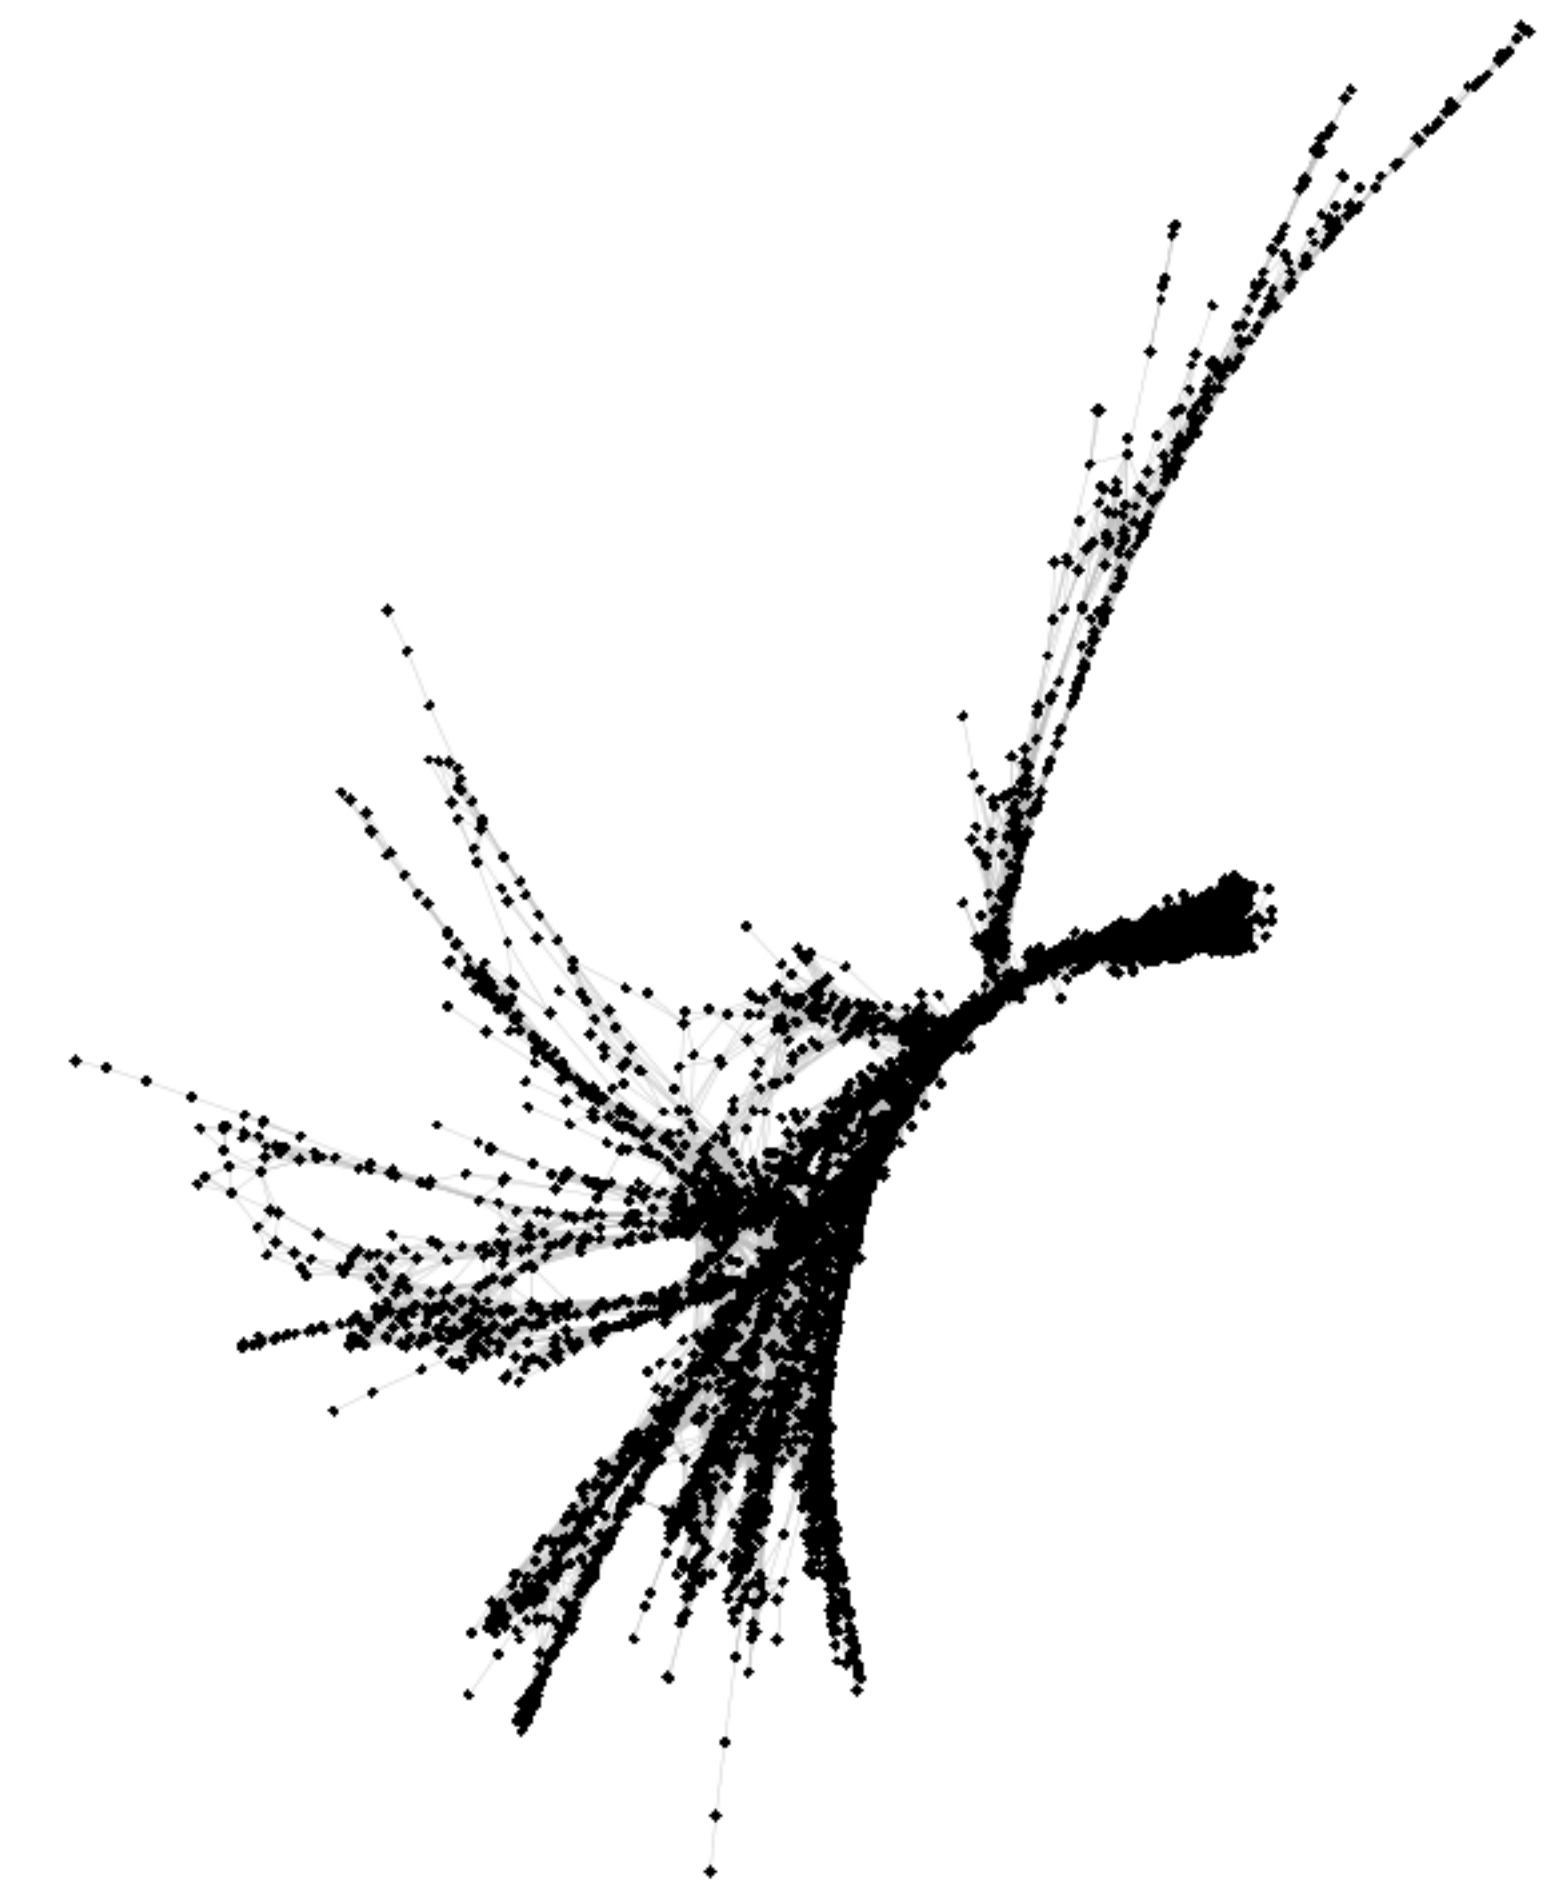

**CL32**

Number of reads: 10774  
 Number of pairs: 1739416  
 Density: 0.02997  
 Diameter: NA  
 Mean edge weight: 166.14  
 Max. degree: 908

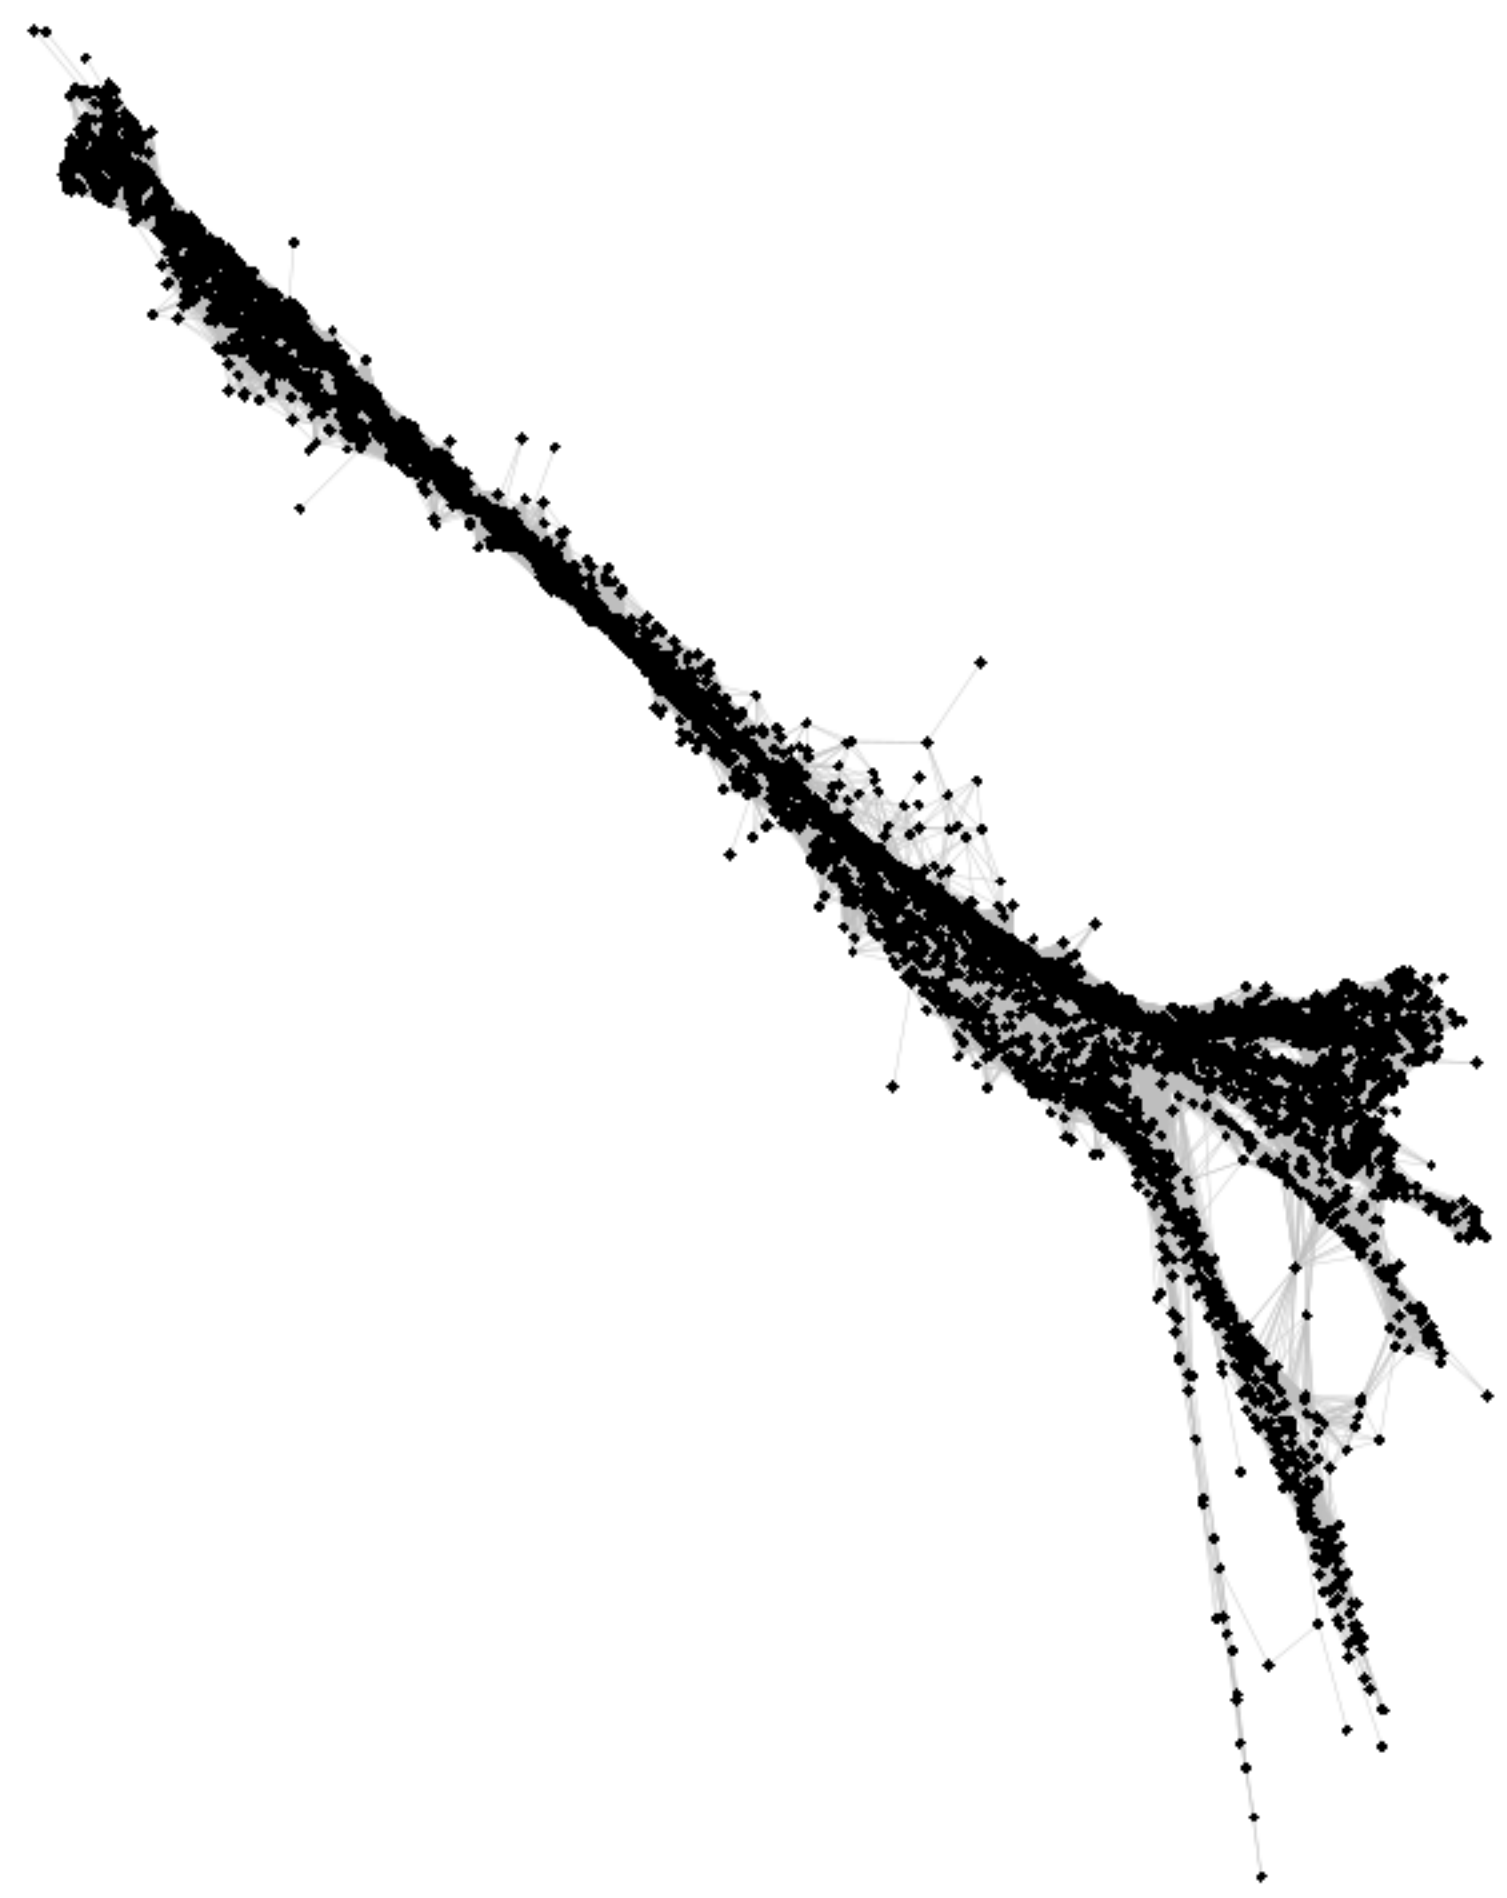

**CL33**

Number of reads: 10676  
 Number of pairs: 1934314  
 Density: 0.03395  
 Diameter: NA  
 Mean edge weight: 168.1  
 Max. degree: 772

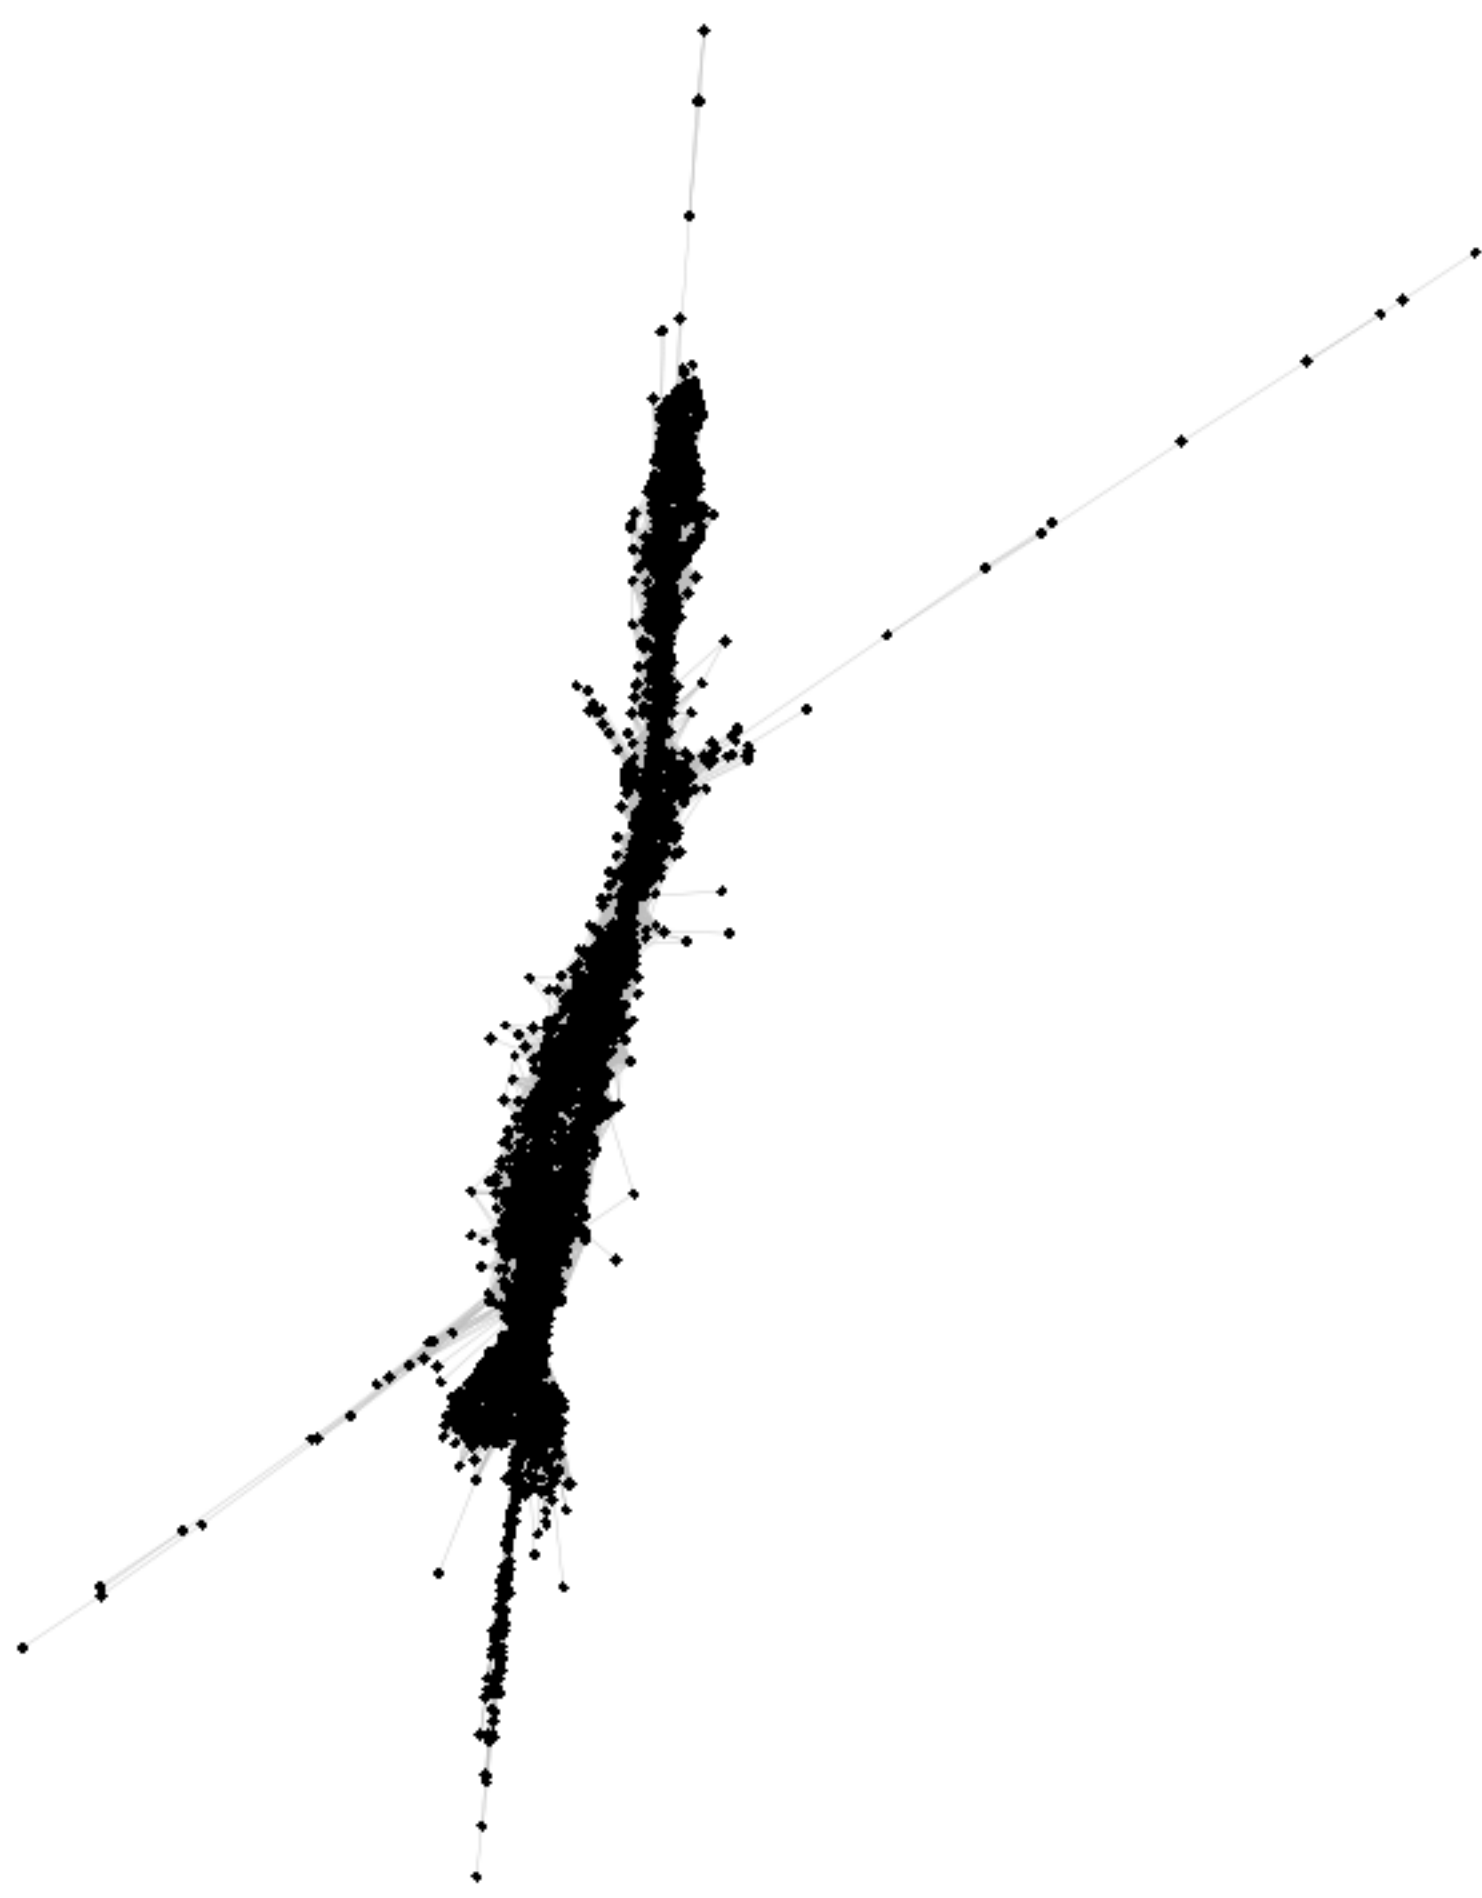

**CL34**

Number of reads: 10655  
 Number of pairs: 2646736  
 Density: 0.04663  
 Diameter: NA  
 Mean edge weight: 157.36  
 Max. degree: 1414

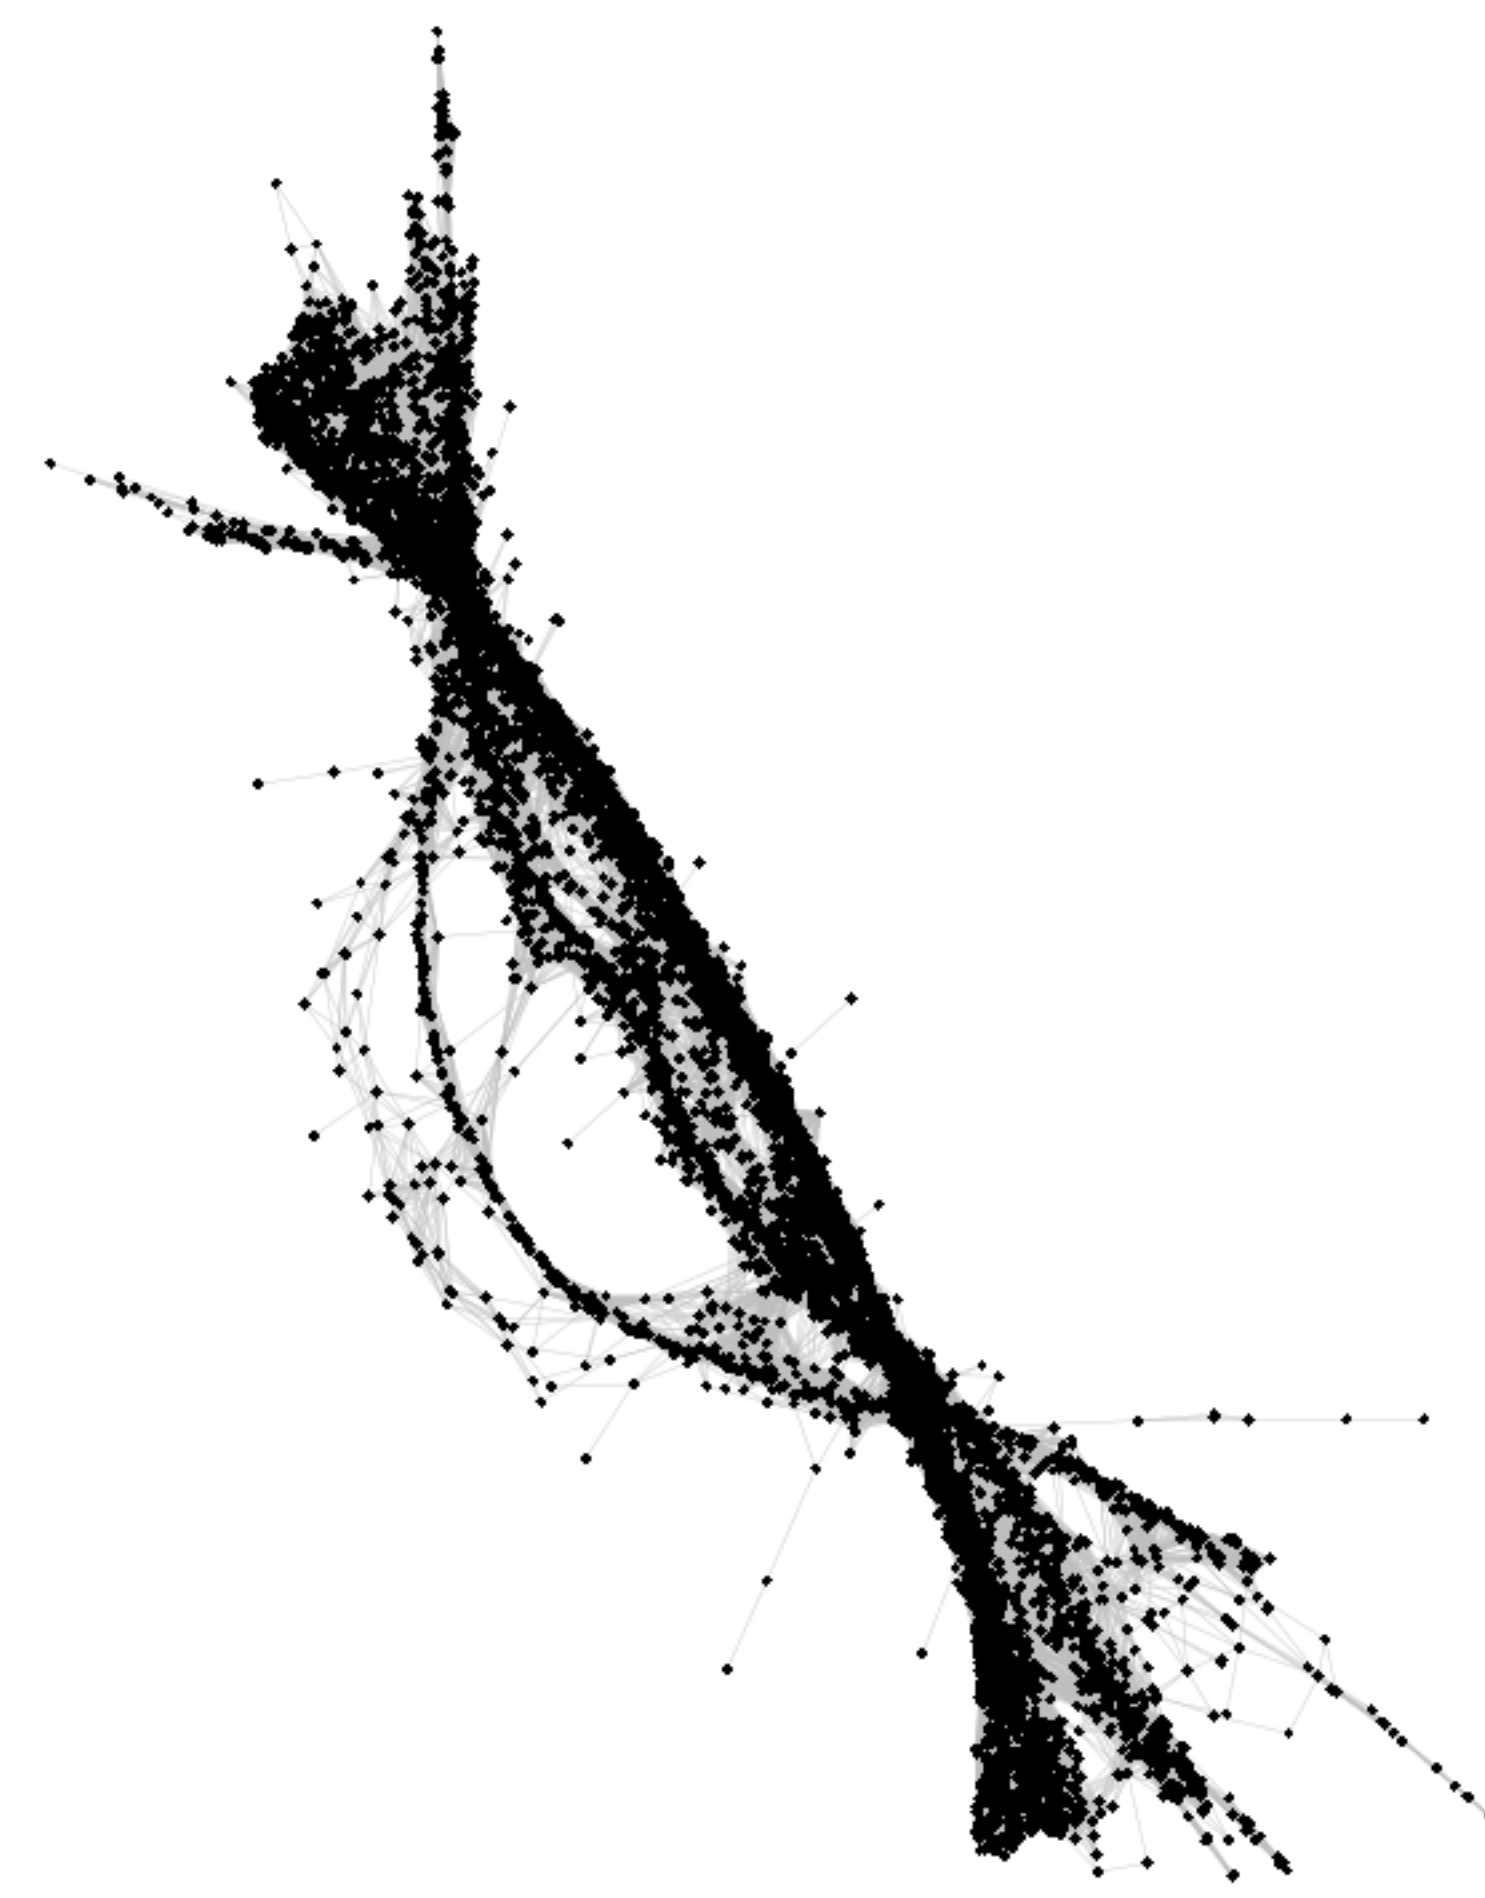

**CL35**

Number of reads: 10553  
 Number of pairs: 948746  
 Density: 0.01704  
 Diameter: NA  
 Mean edge weight: 157.42  
 Max. degree: 504

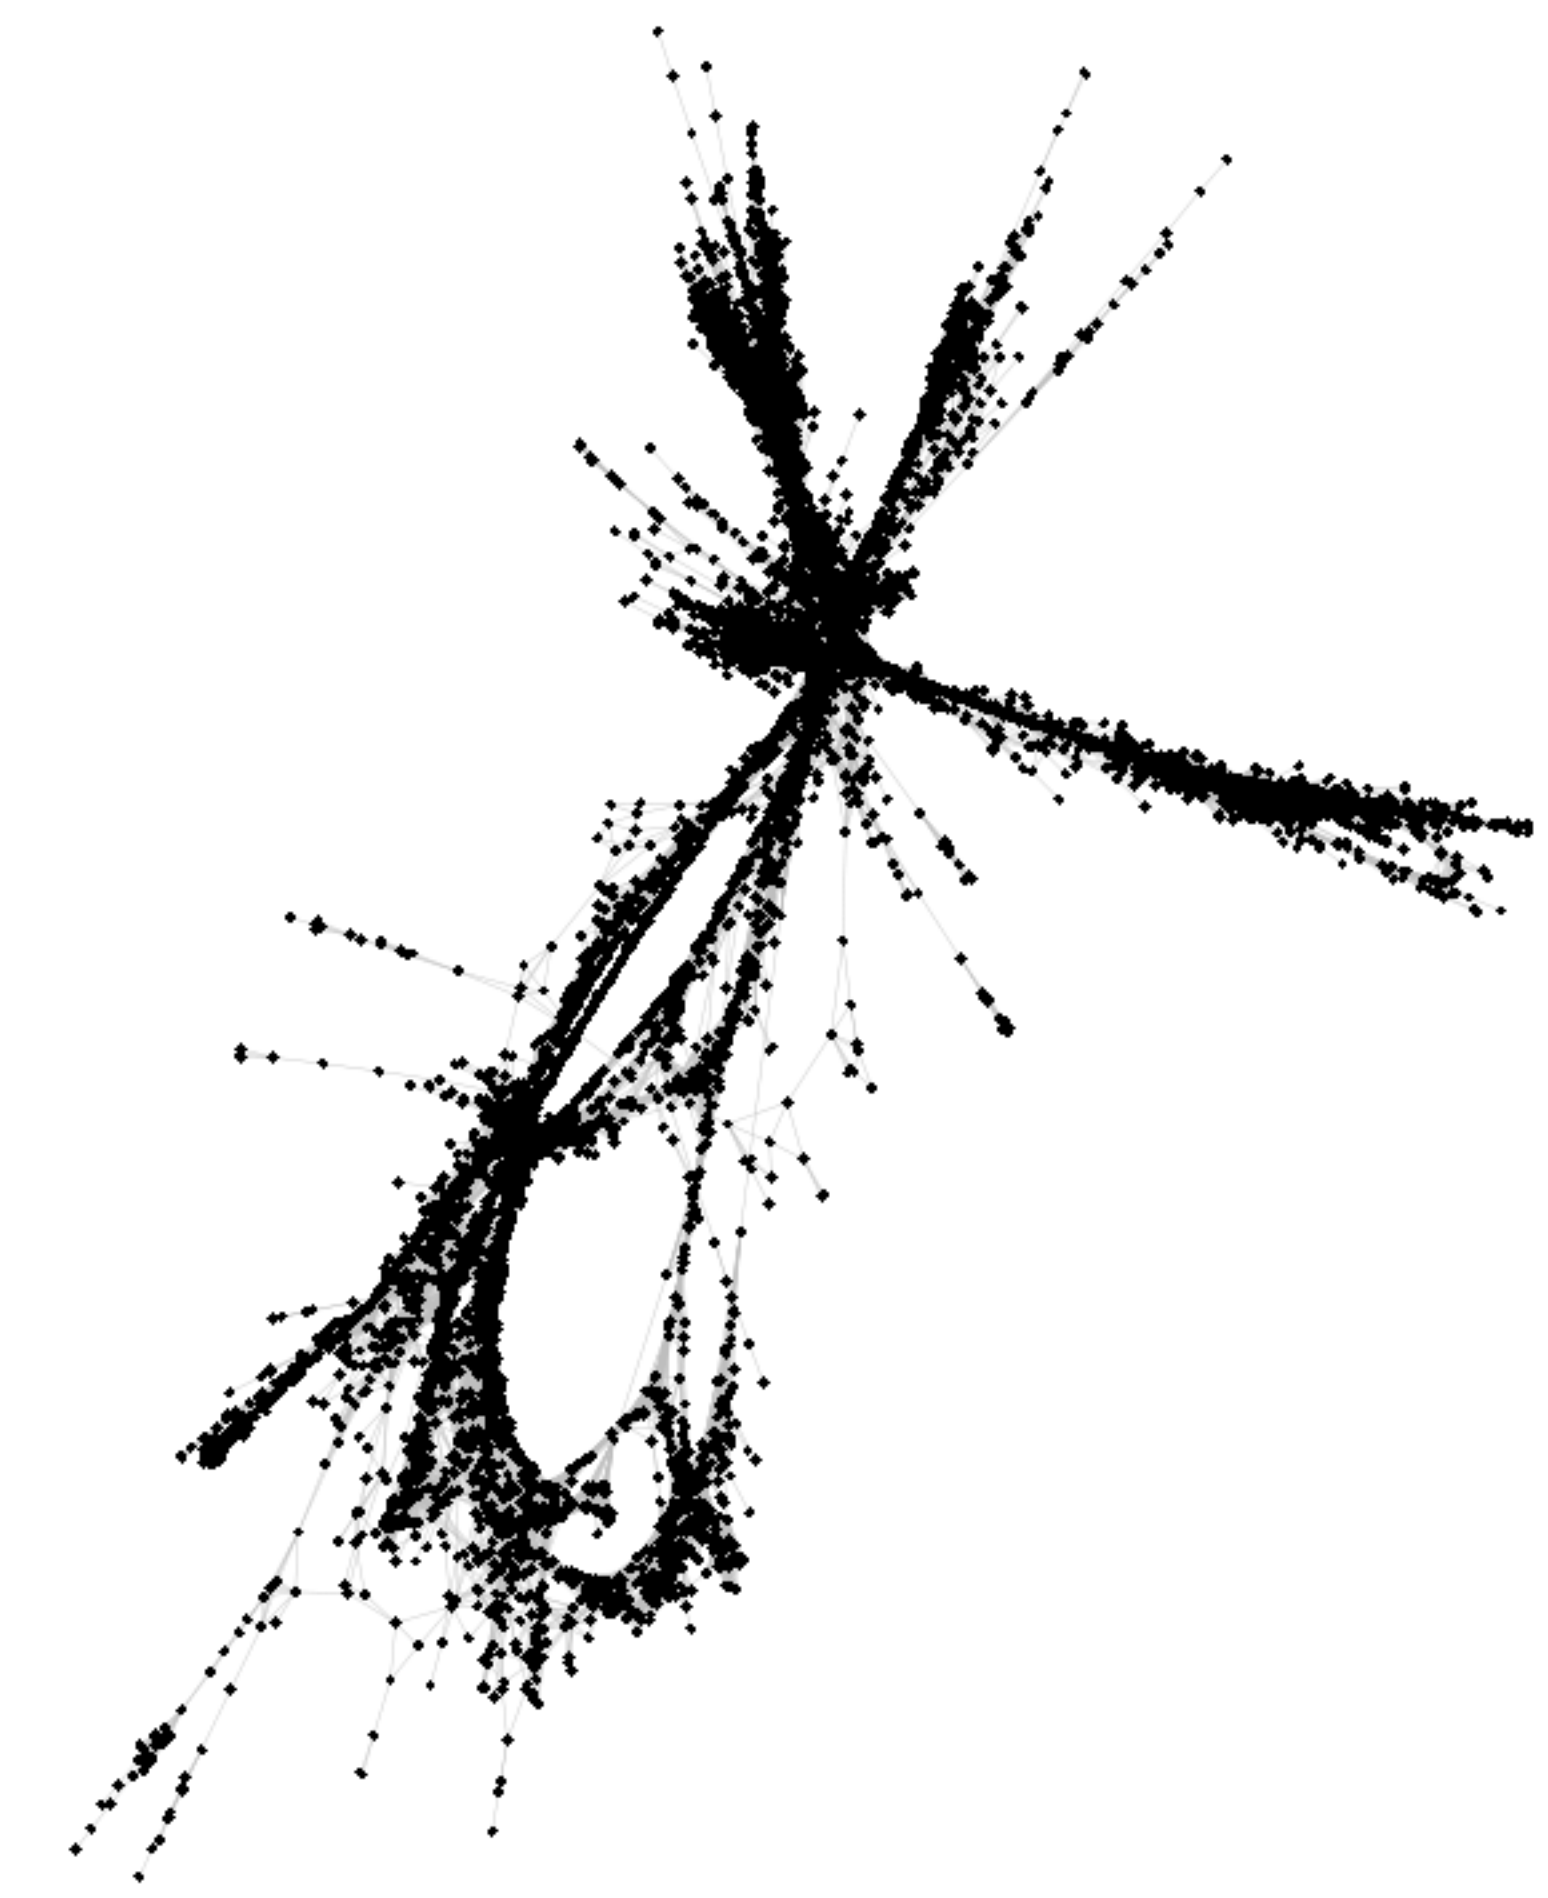

**CL36**

Number of reads: 10343  
 Number of pairs: 390573  
 Density: 0.007303  
 Diameter: NA  
 Mean edge weight: 159.63  
 Max. degree: 391

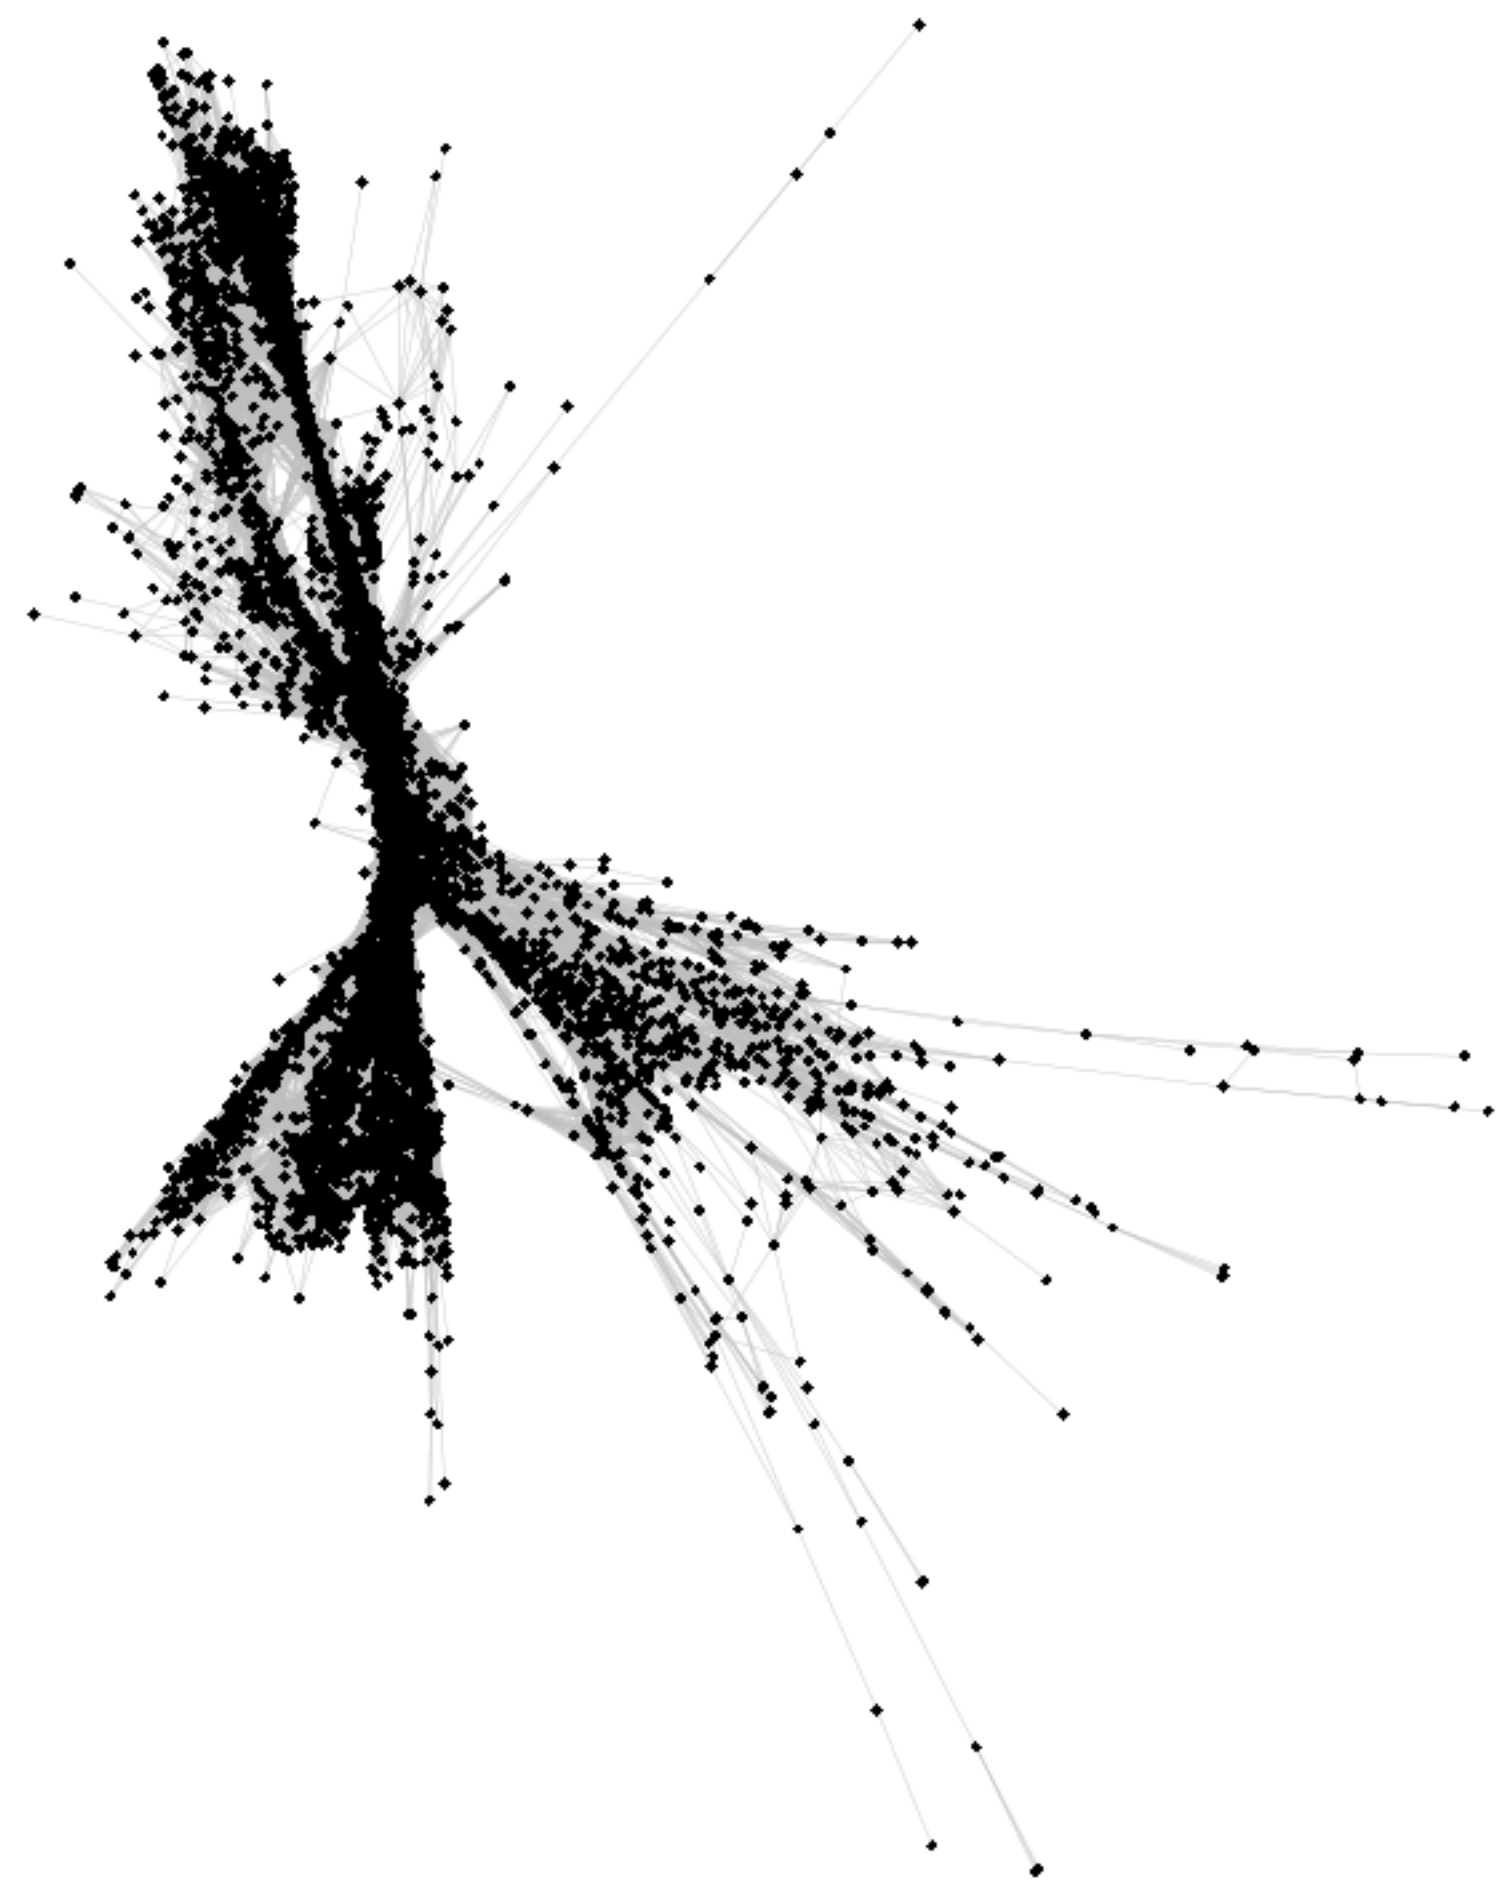

**CL37**

Number of reads: 10178  
Number of pairs: 2998725  
Density: 0.0579  
Diameter: NA  
Mean edge weigth: 165.98  
Max. degree: 1805

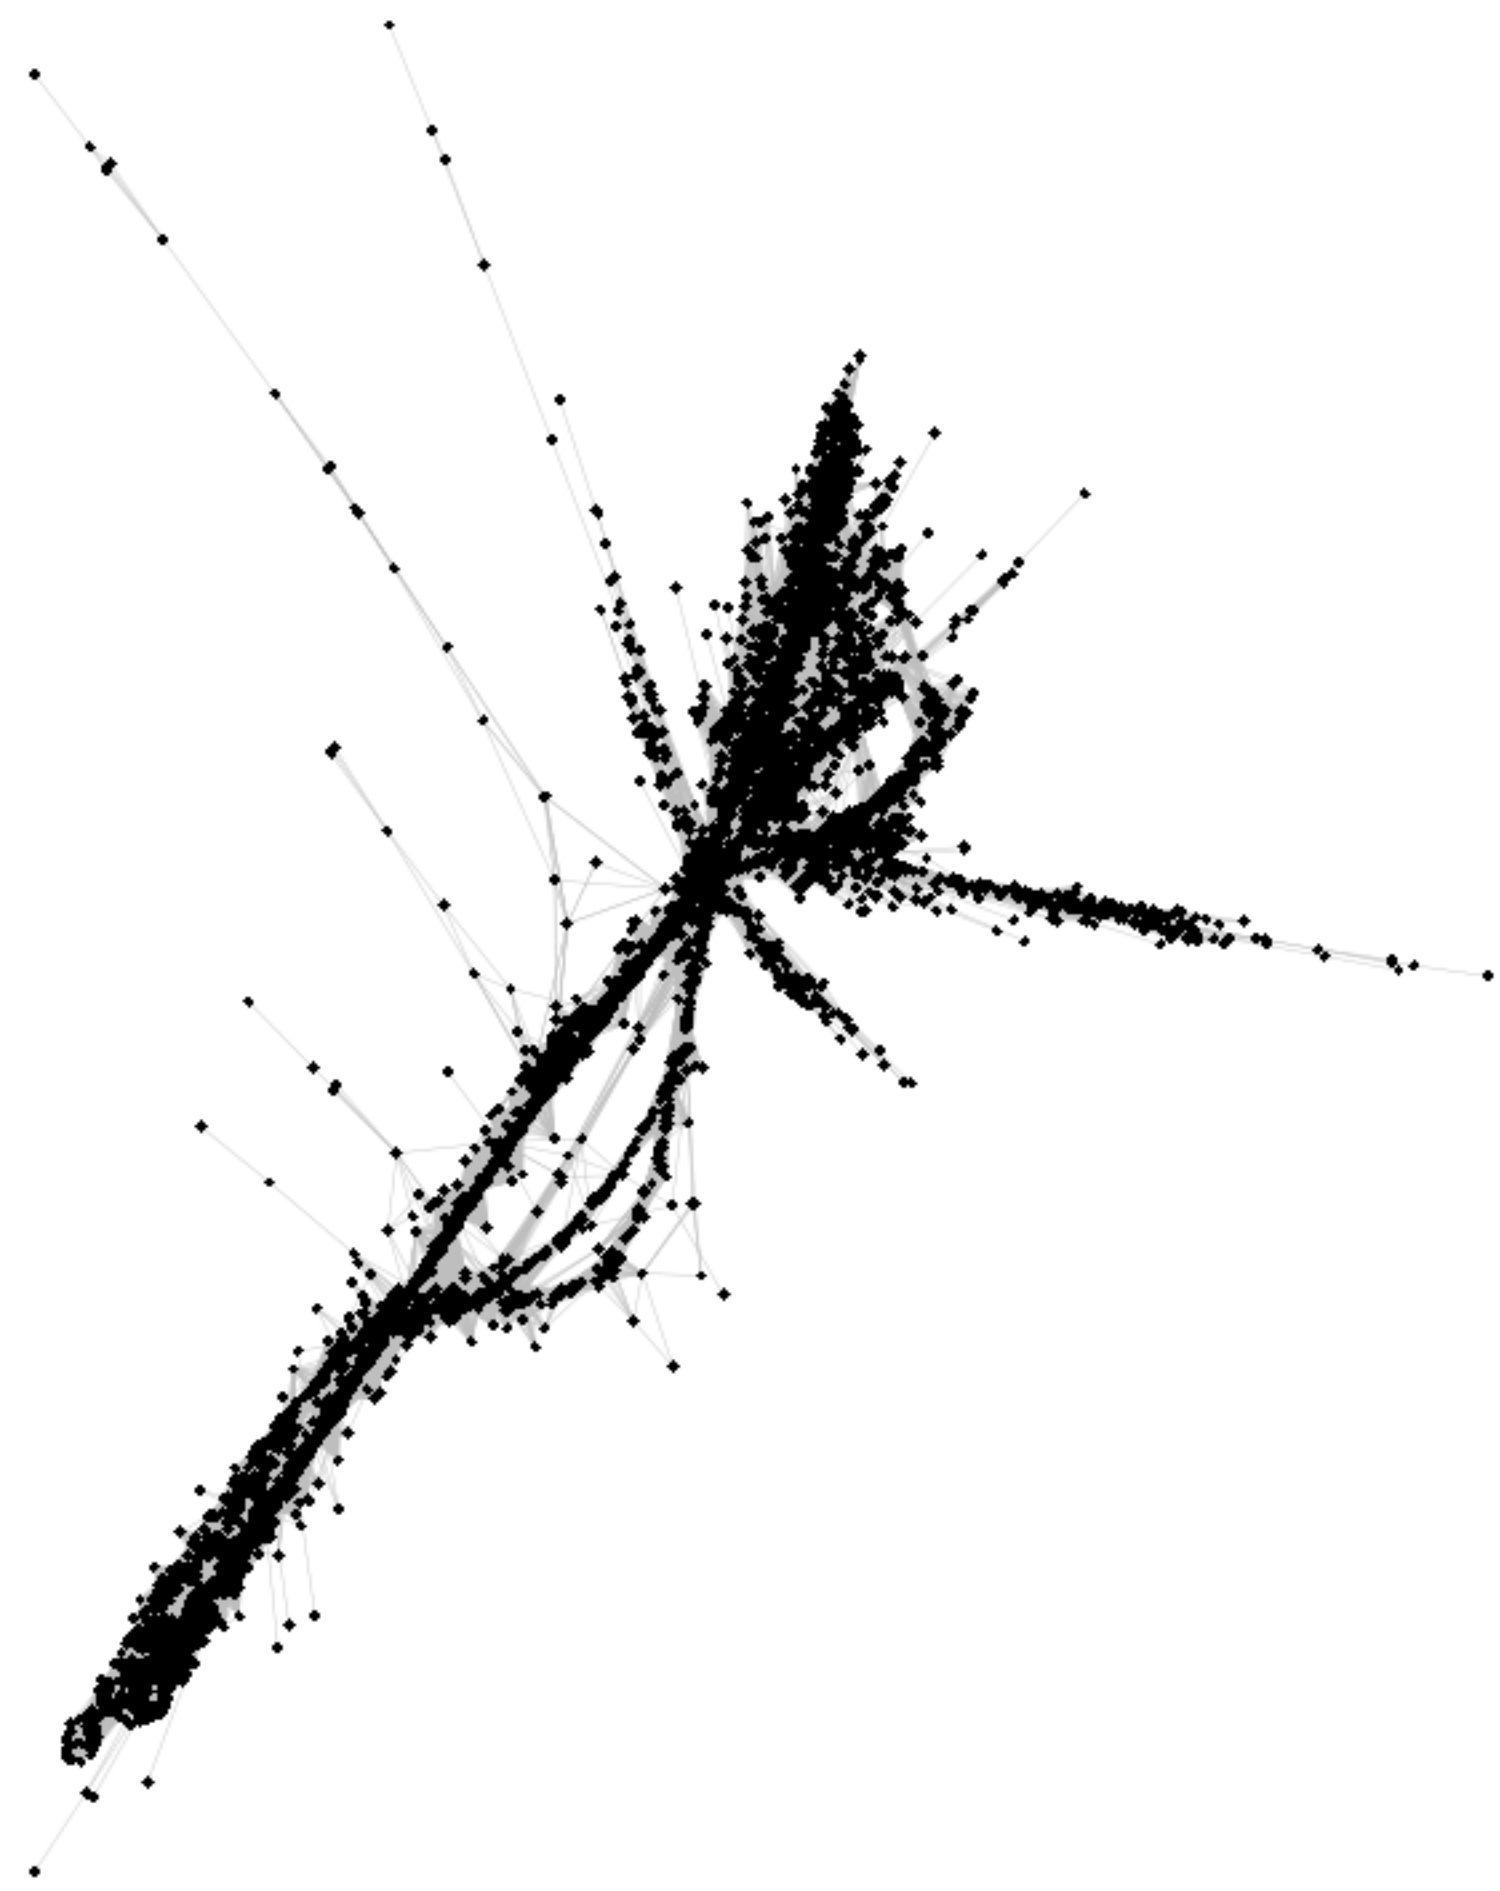

**CL38**

Number of reads: 10096  
Number of pairs: 1843501  
Density: 0.03618  
Diameter: NA  
Mean edge weigth: 165.25  
Max. degree: 779

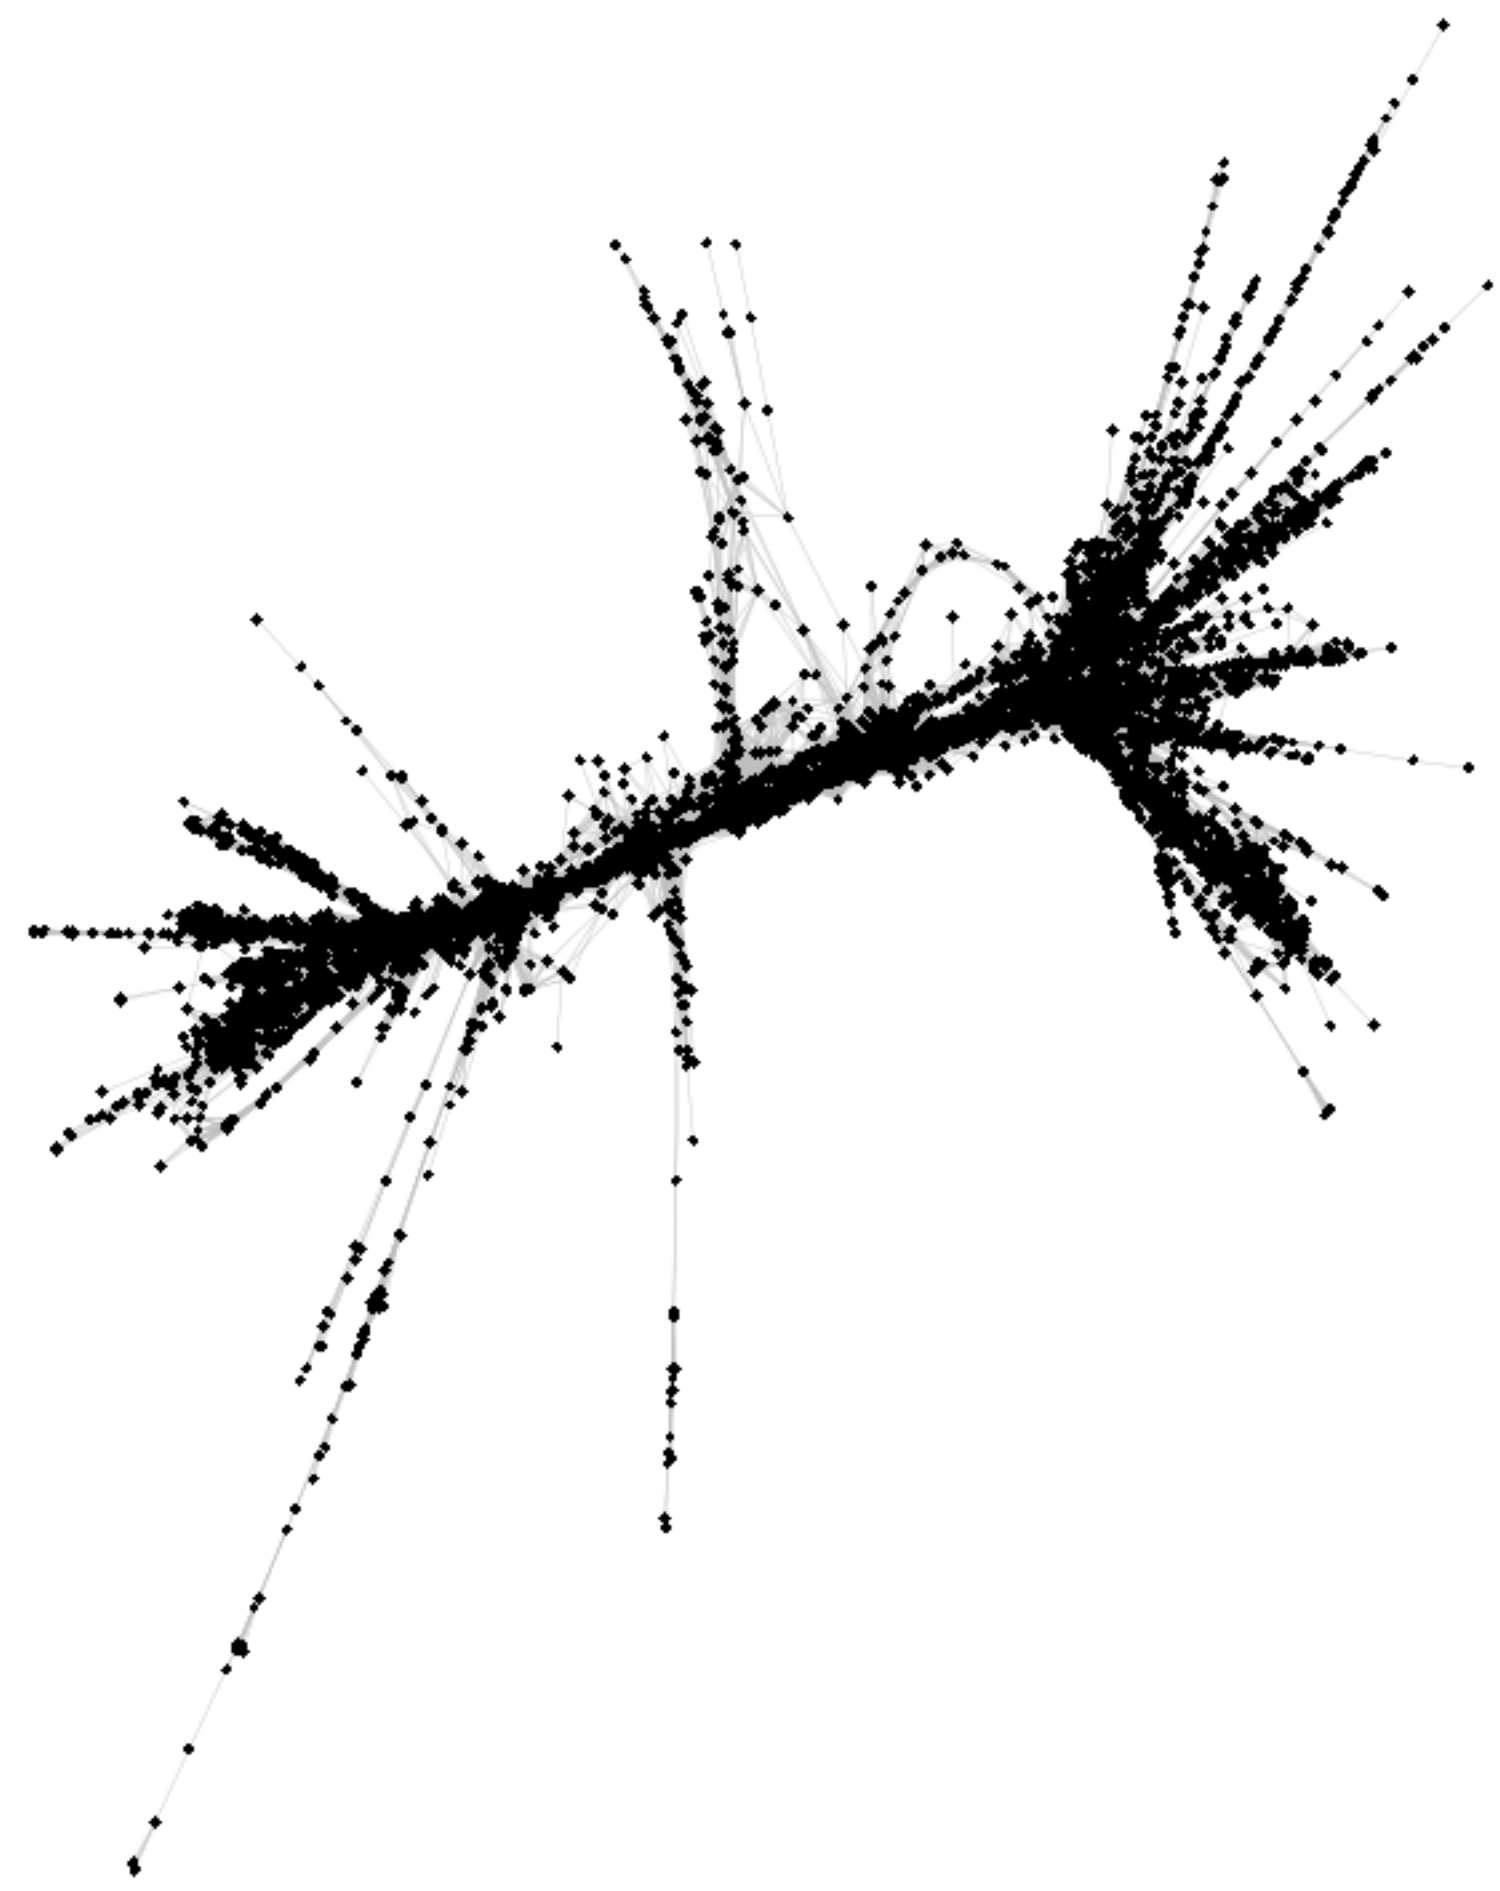

**CL39**

Number of reads: 9907  
Number of pairs: 1119156  
Density: 0.02281  
Diameter: NA  
Mean edge weigth: 156.56  
Max. degree: 789

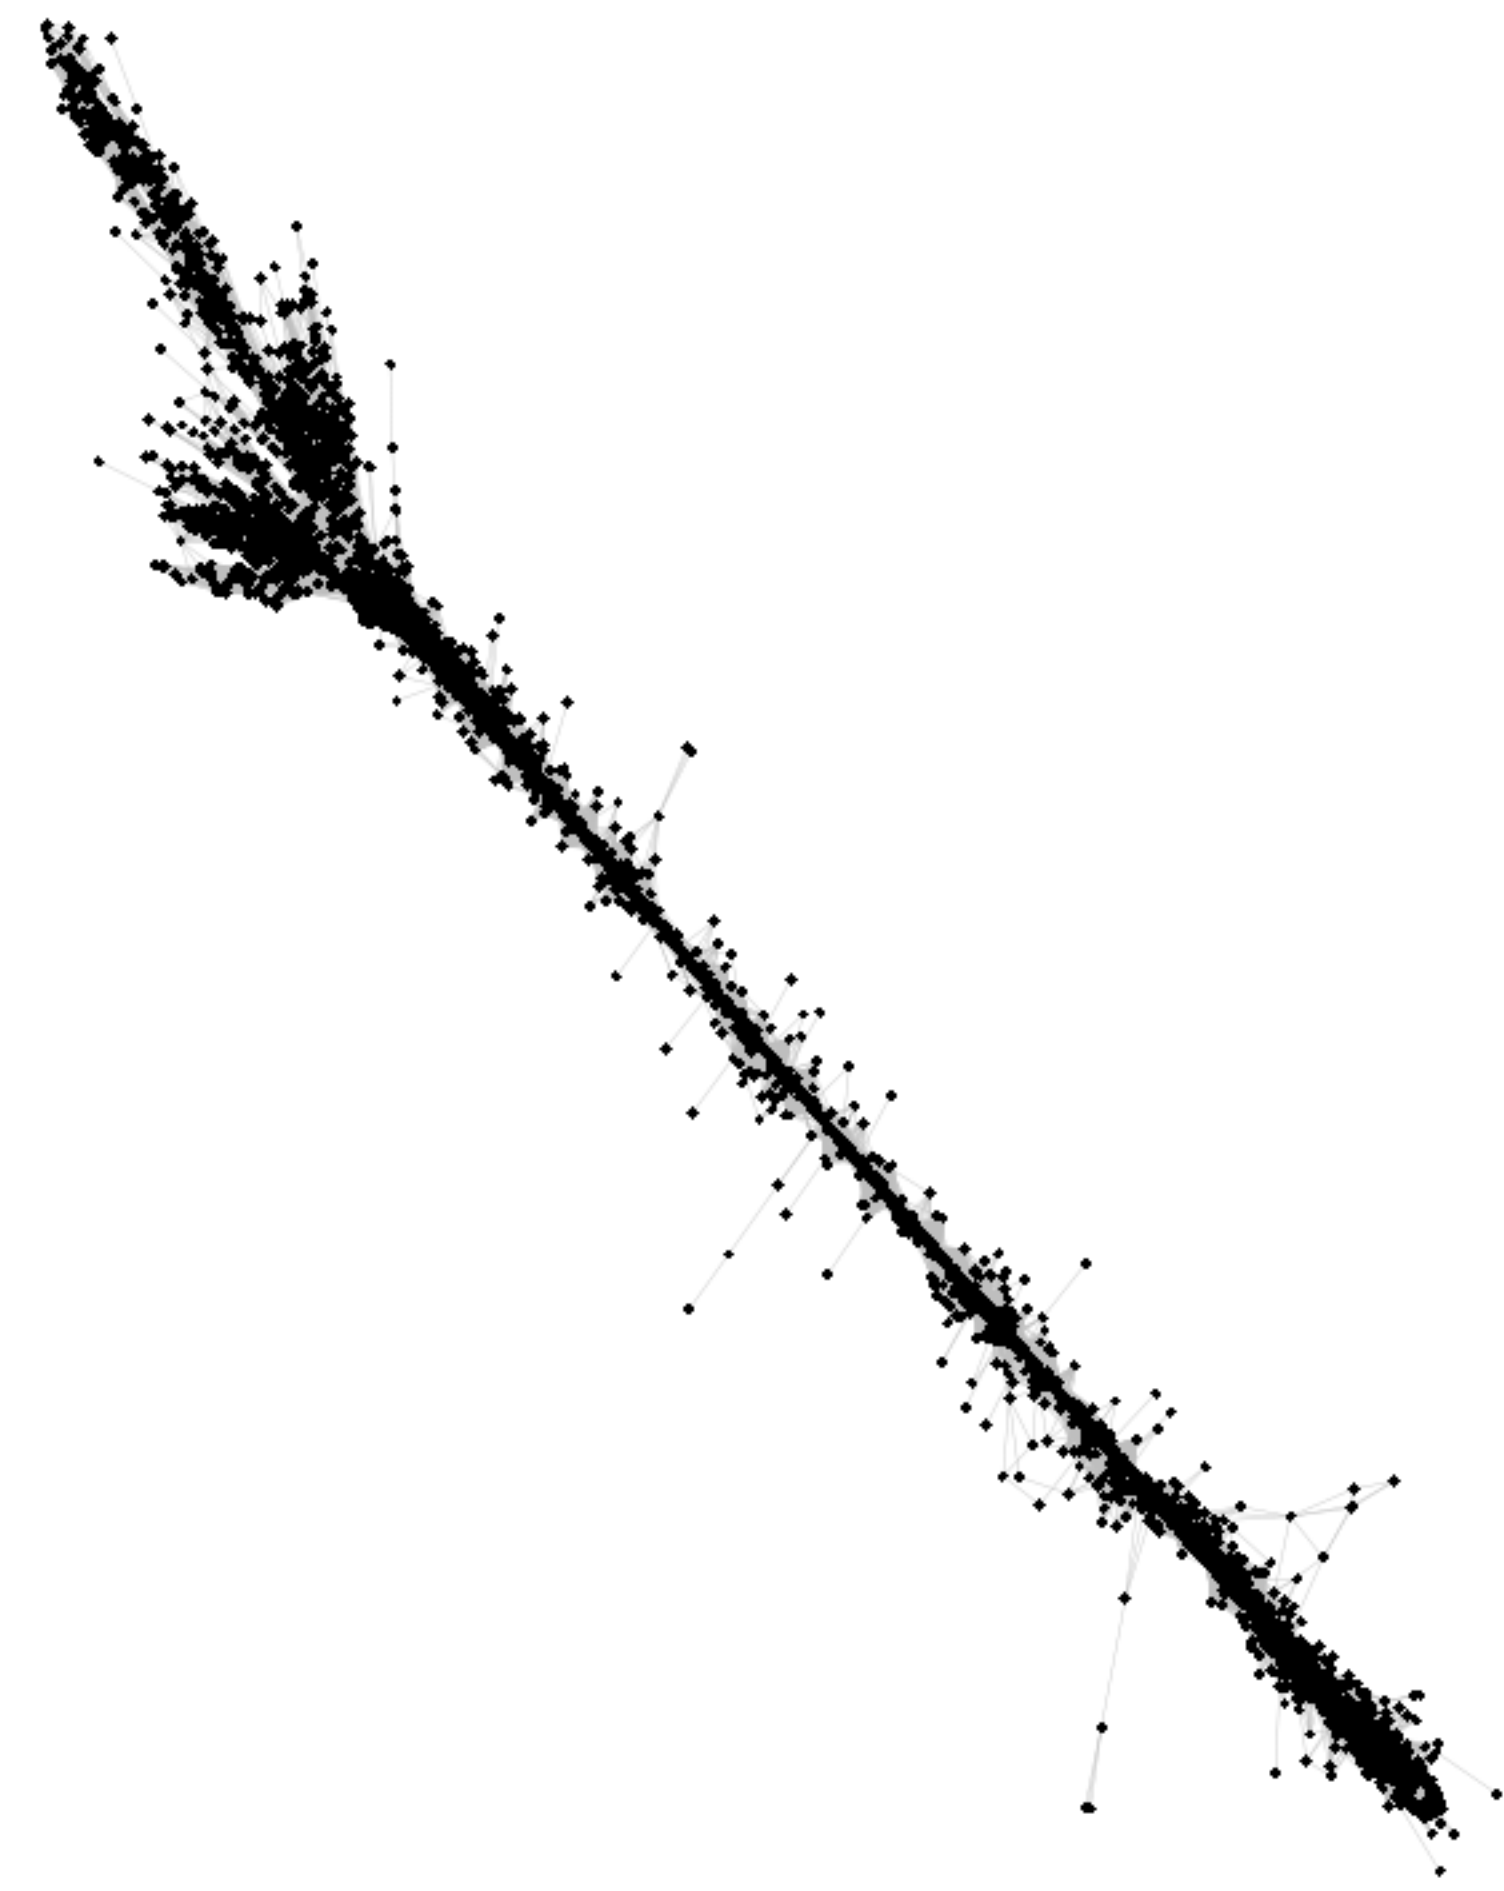

**CL40**

Number of reads: 9897  
Number of pairs: 1843570  
Density: 0.03765  
Diameter: NA  
Mean edge weigth: 167.77  
Max. degree: 630

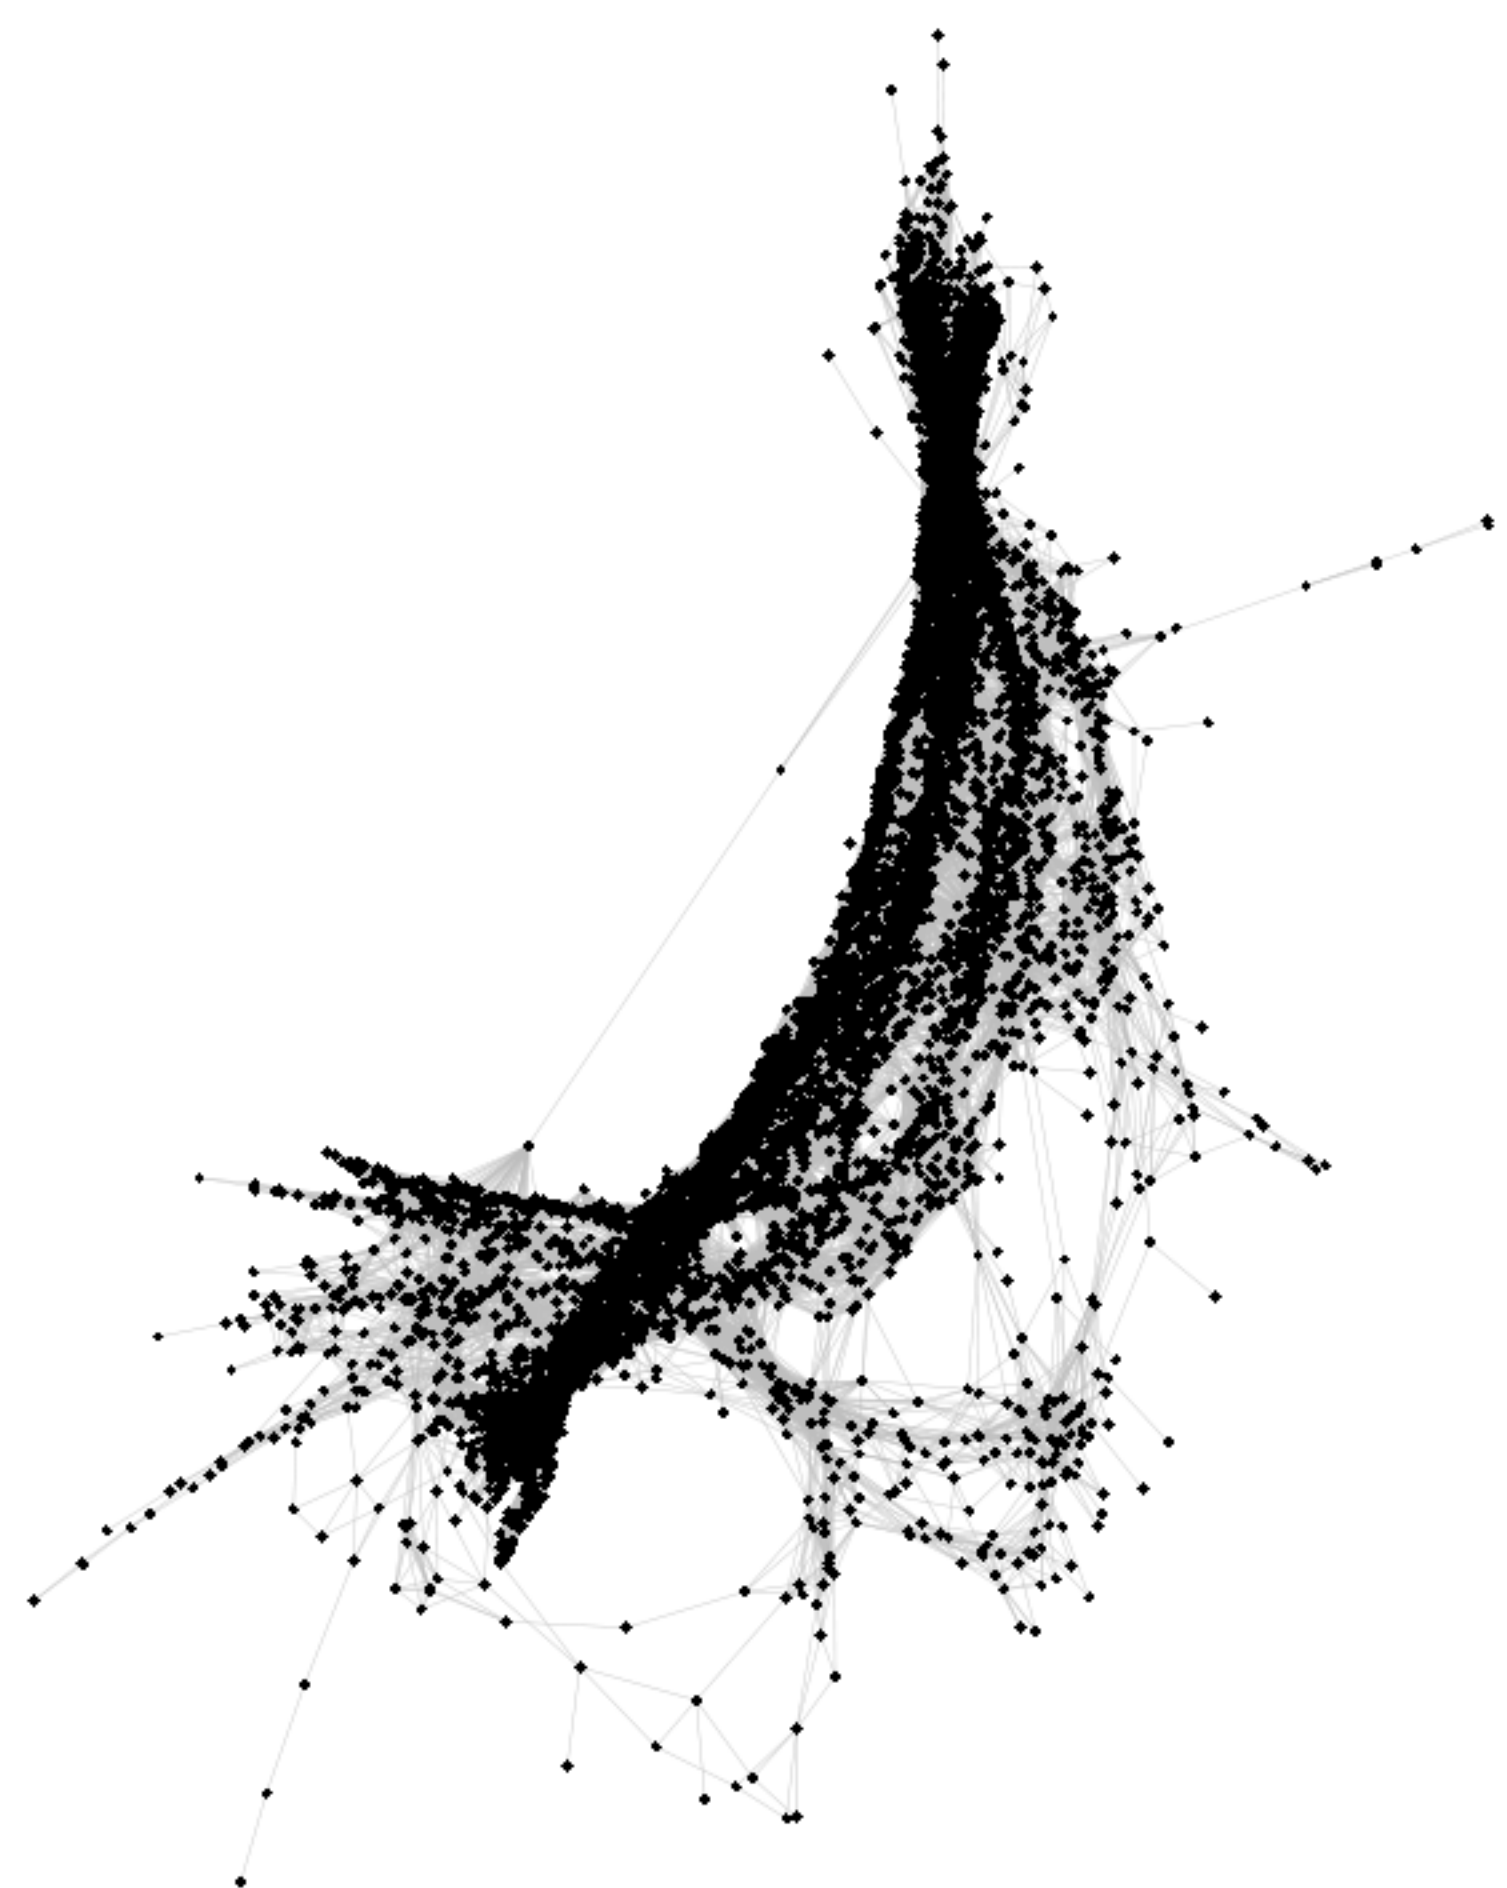

**CL41**

Number of reads: 9816  
Number of pairs: 844615  
Density: 0.01753  
Diameter: NA  
Mean edge weigth: 162.62  
Max. degree: 564

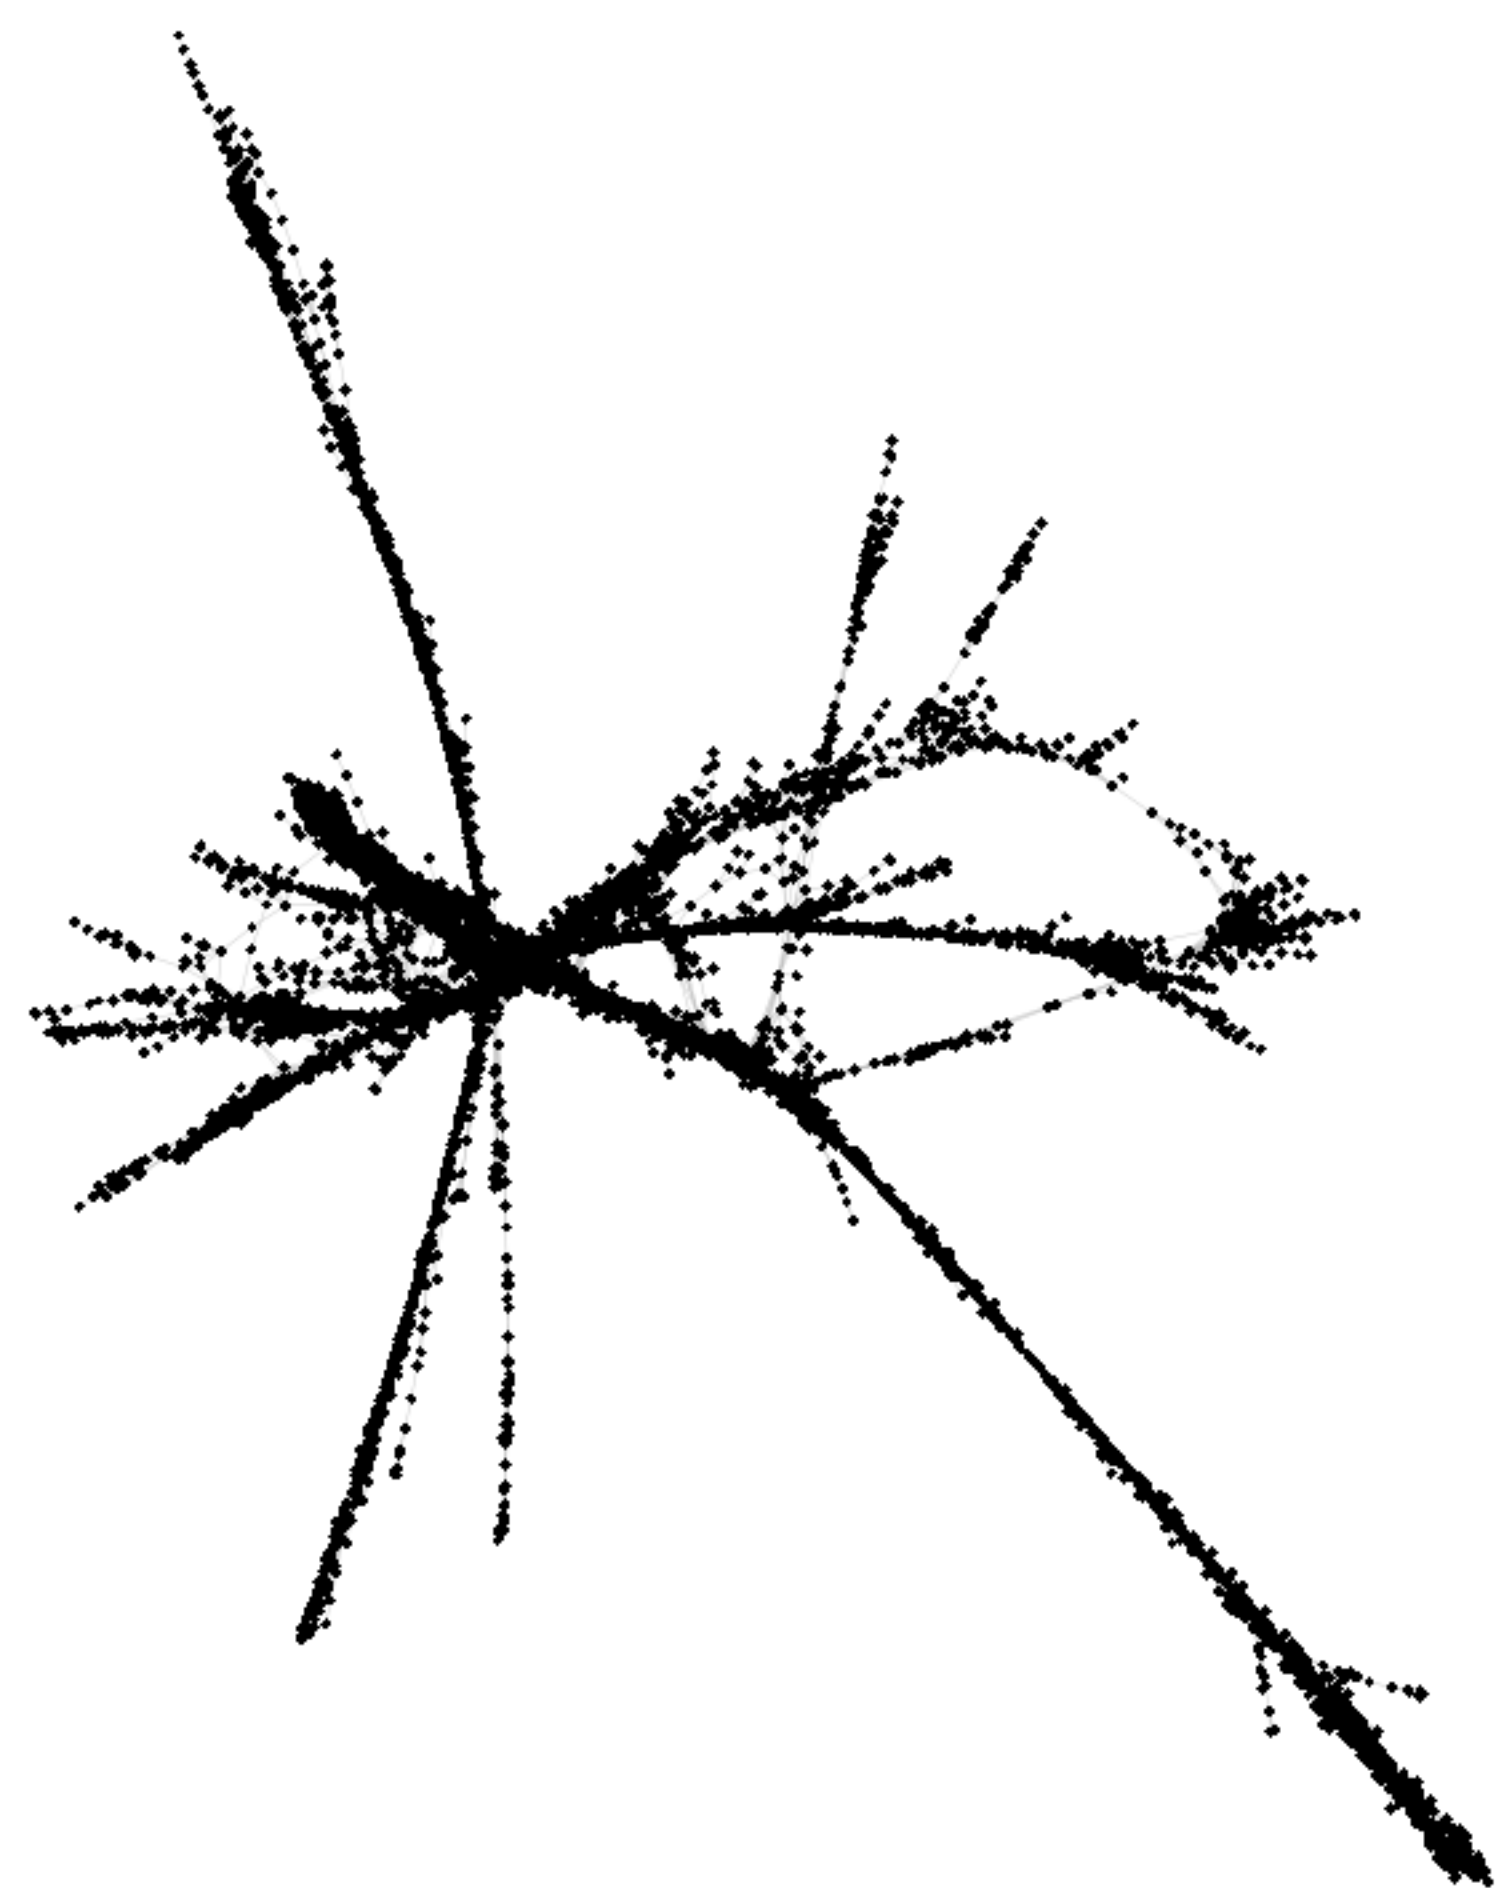

**CL42**

Number of reads: 9710  
Number of pairs: 204335  
Density: 0.004335  
Diameter: NA  
Mean edge weigth: 157.09  
Max. degree: 214

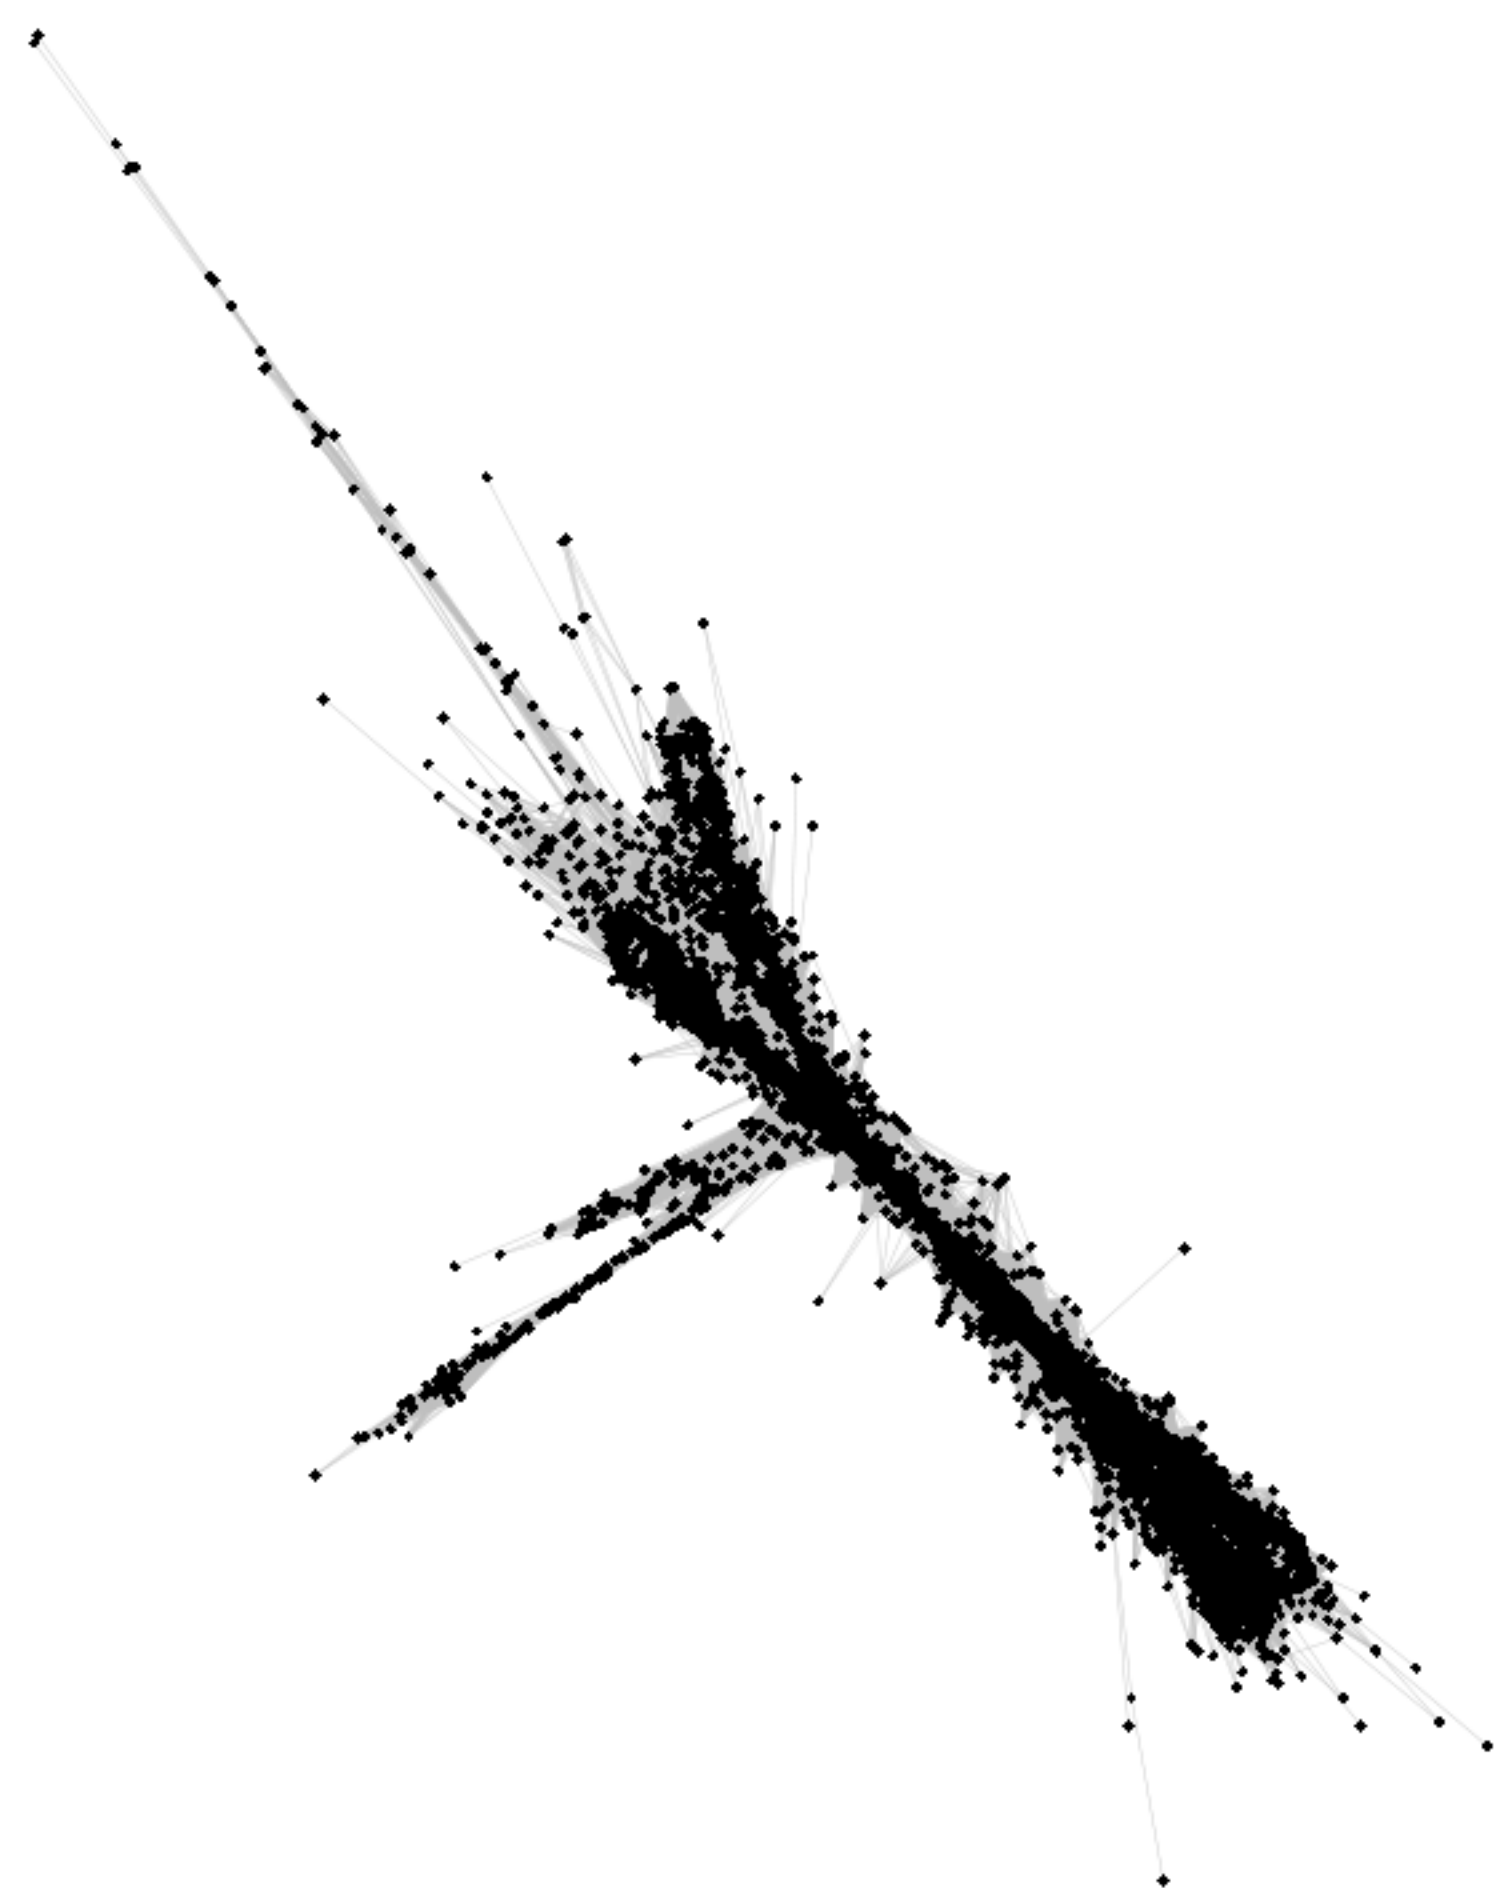

**CL43**

Number of reads: 9527  
Number of pairs: 3824824  
Density: 0.08429  
Diameter: NA  
Mean edge weigth: 164.84  
Max. degree: 1479

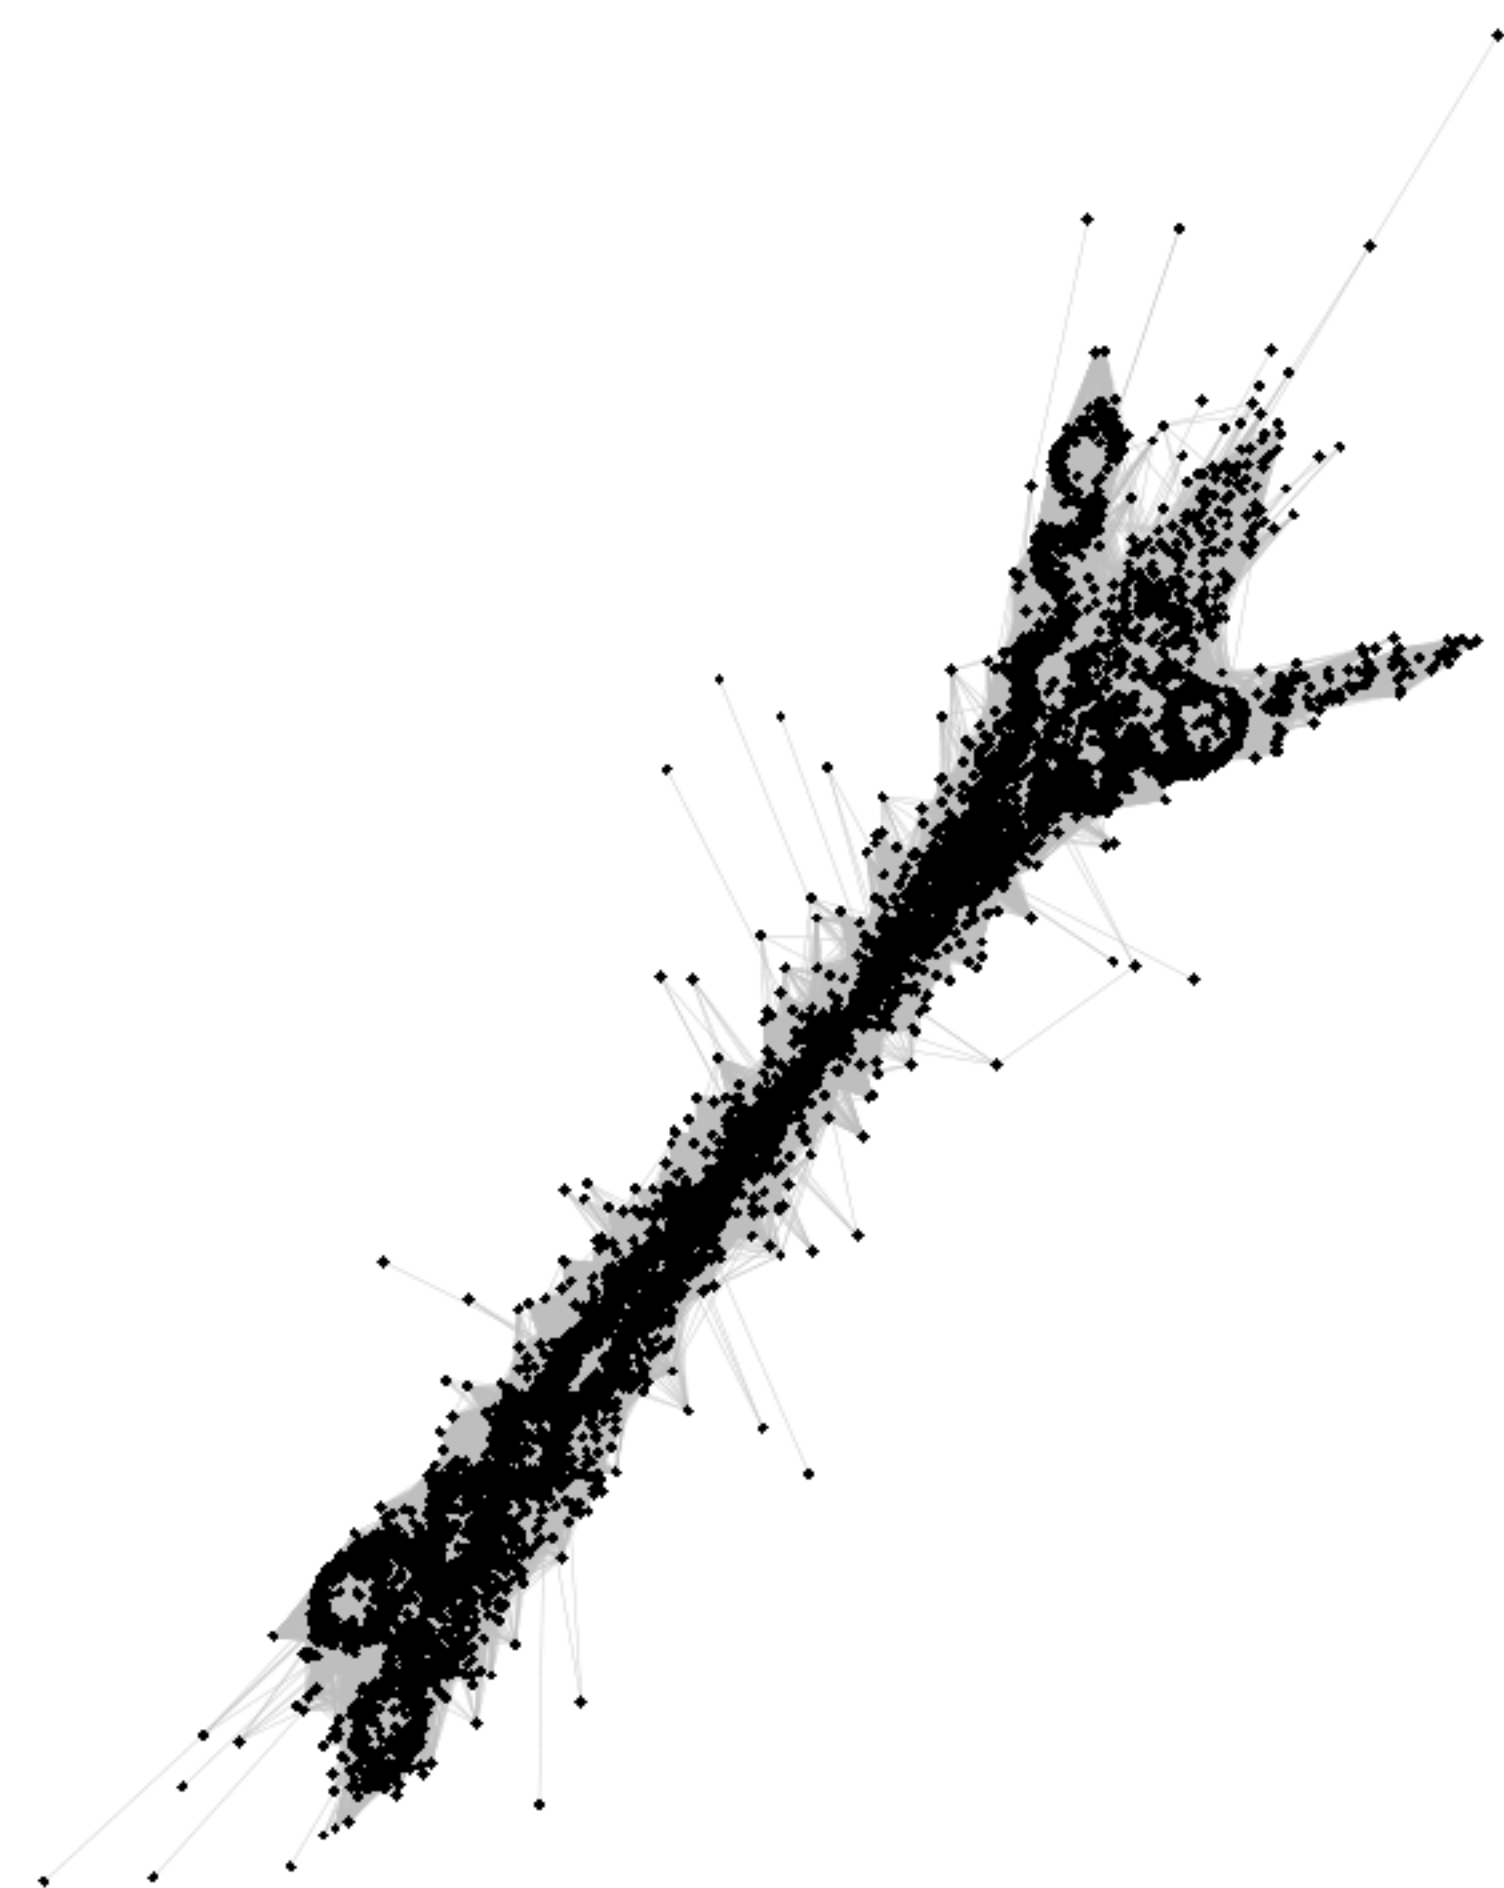

**CL44**

Number of reads: 9482  
Number of pairs: 3887334  
Density: 0.08648  
Diameter: NA  
Mean edge weigth: 164.22  
Max. degree: 1511

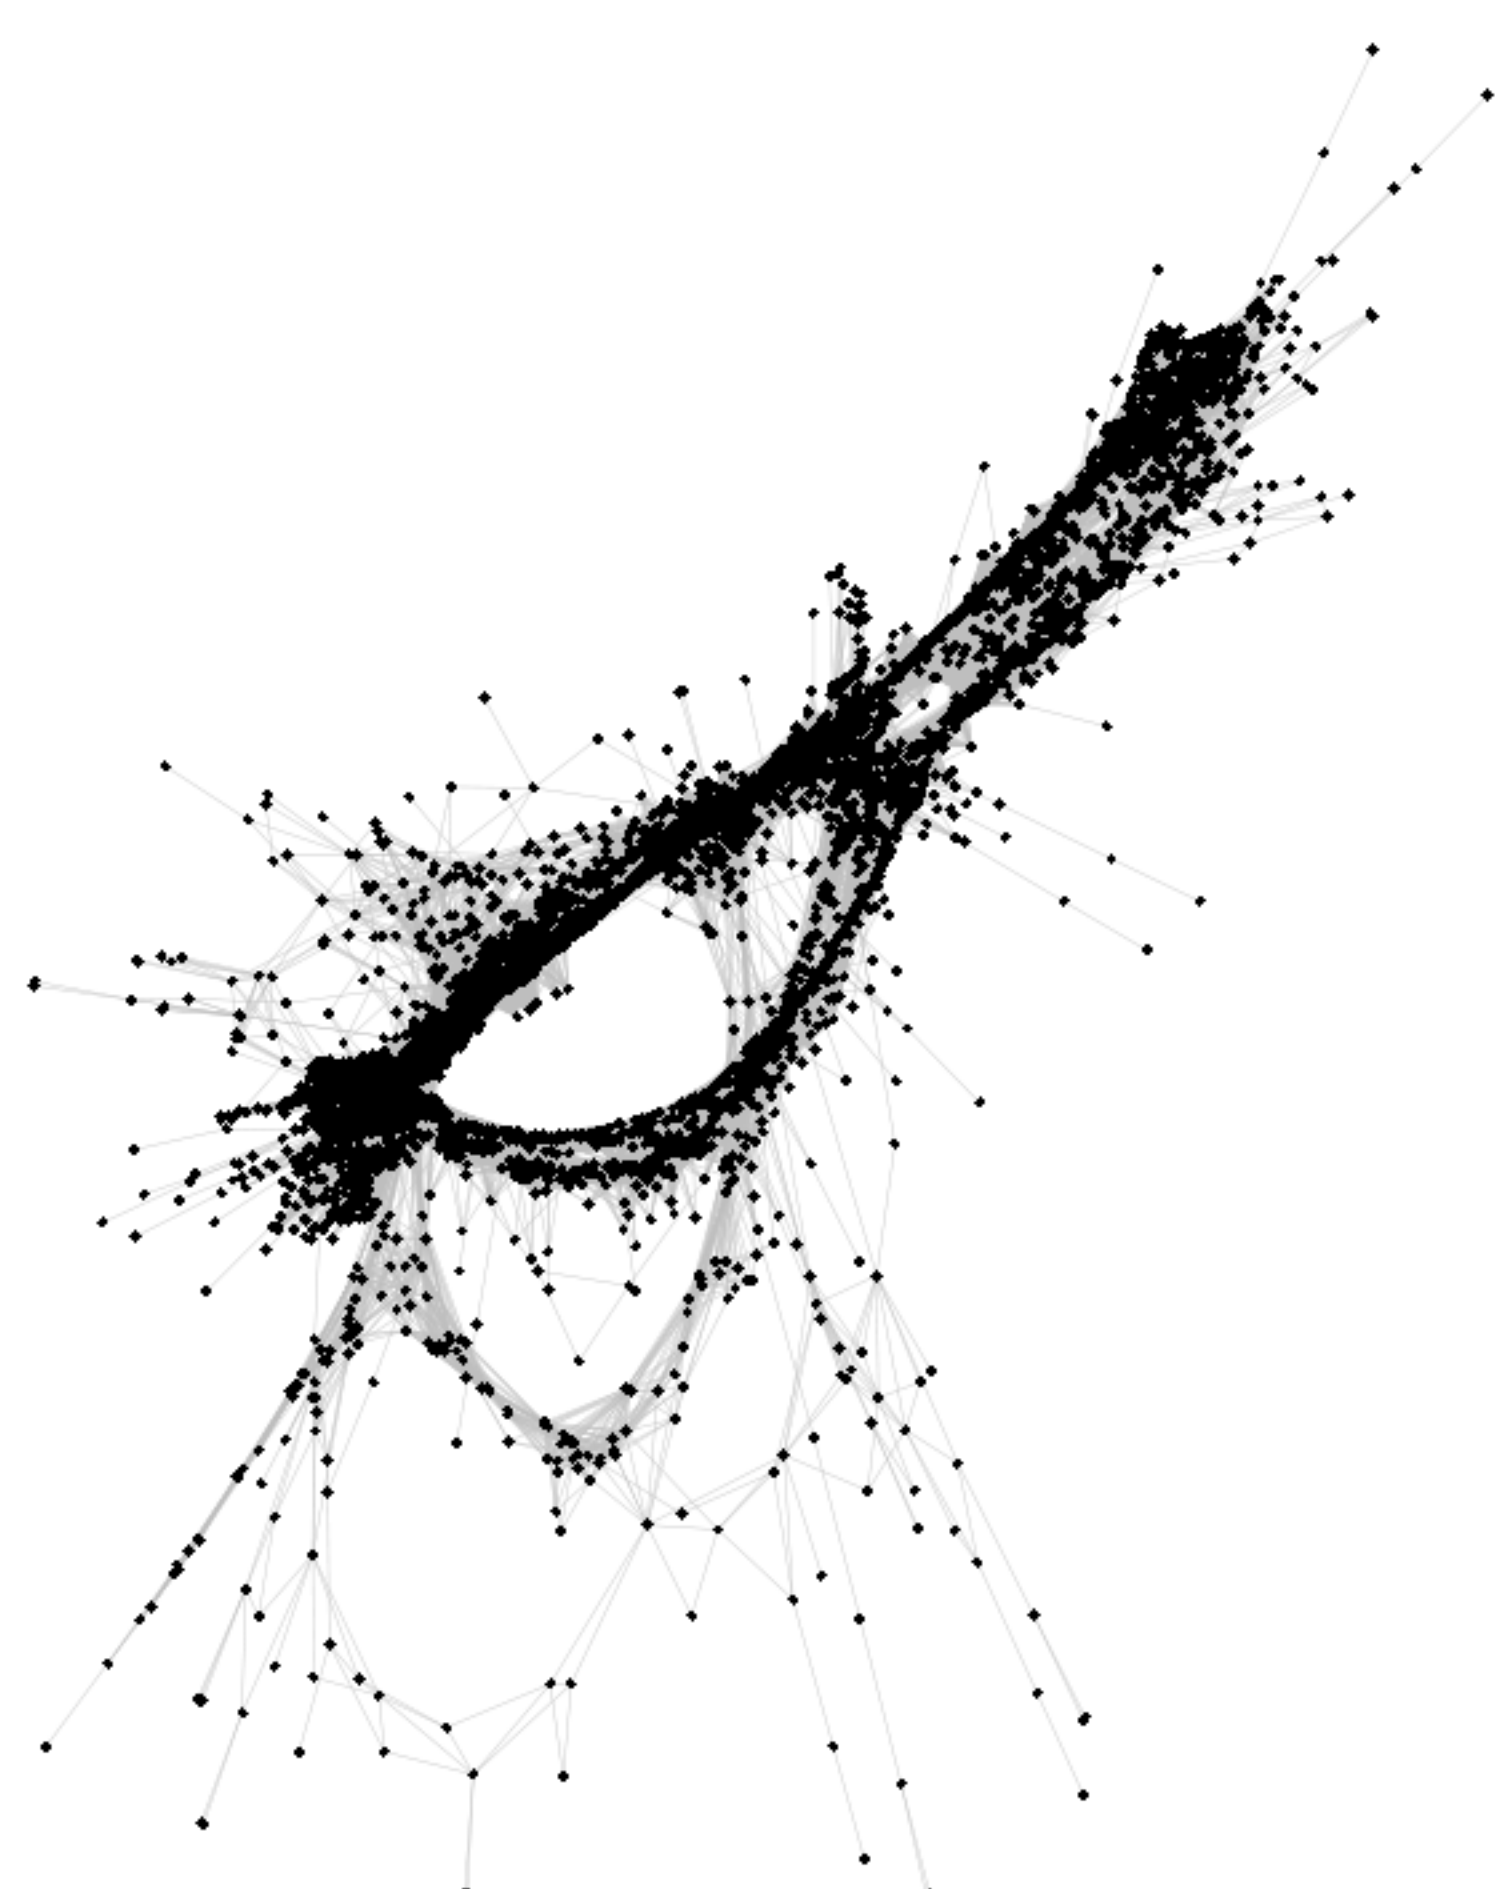

**CL45**

Number of reads: 9348  
Number of pairs: 1665060  
Density: 0.03811  
Diameter: NA  
Mean edge weigth: 159.83  
Max. degree: 1310

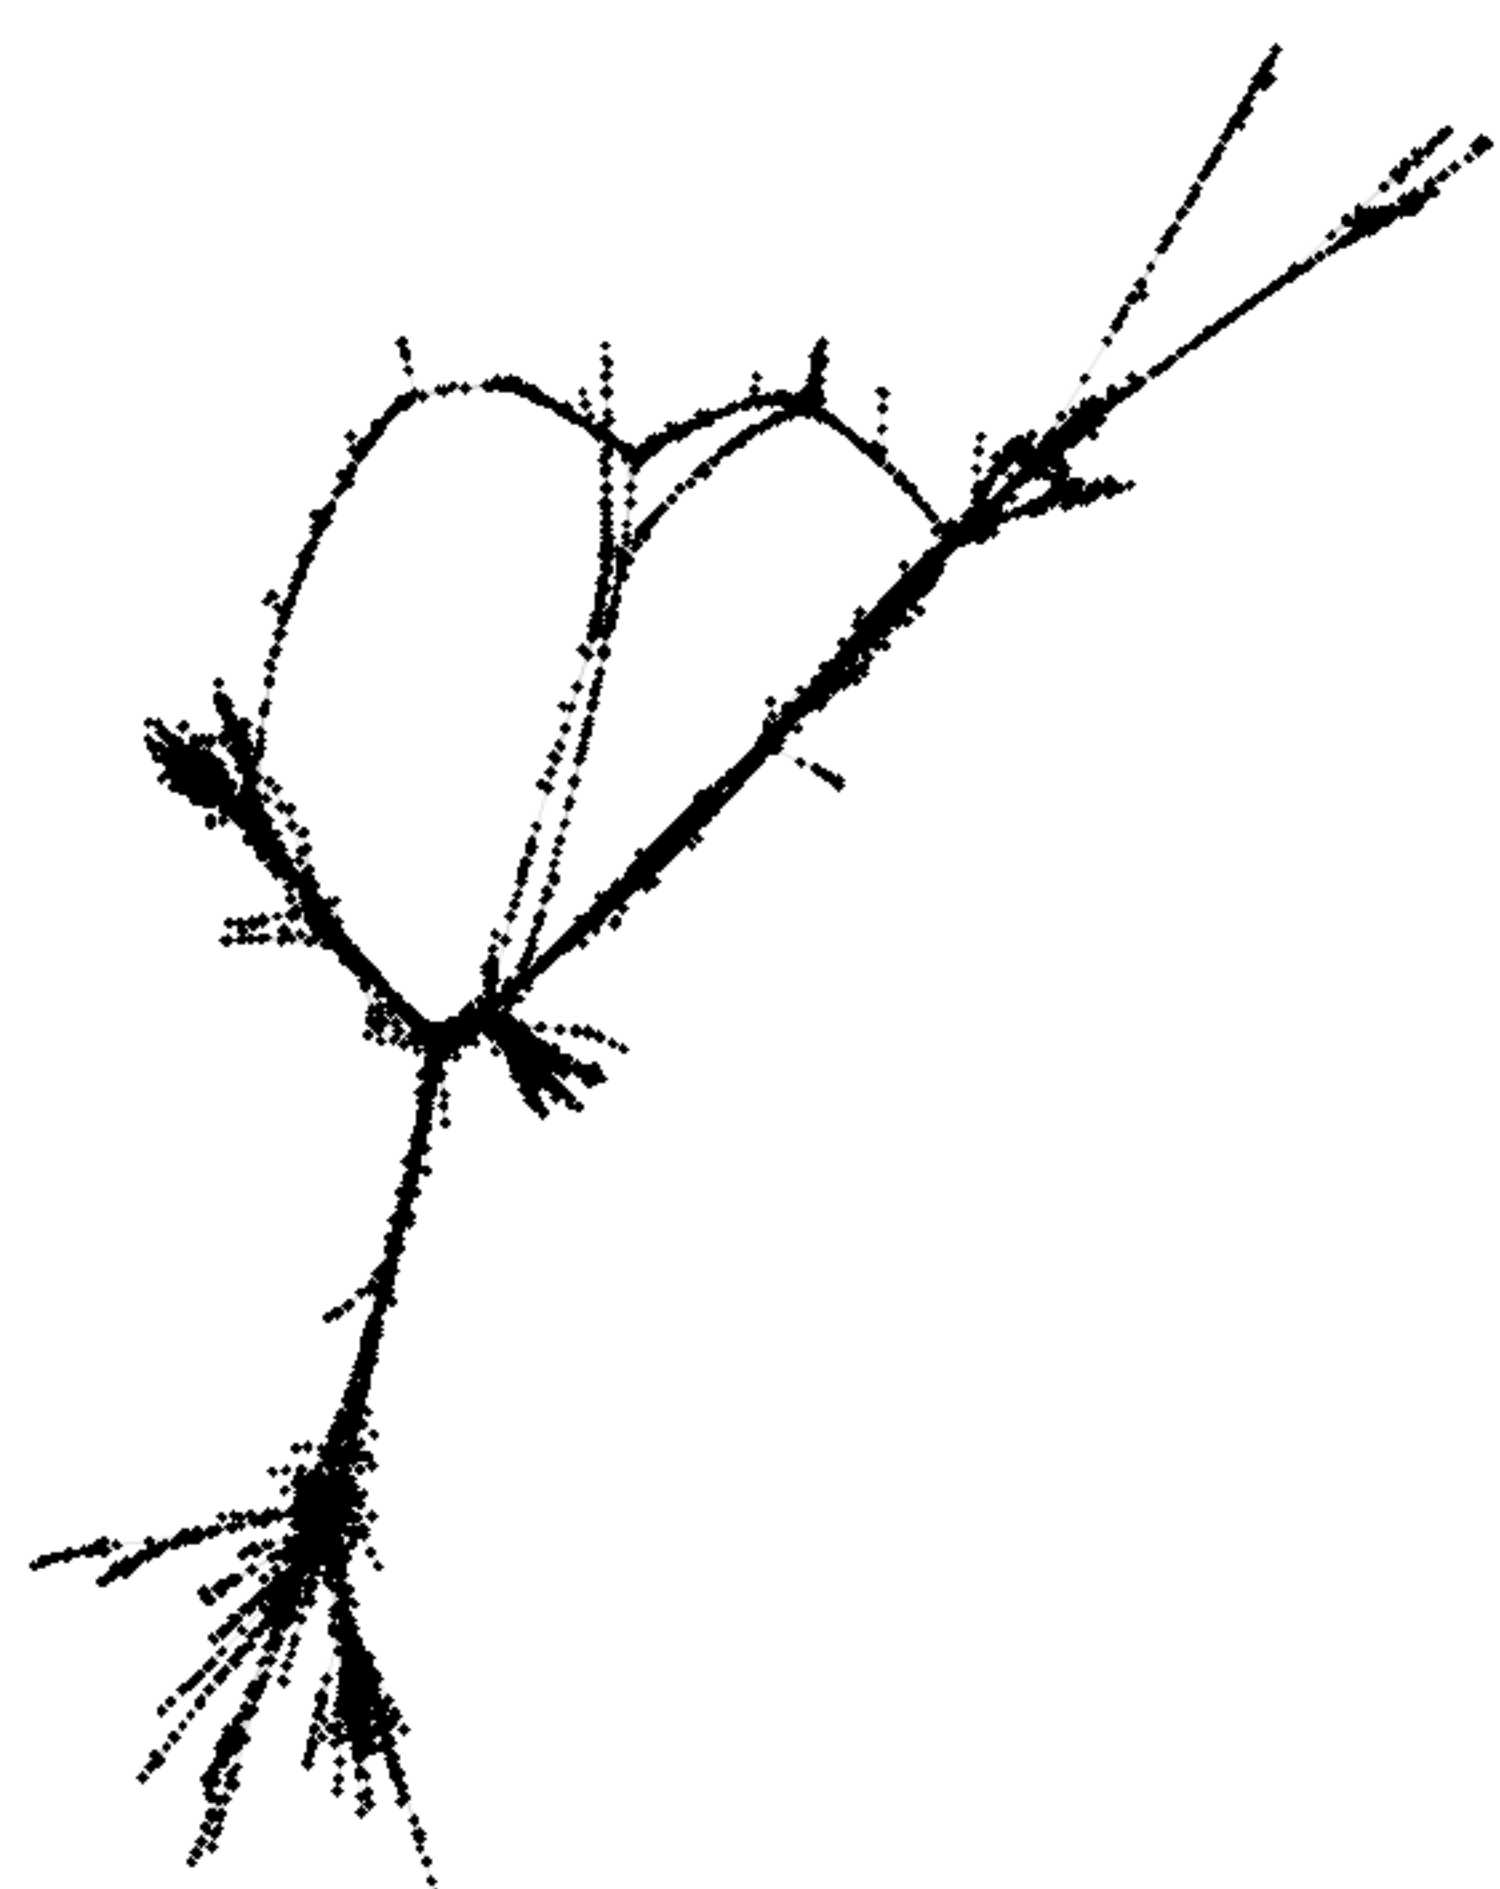

**CL46**

Number of reads: 9289  
Number of pairs: 256012  
Density: 0.005935  
Diameter: NA  
Mean edge weigth: 164.67  
Max. degree: 284

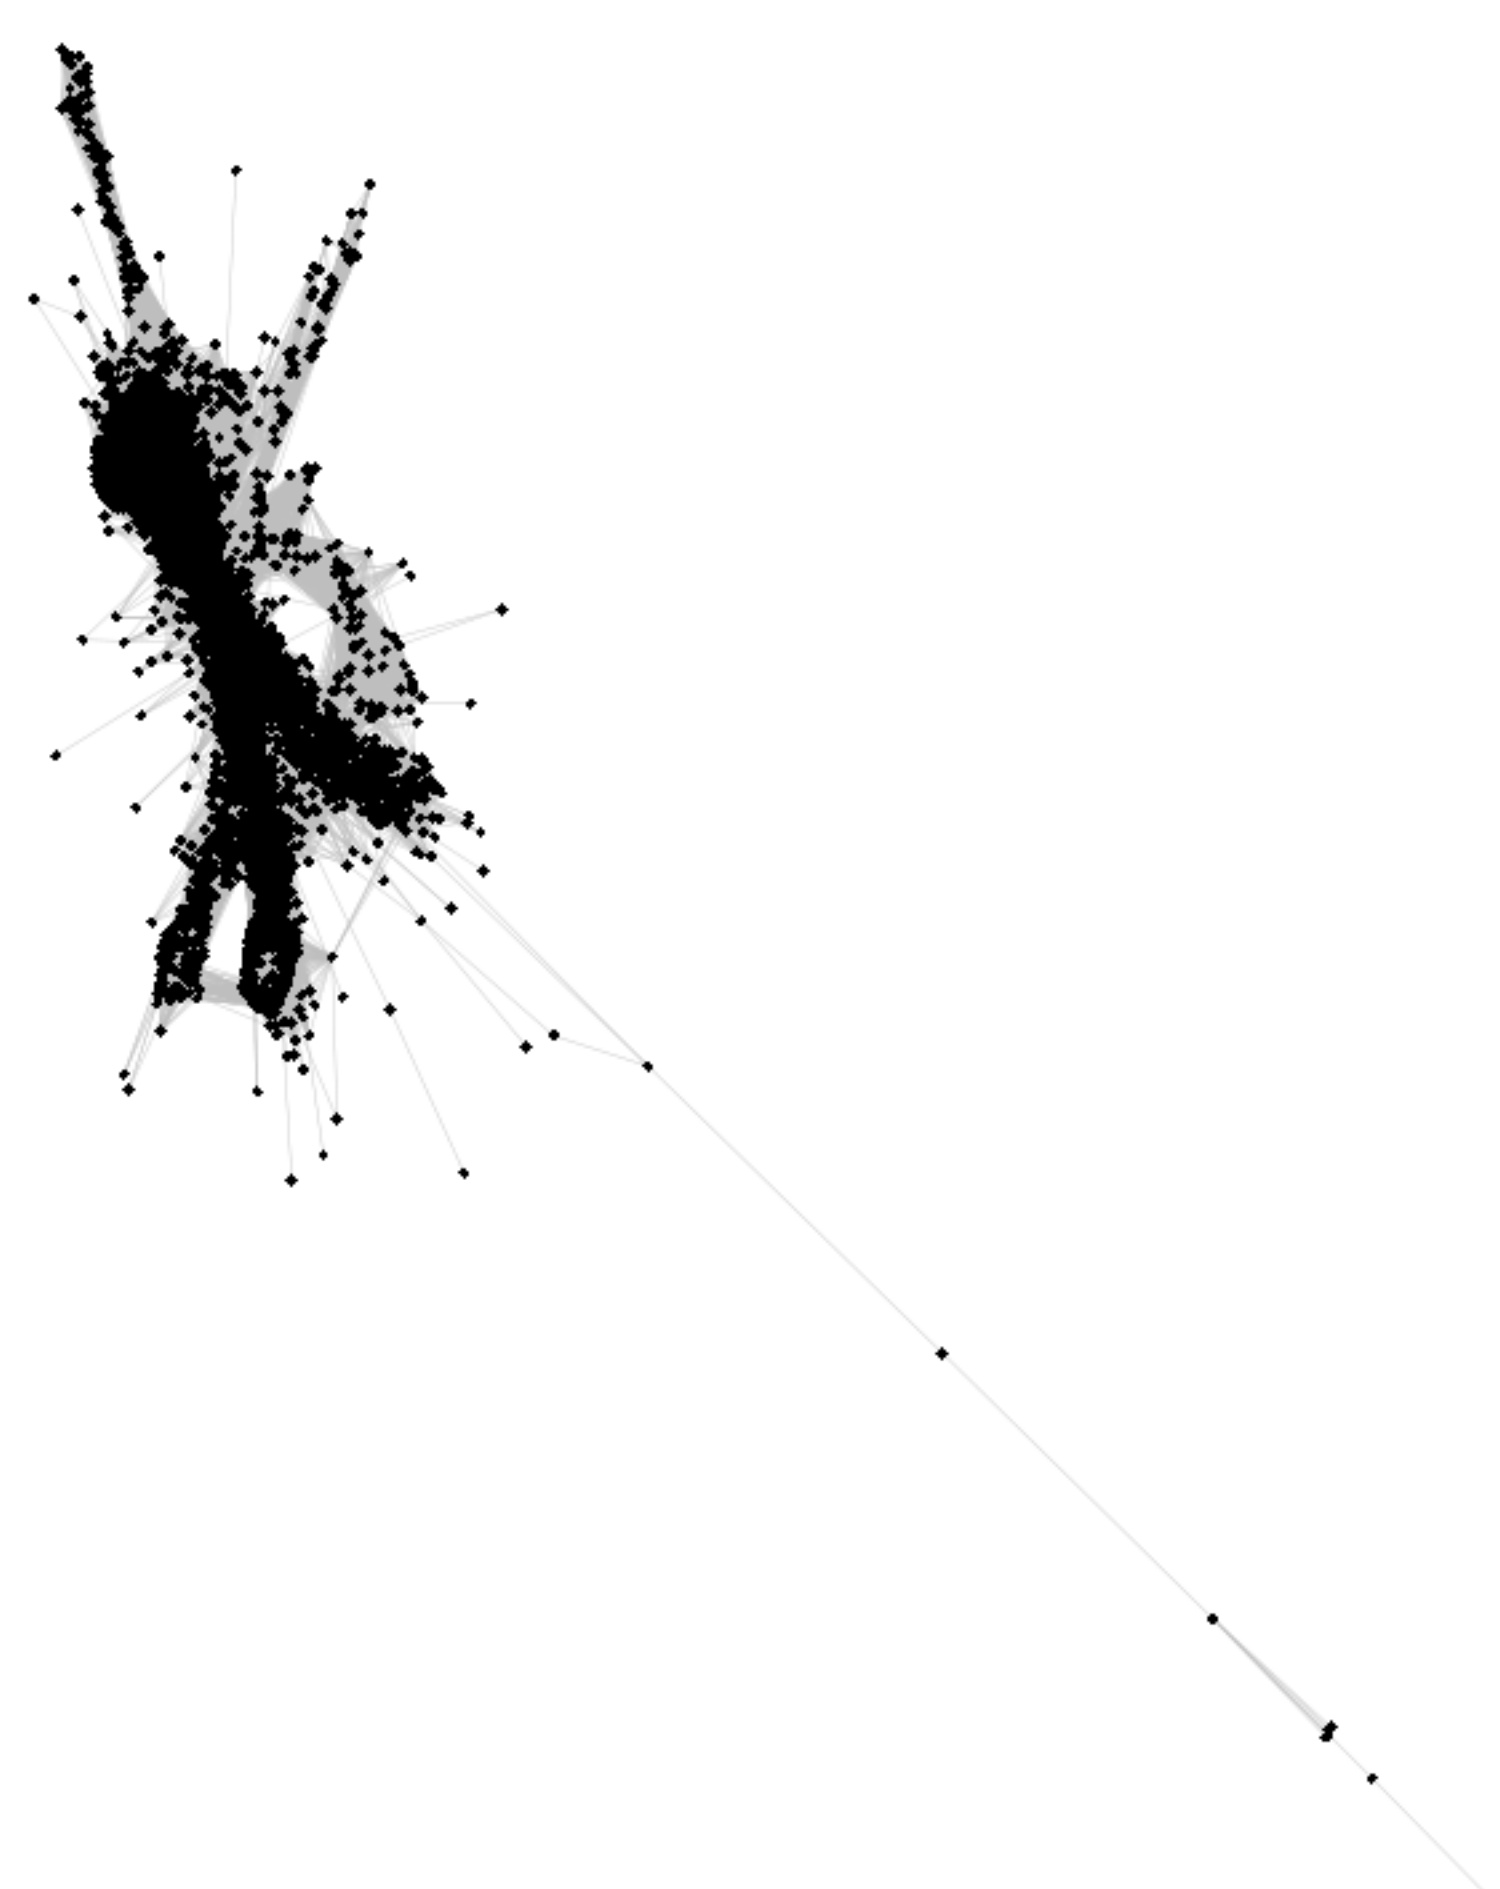

**CL47**

Number of reads: 9284  
Number of pairs: 4711641  
Density: 0.1093  
Diameter: NA  
Mean edge weigth: 165.48  
Max. degree: 2182

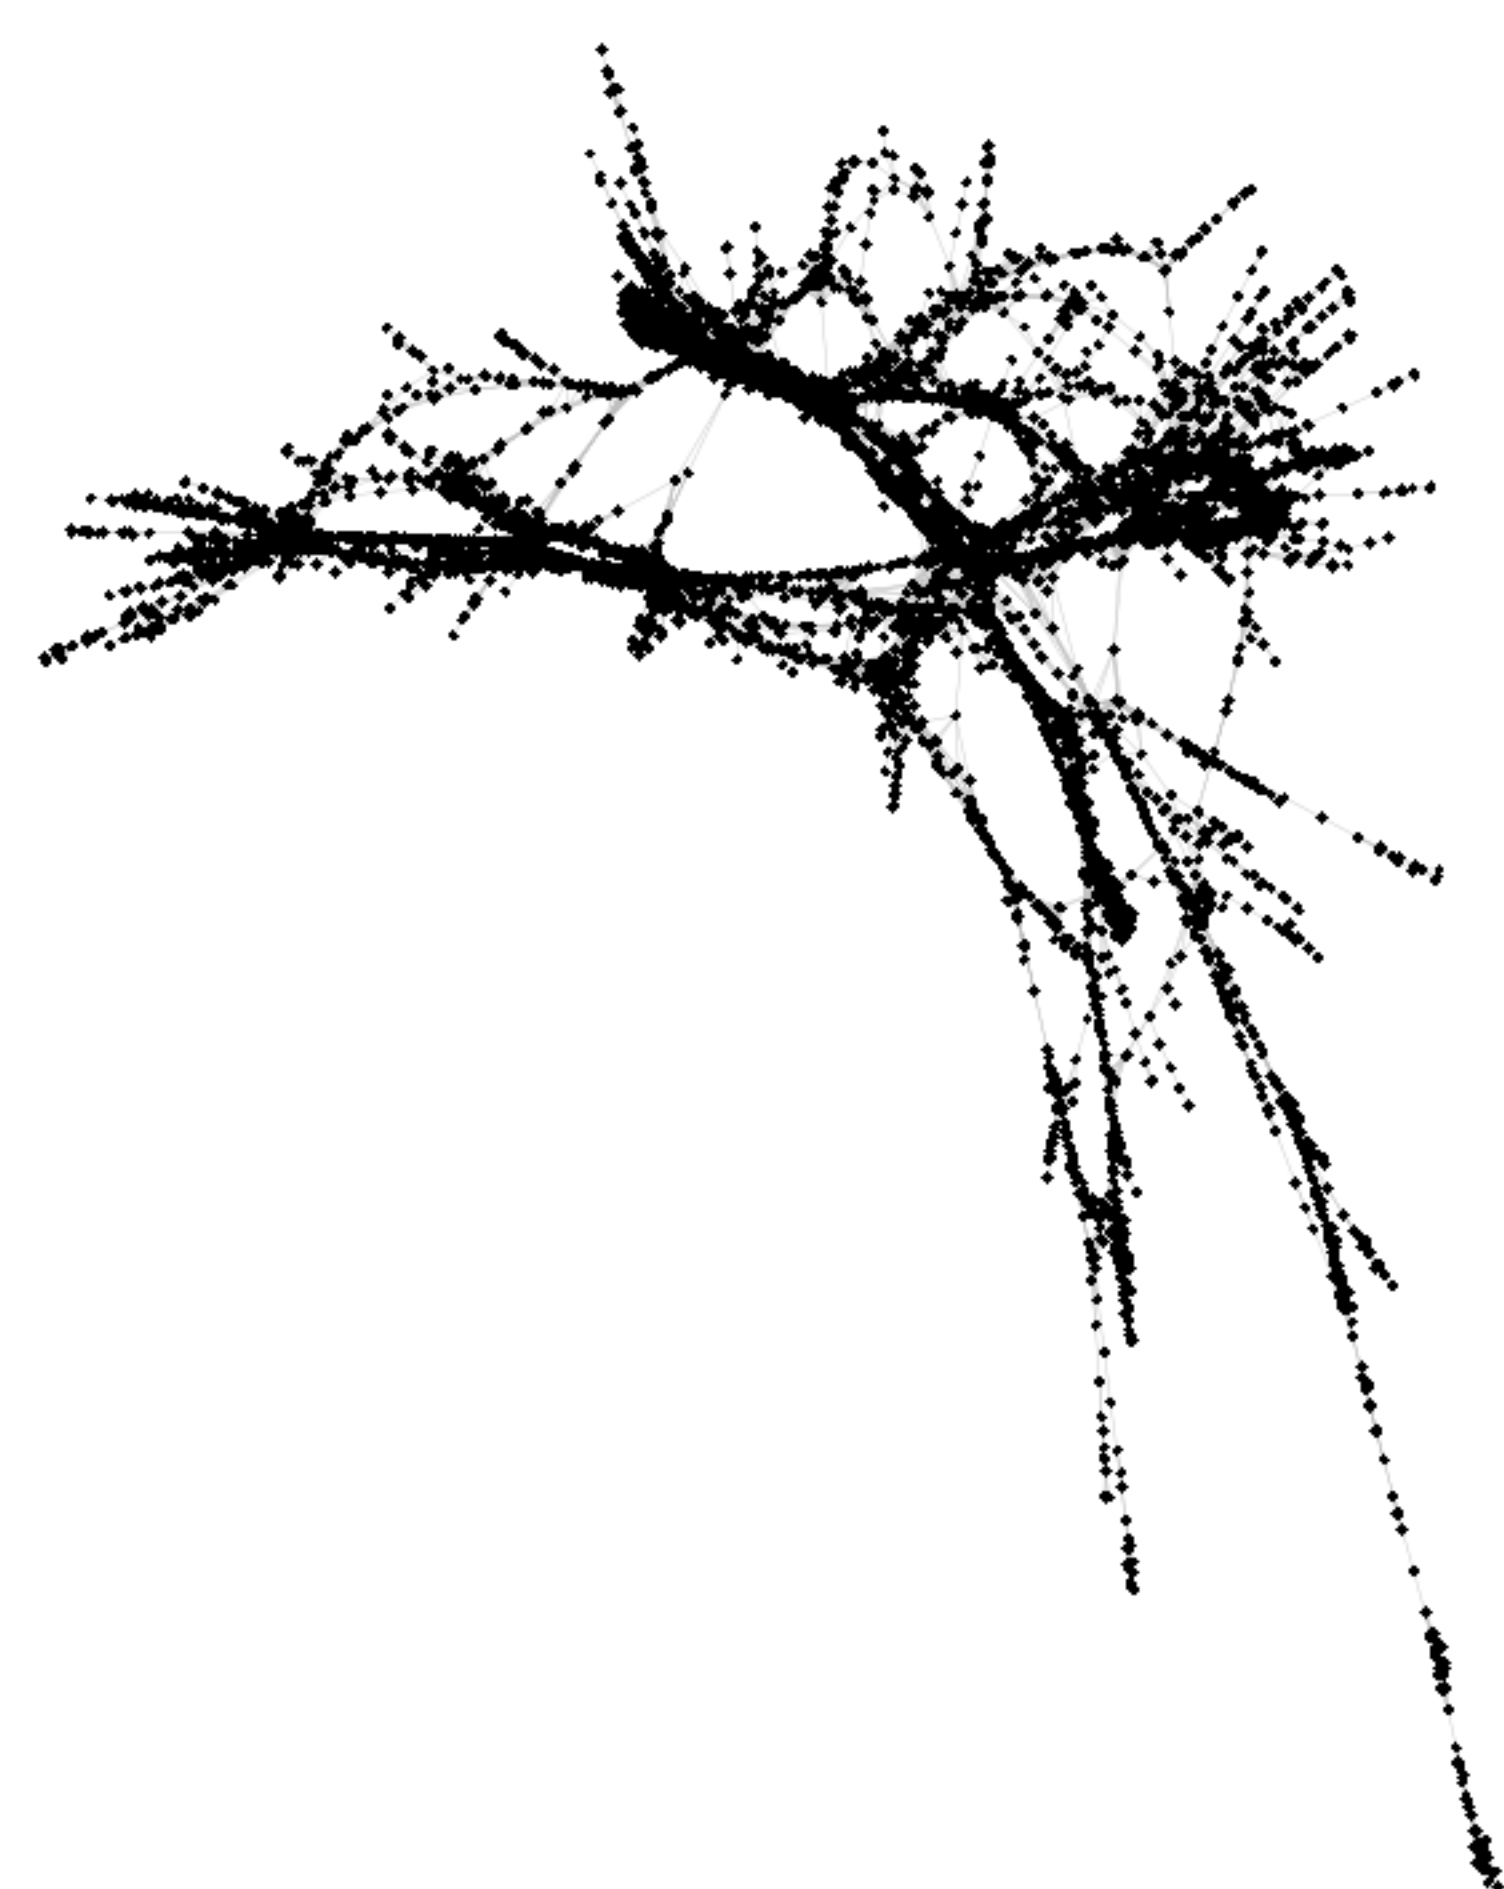

**CL48**

Number of reads: 9266  
Number of pairs: 173654  
Density: 0.004046  
Diameter: NA  
Mean edge weigth: 156.78  
Max. degree: 269

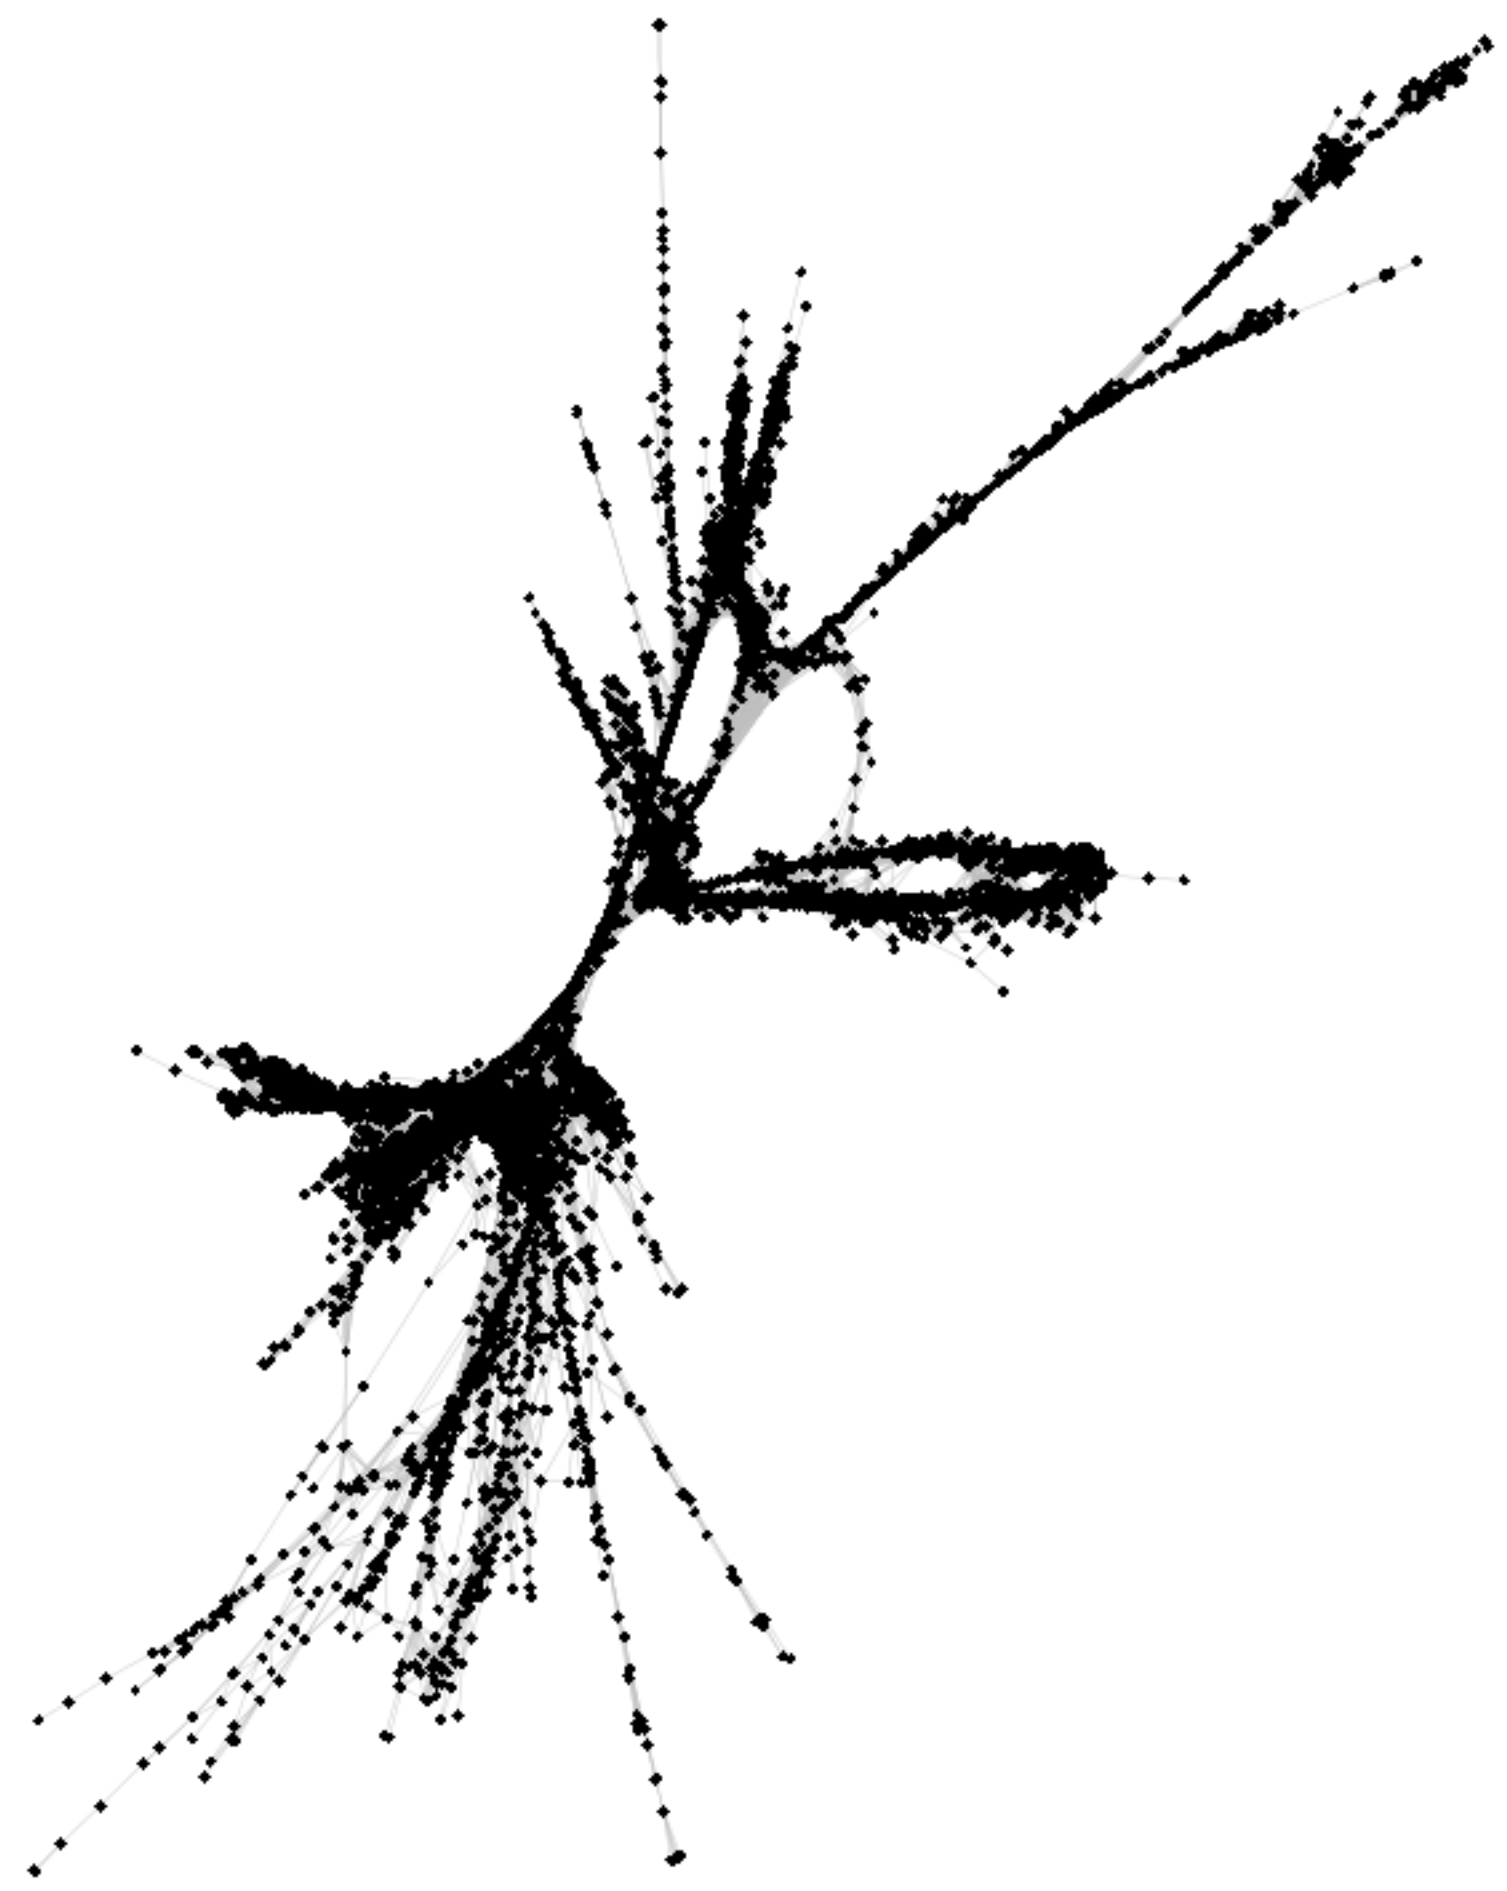

**CL49**

Number of reads: 9210  
Number of pairs: 505955  
Density: 0.01193  
Diameter: NA  
Mean edge weigth: 162.74  
Max. degree: 486

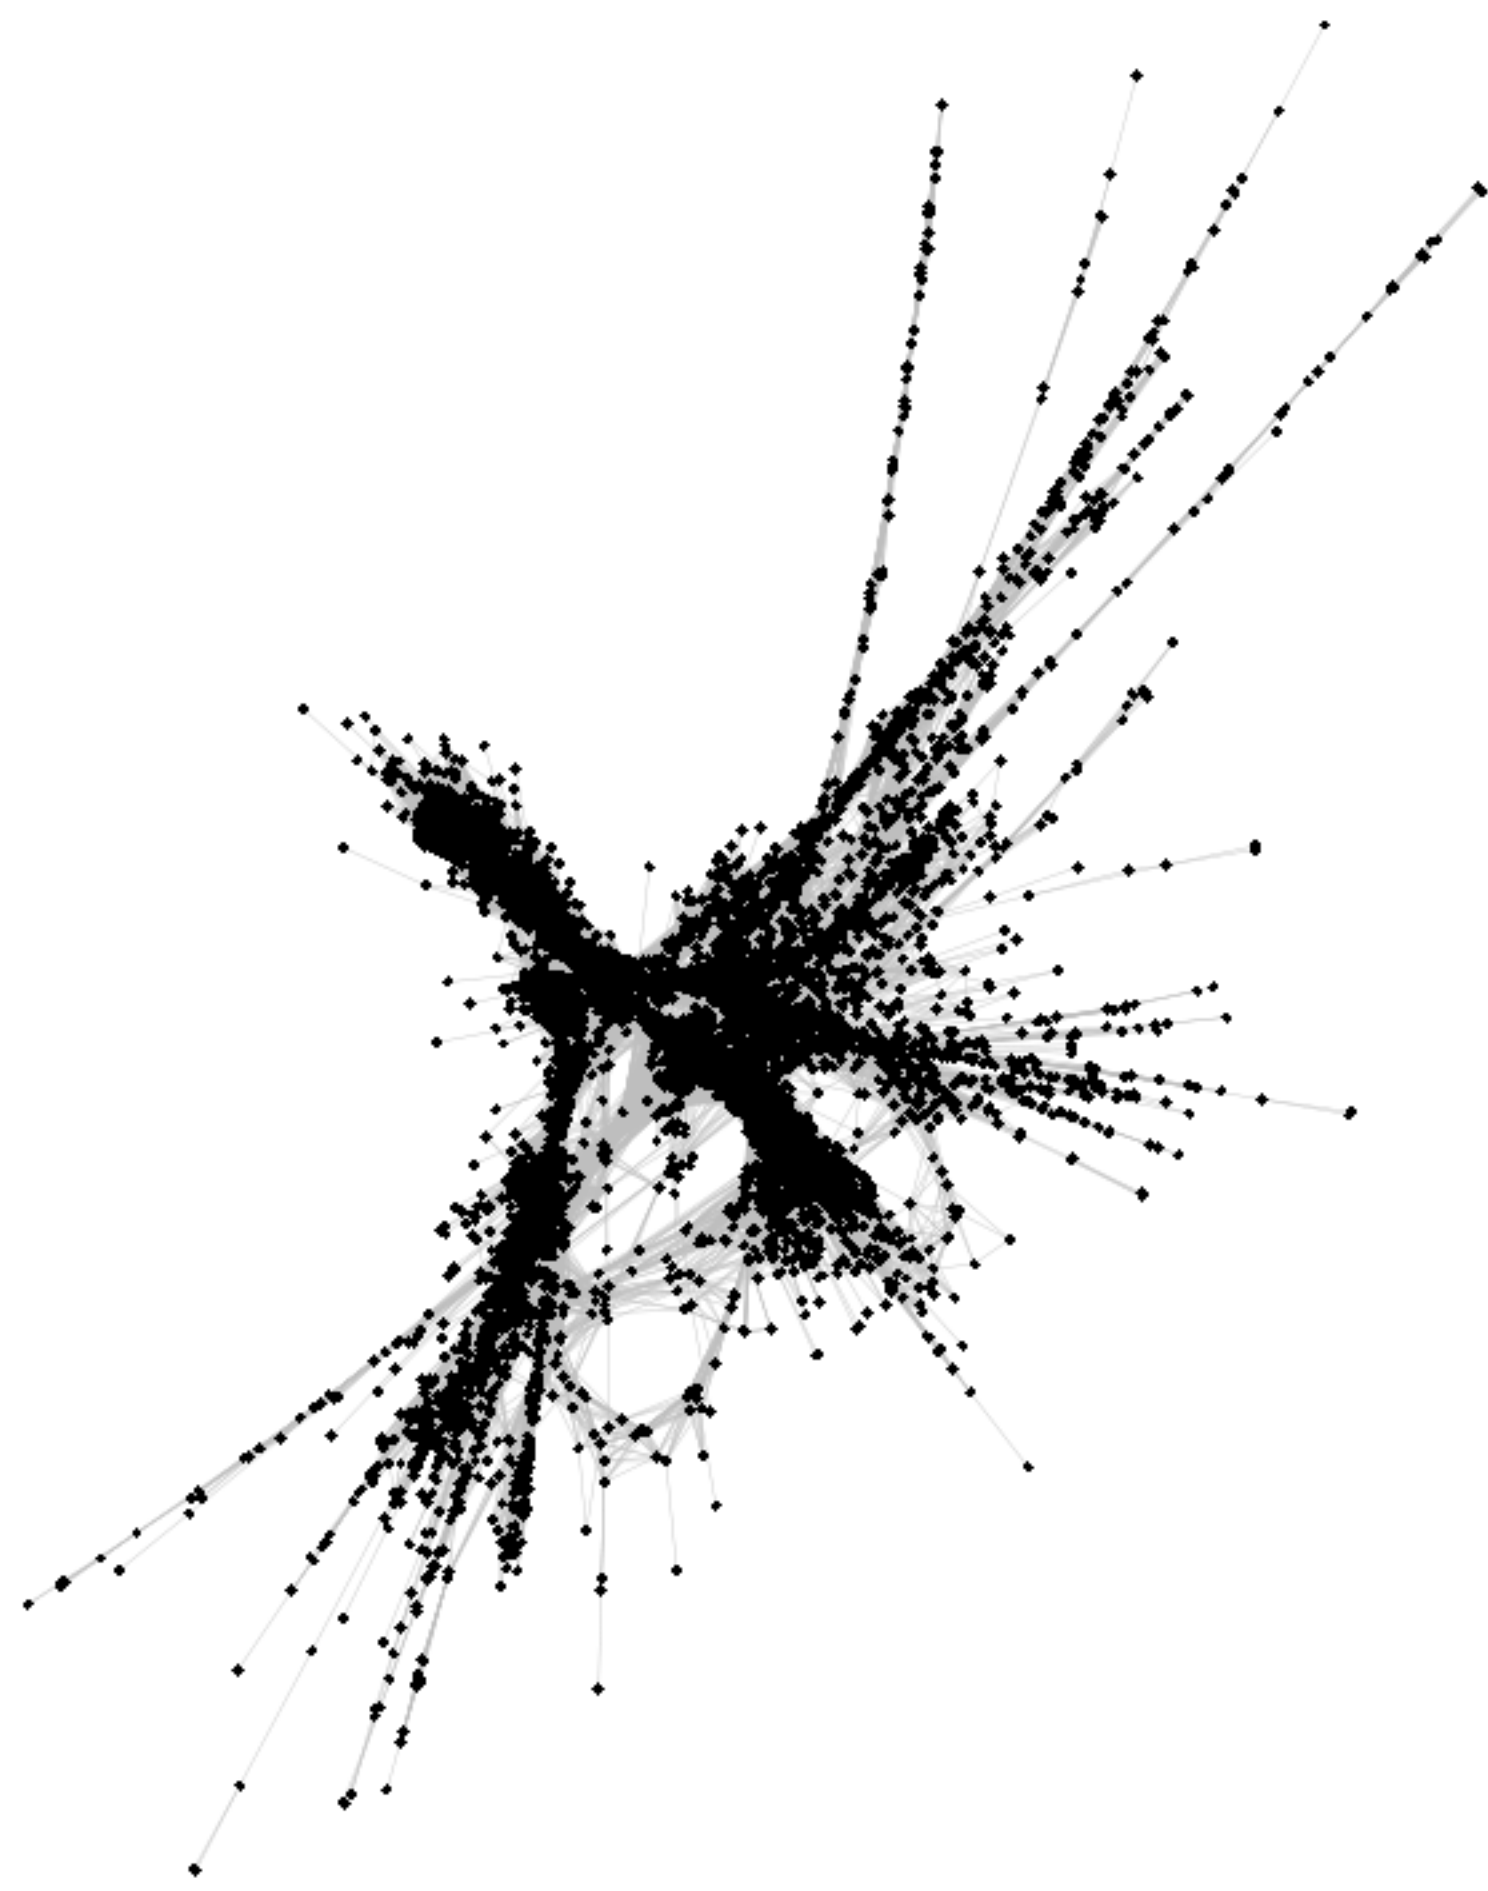

**CL50**

Number of reads: 9171  
Number of pairs: 1178633  
Density: 0.02803  
Diameter: NA  
Mean edge weigth: 158.51  
Max. degree: 934

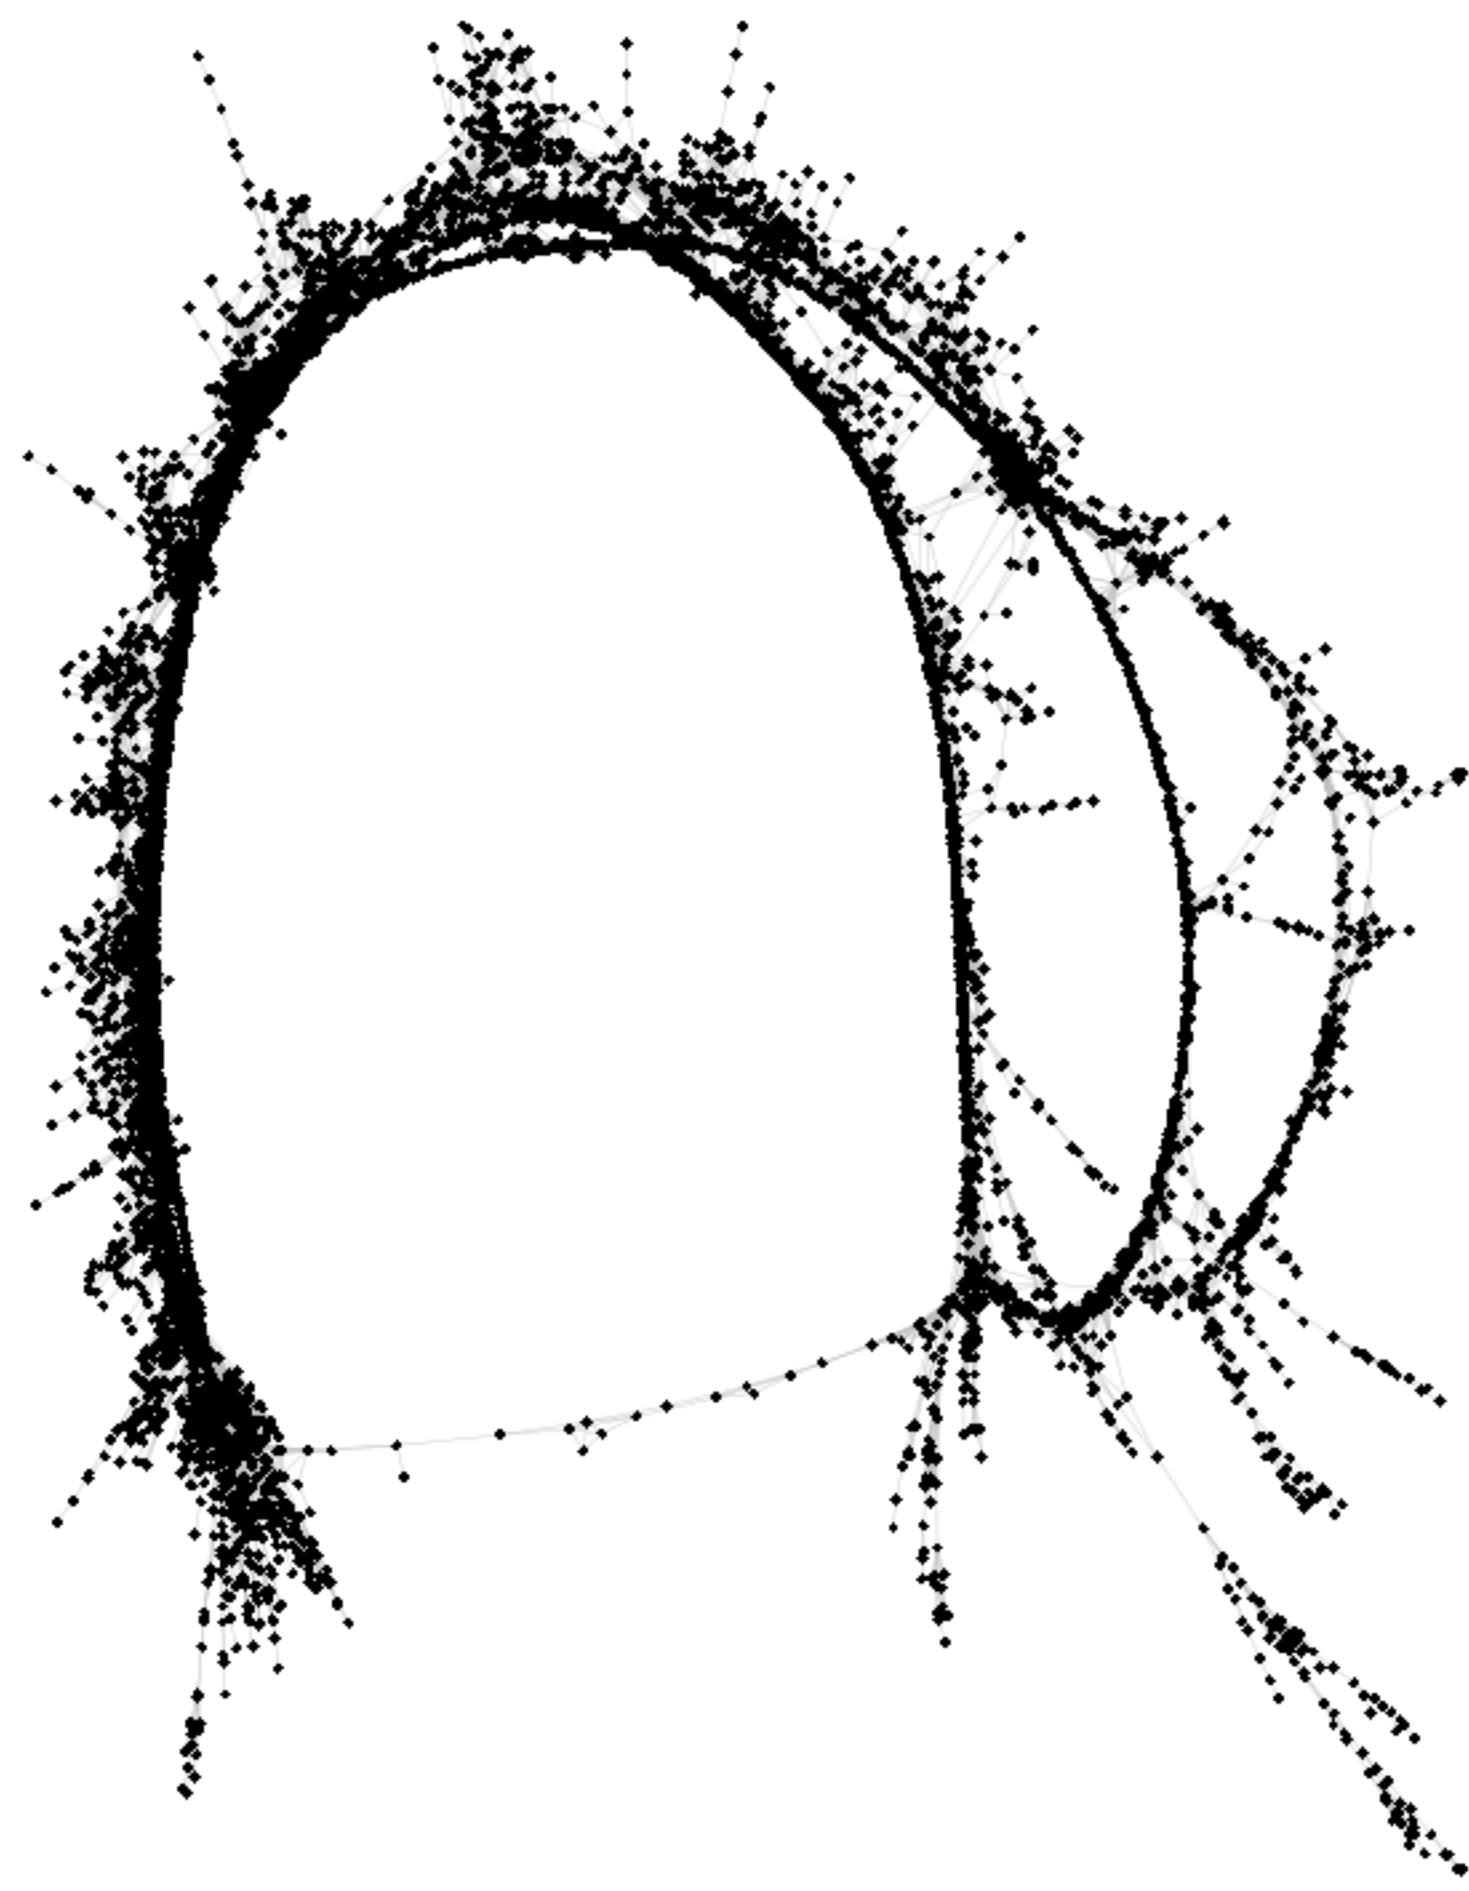

**CL51**

Number of reads: 9086  
Number of pairs: 222345  
Density: 0.005387  
Diameter: NA  
Mean edge weigth: 161.5  
Max. degree: 231

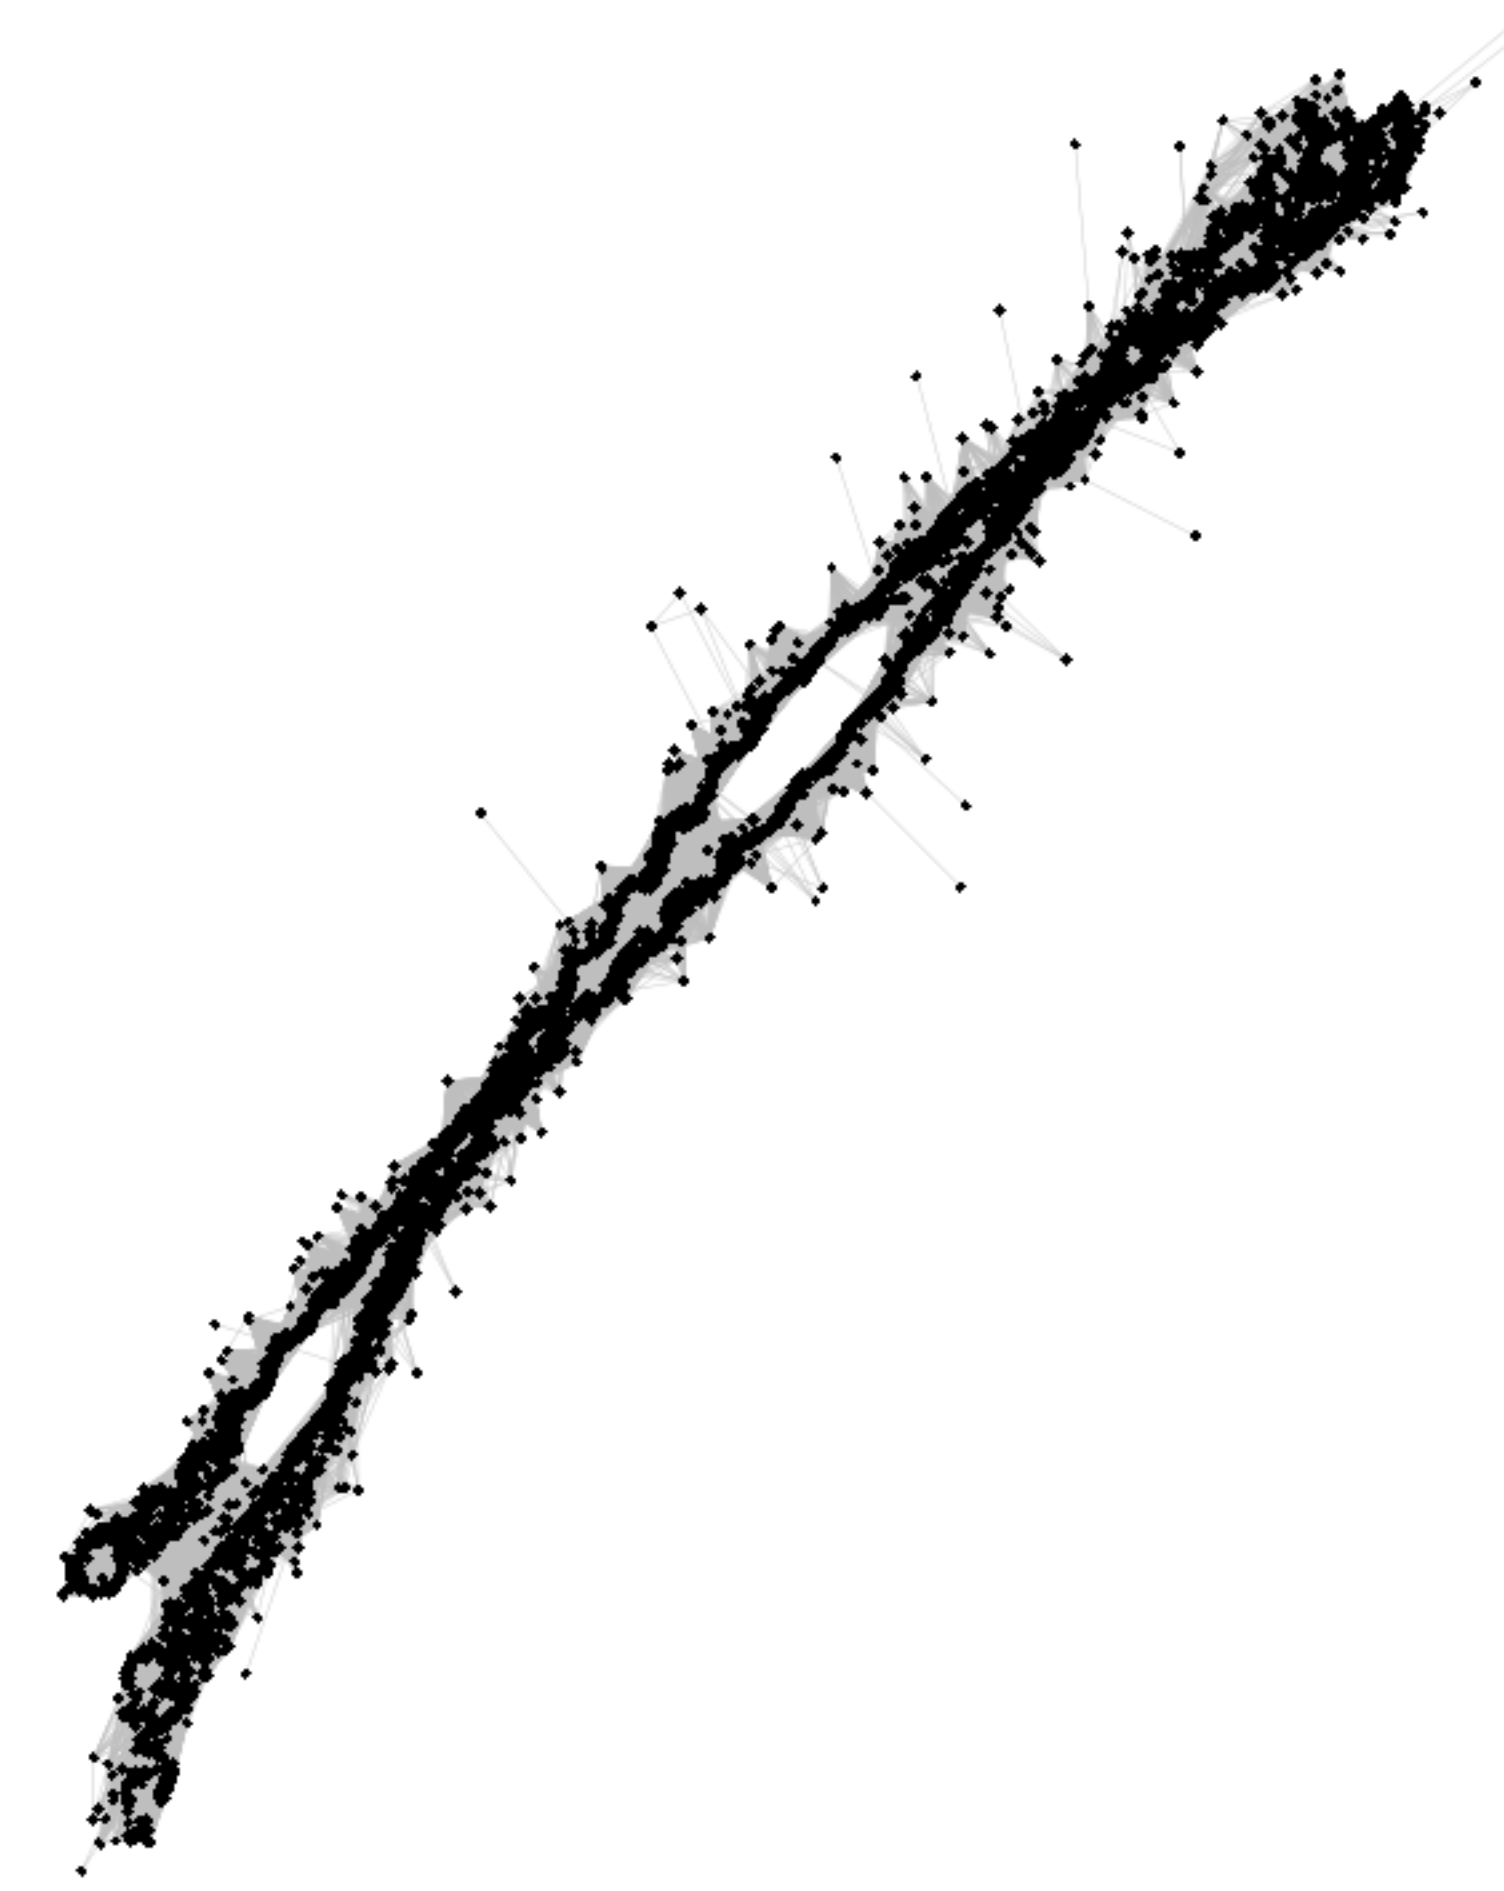

**CL52**

Number of reads: 8922  
Number of pairs: 1559658  
Density: 0.03919  
Diameter: NA  
Mean edge weigth: 168.43  
Max. degree: 766

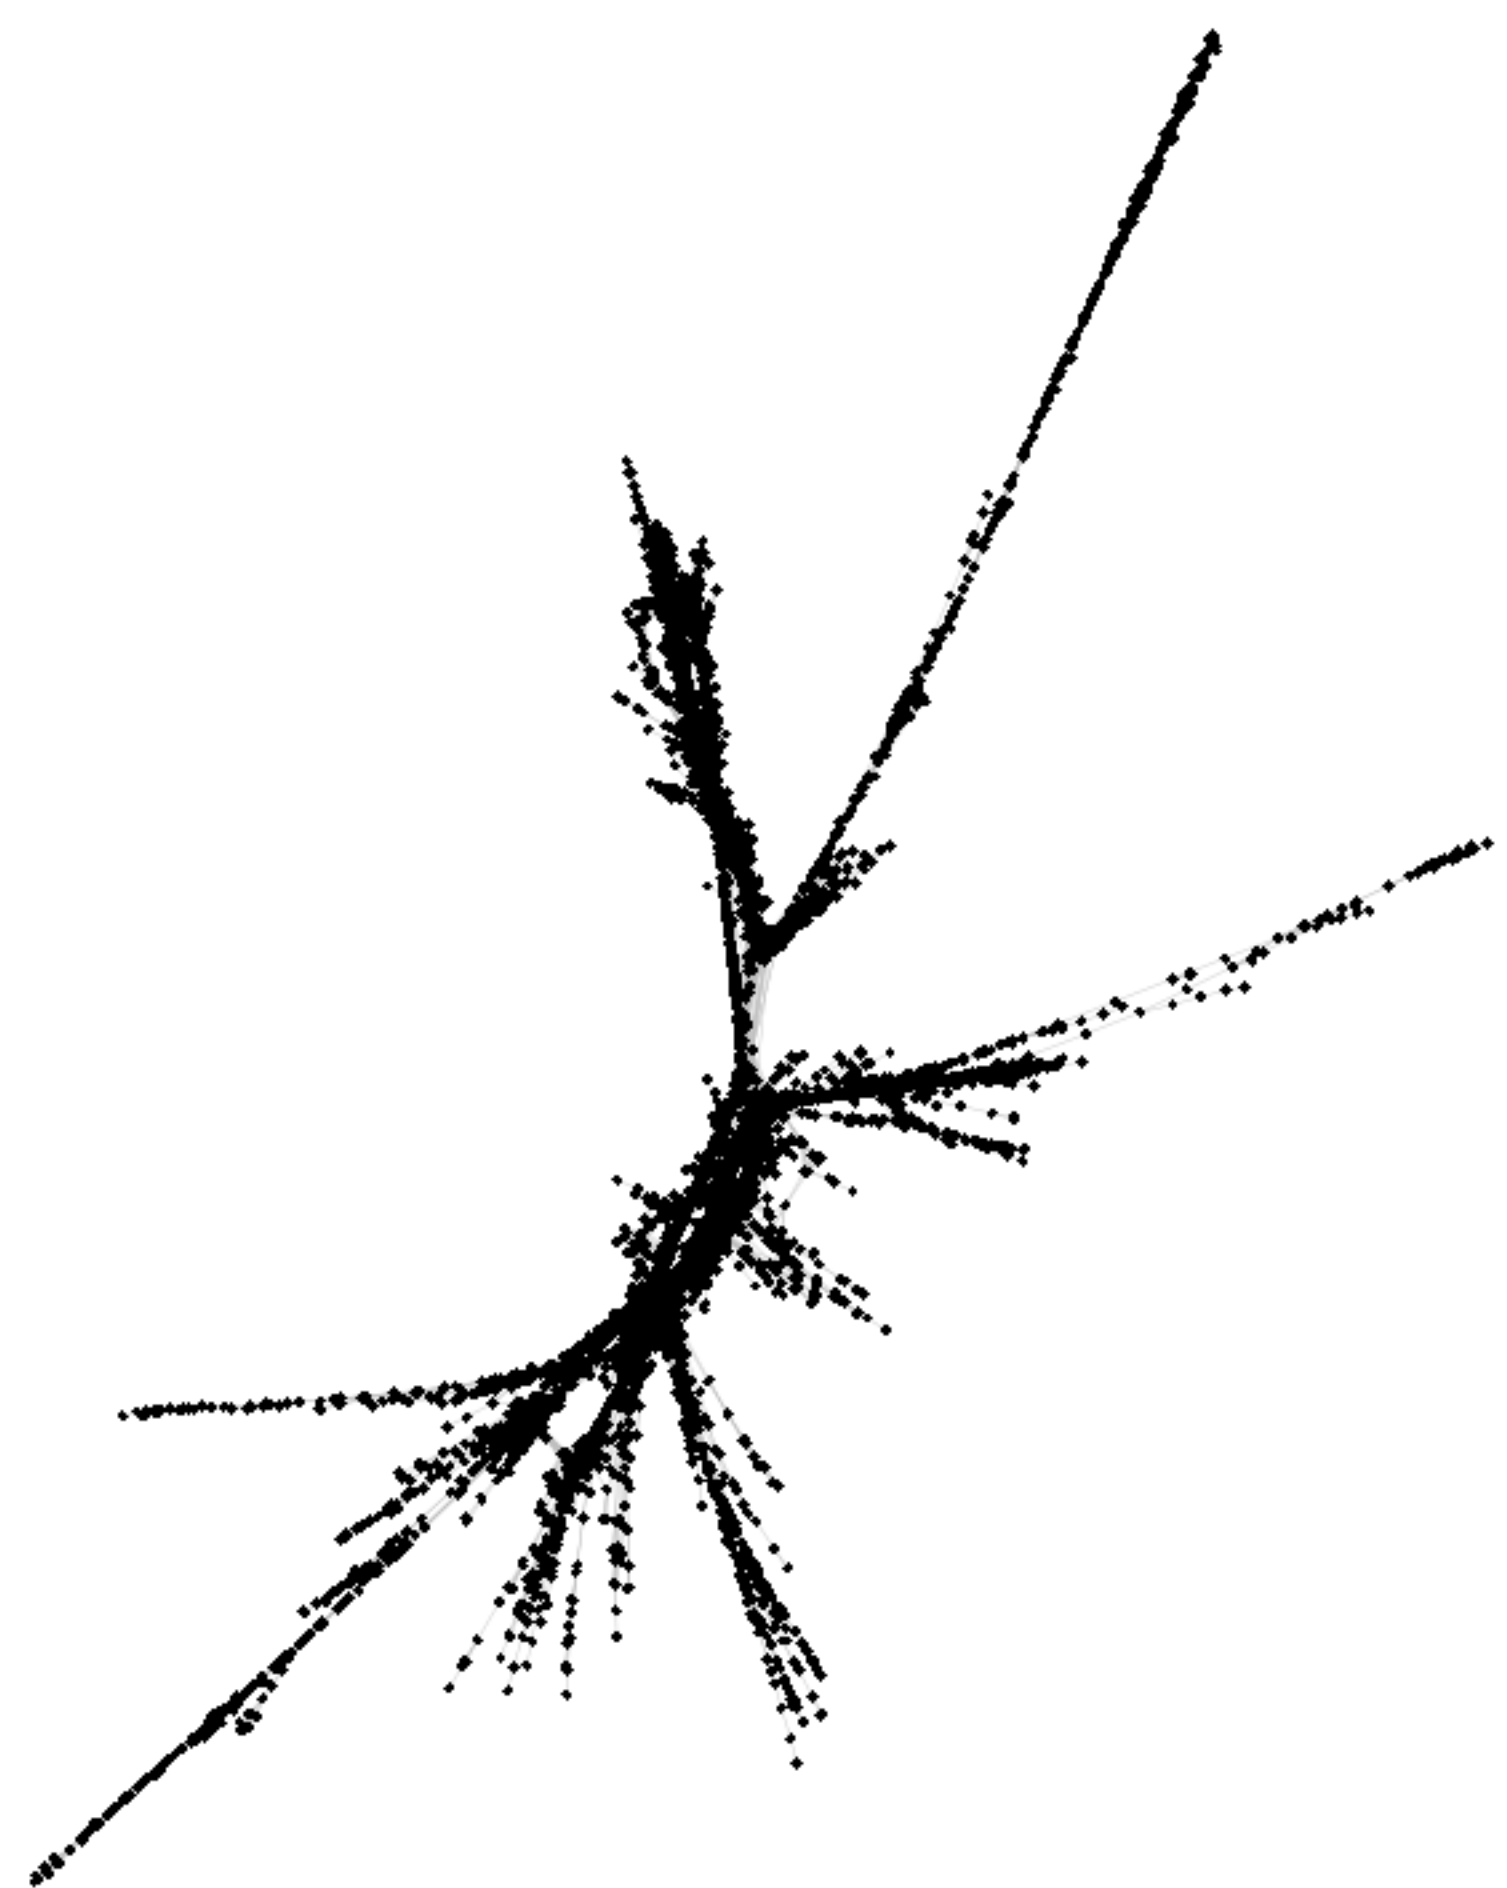

**CL53**

Number of reads: 8823  
Number of pairs: 329086  
Density: 0.008456  
Diameter: NA  
Mean edge weigth: 155.97  
Max. degree: 457

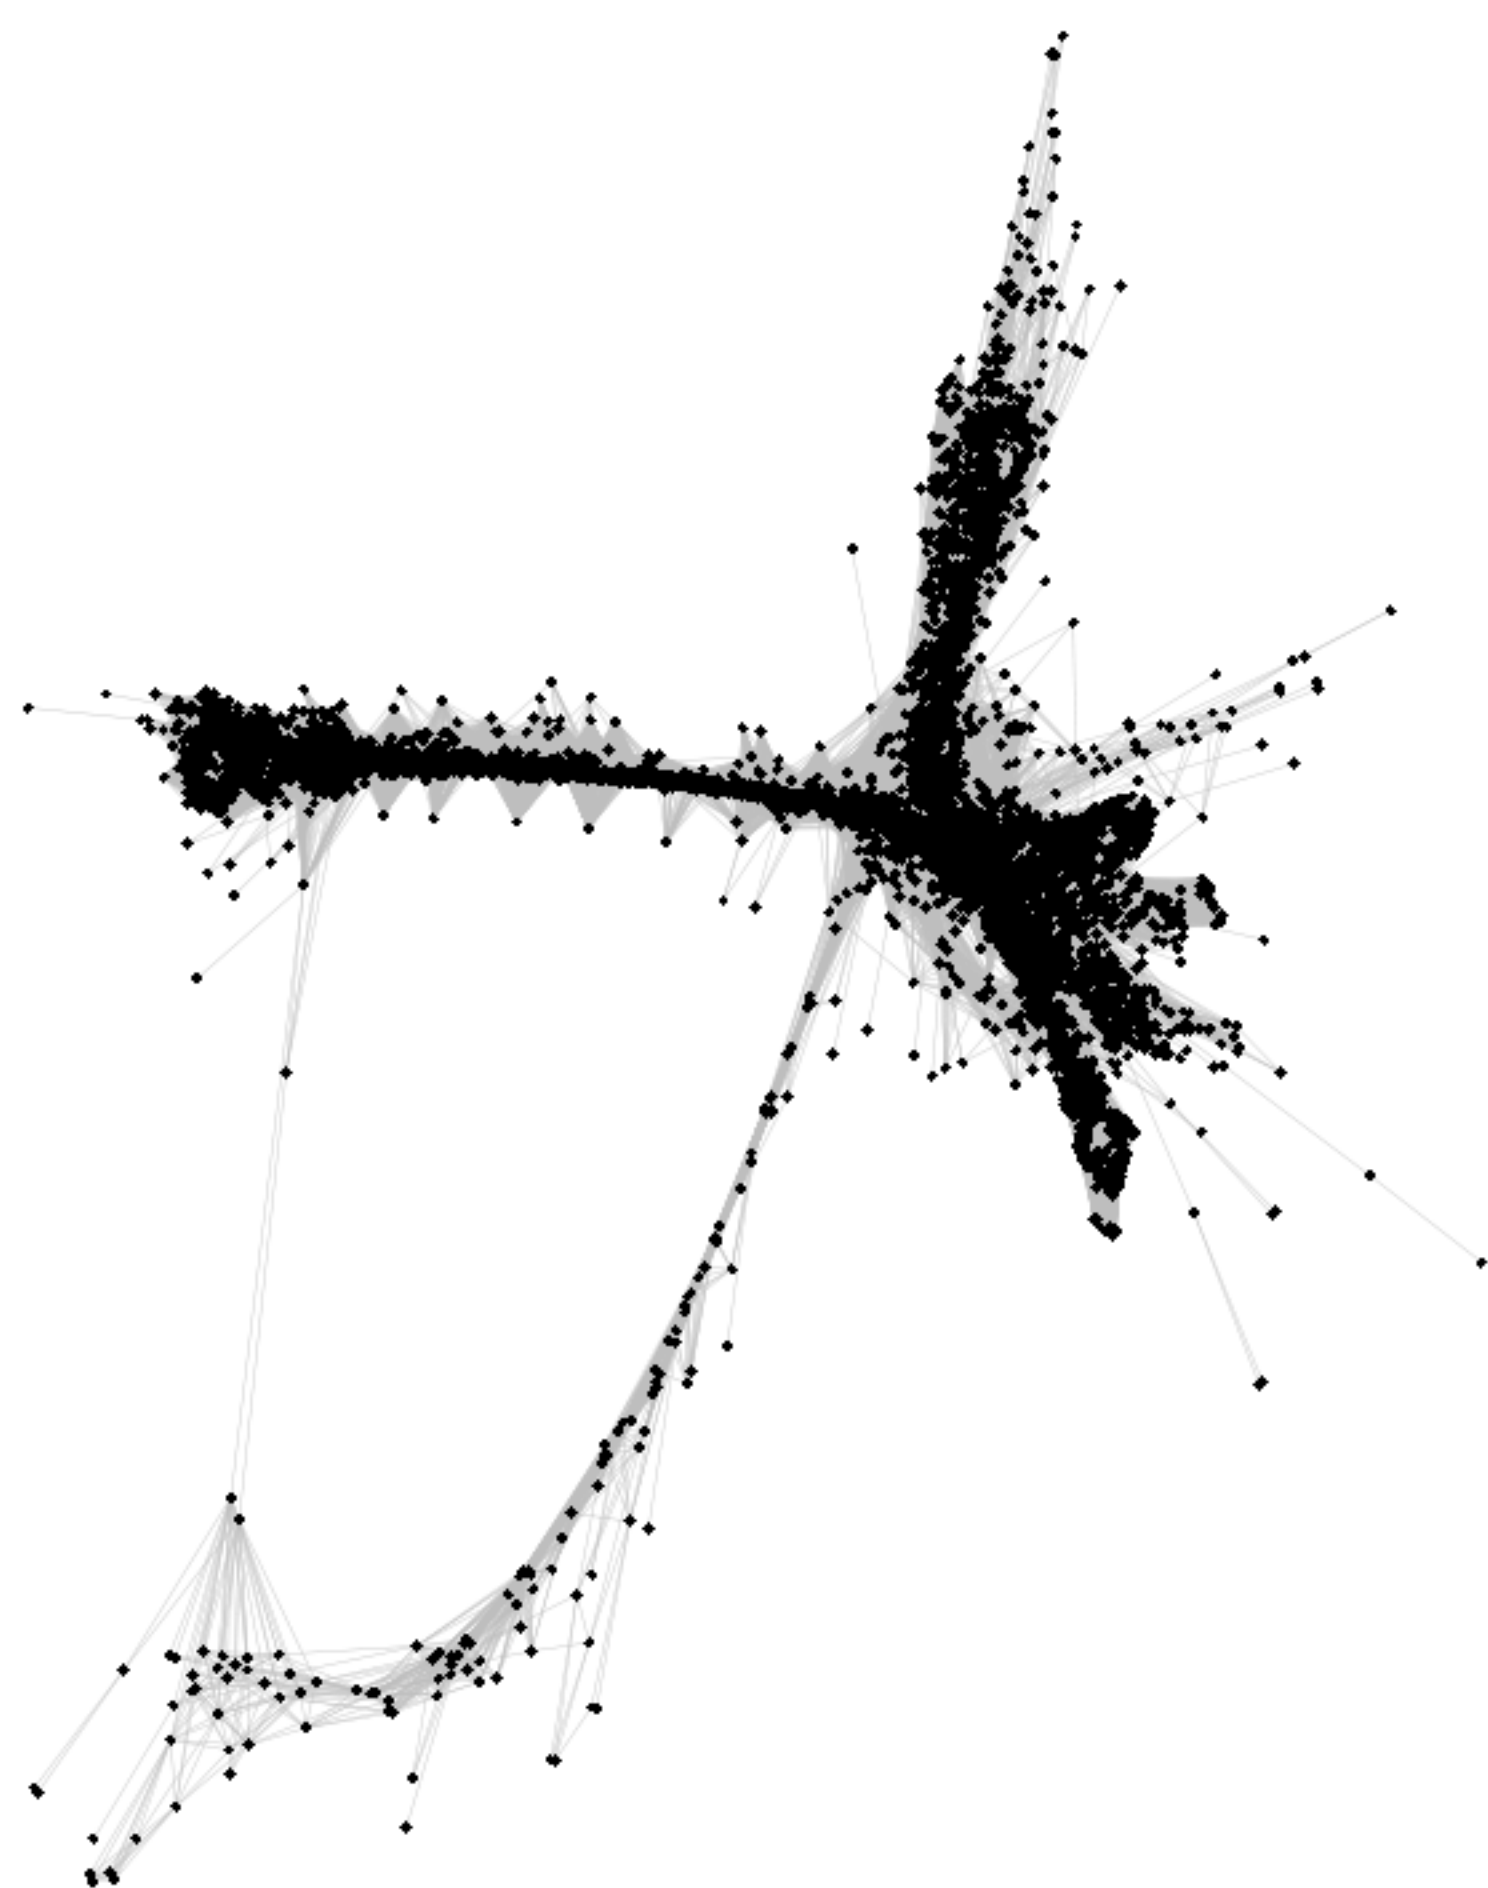

**CL54**

Number of reads: 8629  
Number of pairs: 2354309  
Density: 0.06324  
Diameter: NA  
Mean edge weigth: 164.89  
Max. degree: 1382

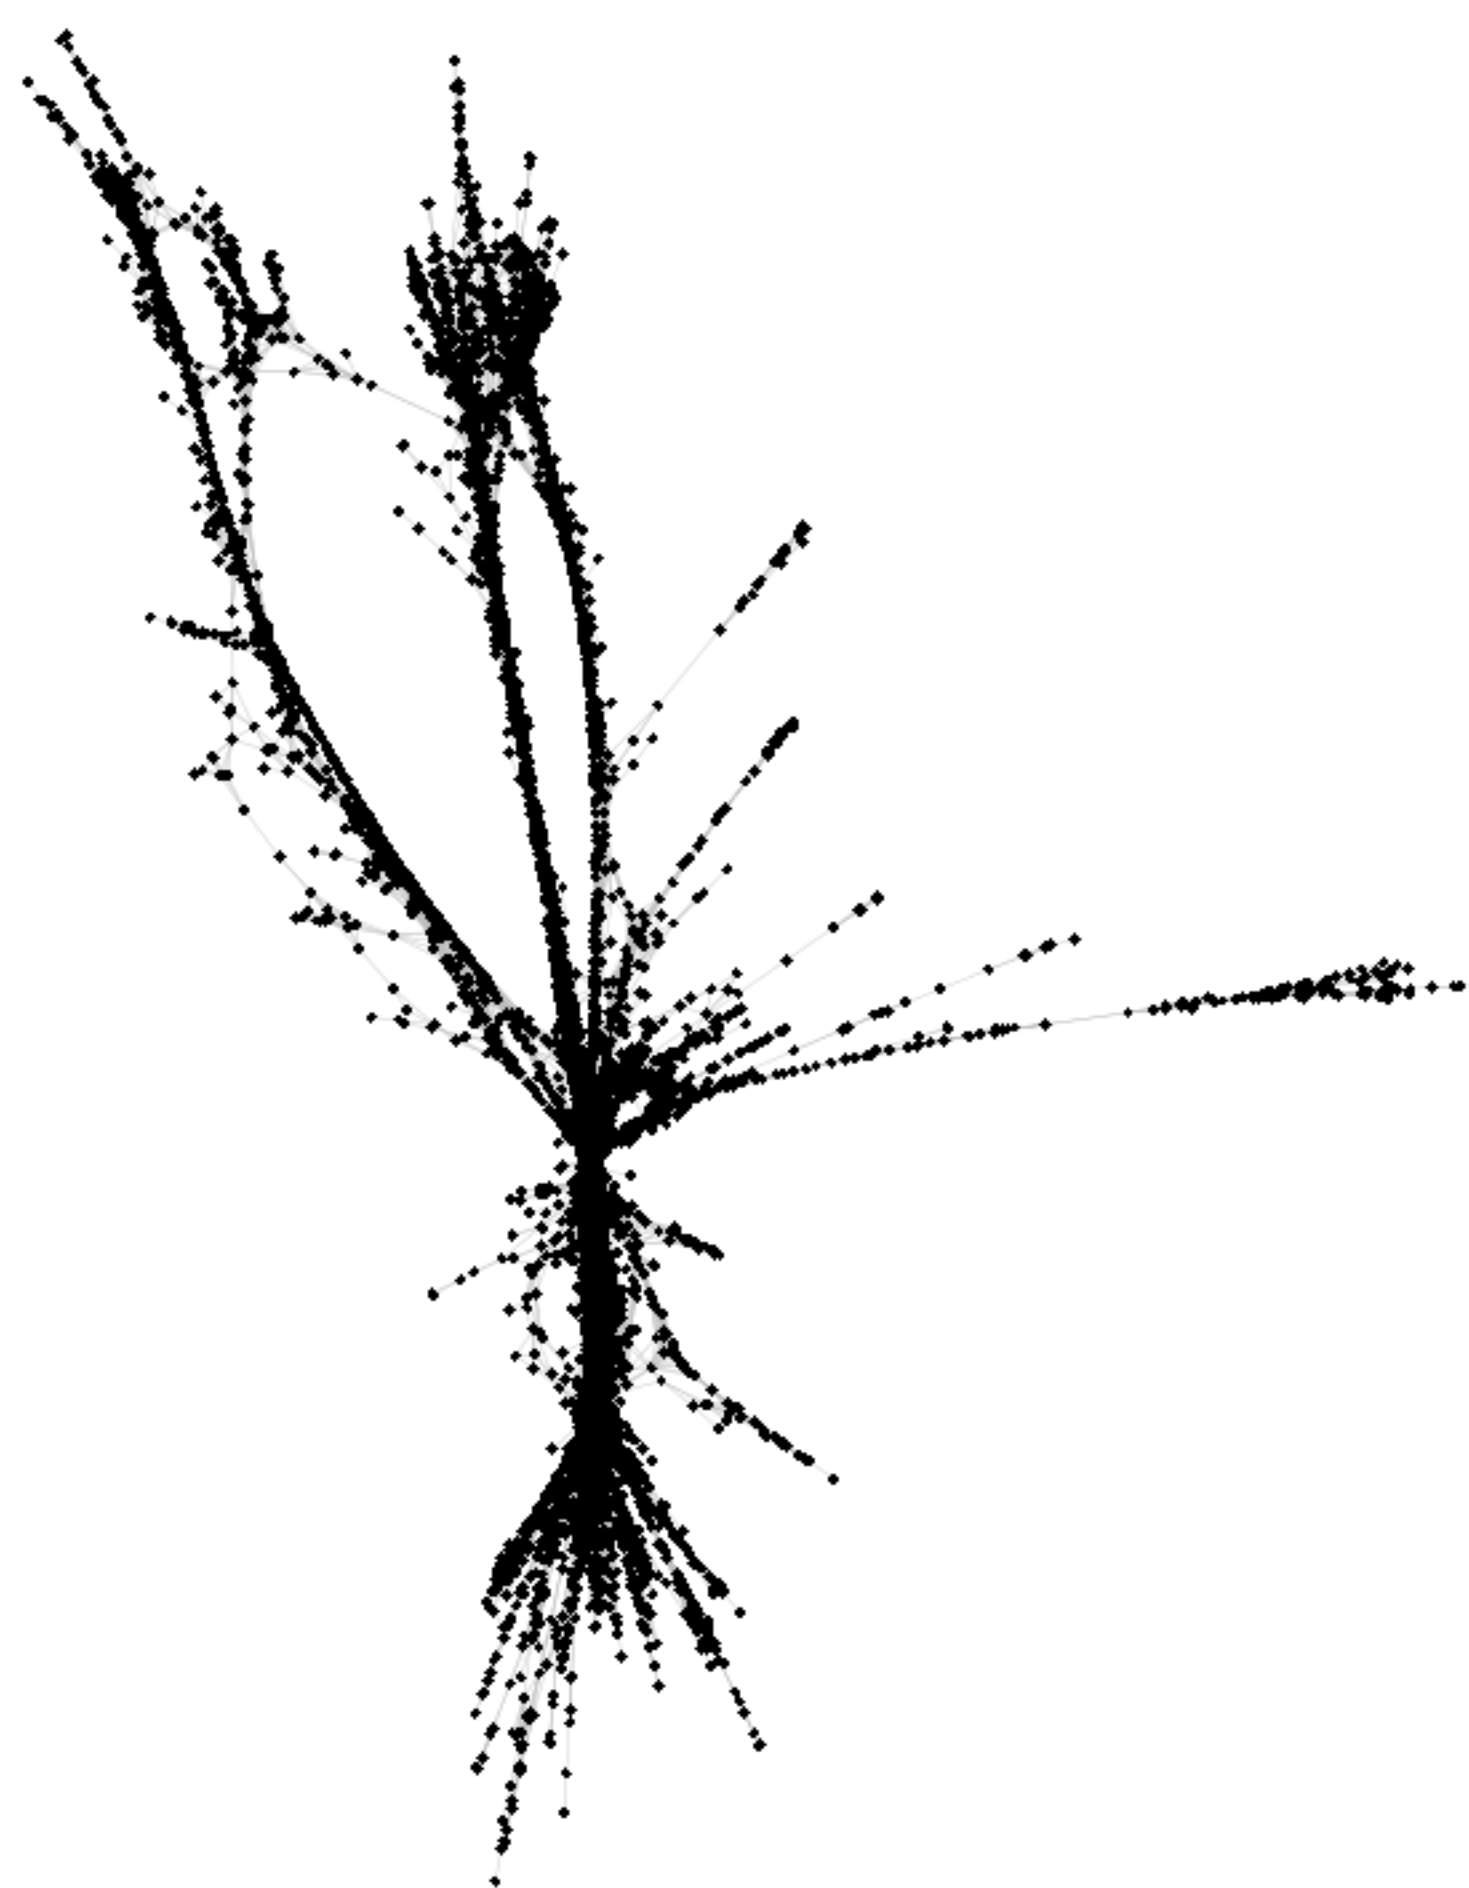

**CL55**

Number of reads: 8535  
Number of pairs: 370717  
Density: 0.01018  
Diameter: NA  
Mean edge weigth: 157.39  
Max. degree: 678

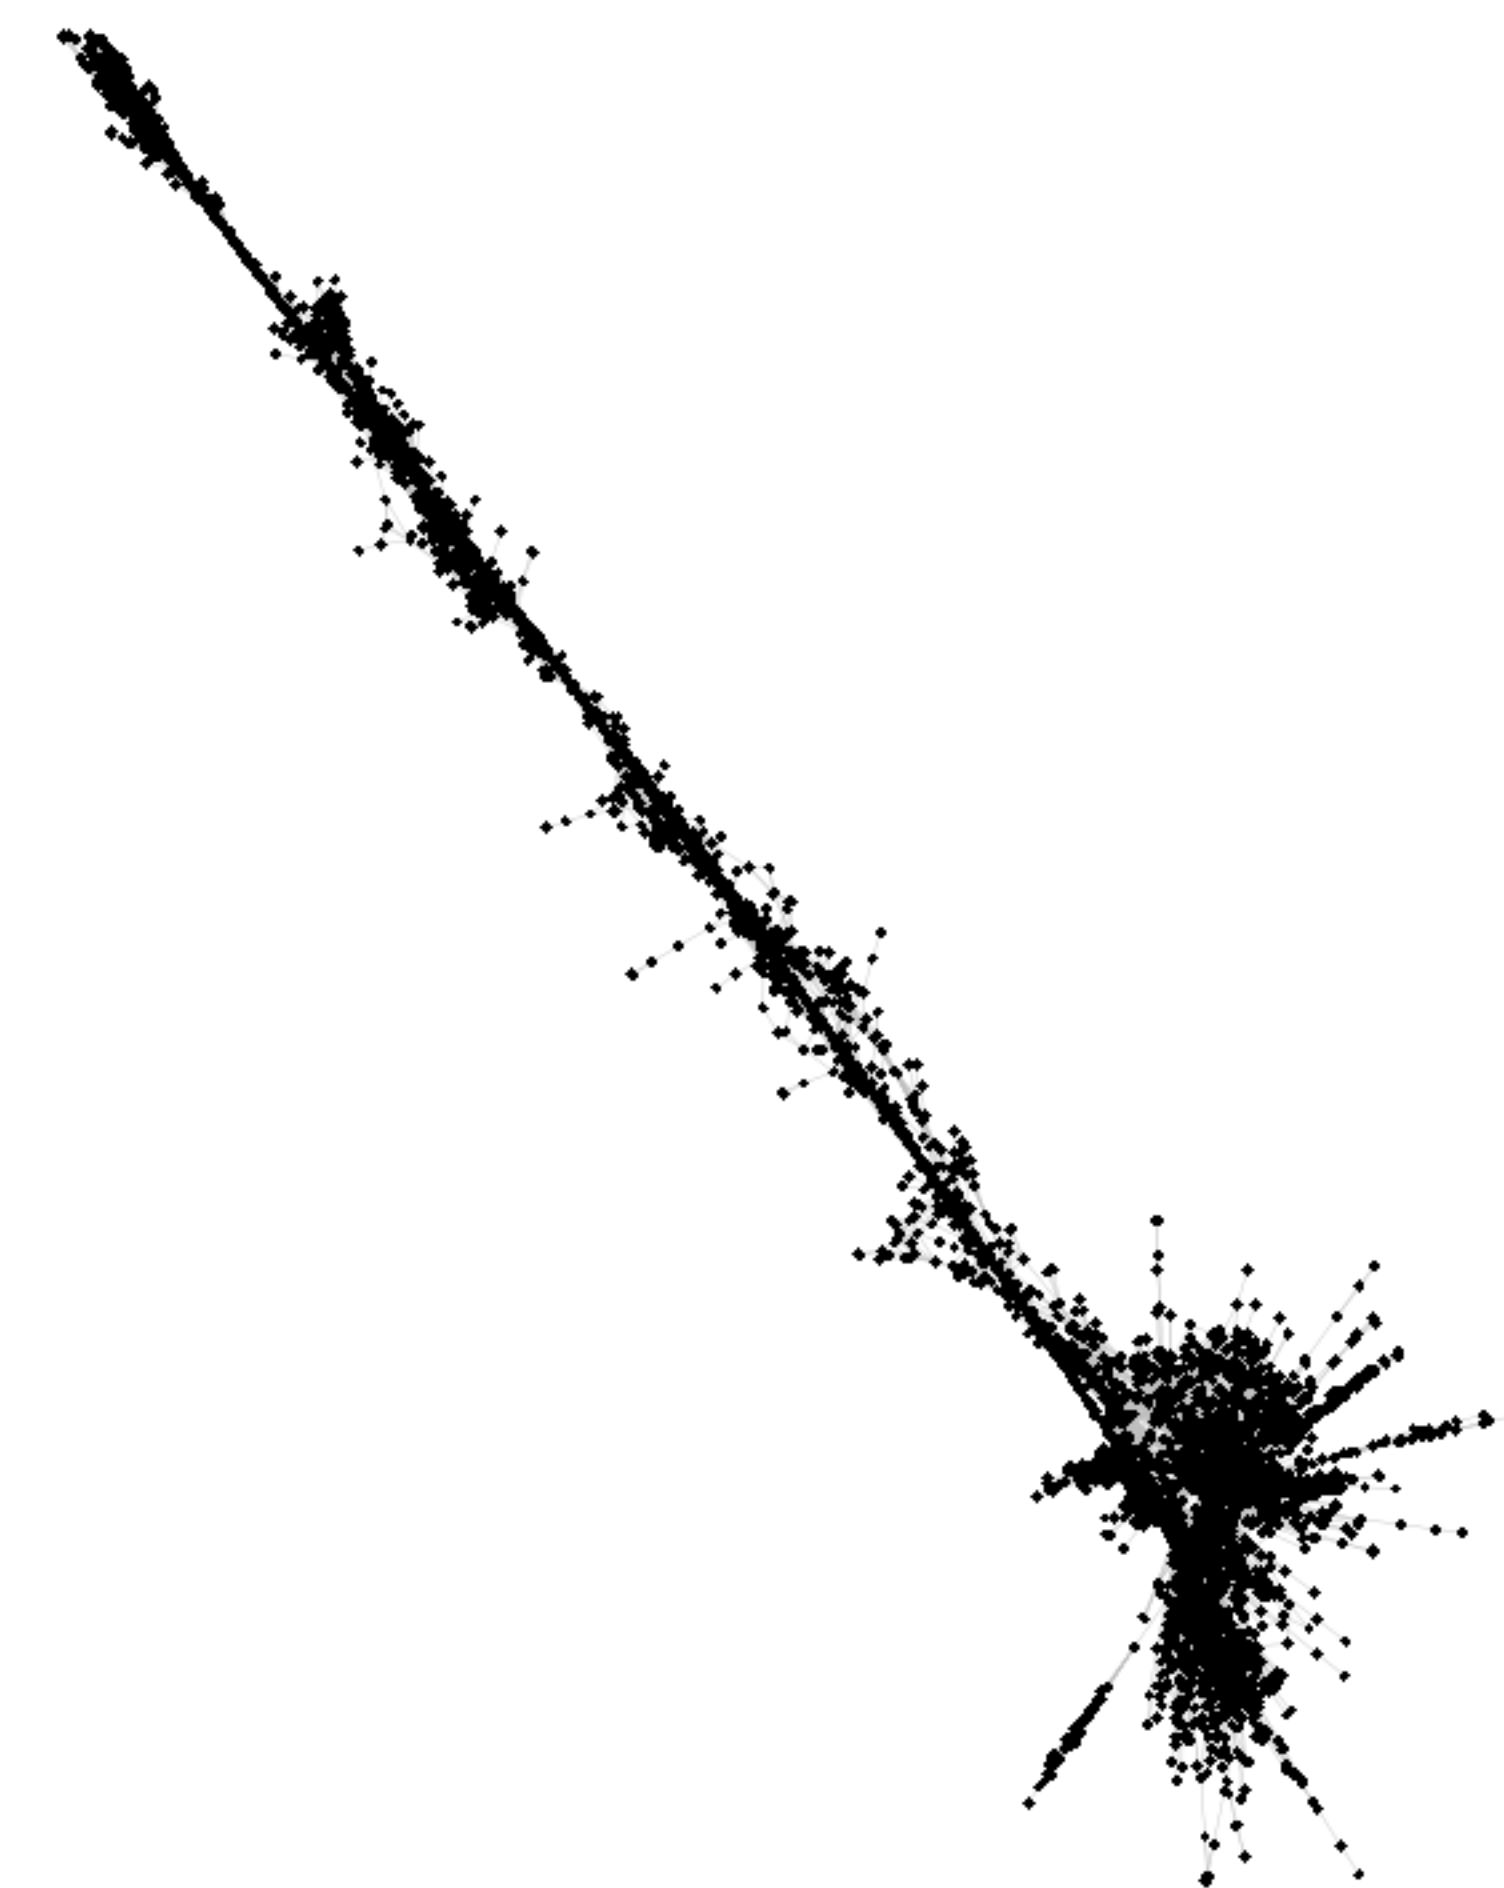

**CL56**

Number of reads: 8386  
Number of pairs: 466121  
Density: 0.01326  
Diameter: NA  
Mean edge weigth: 160.62  
Max. degree: 649

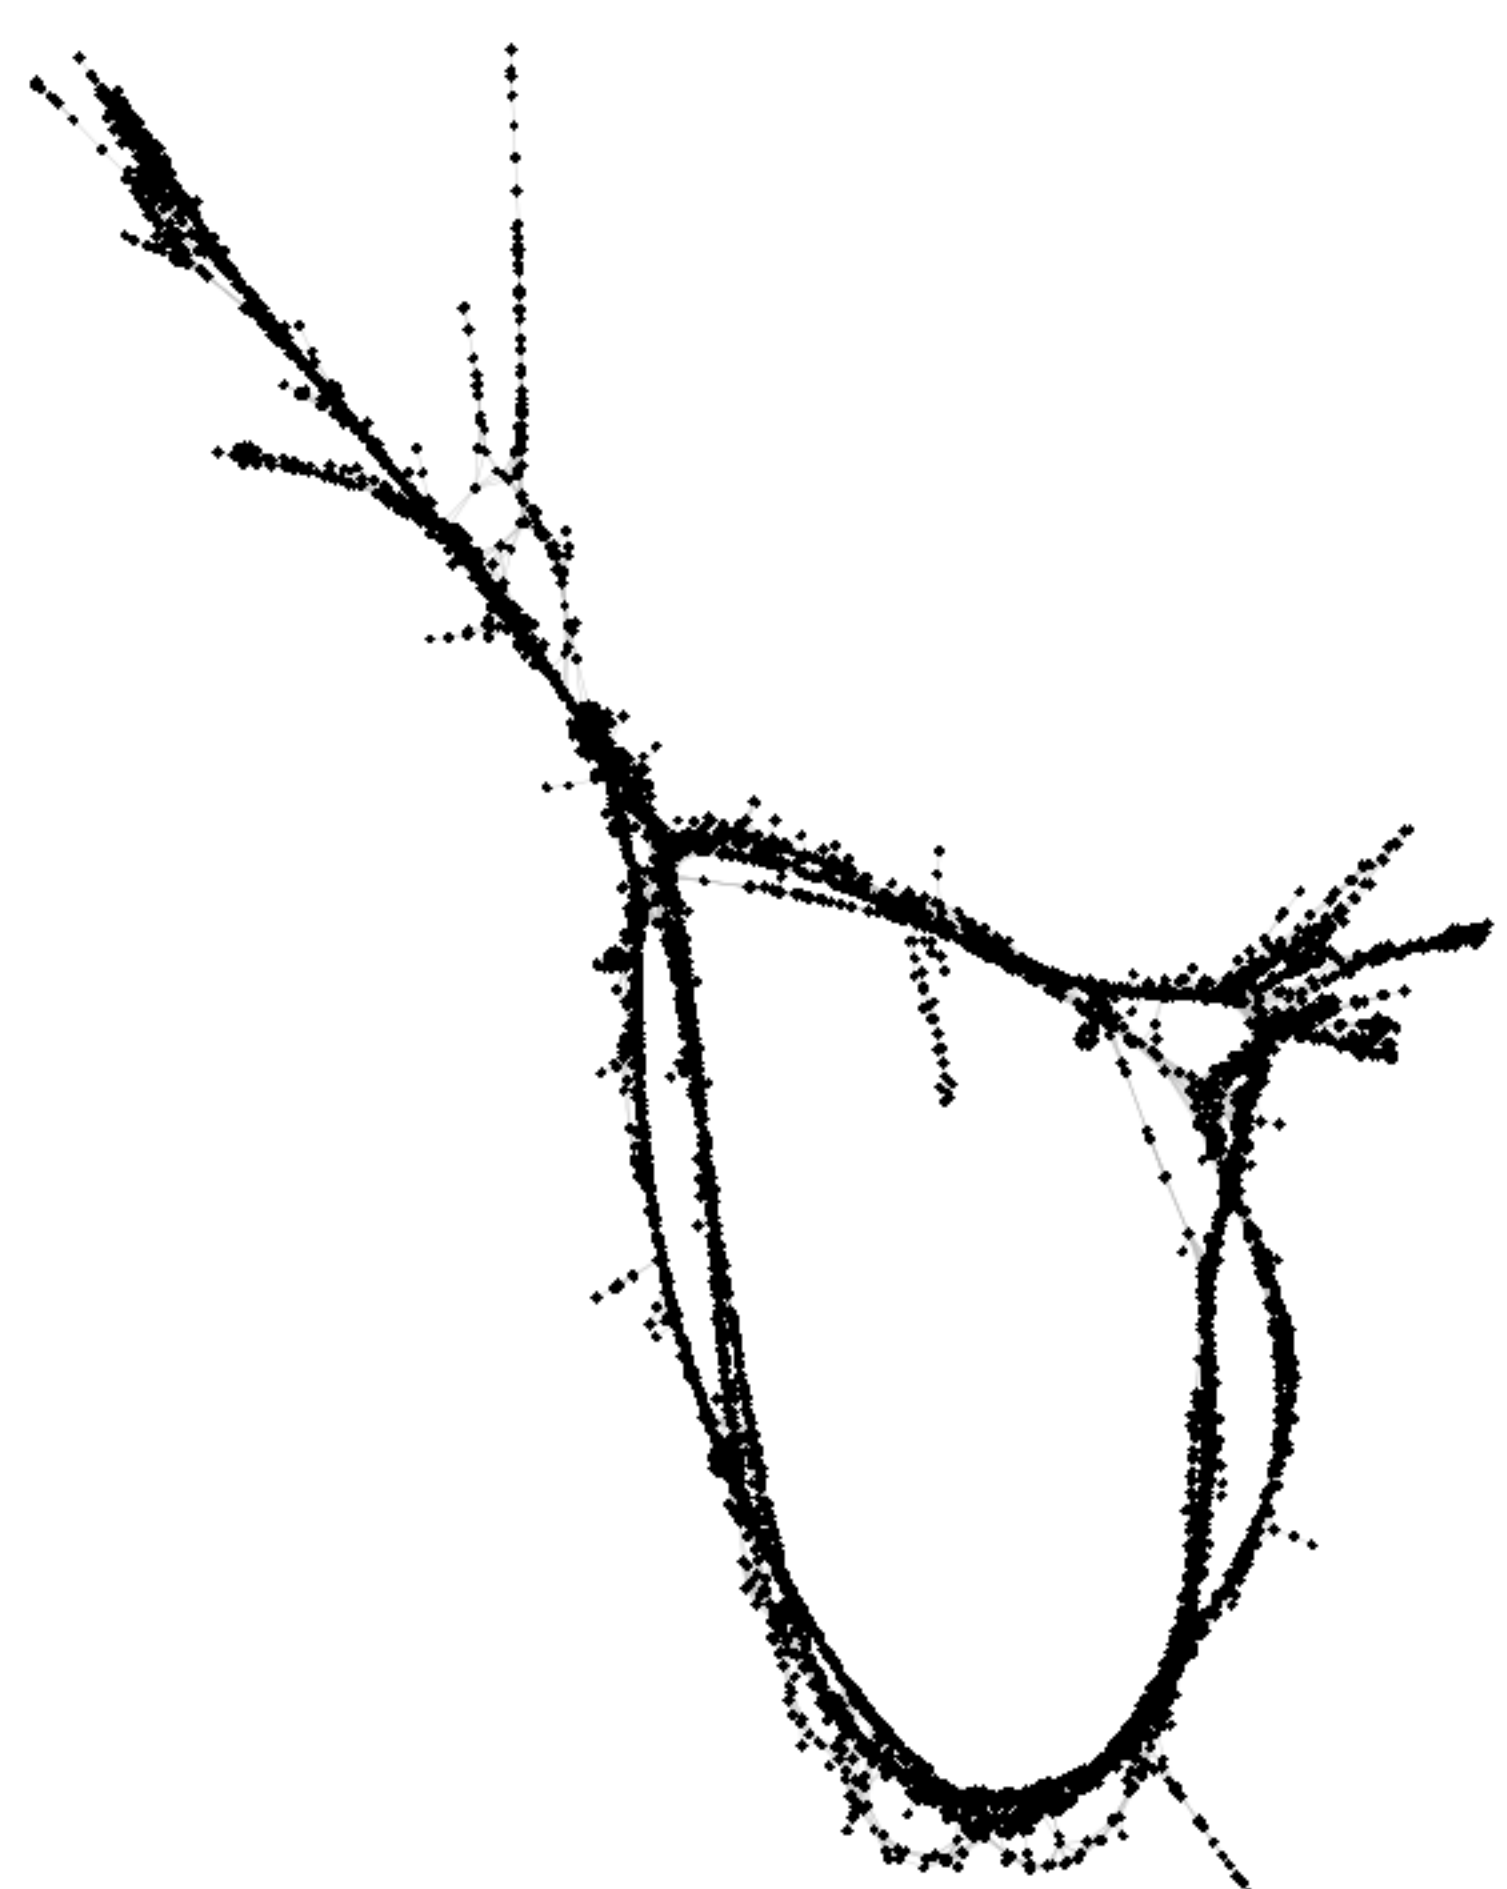

**CL57**

Number of reads: 8225  
Number of pairs: 193301  
Density: 0.005715  
Diameter: NA  
Mean edge weigth: 164.43  
Max. degree: 232

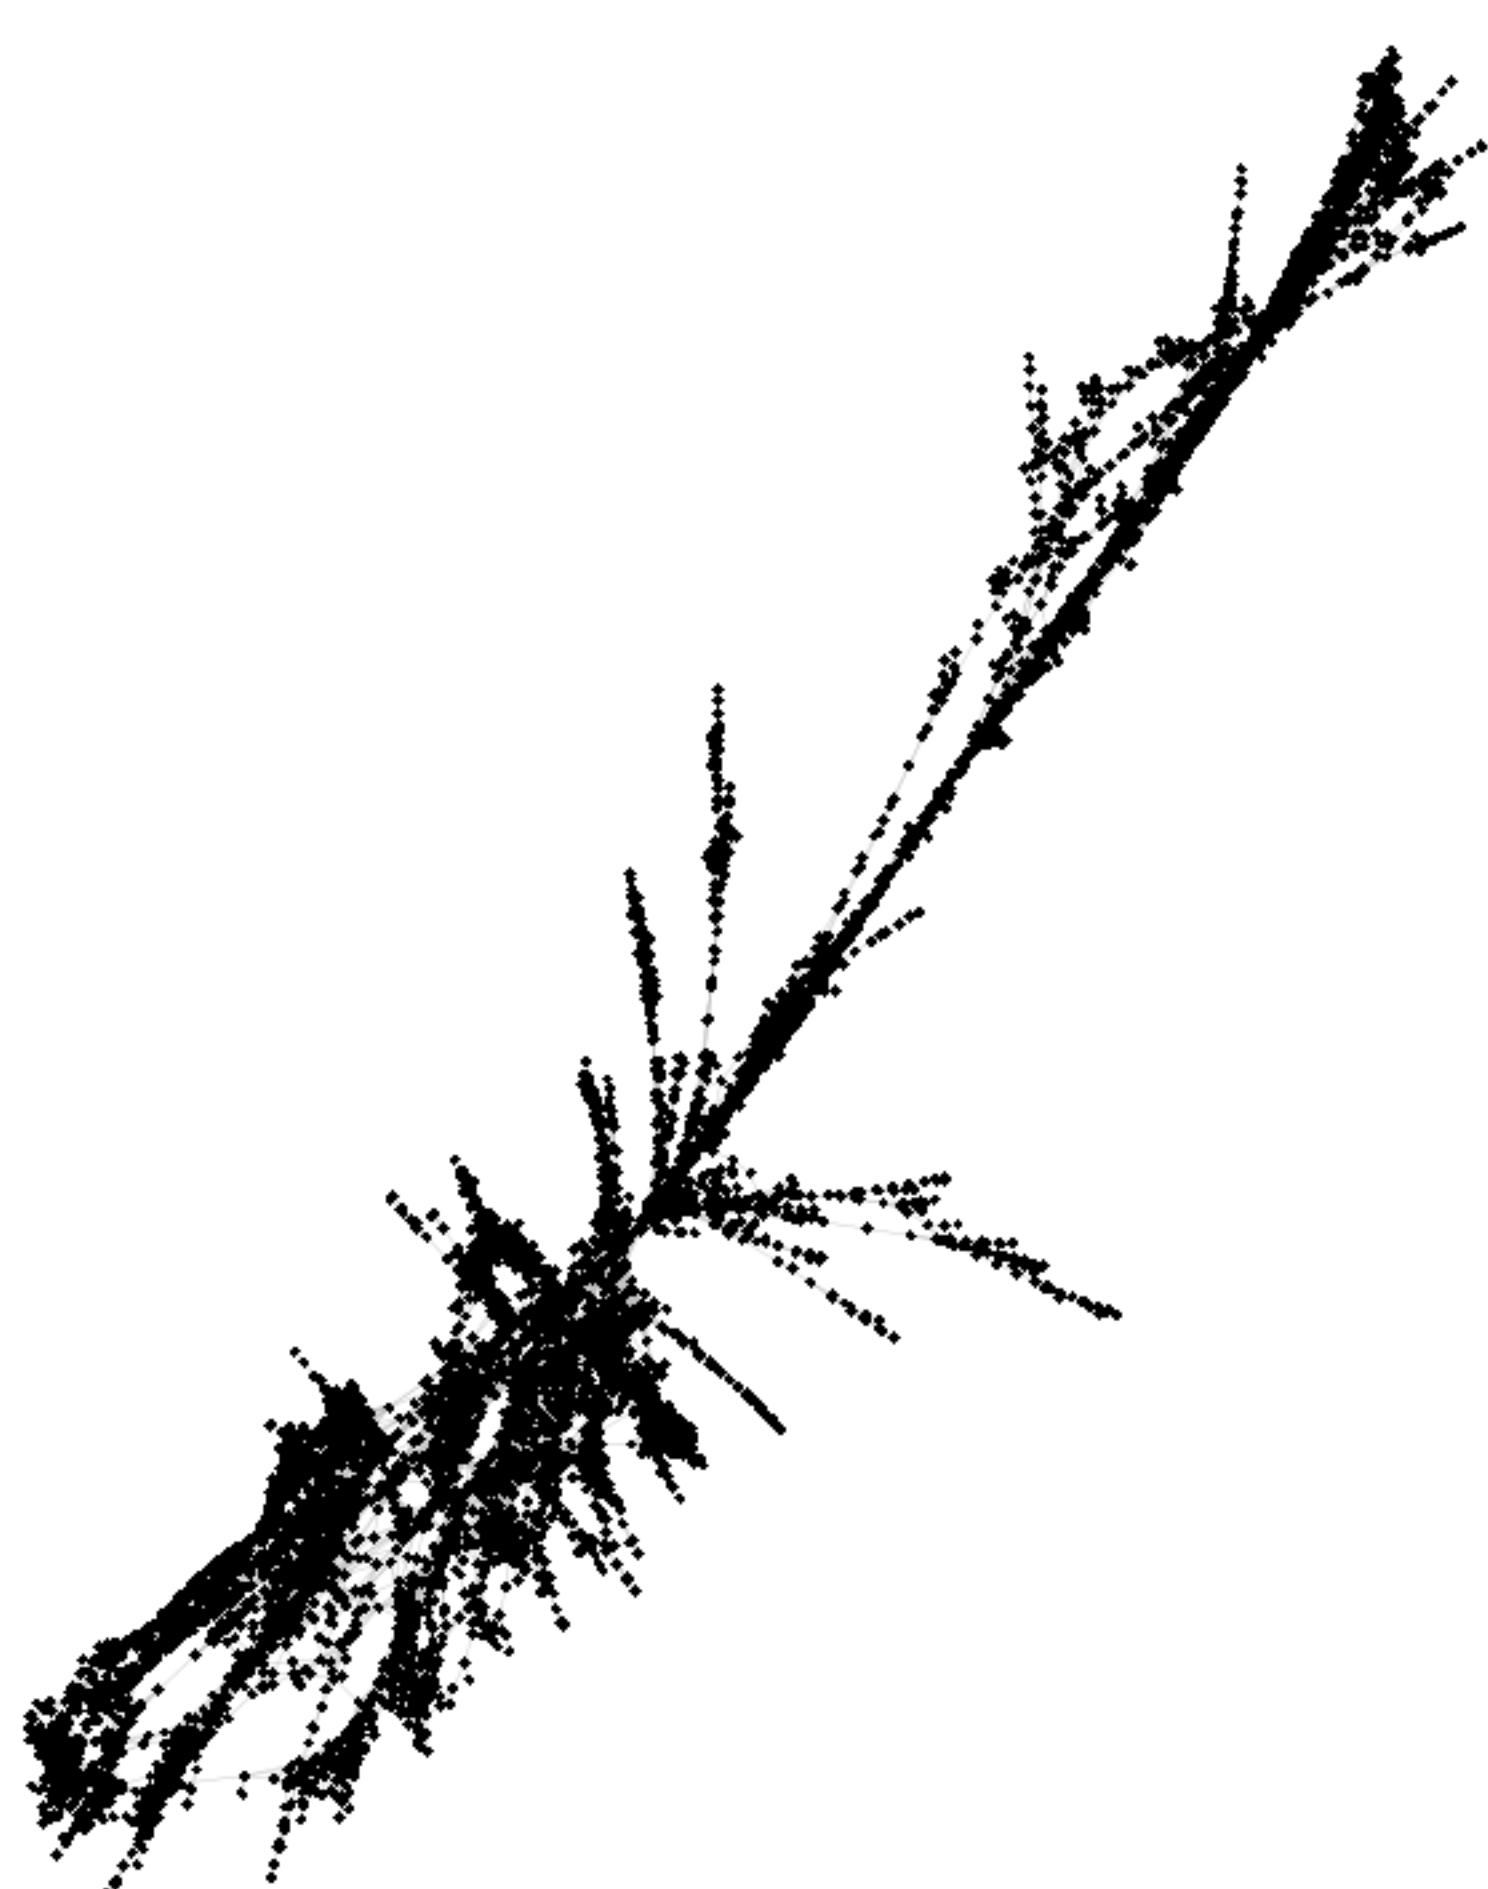

**CL58**

Number of reads: 8129  
Number of pairs: 75817  
Density: 0.002295  
Diameter: NA  
Mean edge weigth: 156.53  
Max. degree: 104

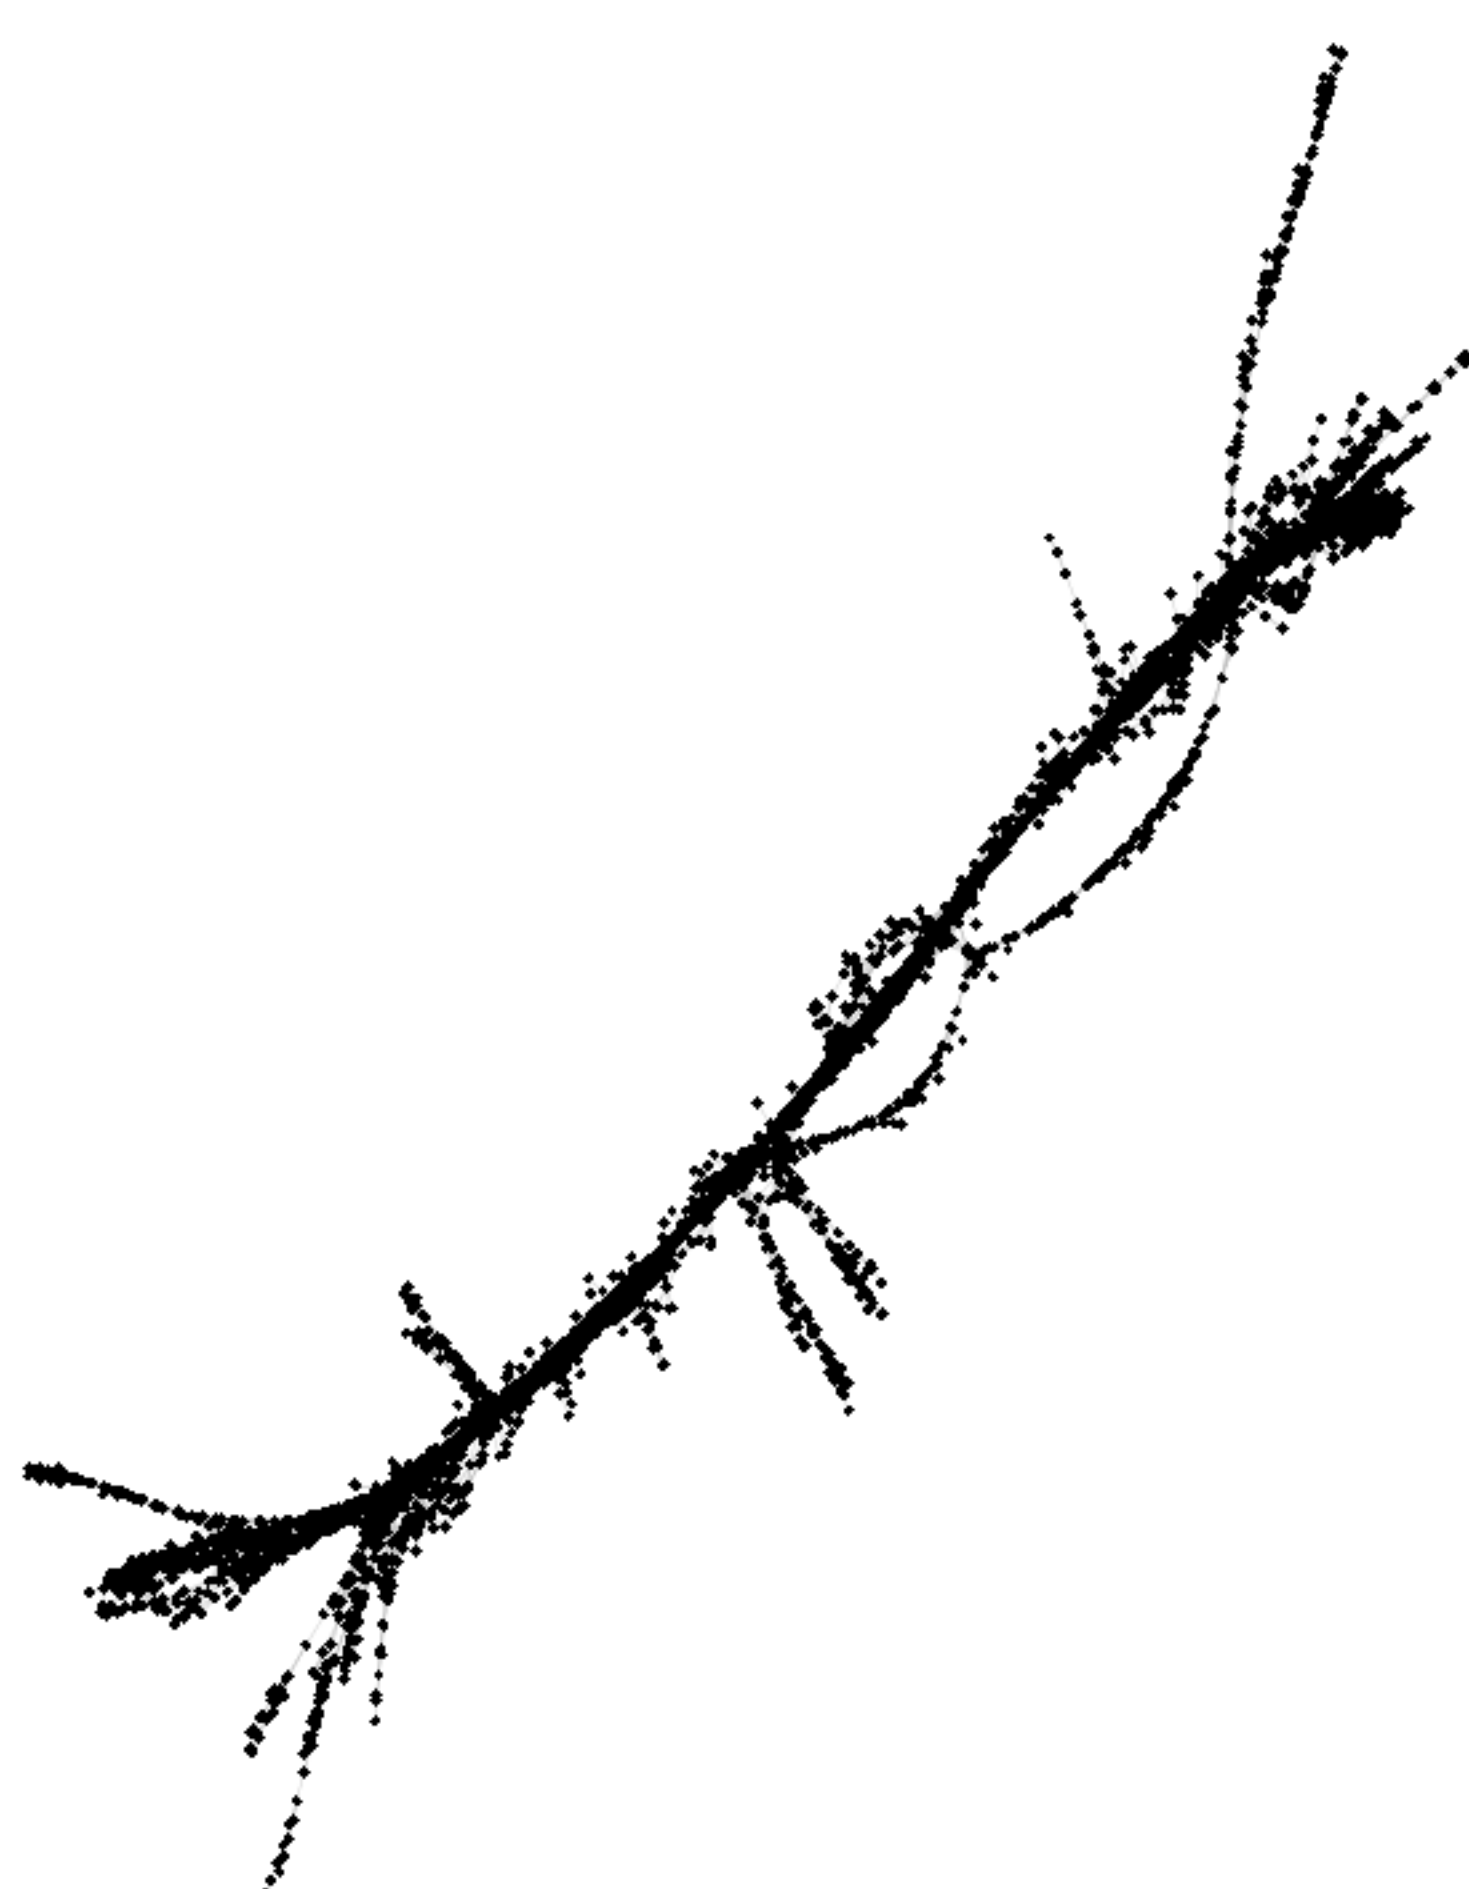

**CL59**

Number of reads: 8049  
Number of pairs: 280544  
Density: 0.008662  
Diameter: NA  
Mean edge weigth: 161.38  
Max. degree: 268

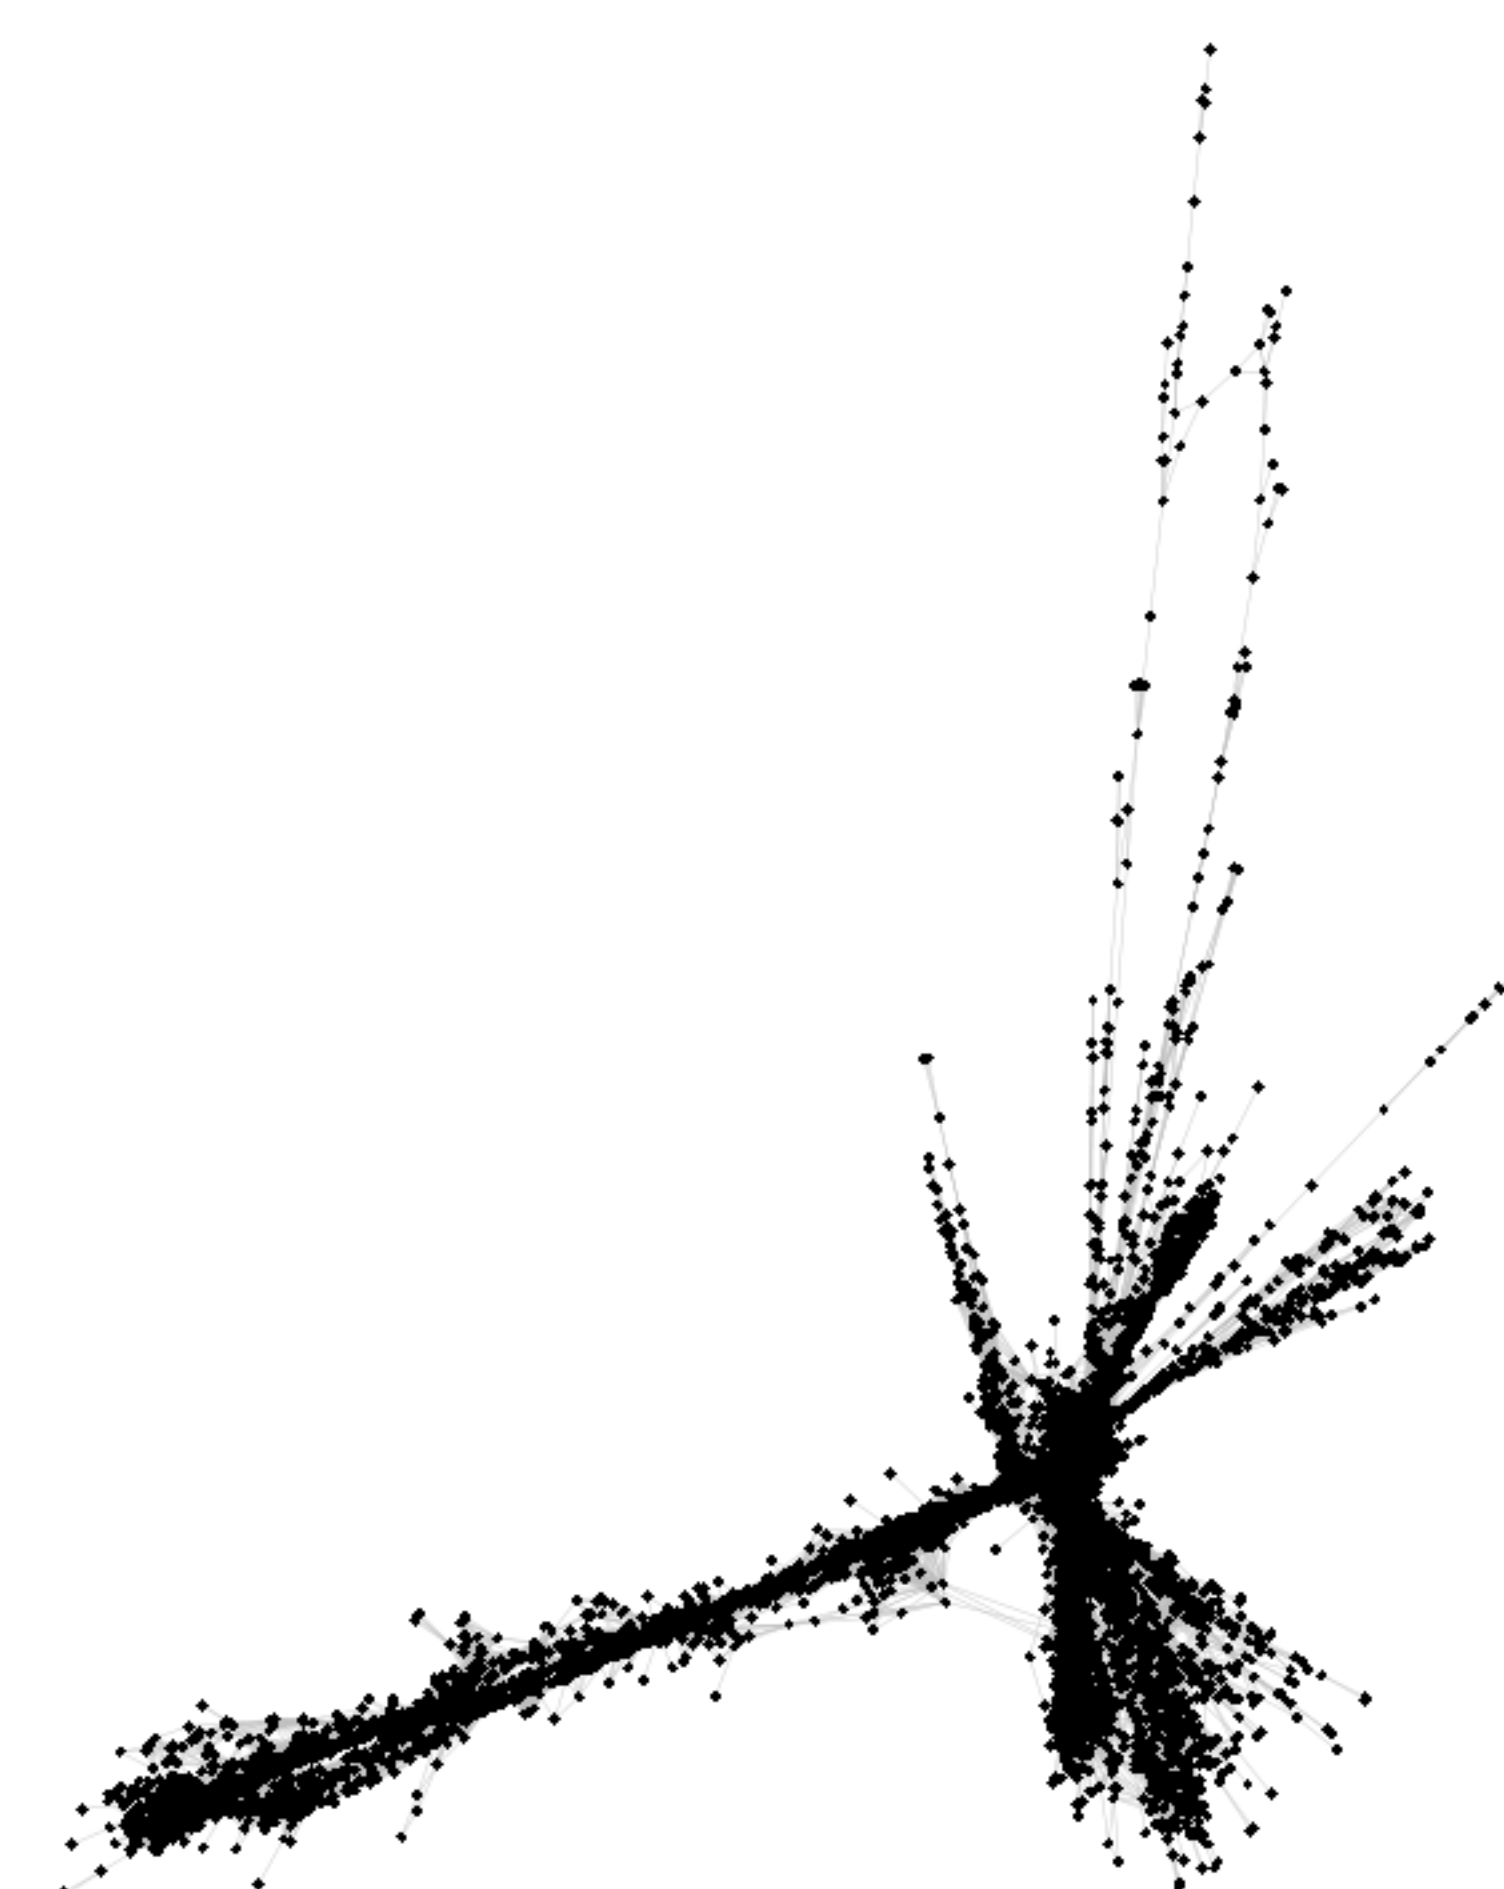

**CL60**

Number of reads: 7948  
Number of pairs: 431868  
Density: 0.01367  
Diameter: NA  
Mean edge weigth: 153.92  
Max. degree: 671

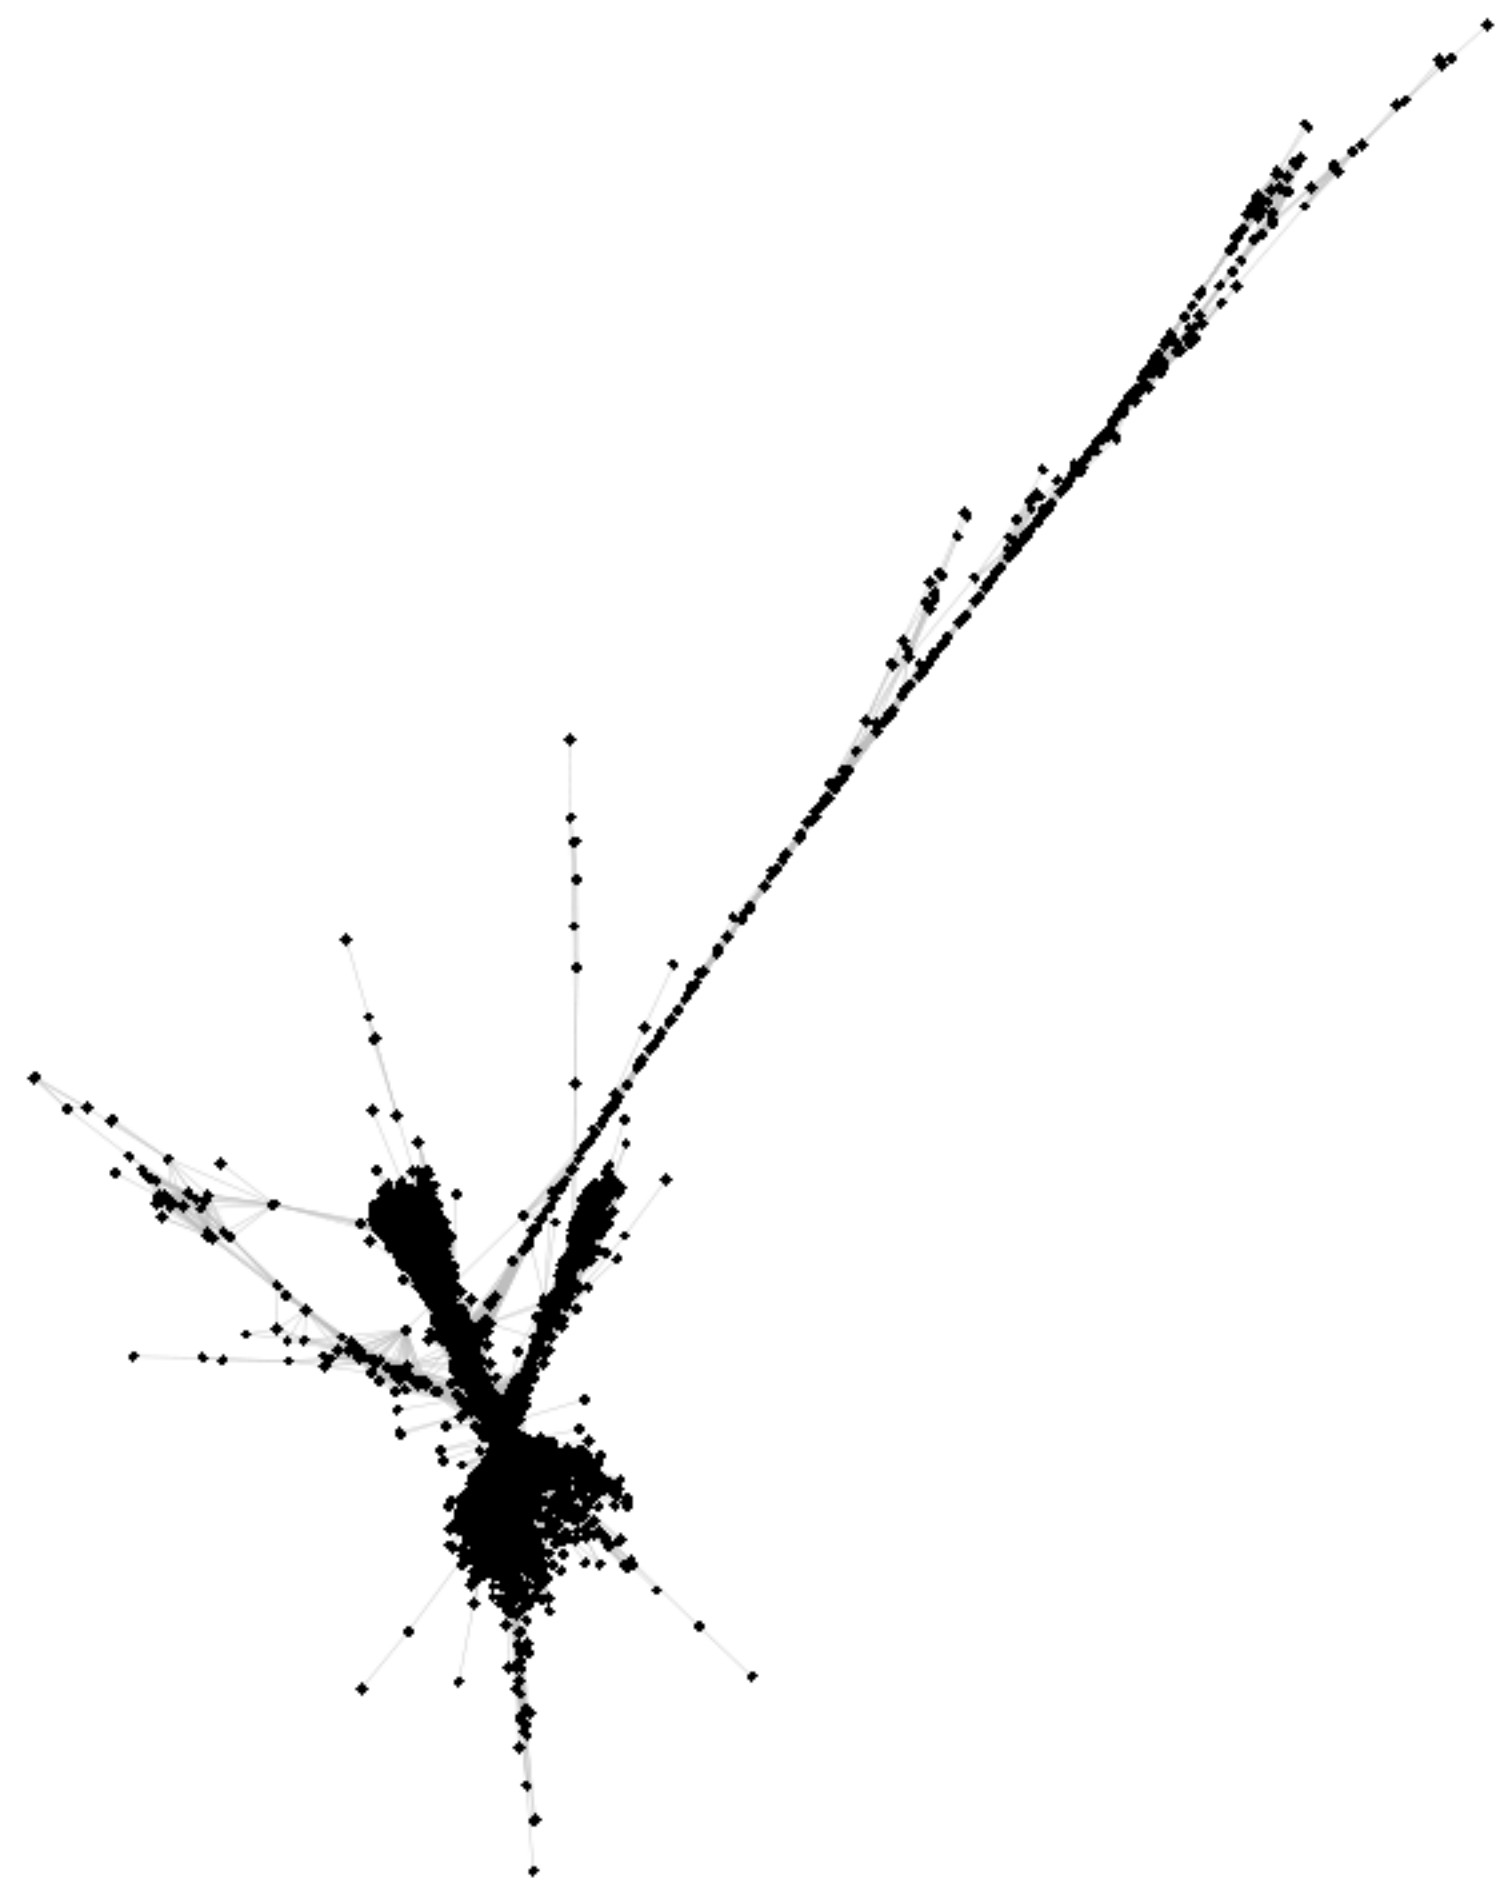

**CL61**

Number of reads: 7897  
Number of pairs: 185577  
Density: 0.05952  
Diameter: NA  
Mean edge weight: 153.7  
Max. degree: 2014

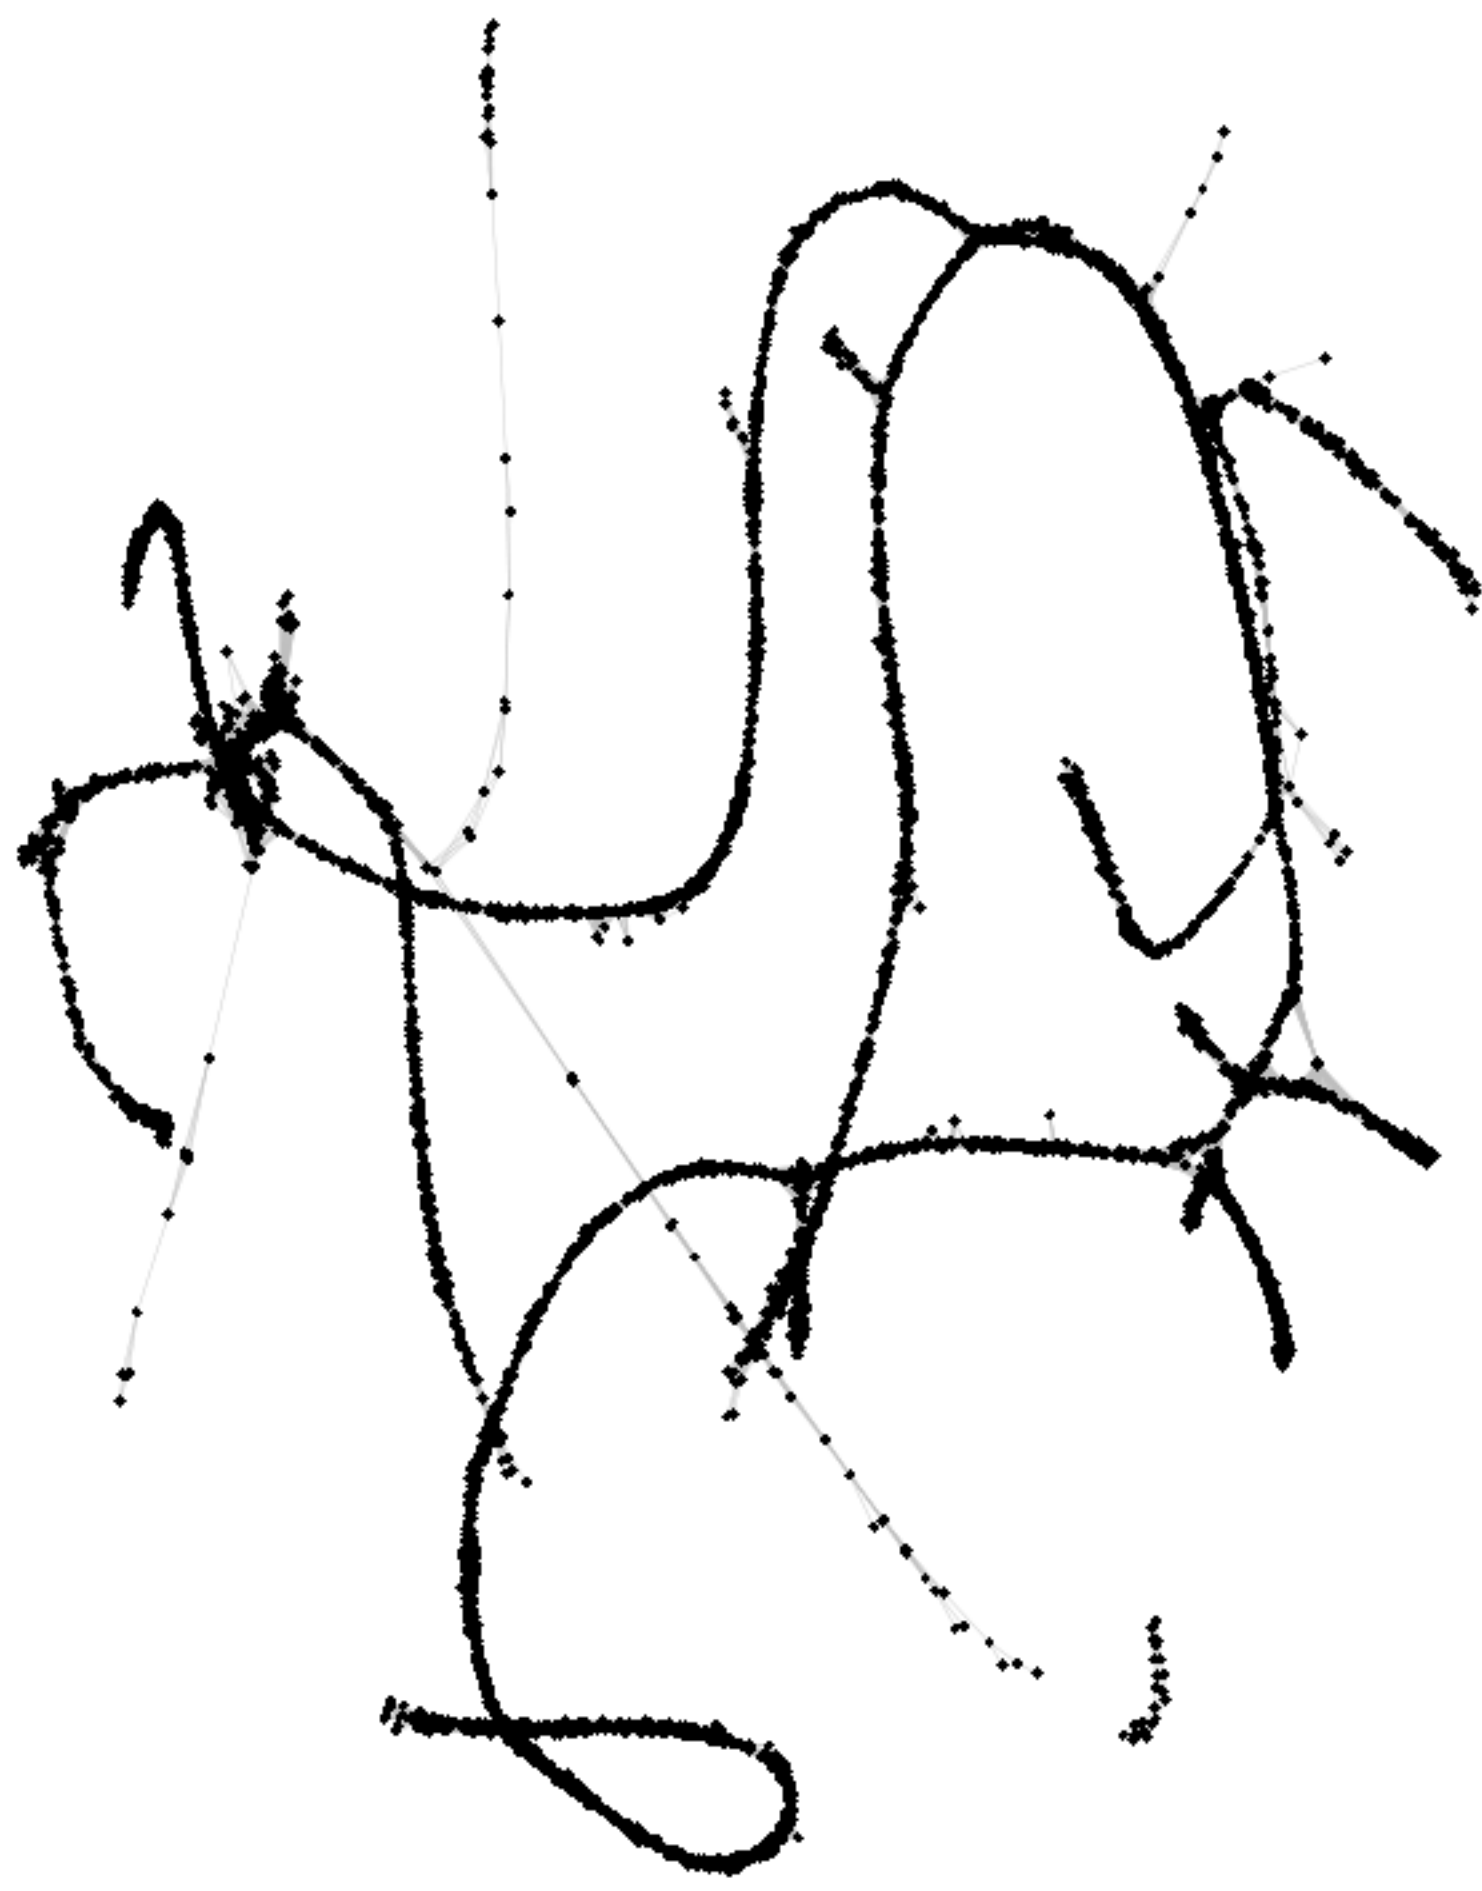

**CL62**

Number of reads: 7512  
Number of pairs: 232587  
Density: 0.008244  
Diameter: NA  
Mean edge weight: 210.28  
Max. degree: 230

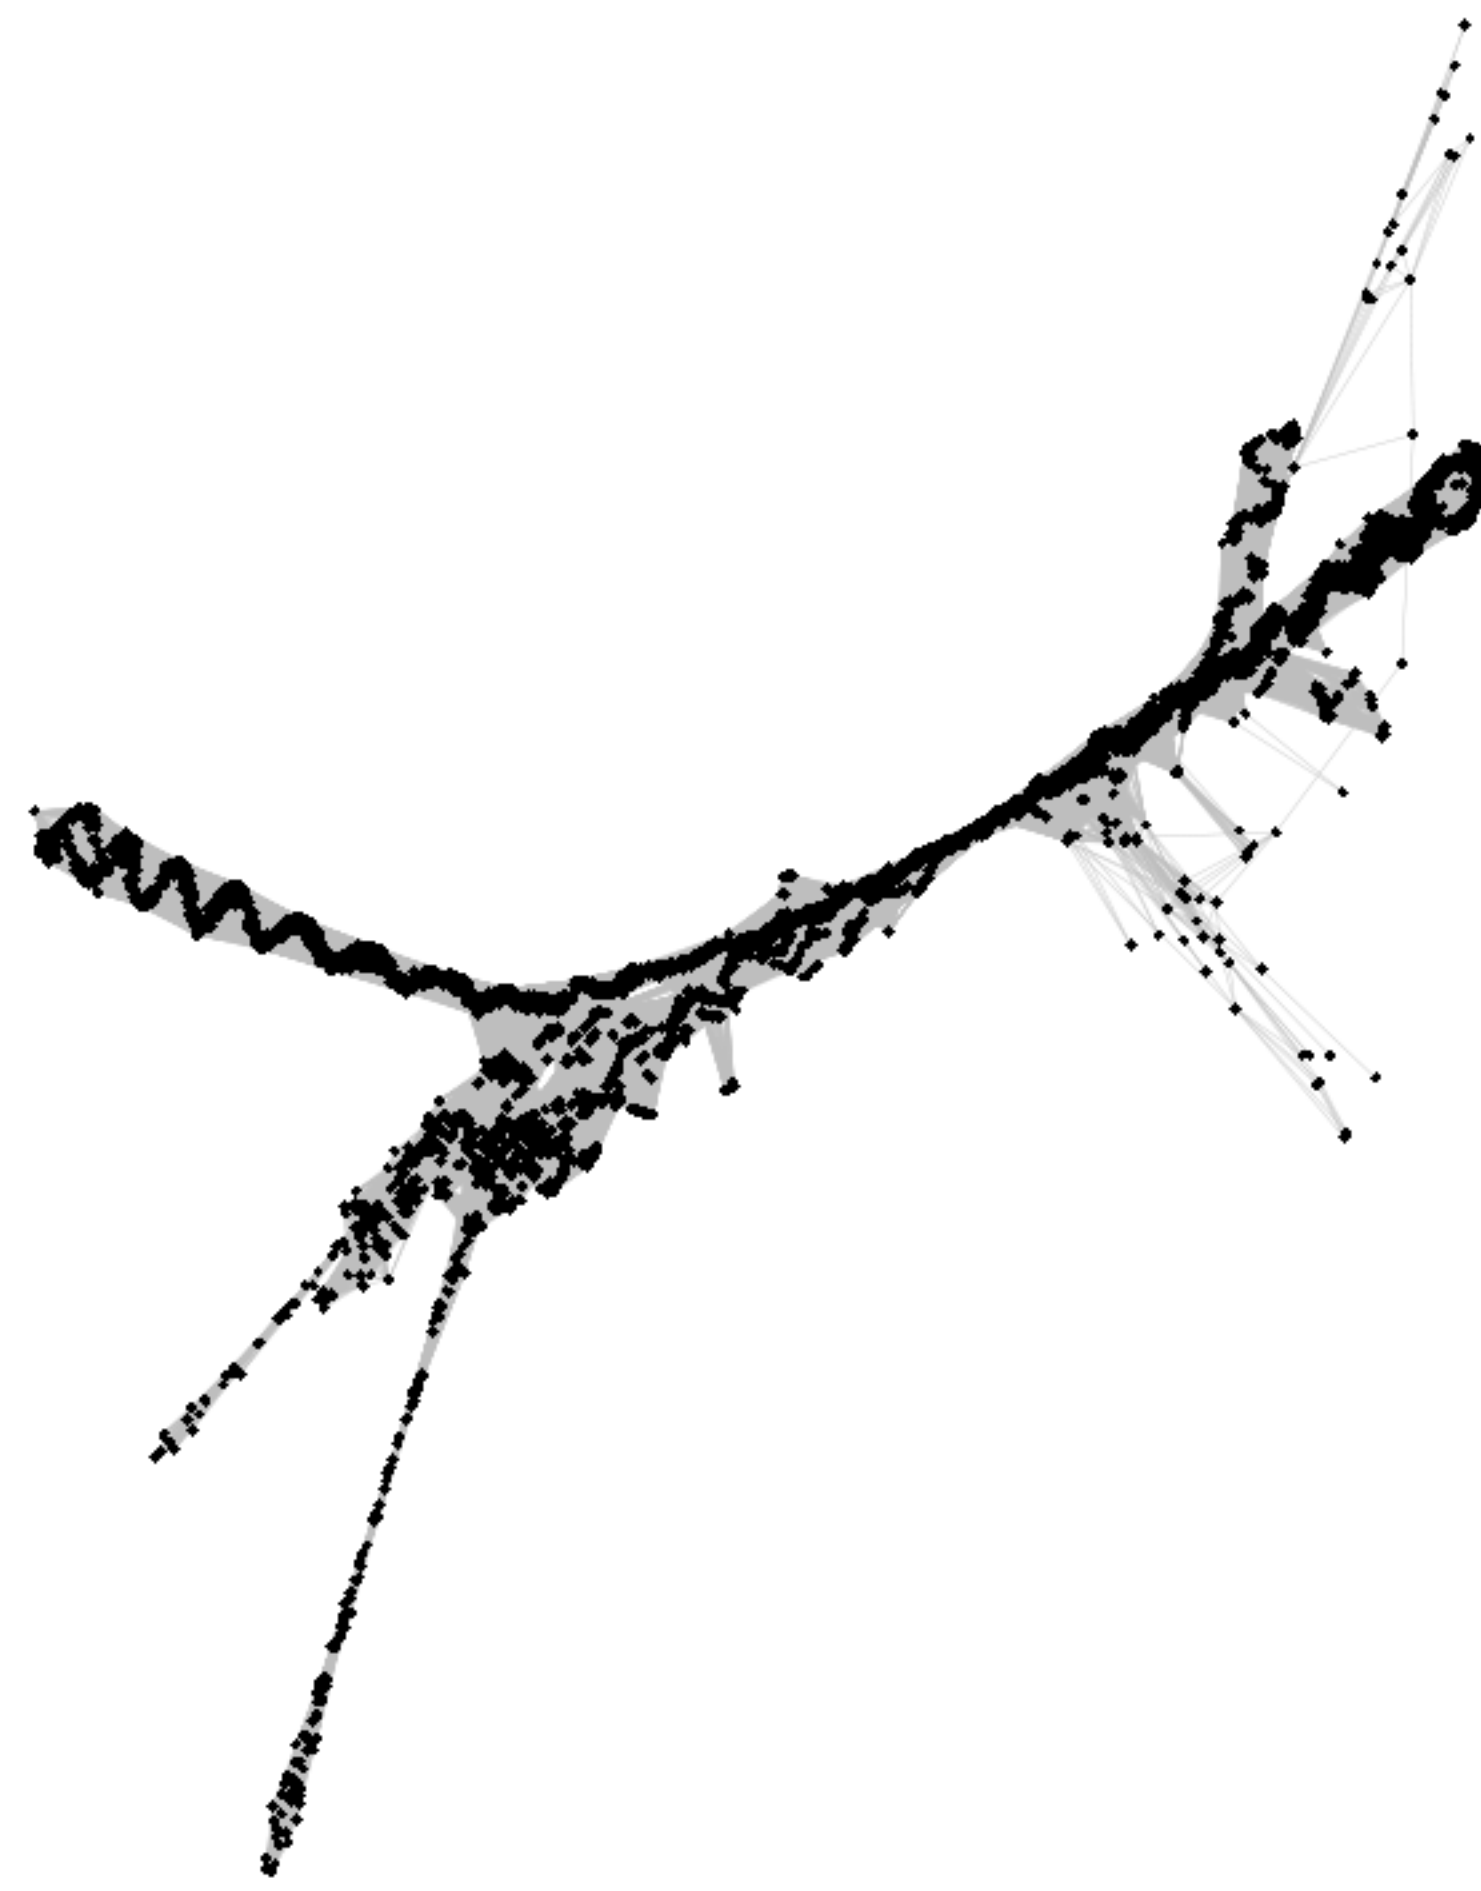

**CL63**

Number of reads: 7361  
Number of pairs: 2014666  
Density: 0.07437  
Diameter: NA  
Mean edge weight: 206.38  
Max. degree: 906

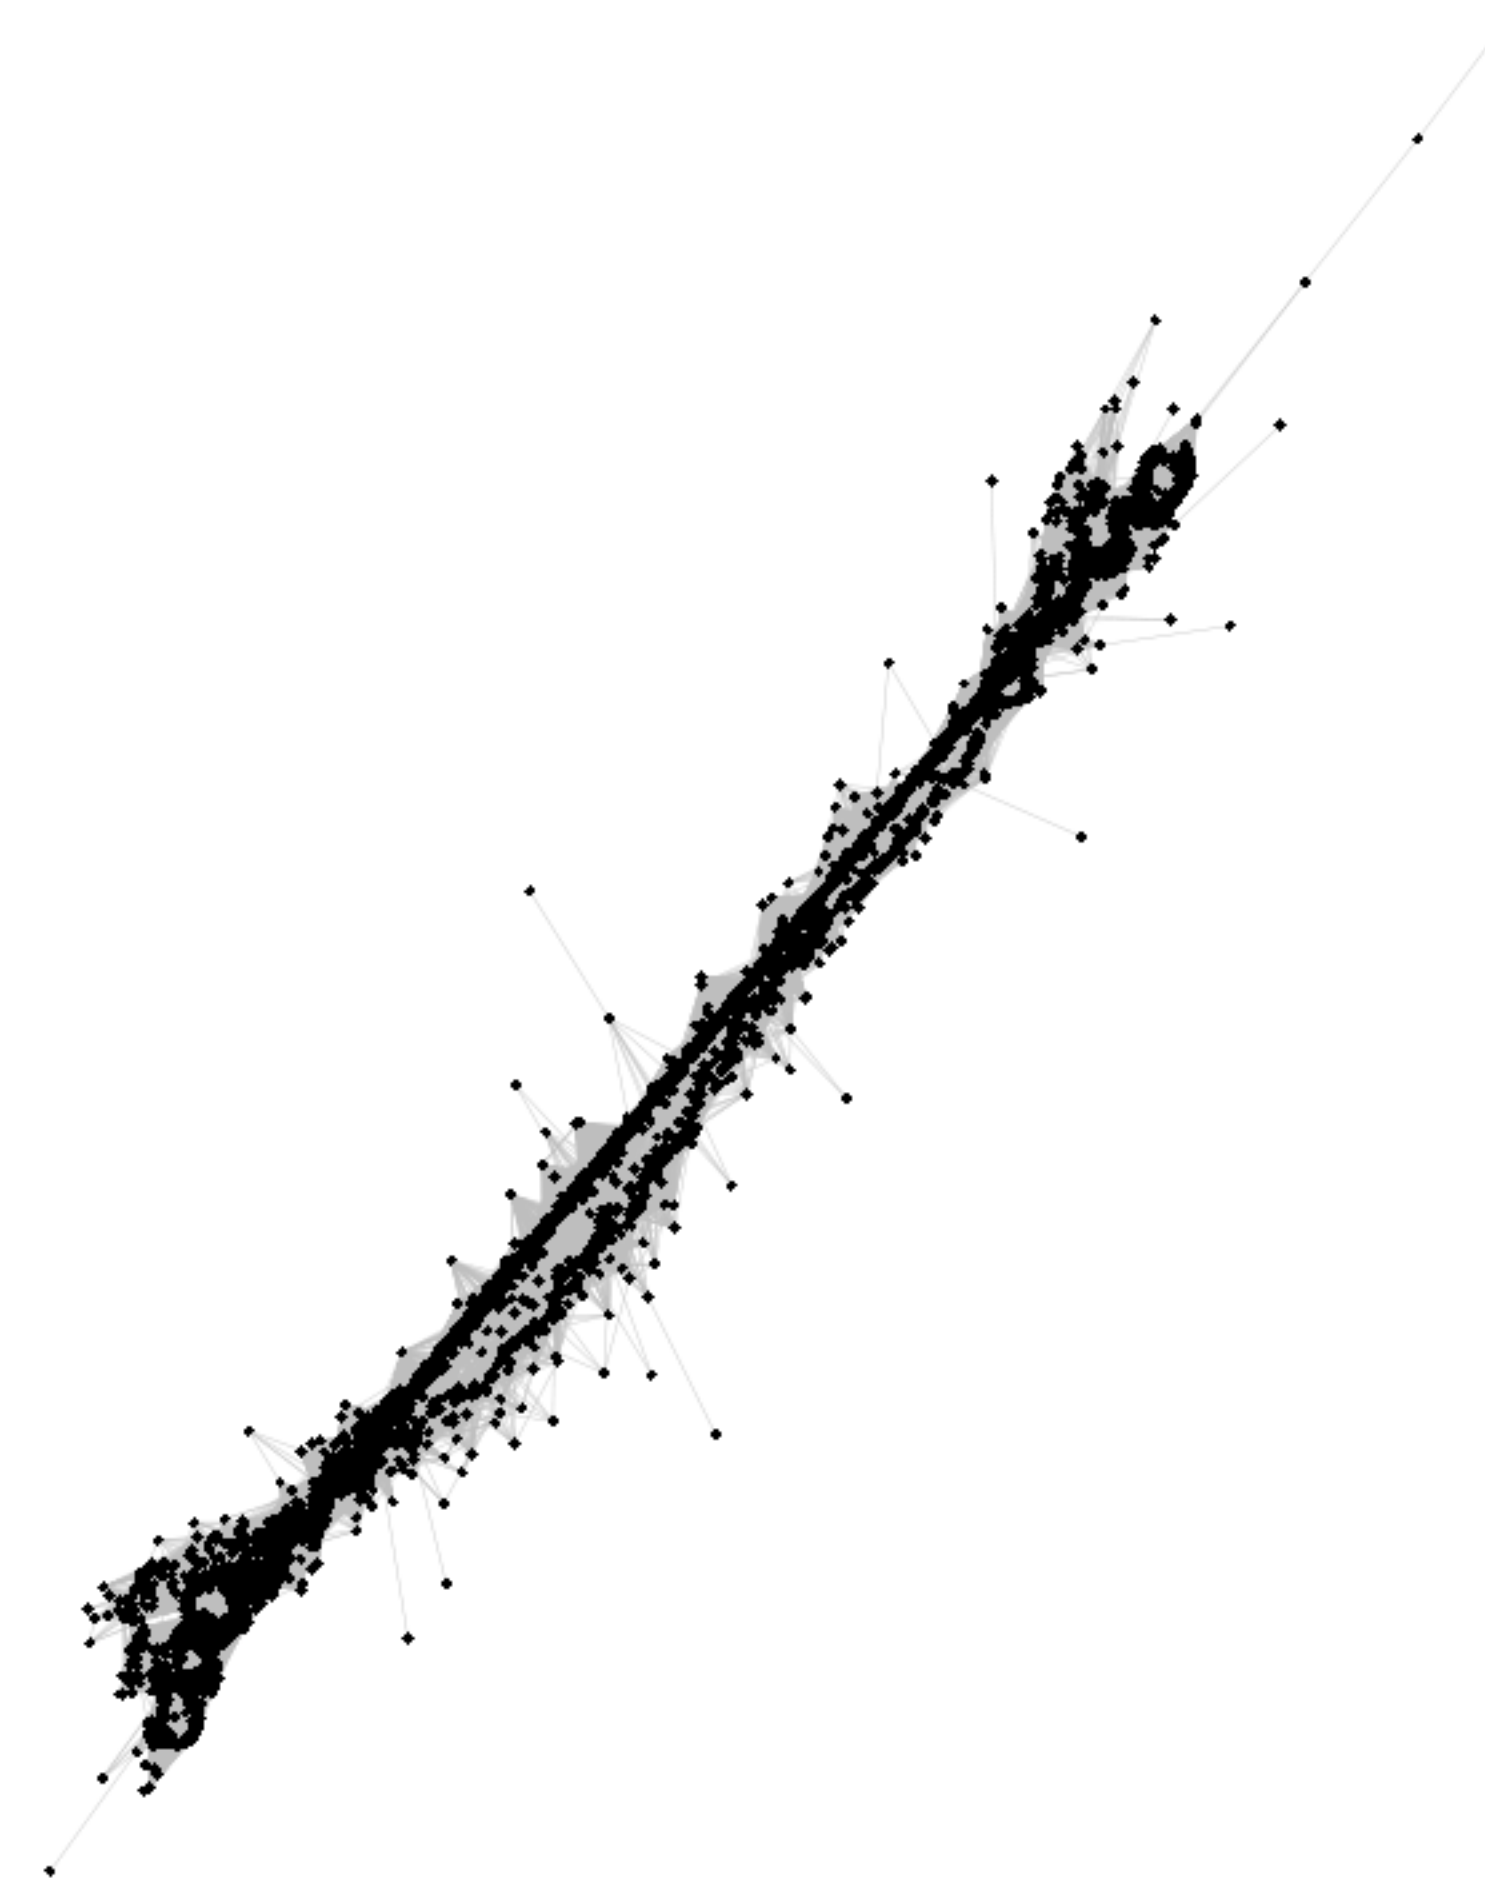

**CL64**

Number of reads: 7353  
Number of pairs: 2032448  
Density: 0.07519  
Diameter: NA  
Mean edge weight: 169.74  
Max. degree: 841

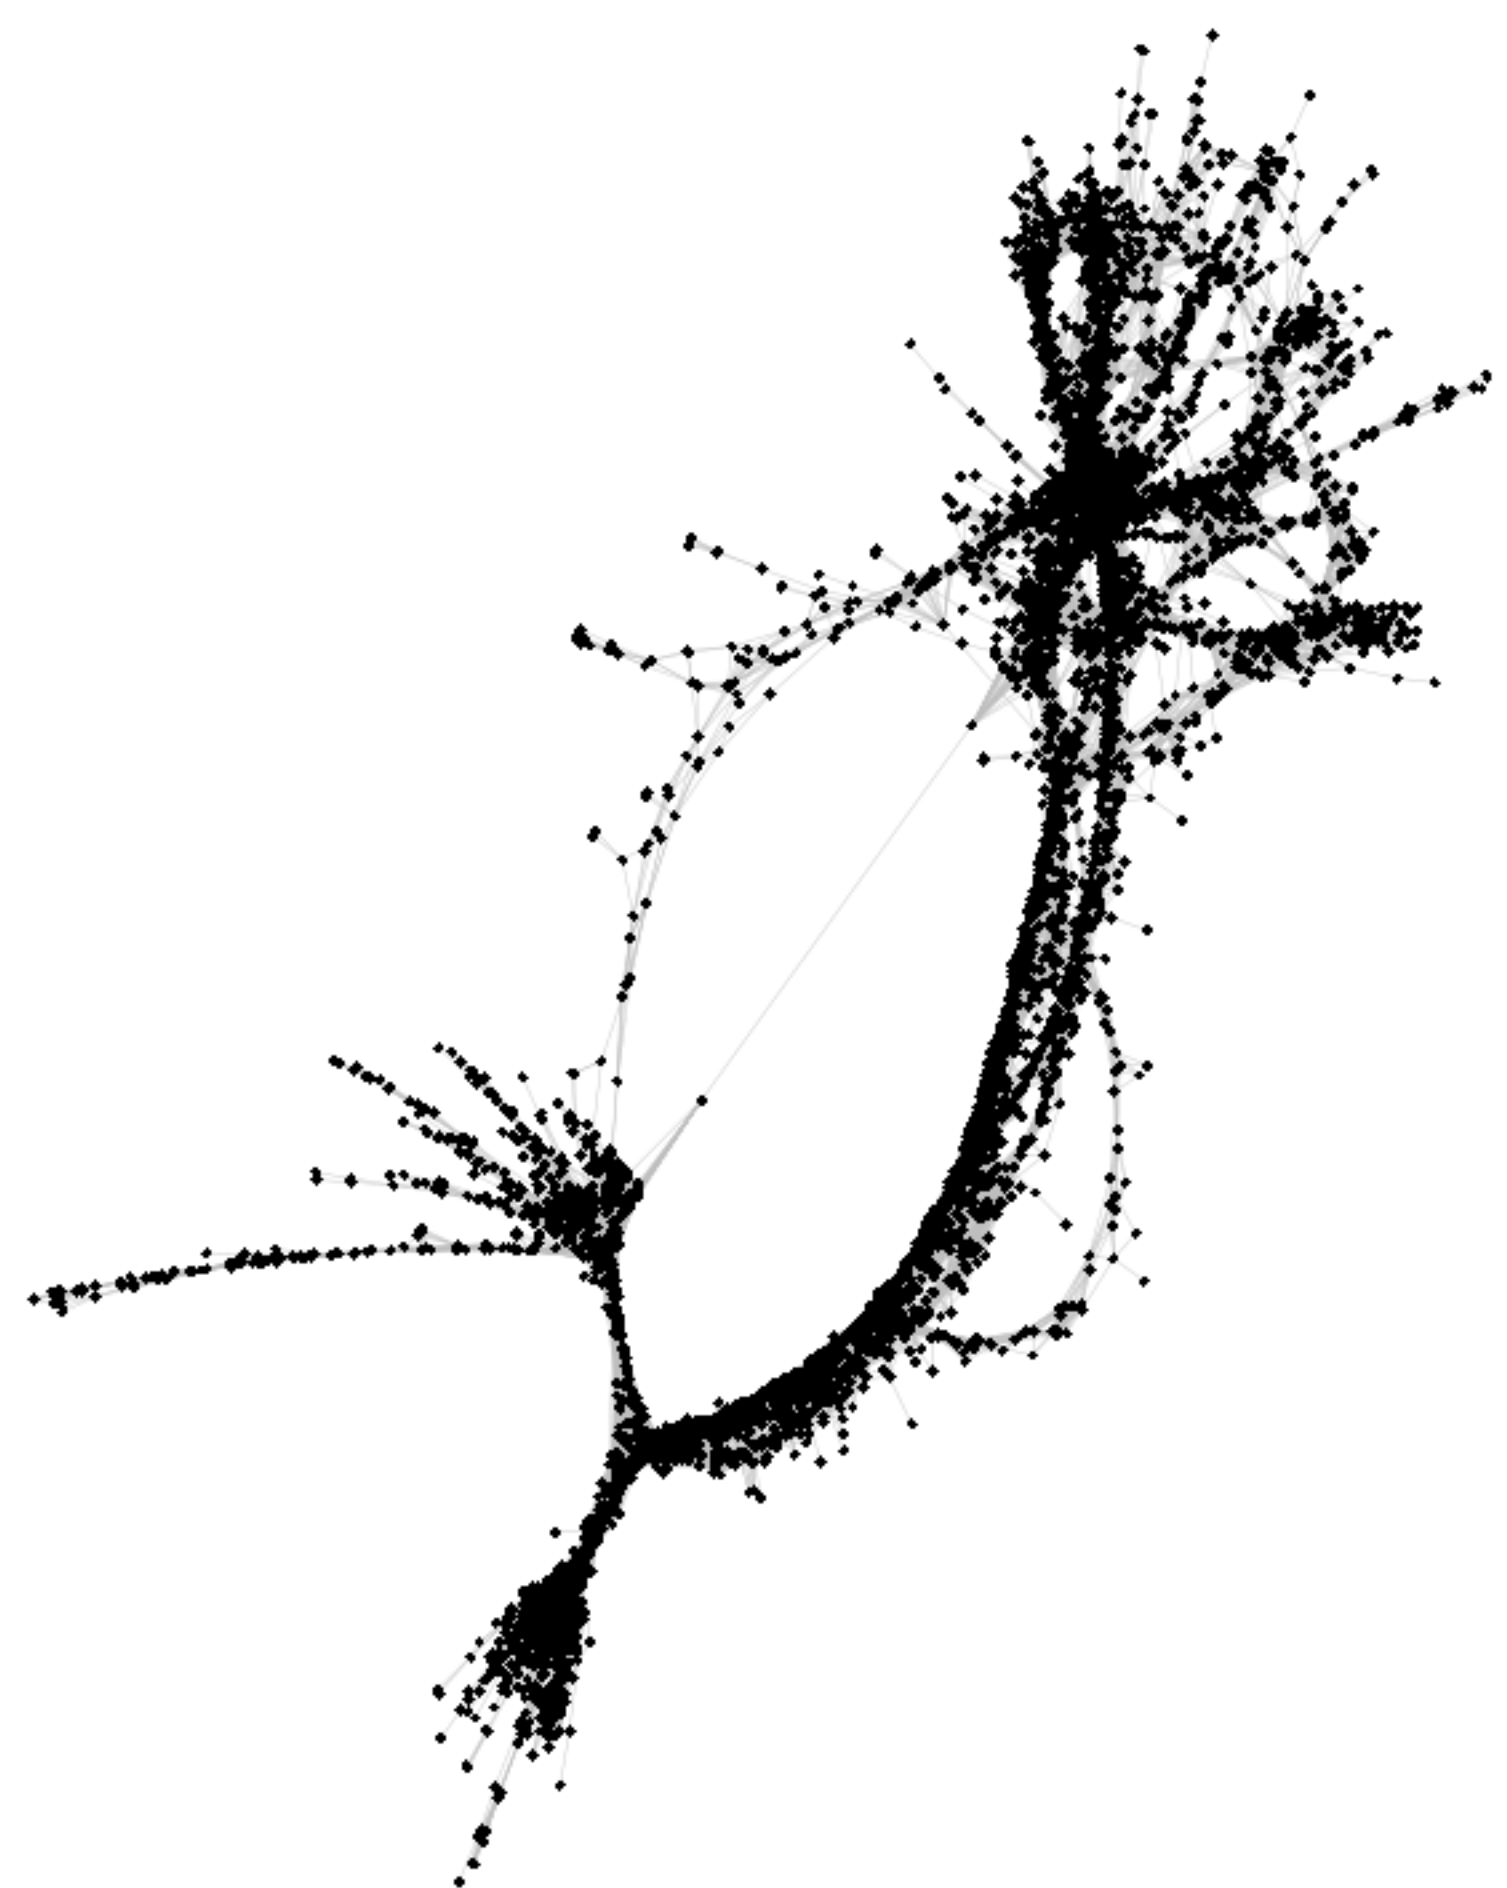

**CL65**

Number of reads: 7188  
Number of pairs: 211960  
Density: 0.008206  
Diameter: NA  
Mean edge weight: 155.29  
Max. degree: 274

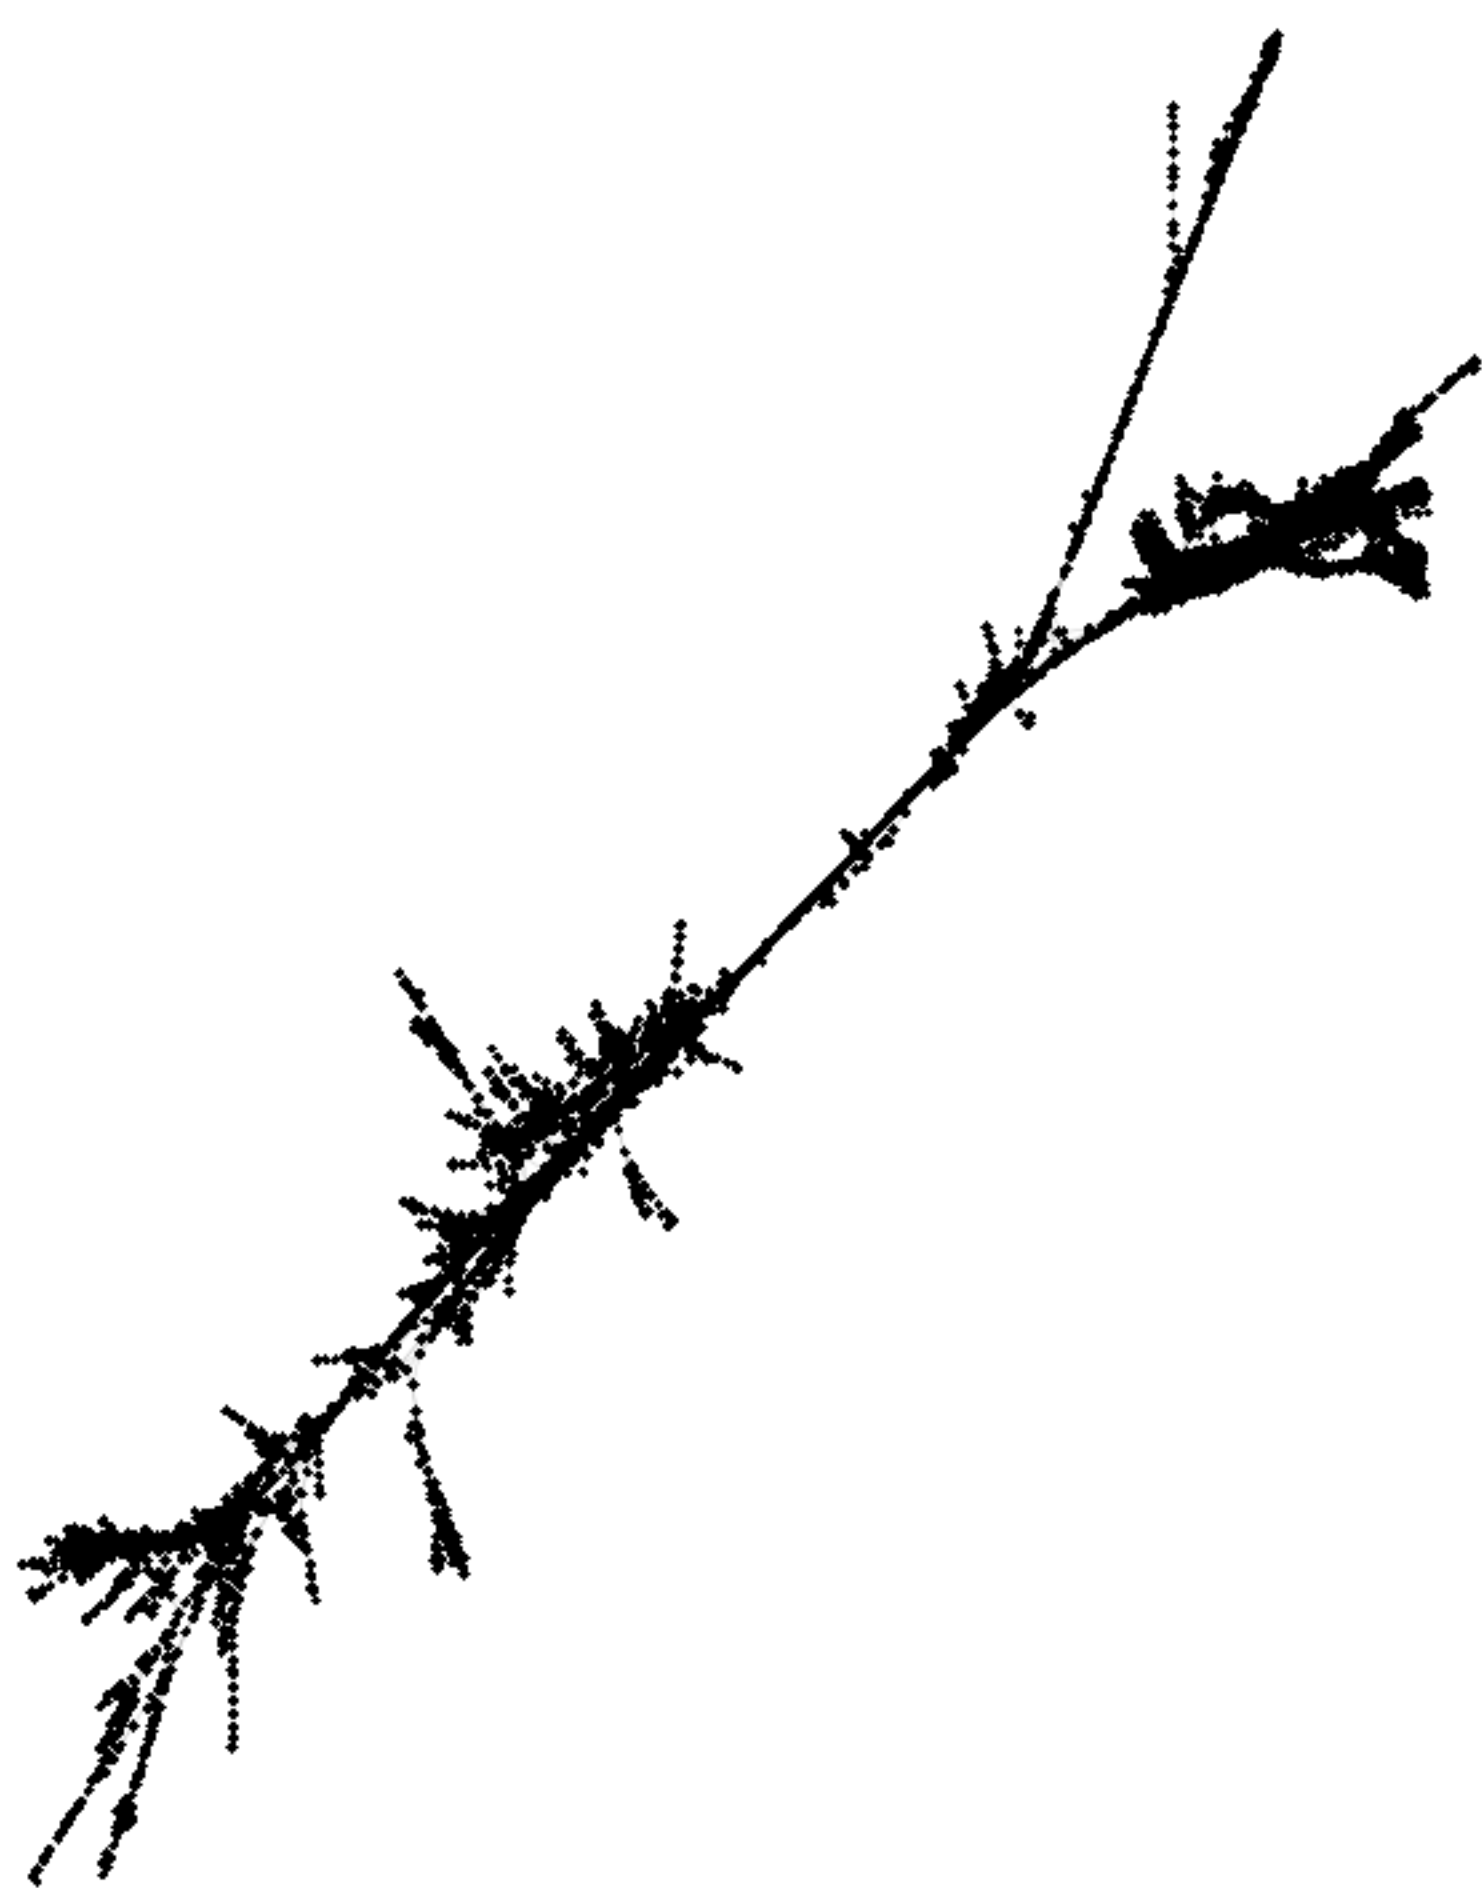

**CL66**

Number of reads: 7045  
Number of pairs: 114150  
Density: 0.004601  
Diameter: NA  
Mean edge weight: 163.03  
Max. degree: 205

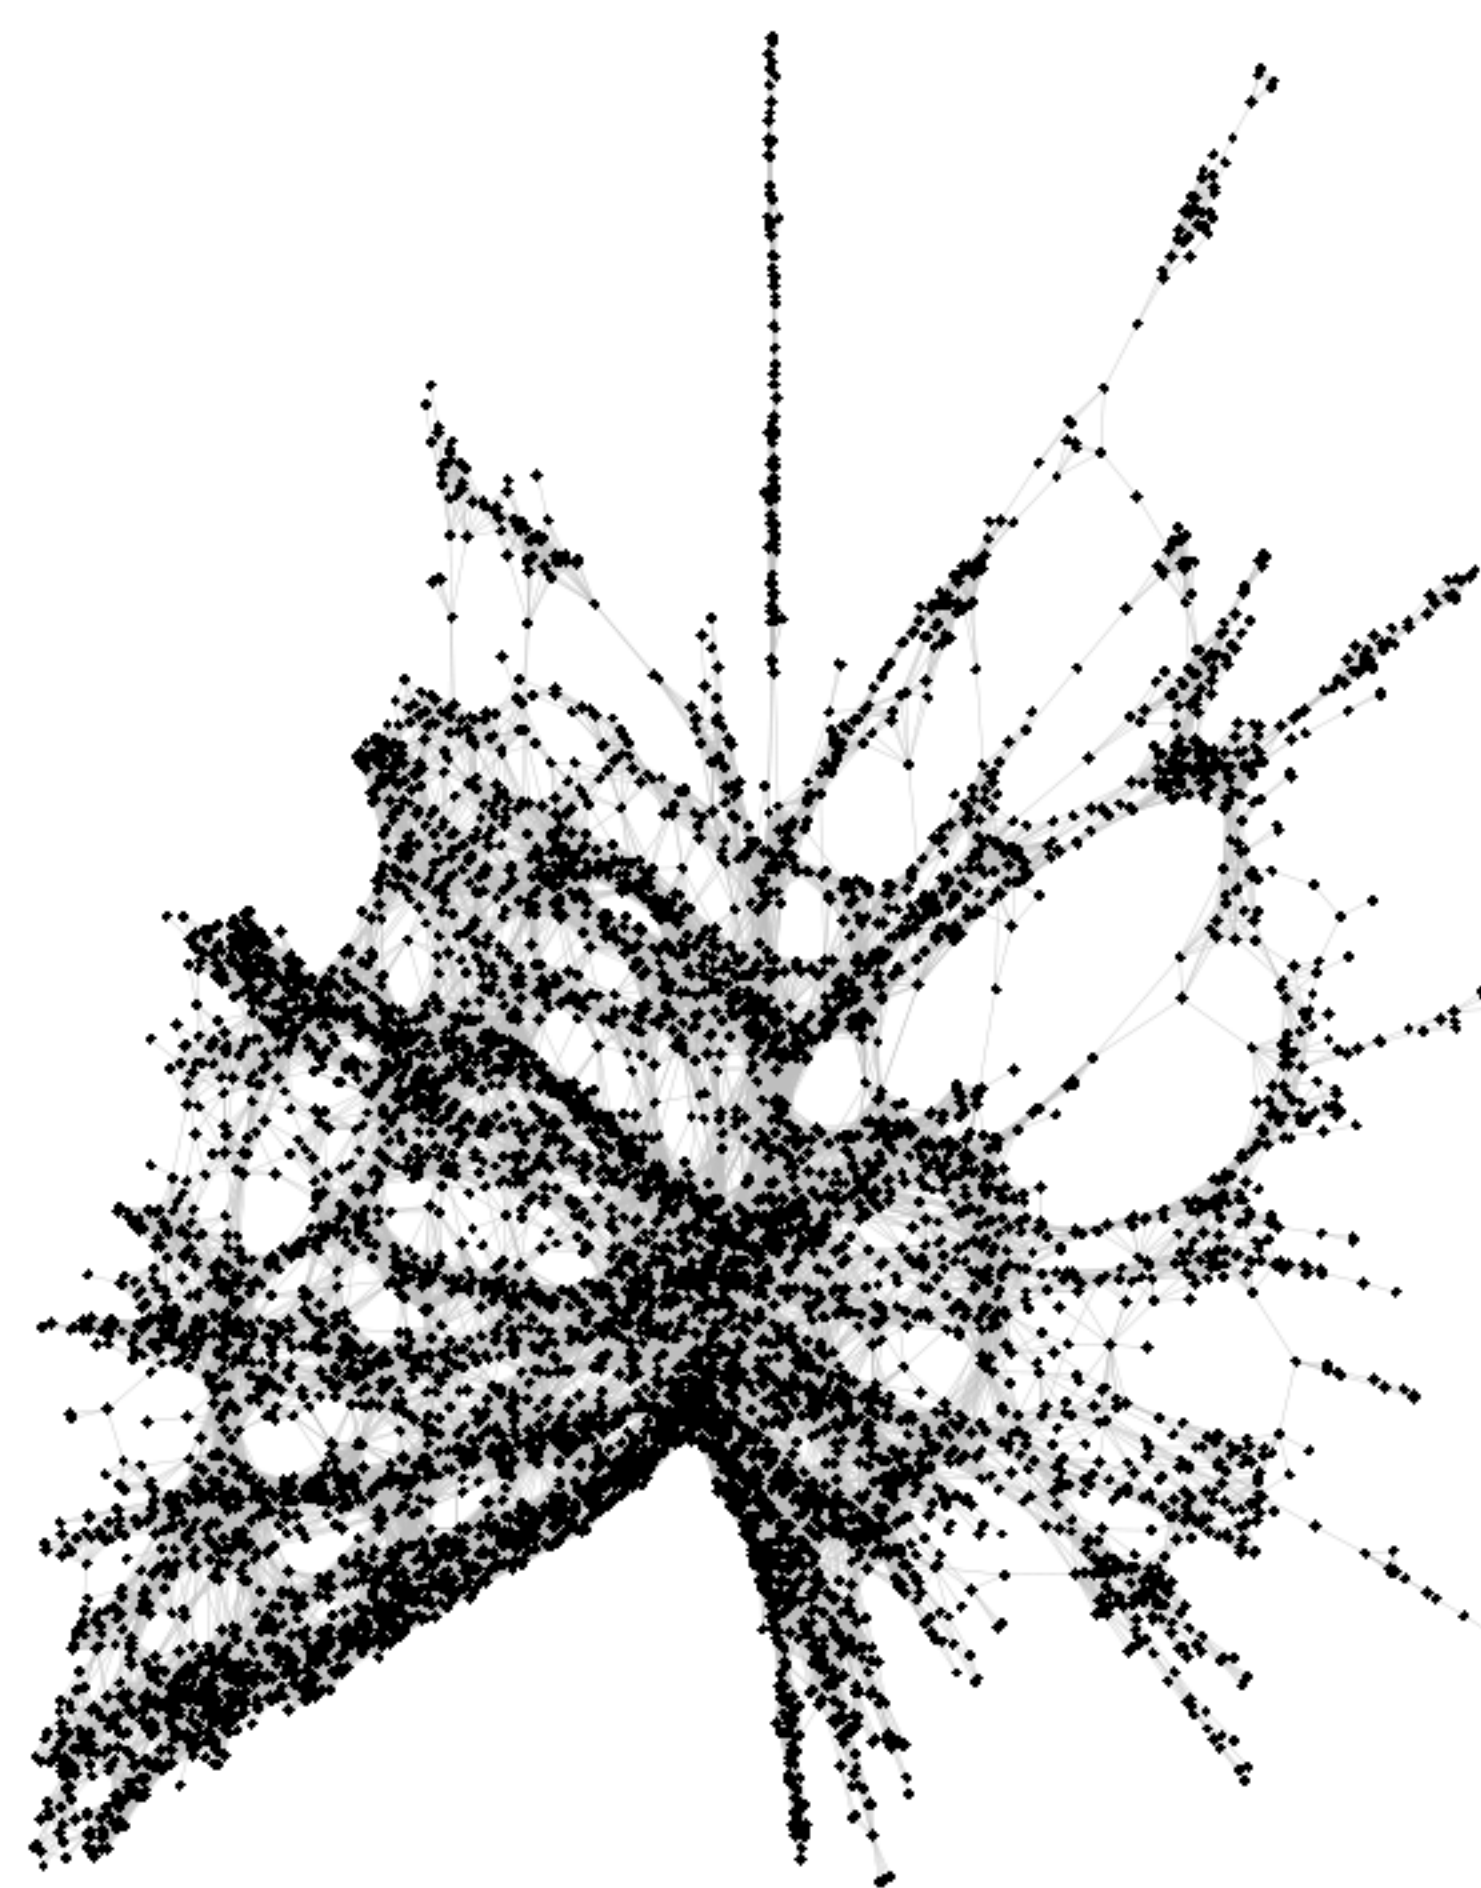

**CL67**

Number of reads: 7023  
Number of pairs: 110965  
Density: 0.0045  
Diameter: NA  
Mean edge weight: 158.82  
Max. degree: 113

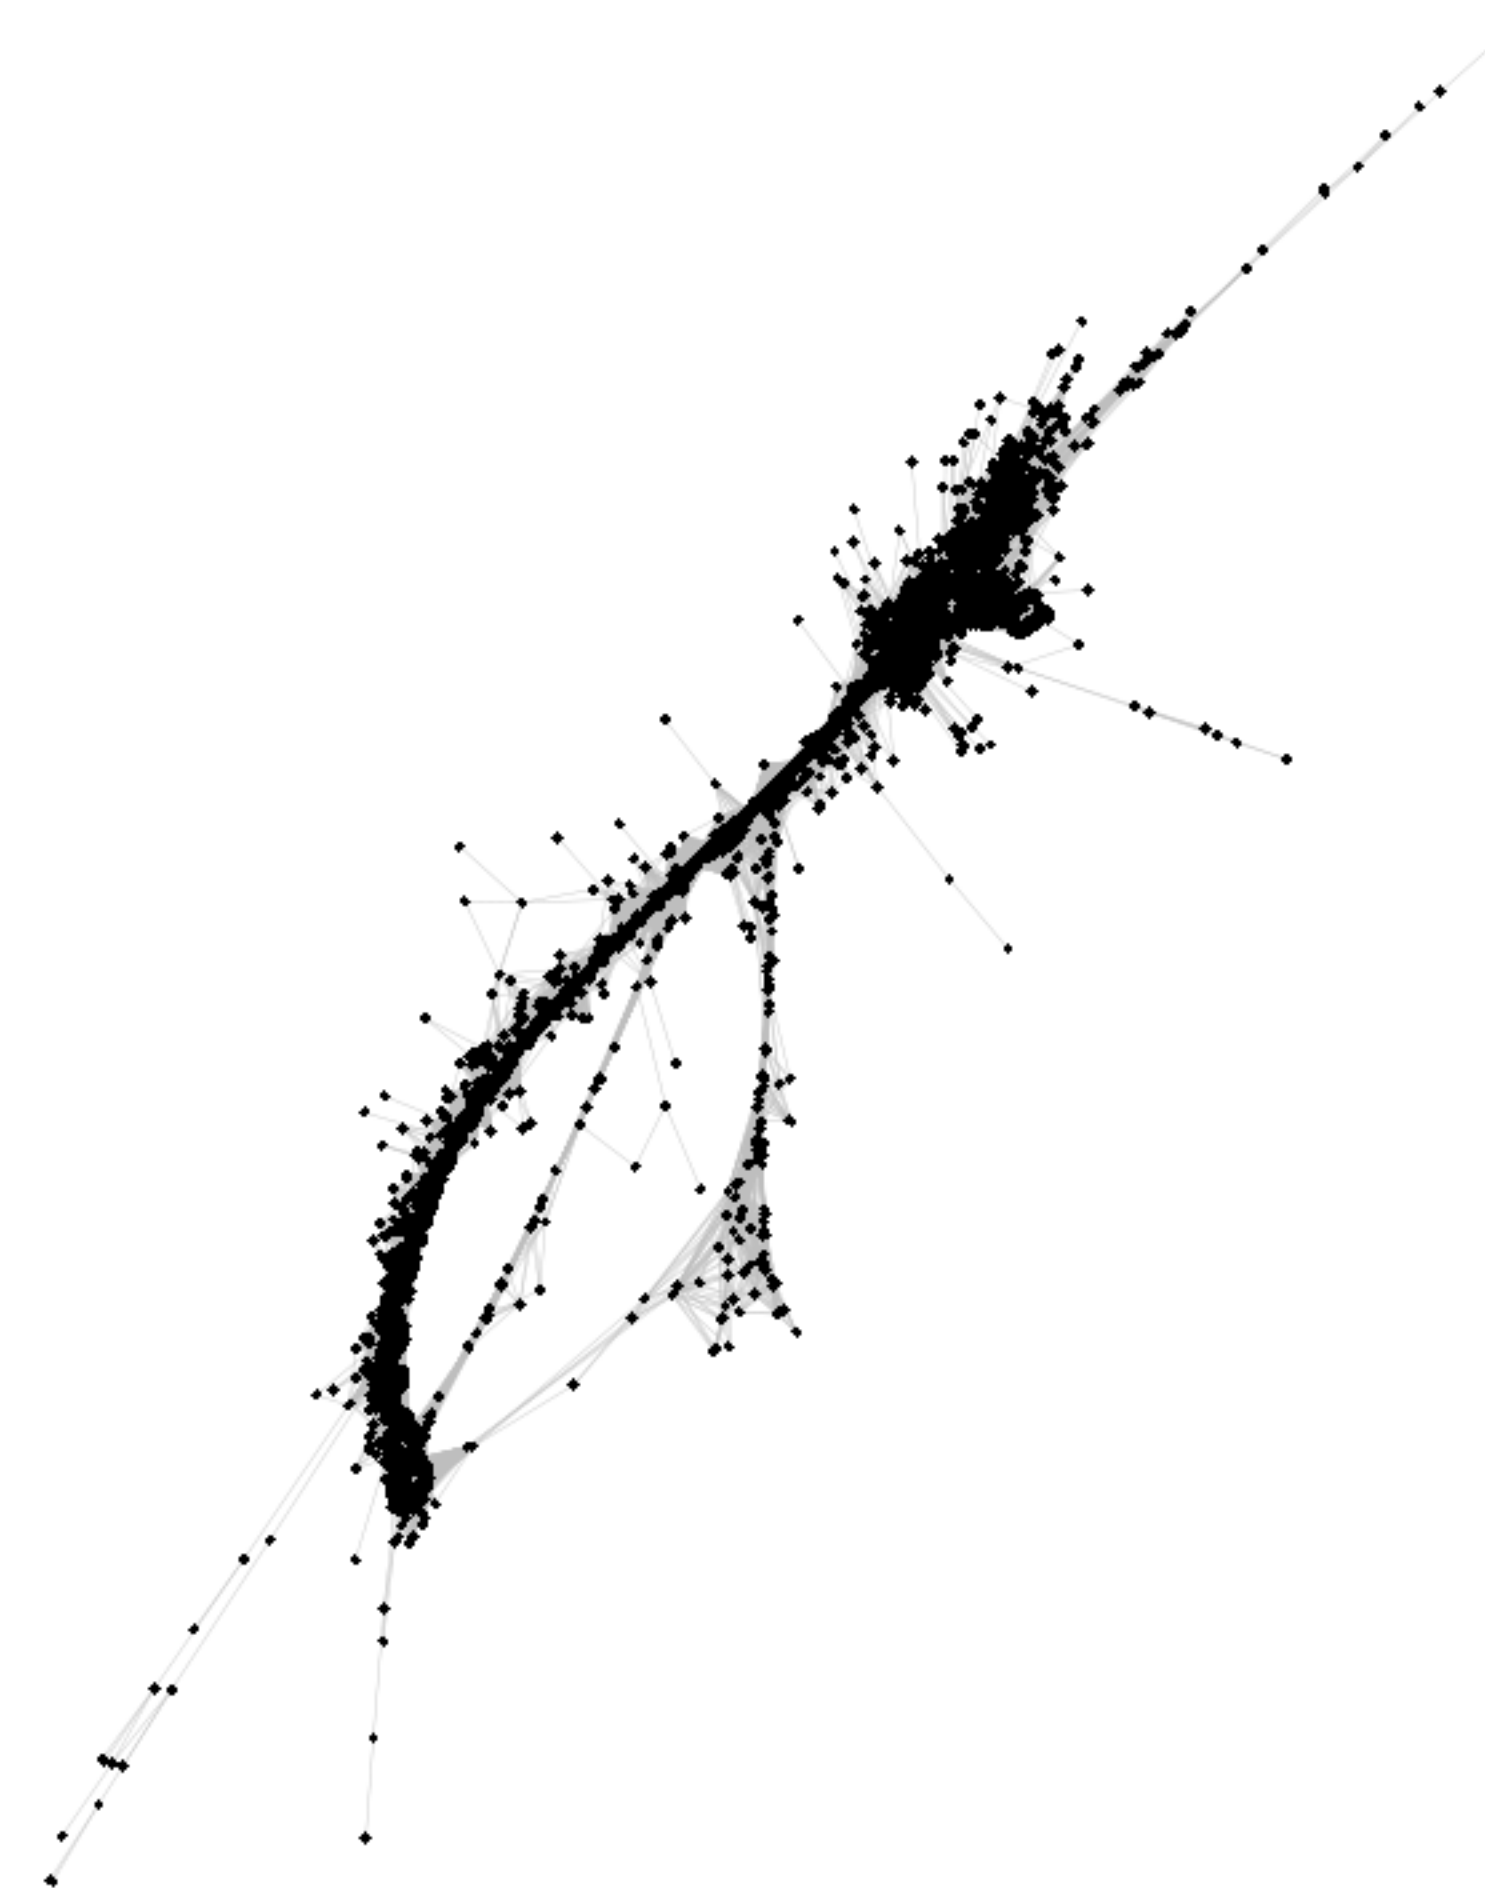

**CL68**

Number of reads: 6872  
Number of pairs: 1272521  
Density: 0.0539  
Diameter: NA  
Mean edge weight: 162.68  
Max. degree: 1011

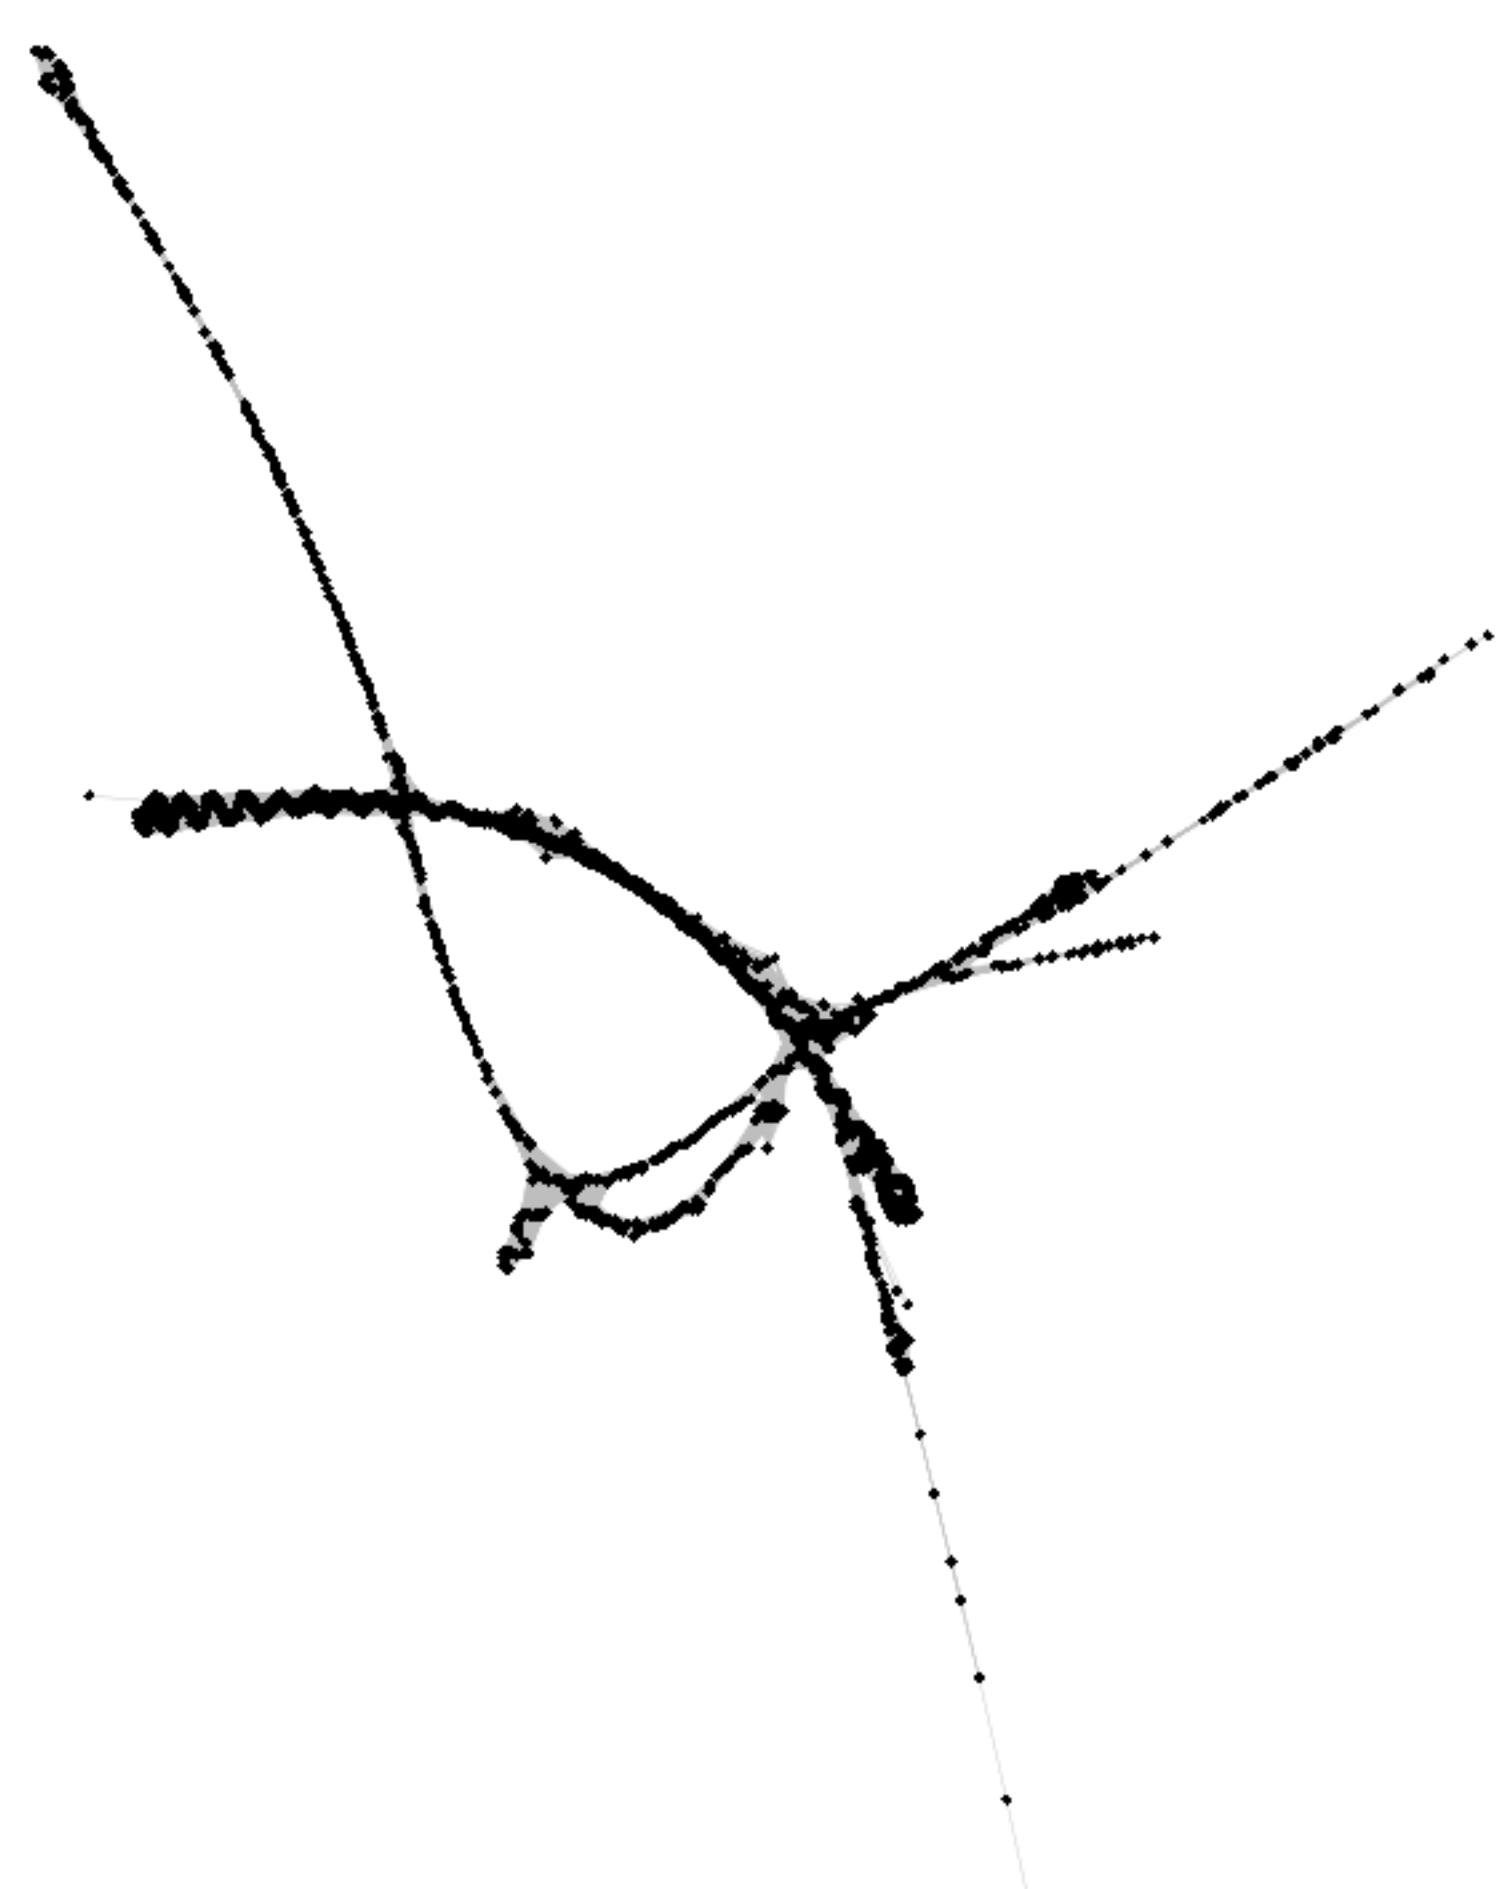

**CL69**

Number of reads: 6552  
Number of pairs: 1405173  
Density: 0.06548  
Diameter: NA  
Mean edge weight: 211.06  
Max. degree: 632

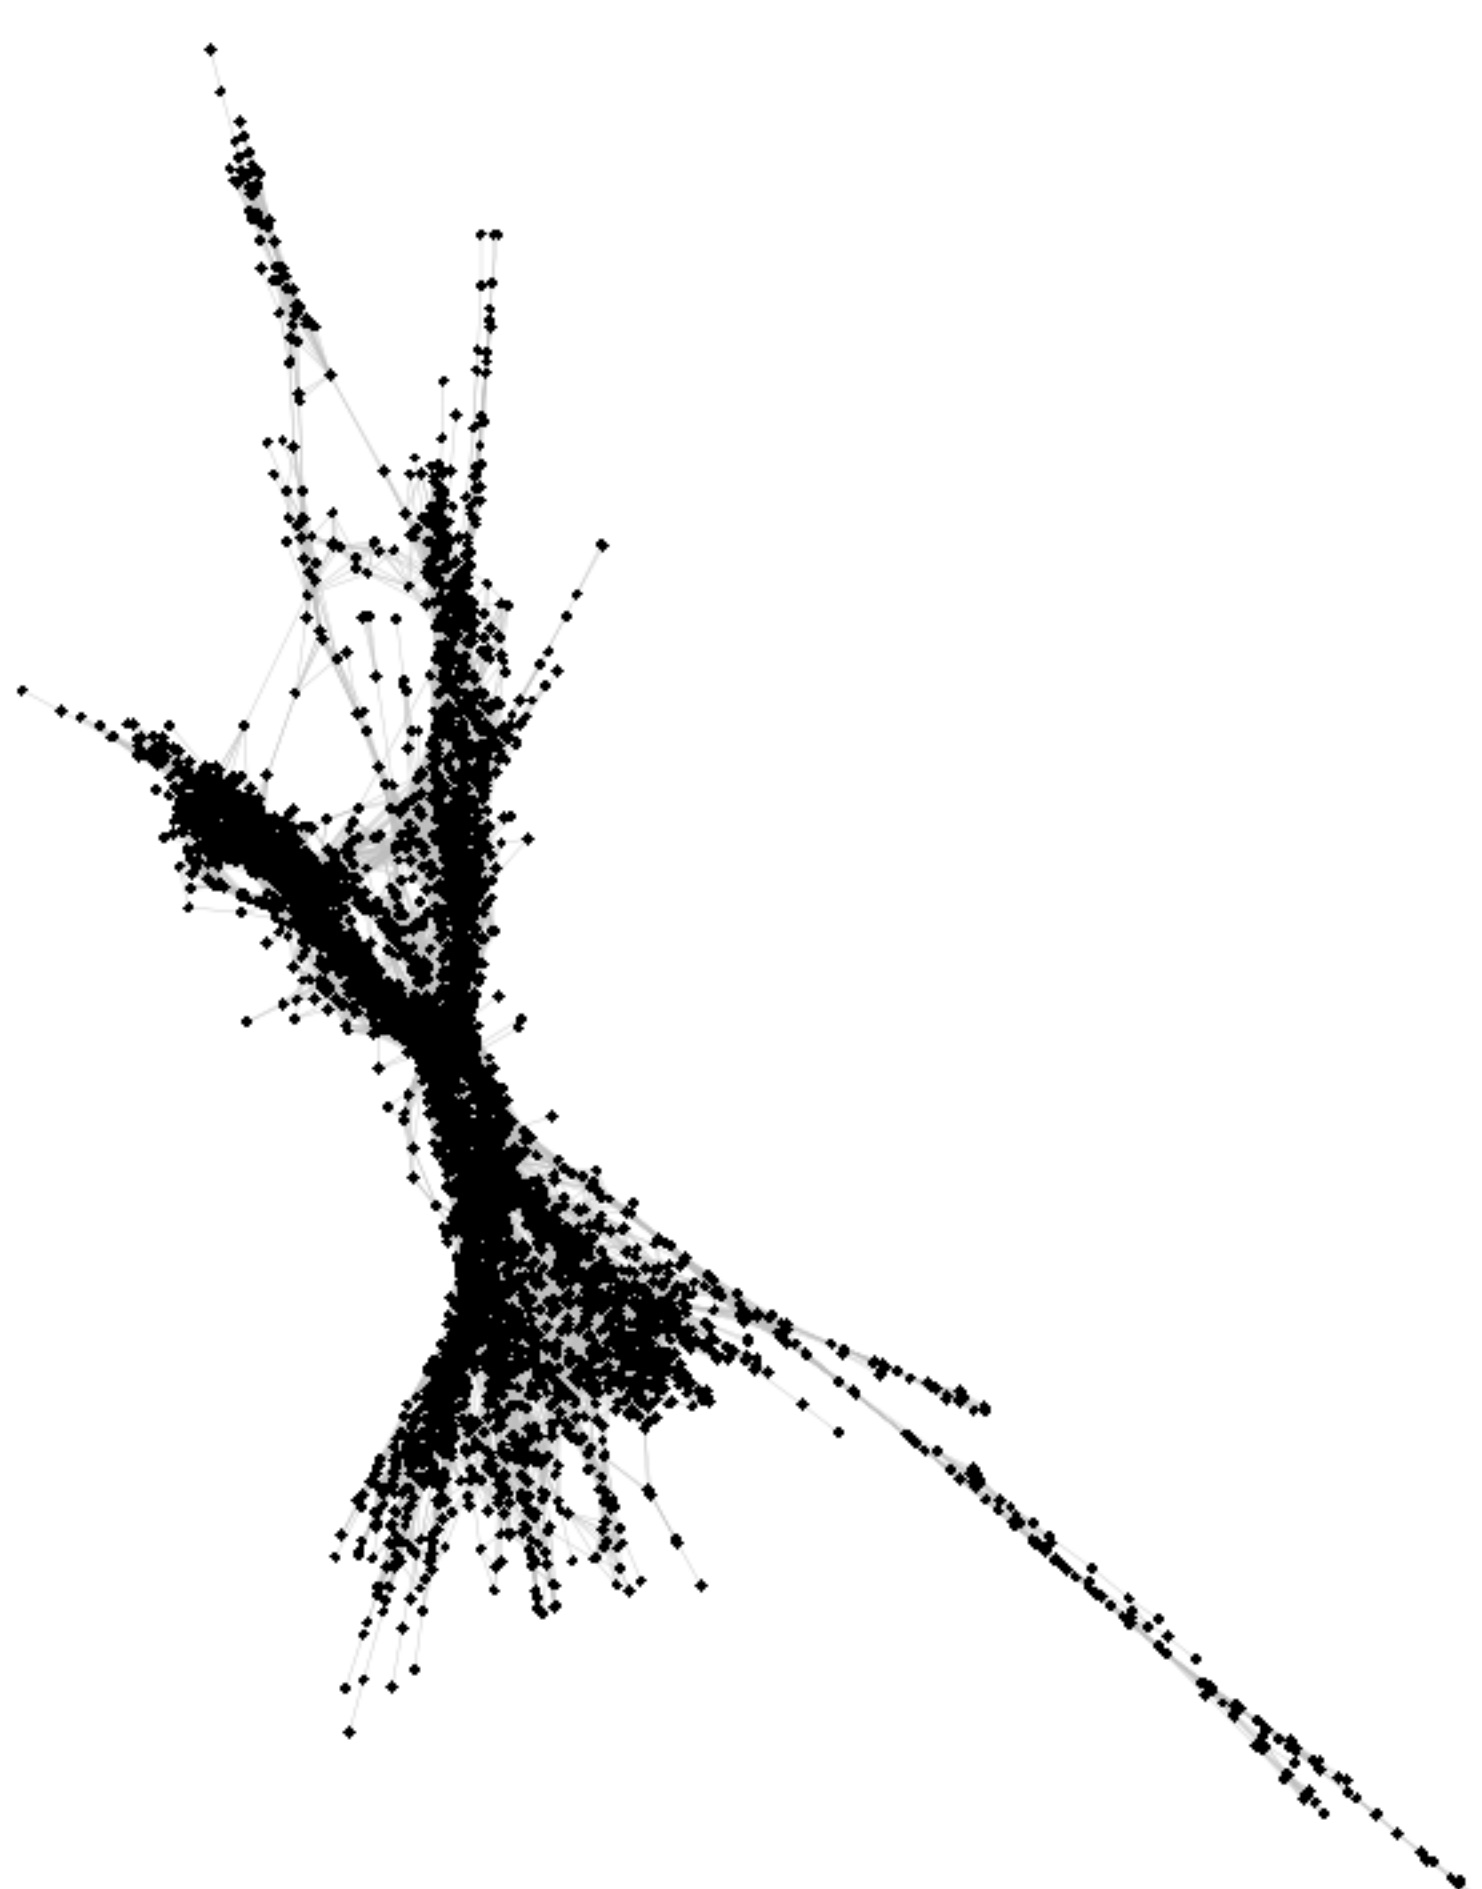

**CL70**

Number of reads: 6533  
Number of pairs: 243125  
Density: 0.01139  
Diameter: NA  
Mean edge weight: 144.72  
Max. degree: 416

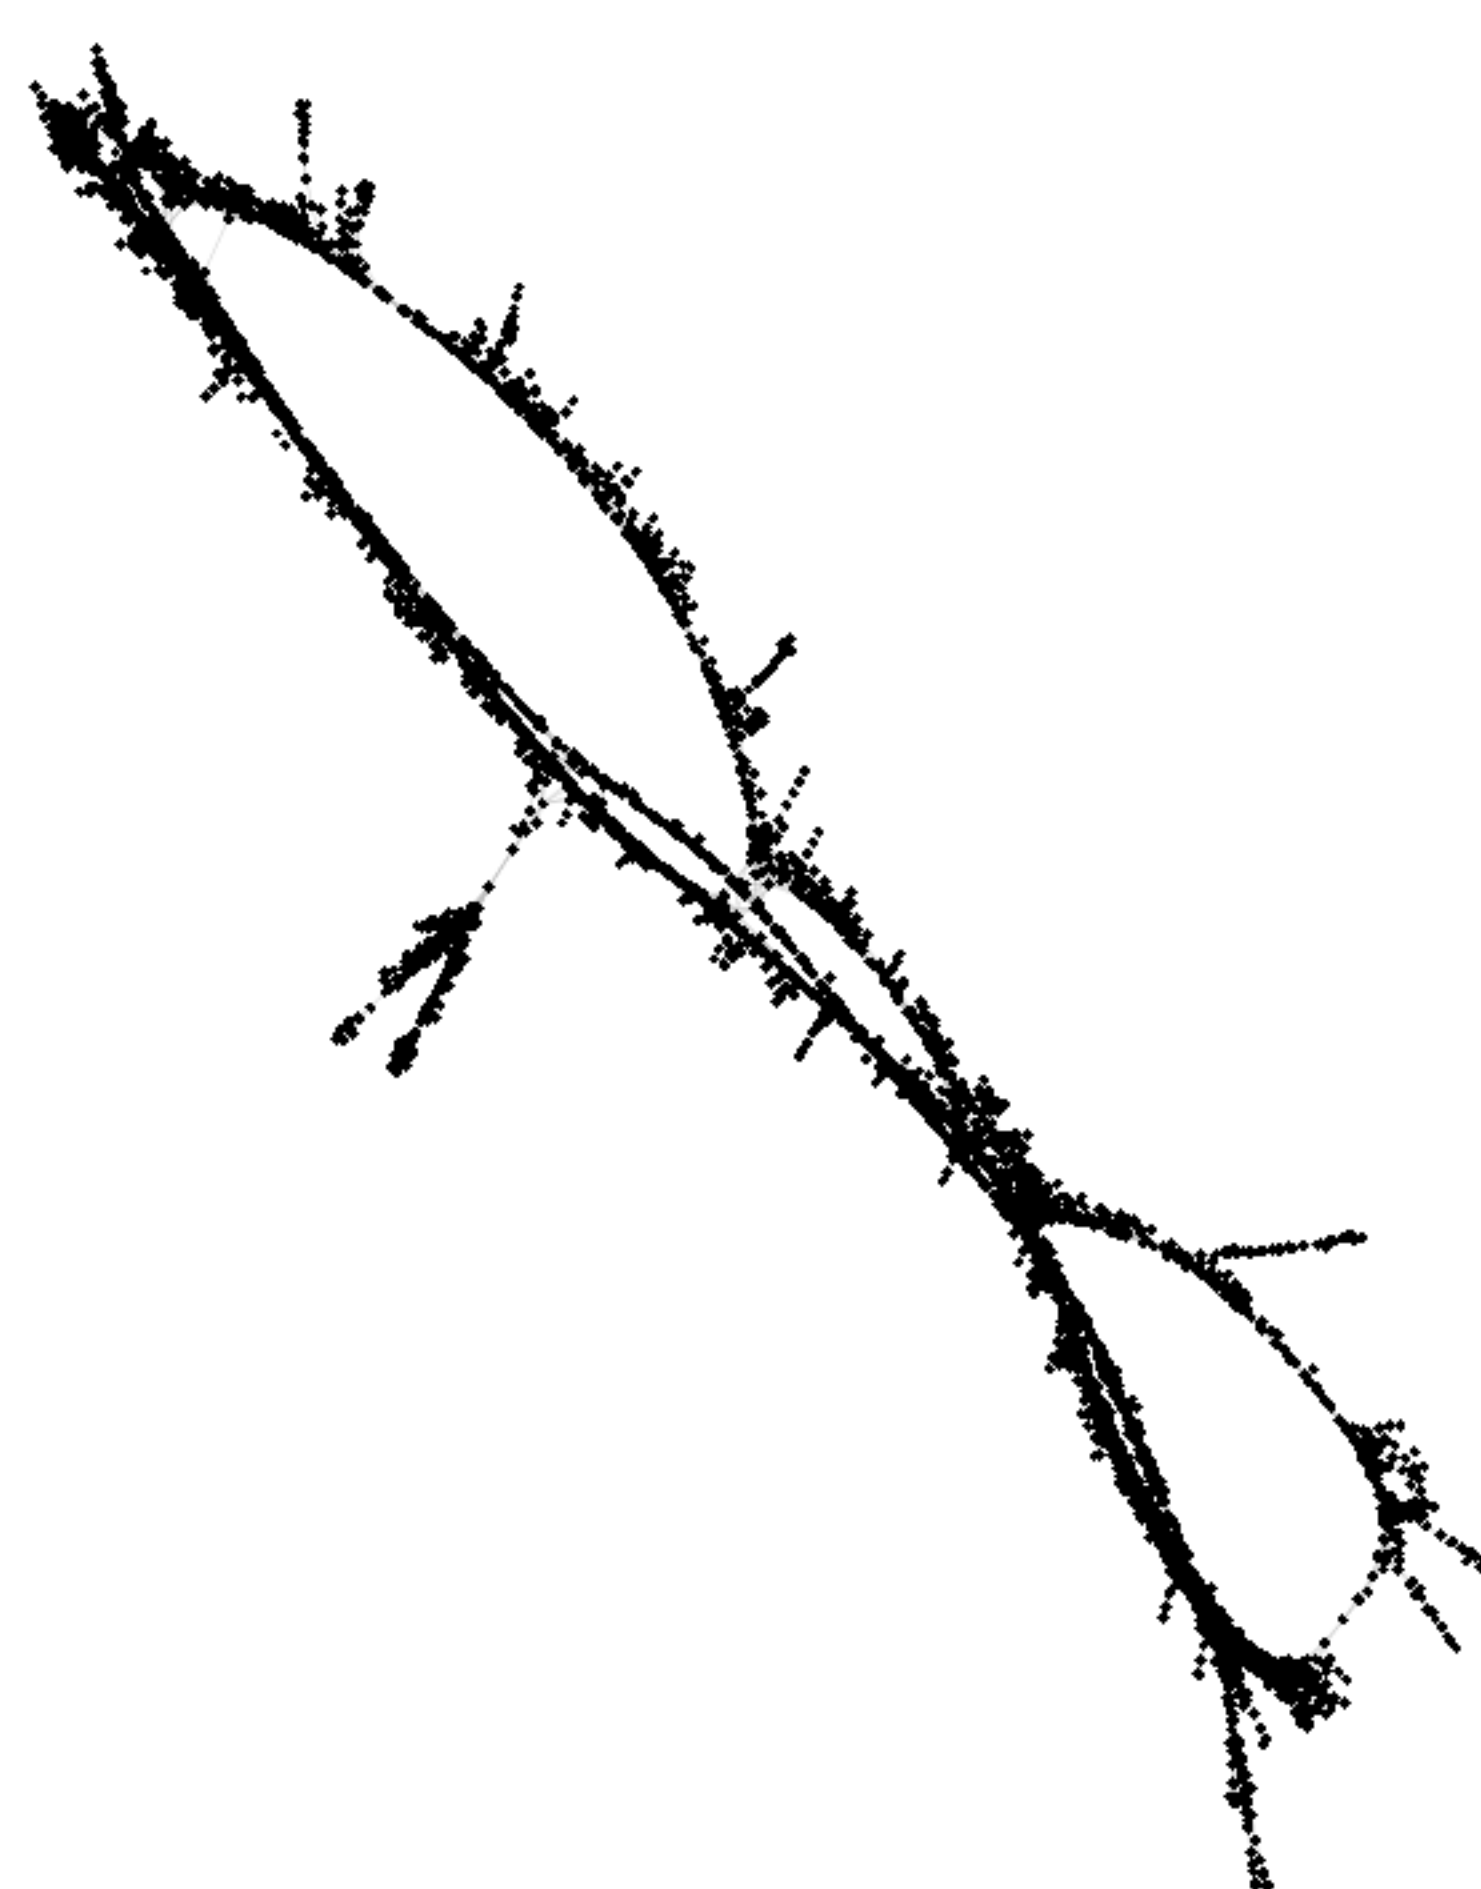

**CL71**

Number of reads: 6465  
Number of pairs: 96847  
Density: 0.004635  
Diameter: NA  
Mean edge weight: 158.4  
Max. degree: 119

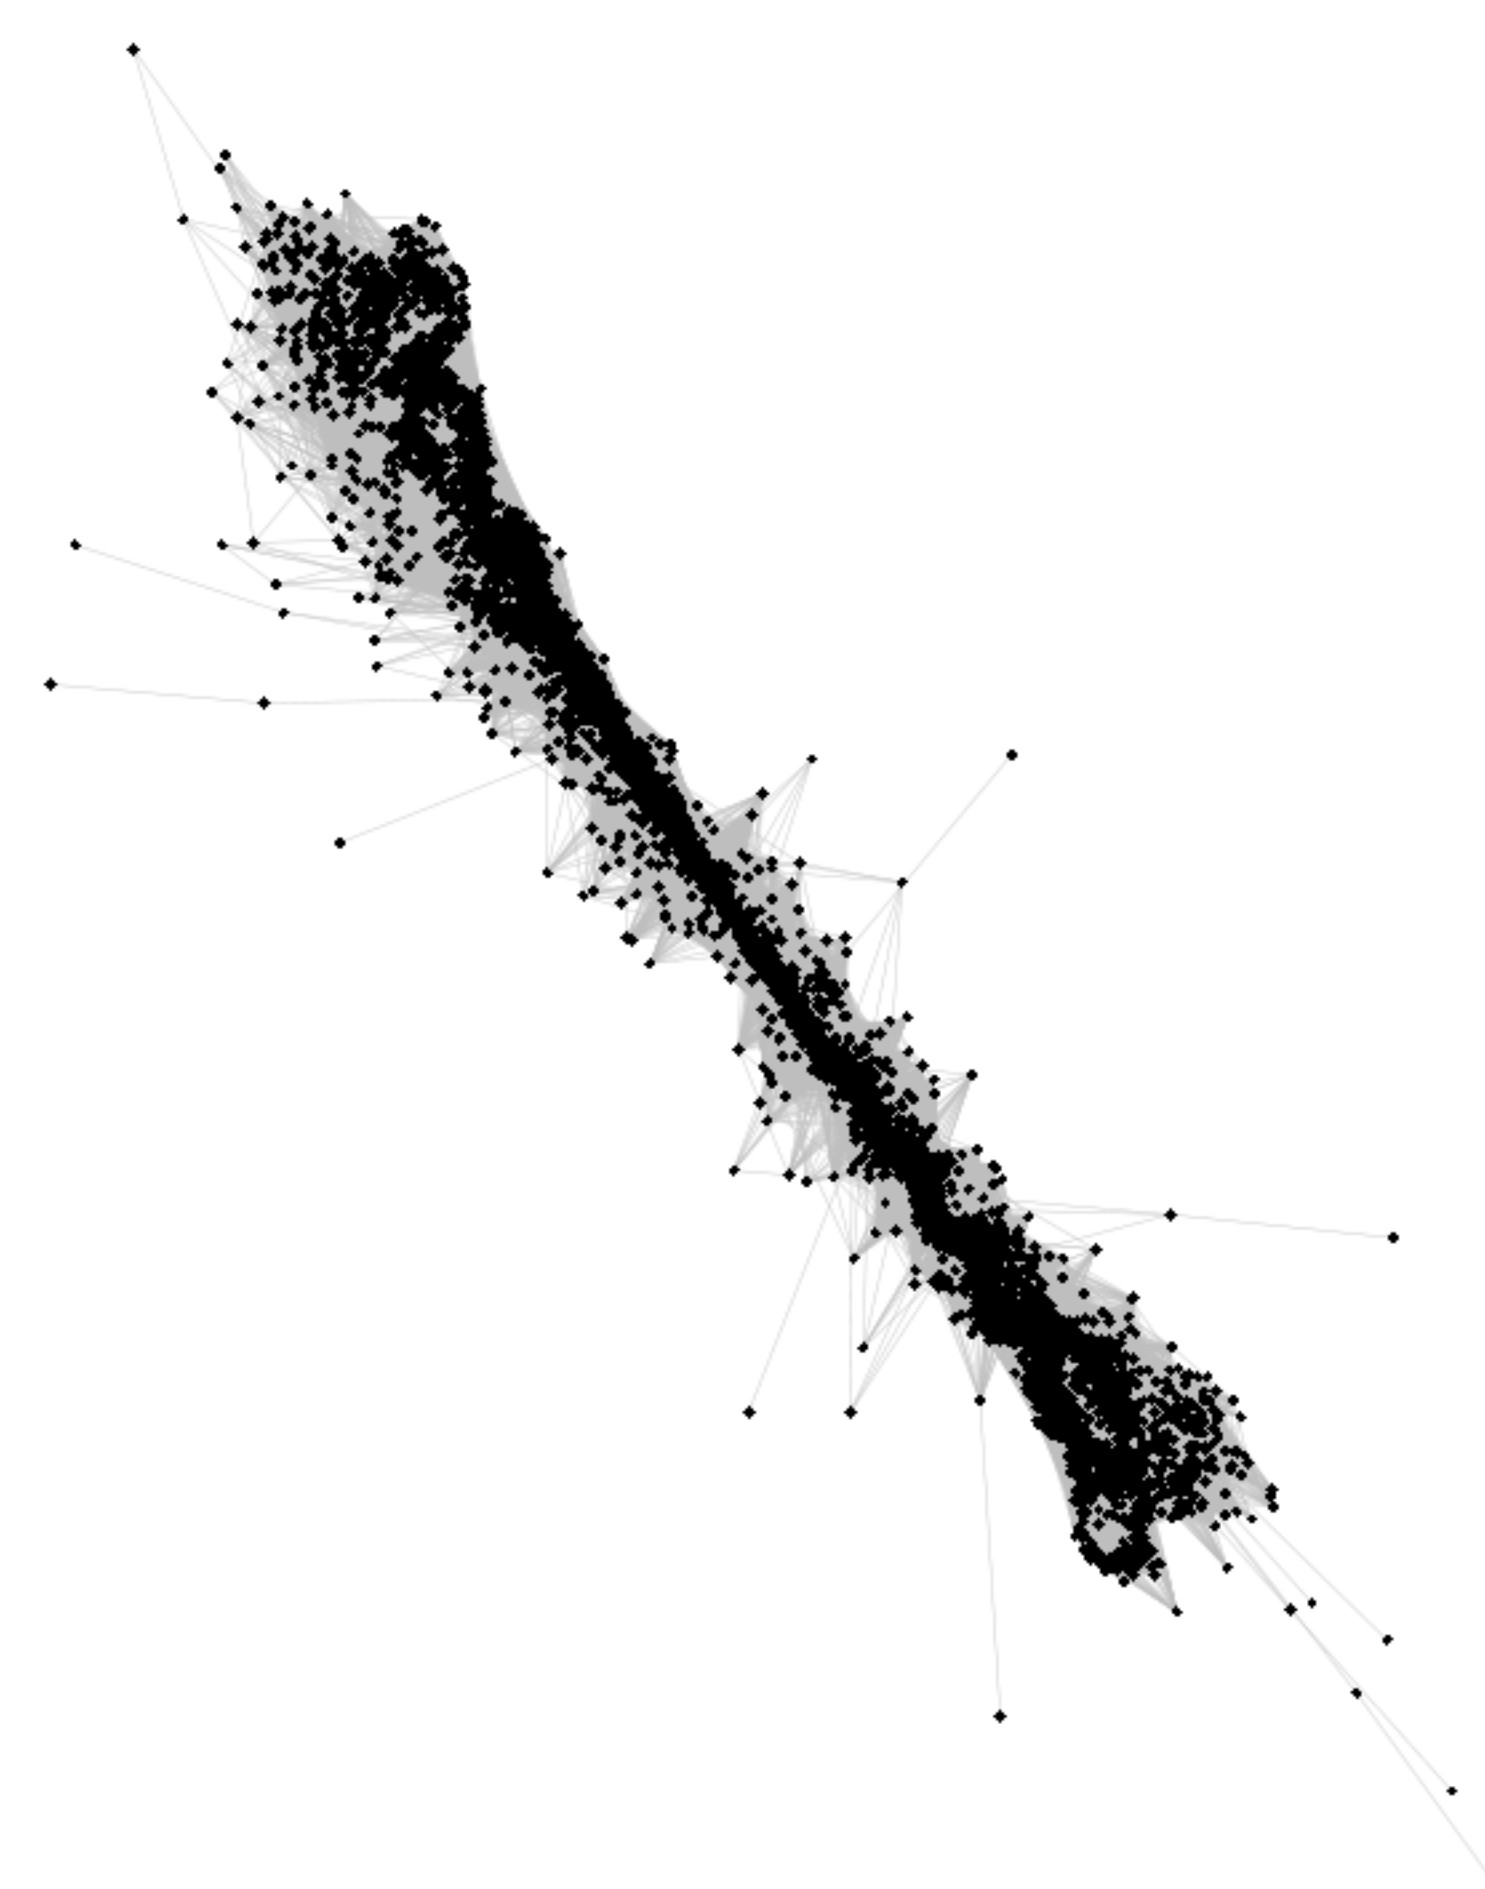

**CL72**

Number of reads: 6369  
Number of pairs: 2482950  
Density: 0.1224  
Diameter: NA  
Mean edge weight: 167.48  
Max. degree: 1173

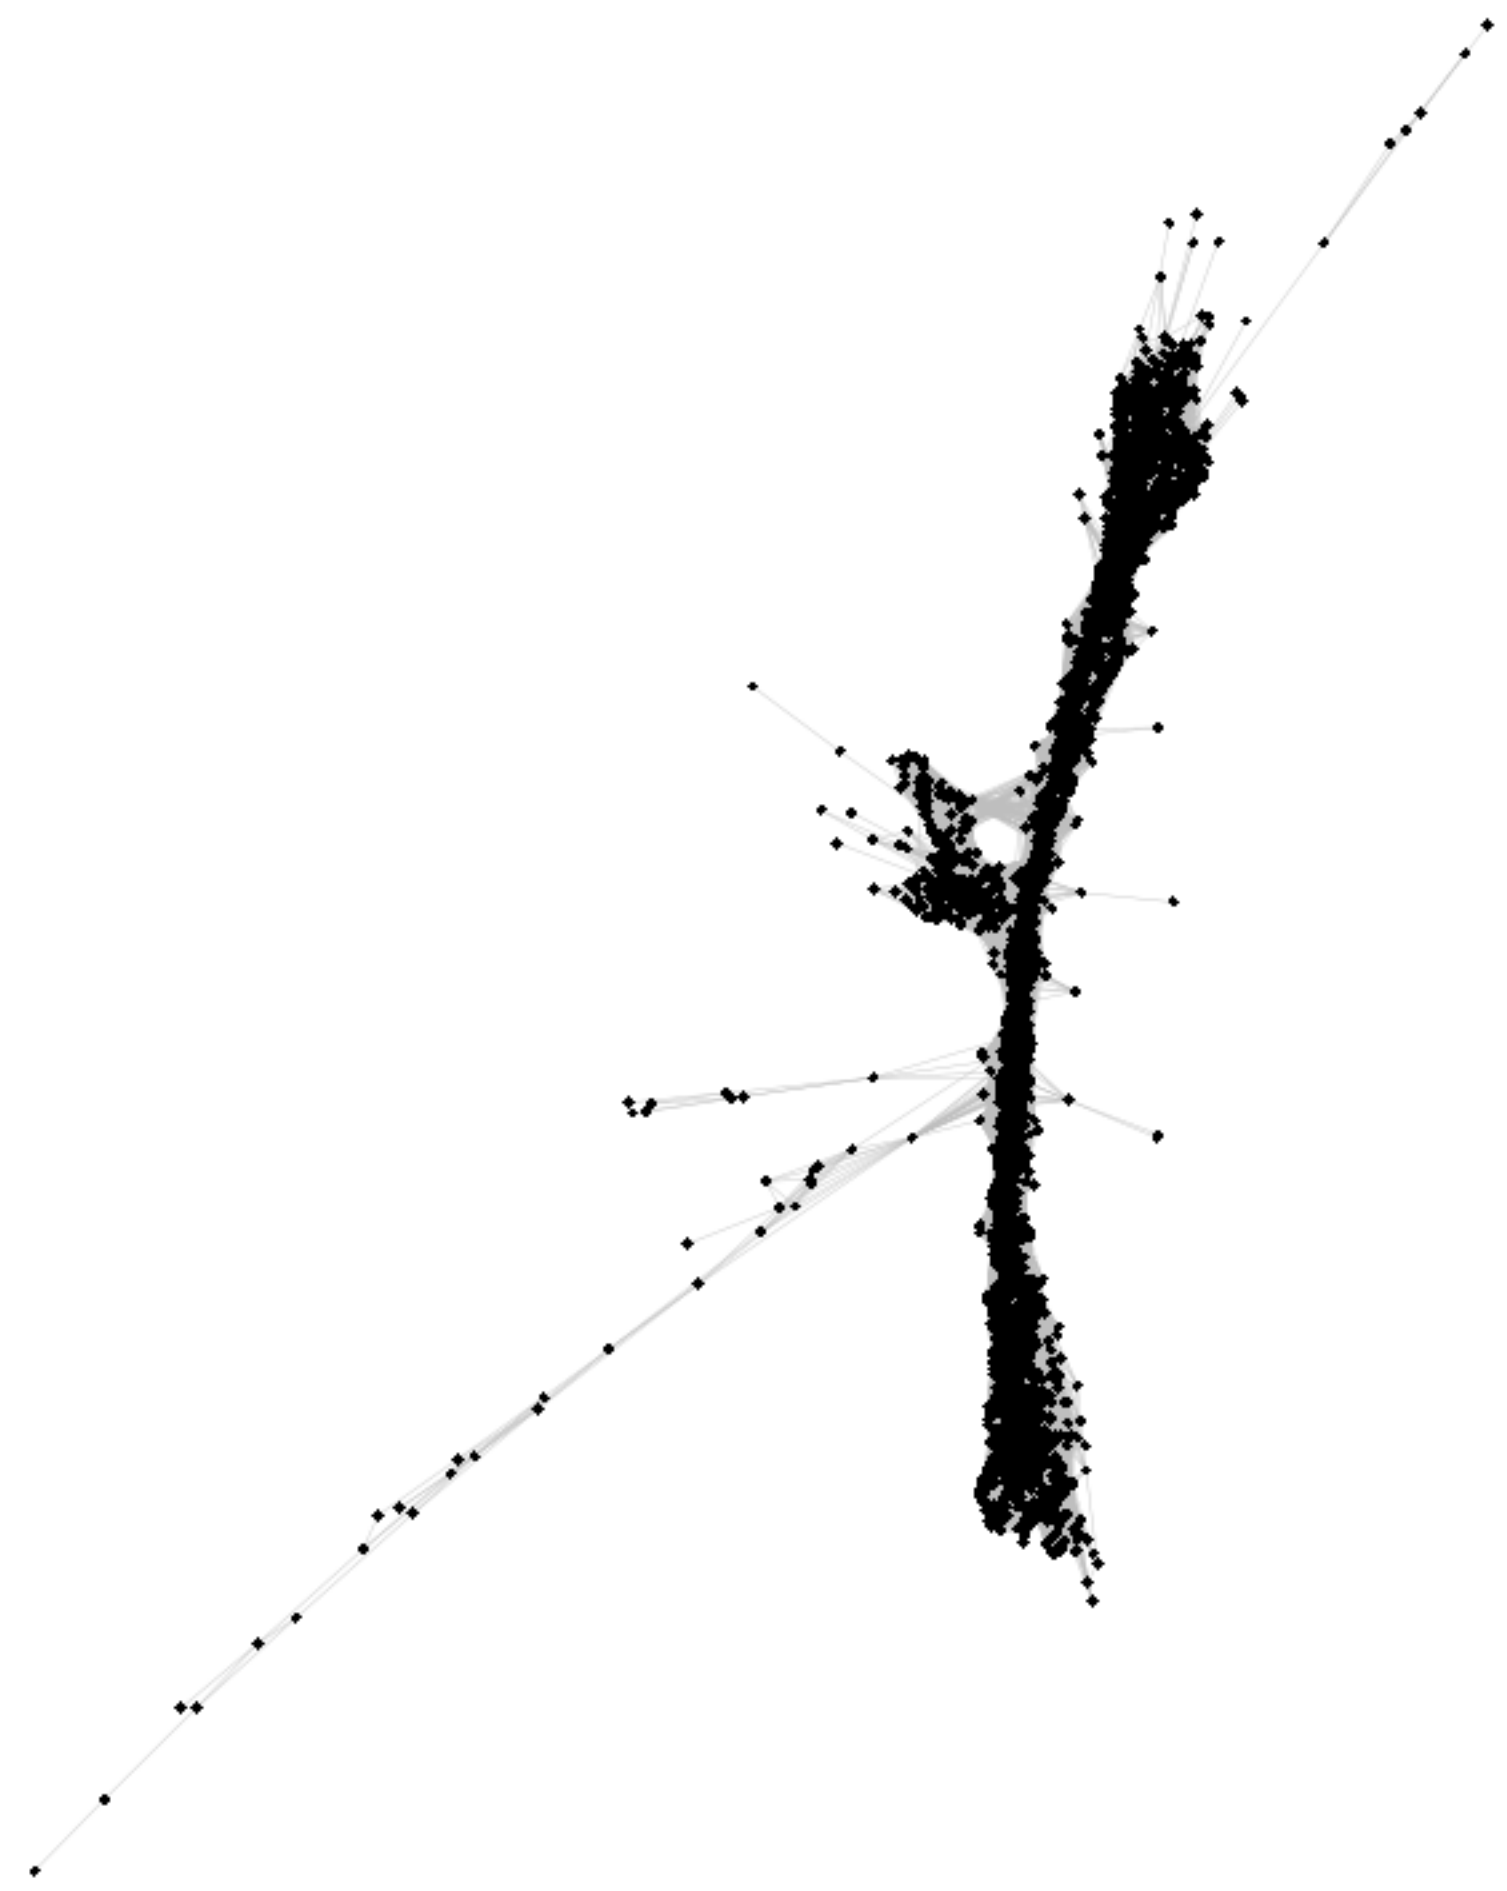

**CL73**

Number of reads: 6322  
Number of pairs: 1426915  
Density: 0.07141  
Diameter: NA  
Mean edge weigth: 165.64  
Max. degree: 825

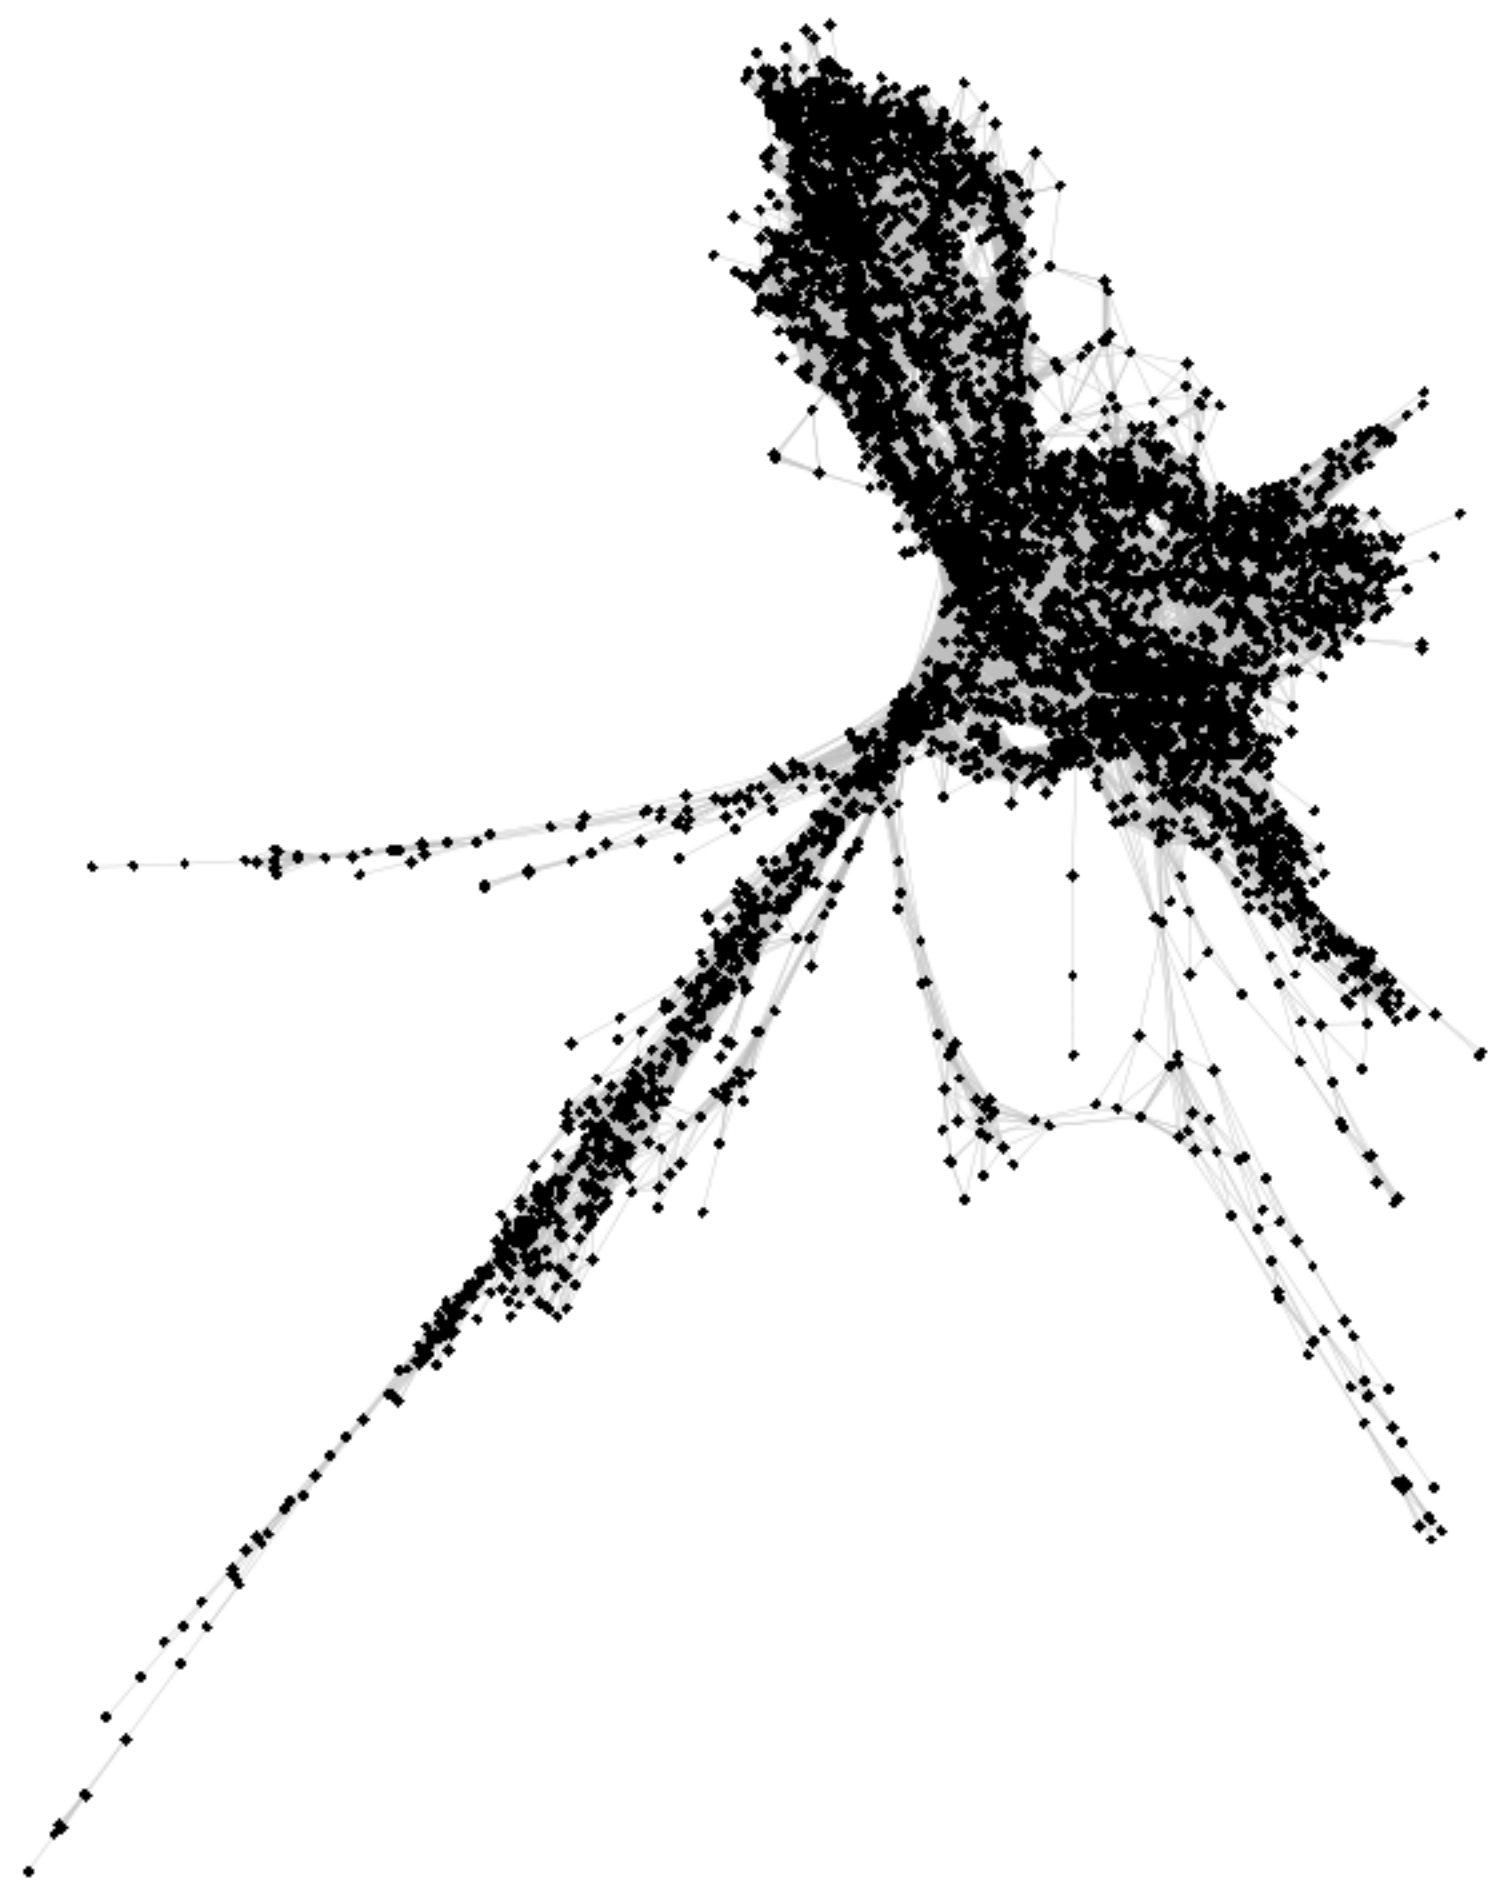

**CL74**

Number of reads: 6314  
Number of pairs: 204852  
Density: 0.01028  
Diameter: NA  
Mean edge weigth: 150.76  
Max. degree: 274

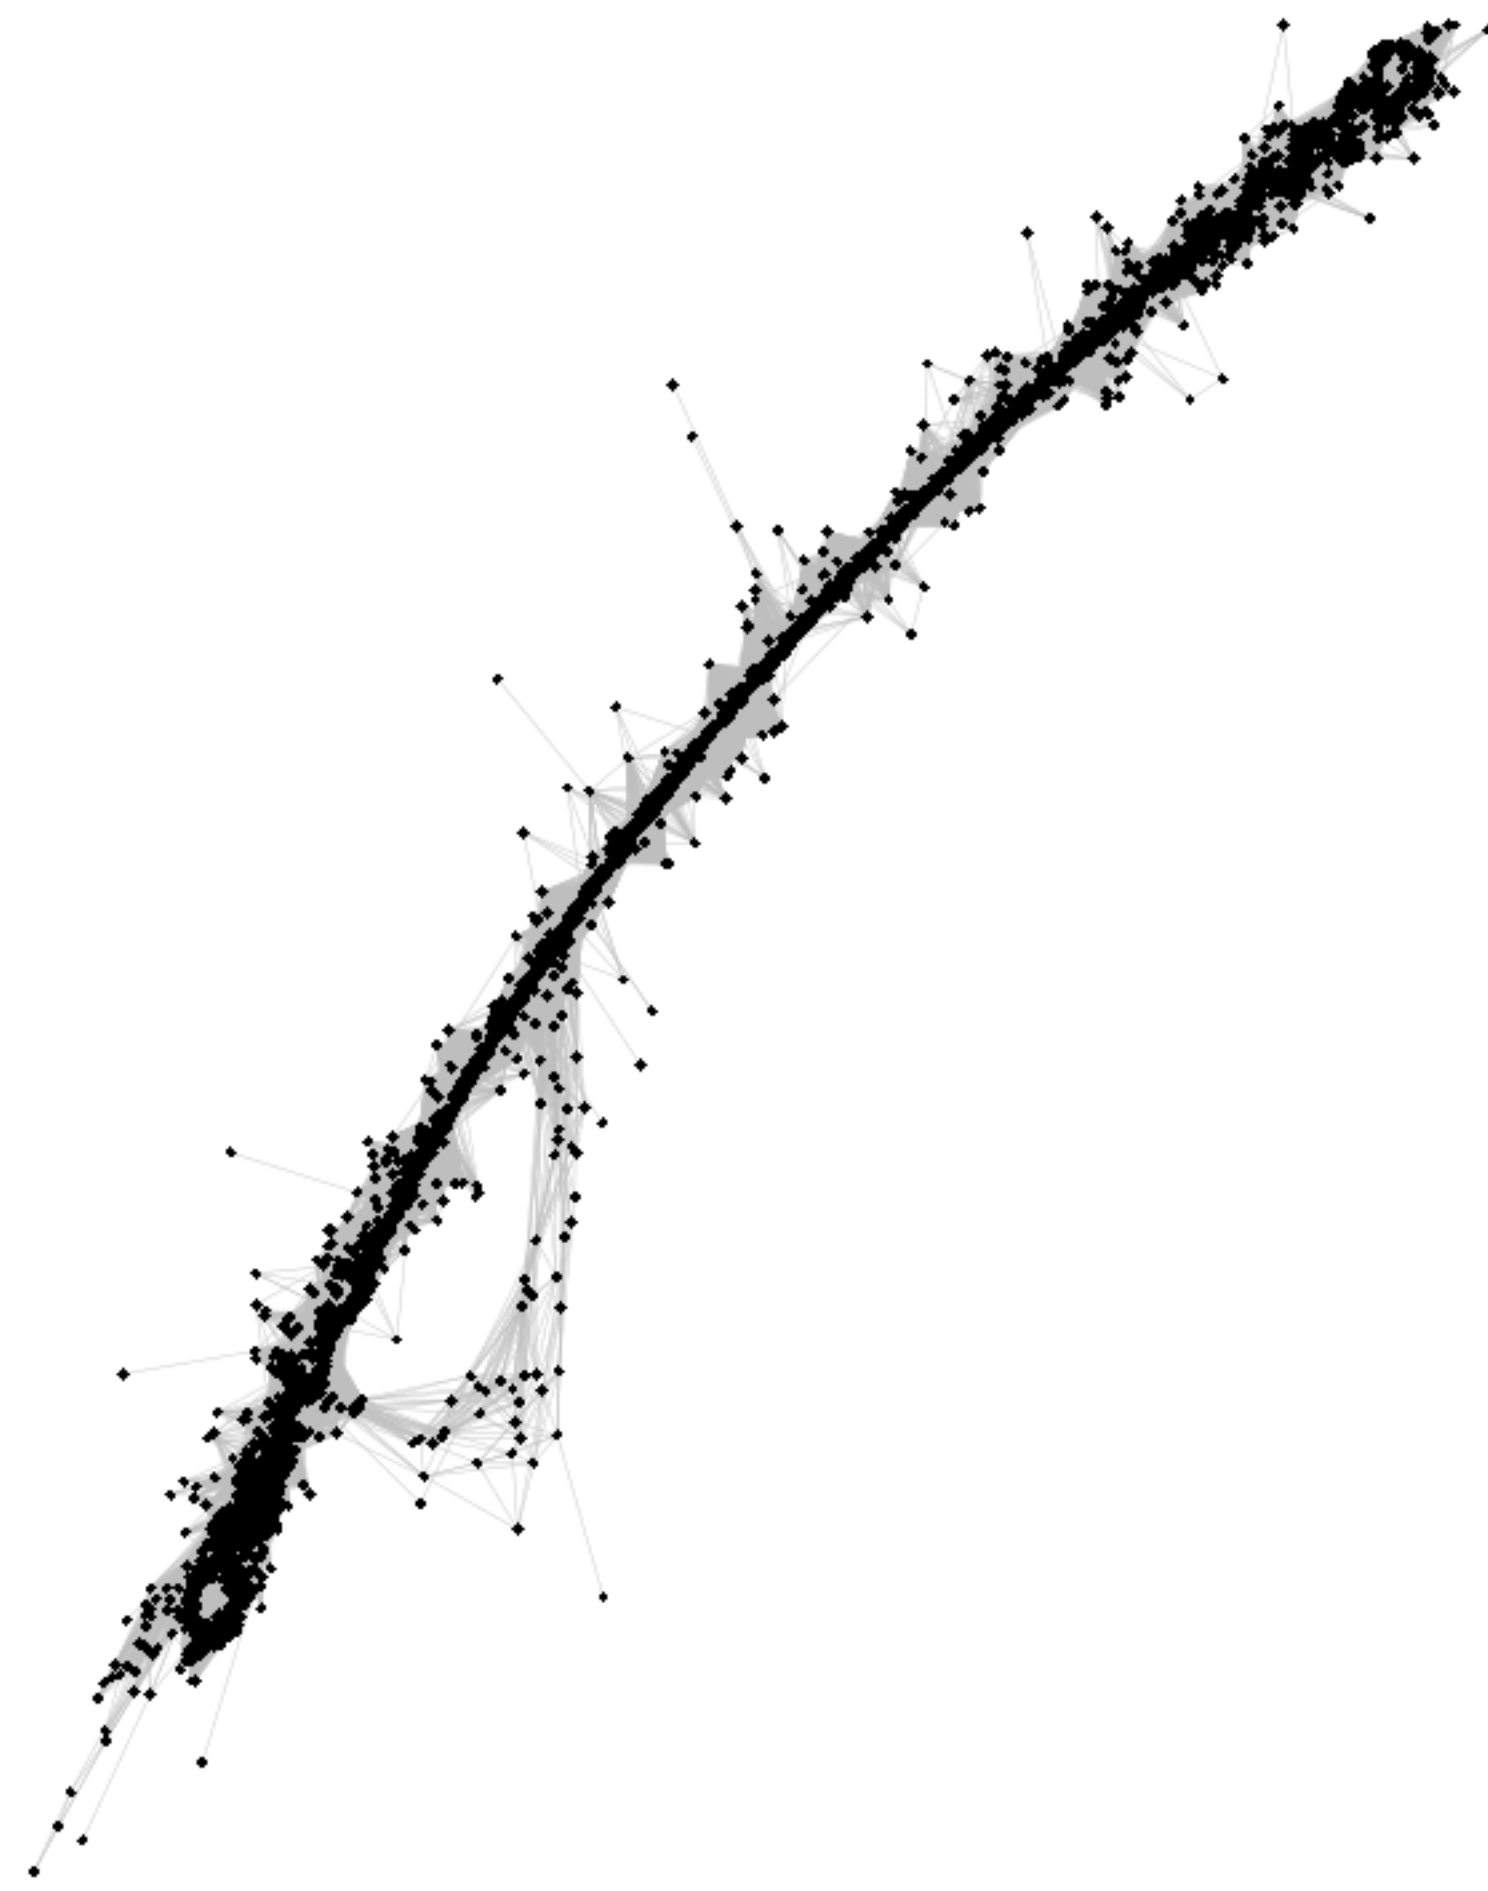

**CL75**

Number of reads: 6273  
Number of pairs: 1443511  
Density: 0.07338  
Diameter: NA  
Mean edge weigth: 168.13  
Max. degree: 640

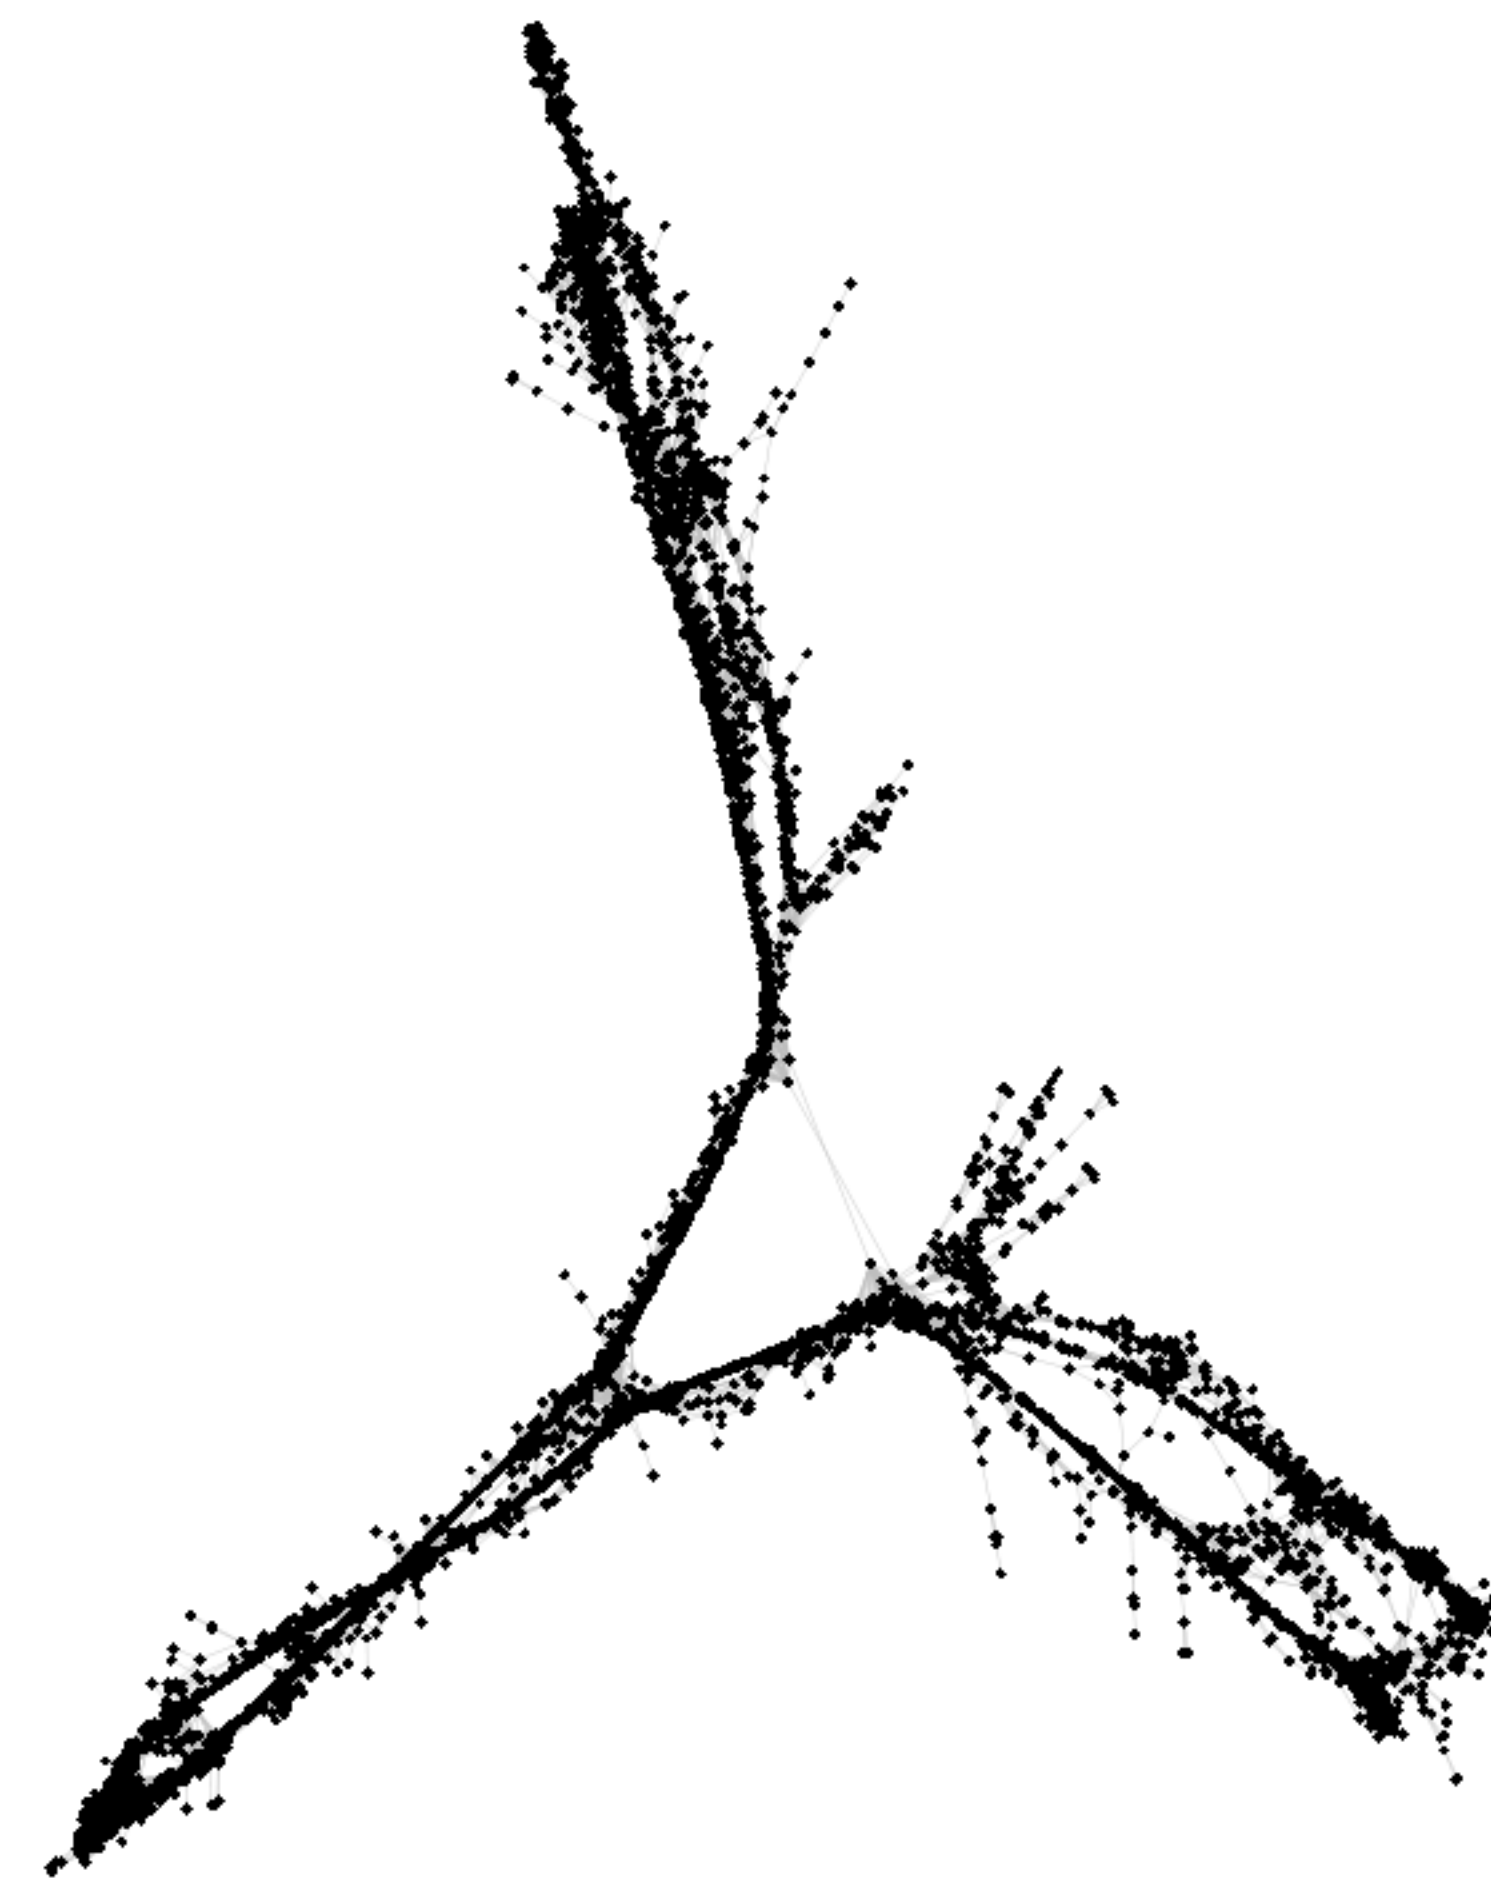

**CL76**

Number of reads: 6188  
Number of pairs: 149922  
Density: 0.007832  
Diameter: NA  
Mean edge weigth: 166.8  
Max. degree: 168

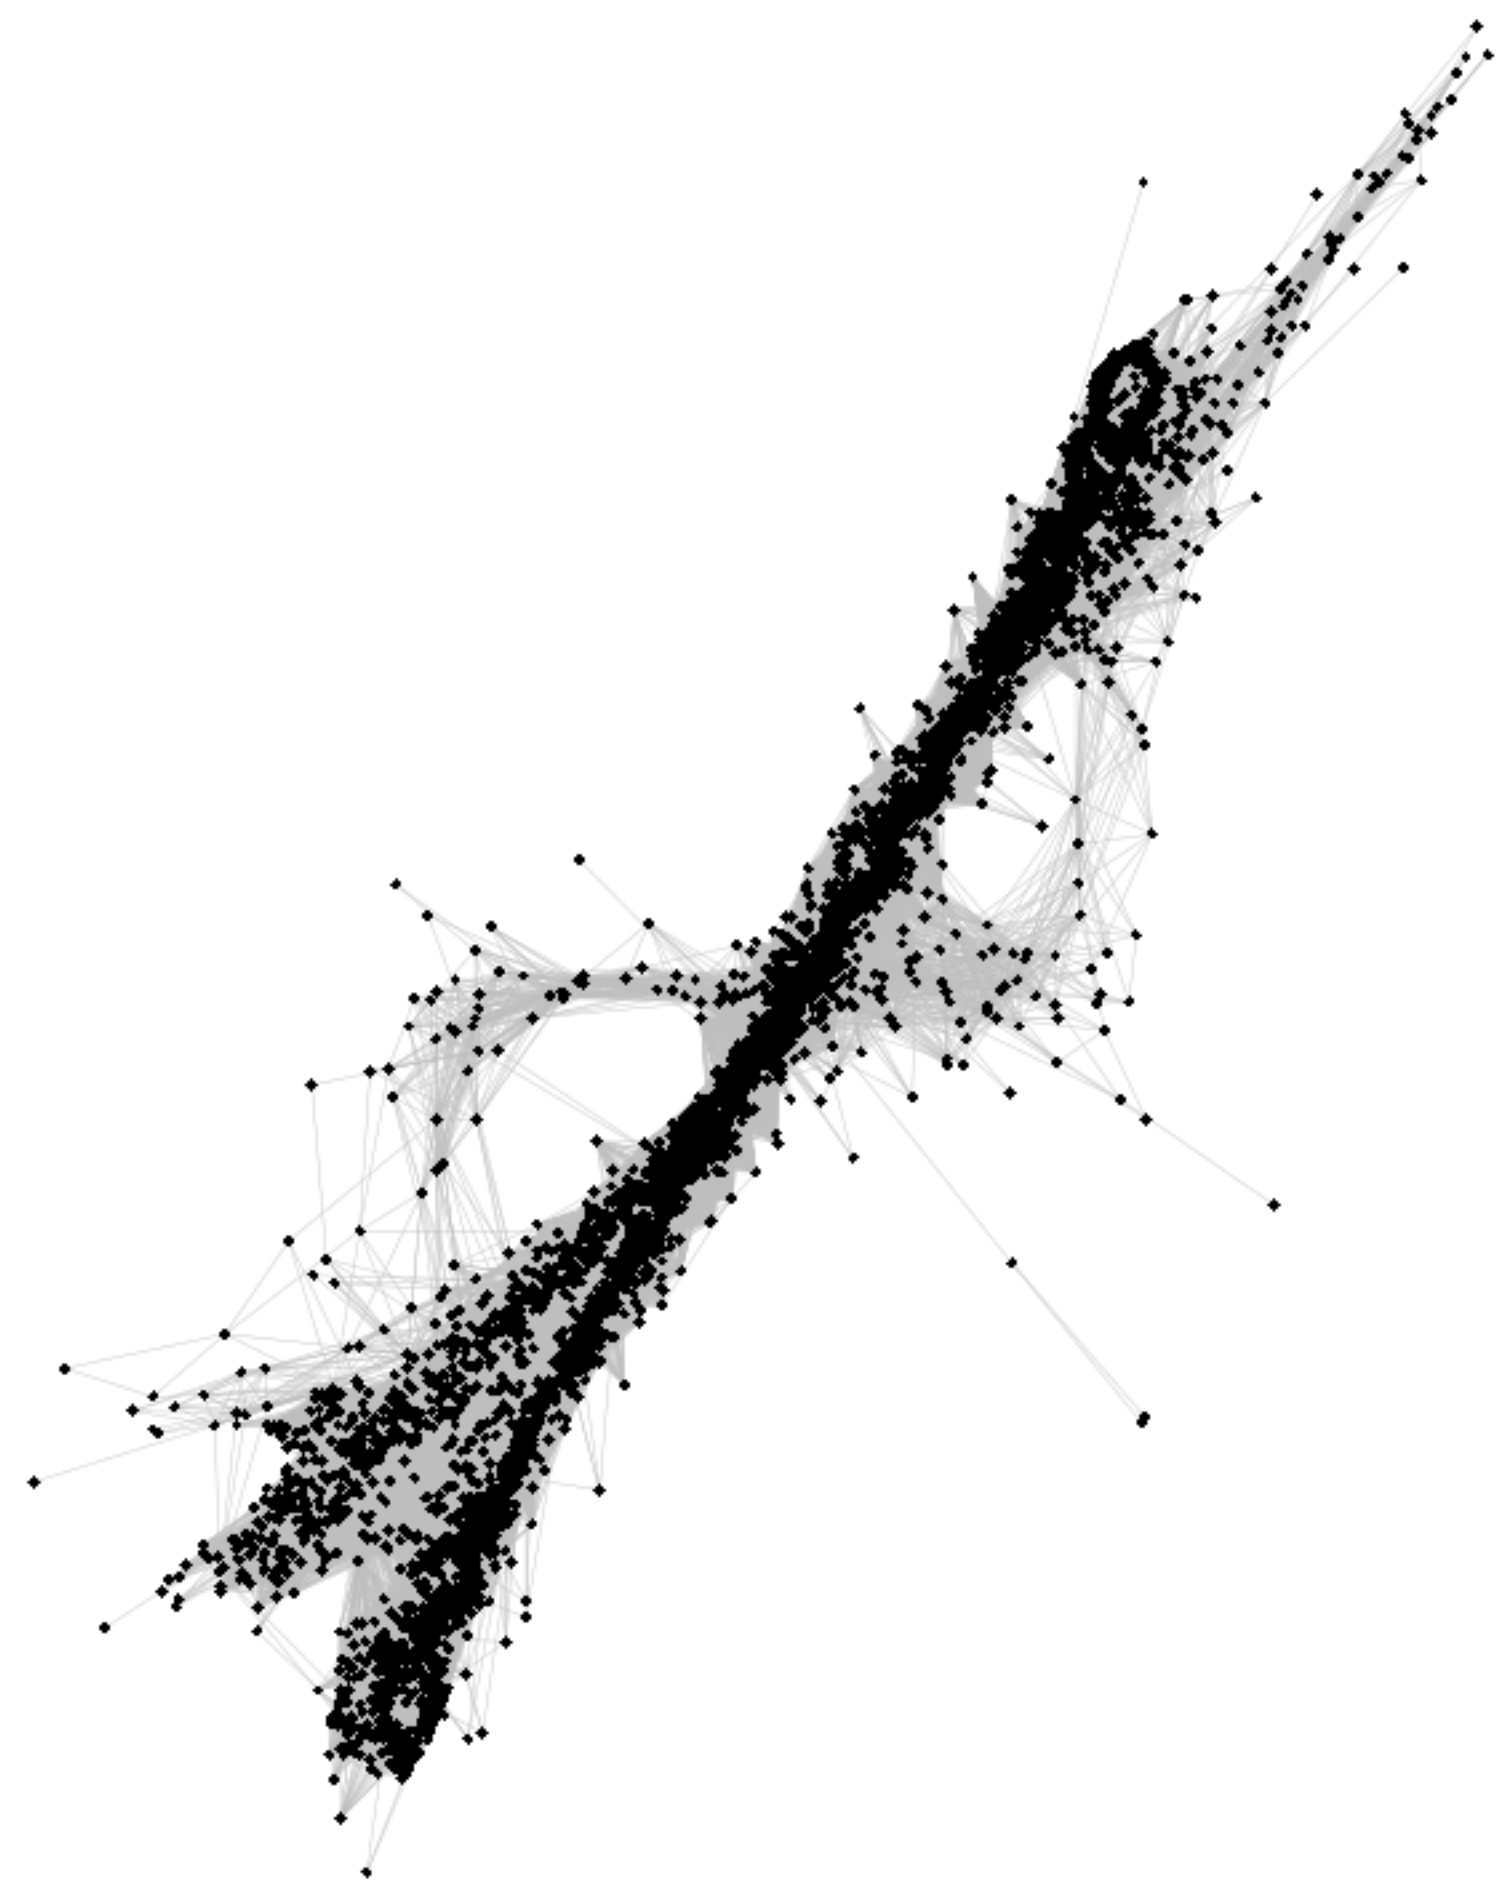

**CL77**

Number of reads: 6096  
Number of pairs: 1512580  
Density: 0.08142  
Diameter: NA  
Mean edge weigth: 164.31  
Max. degree: 963

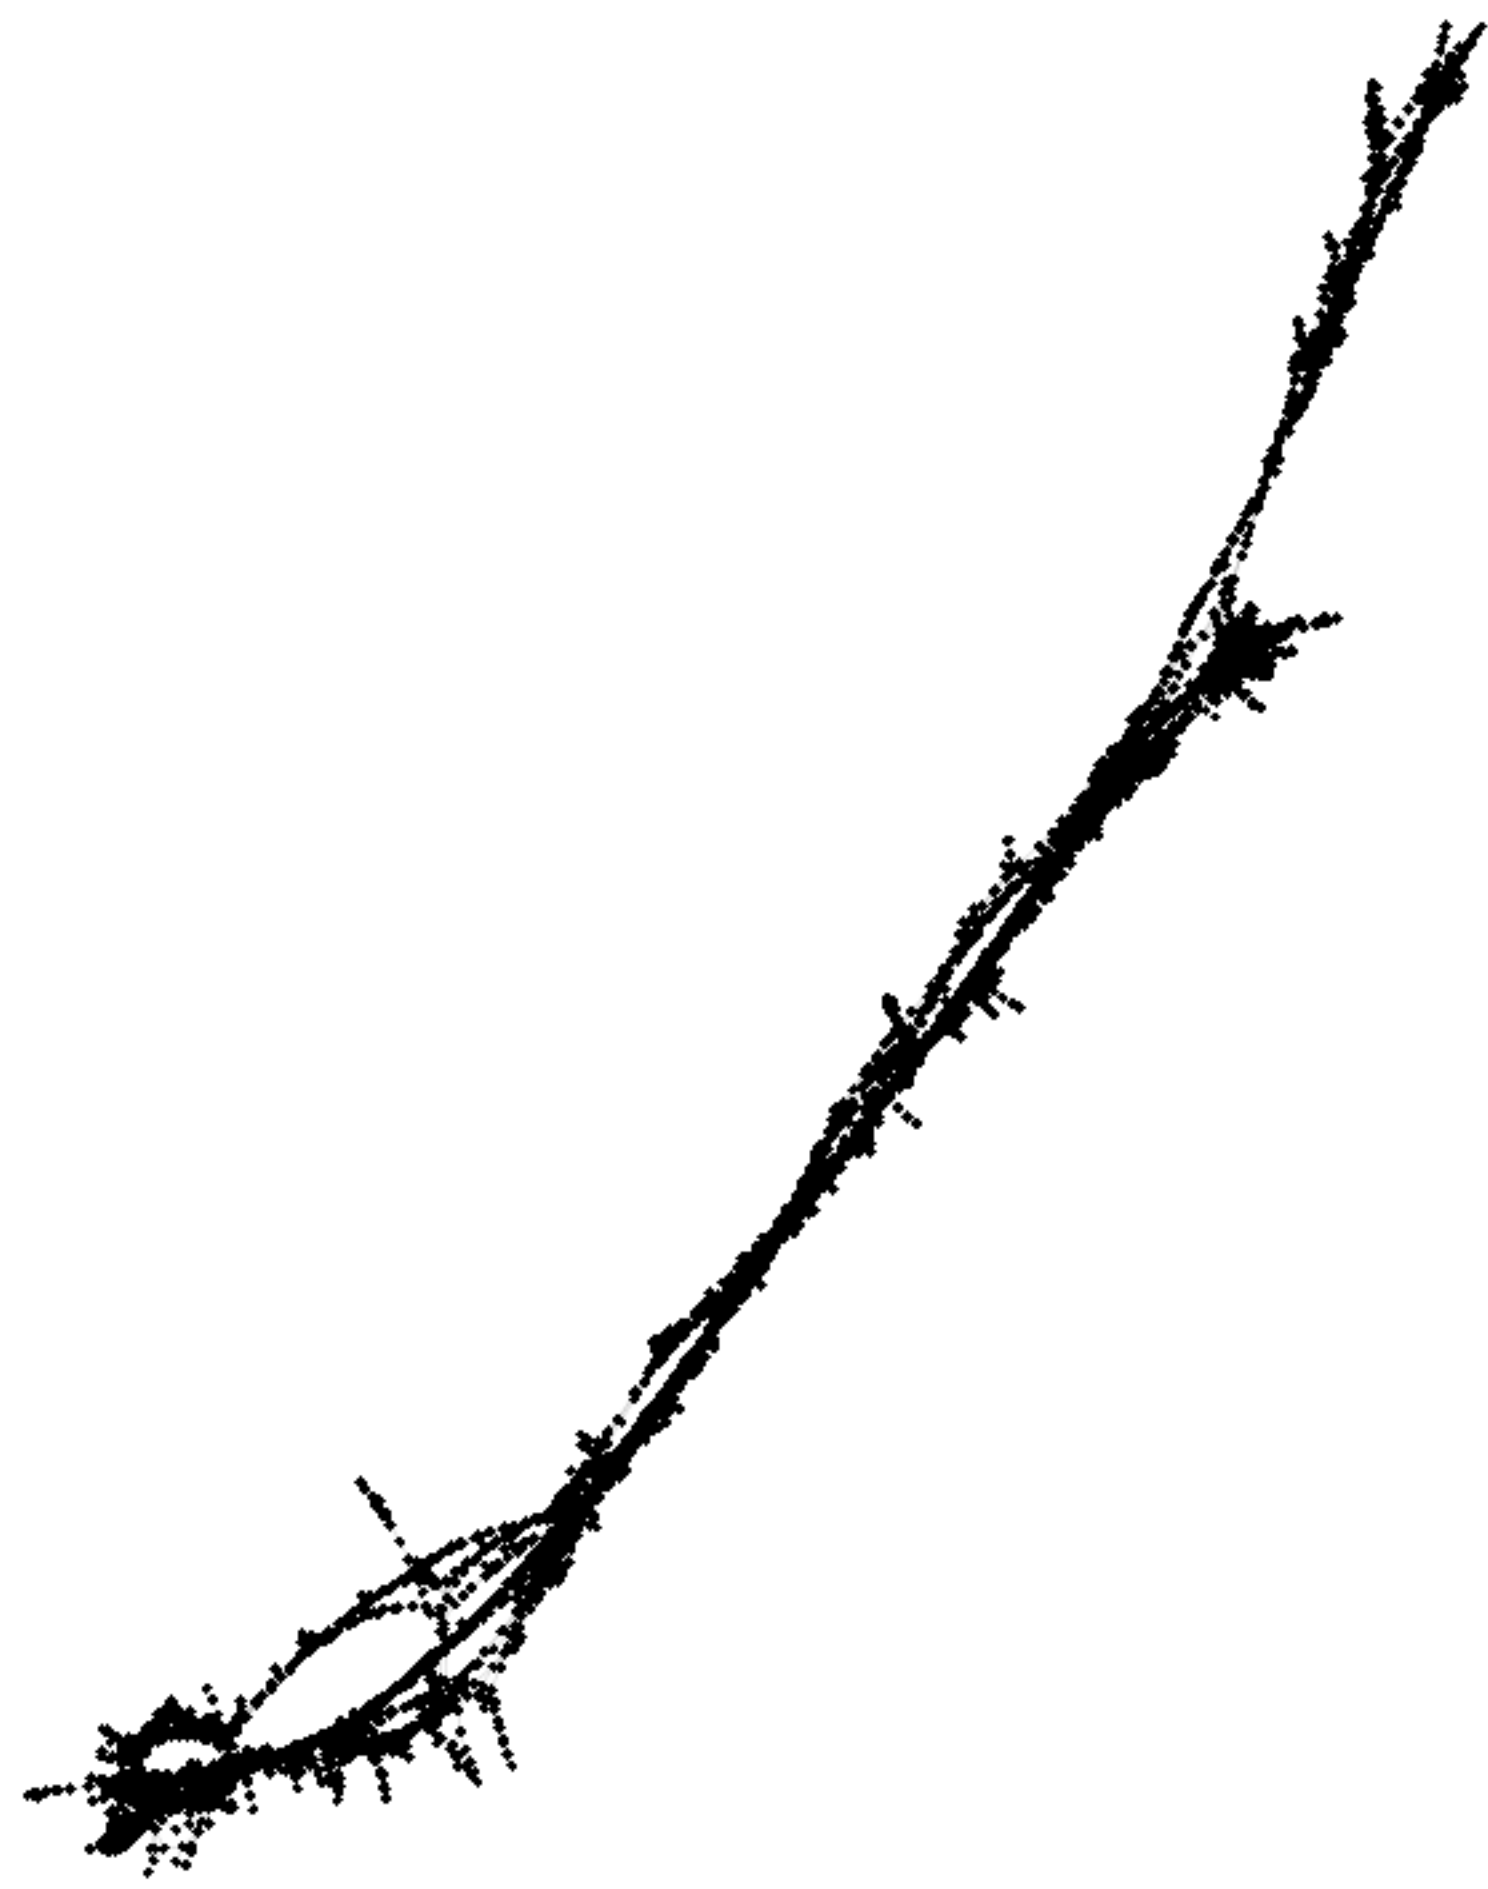

**CL78**

Number of reads: 5991  
Number of pairs: 60031  
Density: 0.003346  
Diameter: NA  
Mean edge weigth: 157.34  
Max. degree: 94

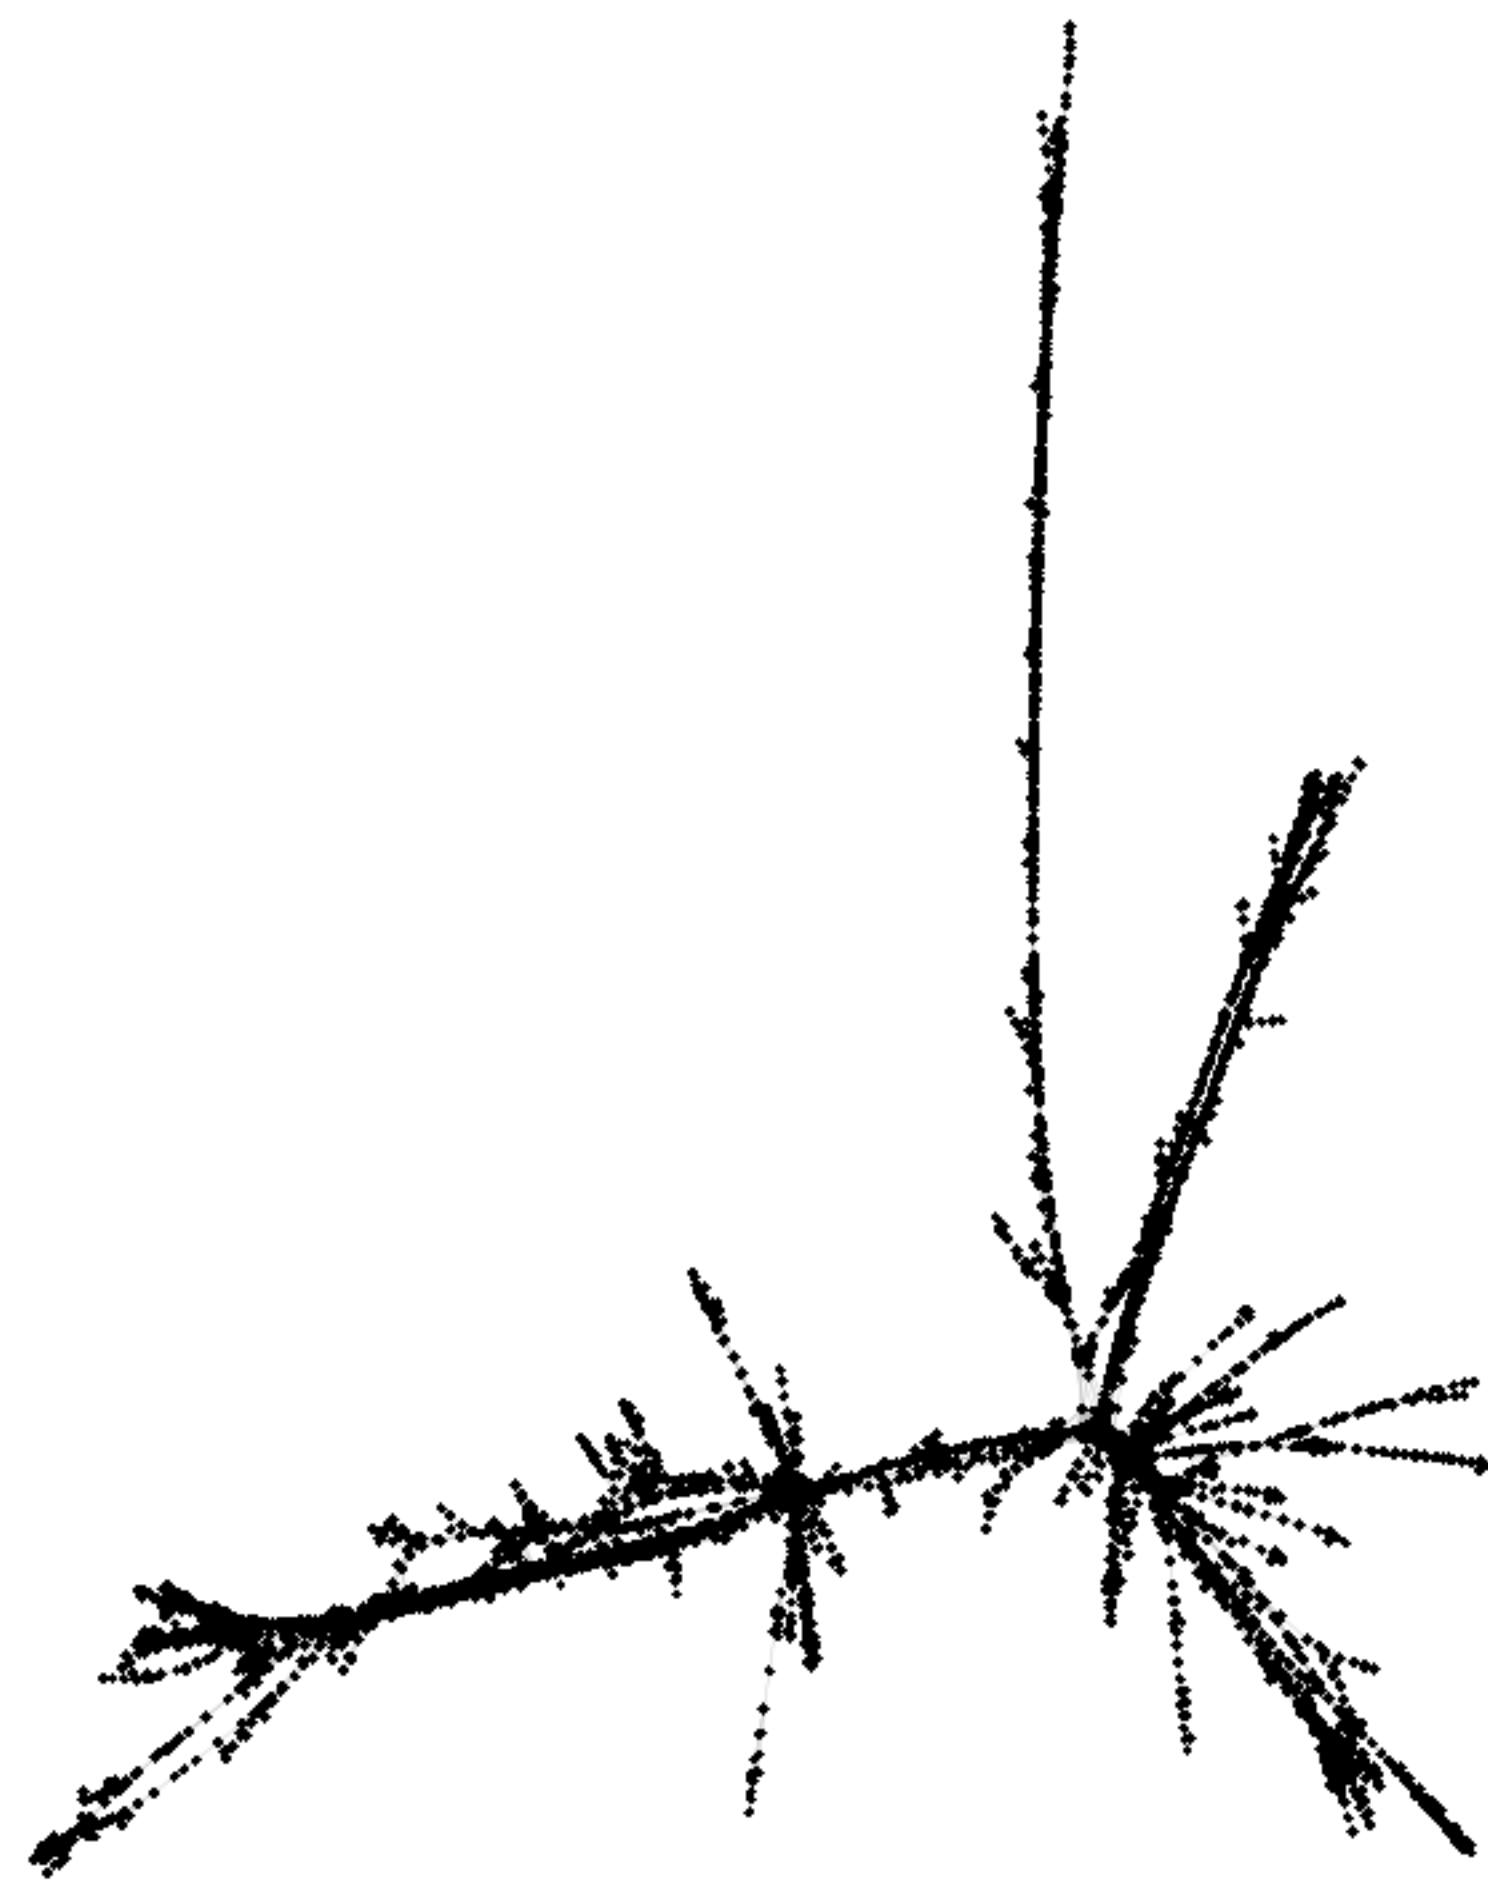

**CL79**

Number of reads: 5962  
Number of pairs: 70563  
Density: 0.003971  
Diameter: NA  
Mean edge weigth: 166.87  
Max. degree: 128

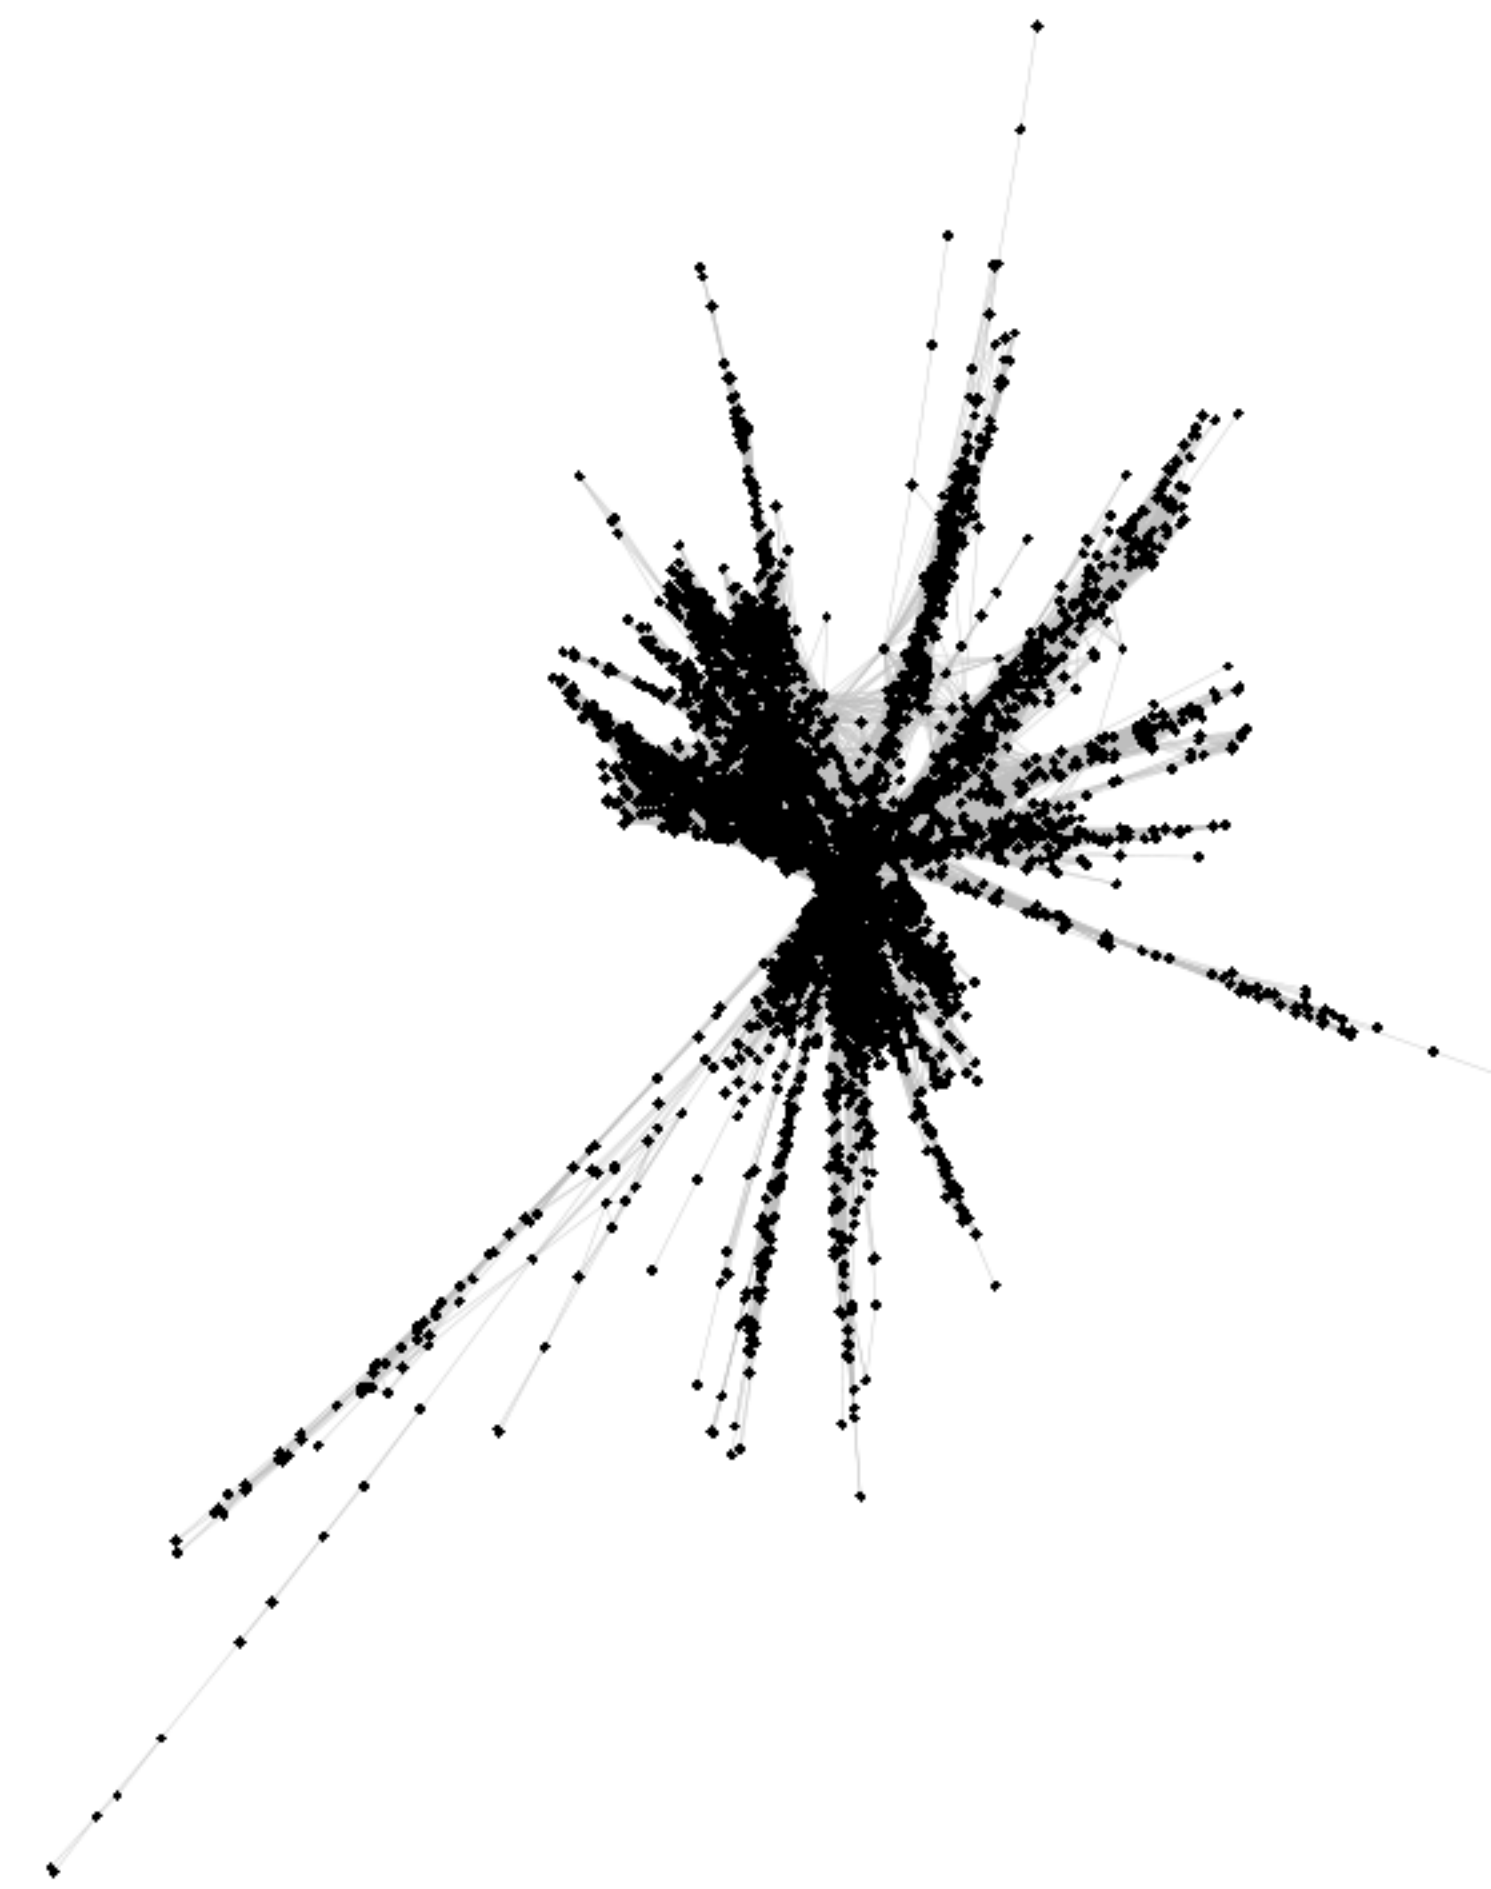

**CL80**

Number of reads: 5947  
Number of pairs: 698182  
Density: 0.03949  
Diameter: NA  
Mean edge weigth: 153.86  
Max. degree: 1159

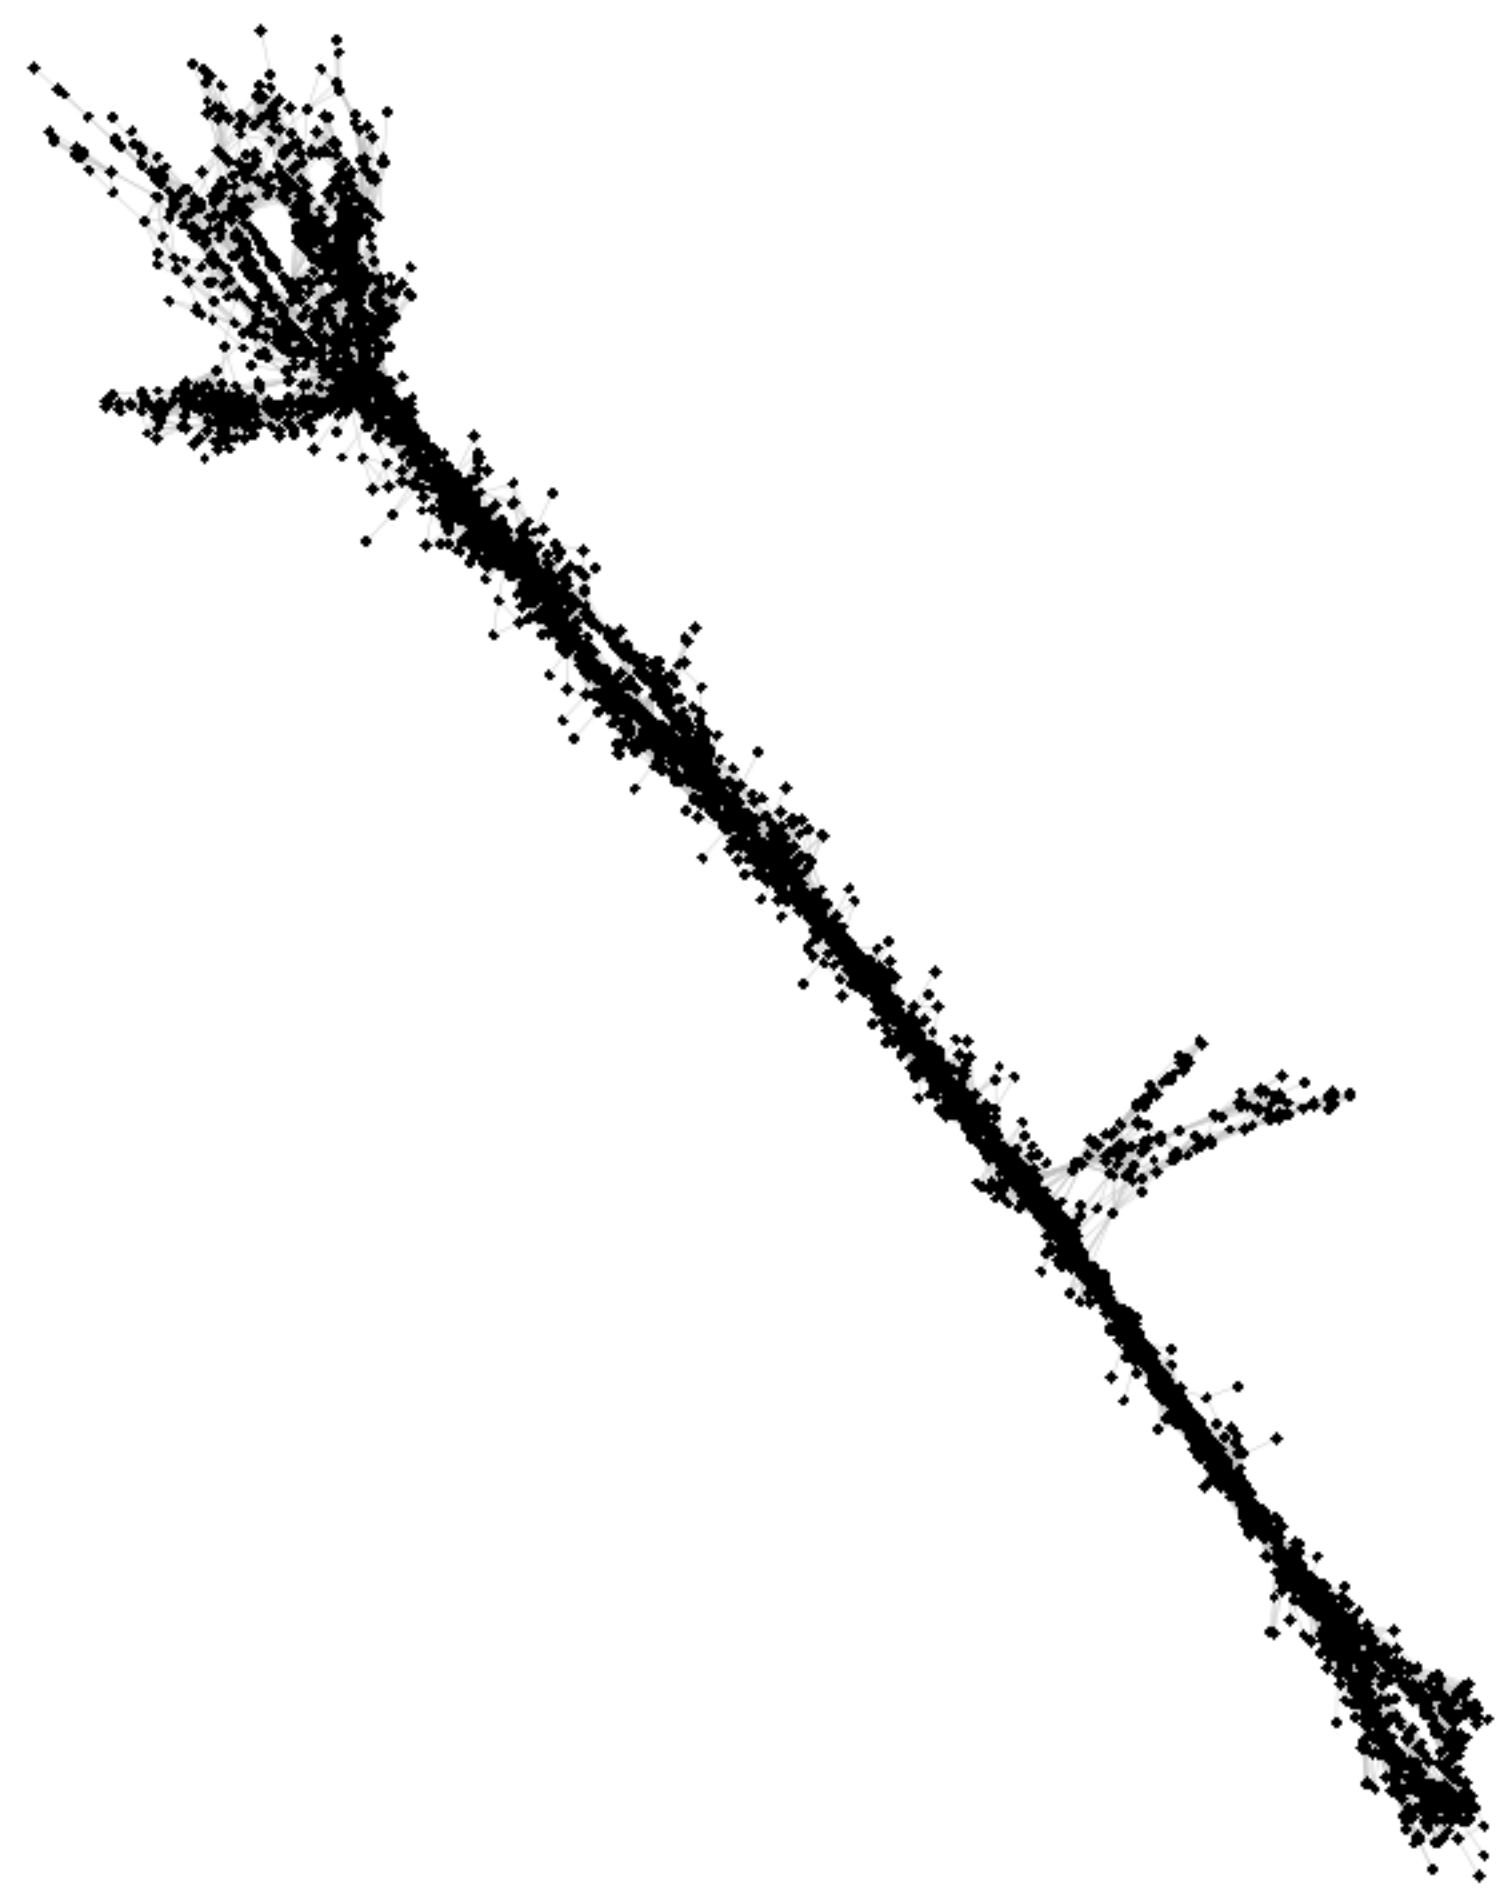

**CL81**

Number of reads: 5918  
Number of pairs: 168353  
Density: 0.009616  
Diameter: NA  
Mean edge weigth: 151.54  
Max. degree: 234

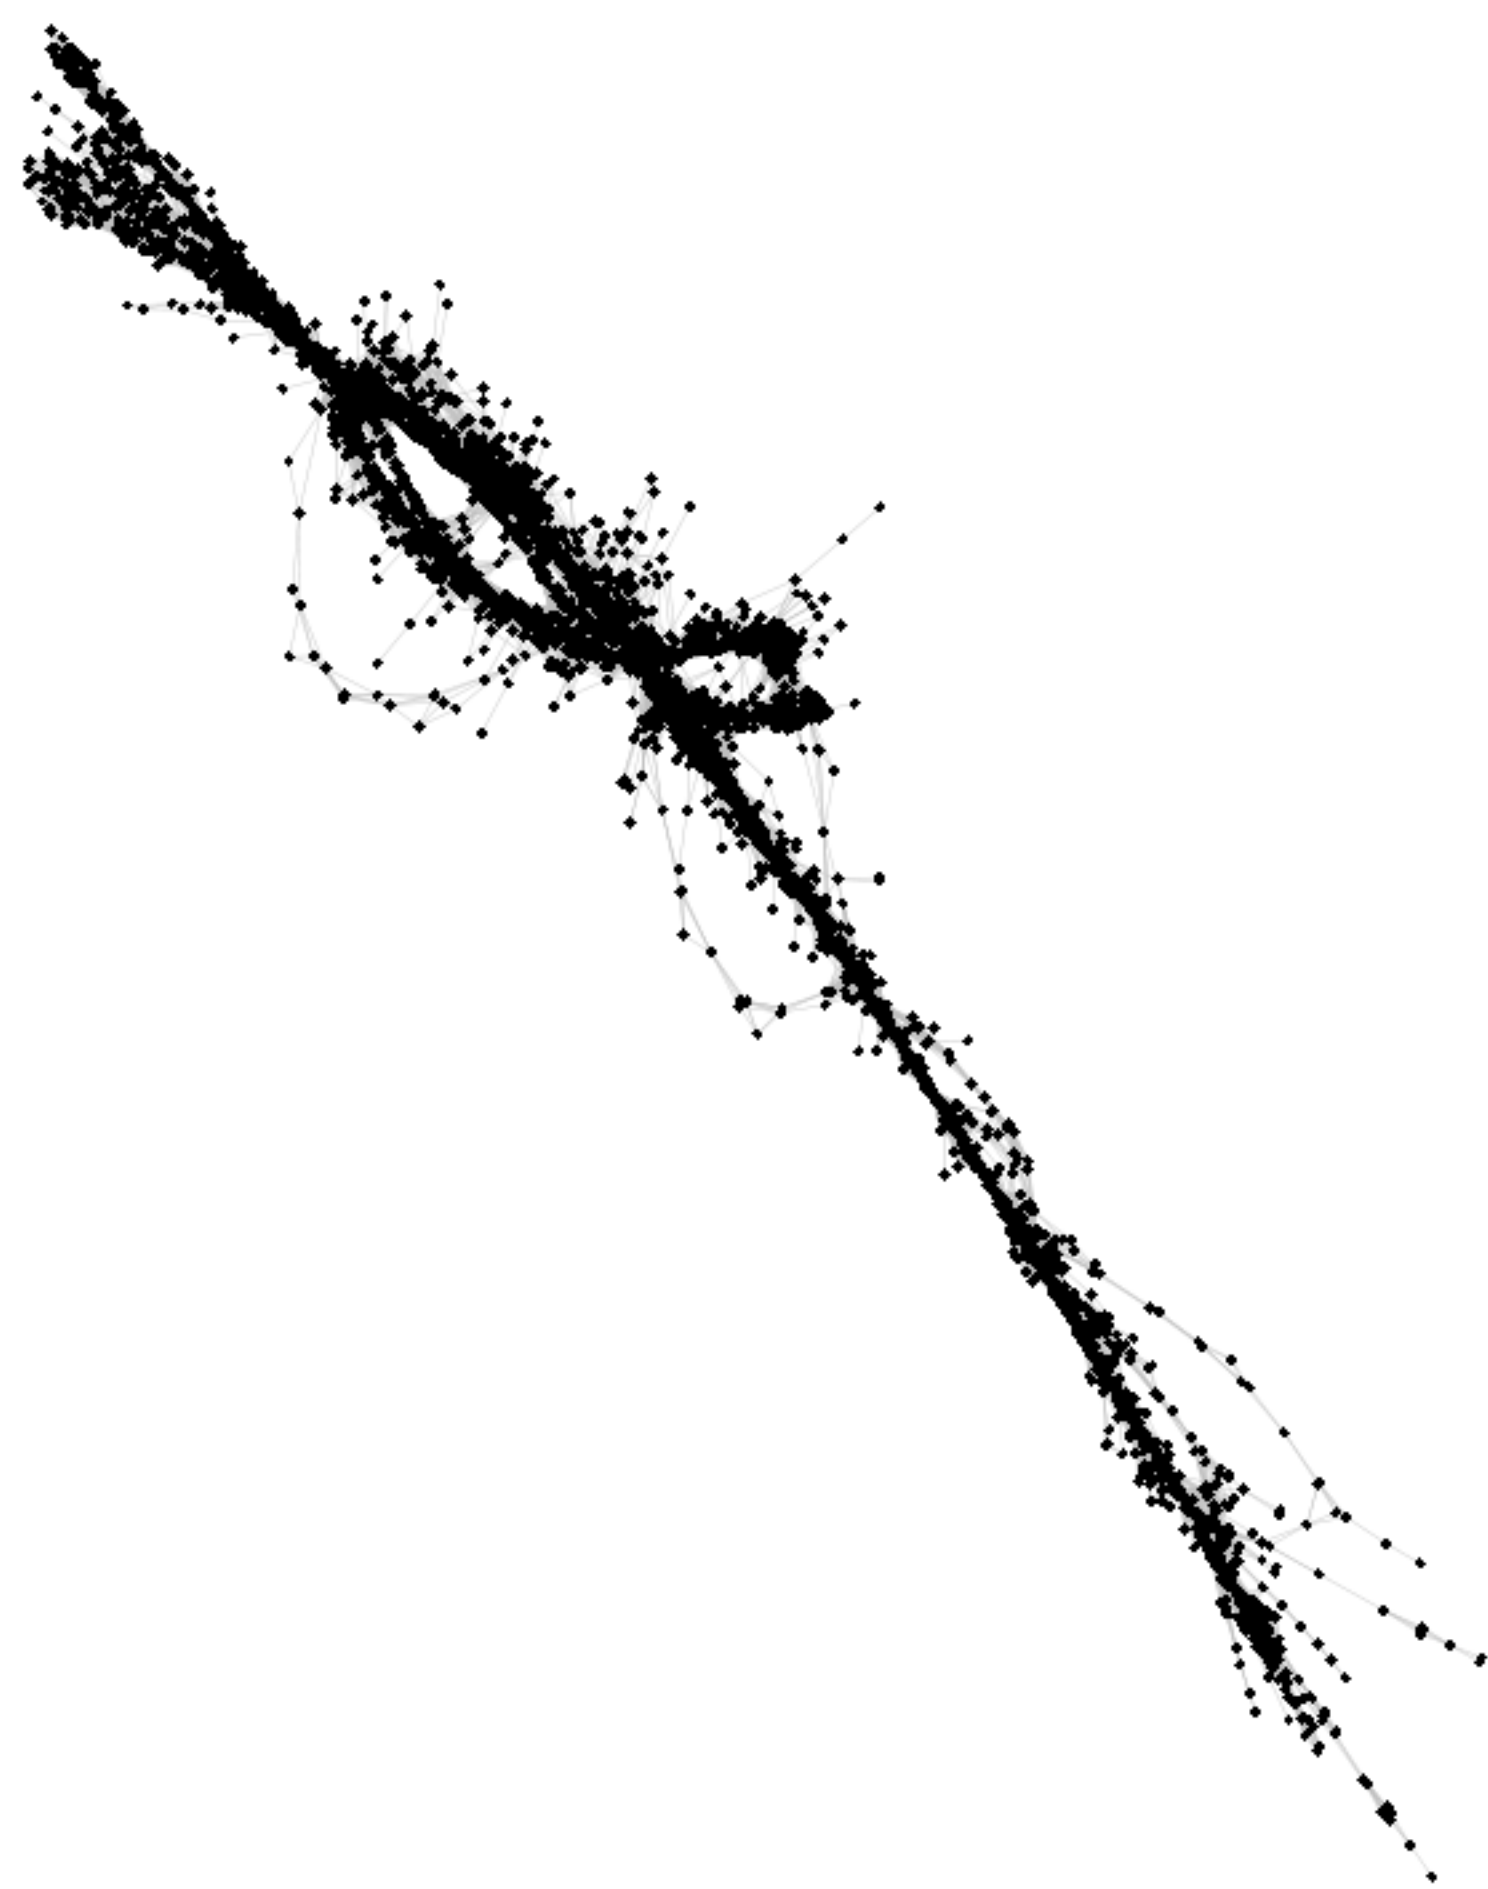

**CL82**

Number of reads: 5908  
Number of pairs: 263881  
Density: 0.01512  
Diameter: NA  
Mean edge weigth: 157.64  
Max. degree: 337

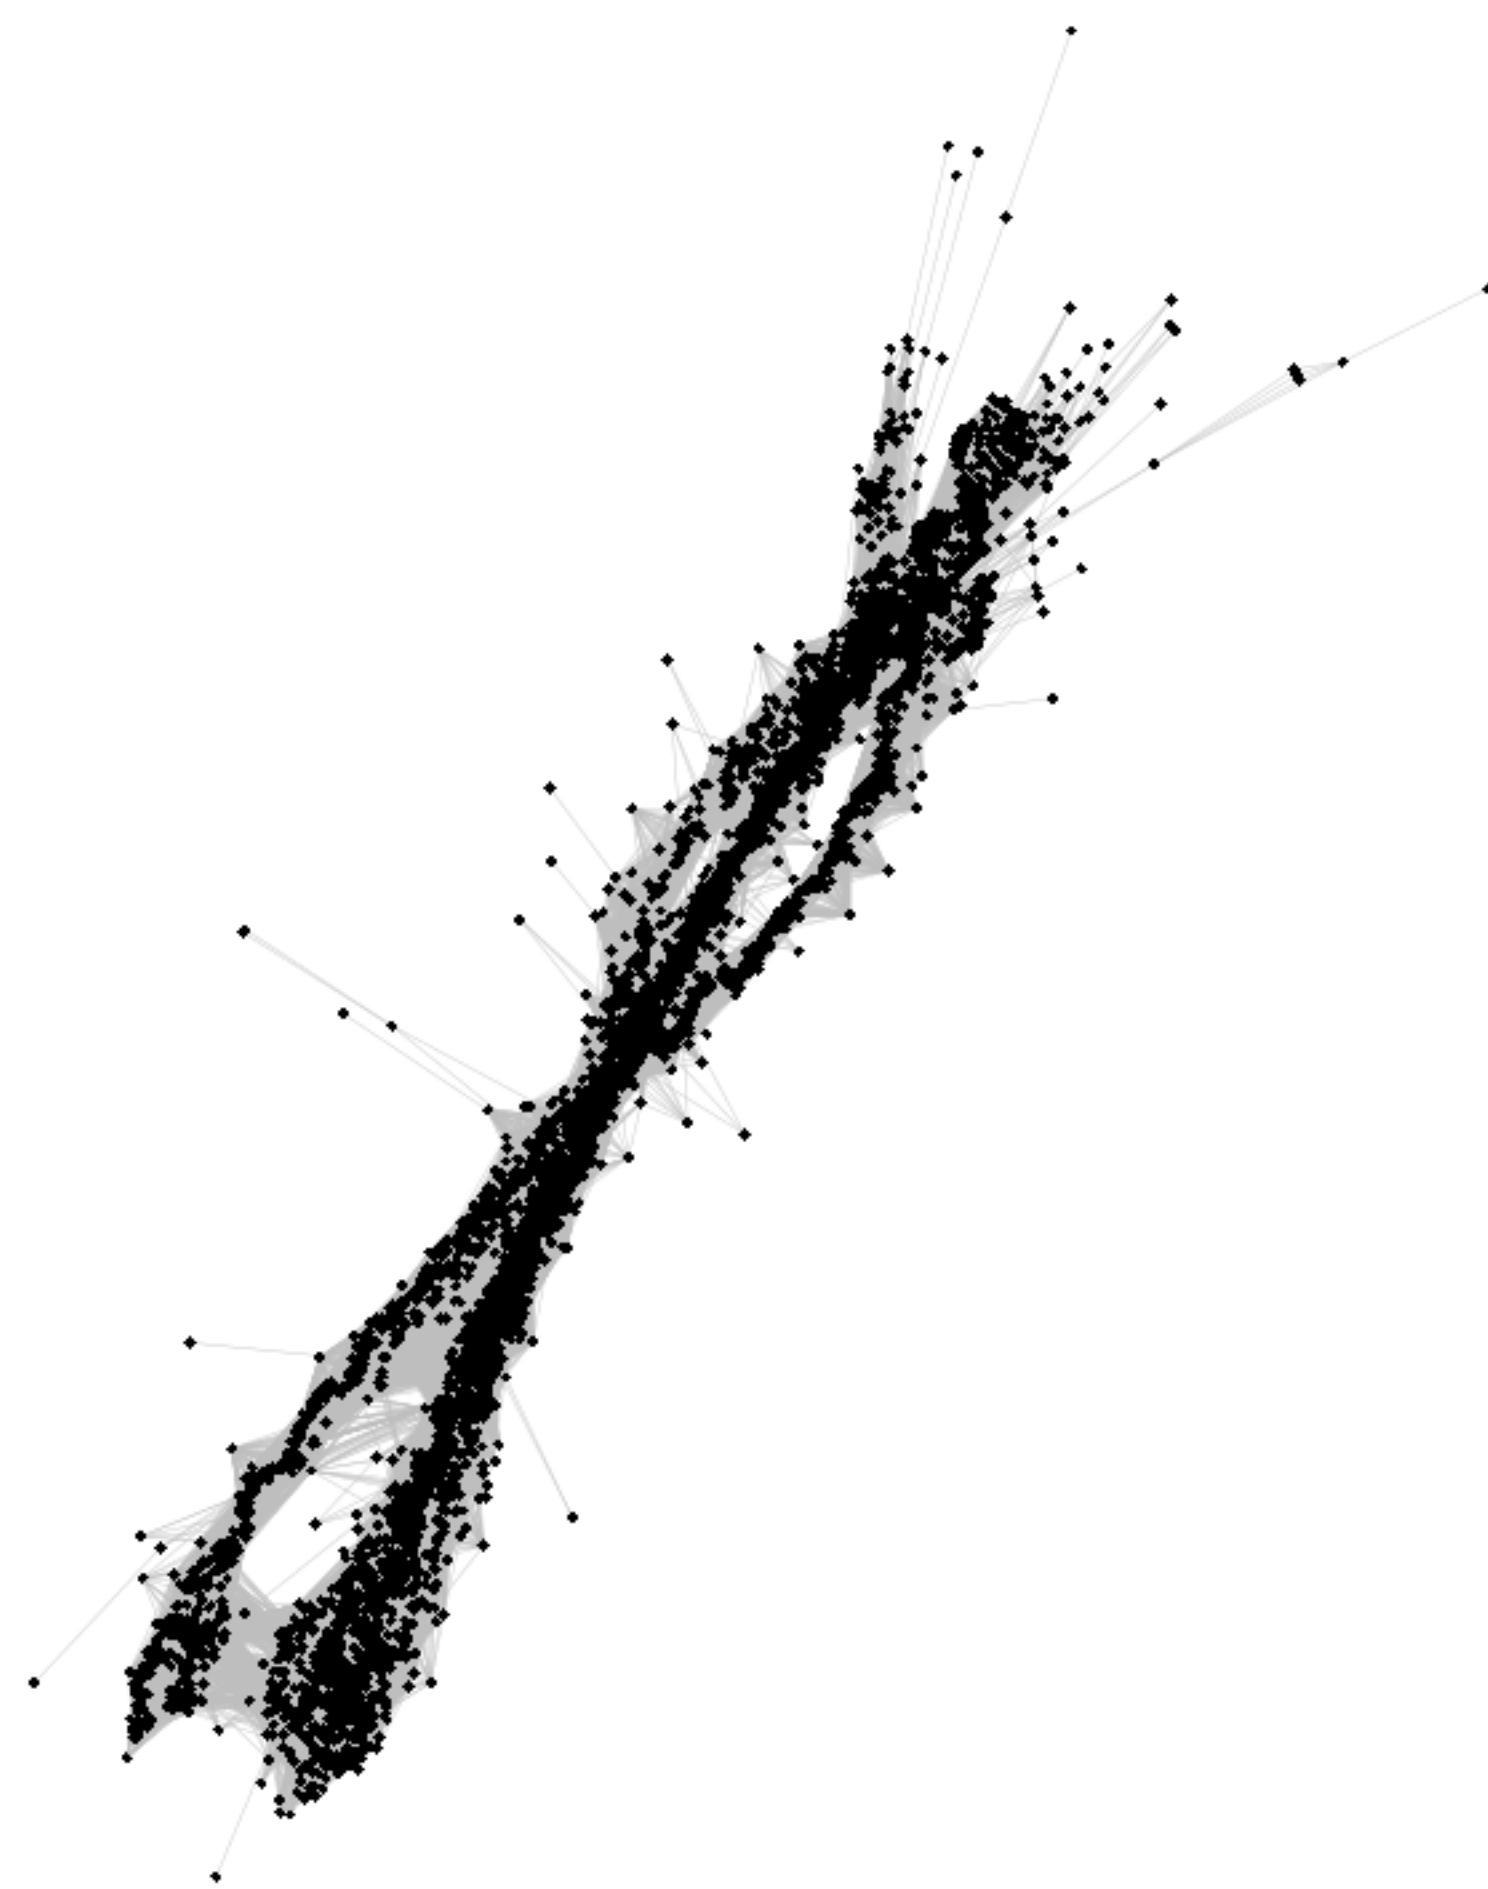

**CL83**

Number of reads: 5694  
Number of pairs: 975254  
Density: 0.06017  
Diameter: NA  
Mean edge weigth: 163.72  
Max. degree: 815

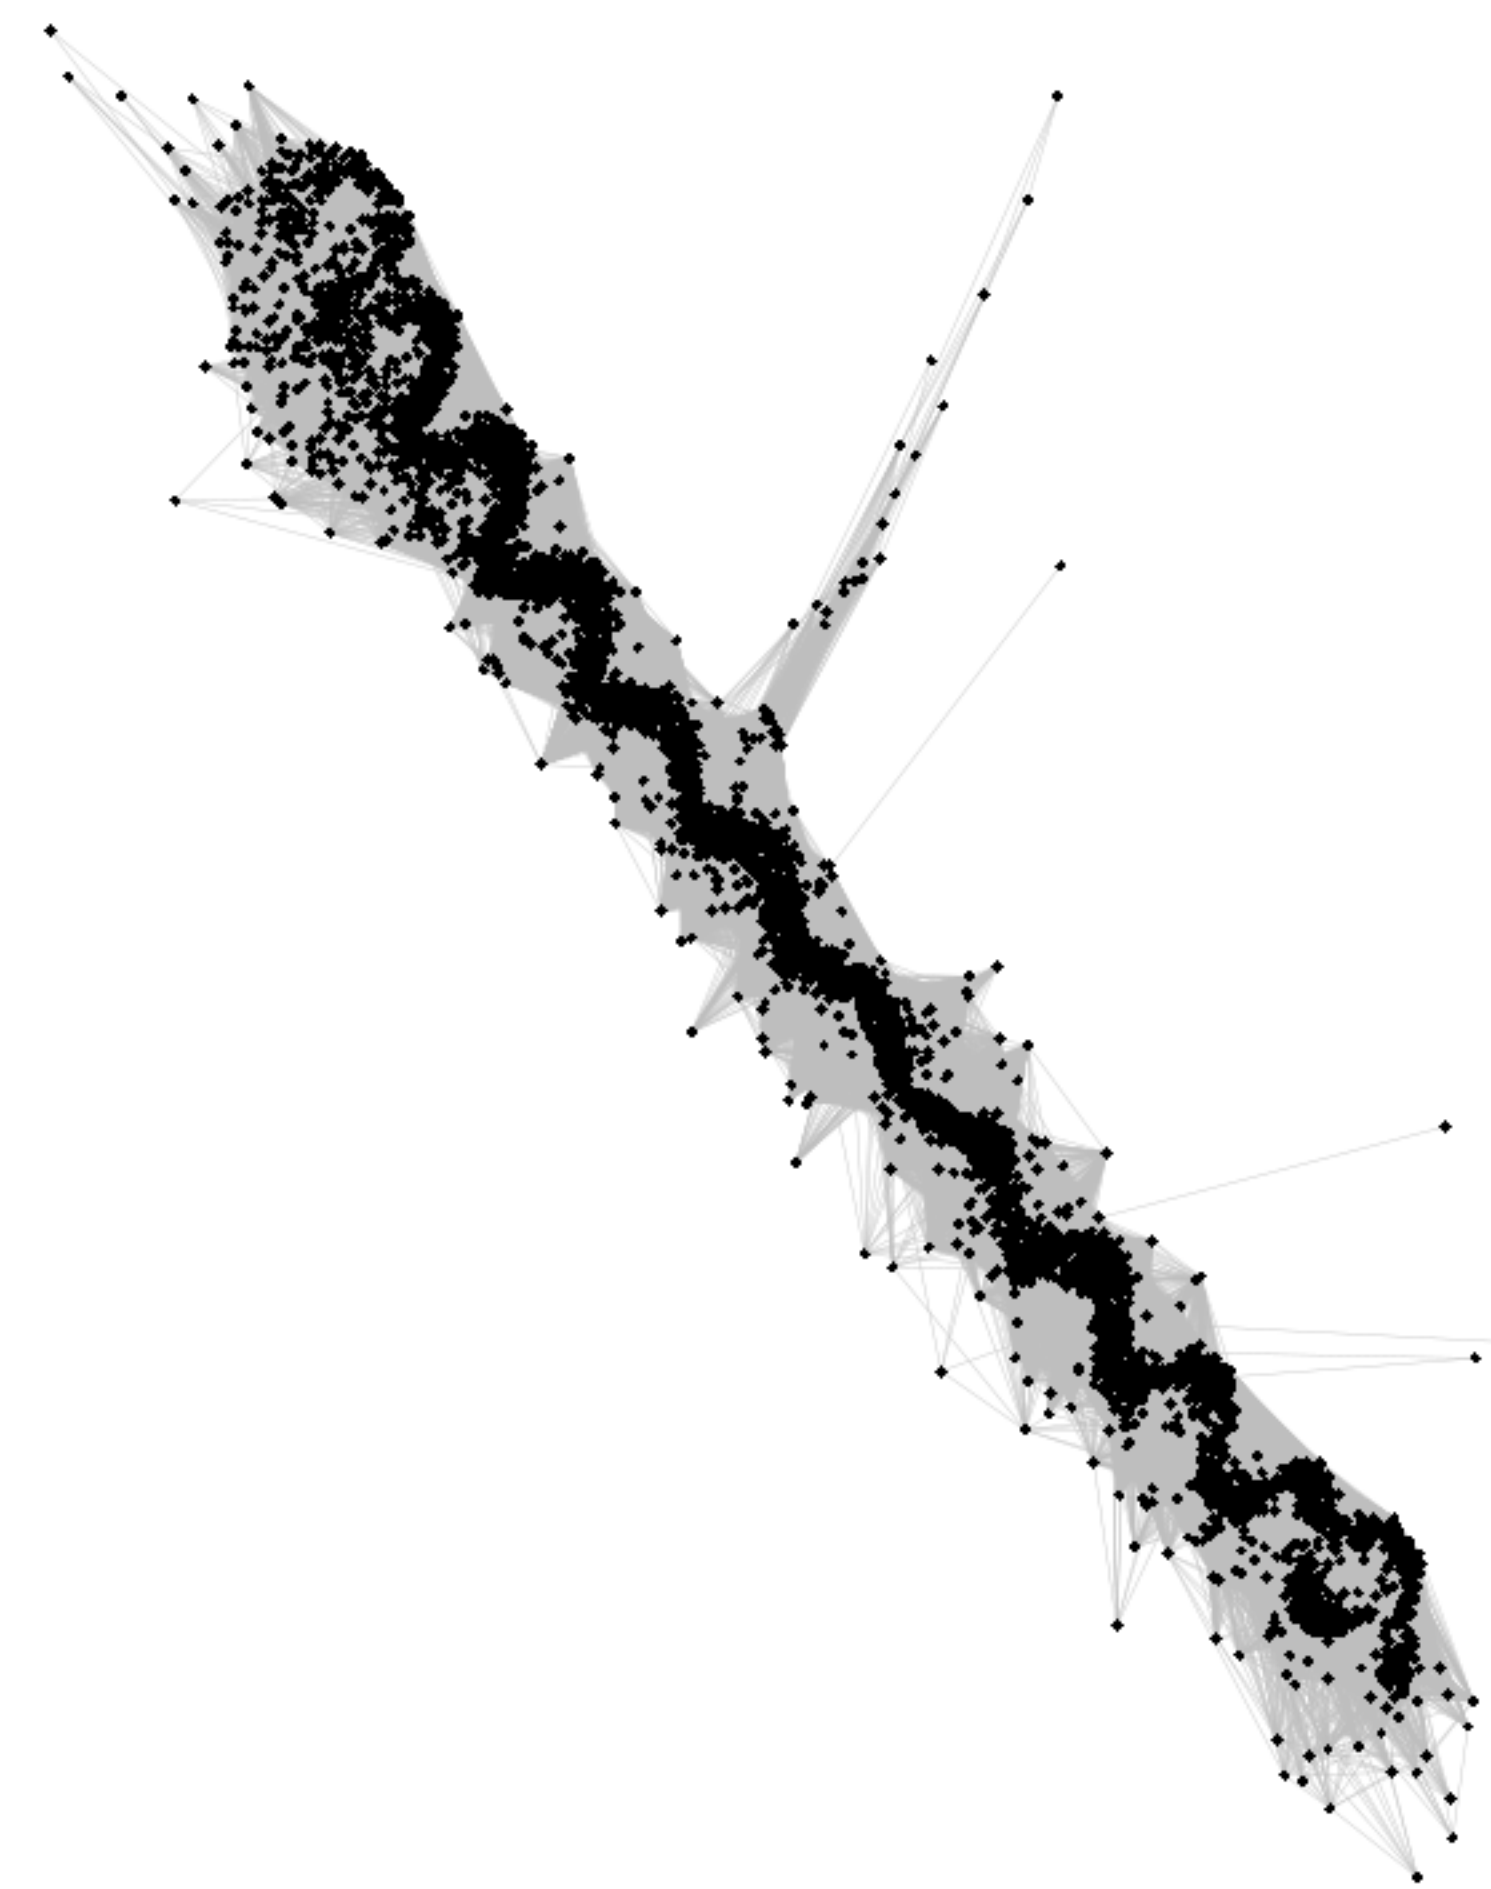

**CL84**

Number of reads: 5576  
Number of pairs: 2492353  
Density: 0.1604  
Diameter: NA  
Mean edge weigth: 175.85  
Max. degree: 1187

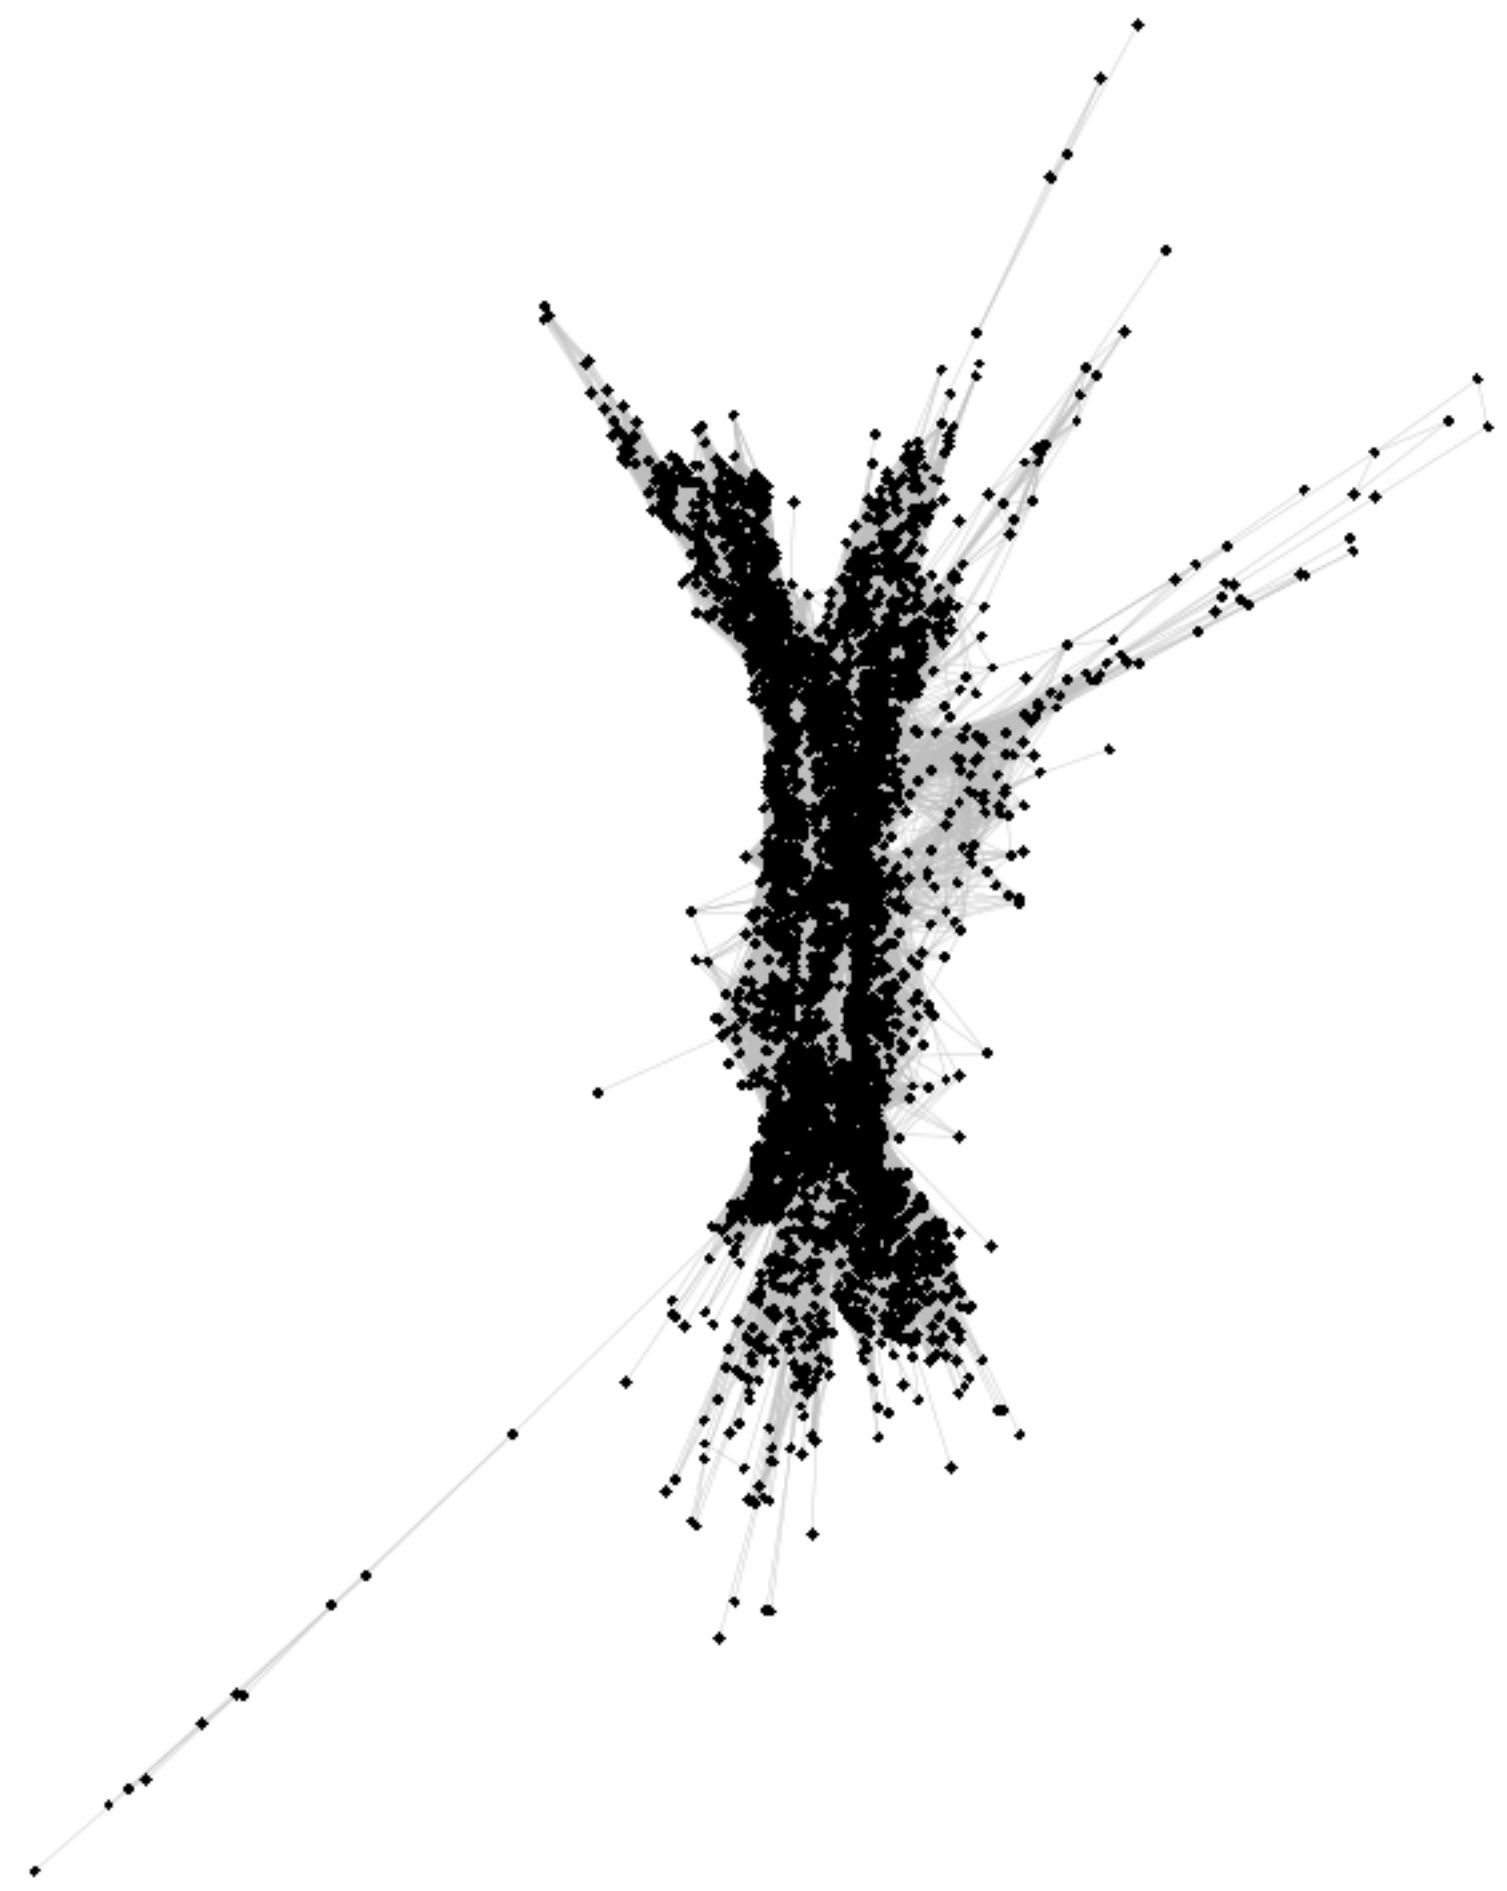

**CL85**

Number of reads: 5477  
 Number of pairs: 683406  
 Density: 0.04557  
 Diameter: NA  
 Mean edge weight: 156.1  
 Max. degree: 975

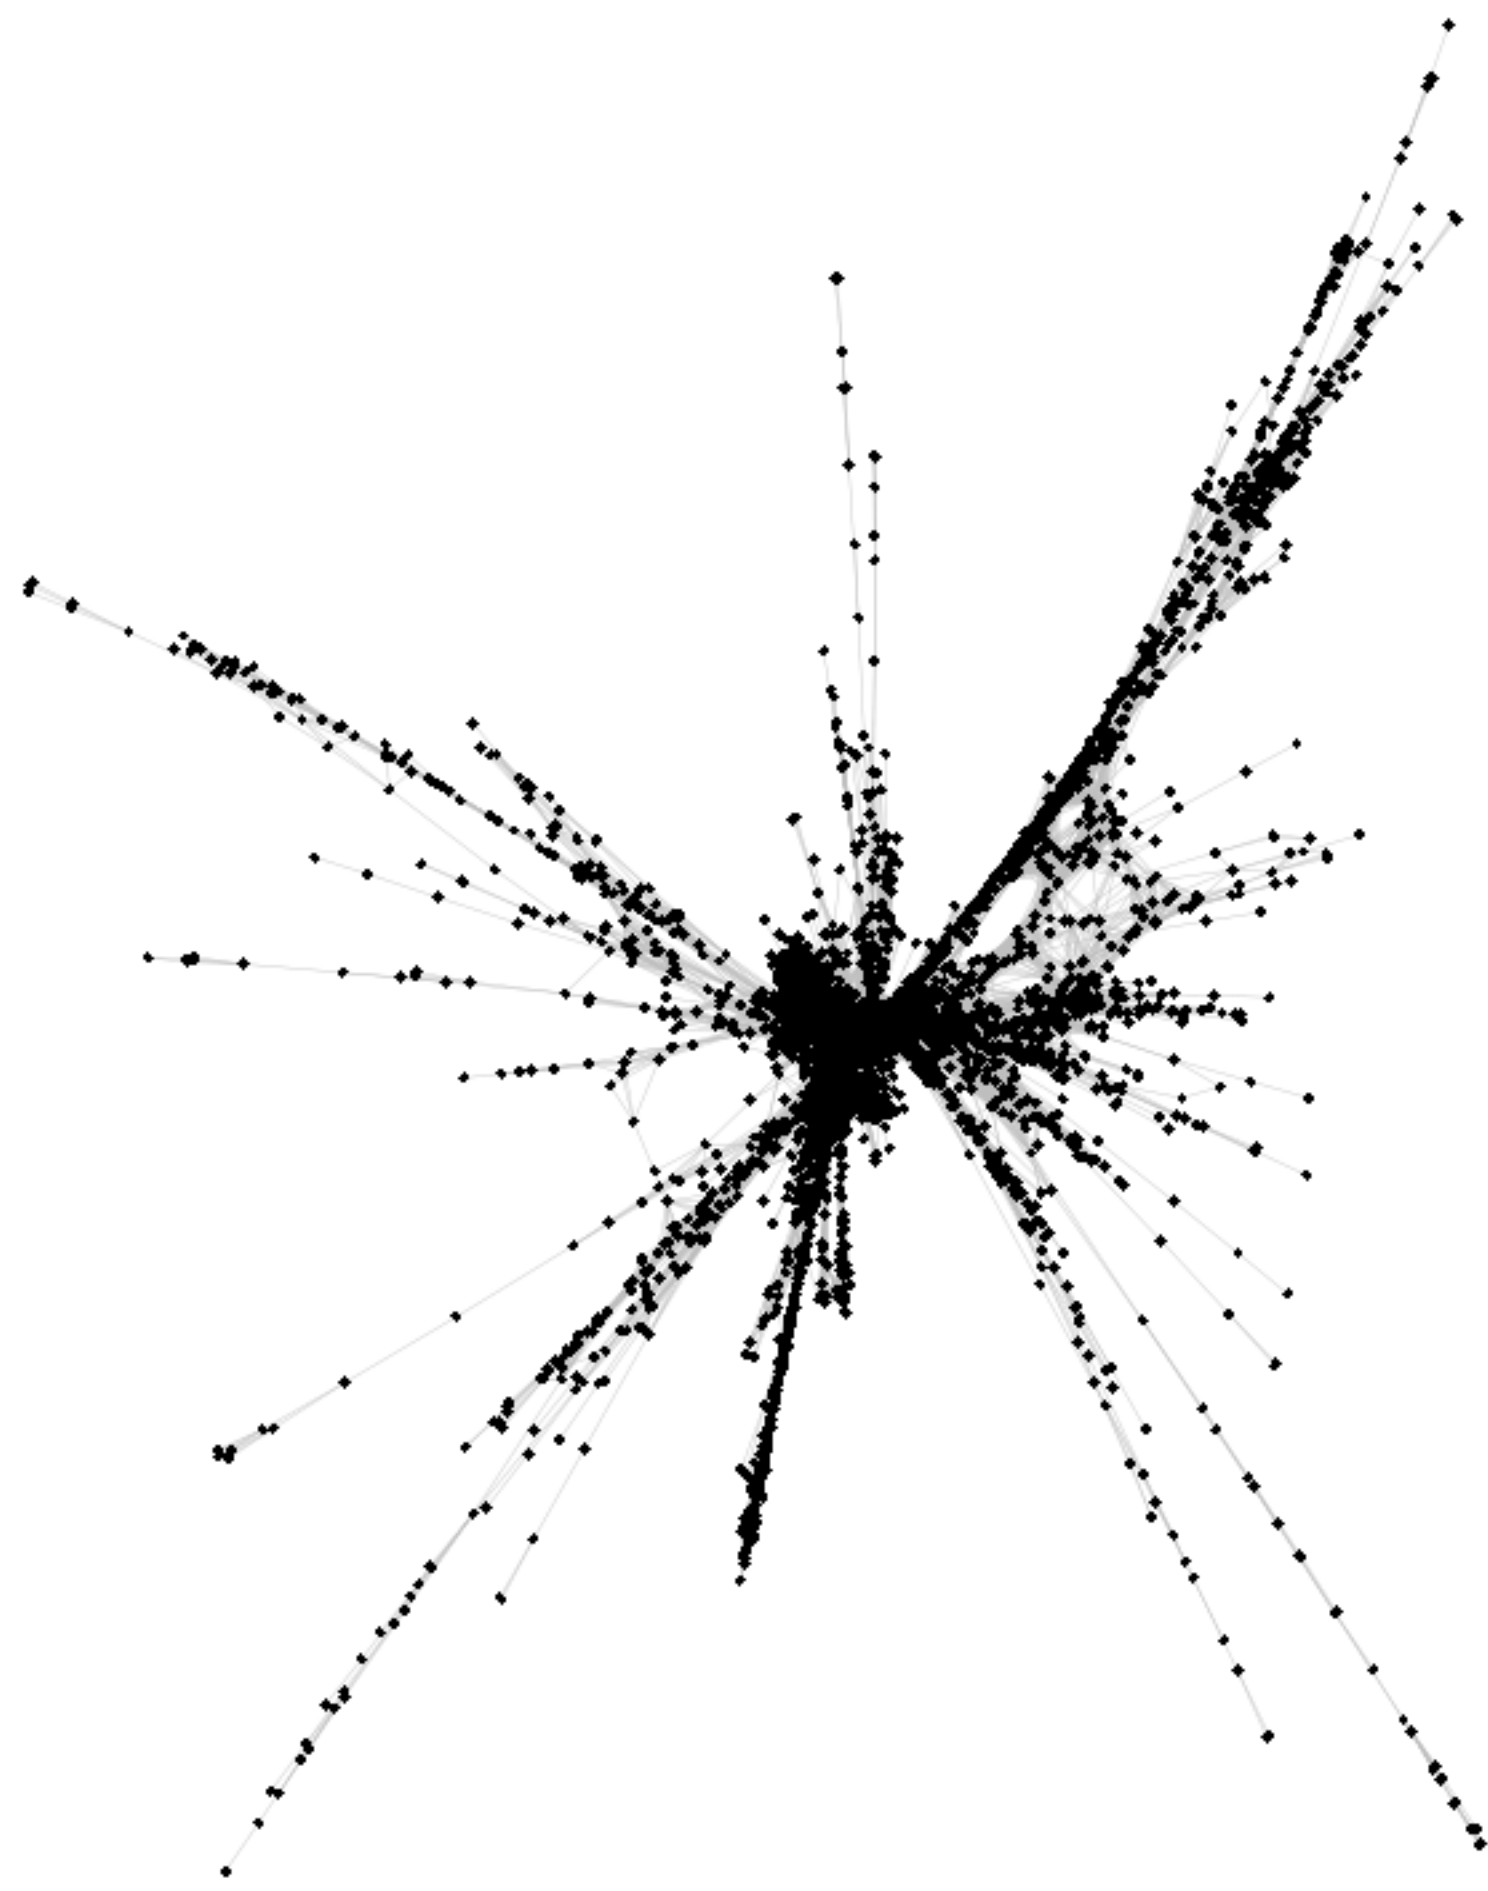

**CL86**

Number of reads: 5368  
 Number of pairs: 688024  
 Density: 0.04776  
 Diameter: NA  
 Mean edge weight: 157.79  
 Max. degree: 1194

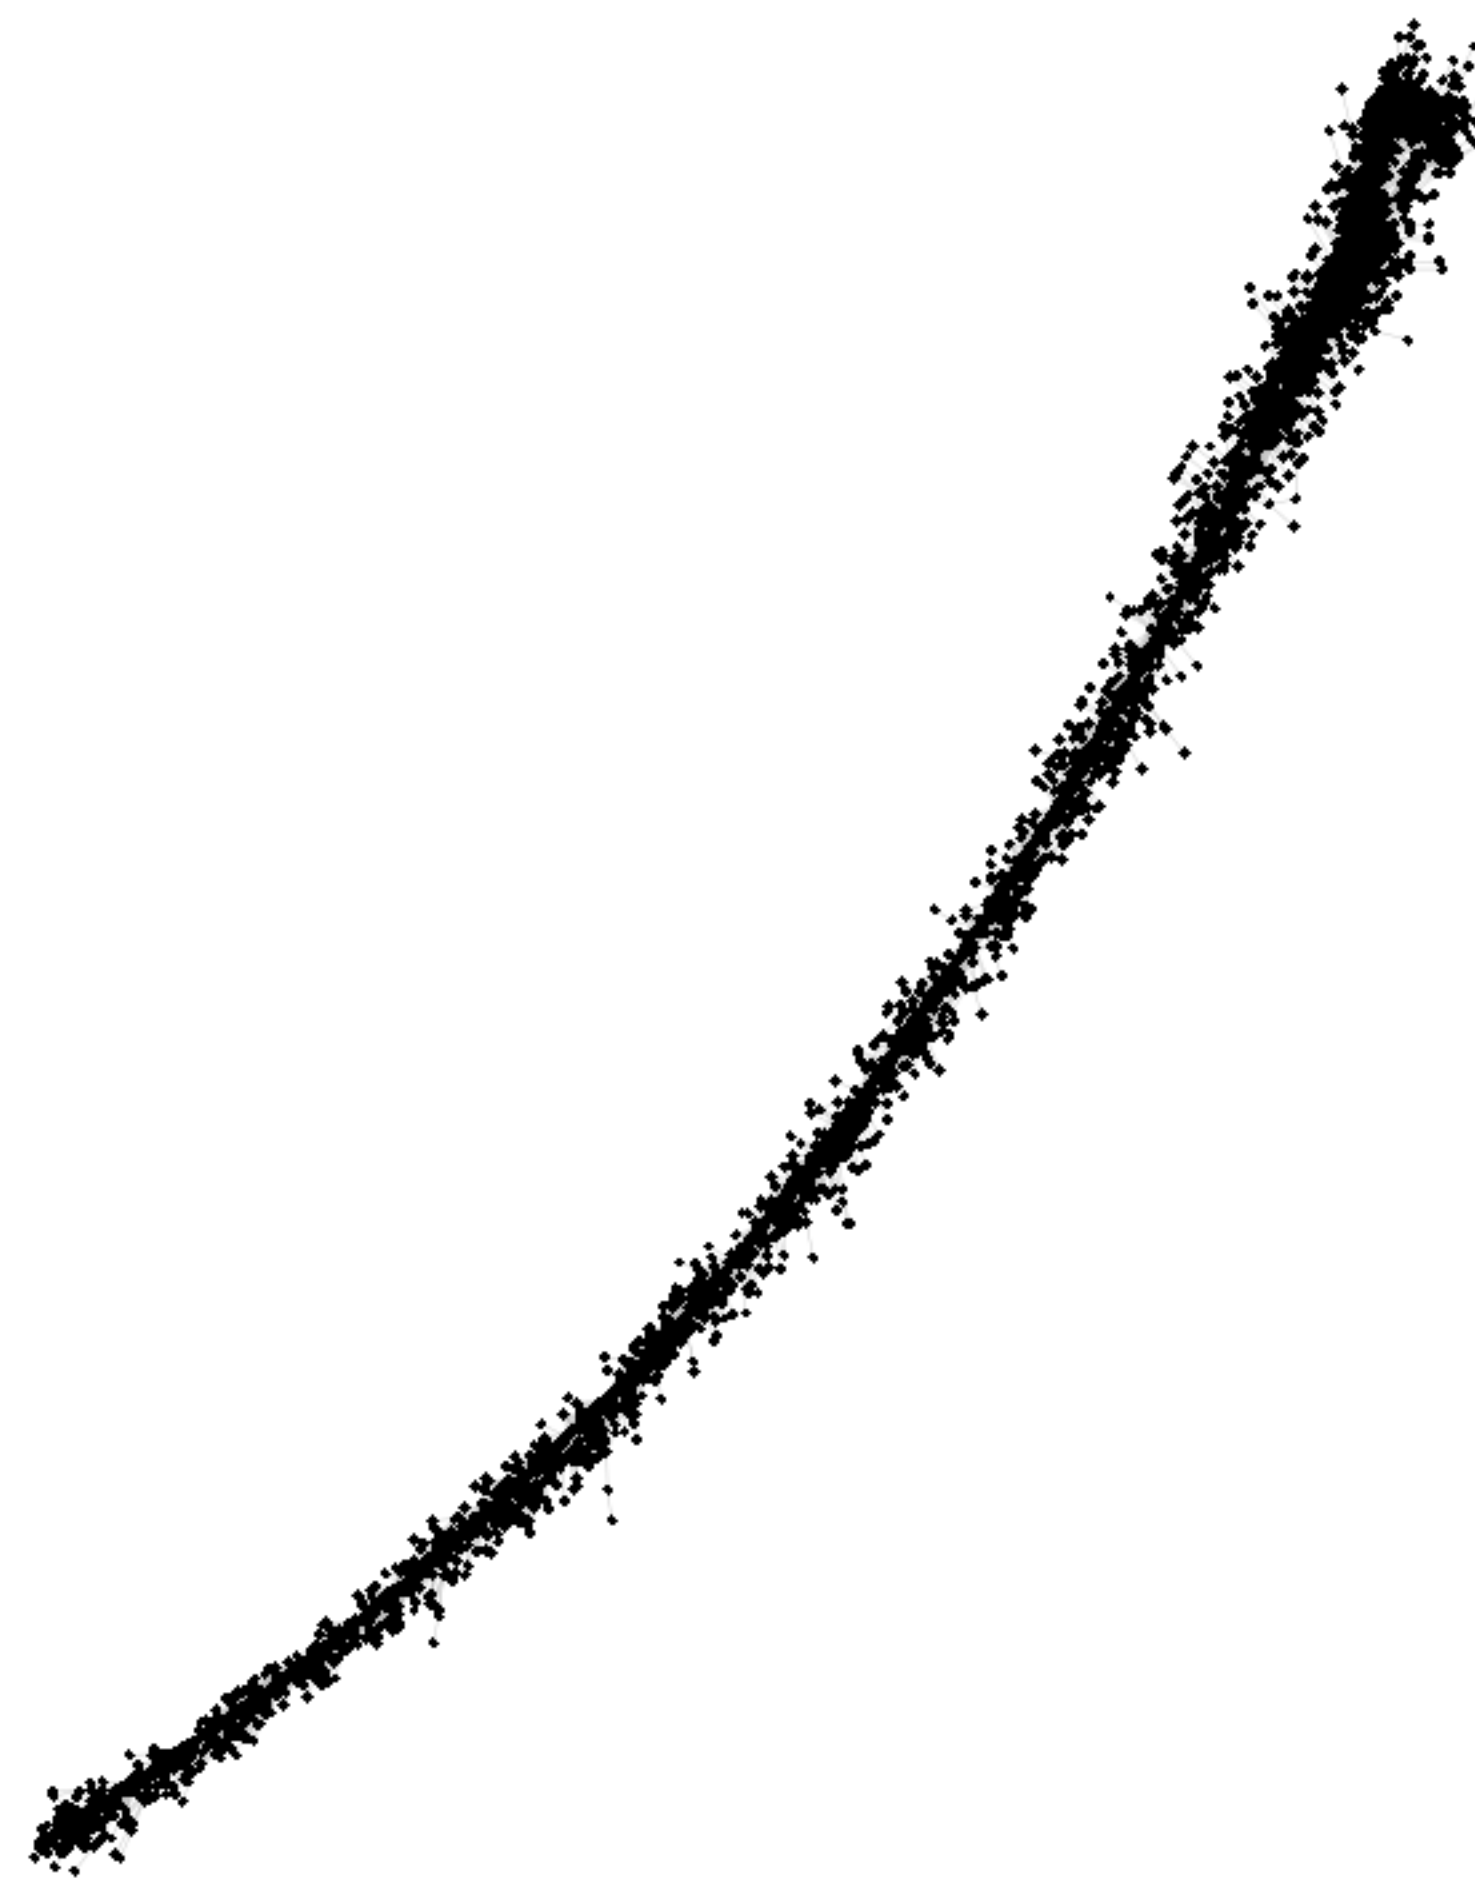

**CL87**

Number of reads: 5259  
 Number of pairs: 162272  
 Density: 0.01174  
 Diameter: NA  
 Mean edge weight: 148.96  
 Max. degree: 264

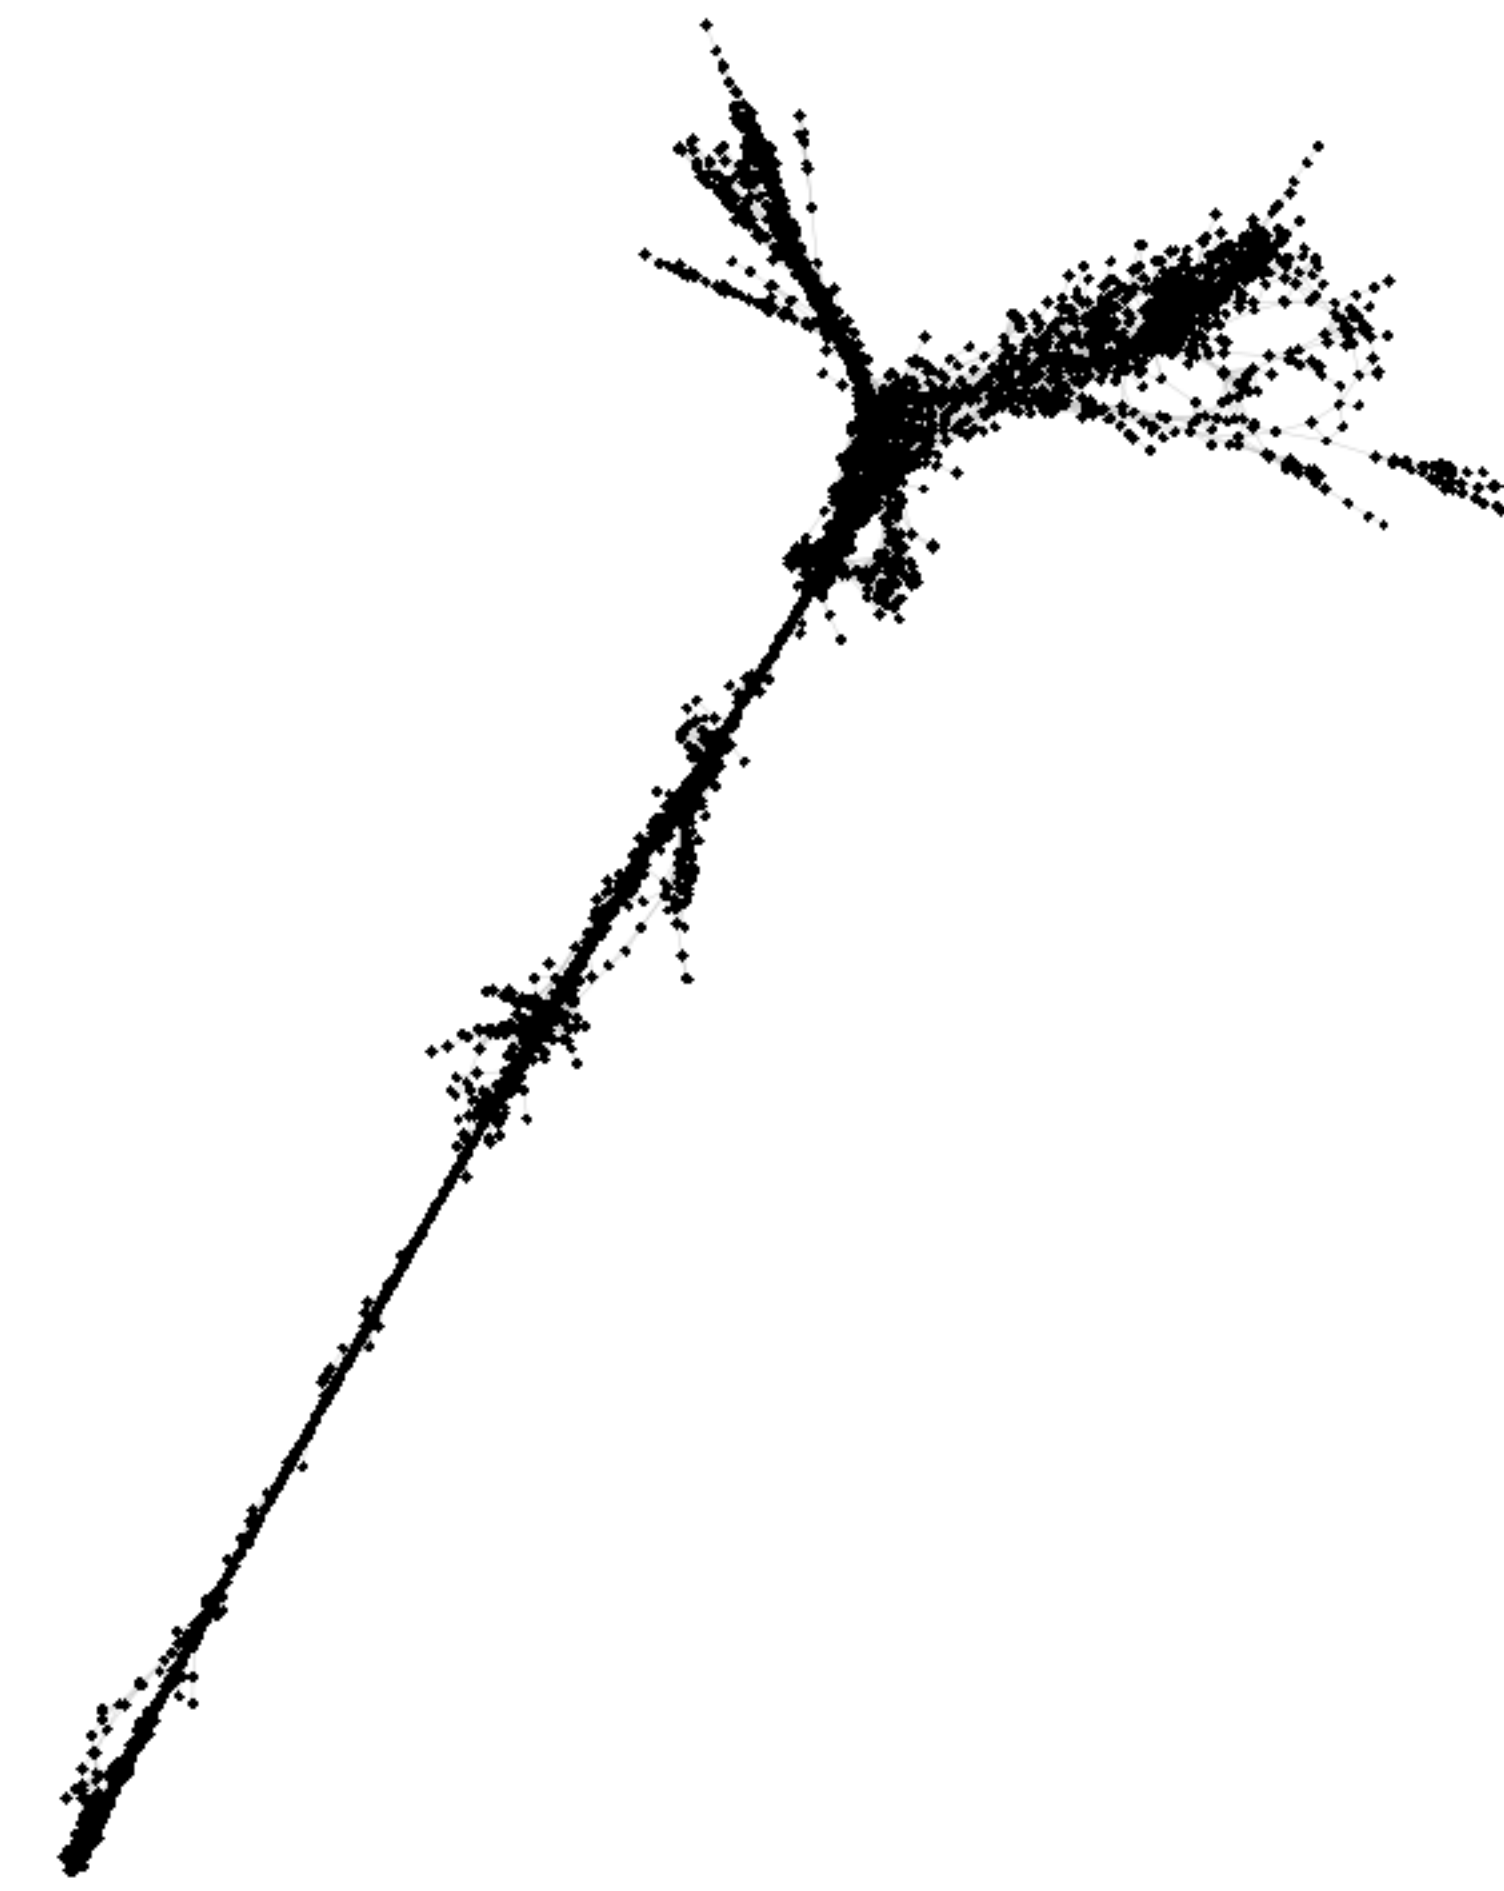

**CL88**

Number of reads: 4998  
 Number of pairs: 137966  
 Density: 0.01105  
 Diameter: NA  
 Mean edge weight: 162.88  
 Max. degree: 212

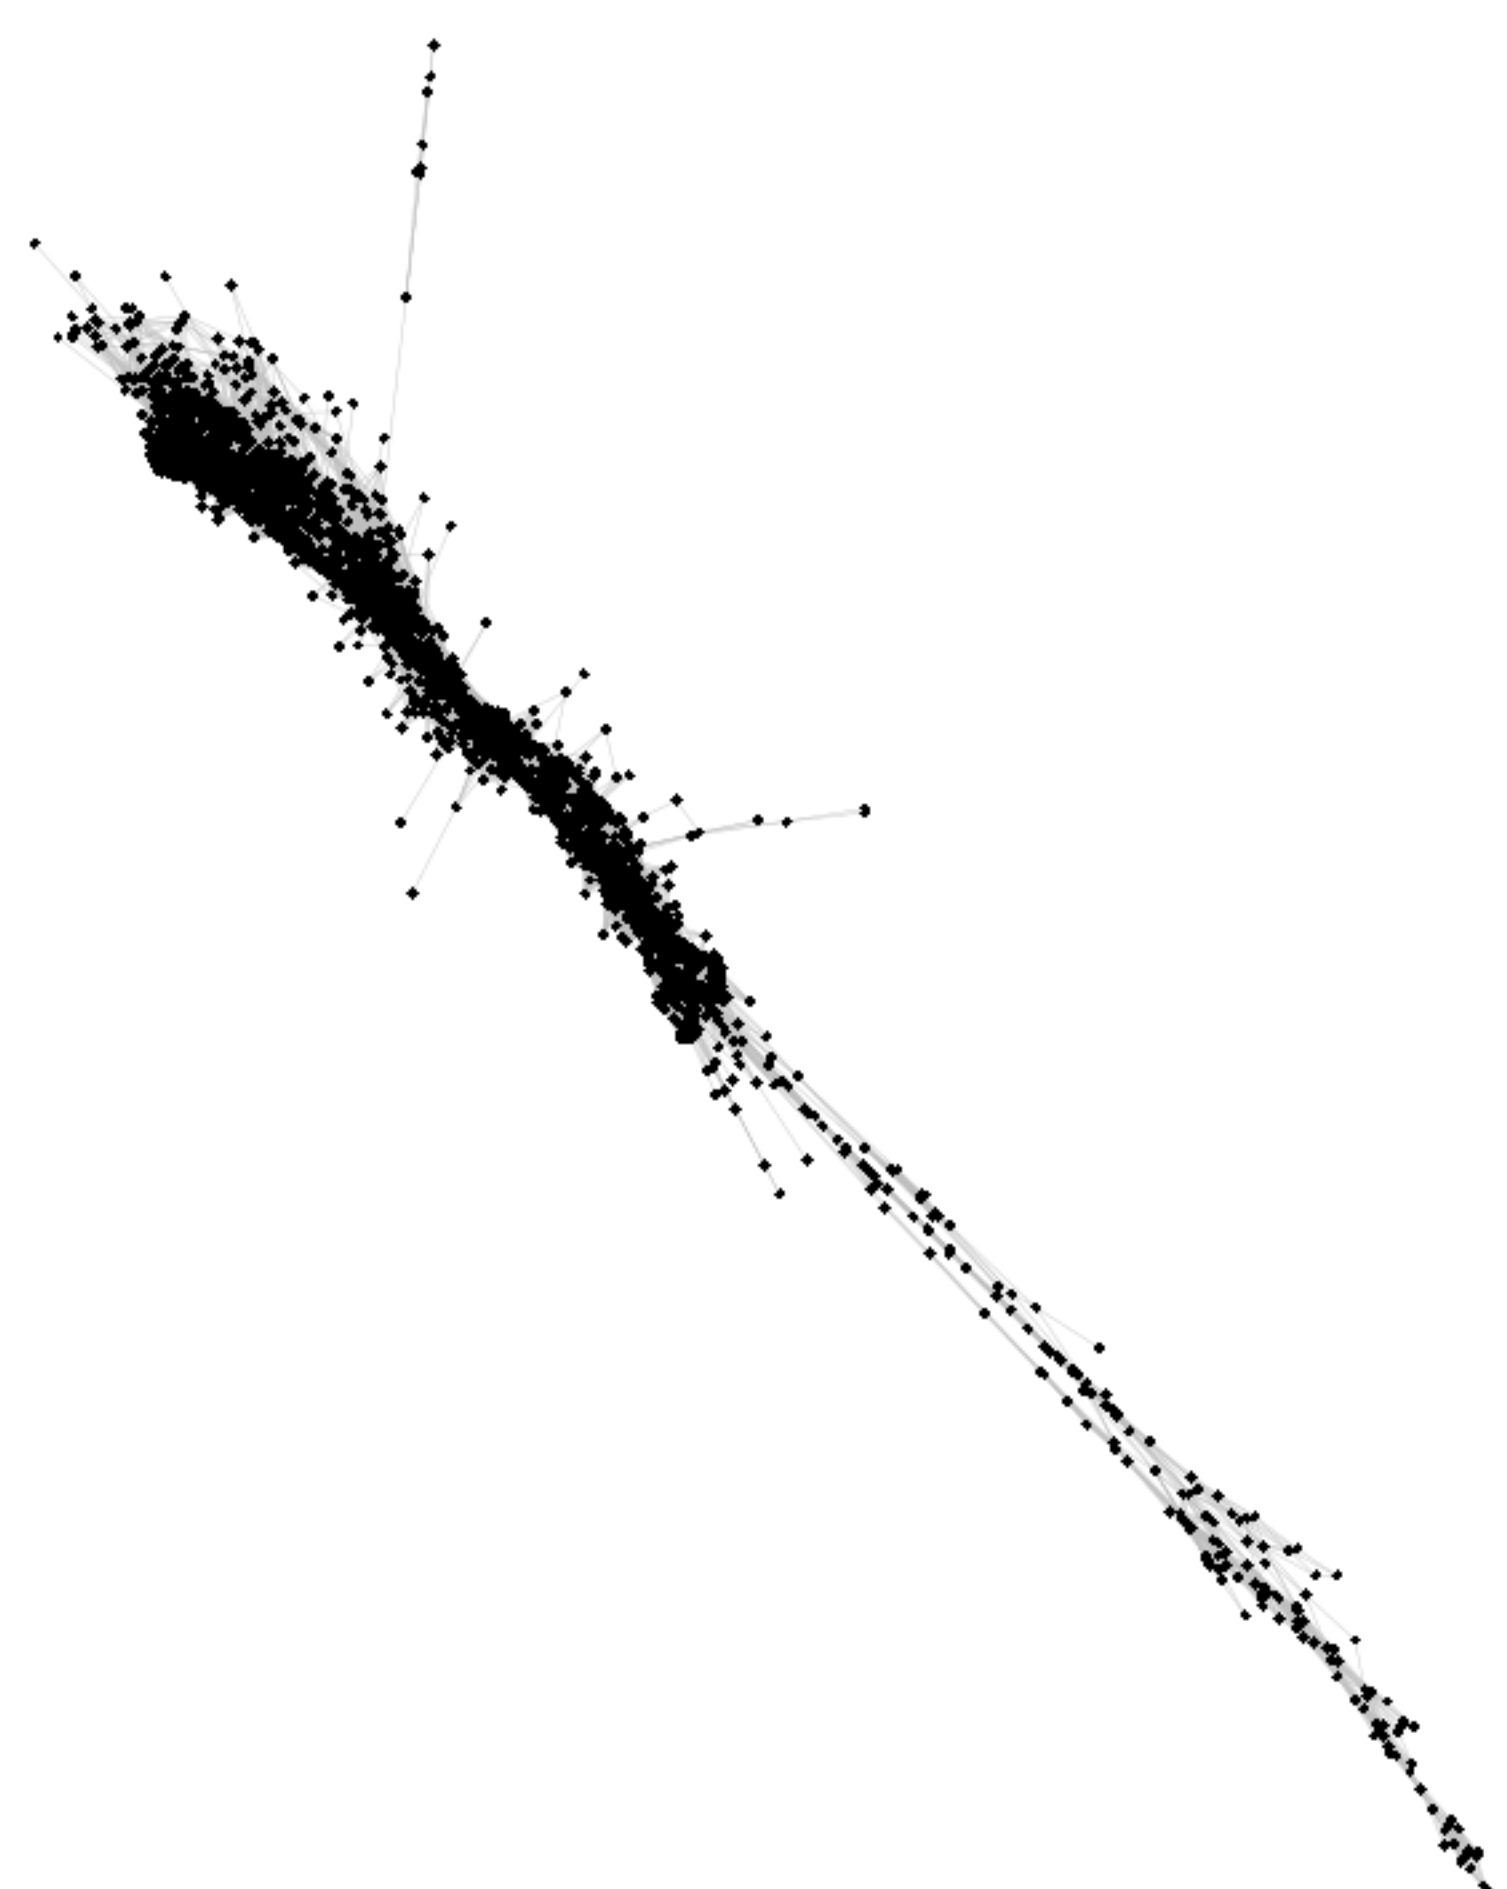

**CL89**

Number of reads: 4714  
 Number of pairs: 675891  
 Density: 0.06084  
 Diameter: NA  
 Mean edge weight: 164.94  
 Max. degree: 563

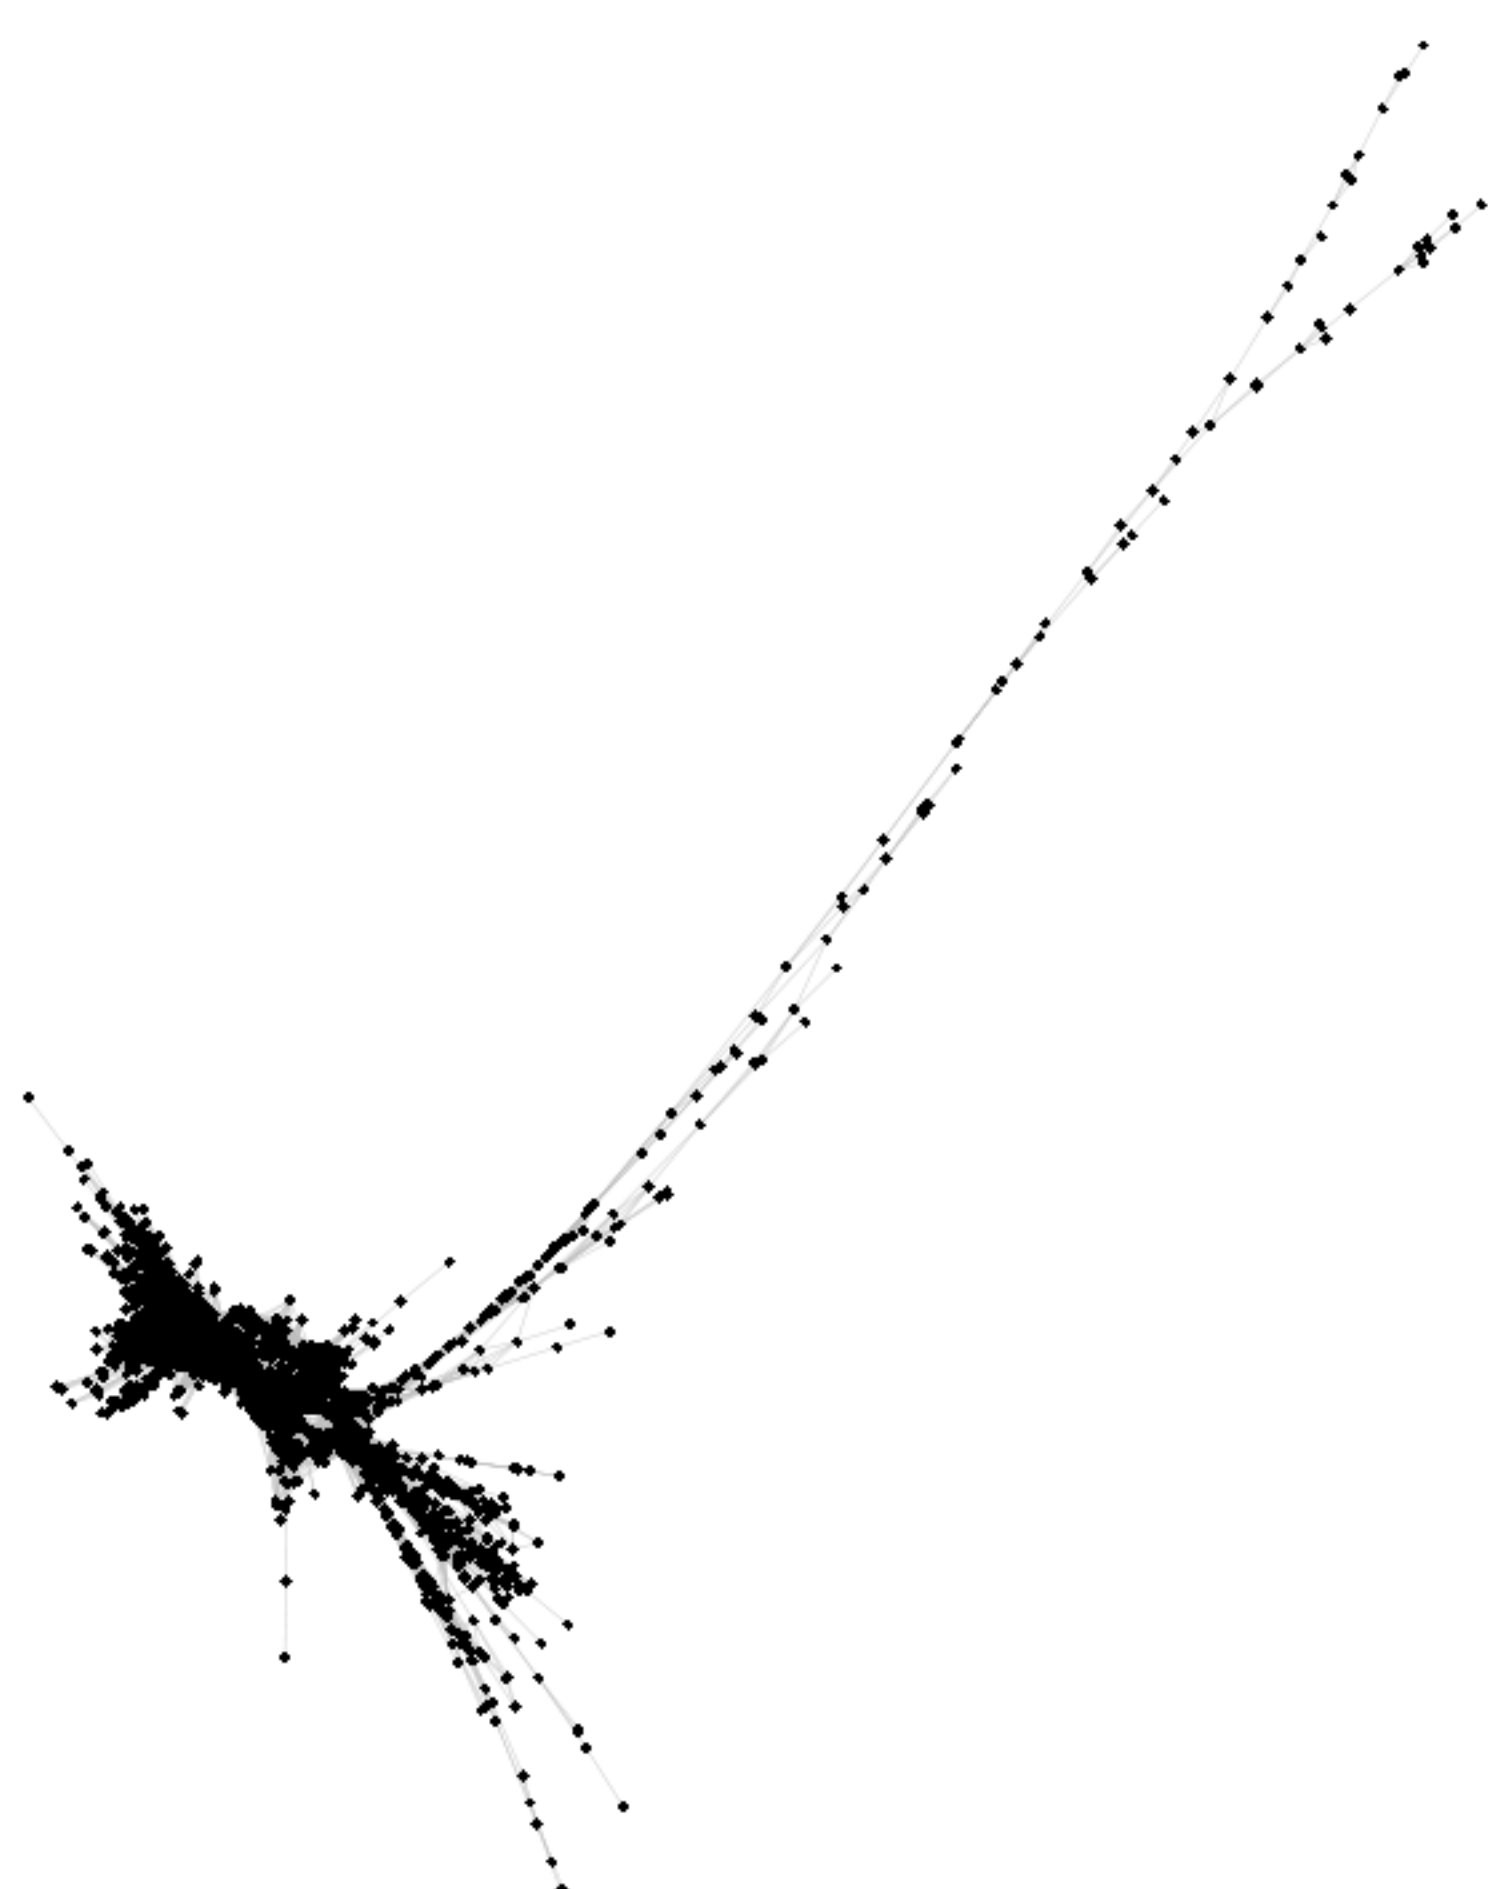

**CL90**

Number of reads: 4580  
 Number of pairs: 634290  
 Density: 0.06049  
 Diameter: NA  
 Mean edge weight: 155.78  
 Max. degree: 843

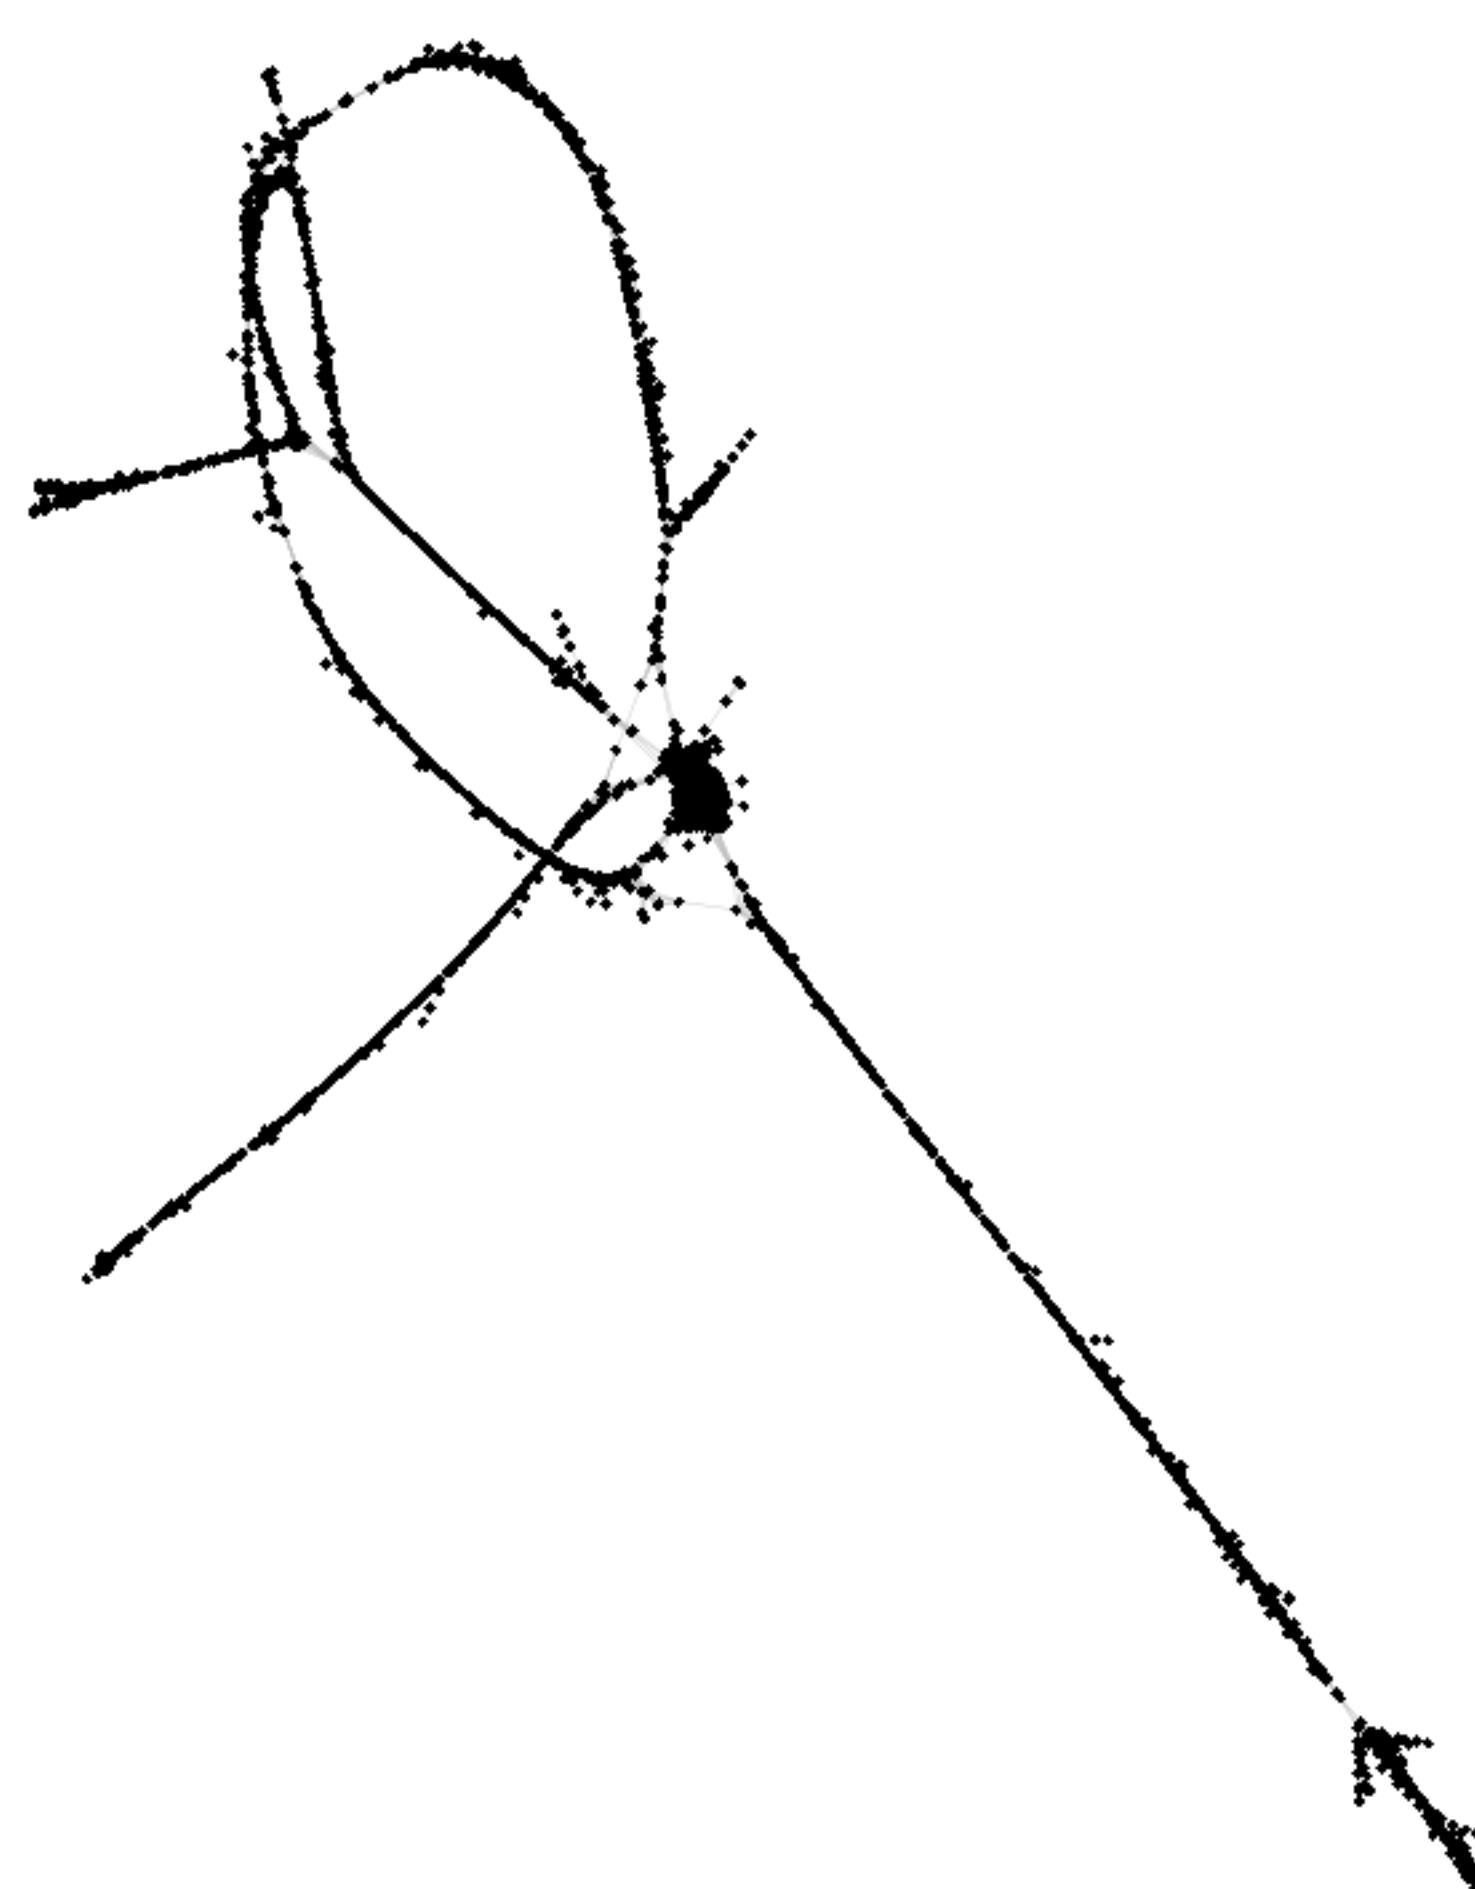

**CL91**

Number of reads: 4196  
 Number of pairs: 73585  
 Density: 0.008361  
 Diameter: NA  
 Mean edge weight: 156.09  
 Max. degree: 580

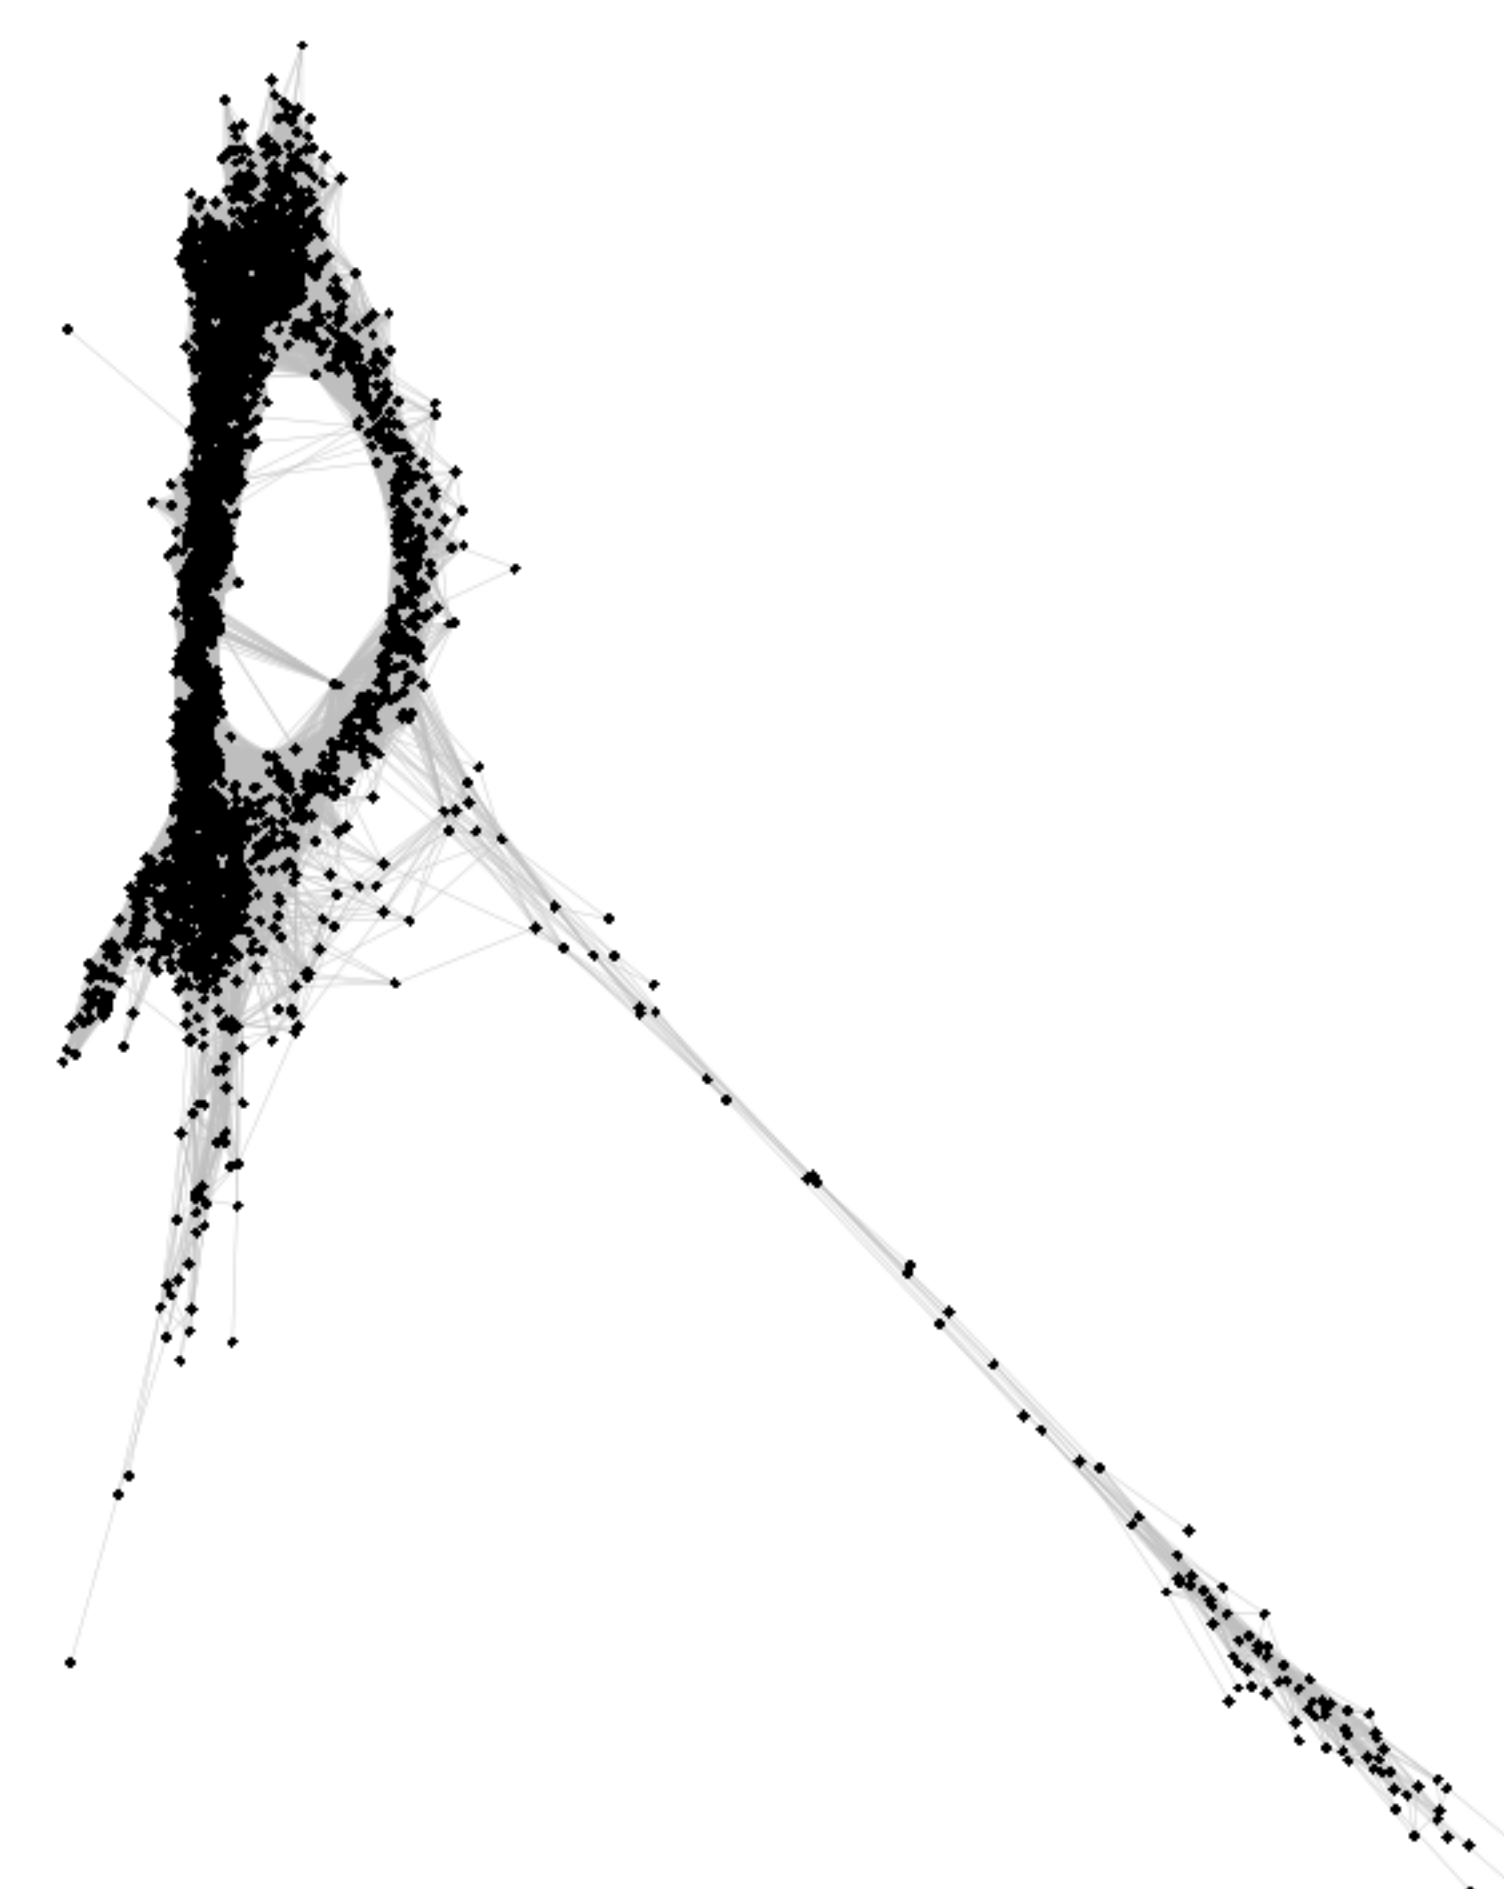

**CL92**

Number of reads: 4138  
 Number of pairs: 791986  
 Density: 0.09253  
 Diameter: NA  
 Mean edge weight: 161.92  
 Max. degree: 789

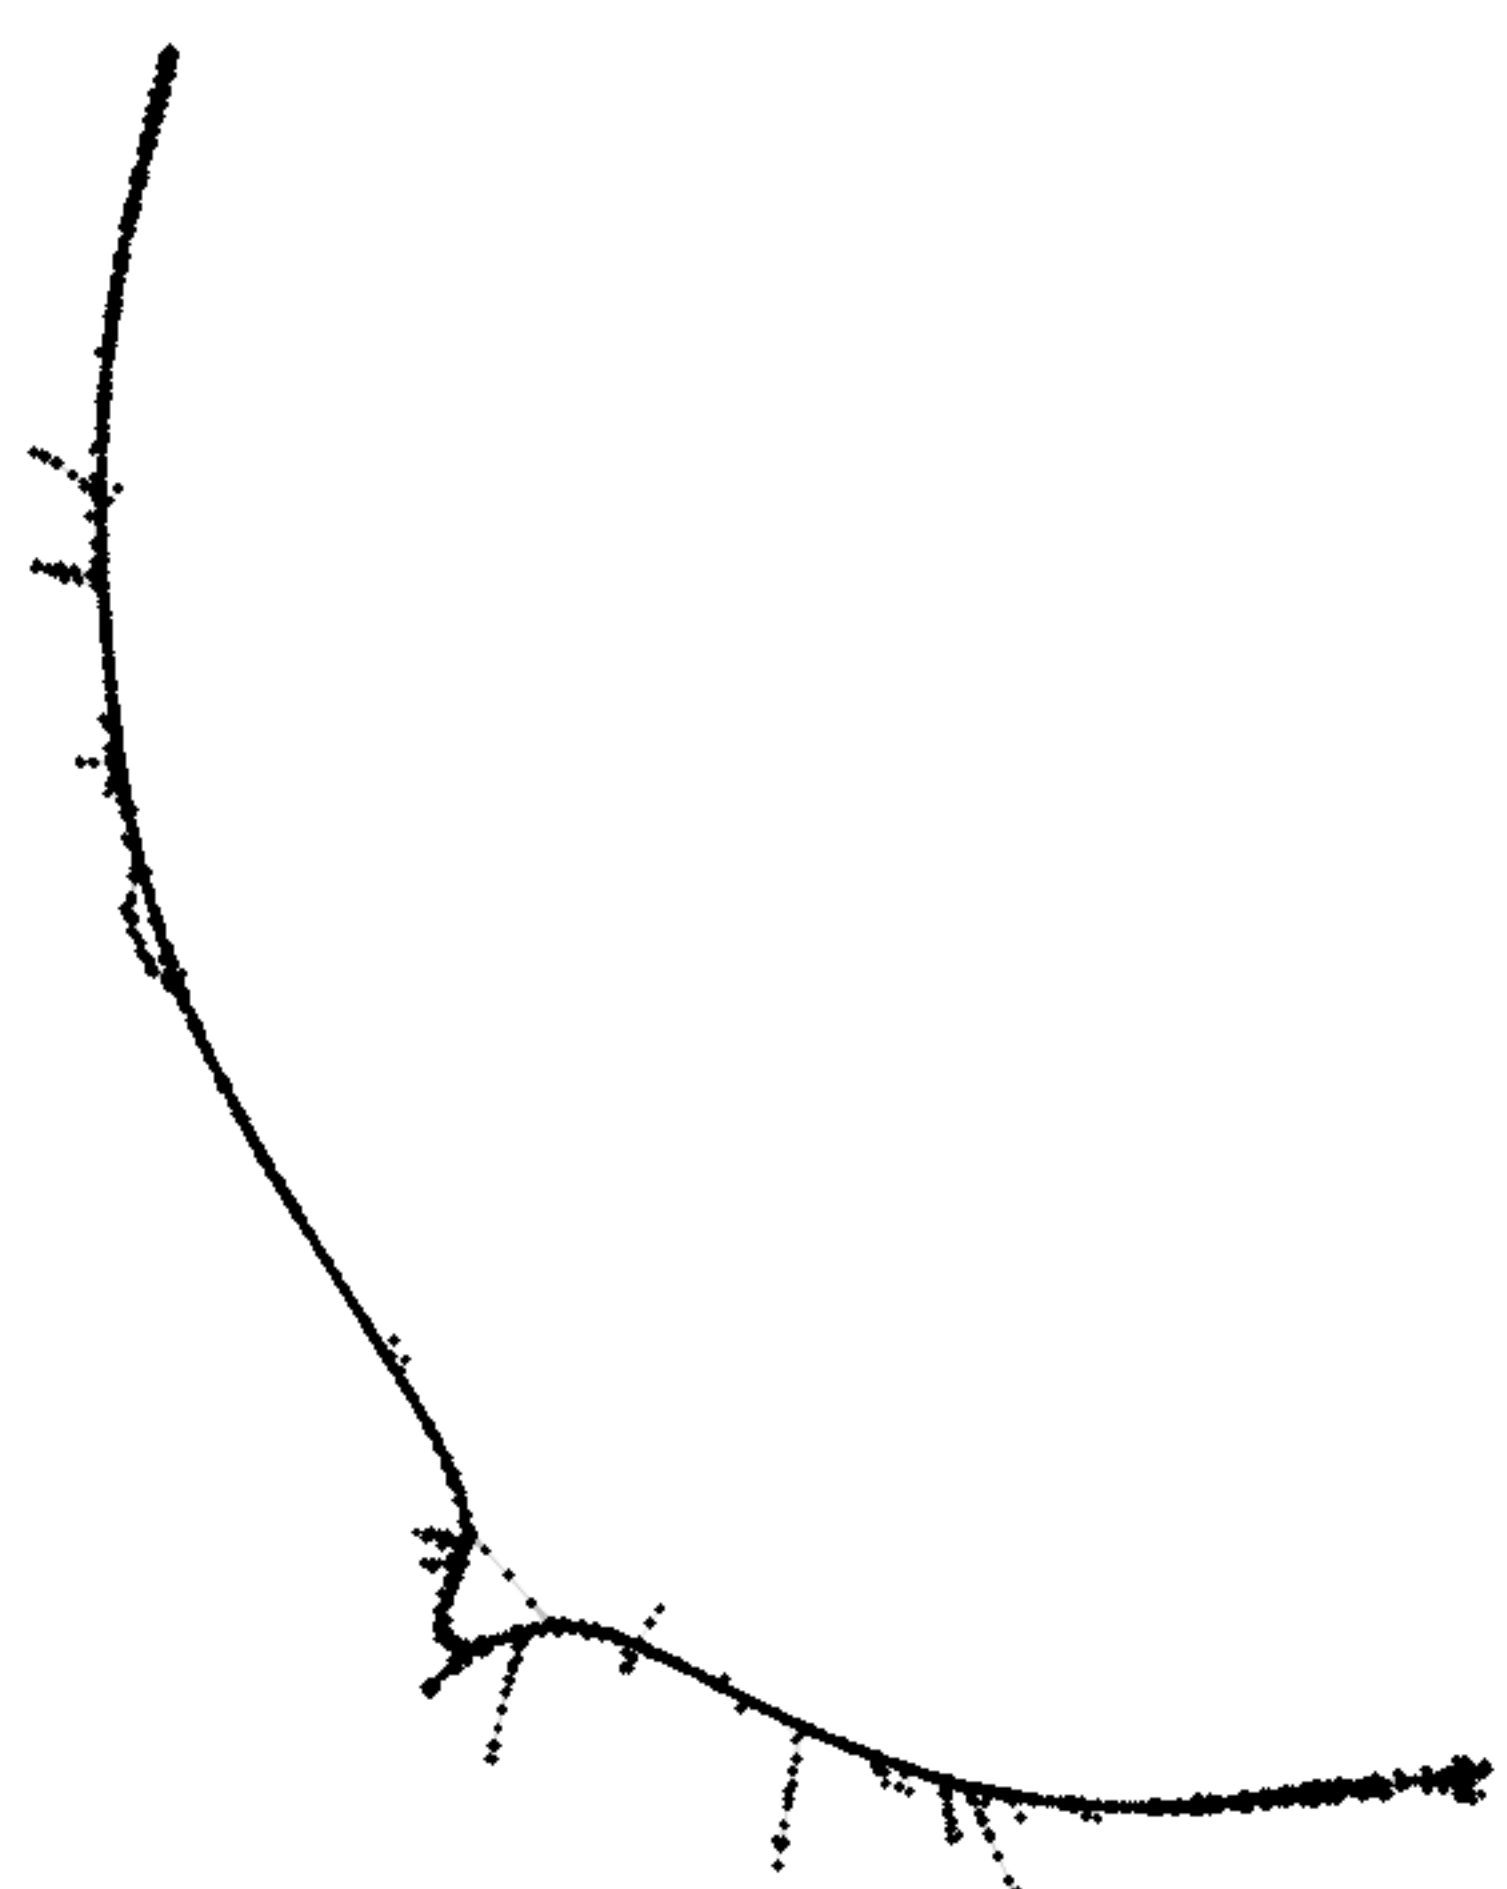

**CL93**

Number of reads: 4080  
 Number of pairs: 110423  
 Density: 0.01327  
 Diameter: NA  
 Mean edge weight: 211.14  
 Max. degree: 87

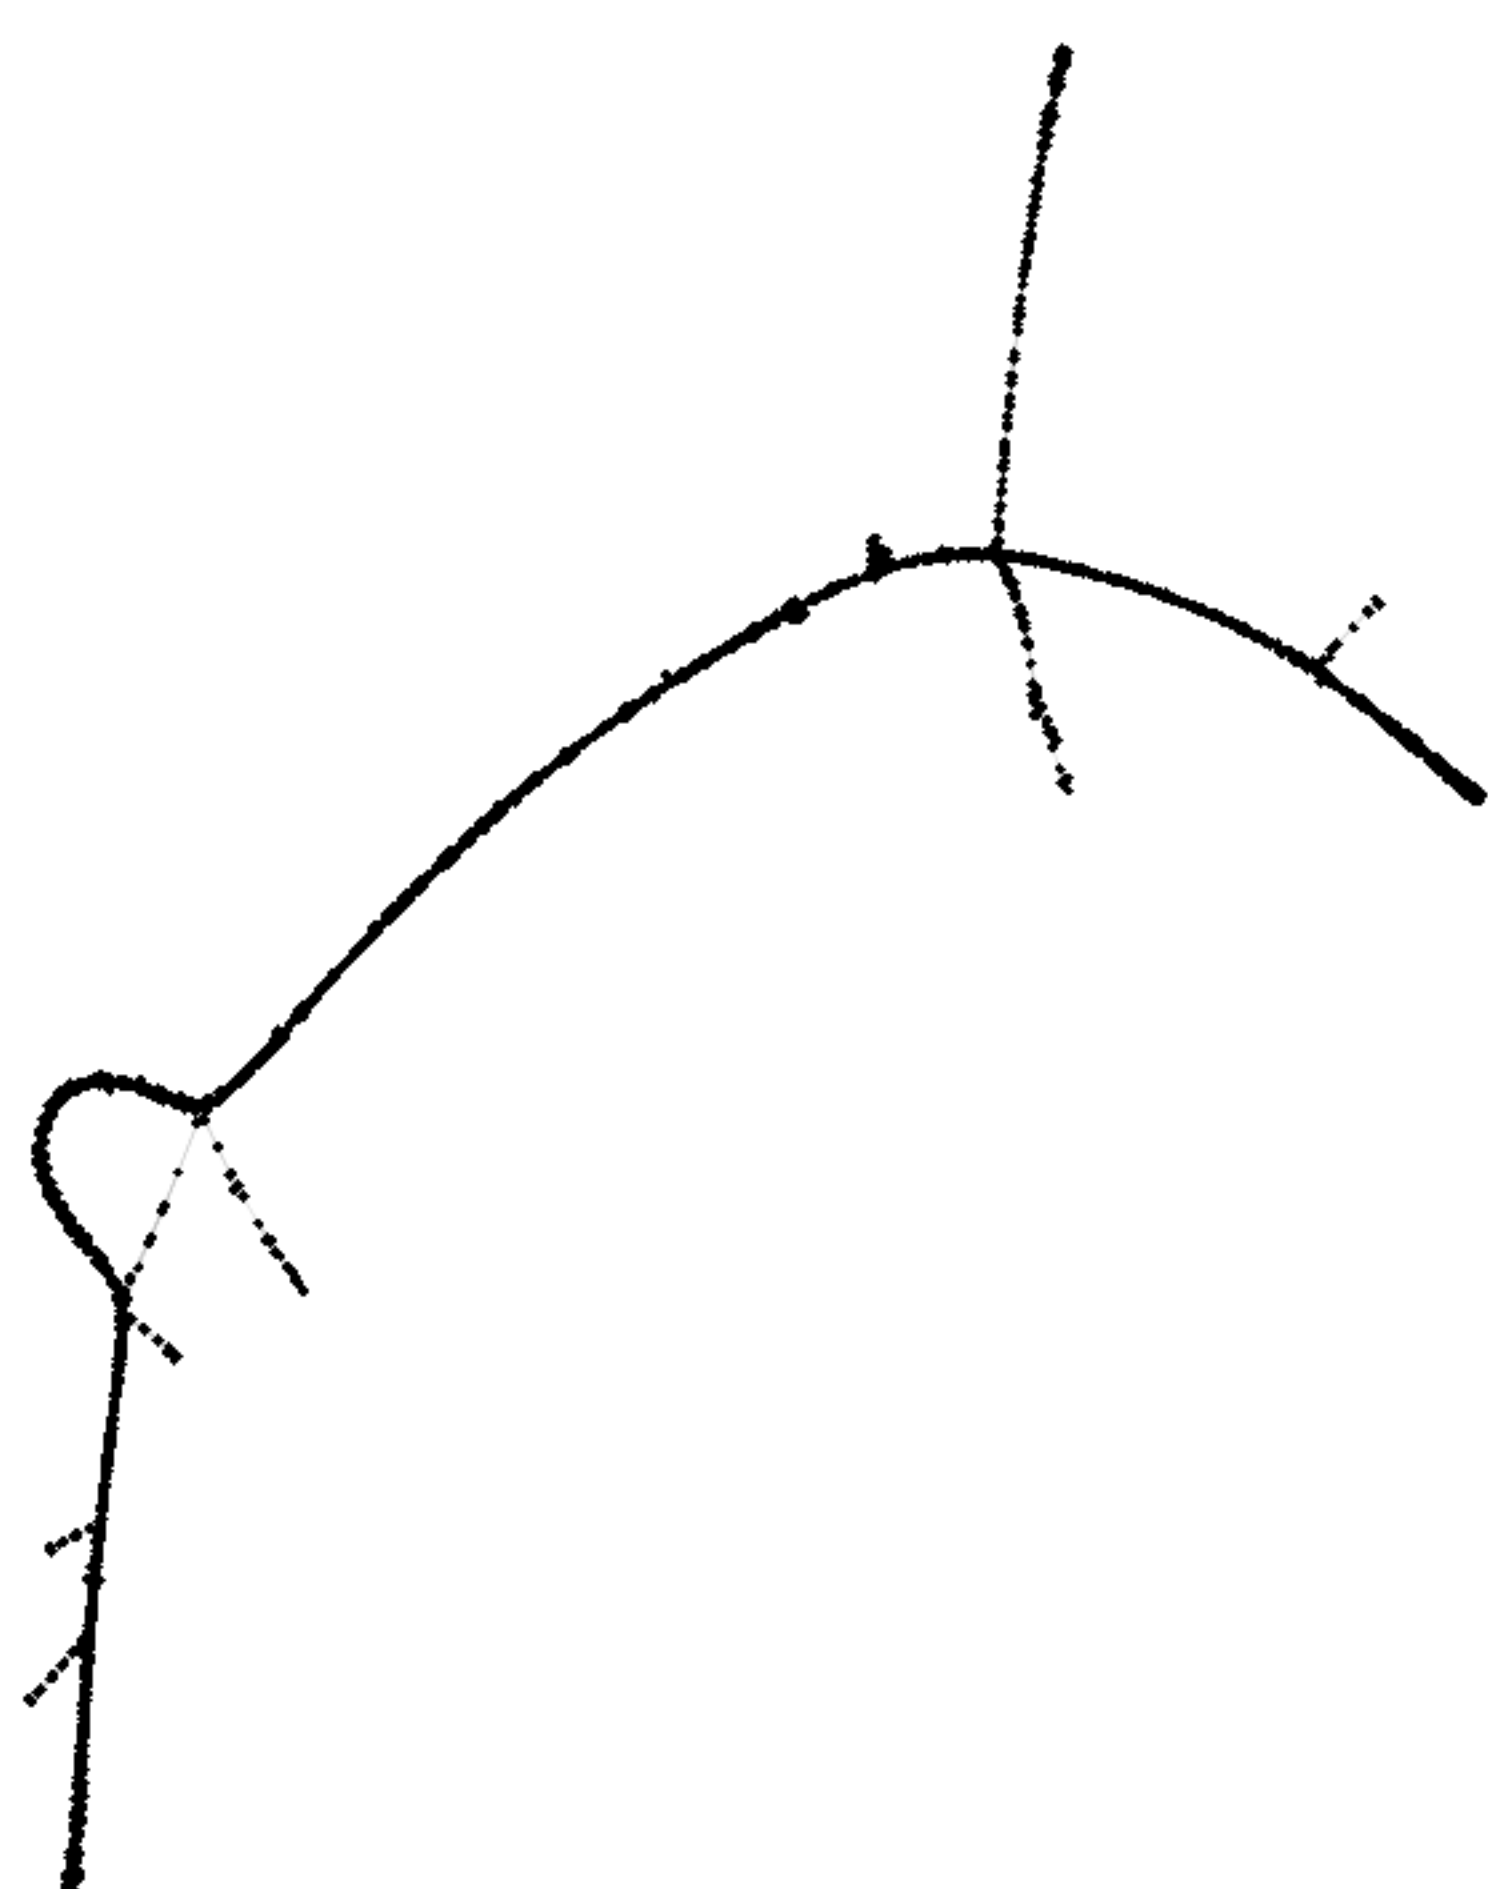

**CL94**

Number of reads: 4061  
 Number of pairs: 104654  
 Density: 0.01269  
 Diameter: NA  
 Mean edge weight: 213.52  
 Max. degree: 92

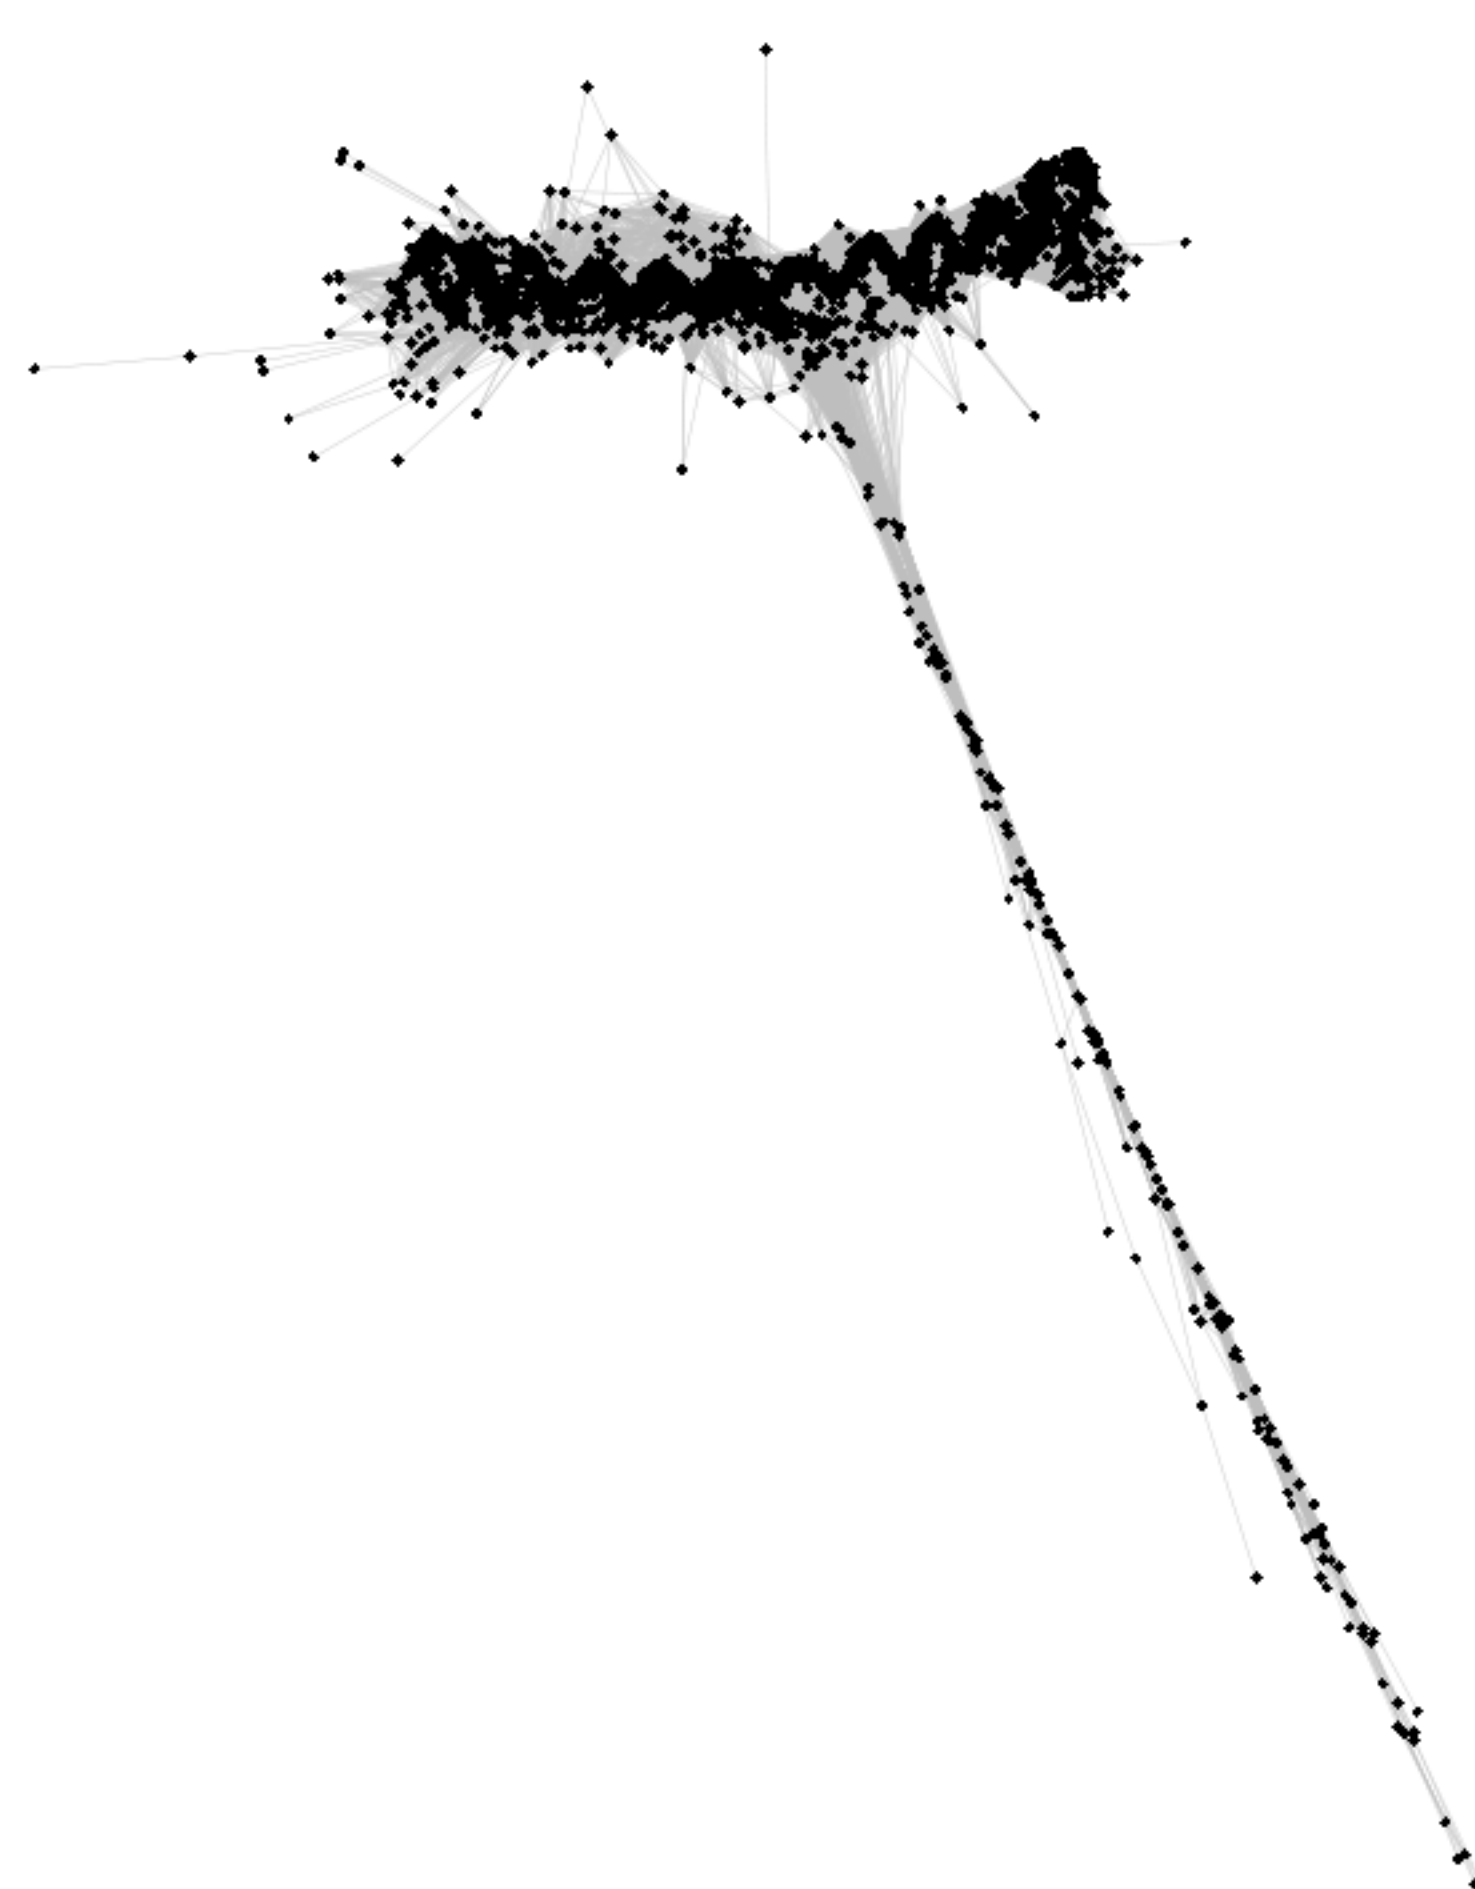

**CL95**

Number of reads: 3970  
 Number of pairs: 1150172  
 Density: 0.146  
 Diameter: NA  
 Mean edge weight: 170.55  
 Max. degree: 843

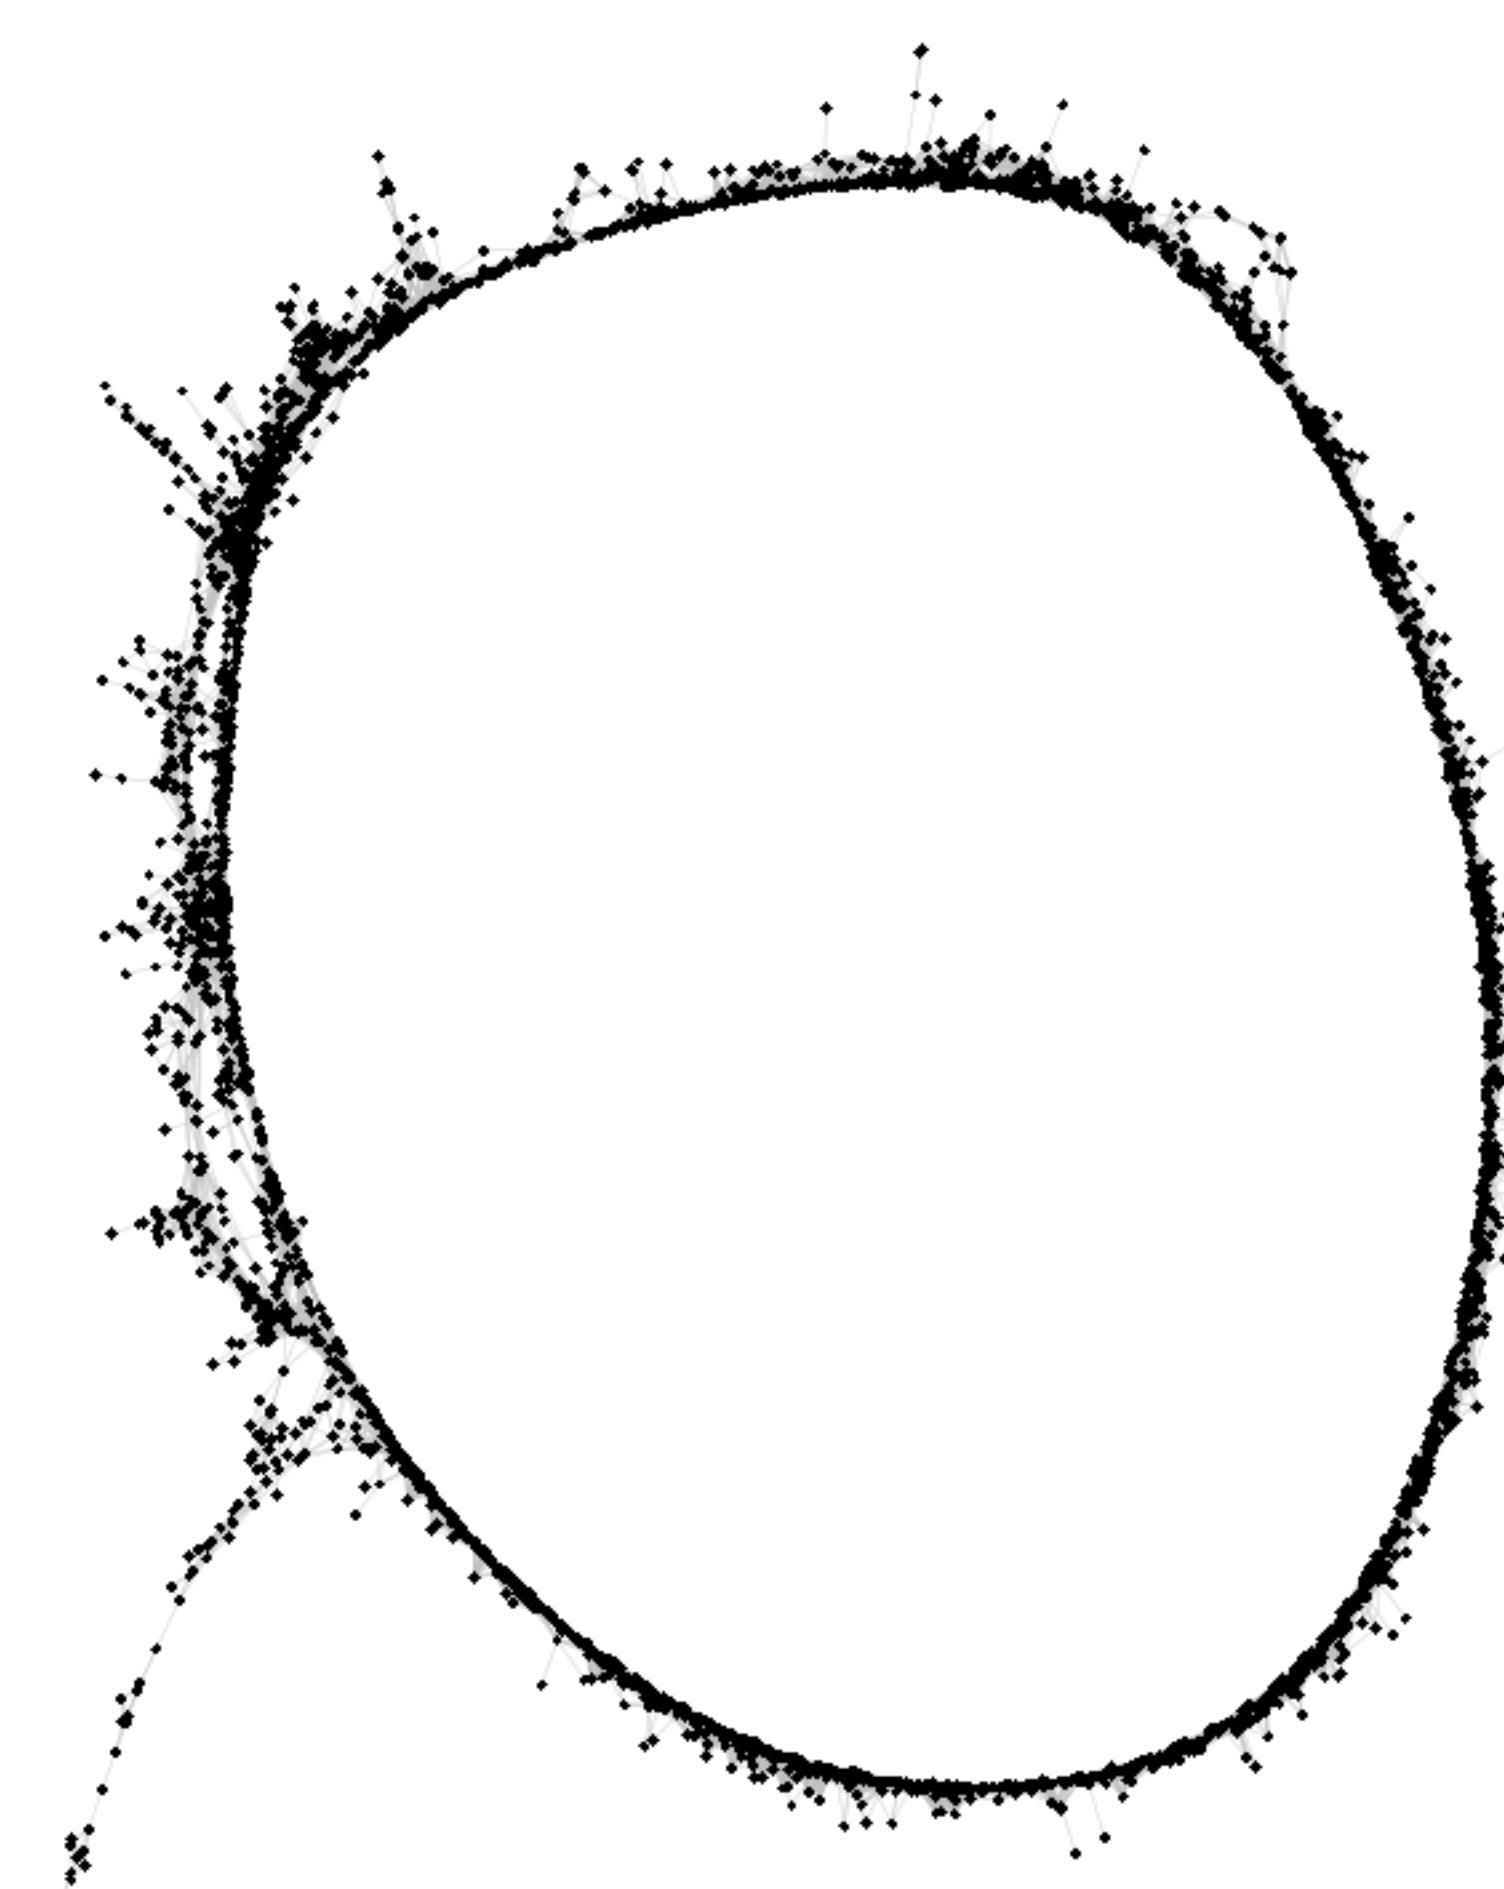

**CL96**

Number of reads: 3889  
 Number of pairs: 99597  
 Density: 0.01317  
 Diameter: NA  
 Mean edge weight: 166.47  
 Max. degree: 132



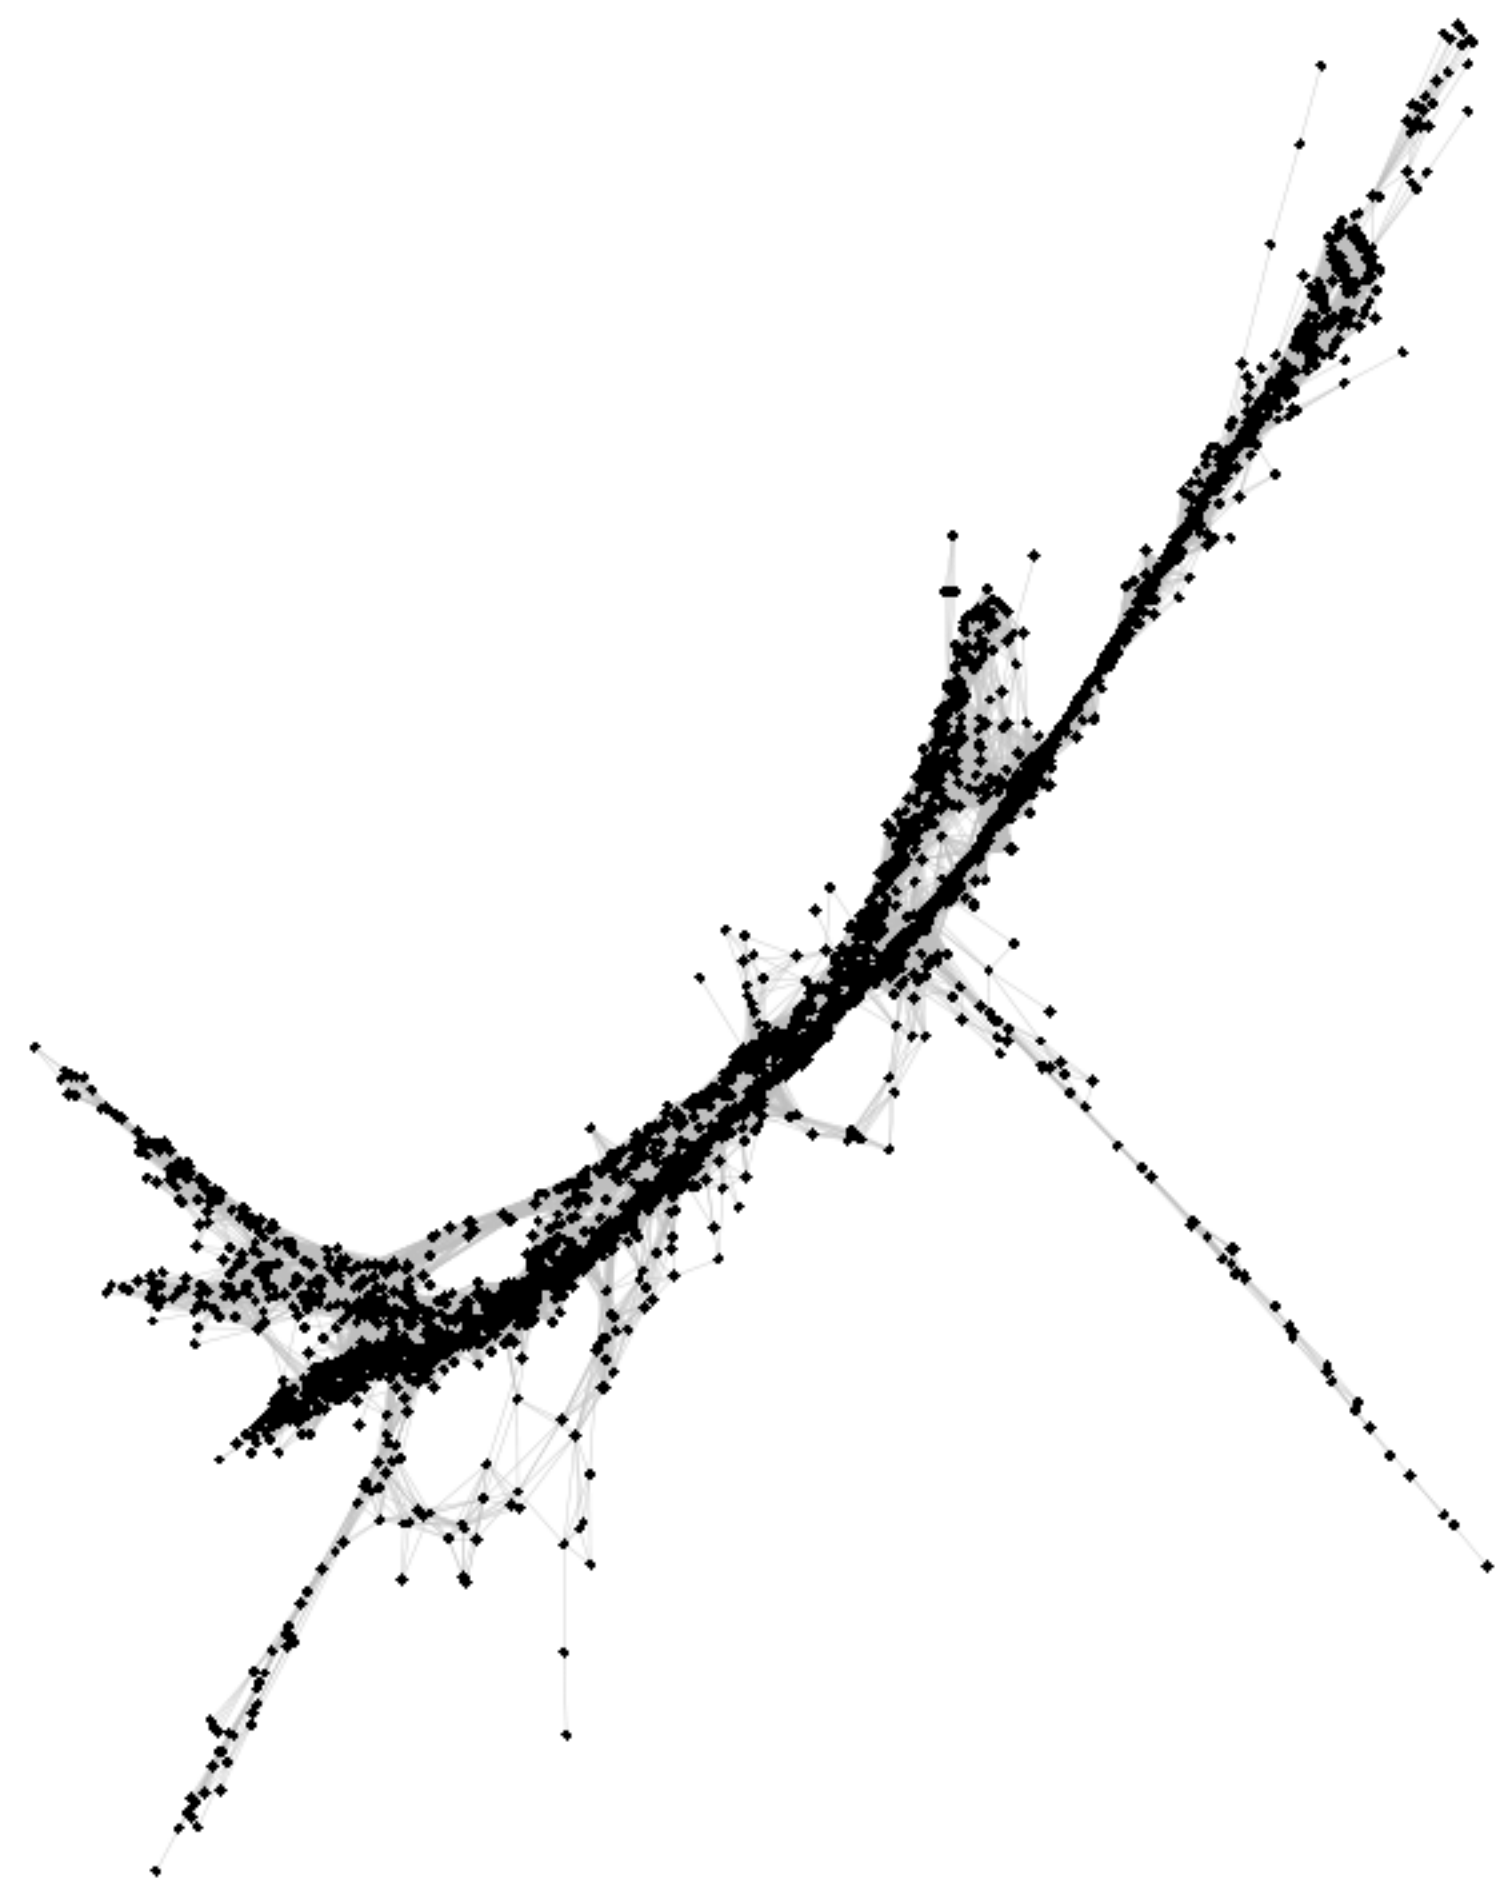

**CL97**

Number of reads: 3767  
Number of pairs: 246914  
Density: 0.03481  
Diameter: NA  
Mean edge weigth: 164.24  
Max. degree: 305

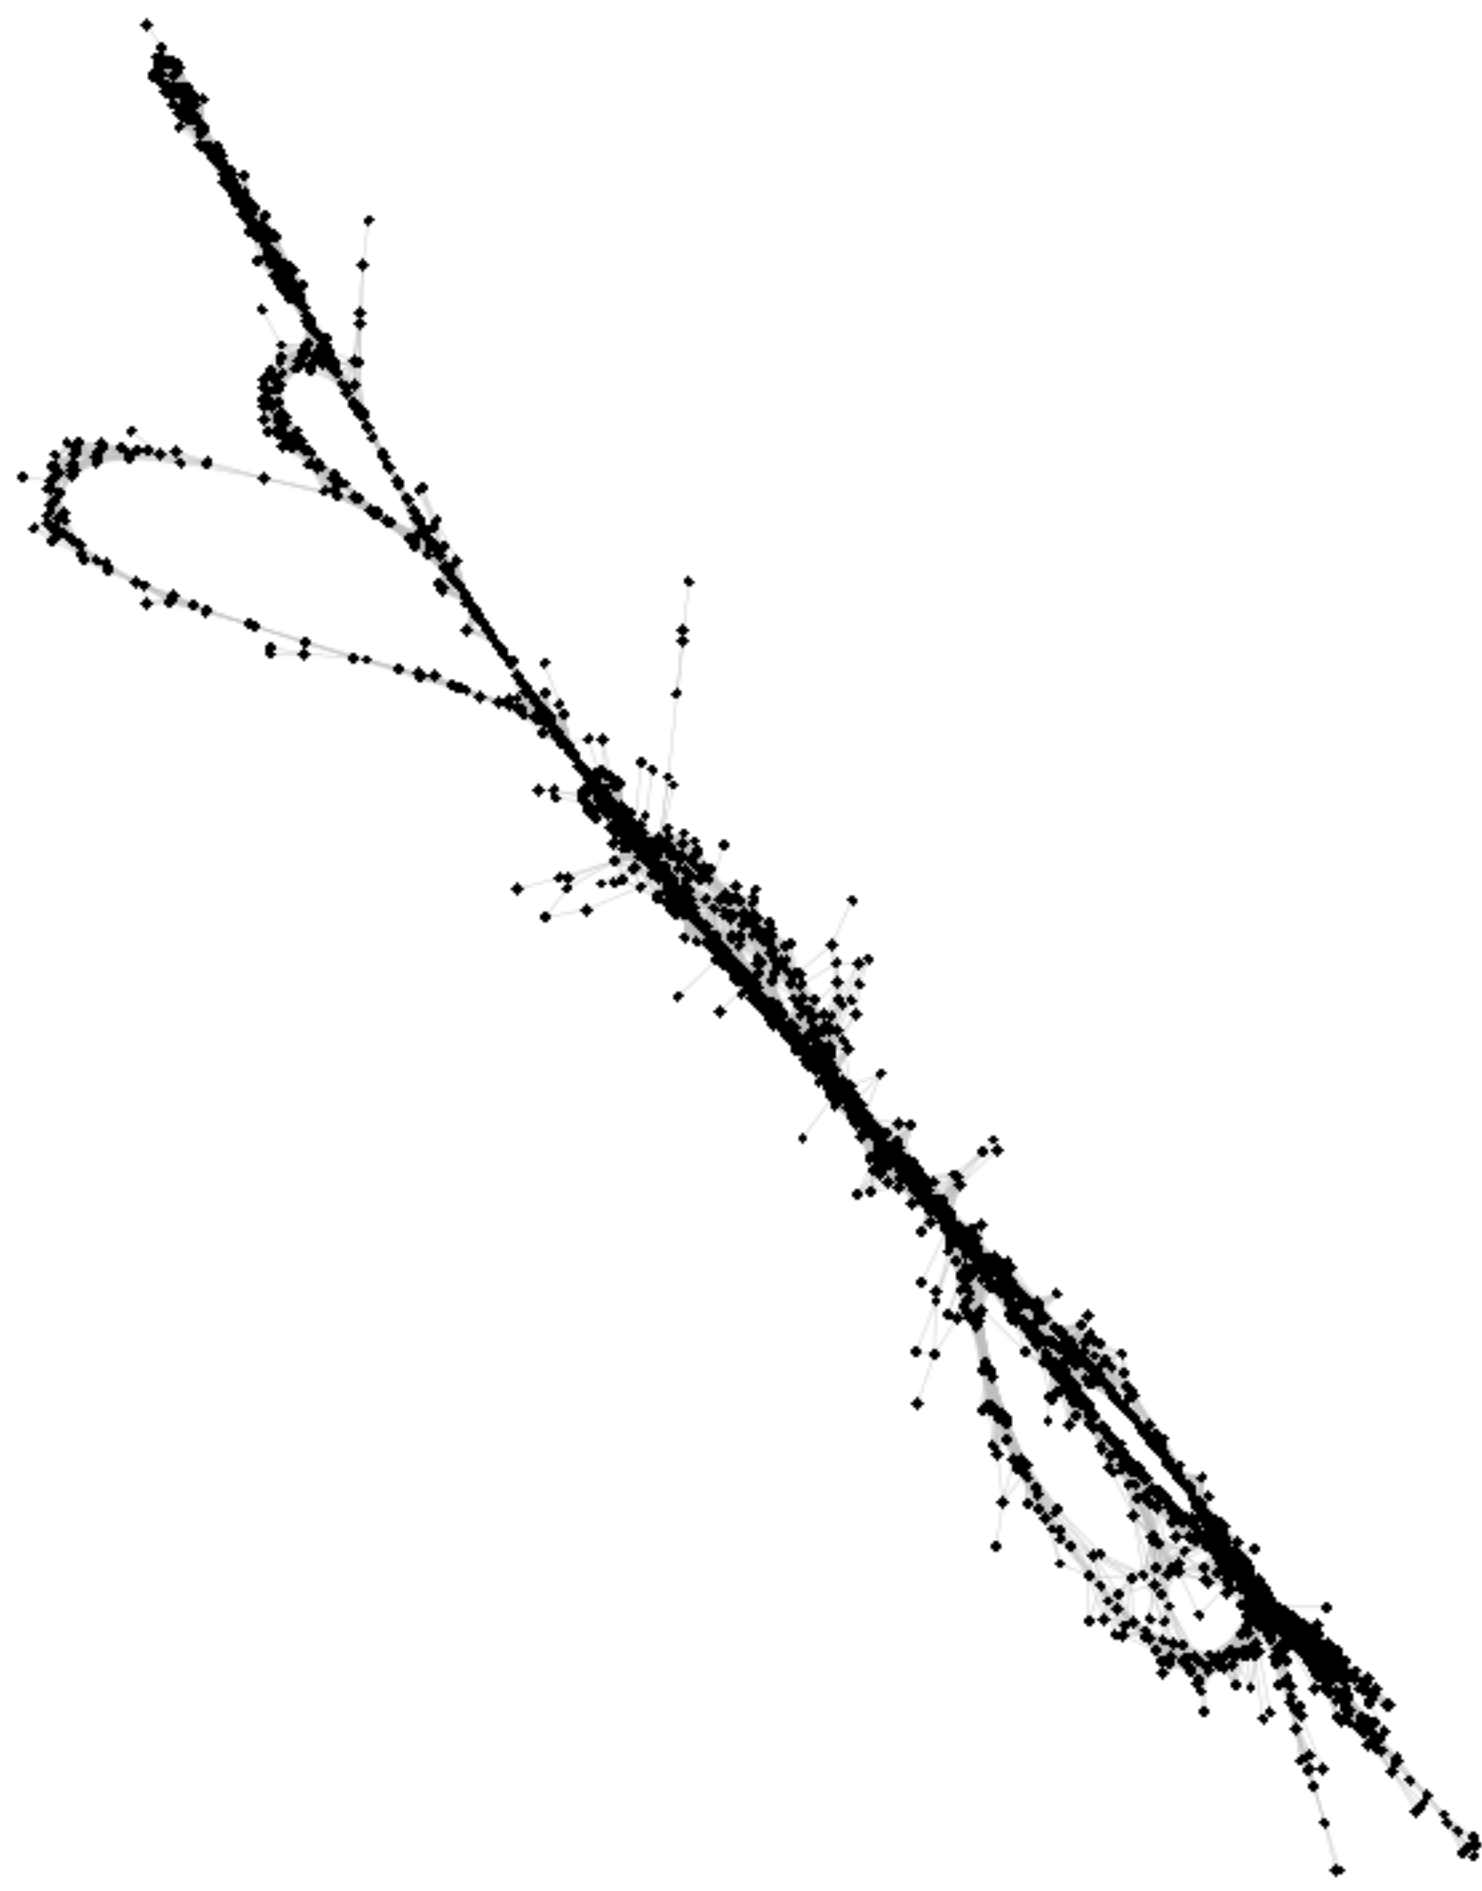

**CL98**

Number of reads: 3389  
Number of pairs: 157039  
Density: 0.02735  
Diameter: NA  
Mean edge weigth: 161.76  
Max. degree: 222

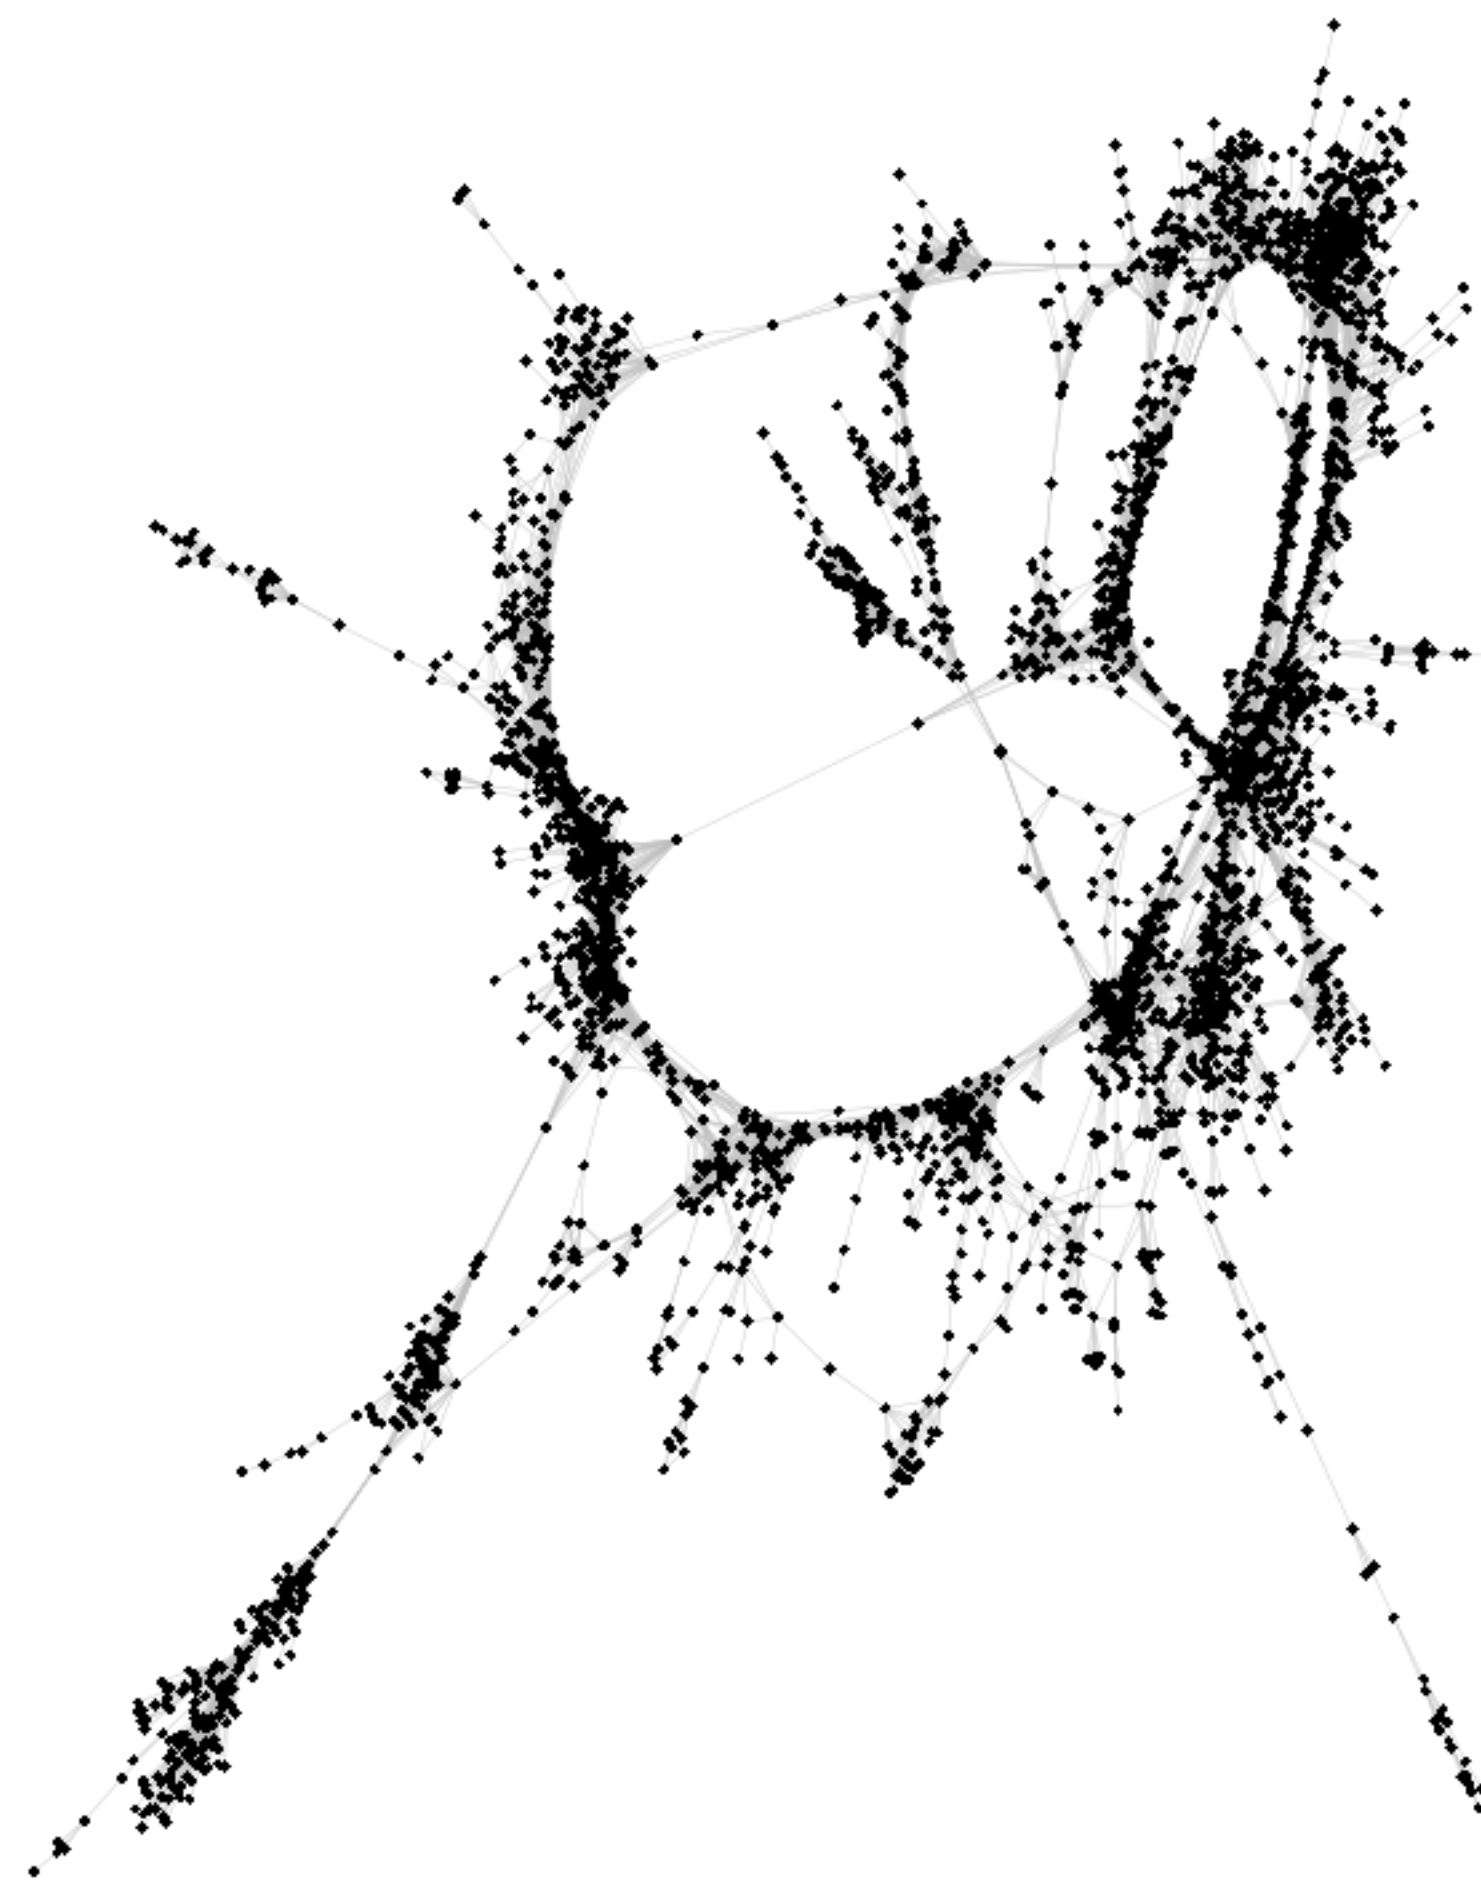

**CL99**

Number of reads: 3388  
Number of pairs: 32863  
Density: 0.005728  
Diameter: NA  
Mean edge weigth: 149.79  
Max. degree: 100

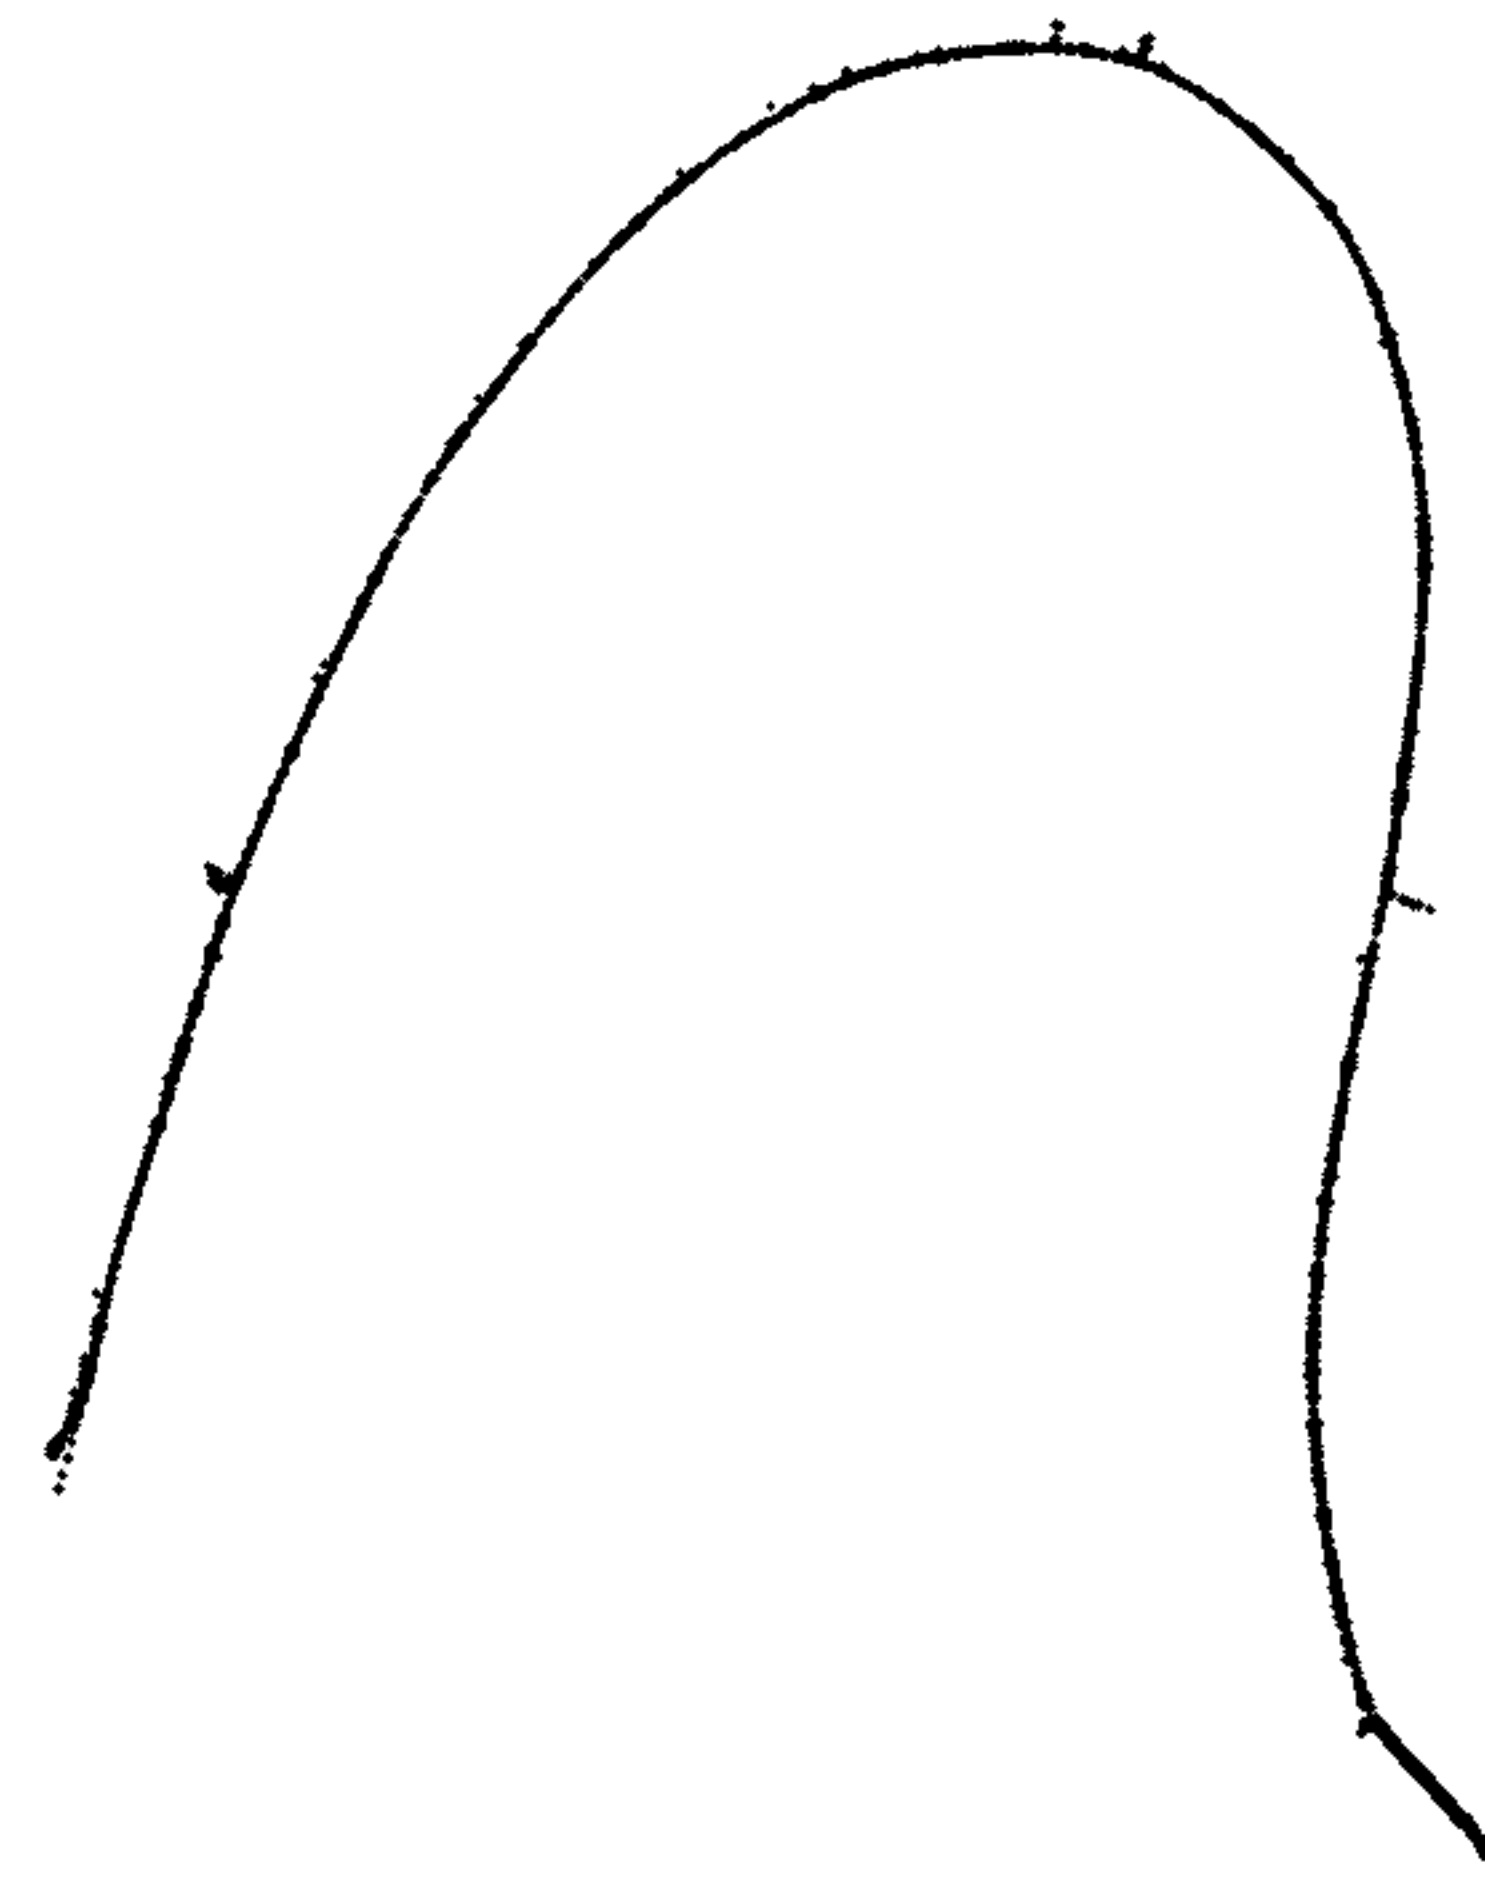

**CL100**

Number of reads: 3370  
Number of pairs: 48269  
Density: 0.008503  
Diameter: NA  
Mean edge weigth: 214.23  
Max. degree: 48

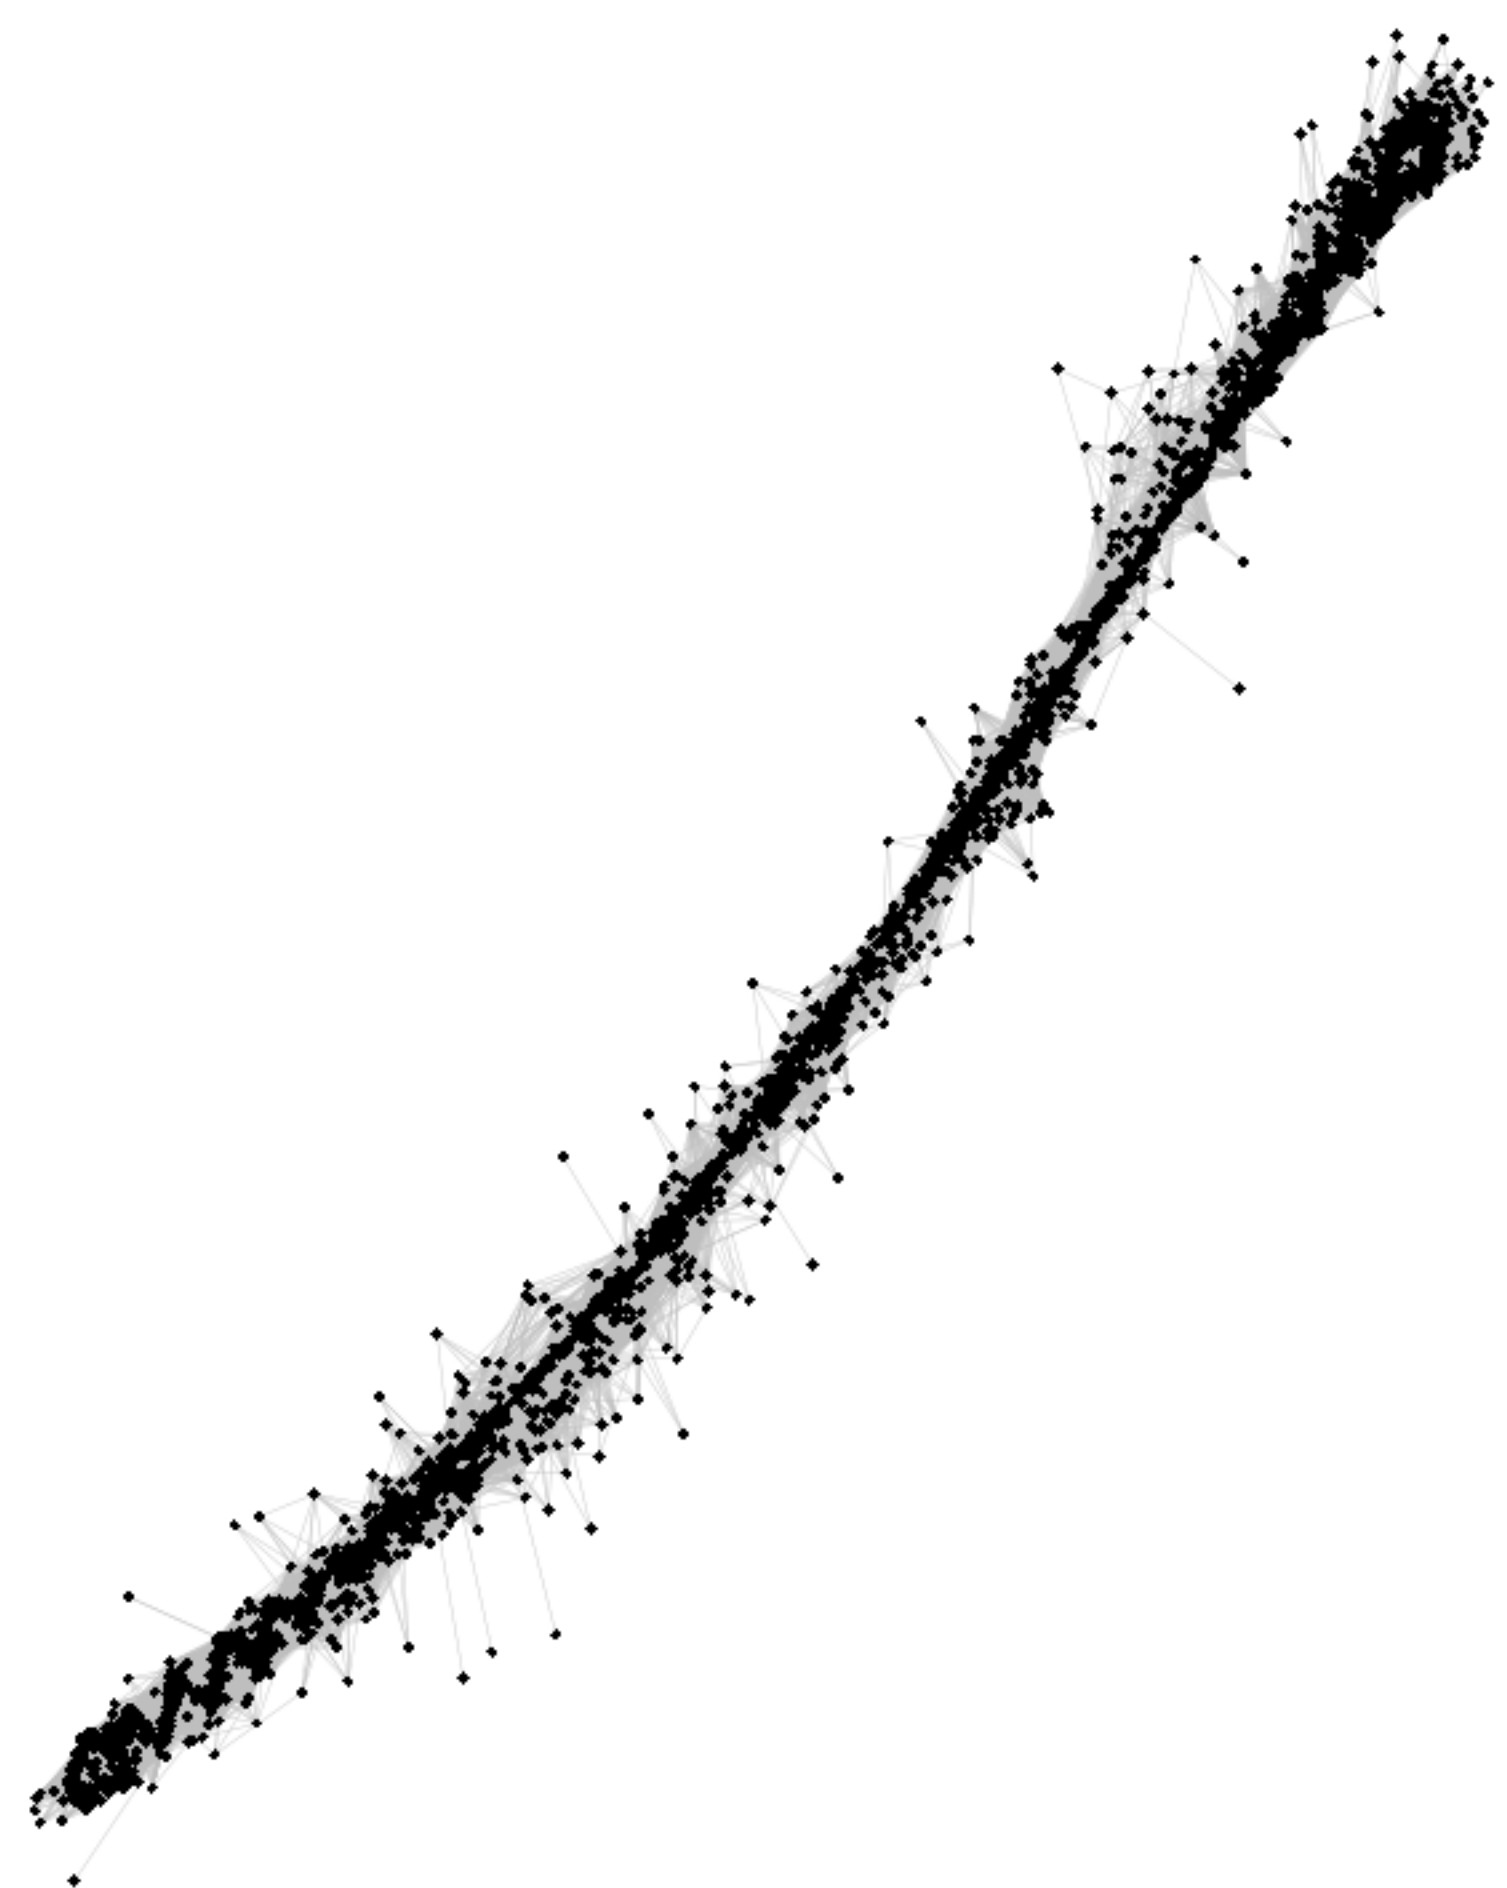

**CL101**

Number of reads: 3249  
Number of pairs: 298541  
Density: 0.05658  
Diameter: NA  
Mean edge weigth: 163.57  
Max. degree: 327

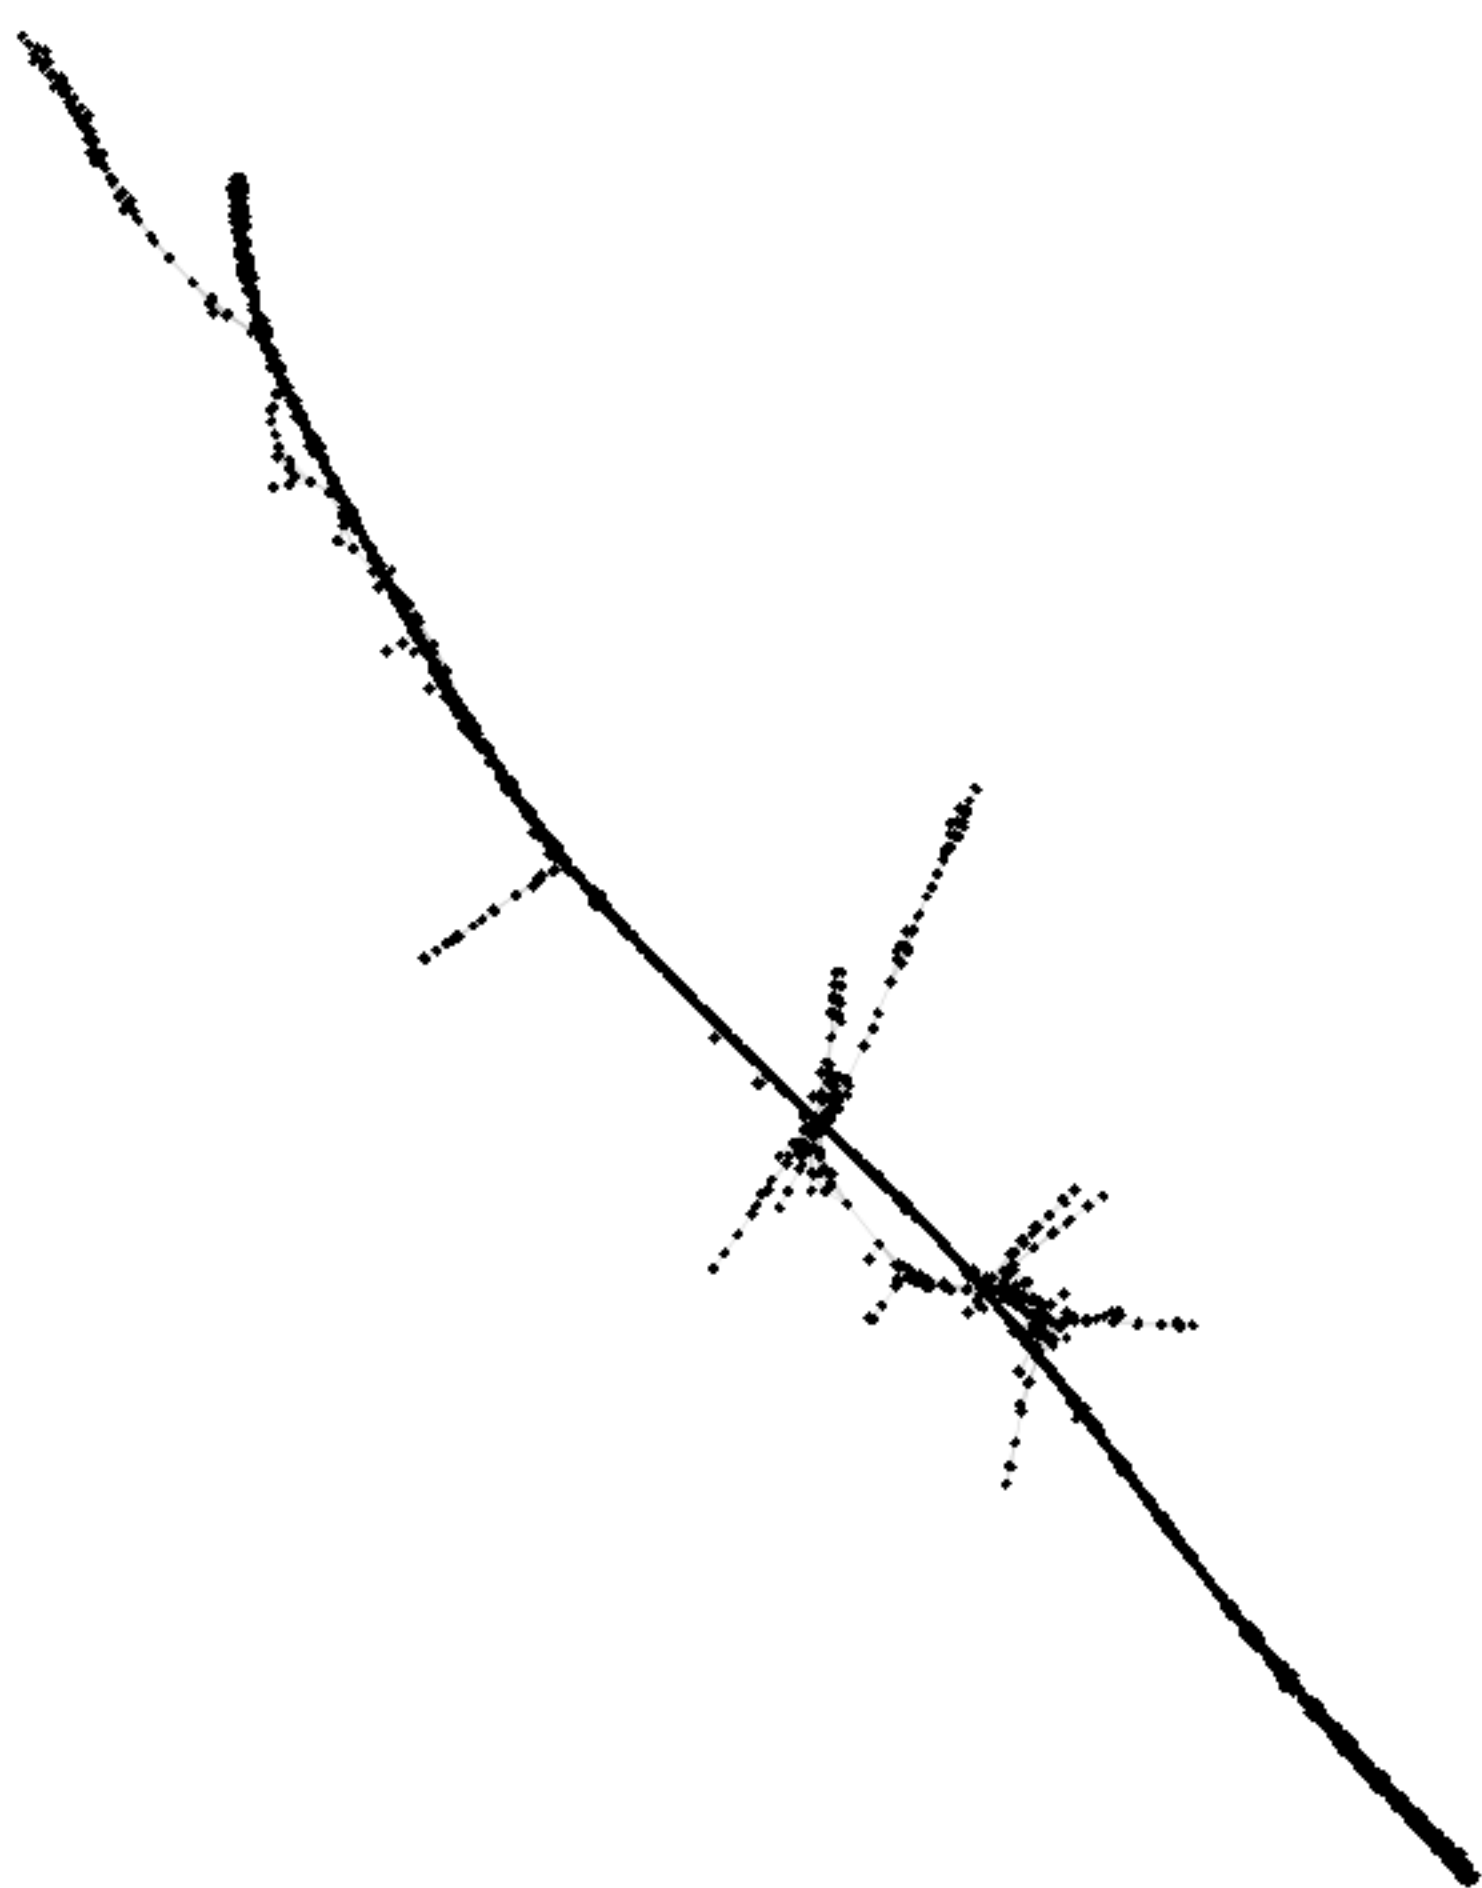

**CL102**

Number of reads: 3075  
Number of pairs: 83174  
Density: 0.0176  
Diameter: NA  
Mean edge weigth: 212.38  
Max. degree: 91

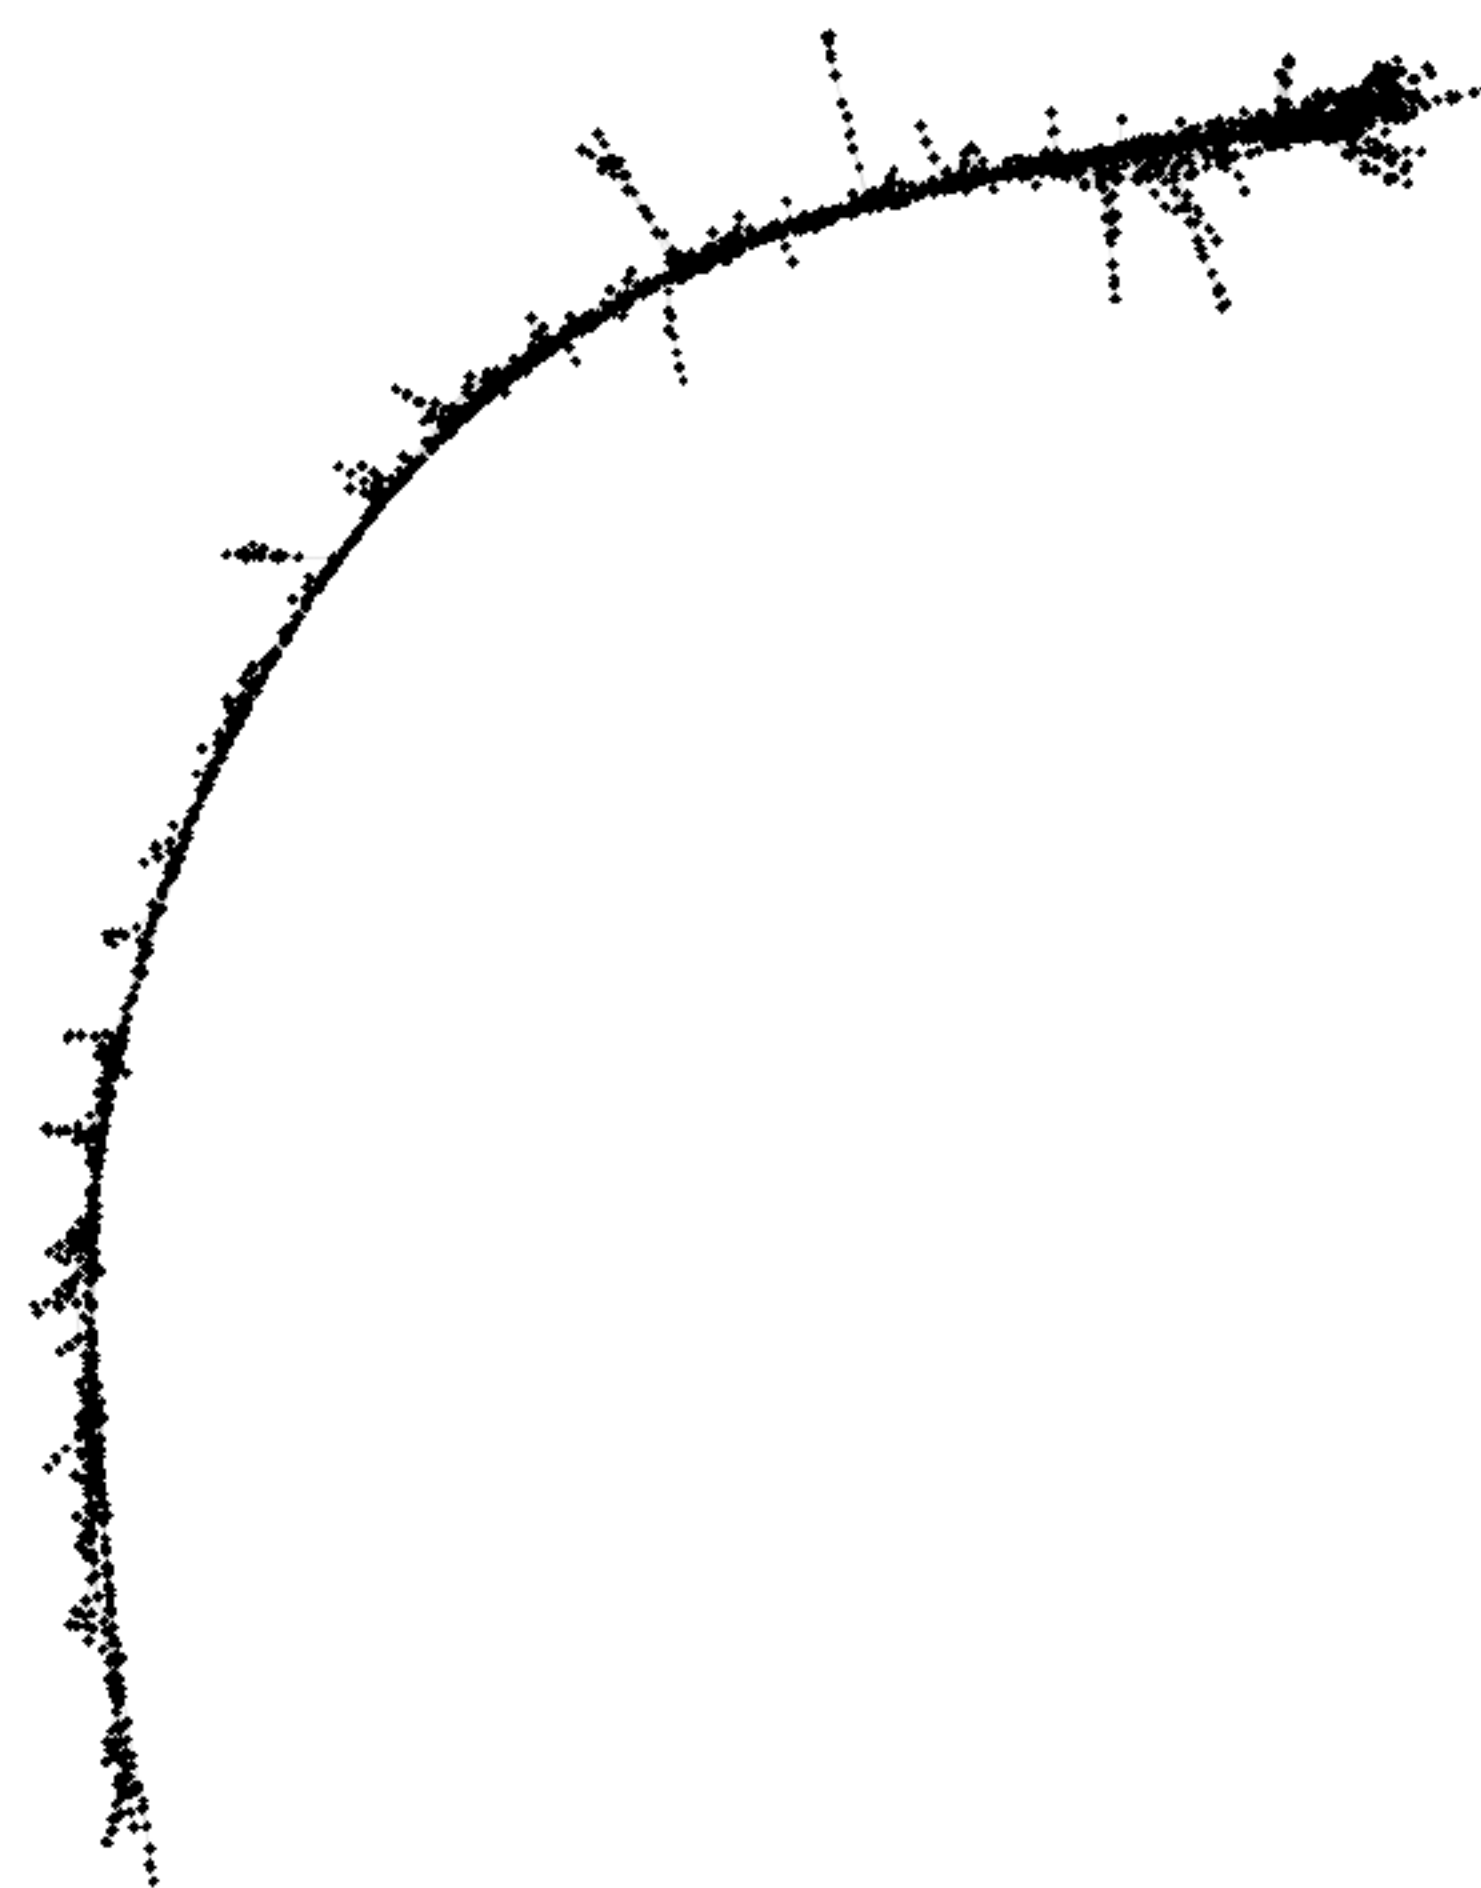

**CL103**

Number of reads: 2759  
Number of pairs: 43696  
Density: 0.01148  
Diameter: NA  
Mean edge weigth: 159.75  
Max. degree: 96

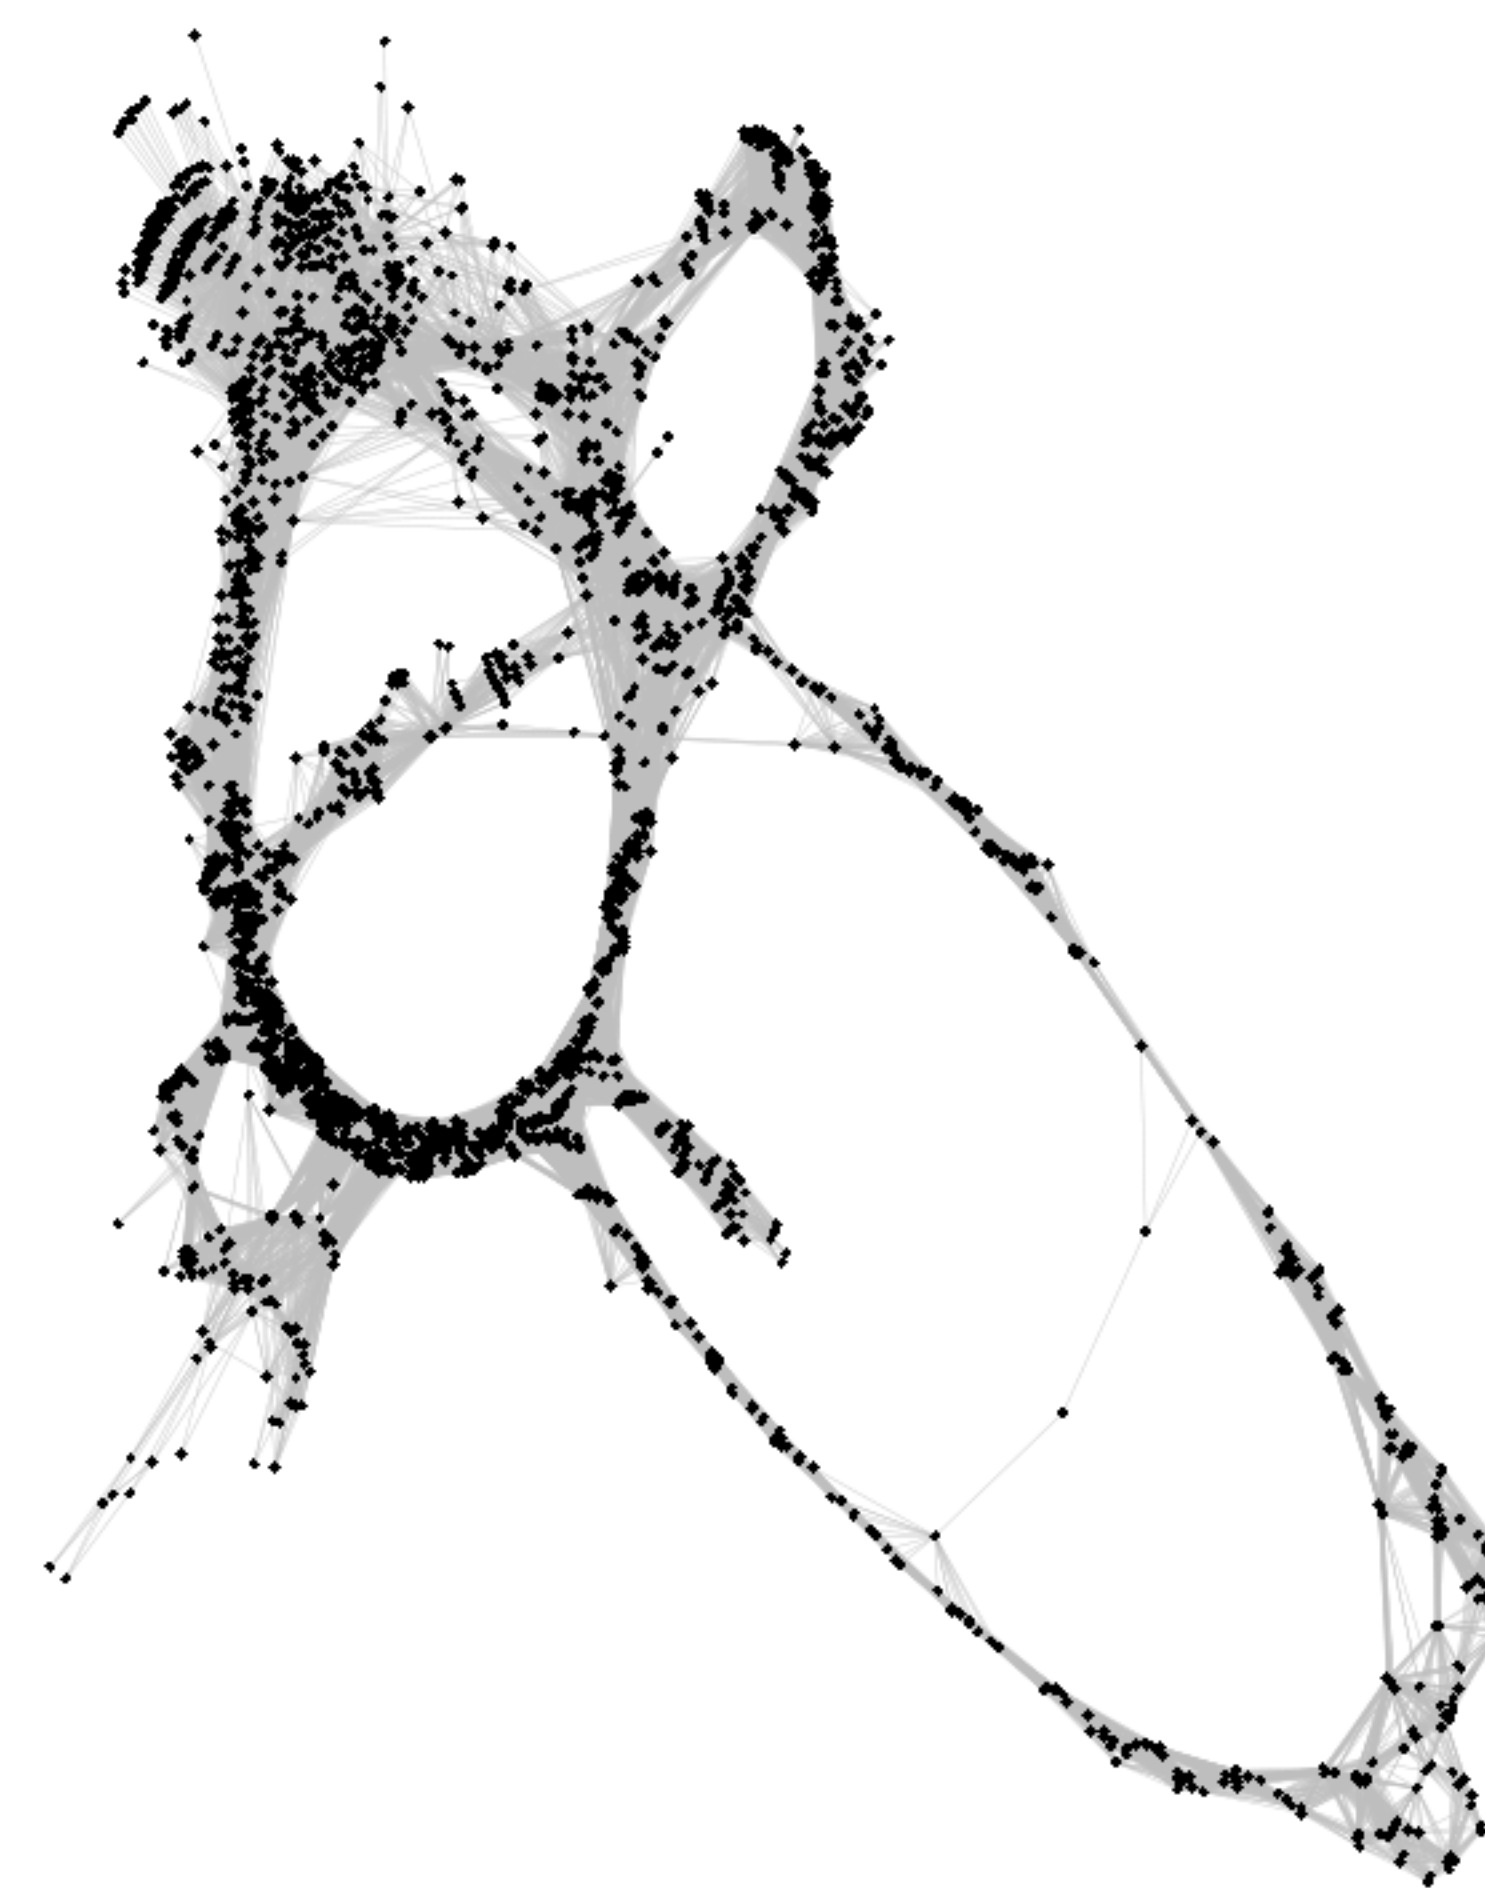

**CL104**

Number of reads: 2749  
Number of pairs: 135405  
Density: 0.03585  
Diameter: NA  
Mean edge weigth: 197.43  
Max. degree: 383

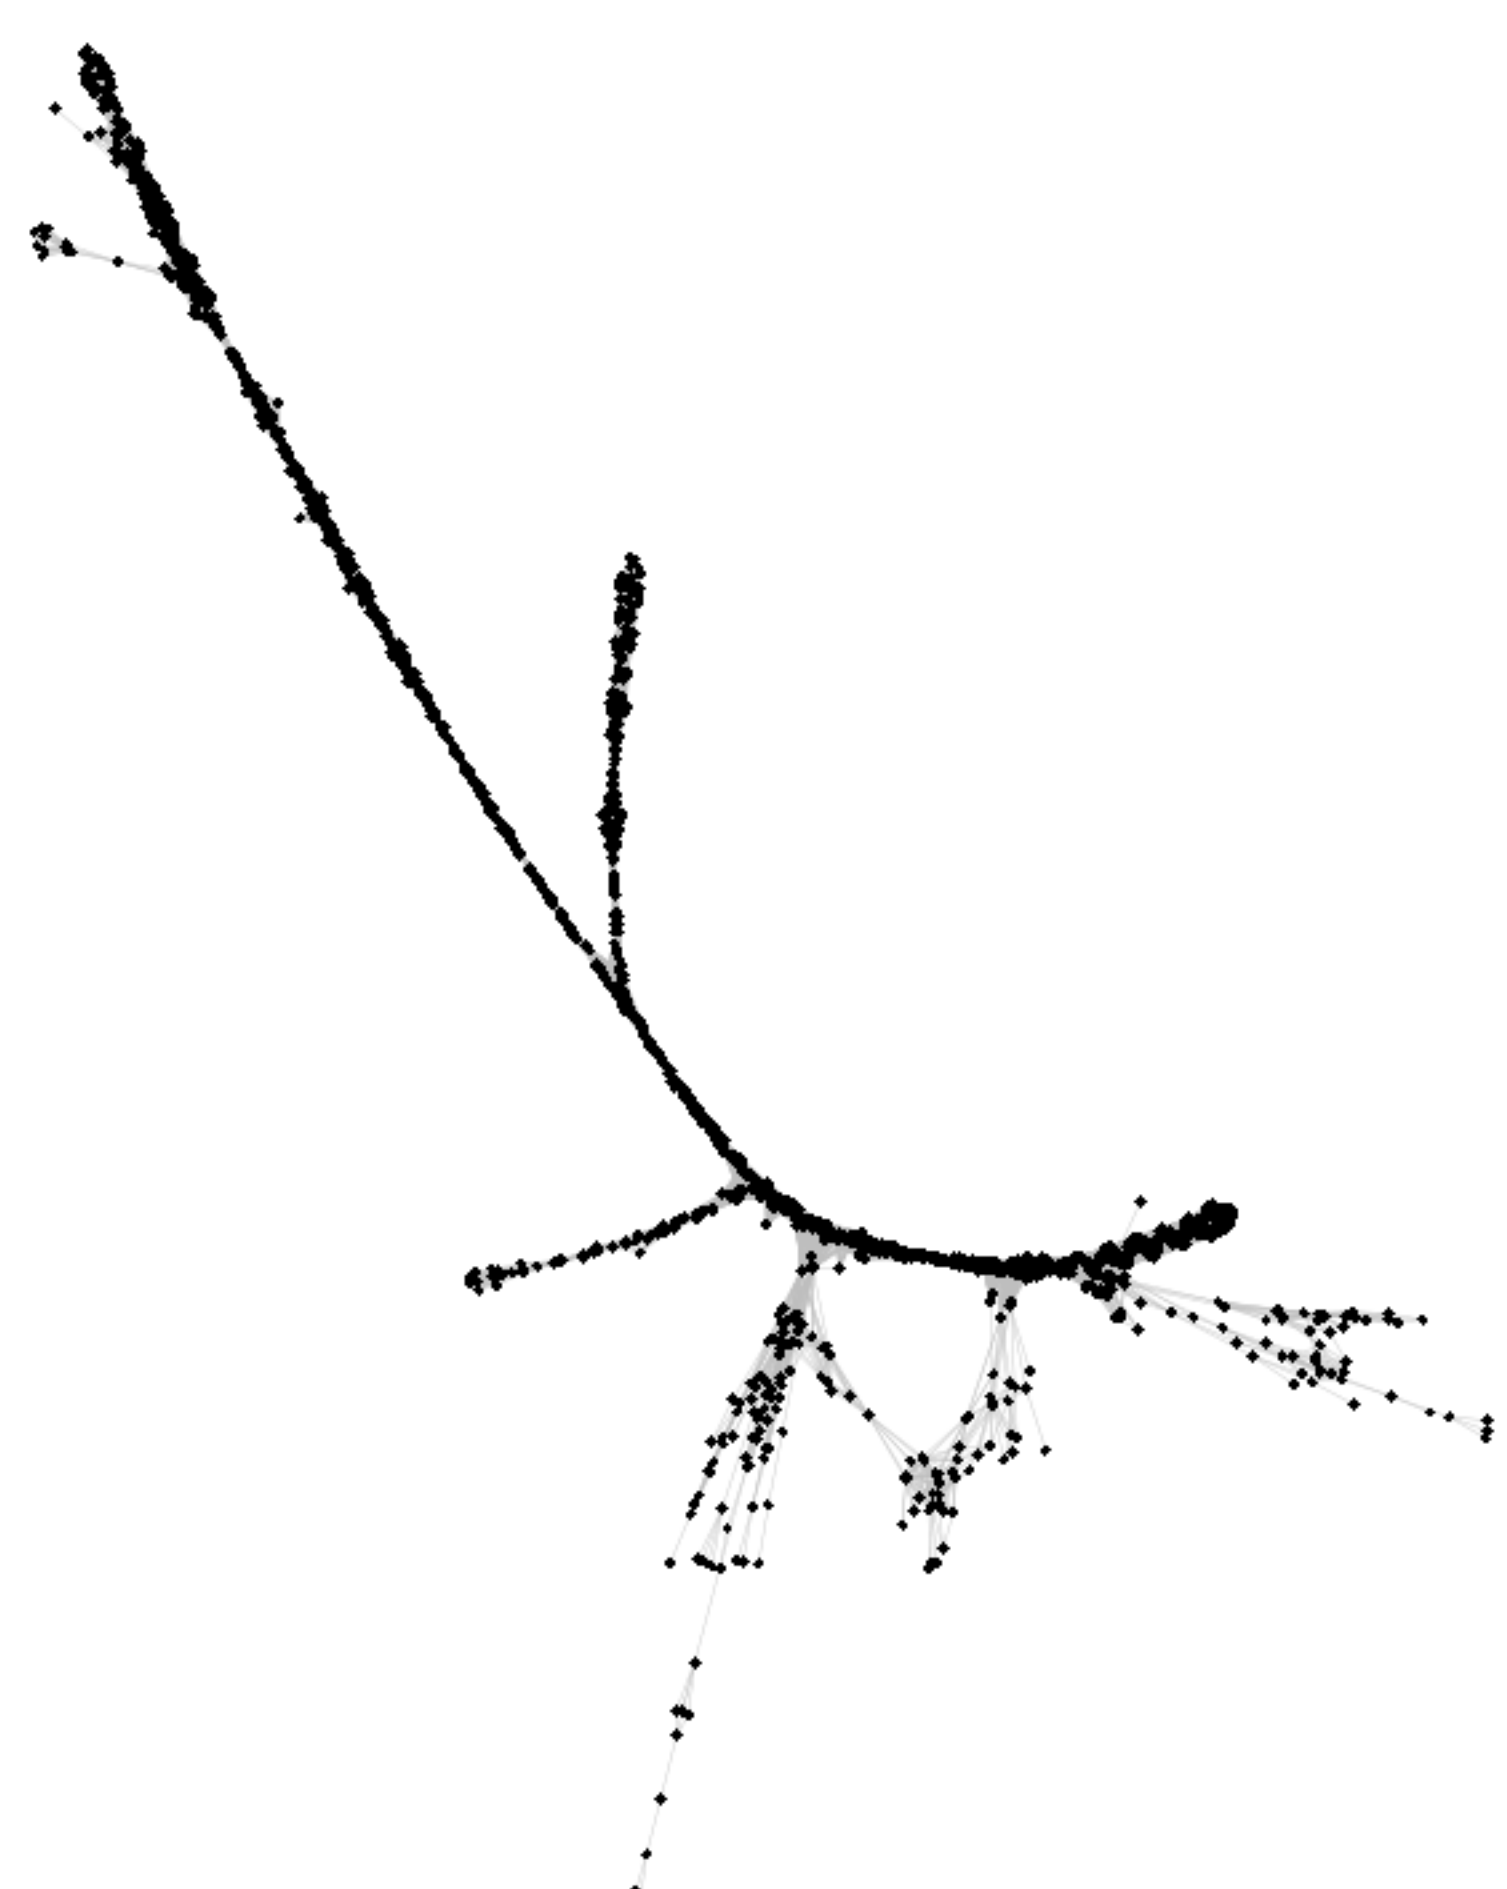

**CL105**

Number of reads: 2307  
Number of pairs: 105684  
Density: 0.03973  
Diameter: NA  
Mean edge weigth: 208.5  
Max. degree: 180

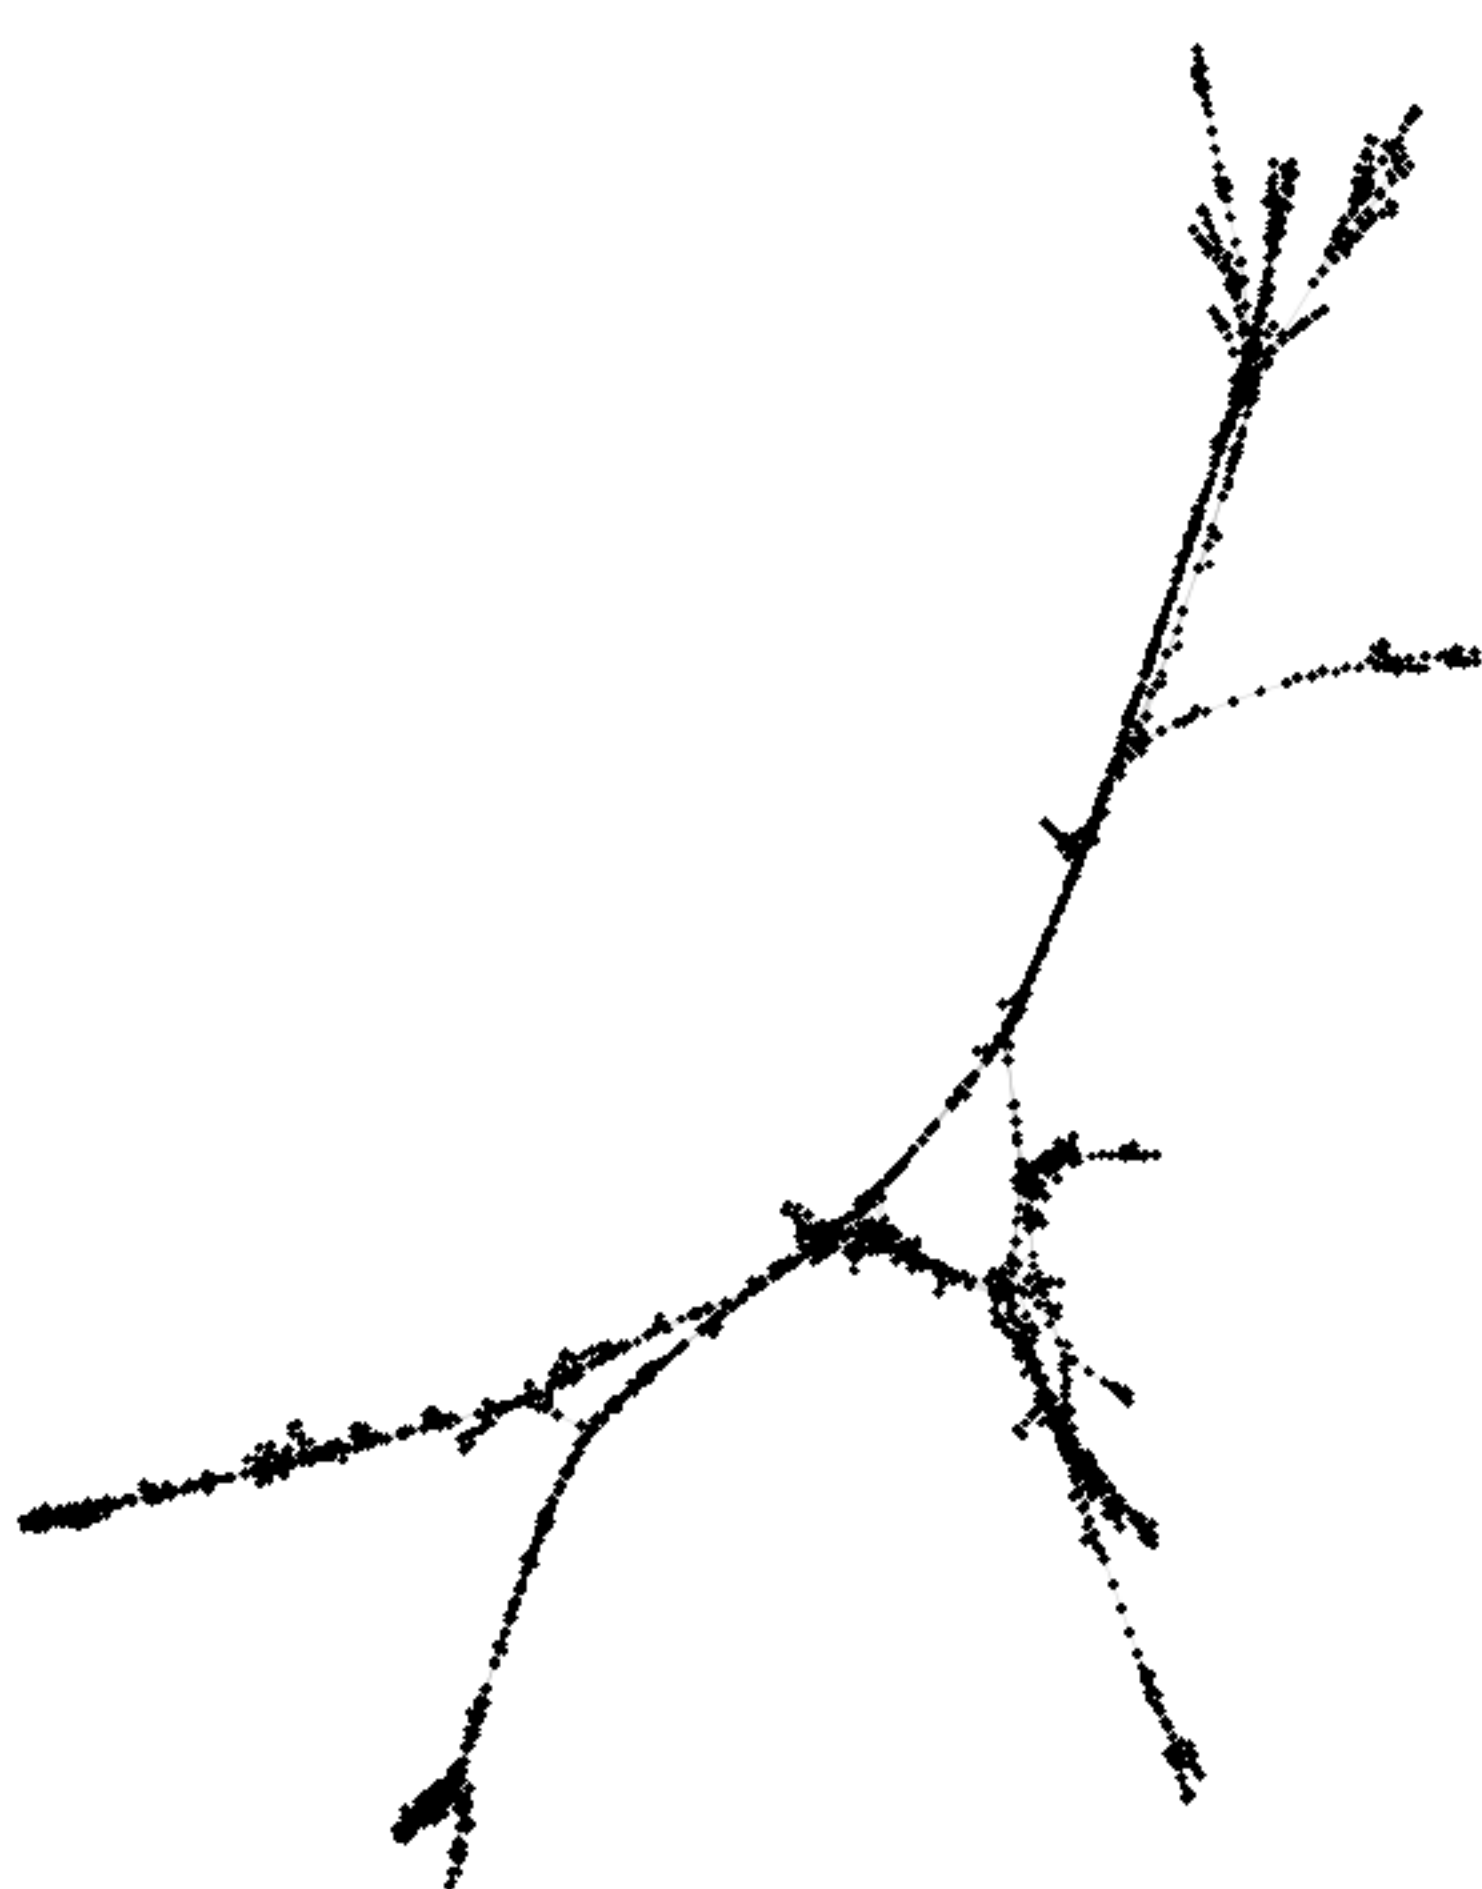

**CL106**

Number of reads: 2253  
Number of pairs: 17337  
Density: 0.006834  
Diameter: NA  
Mean edge weigth: 164.84  
Max. degree: 72

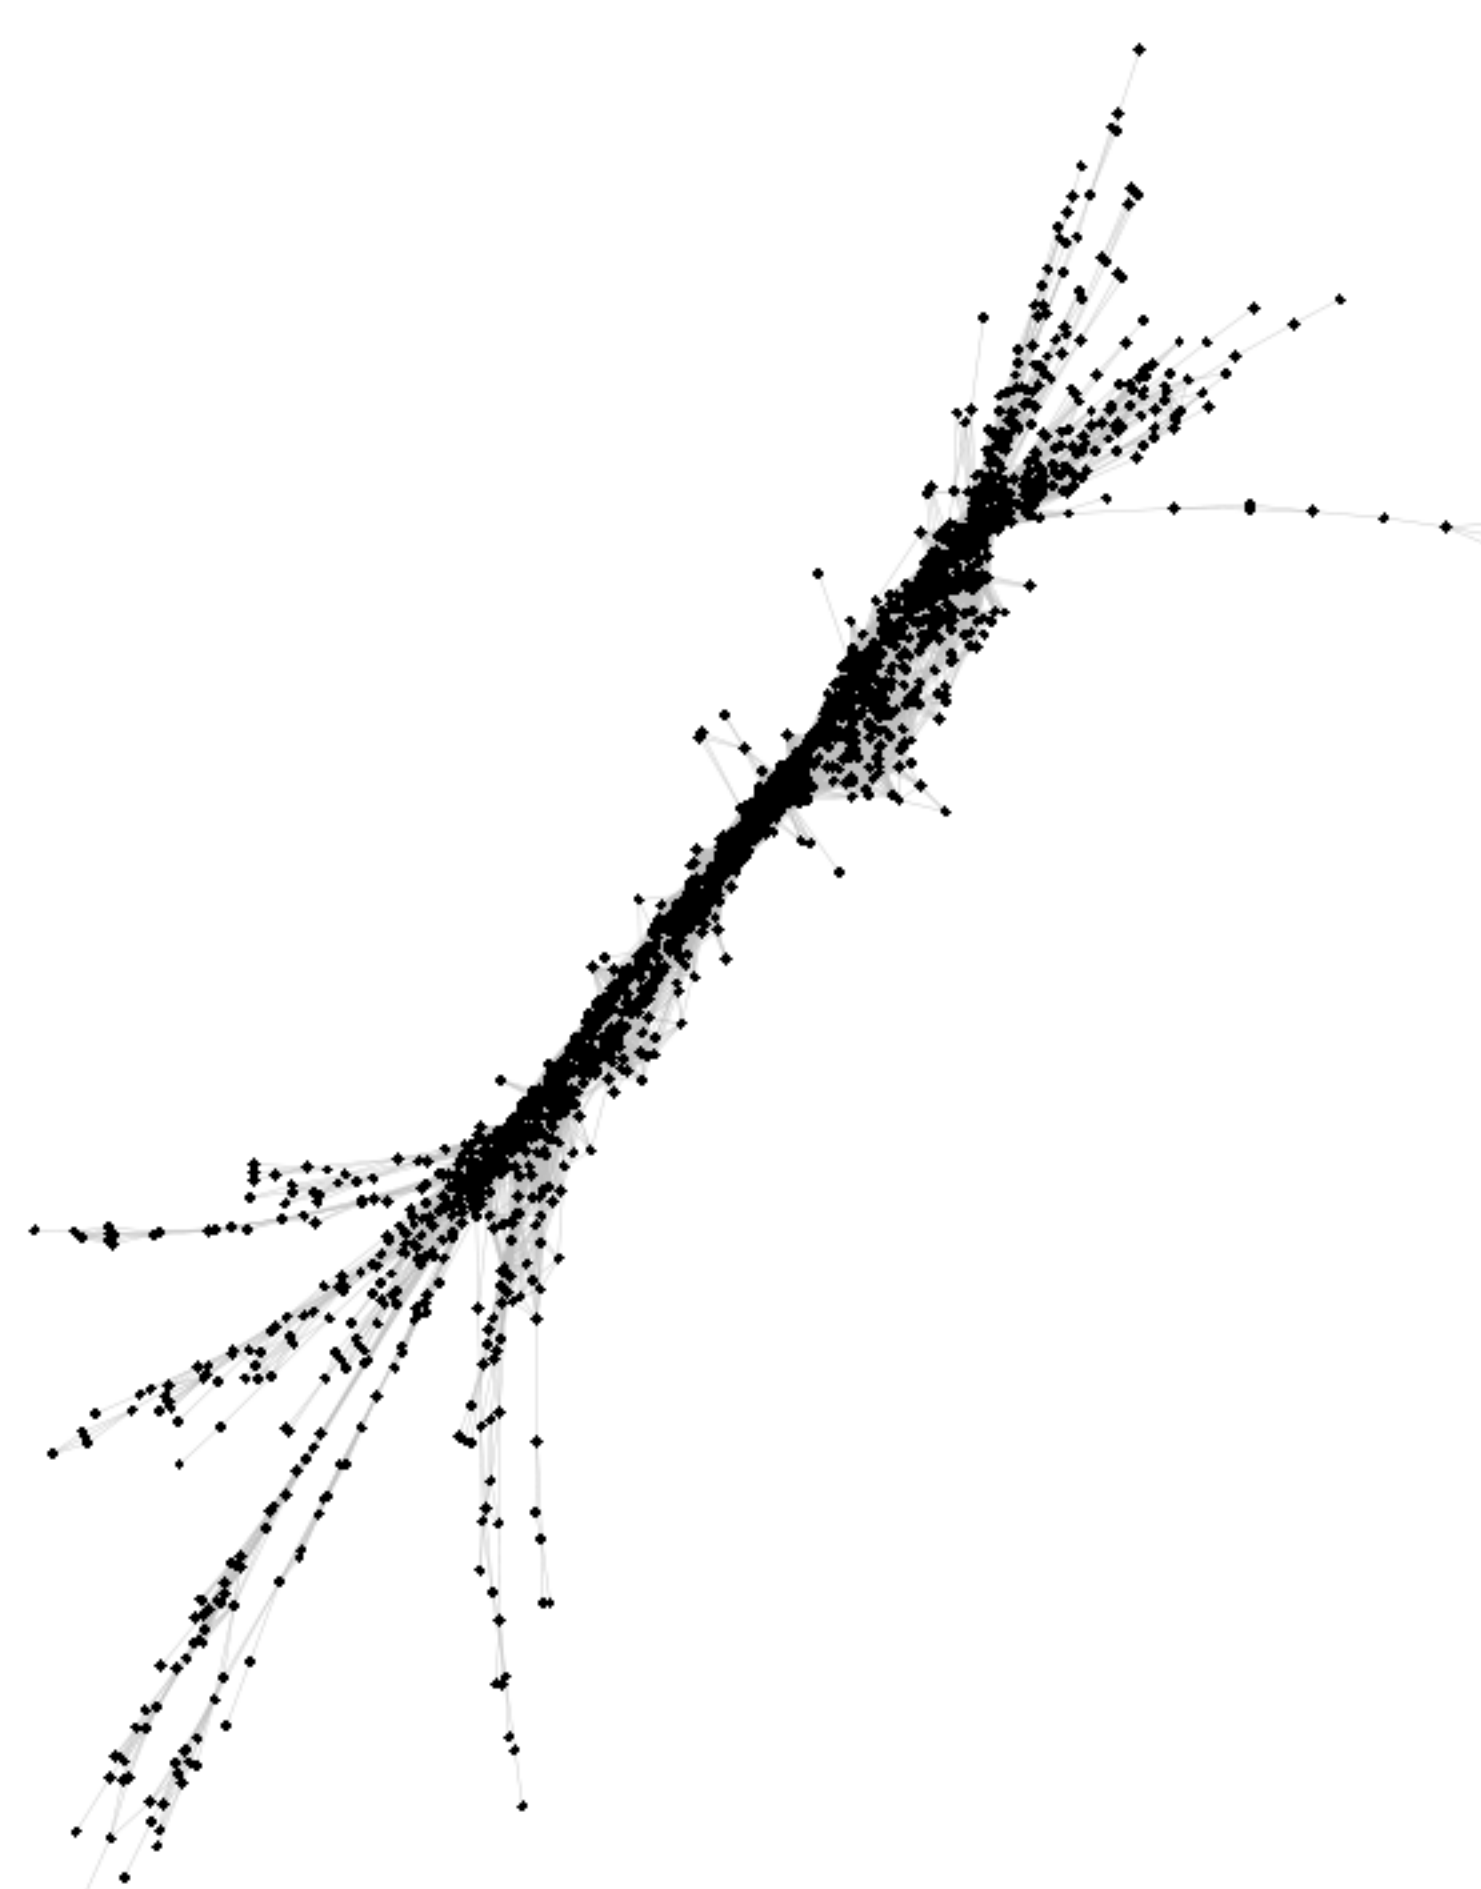

**CL107**

Number of reads: 2252  
Number of pairs: 110889  
Density: 0.04375  
Diameter: NA  
Mean edge weigth: 158.12  
Max. degree: 268

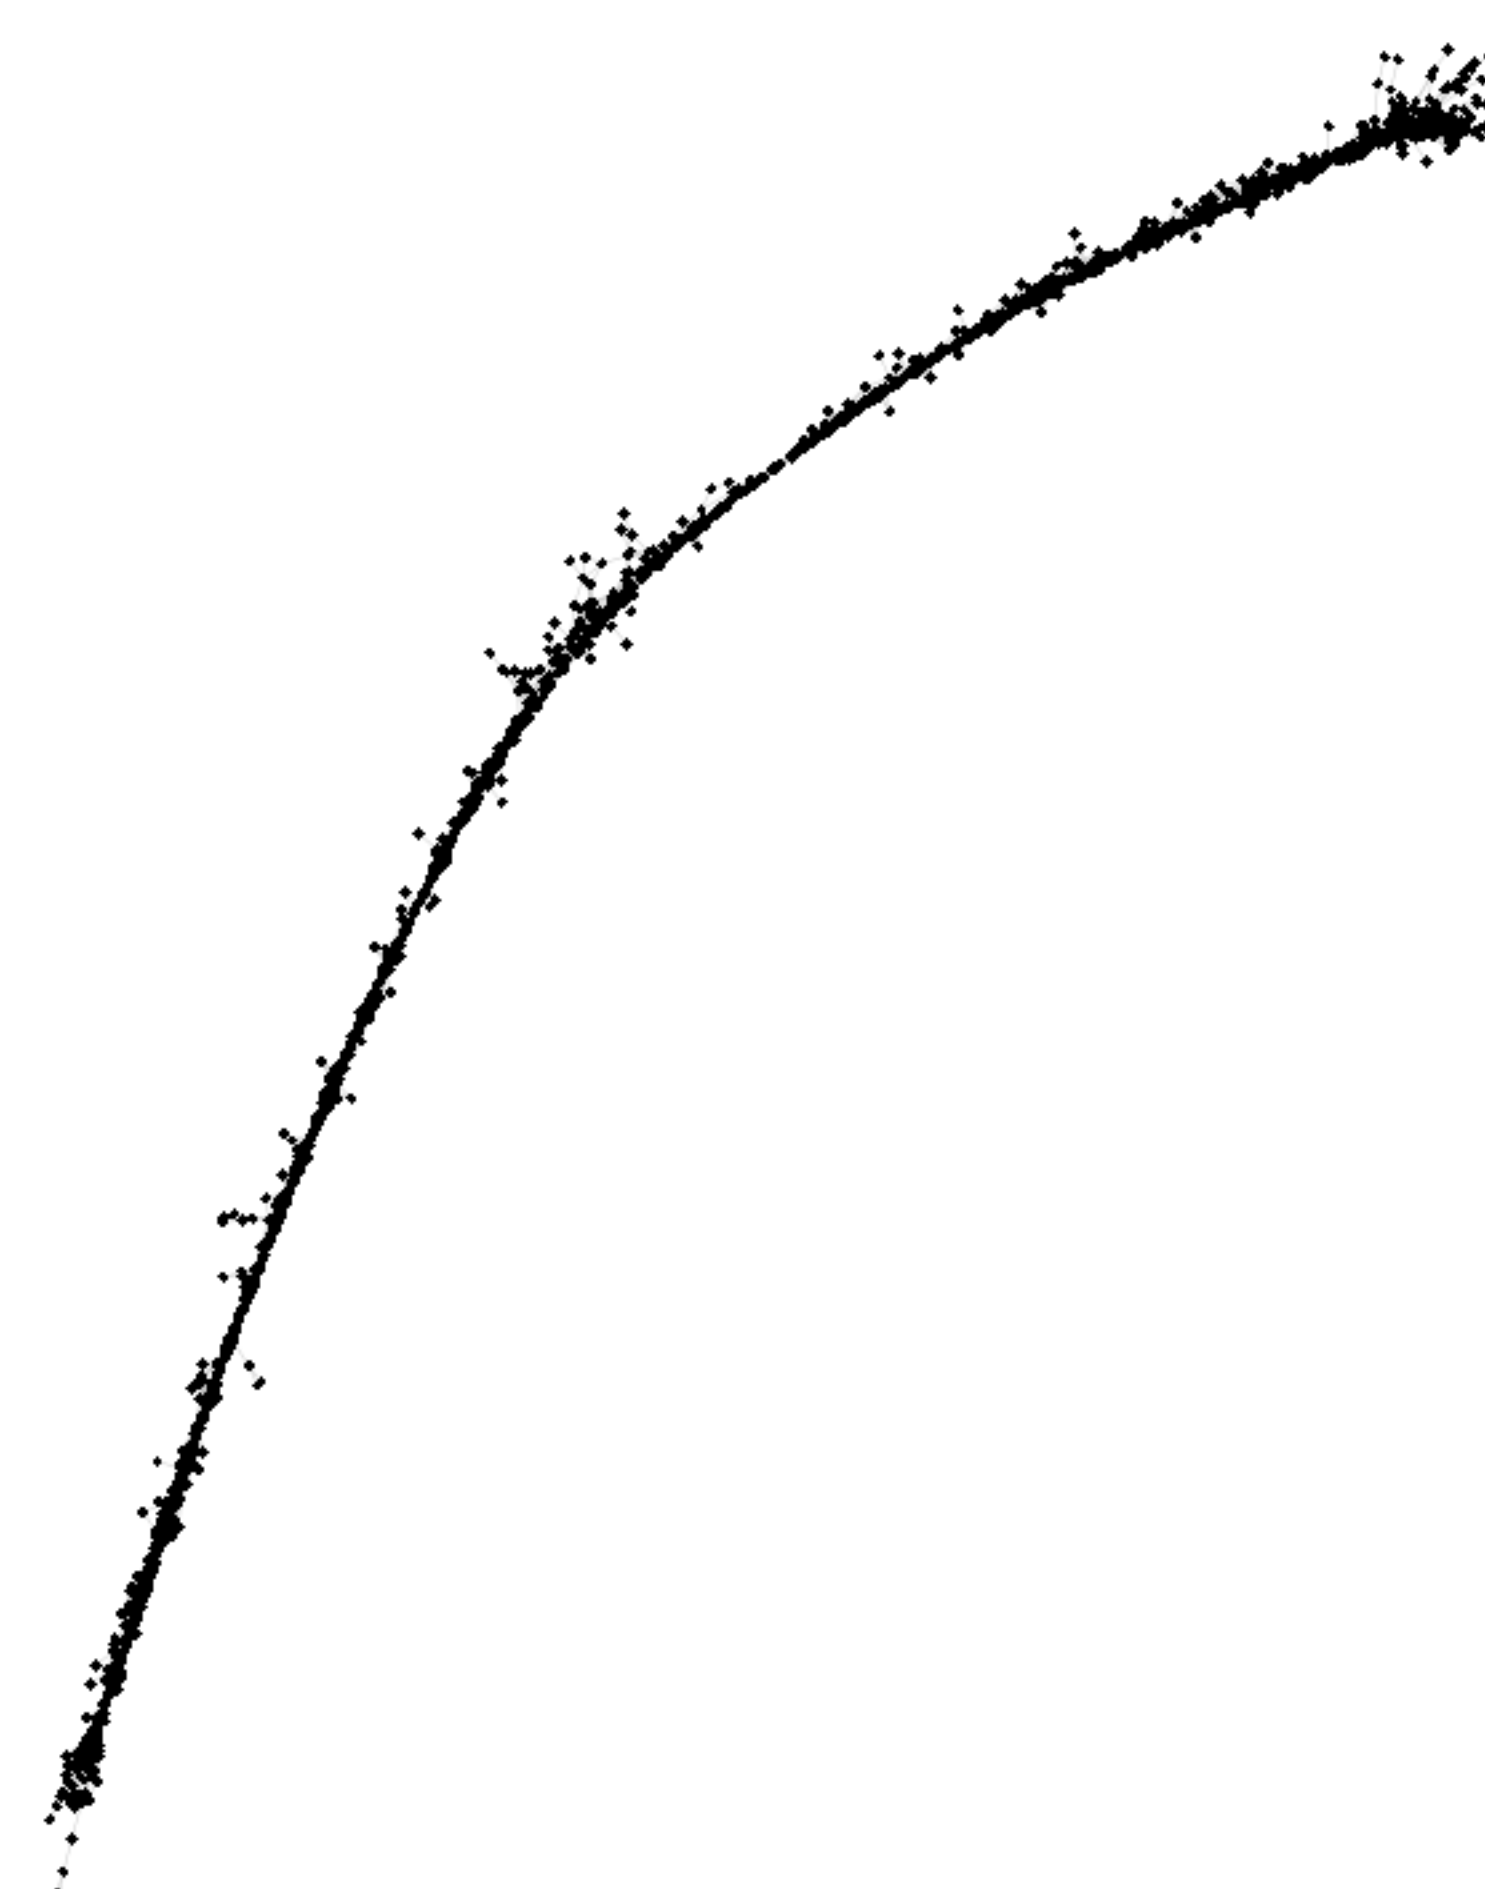

**CL108**

Number of reads: 2155  
Number of pairs: 47036  
Density: 0.02027  
Diameter: NA  
Mean edge weigth: 175  
Max. degree: 98

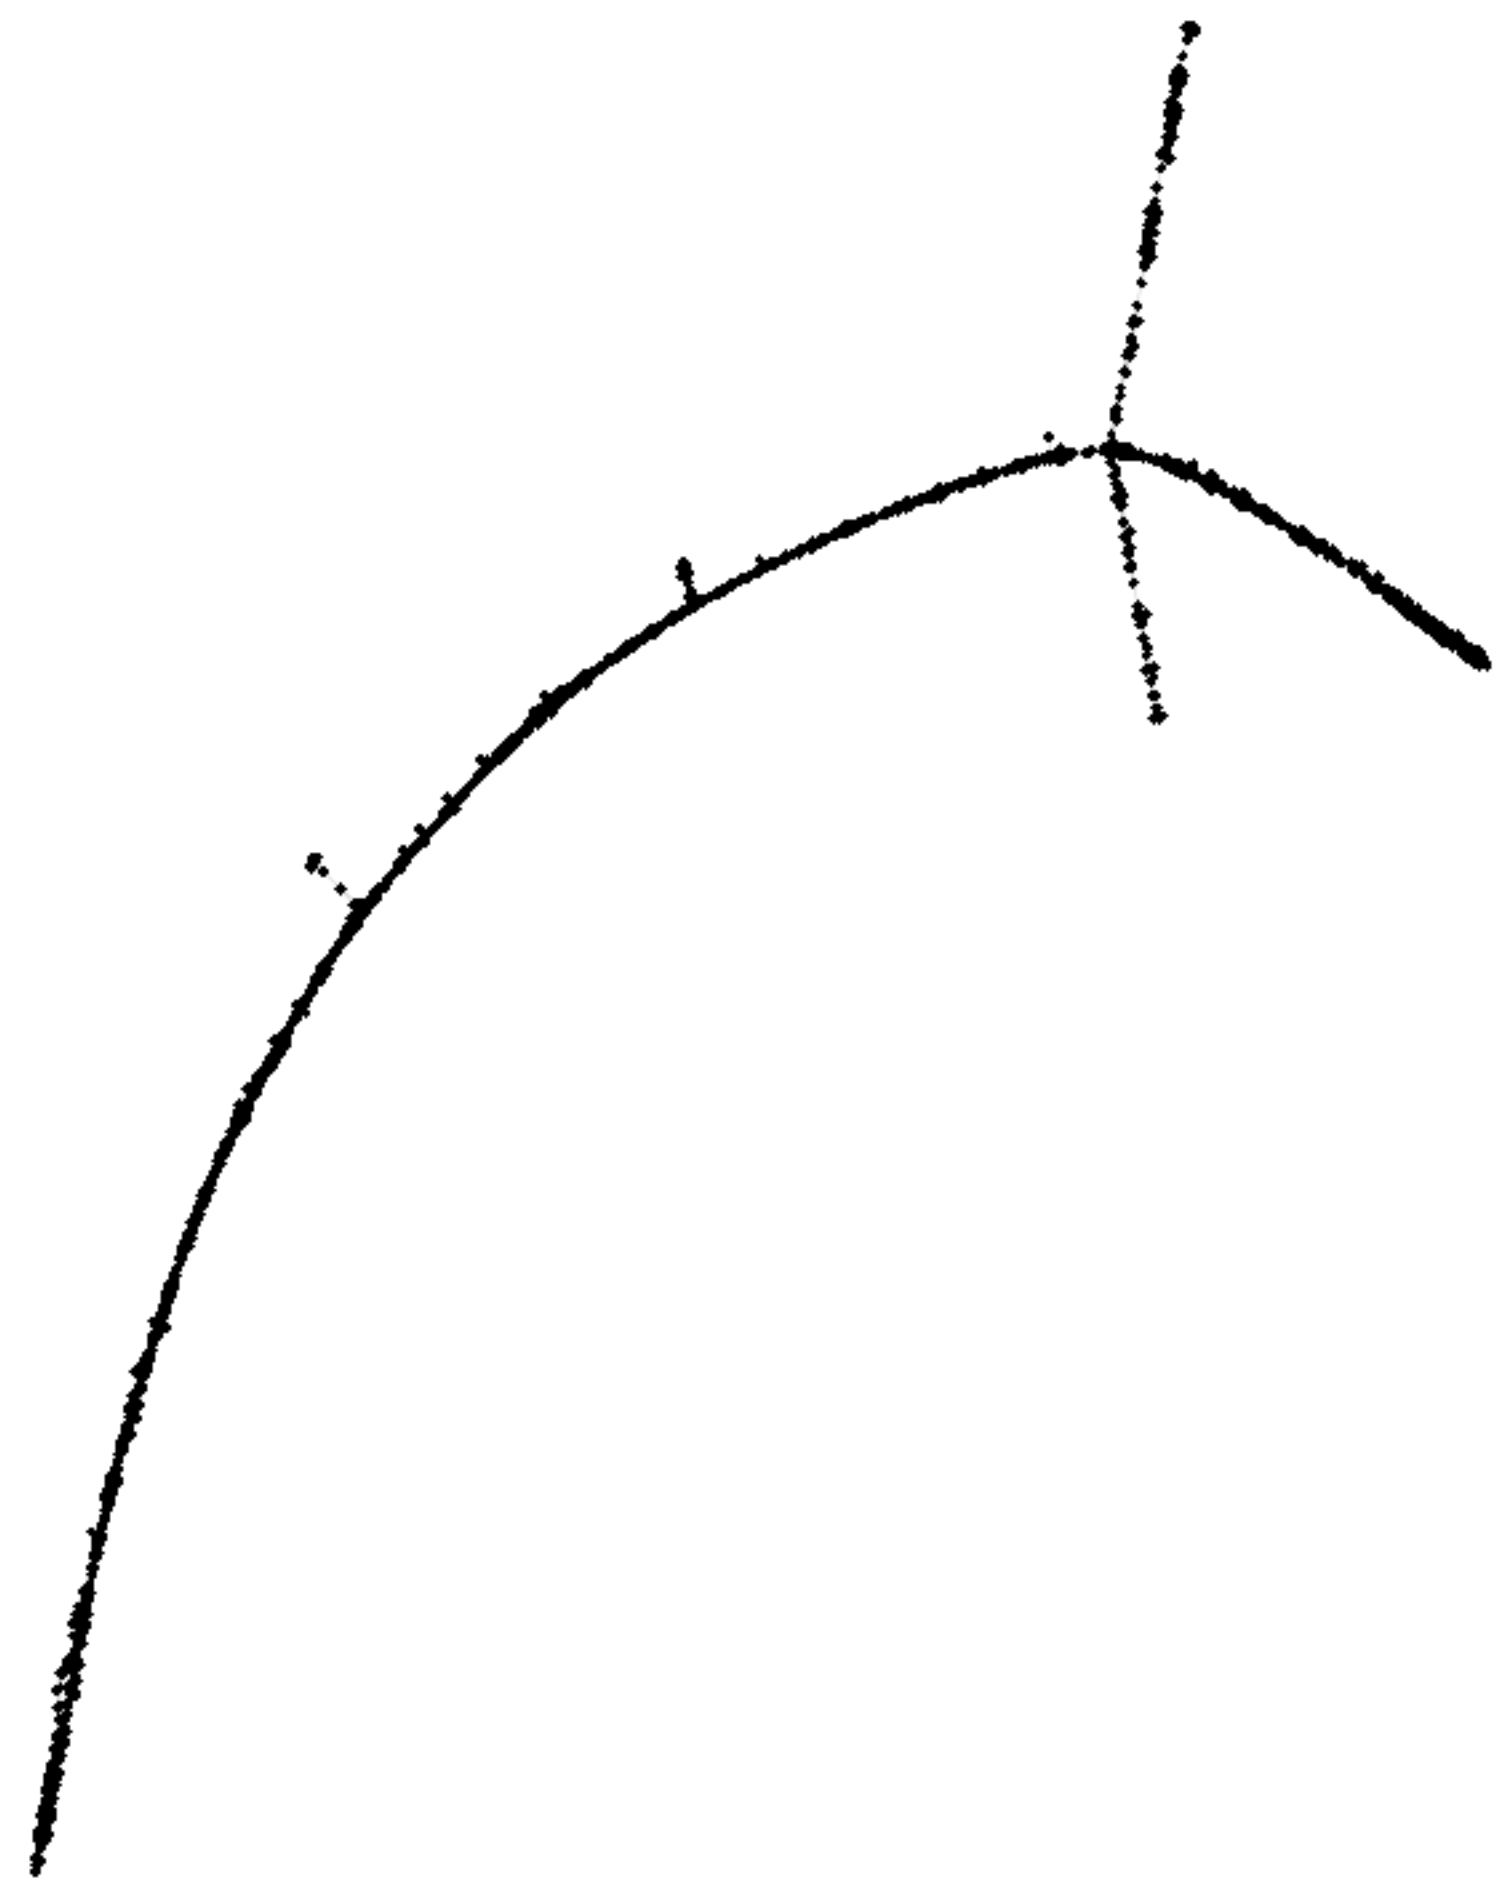

**CL109**

Number of reads: 2111  
Number of pairs: 30967  
Density: 0.0139  
Diameter: NA  
Mean edge weight: 208.56  
Max. degree: 49

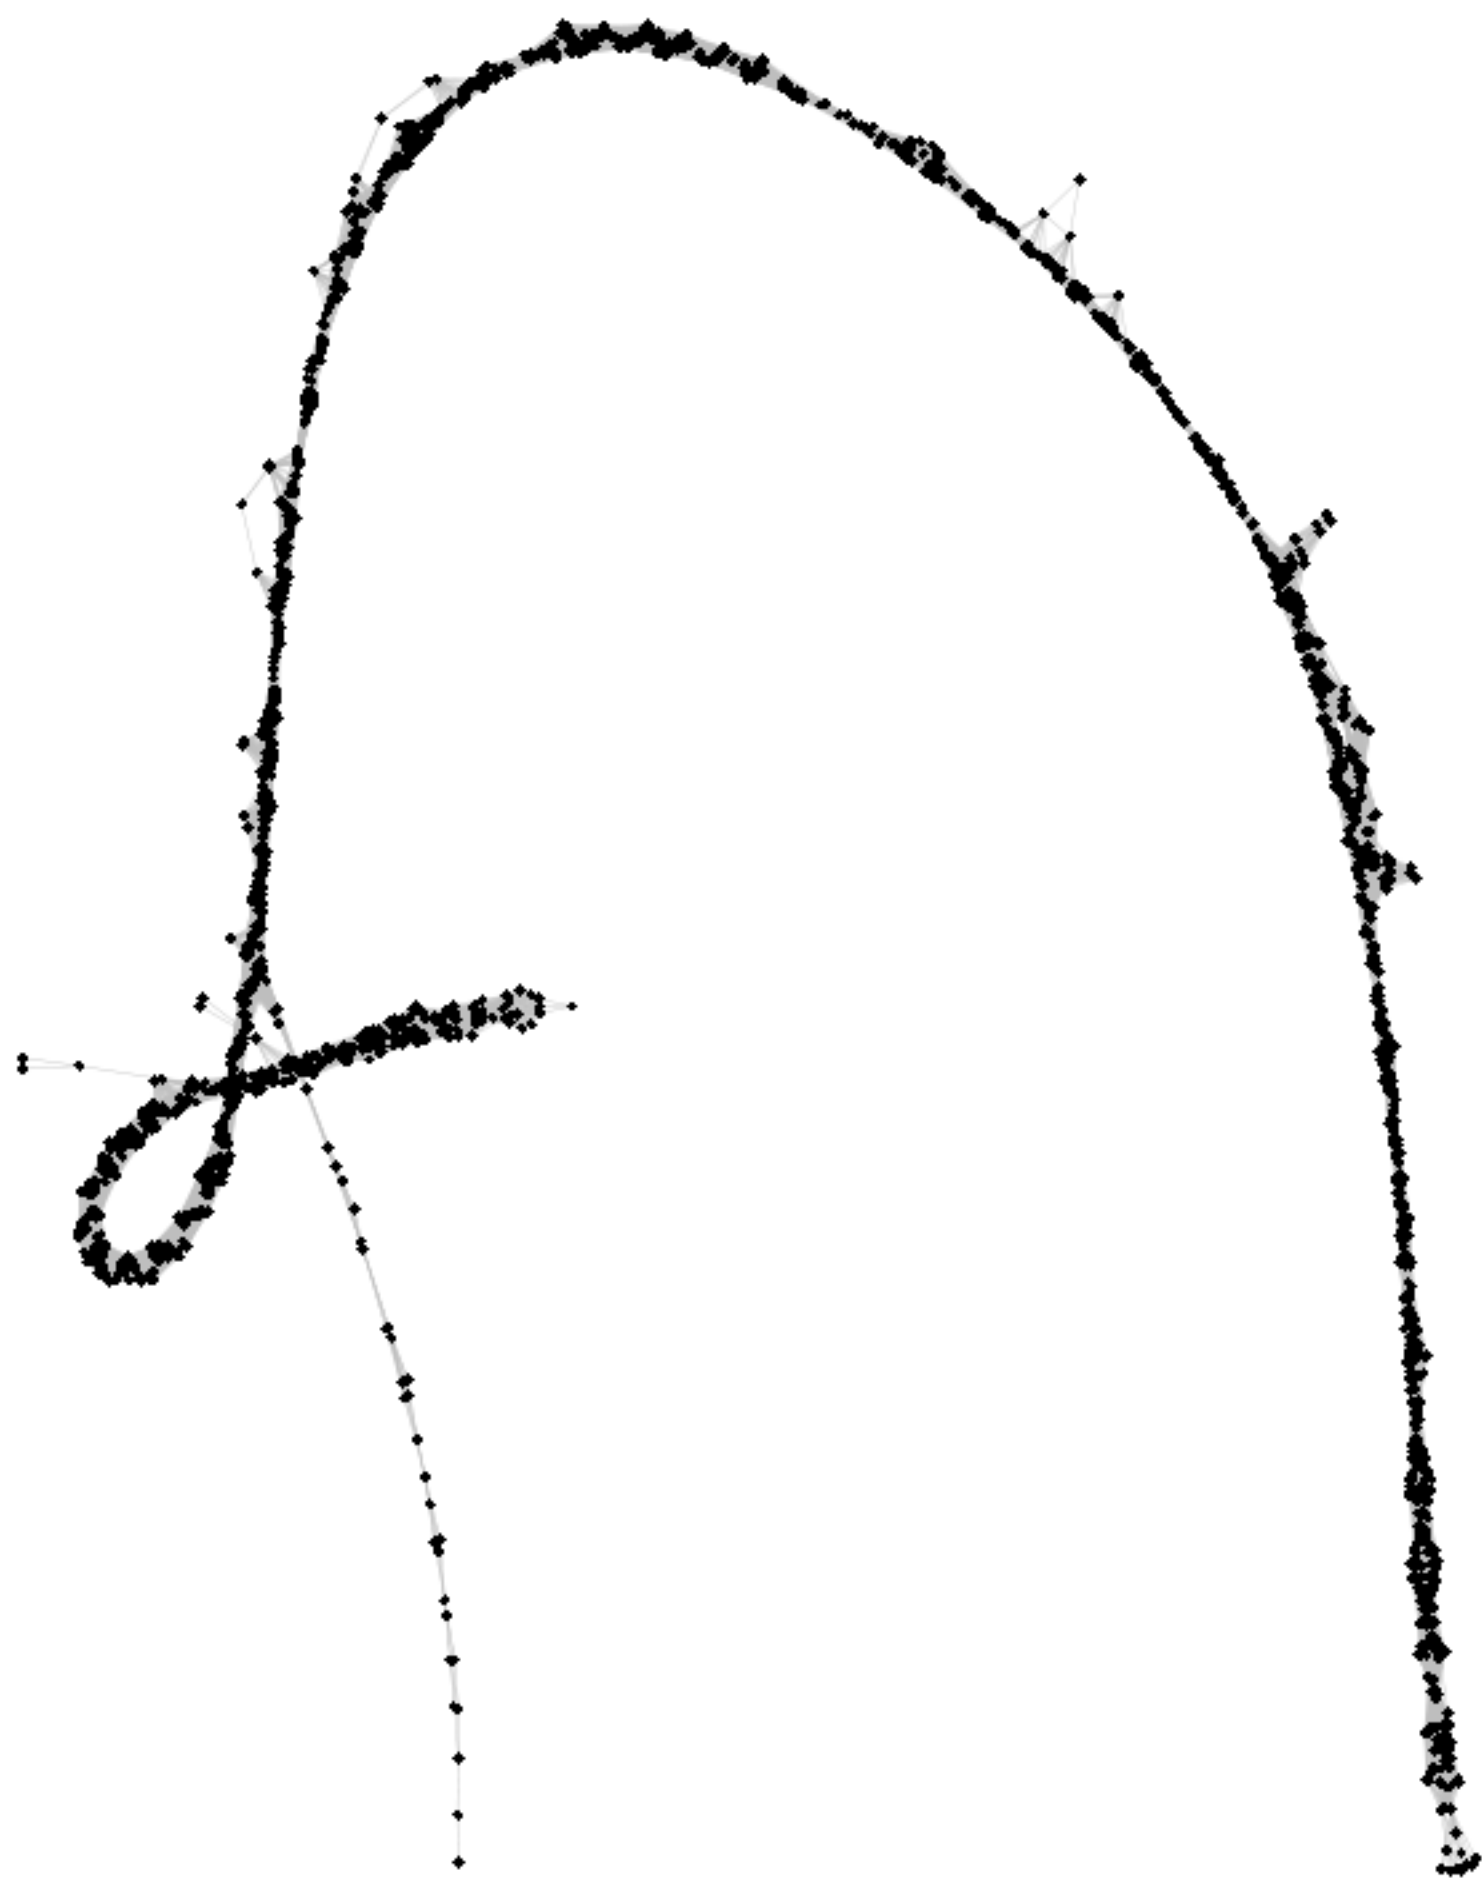

**CL110**

Number of reads: 1937  
Number of pairs: 51251  
Density: 0.02733  
Diameter: NA  
Mean edge weight: 212.16  
Max. degree: 91

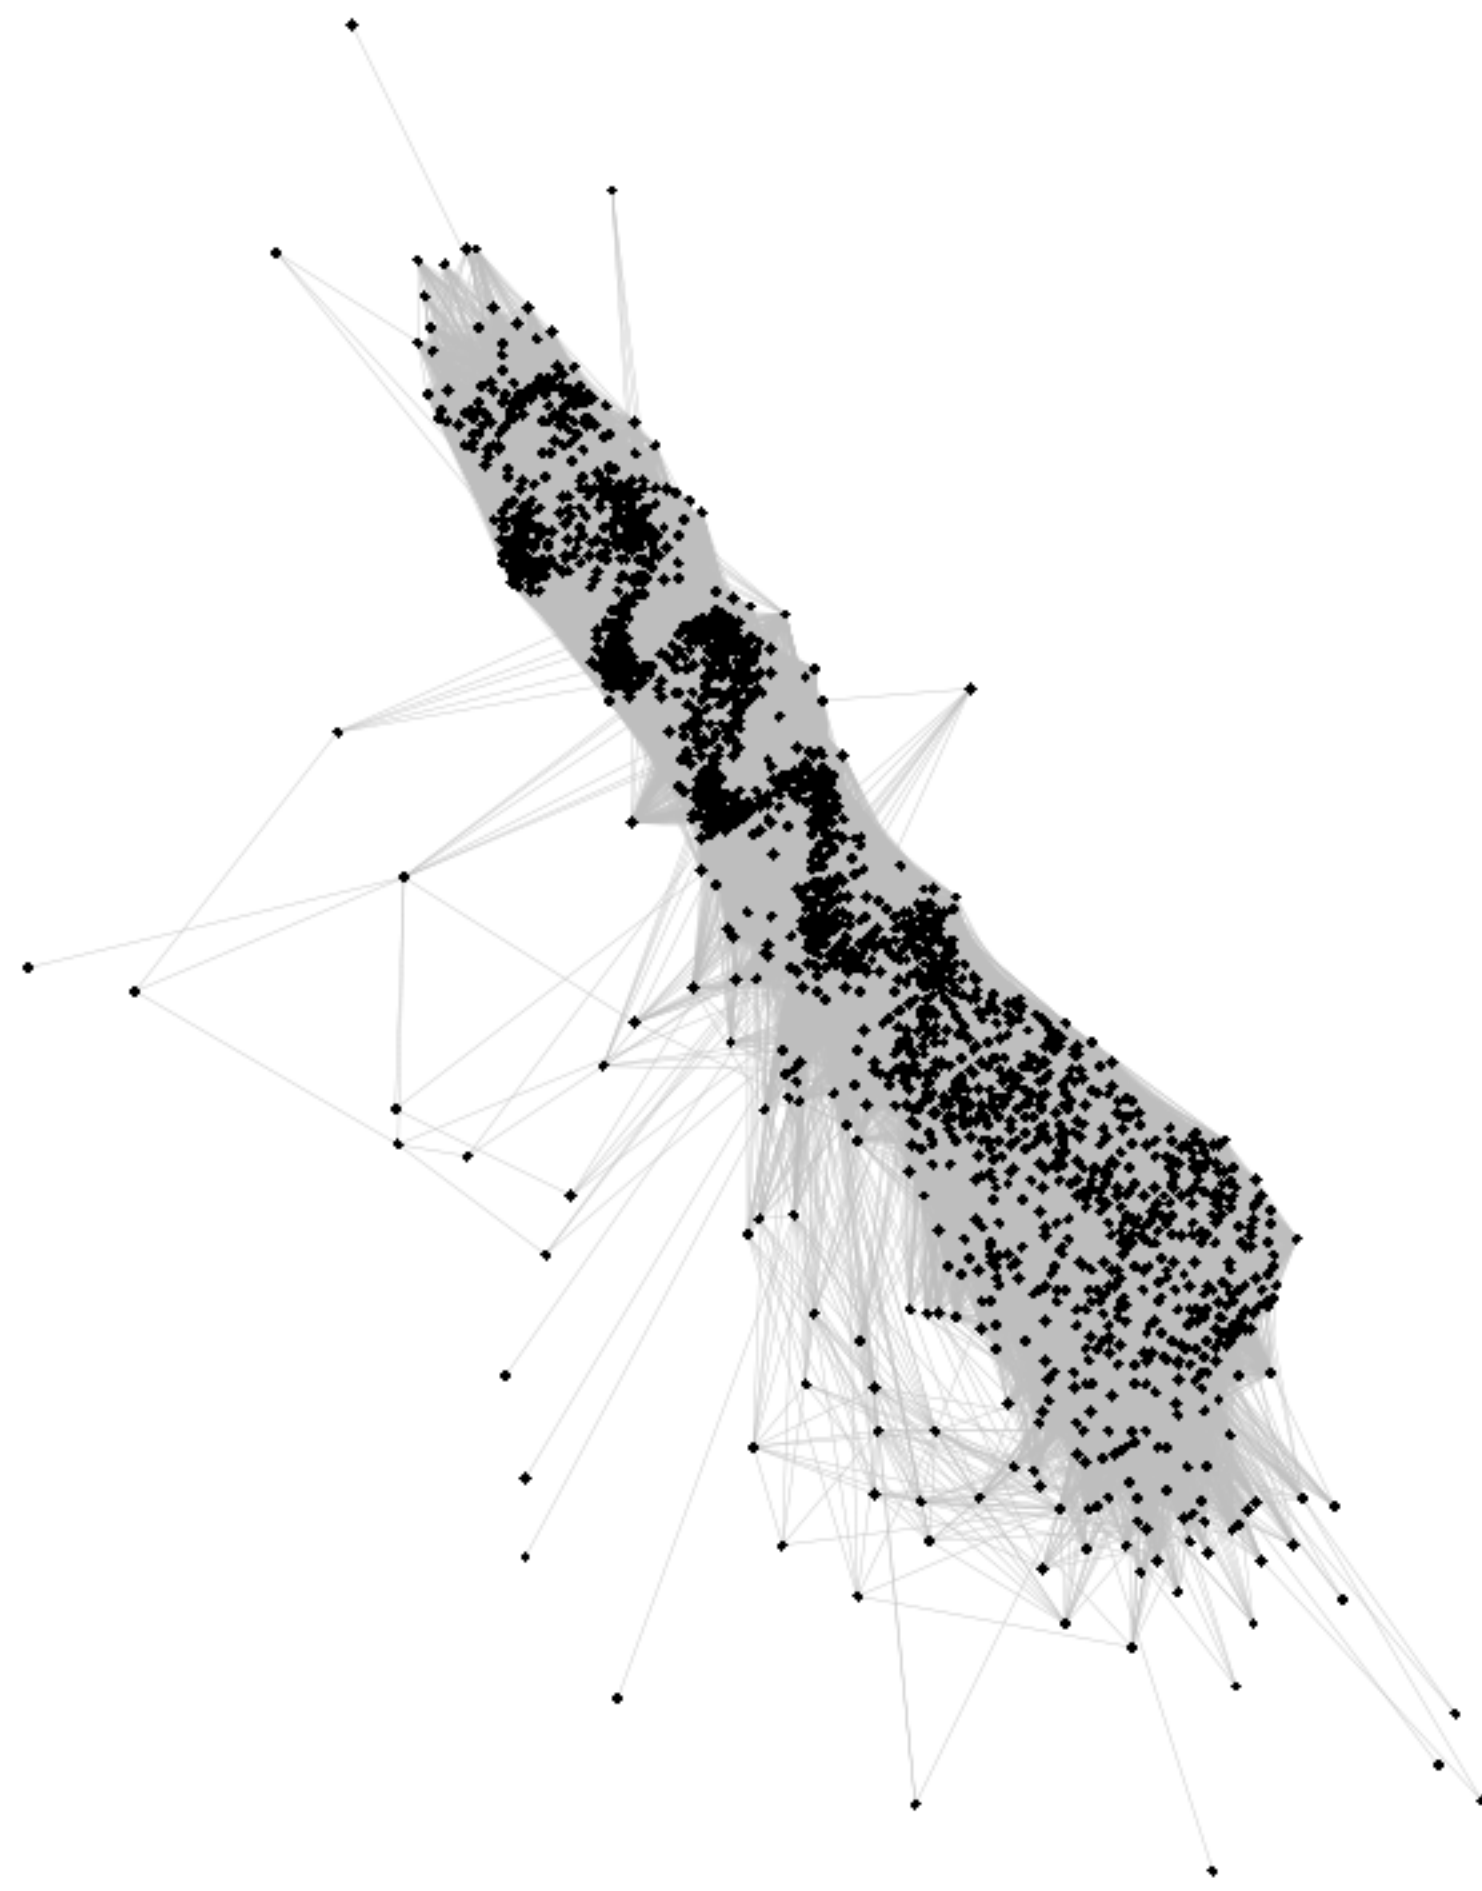

**CL111**

Number of reads: 1906  
Number of pairs: 413824  
Density: 0.2279  
Diameter: NA  
Mean edge weight: 171.7  
Max. degree: 652

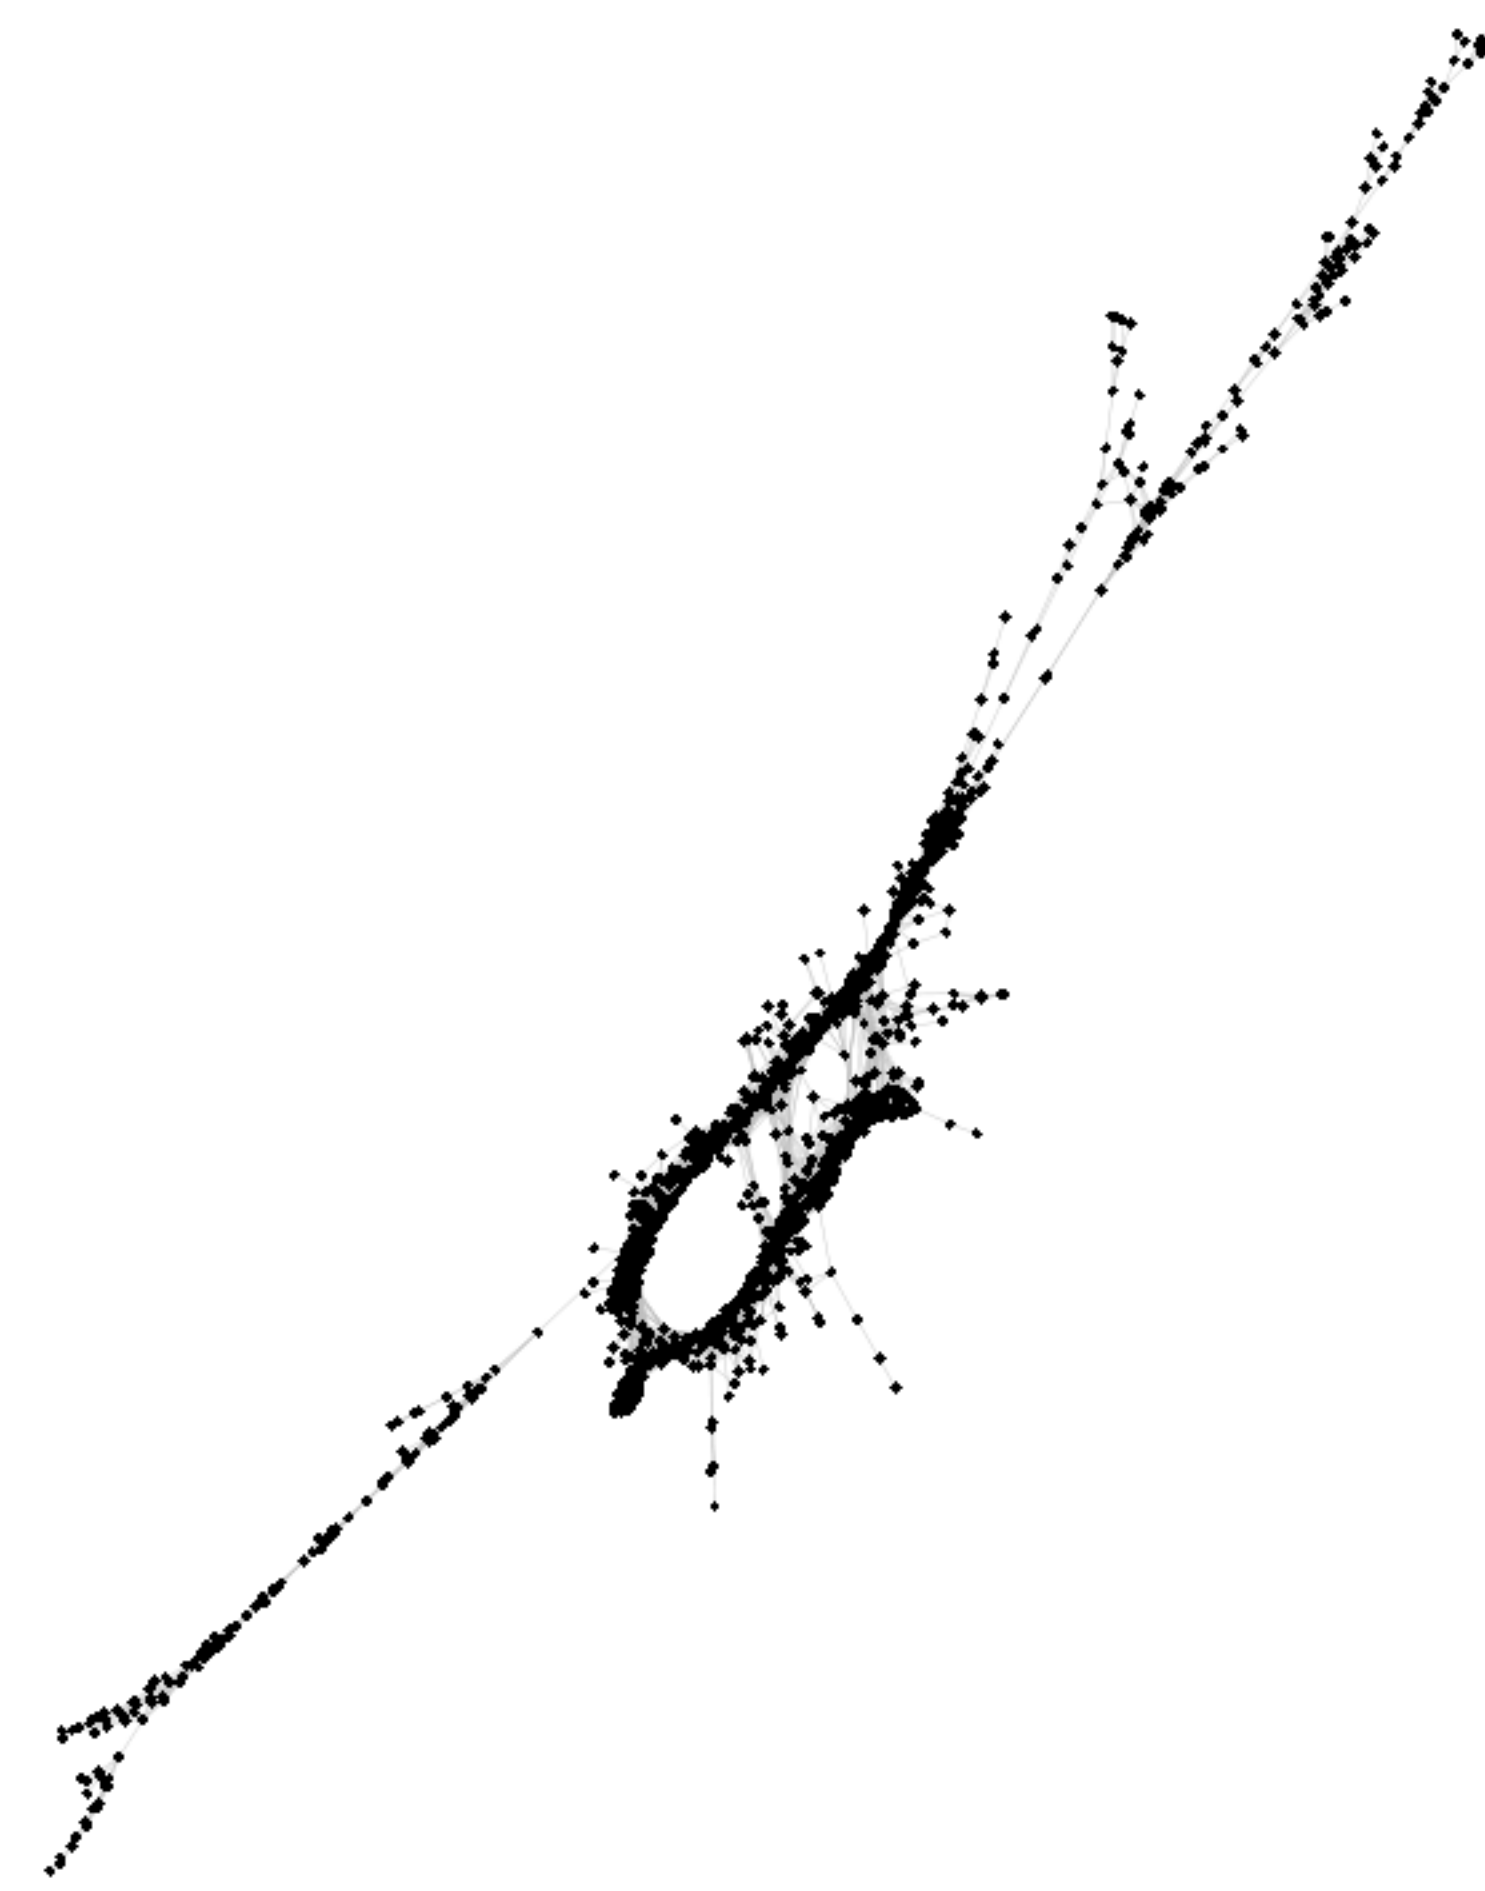

**CL112**

Number of reads: 1873  
Number of pairs: 47592  
Density: 0.02715  
Diameter: NA  
Mean edge weight: 165.29  
Max. degree: 114

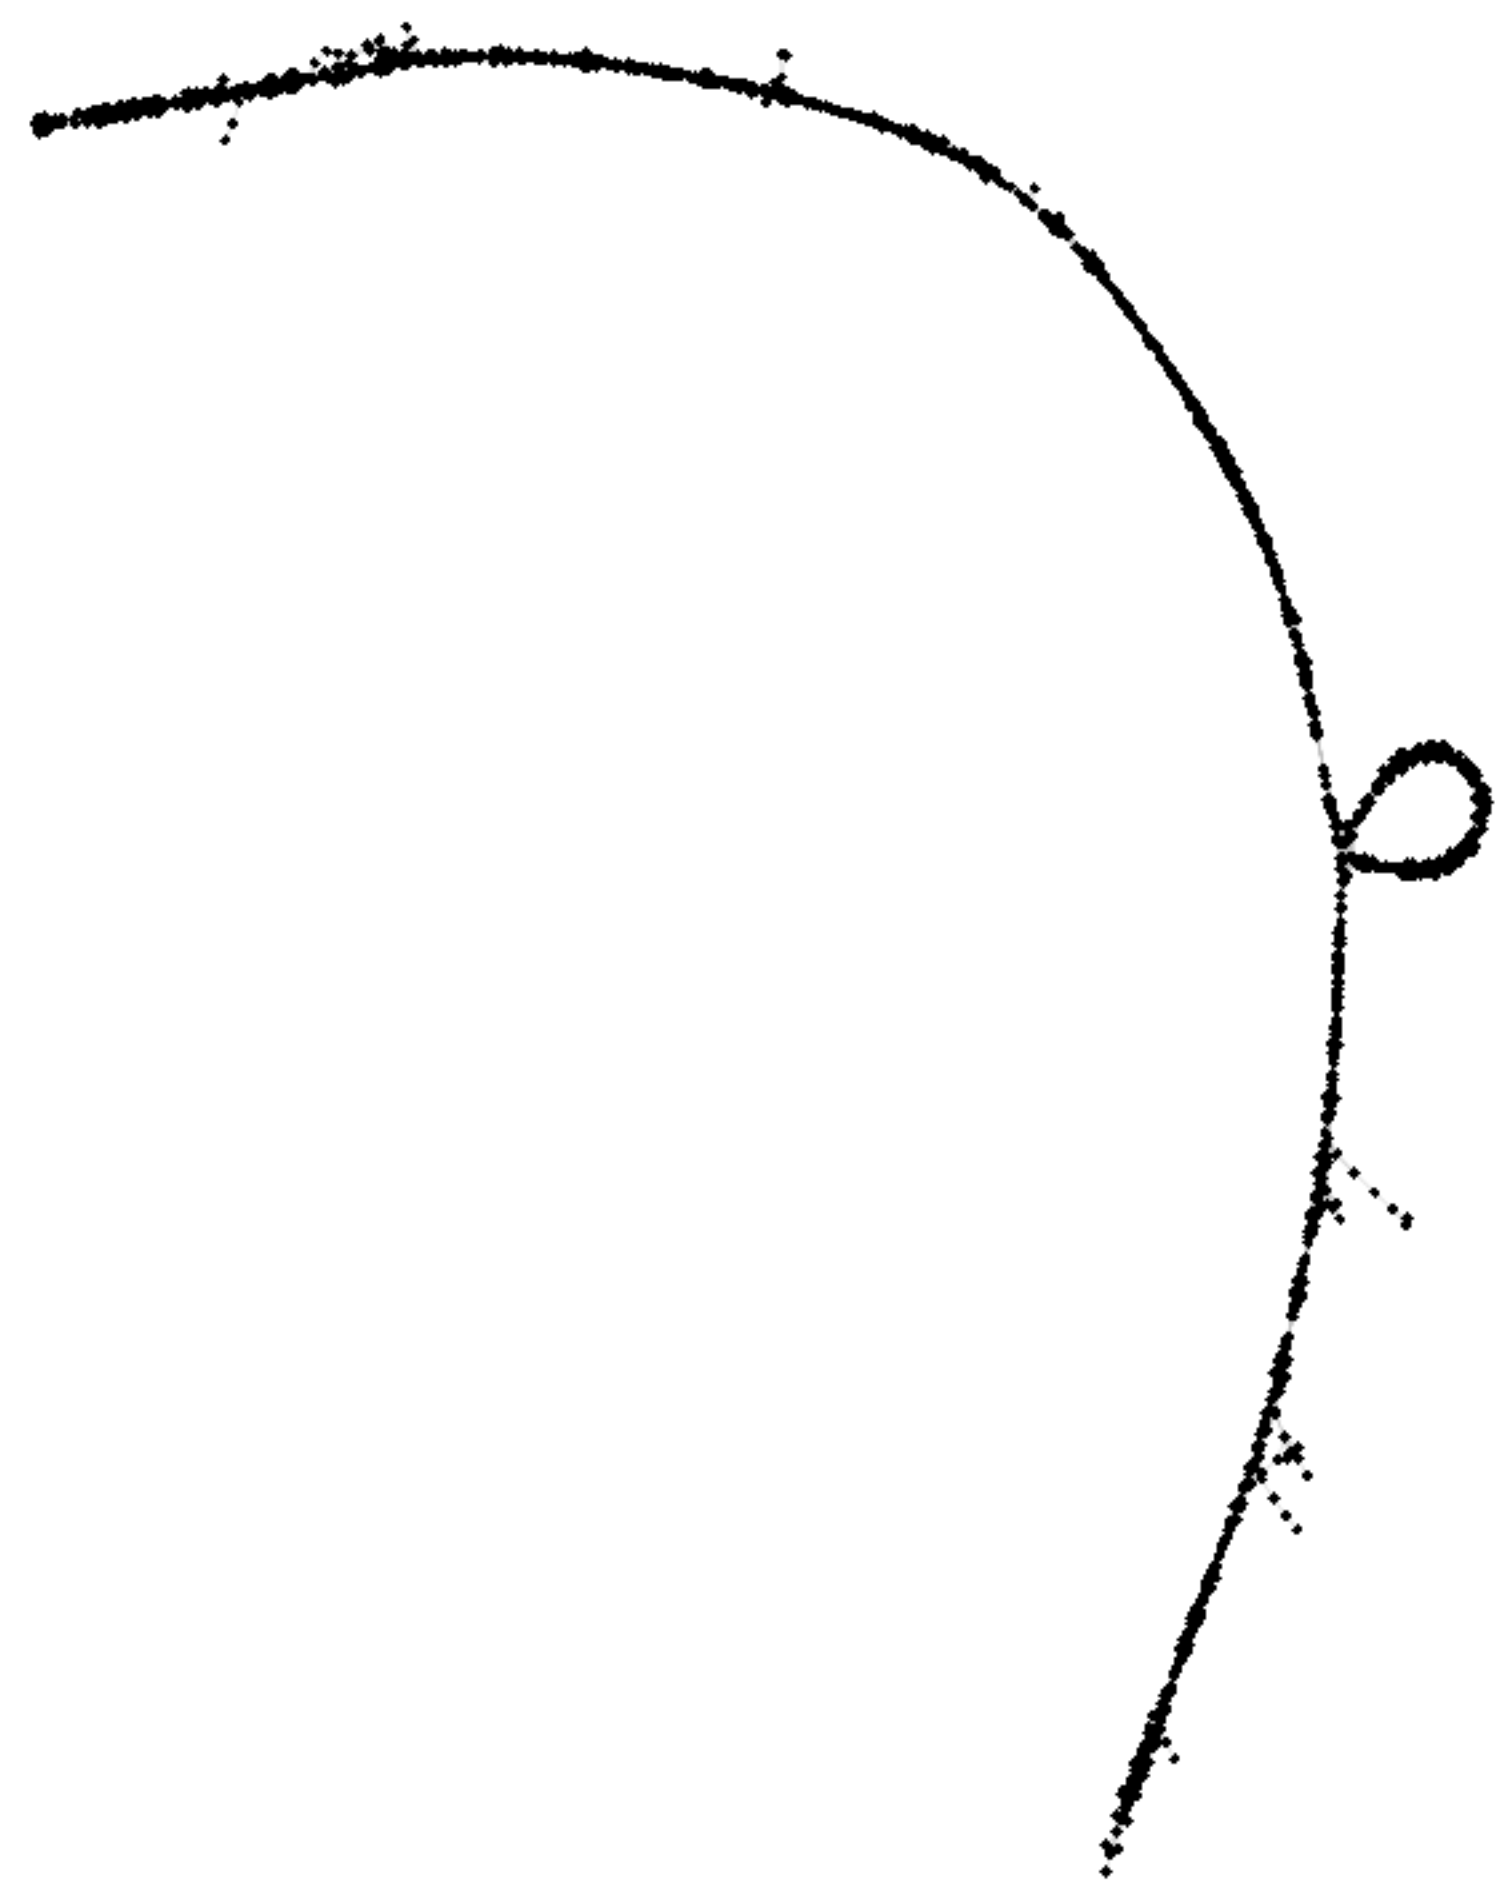

**CL113**

Number of reads: 1851  
Number of pairs: 25733  
Density: 0.01503  
Diameter: NA  
Mean edge weight: 213.46  
Max. degree: 49

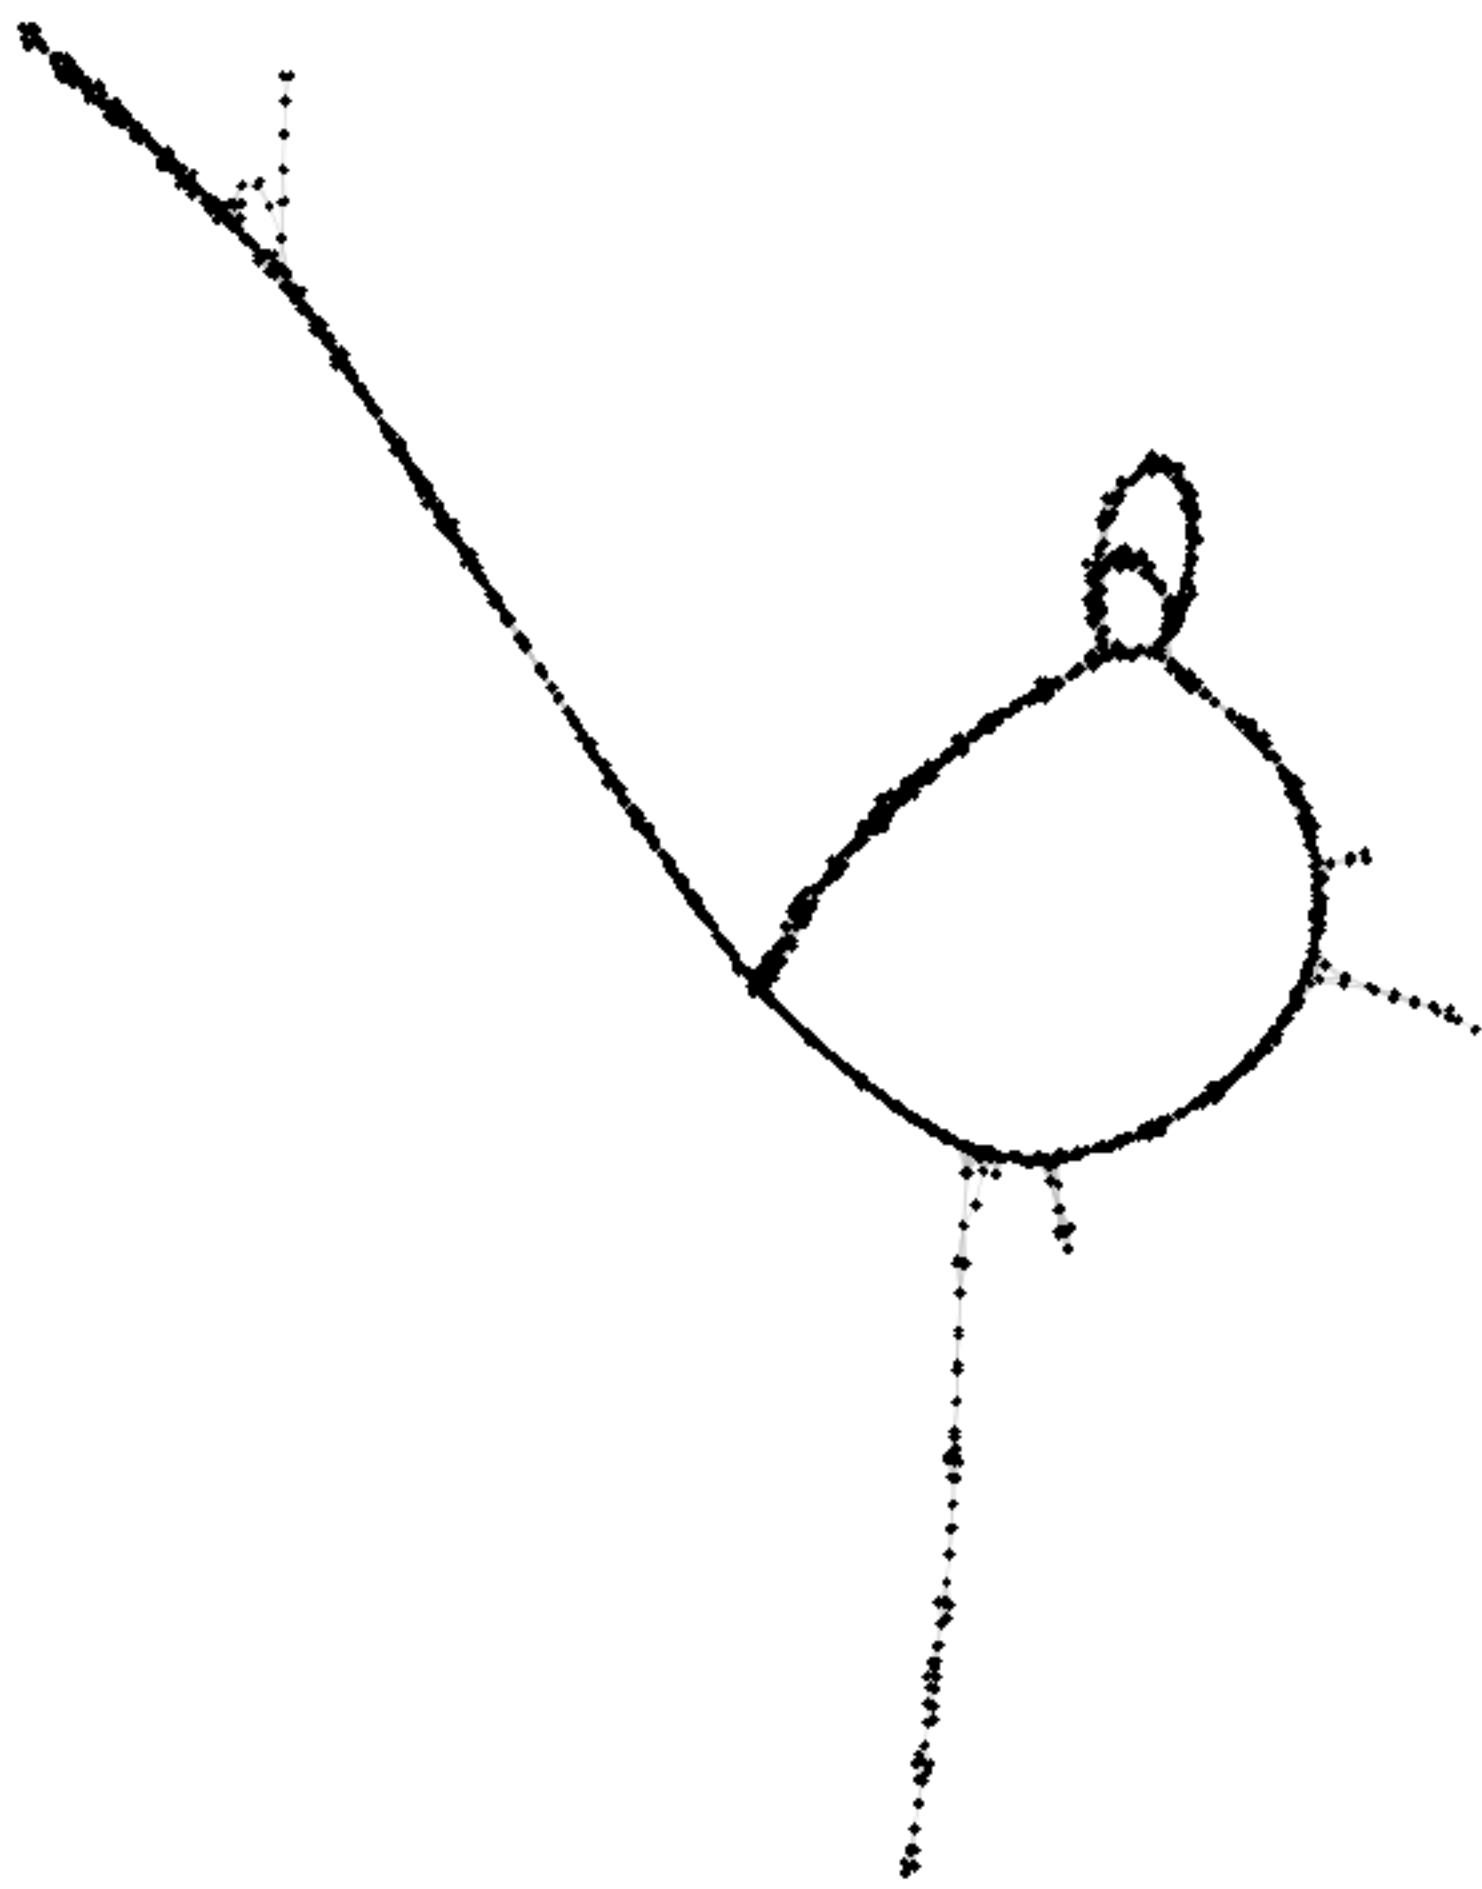

**CL114**

Number of reads: 1837  
Number of pairs: 27750  
Density: 0.01646  
Diameter: NA  
Mean edge weight: 212.12  
Max. degree: 70

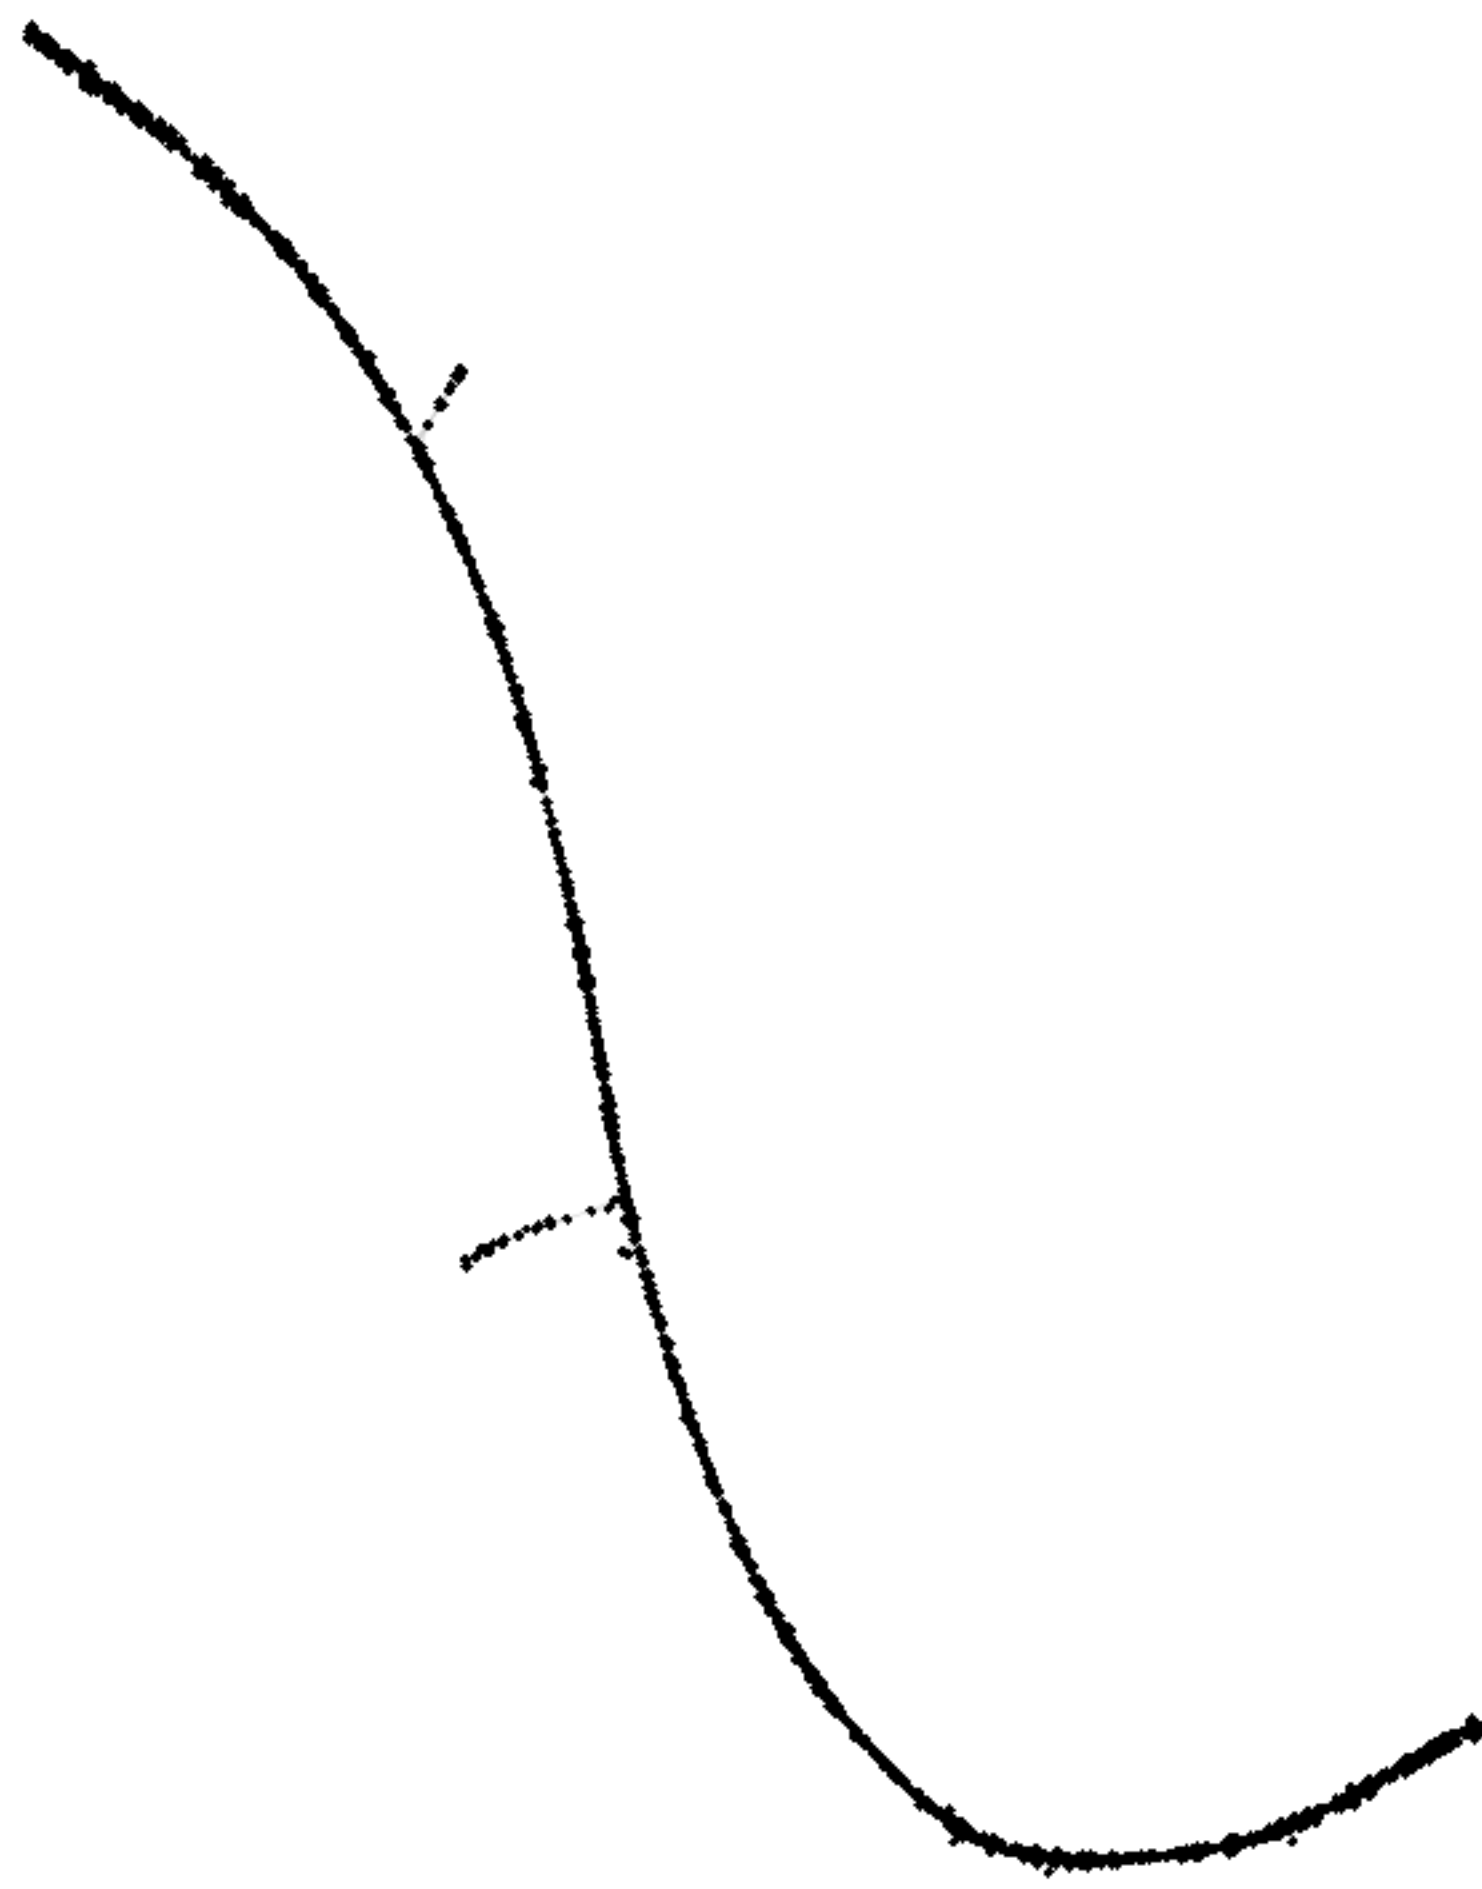

**CL115**

Number of reads: 1812  
Number of pairs: 26439  
Density: 0.01611  
Diameter: NA  
Mean edge weight: 214.36  
Max. degree: 45

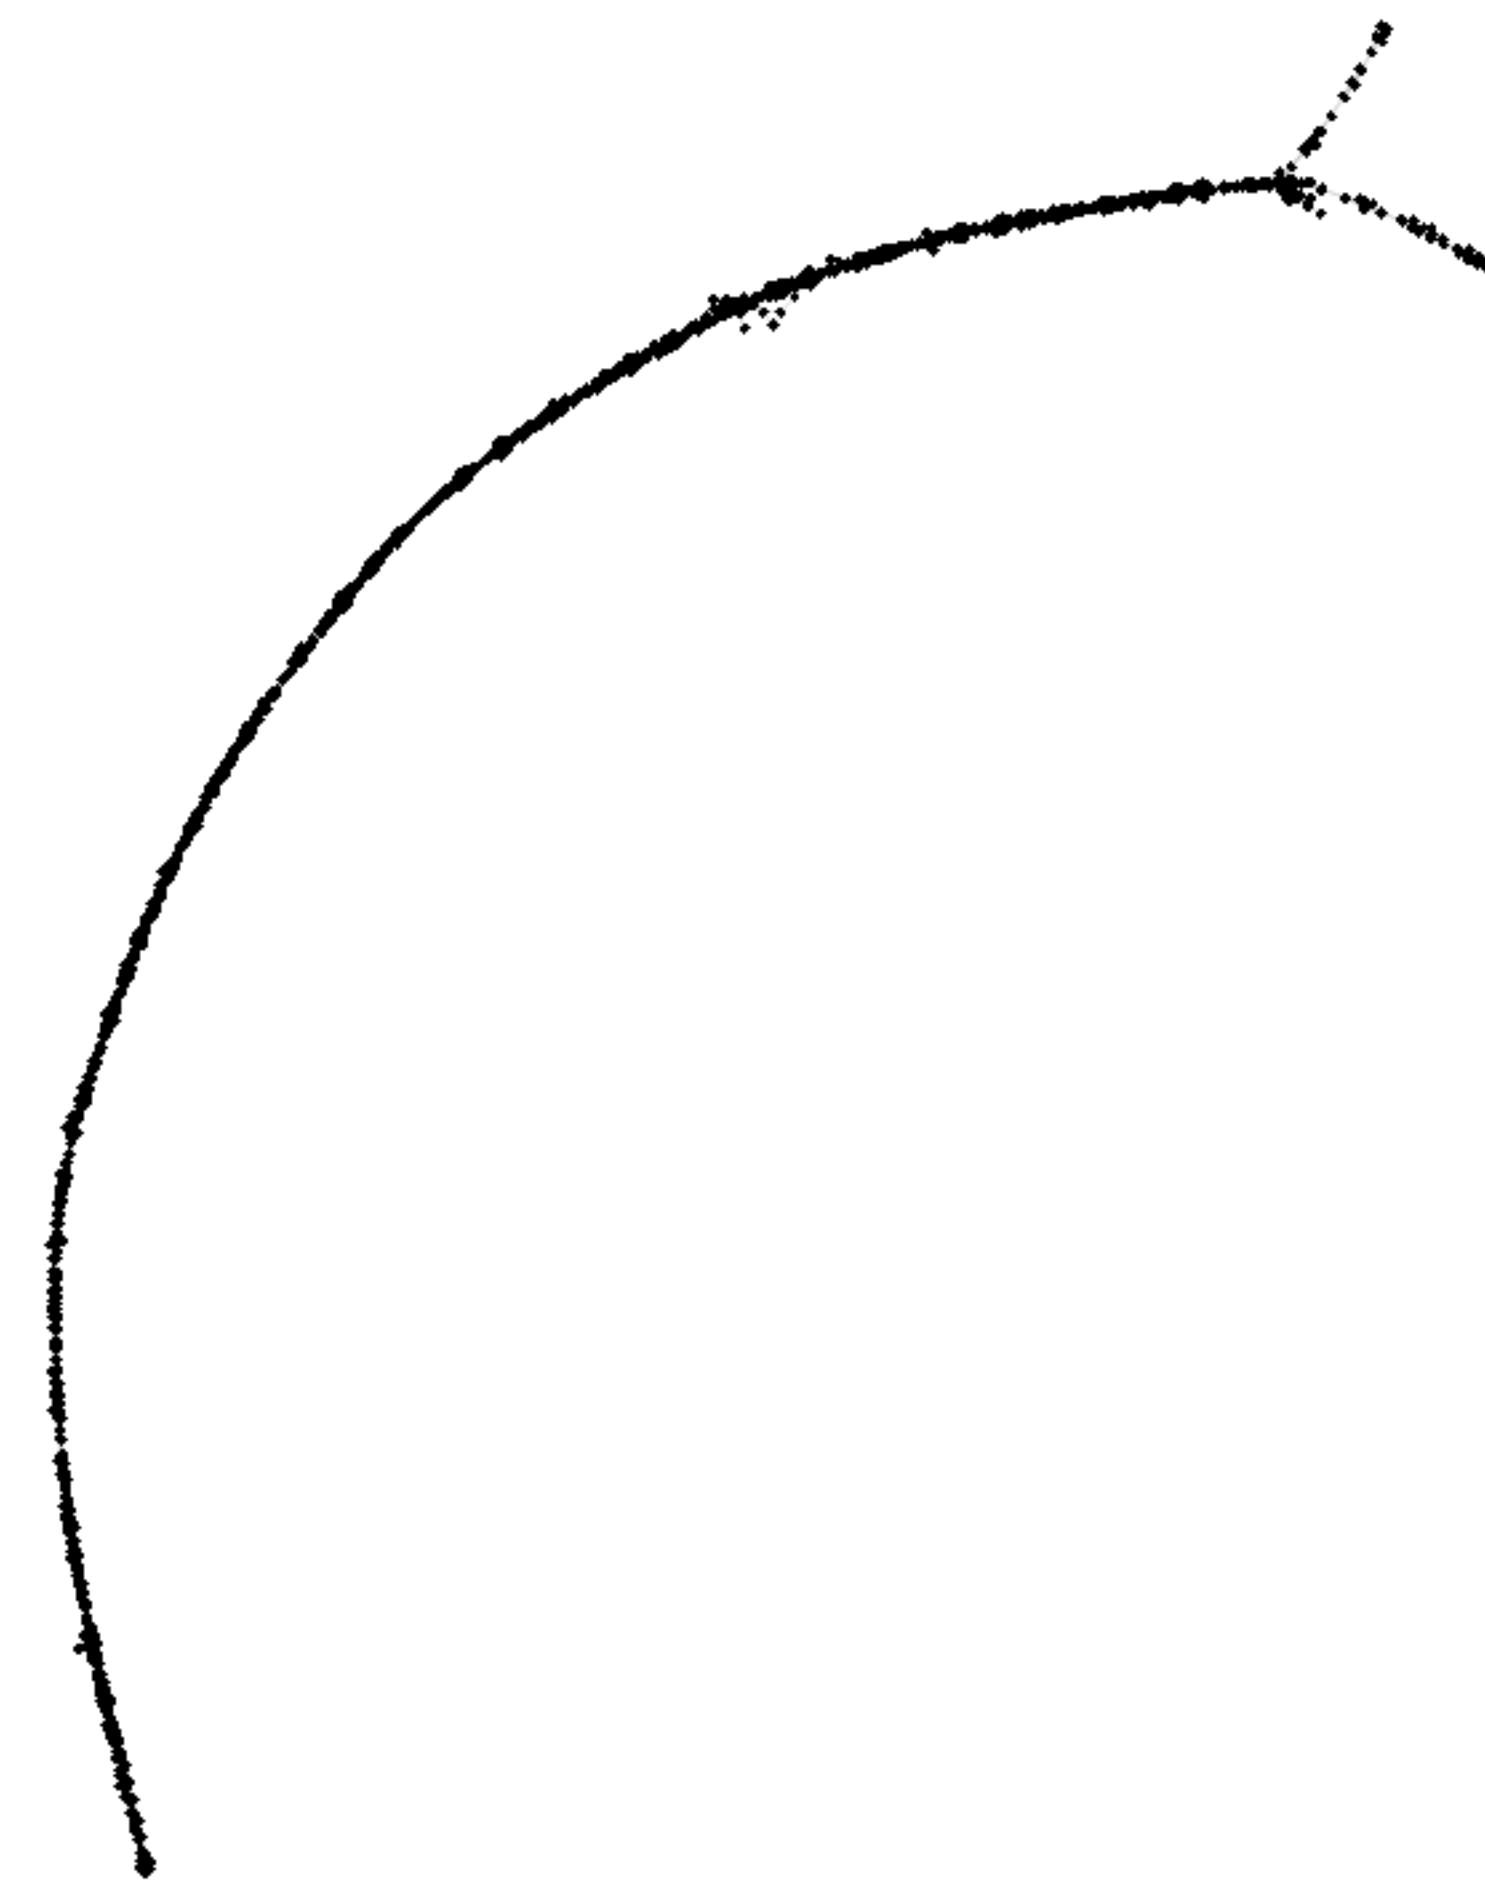

**CL116**

Number of reads: 1761  
Number of pairs: 24715  
Density: 0.01595  
Diameter: NA  
Mean edge weight: 214.01  
Max. degree: 49

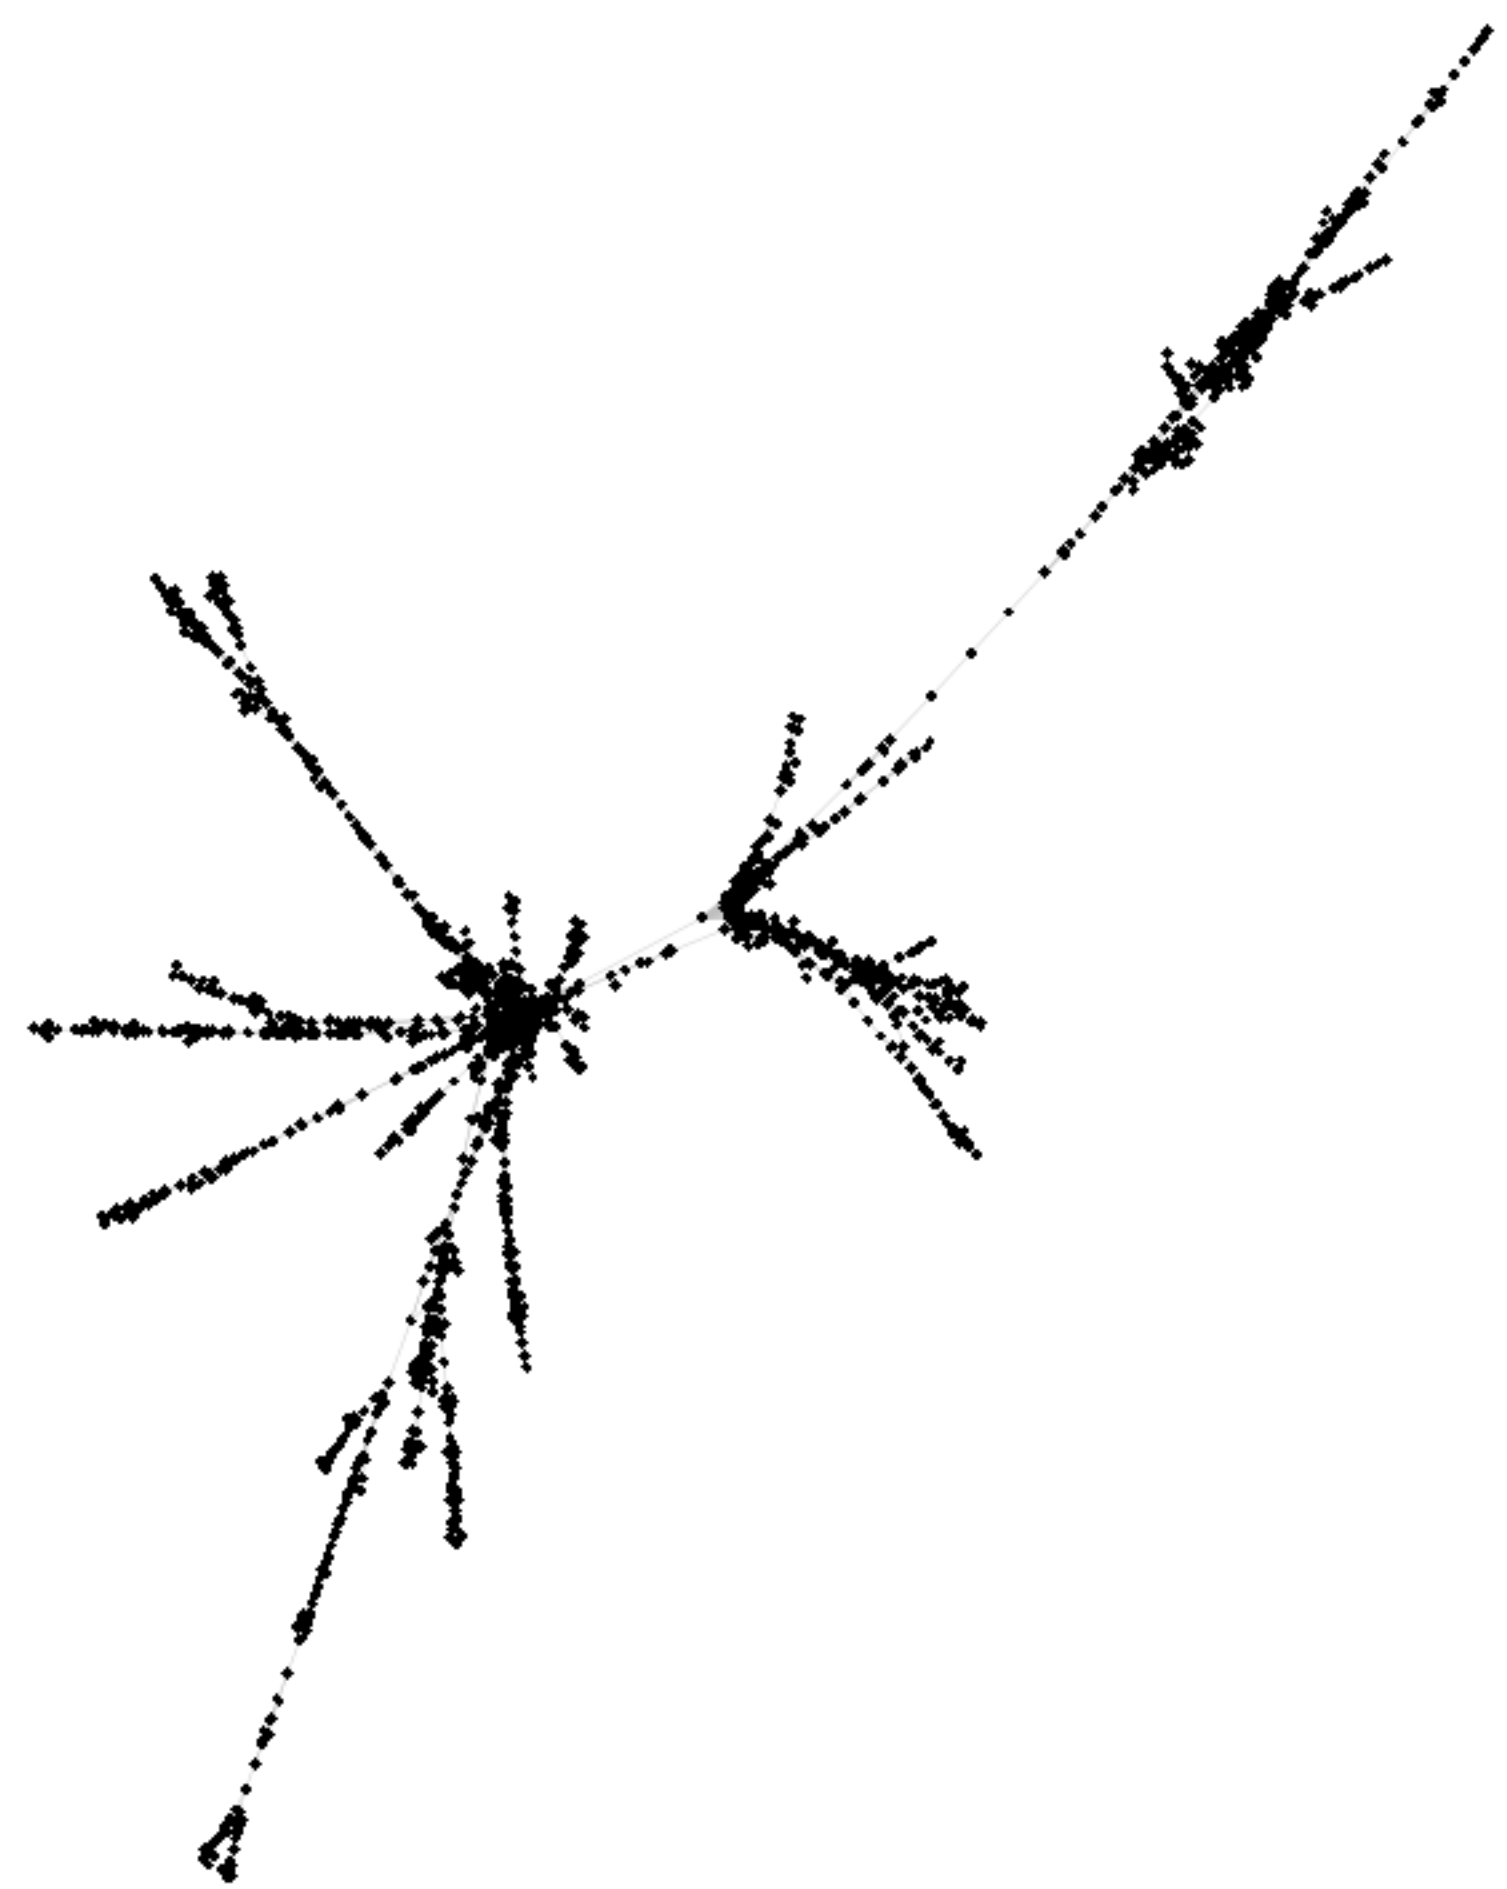

**CL117**

Number of reads: 1713  
Number of pairs: 8414  
Density: 0.005738  
Diameter: NA  
Mean edge weight: 156.54  
Max. degree: 67

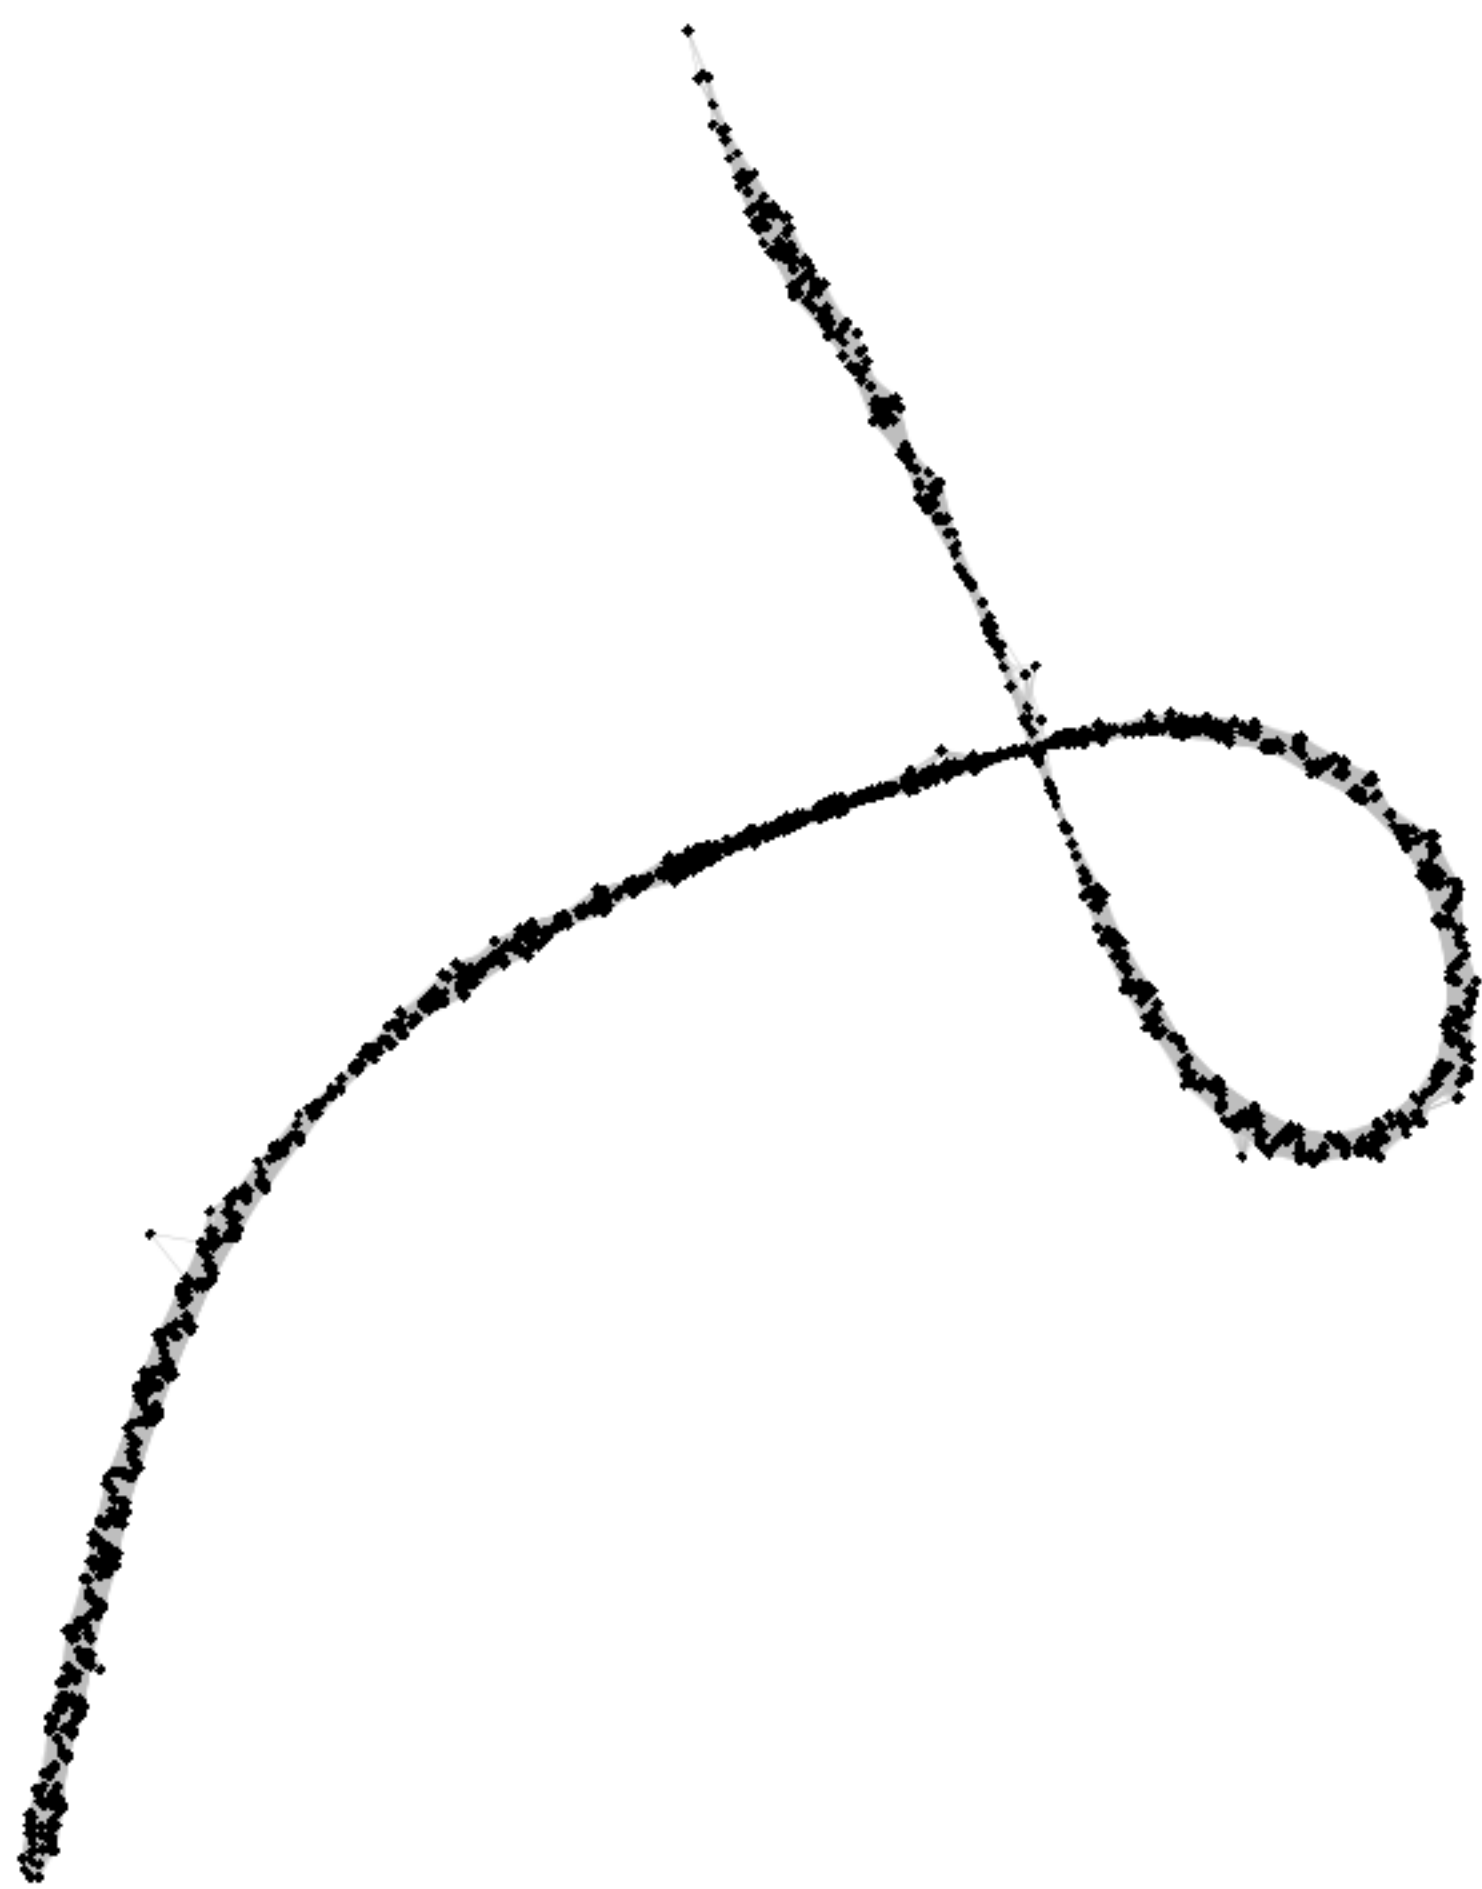

**CL118**

Number of reads: 1617  
Number of pairs: 46058  
Density: 0.03525  
Diameter: NA  
Mean edge weight: 215.42  
Max. degree: 86

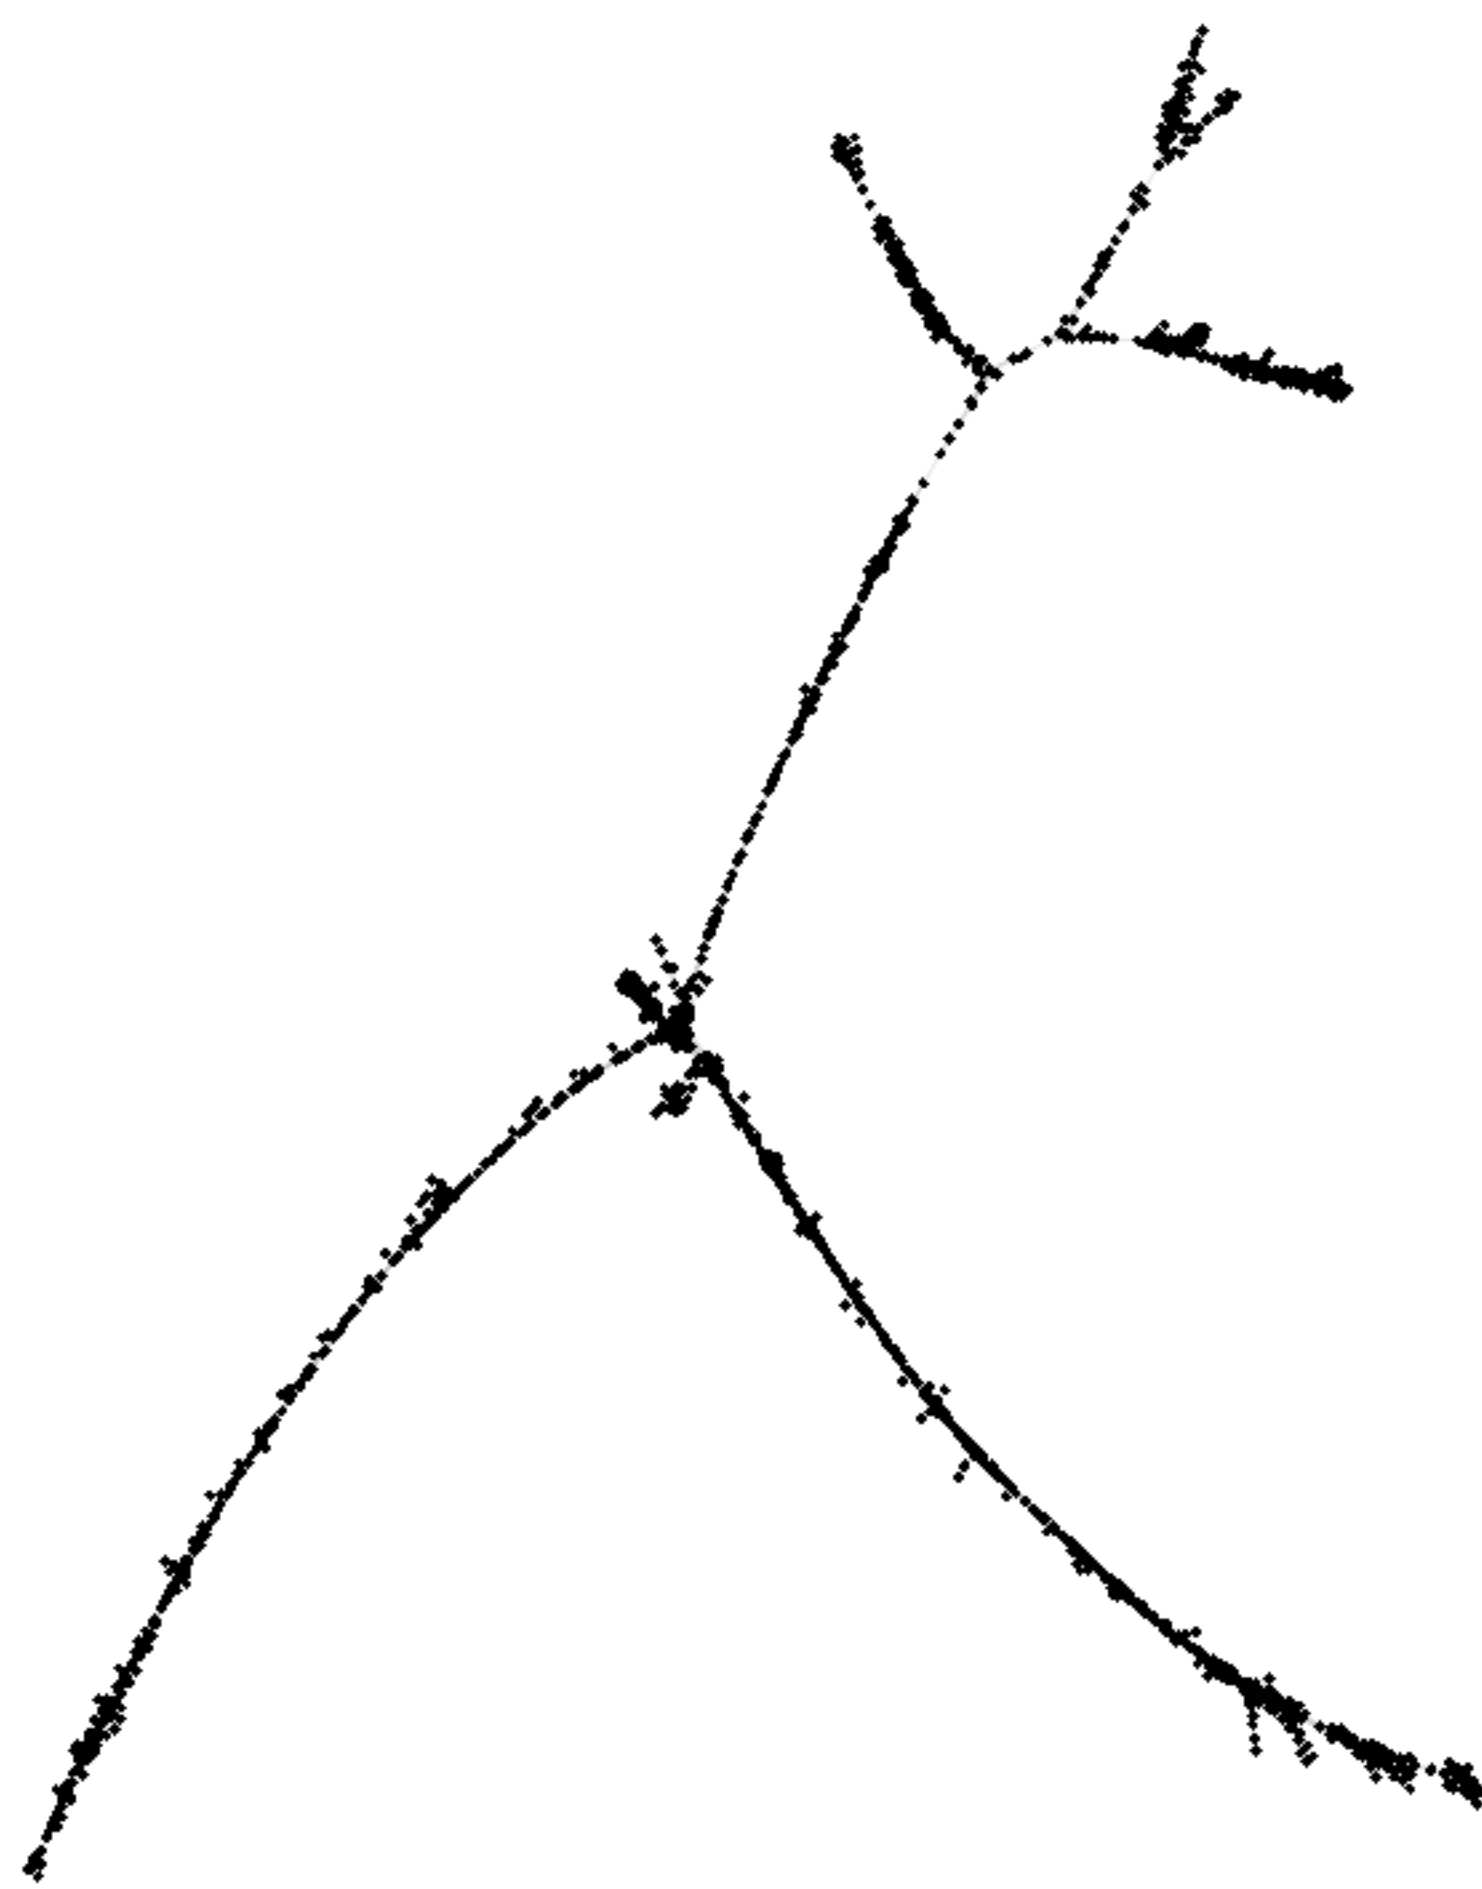

**CL119**

Number of reads: 1569  
Number of pairs: 11334  
Density: 0.009214  
Diameter: NA  
Mean edge weight: 172.74  
Max. degree: 41

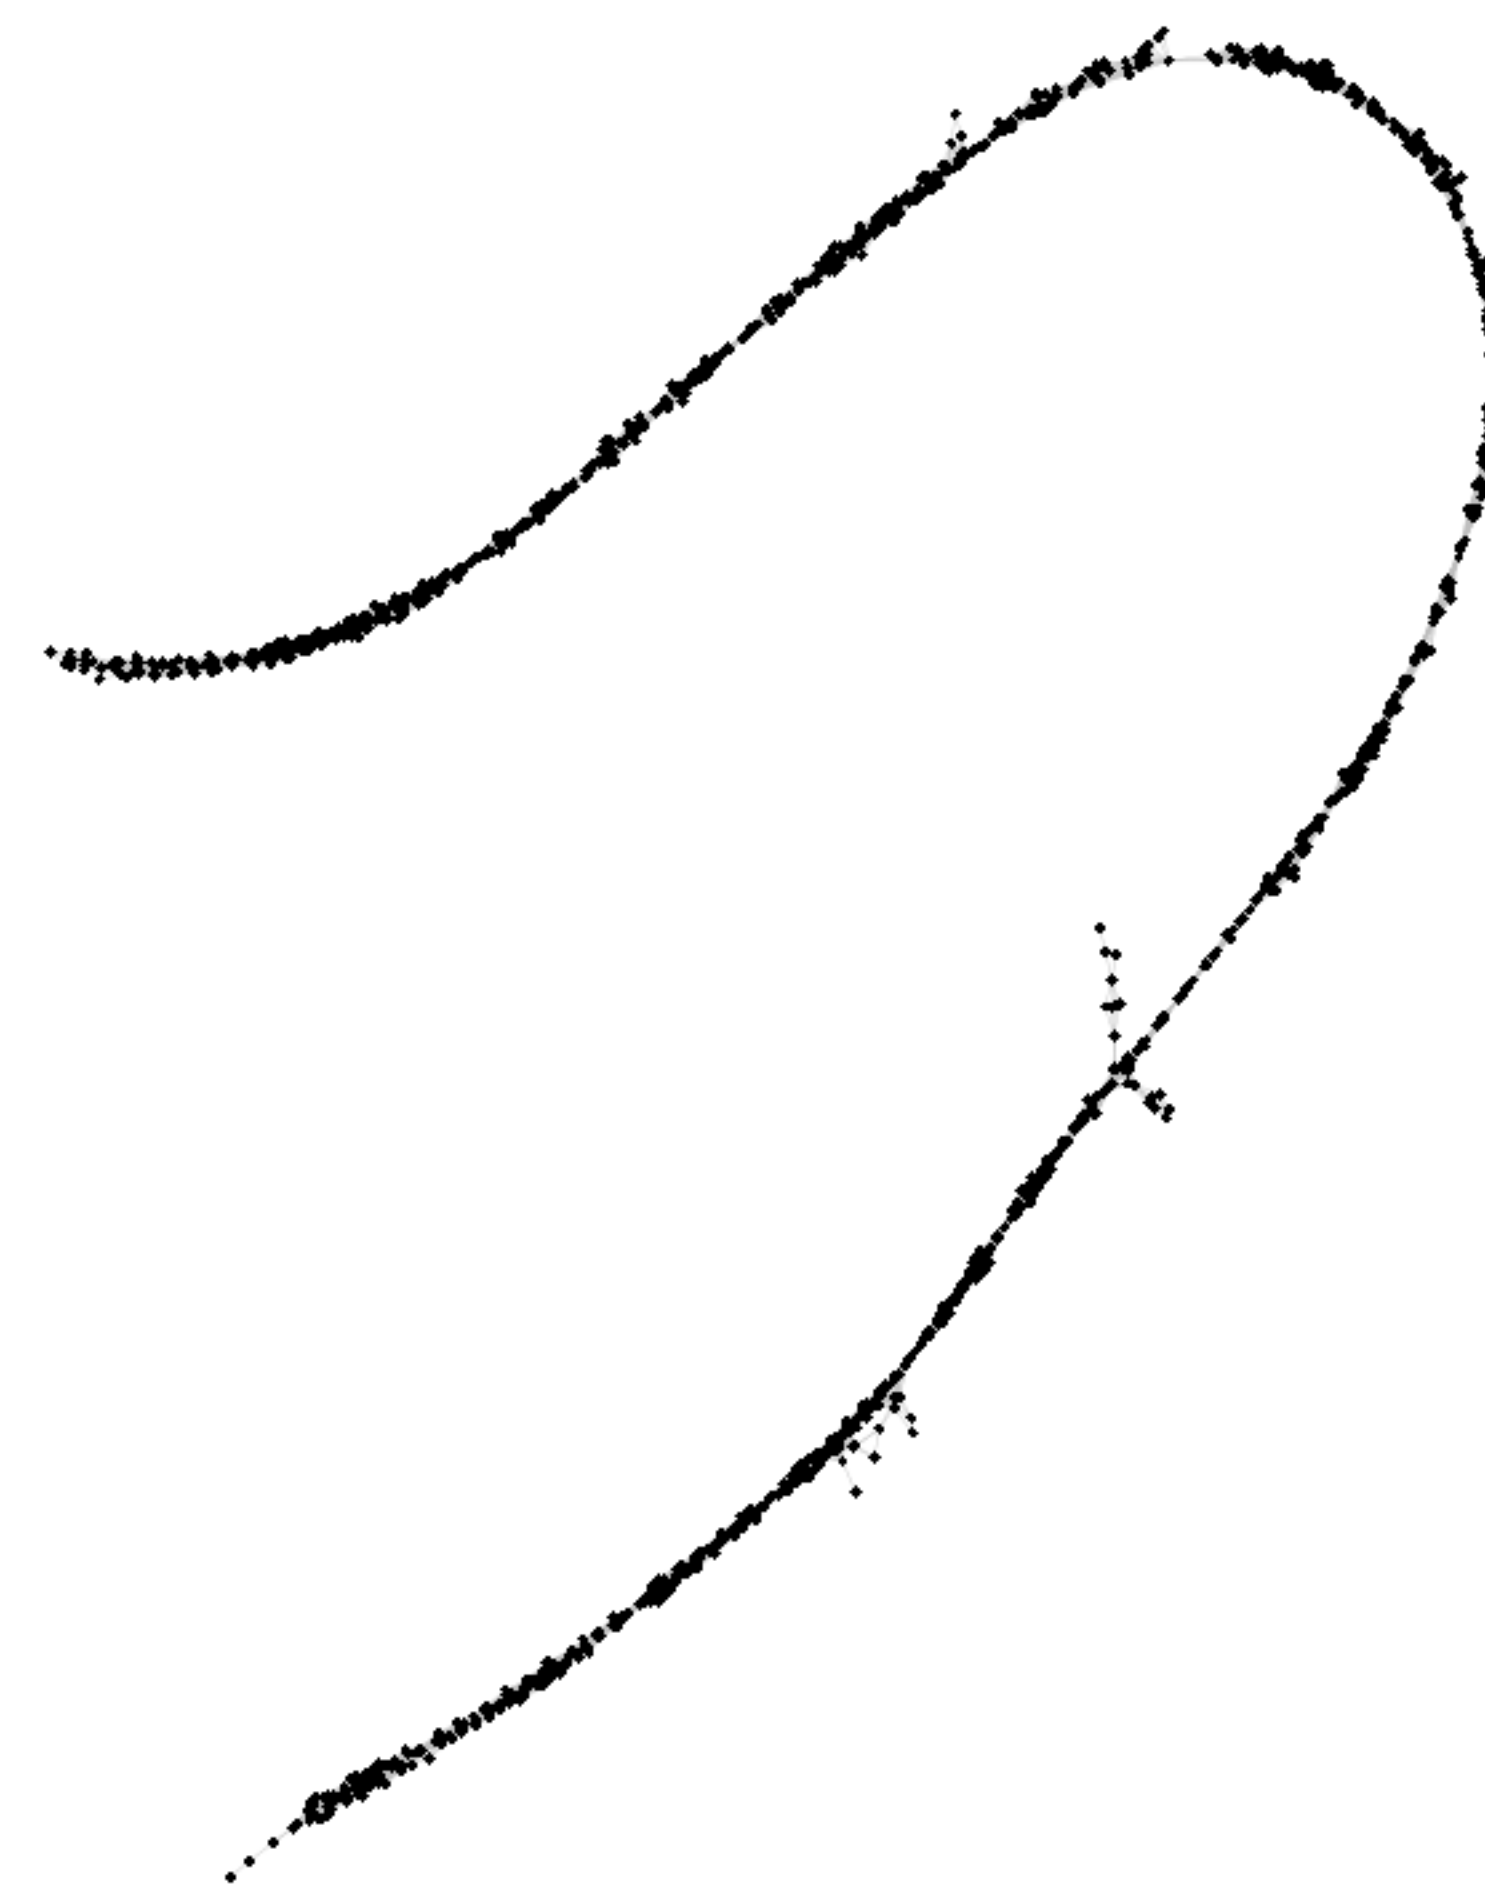

**CL120**

Number of reads: 1486  
Number of pairs: 19969  
Density: 0.0181  
Diameter: NA  
Mean edge weight: 213.78  
Max. degree: 44

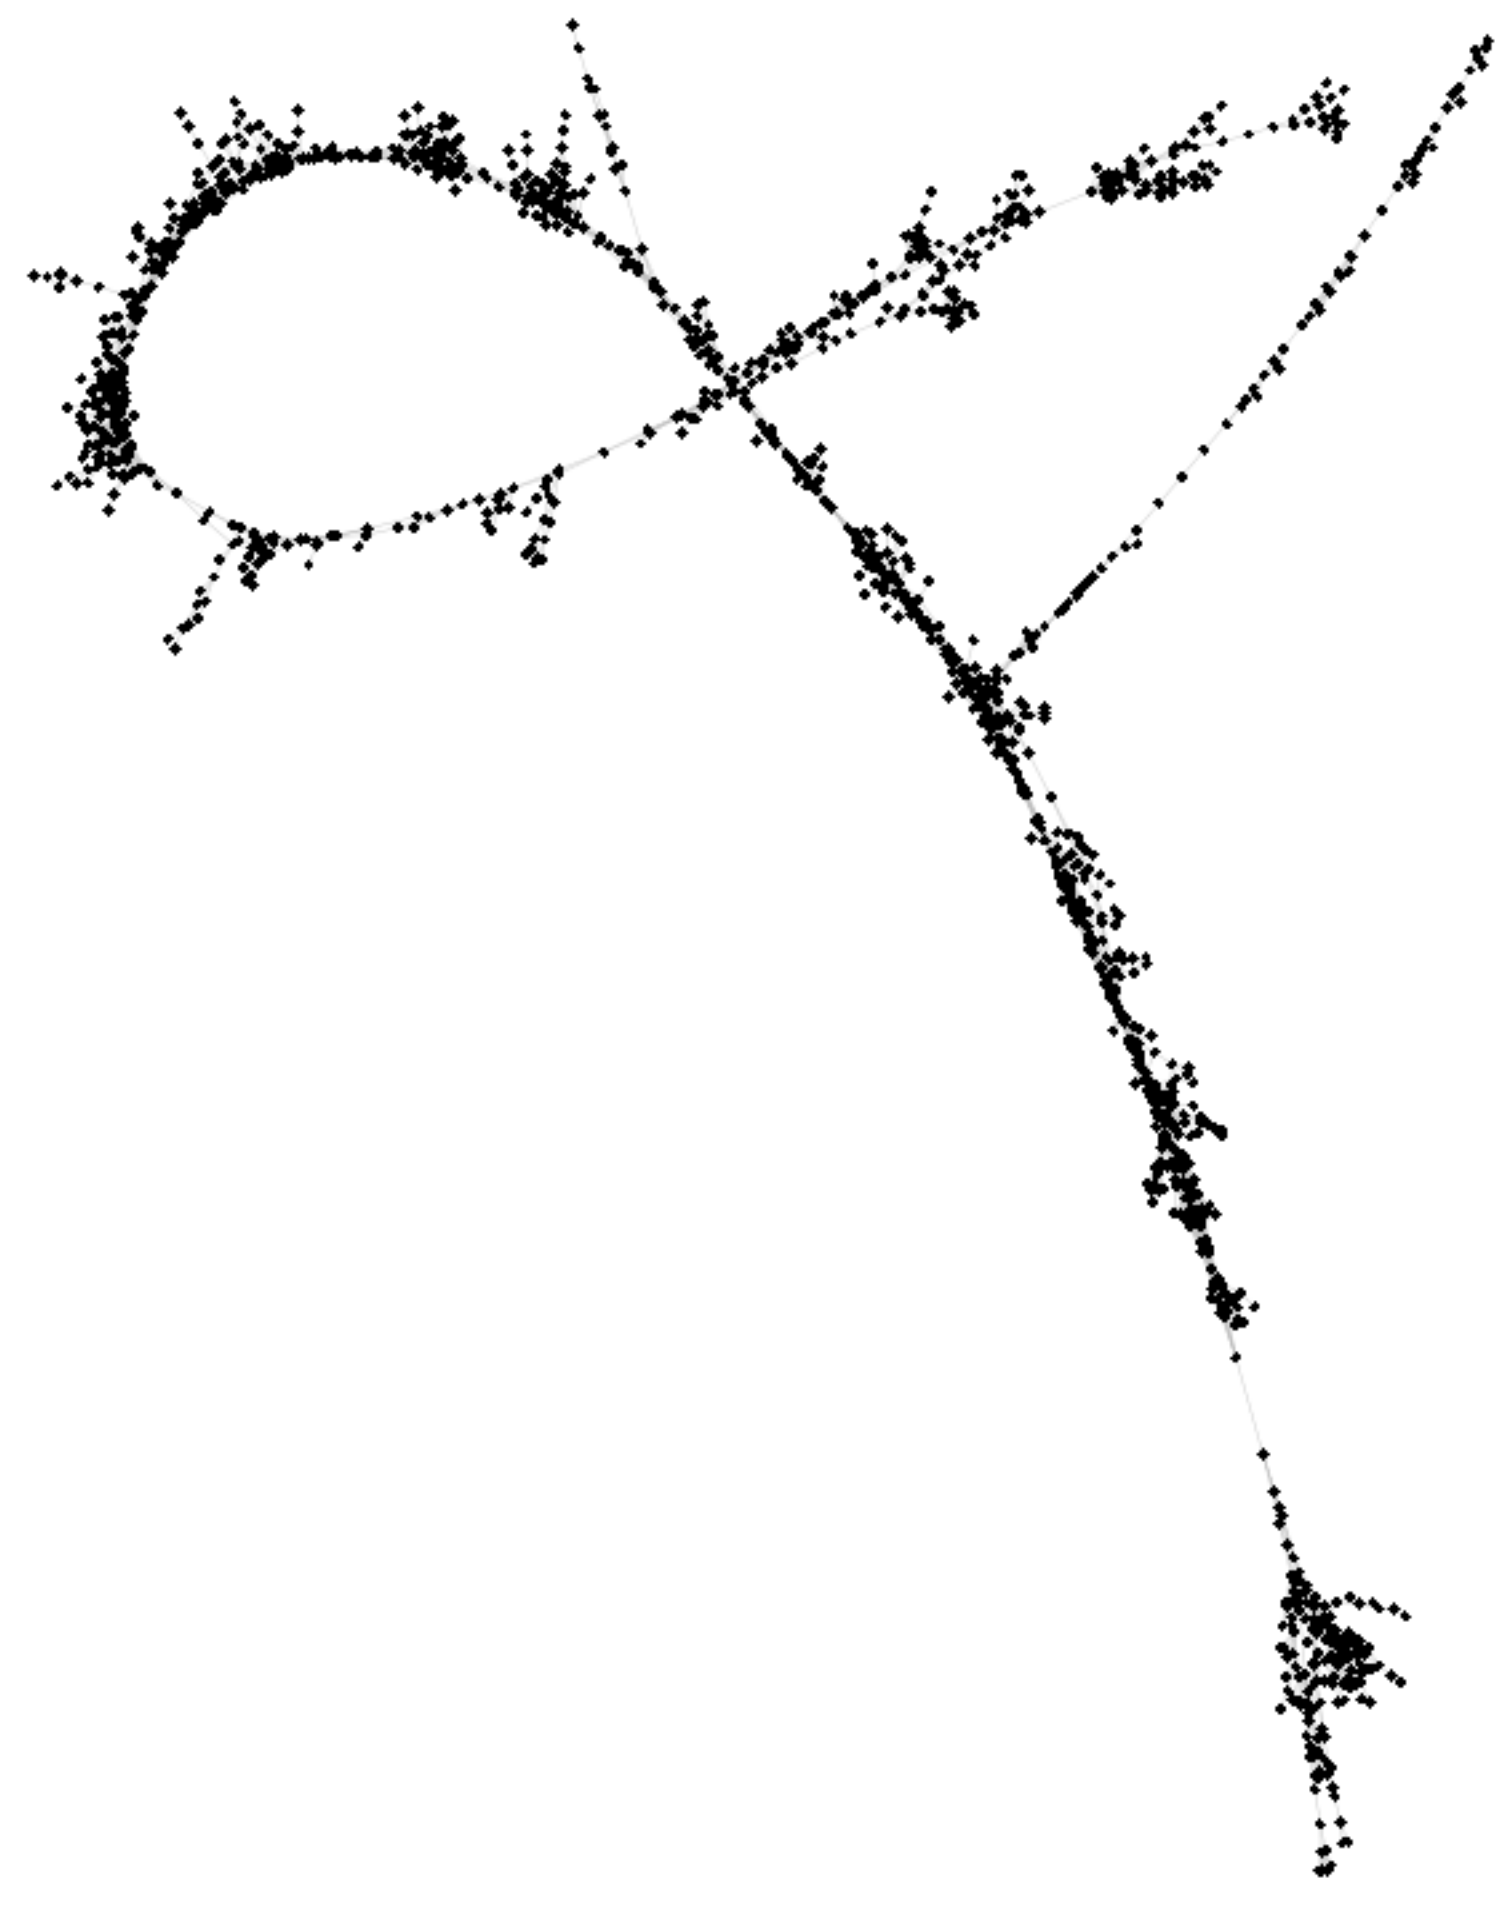

**CL121**

Number of reads: 1452  
 Number of pairs: 6587  
 Density: 0.006253  
 Diameter: NA  
 Mean edge weight: 153.1  
 Max. degree: 43

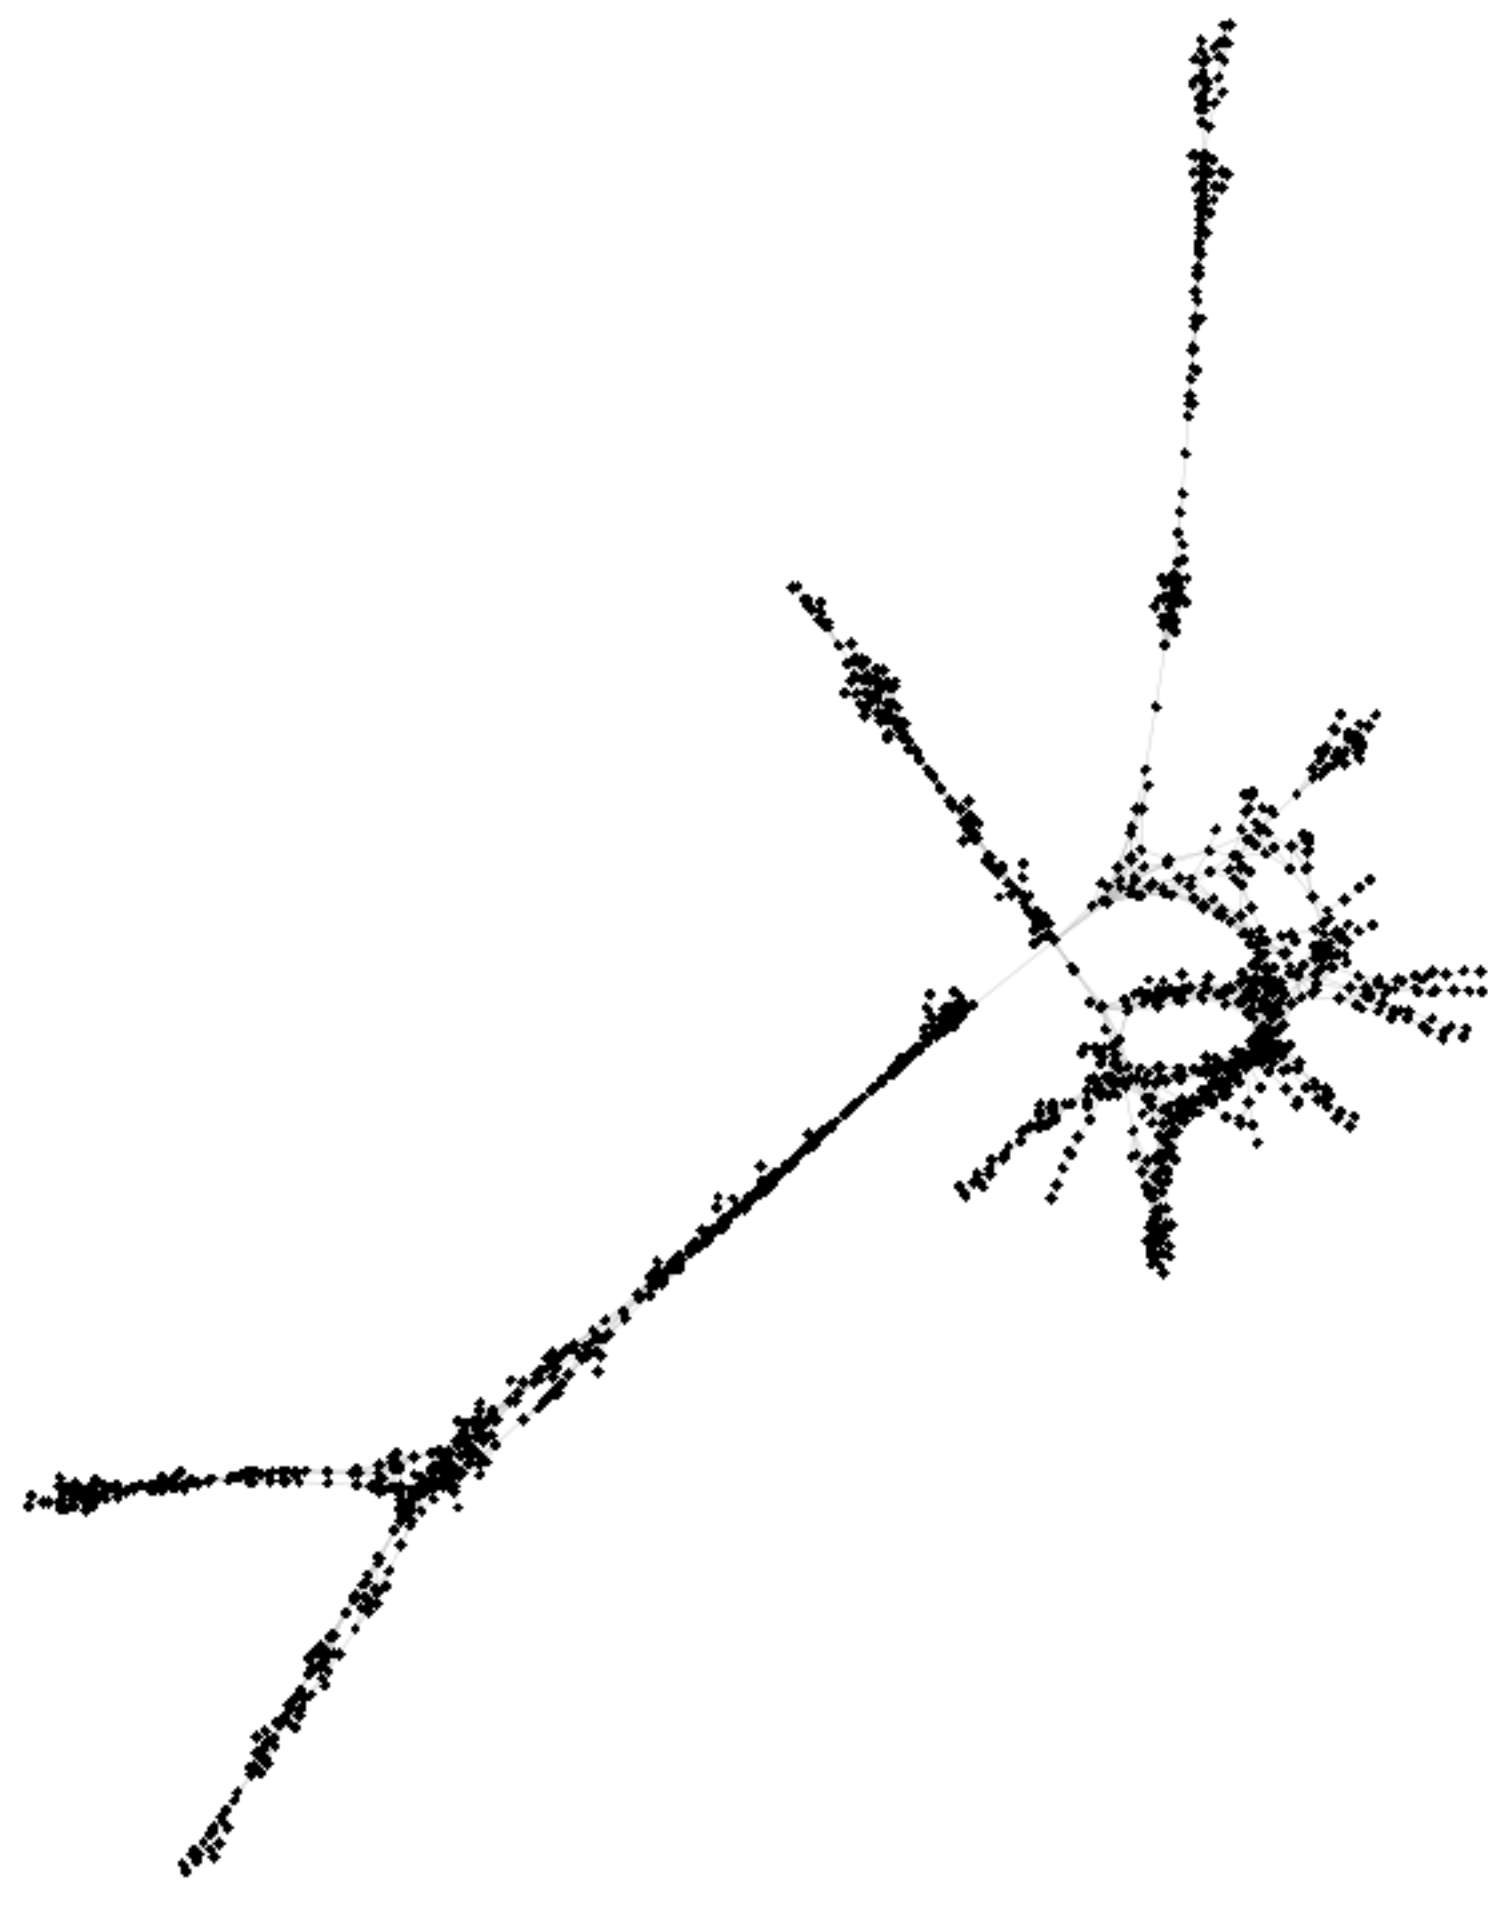

**CL122**

Number of reads: 1447  
 Number of pairs: 7778  
 Density: 0.007435  
 Diameter: NA  
 Mean edge weight: 158.18  
 Max. degree: 49

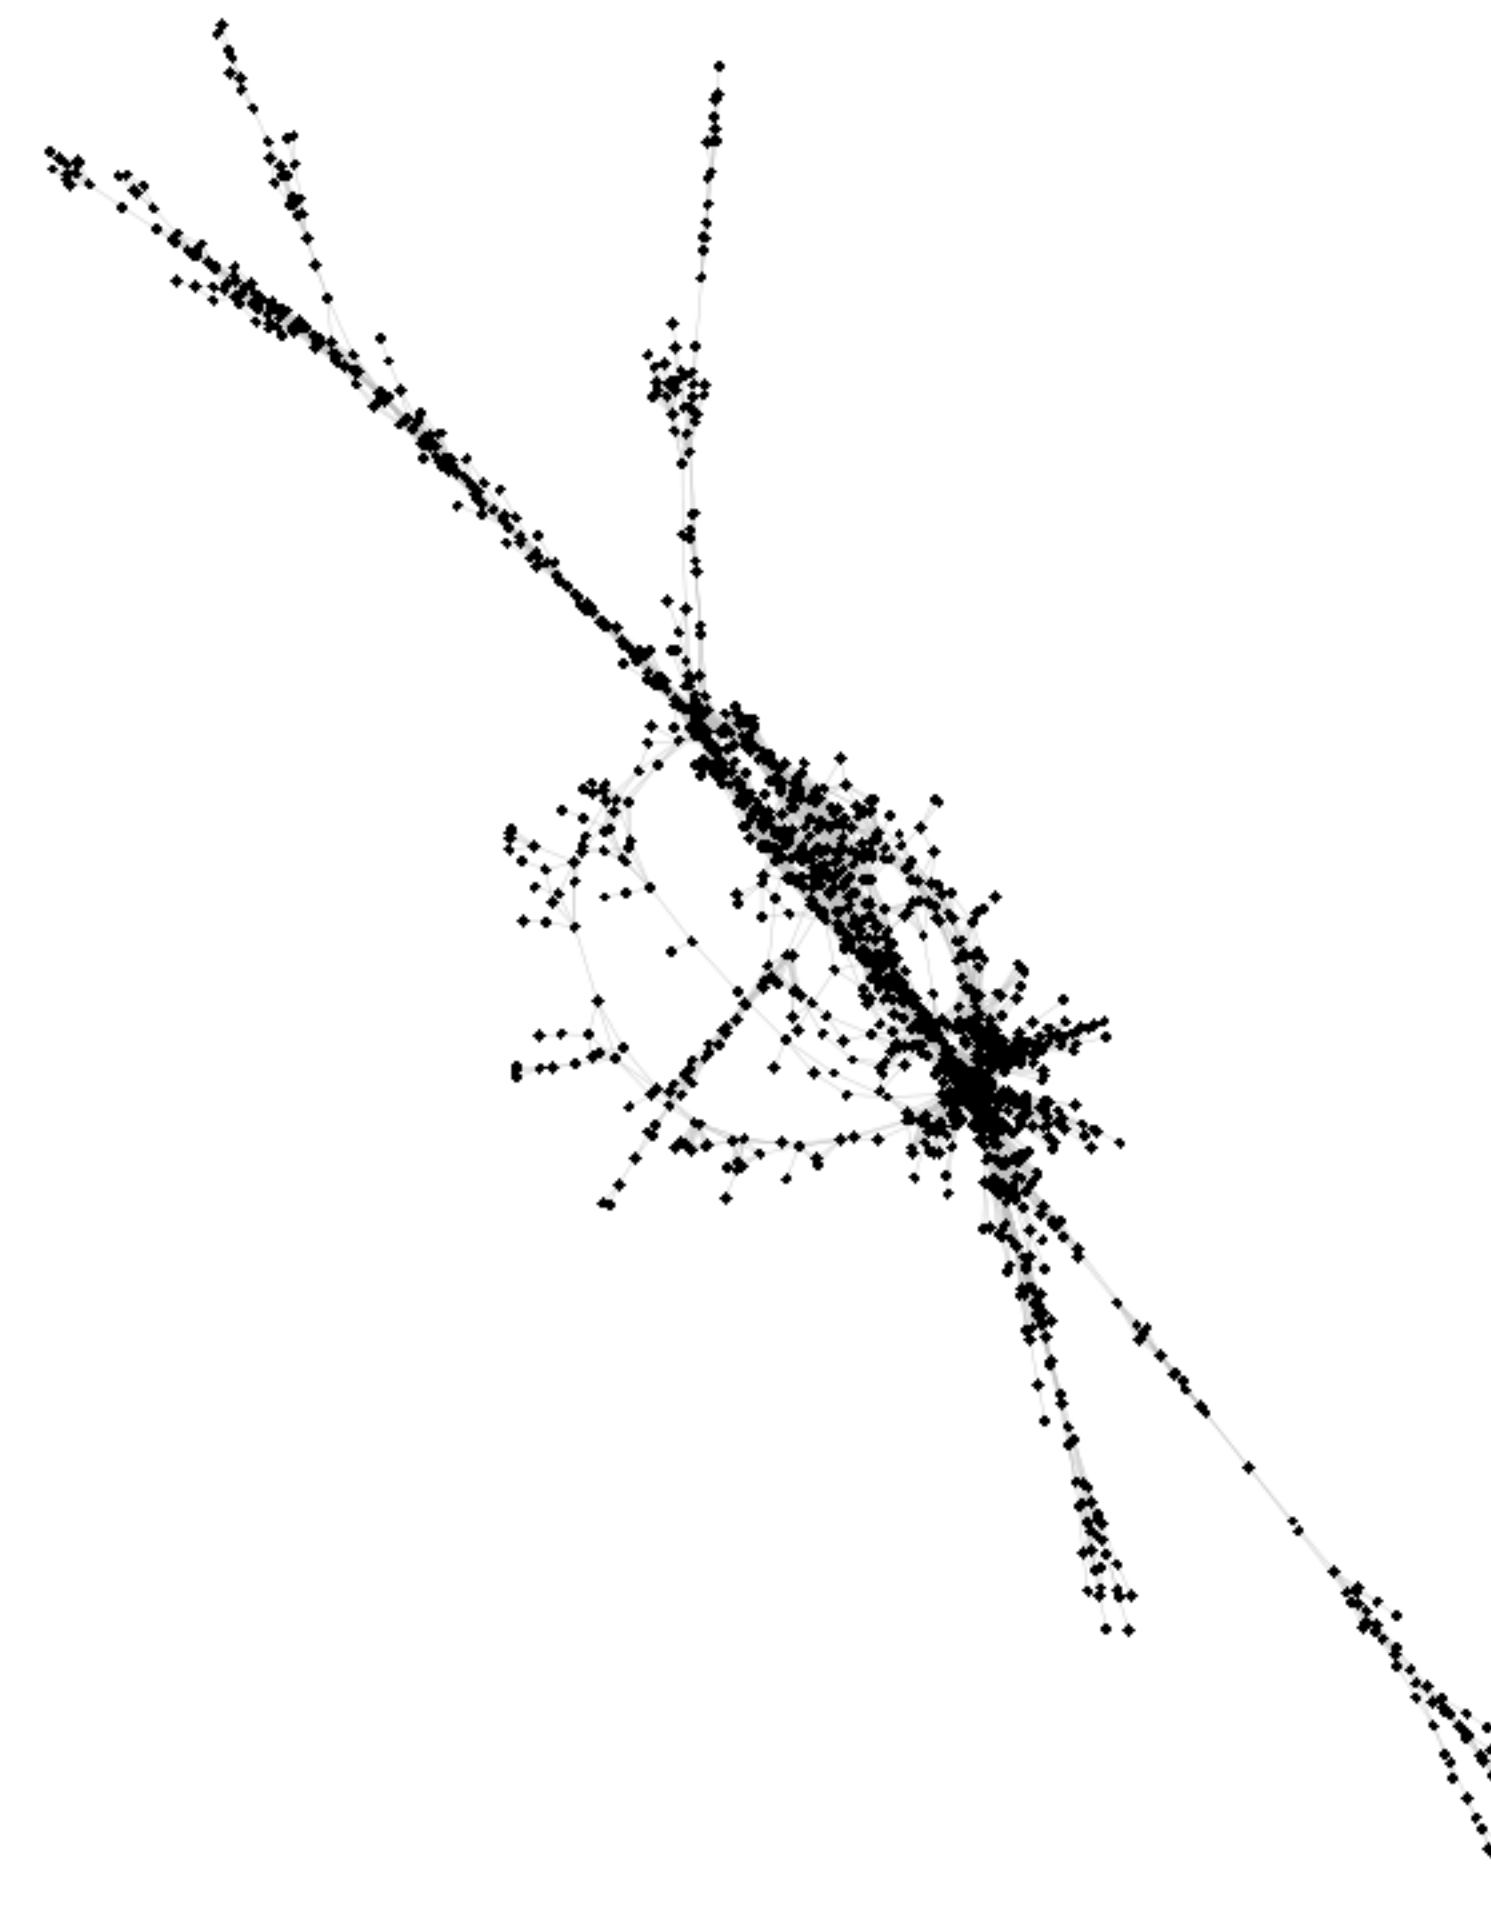

**CL123**

Number of reads: 1446  
 Number of pairs: 12750  
 Density: 0.0122  
 Diameter: NA  
 Mean edge weight: 156.17  
 Max. degree: 133

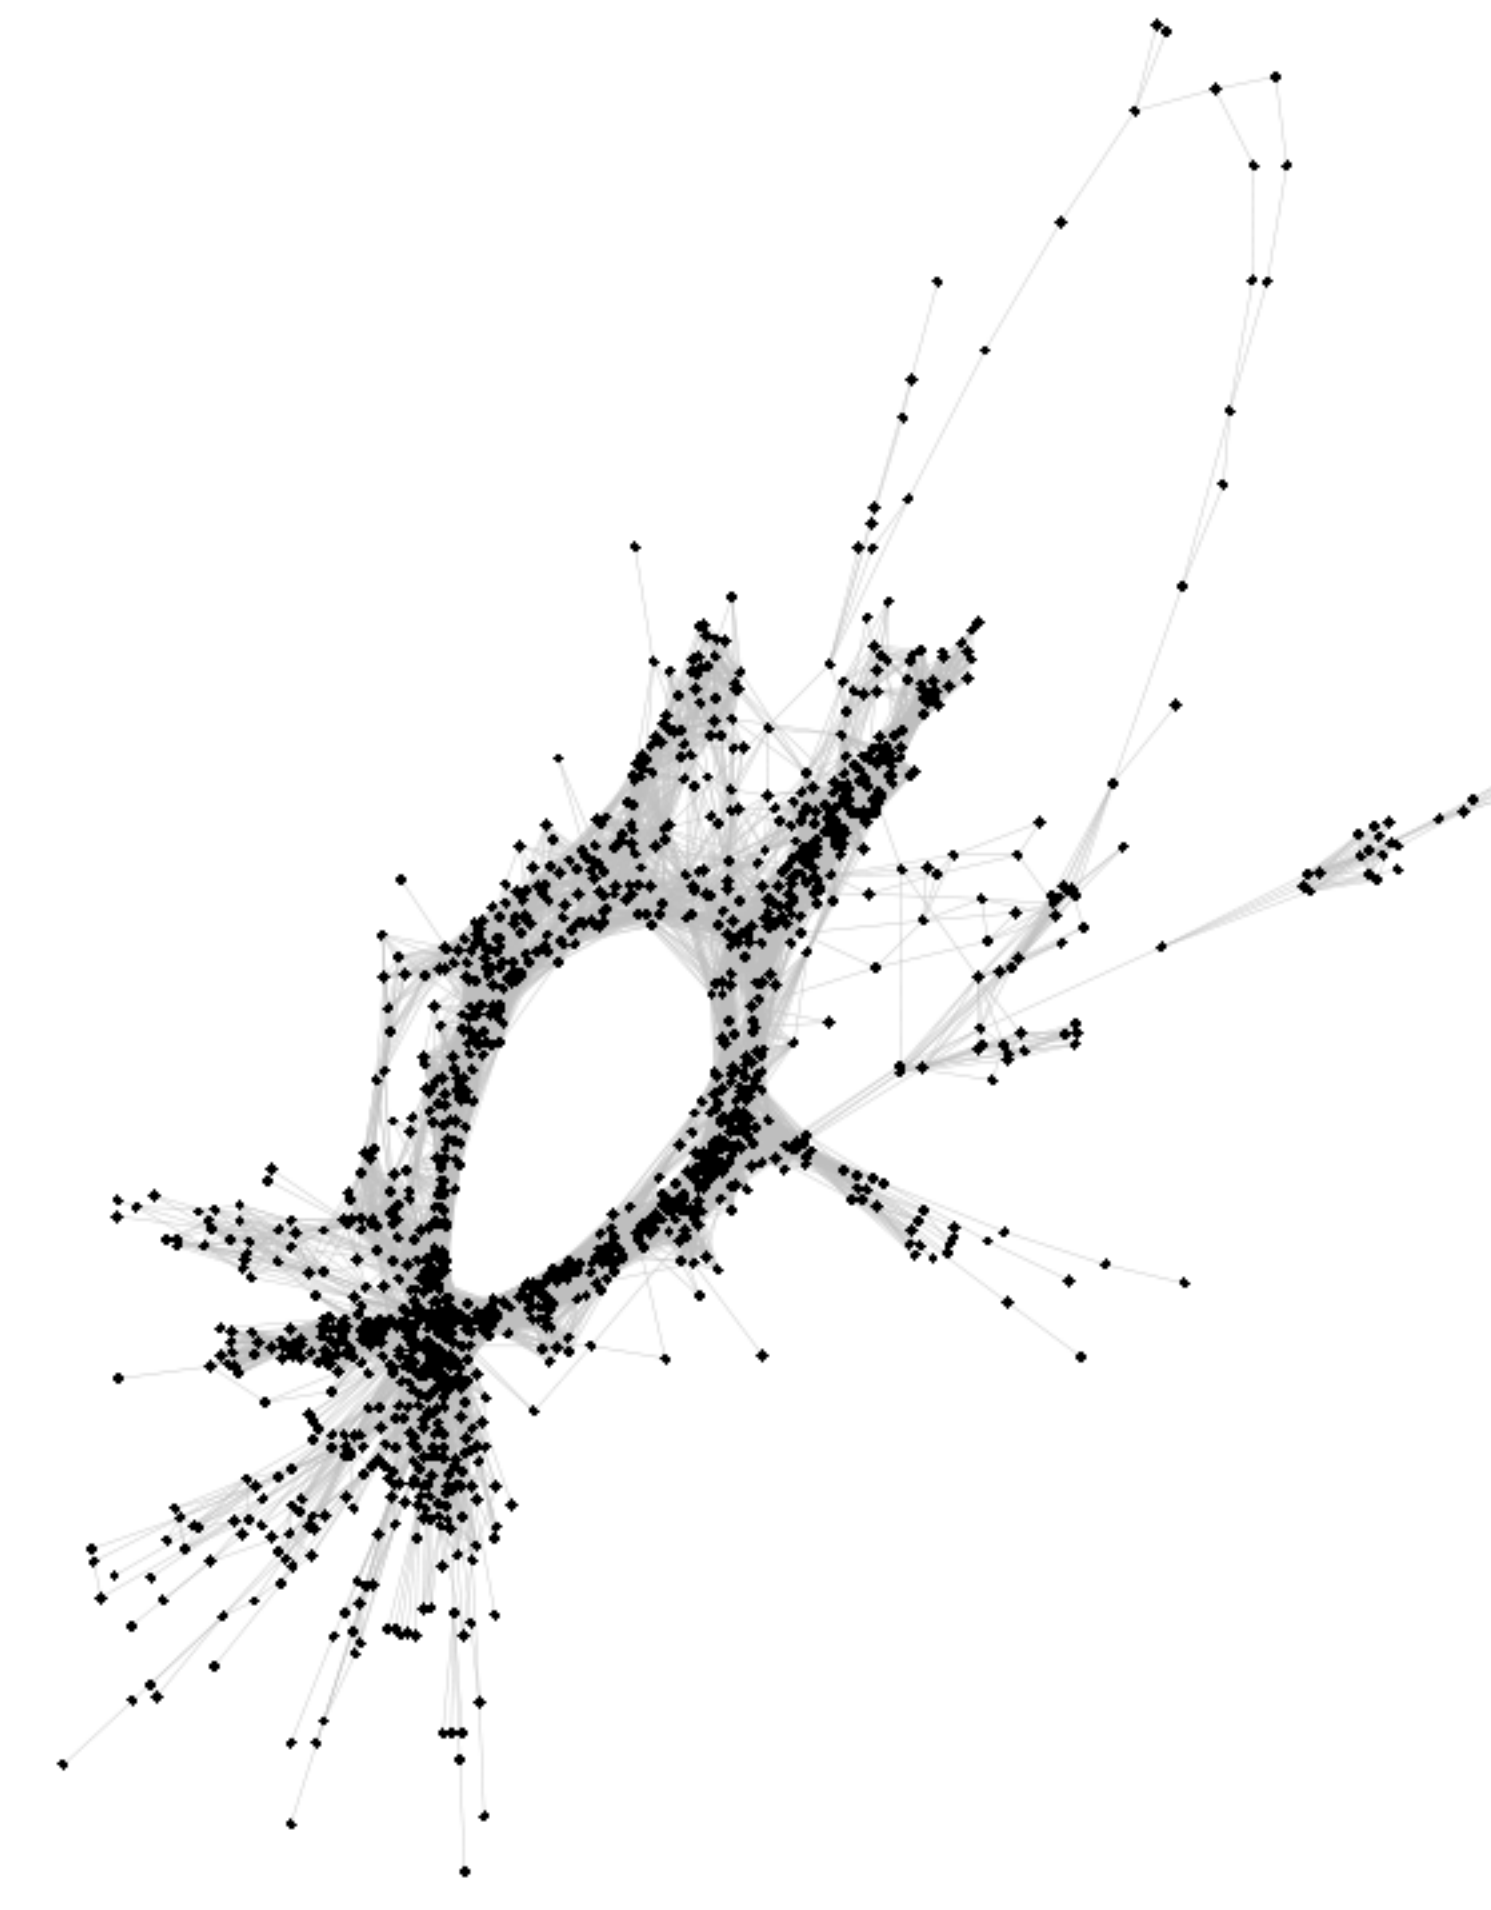

**CL124**

Number of reads: 1417  
 Number of pairs: 32321  
 Density: 0.03222  
 Diameter: NA  
 Mean edge weight: 156.39  
 Max. degree: 190

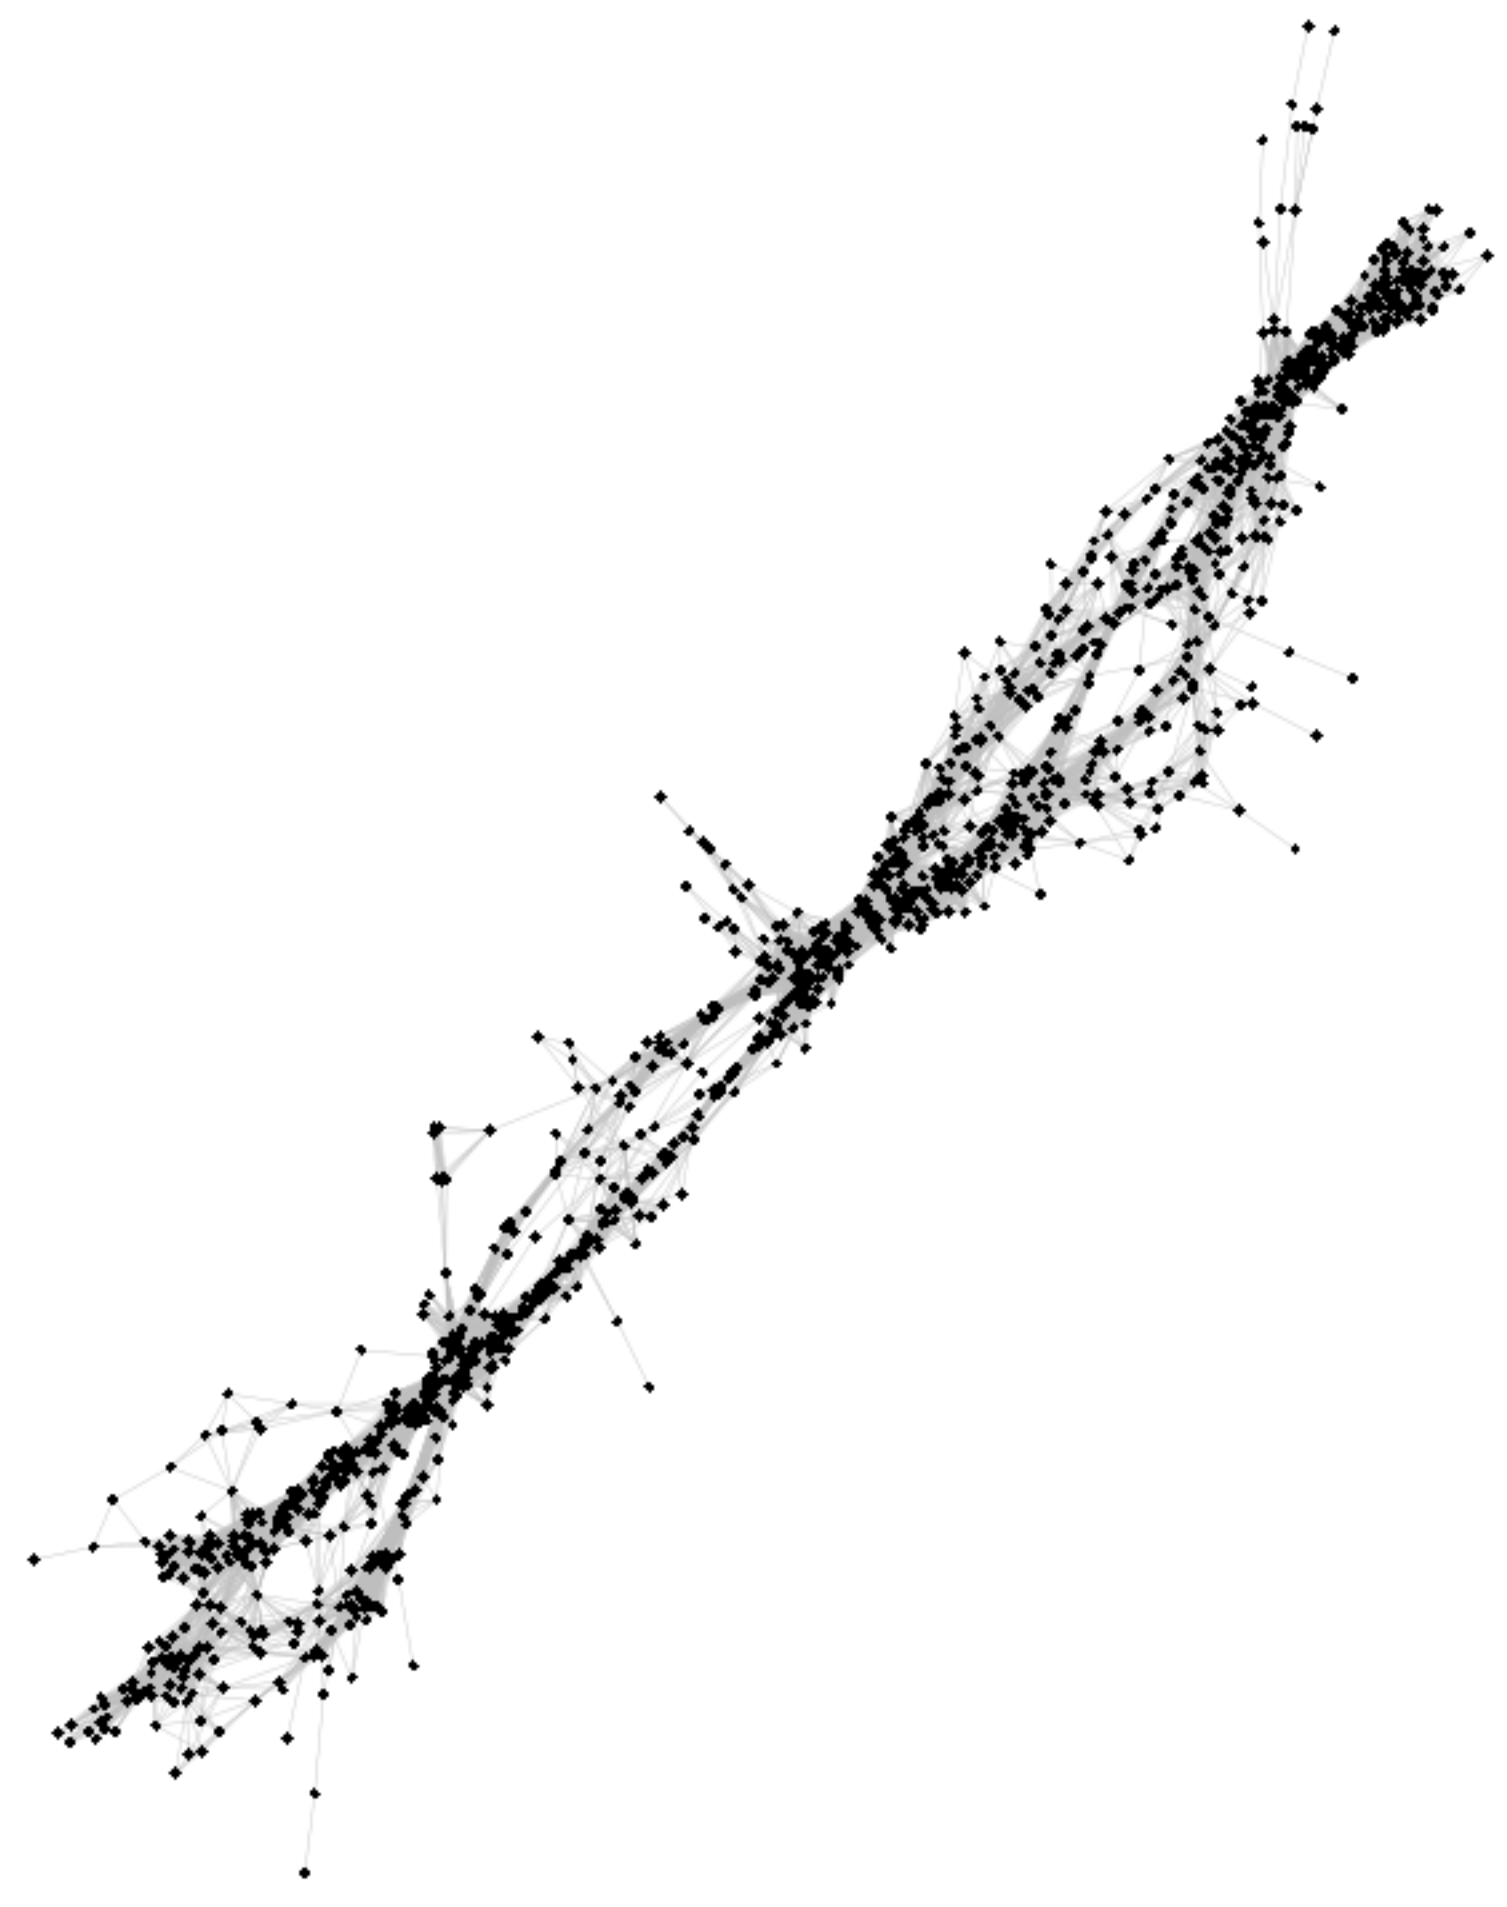

**CL125**

Number of reads: 1405  
 Number of pairs: 27751  
 Density: 0.02814  
 Diameter: NA  
 Mean edge weight: 160.71  
 Max. degree: 107

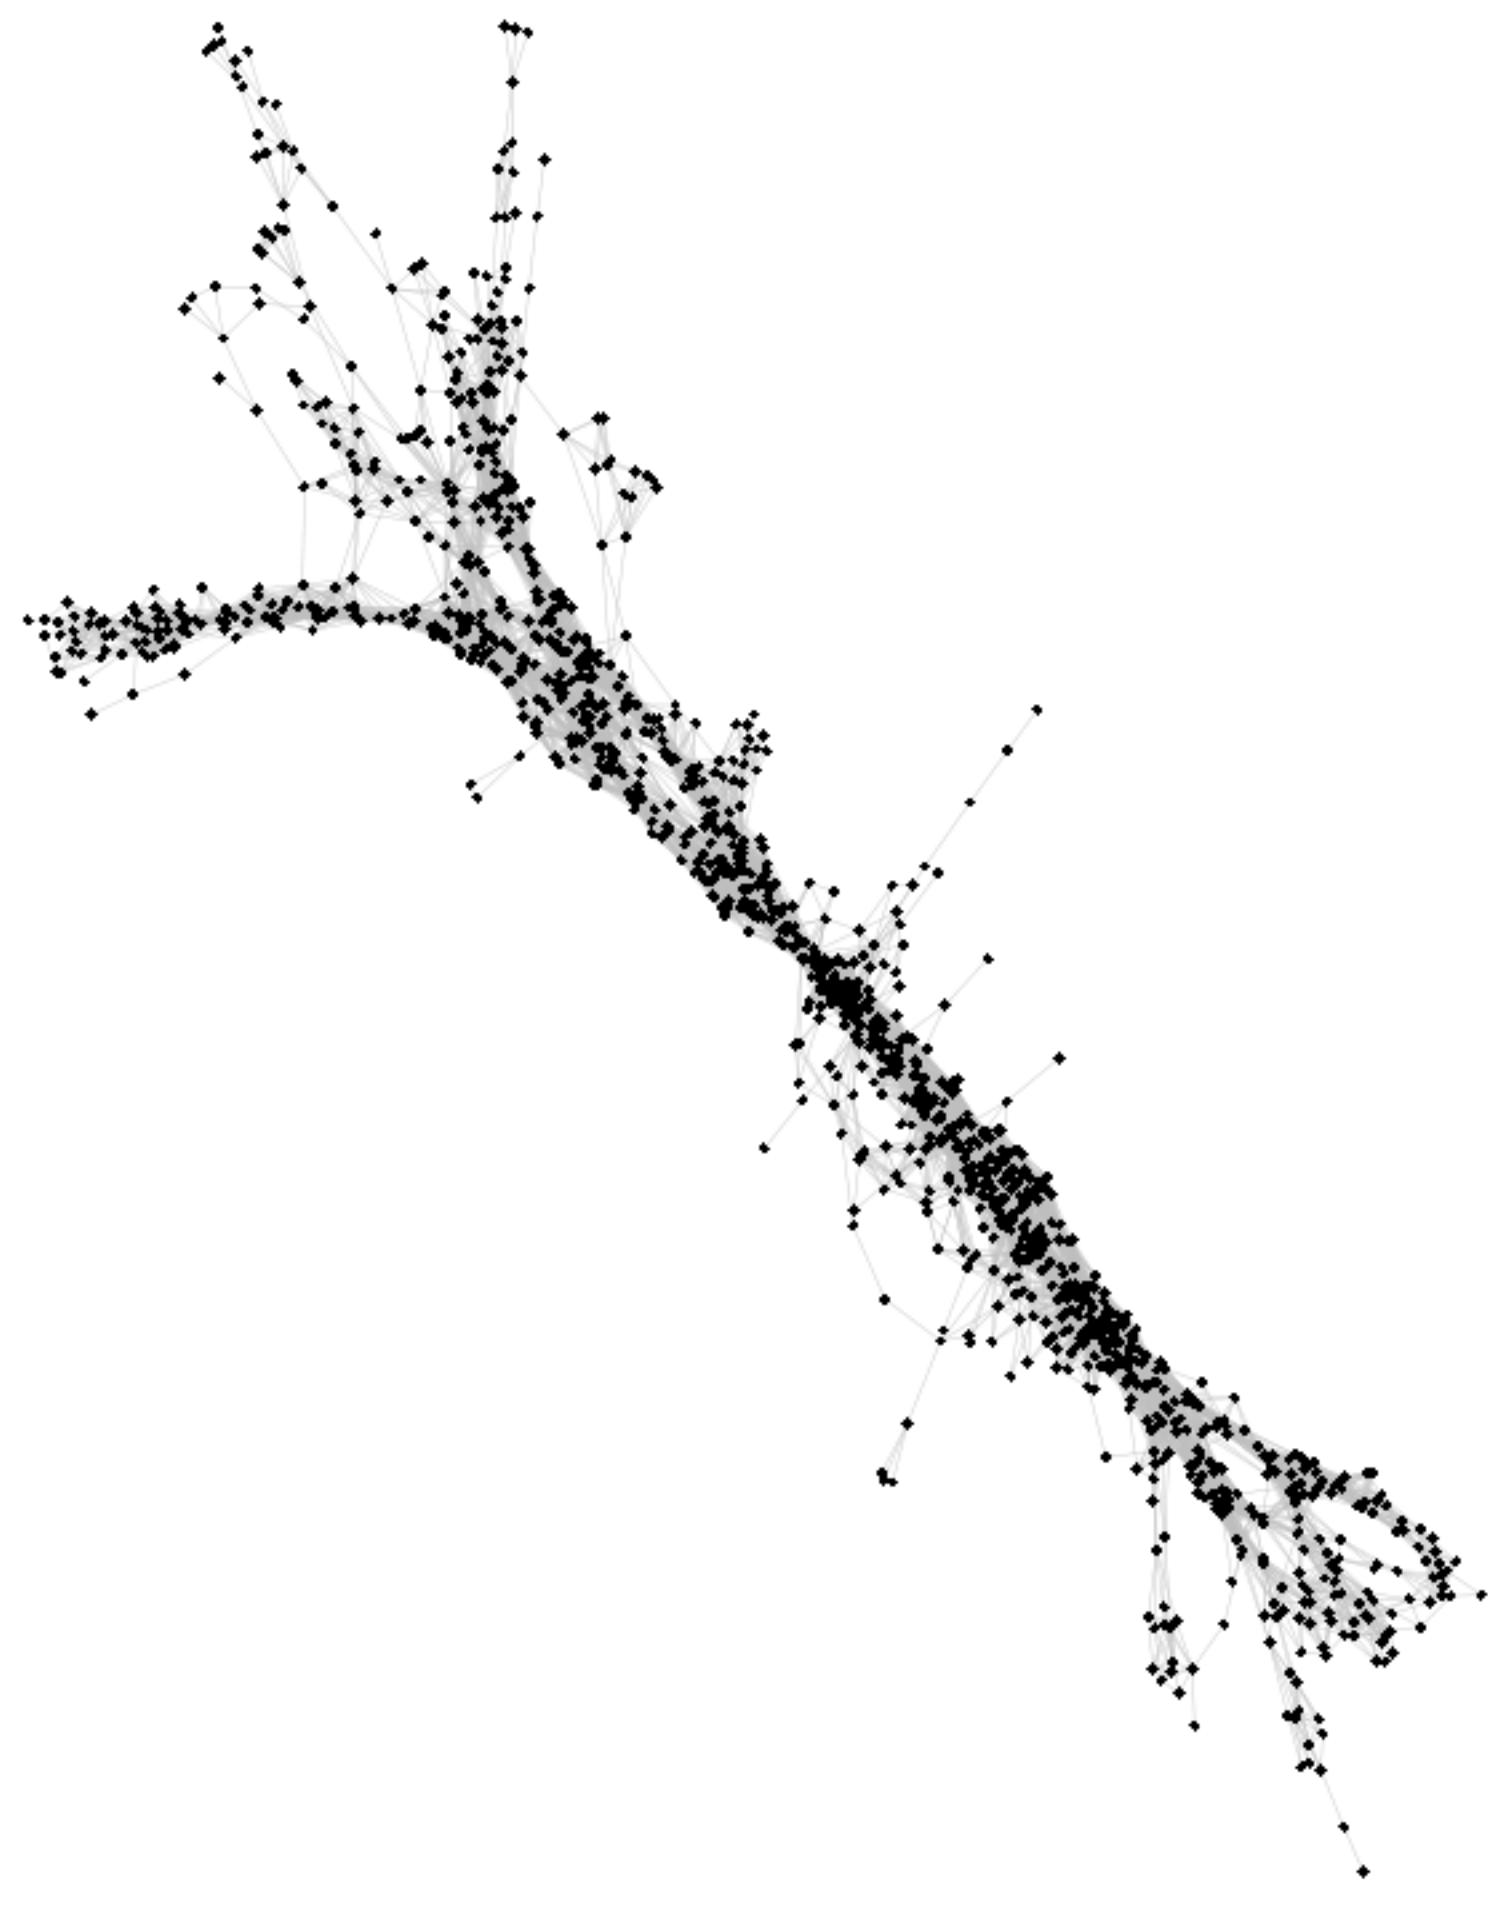

**CL126**

Number of reads: 1321  
 Number of pairs: 19165  
 Density: 0.02198  
 Diameter: NA  
 Mean edge weight: 156.79  
 Max. degree: 88

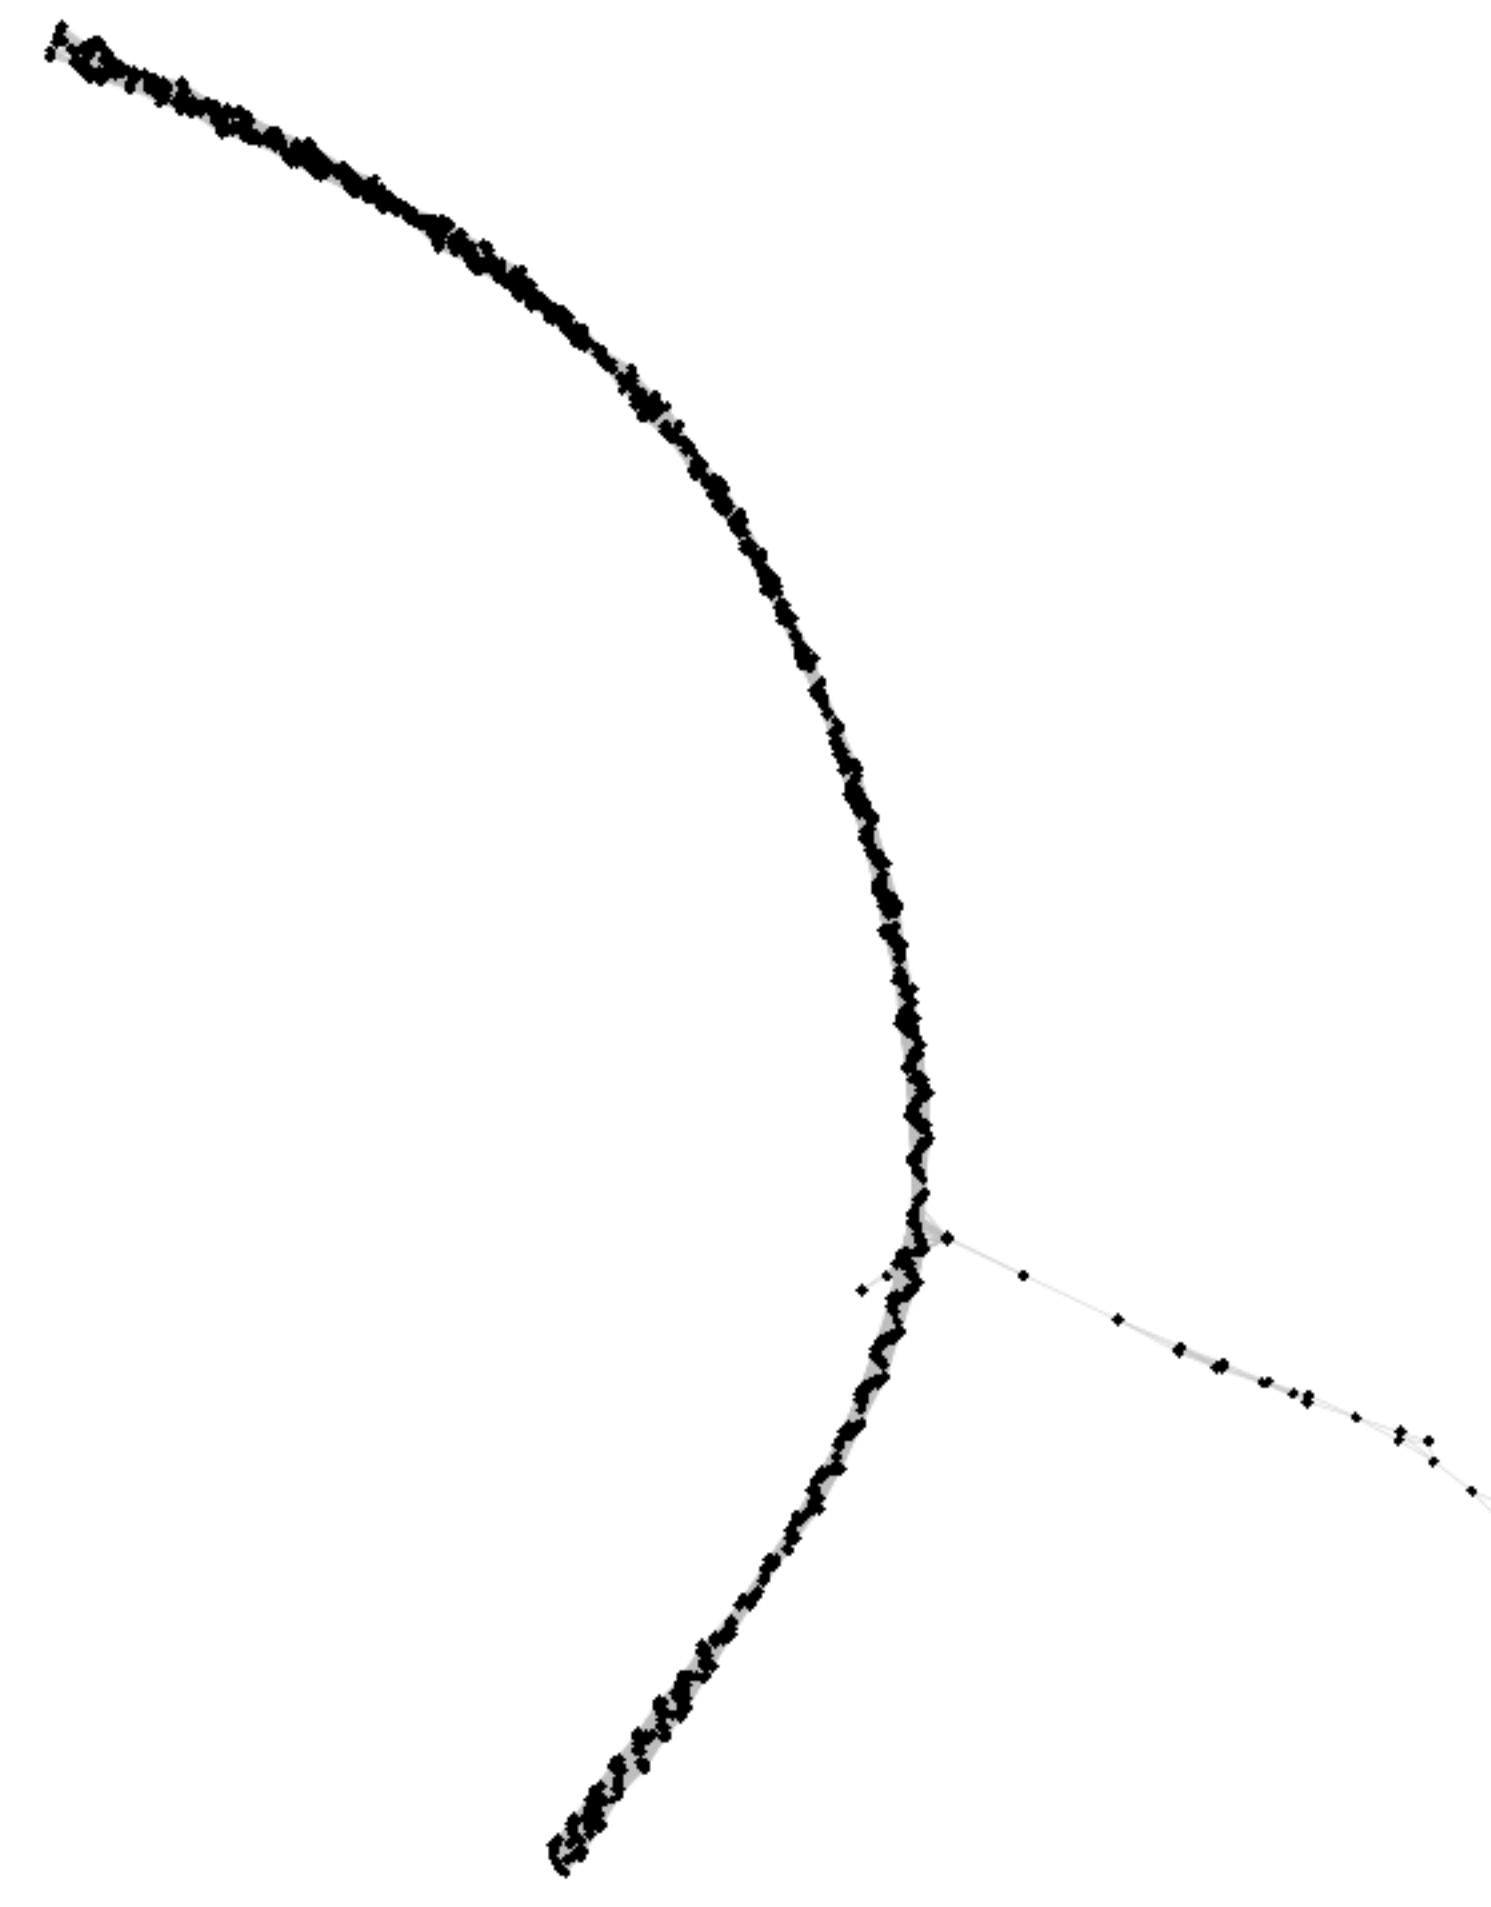

**CL127**

Number of reads: 1317  
 Number of pairs: 37175  
 Density: 0.0429  
 Diameter: NA  
 Mean edge weight: 215  
 Max. degree: 82

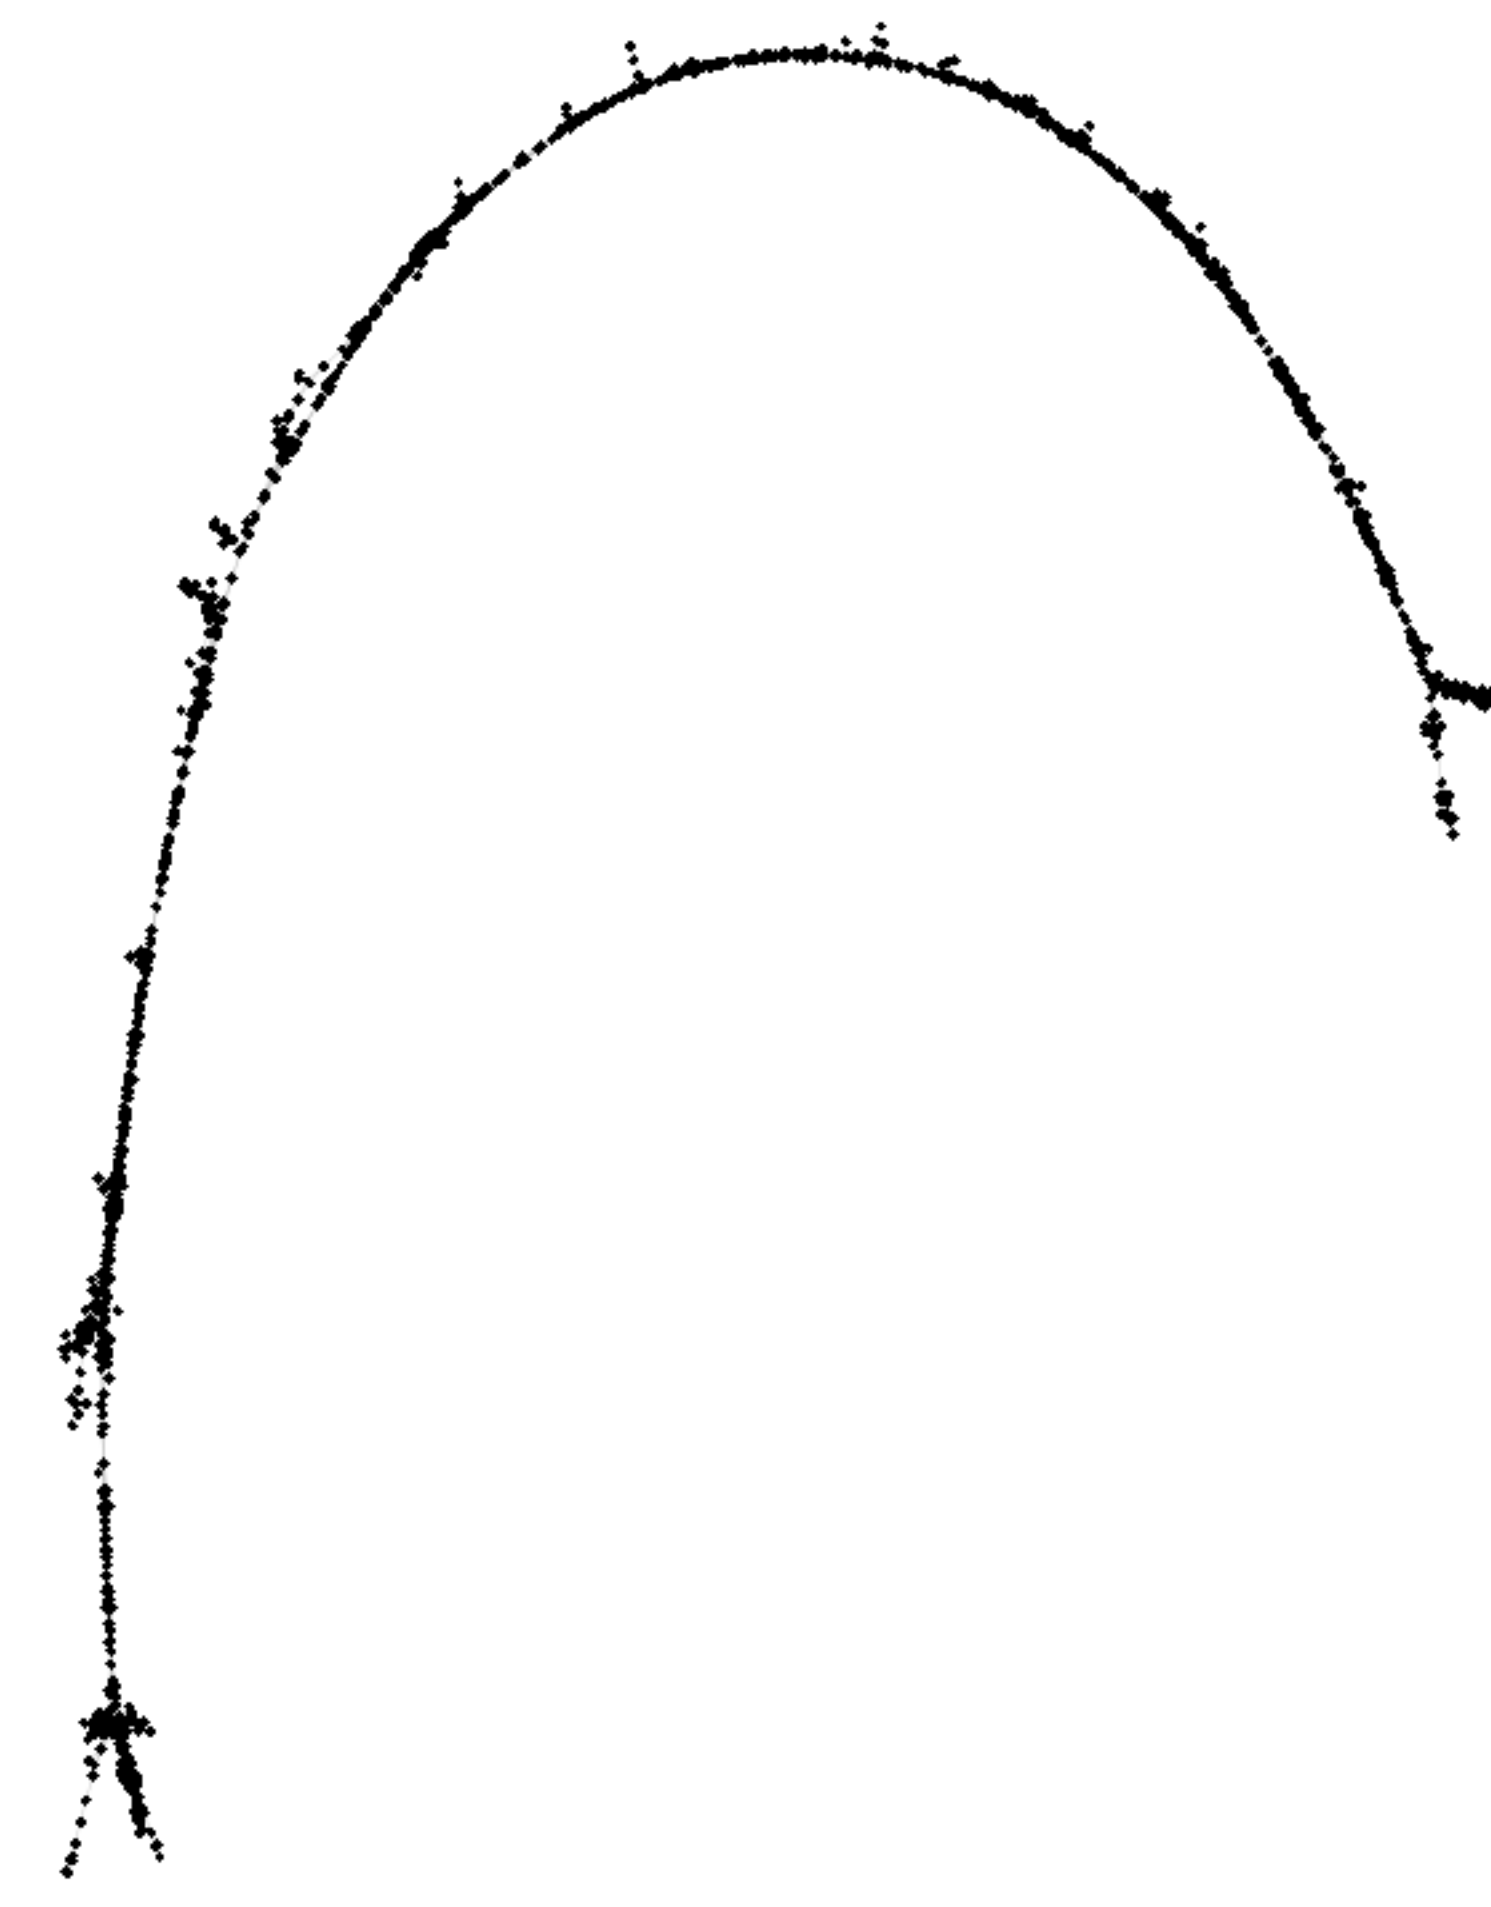

**CL128**

Number of reads: 1298  
 Number of pairs: 10212  
 Density: 0.01213  
 Diameter: NA  
 Mean edge weight: 181.53  
 Max. degree: 48

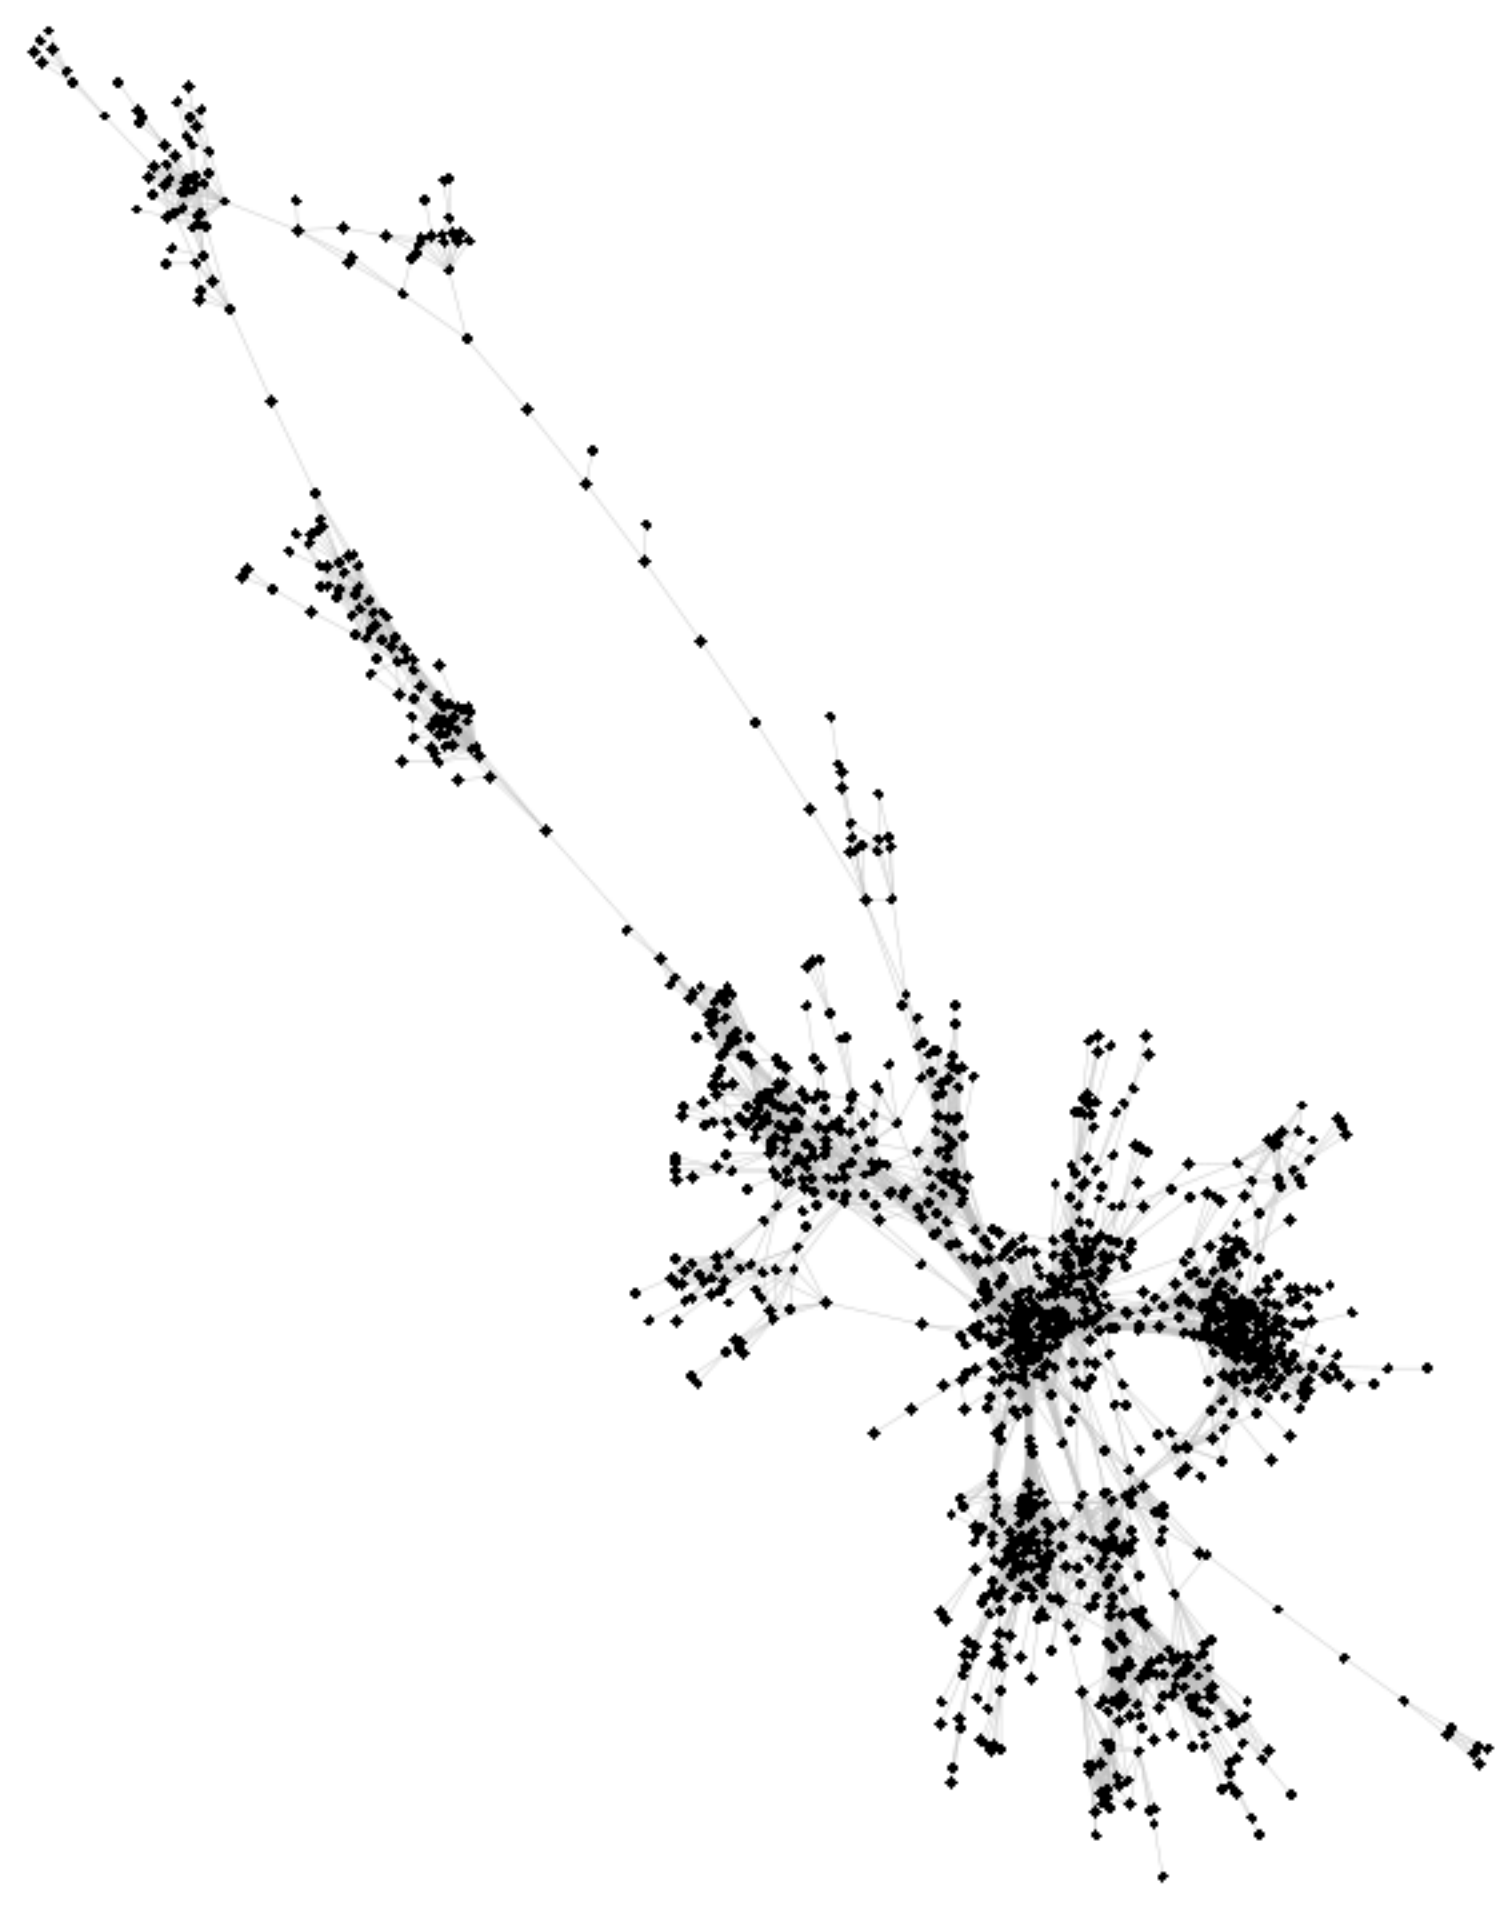

**CL129**

Number of reads: 1297  
 Number of pairs: 8441  
 Density: 0.01004  
 Diameter: NA  
 Mean edge weight: 141.4  
 Max. degree: 105

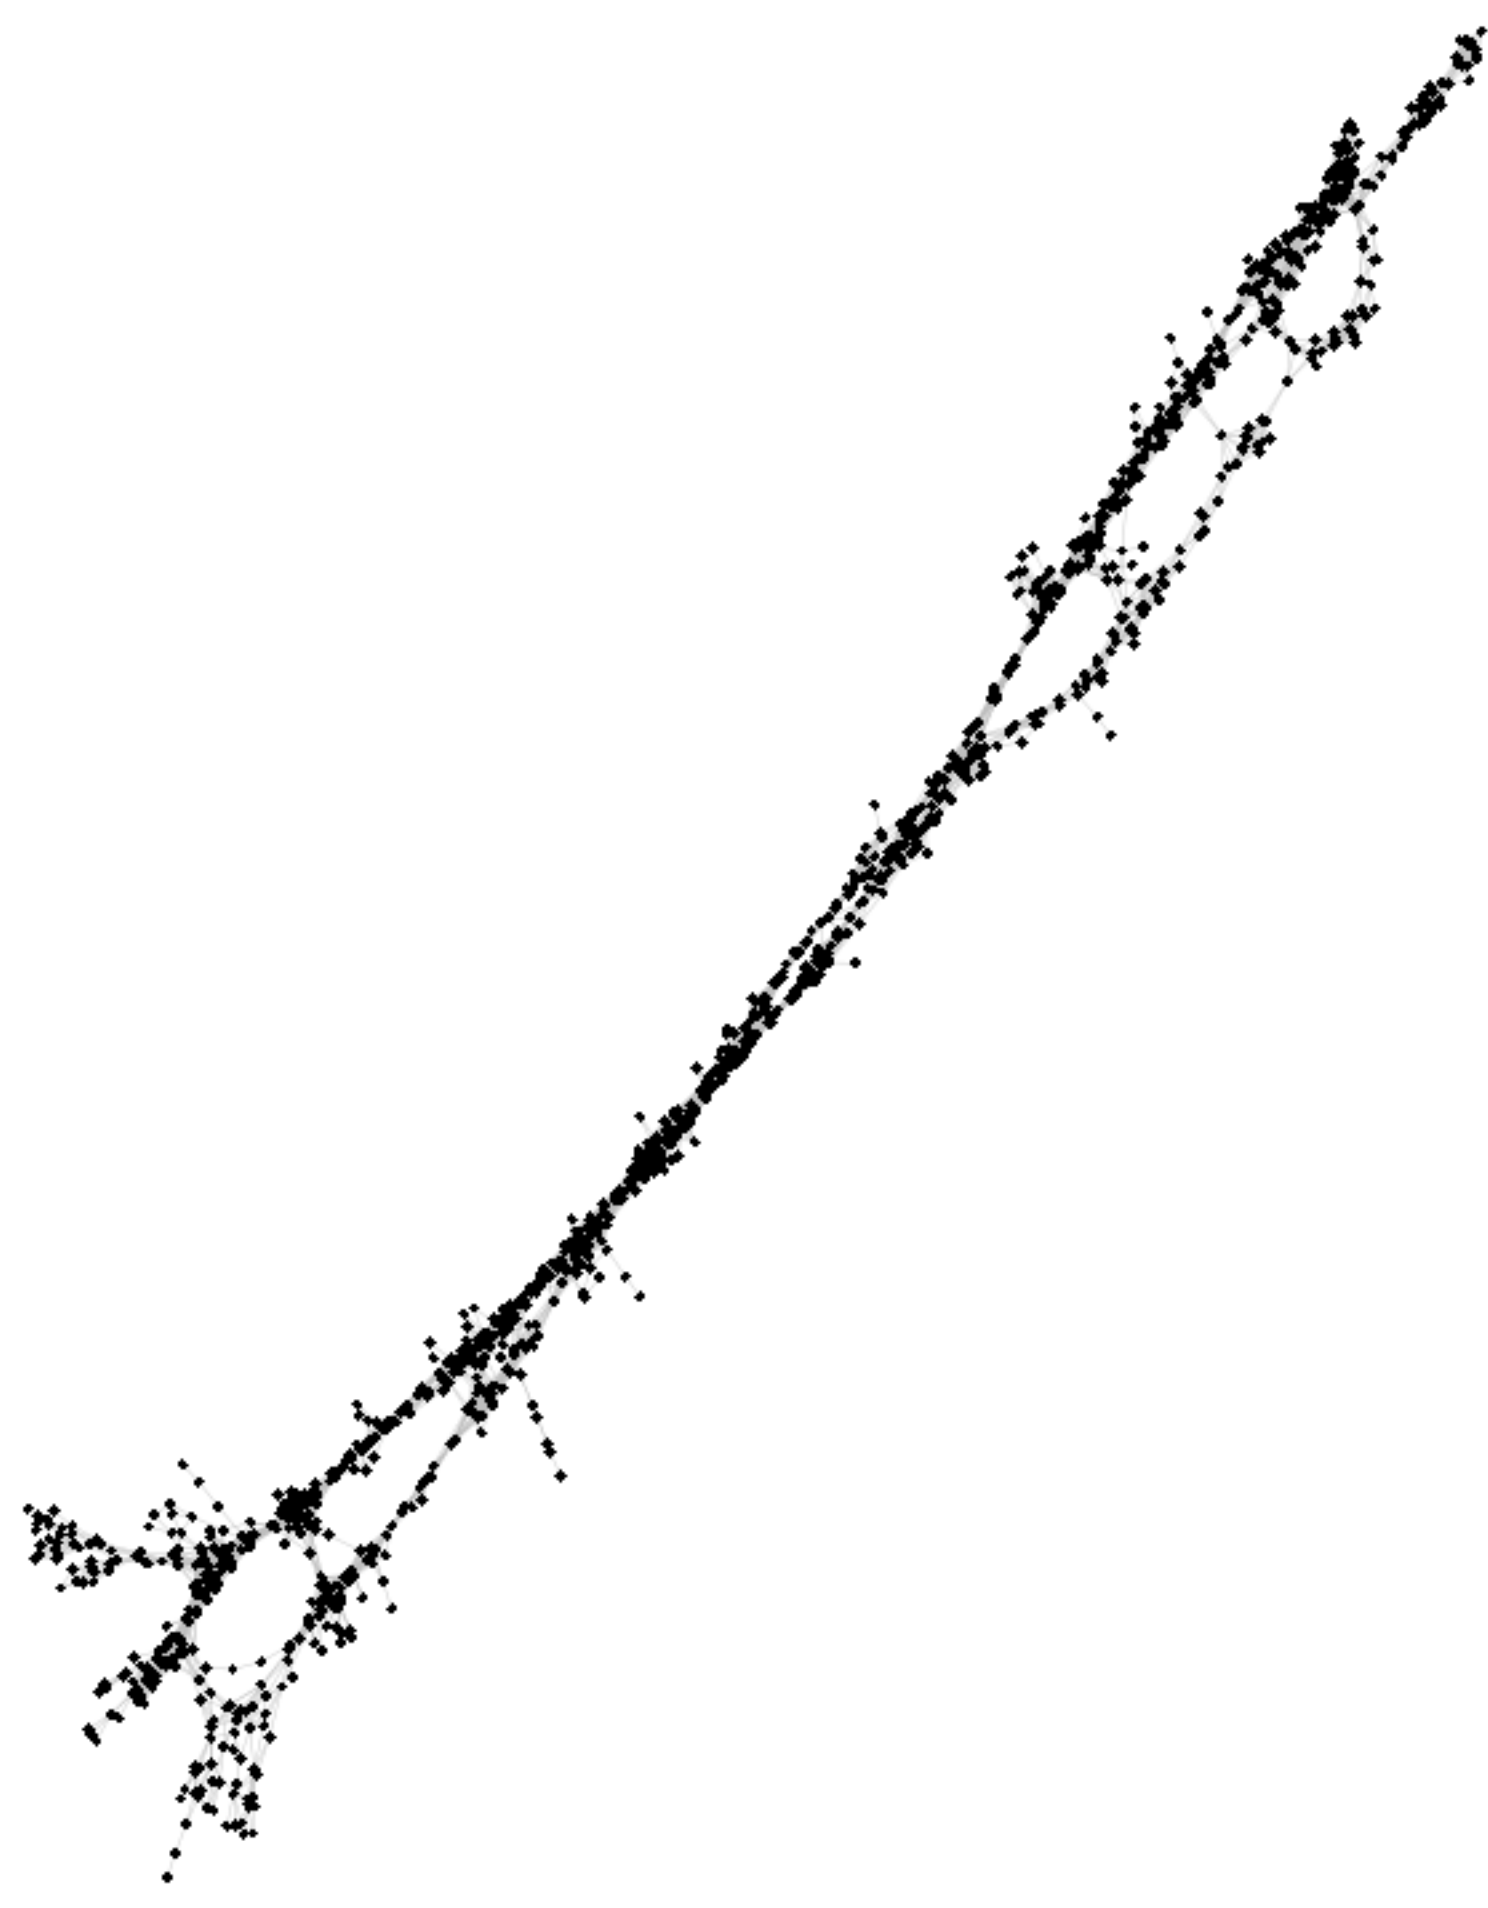

**CL130**

Number of reads: 1269  
 Number of pairs: 10648  
 Density: 0.01323  
 Diameter: NA  
 Mean edge weight: 164.56  
 Max. degree: 44

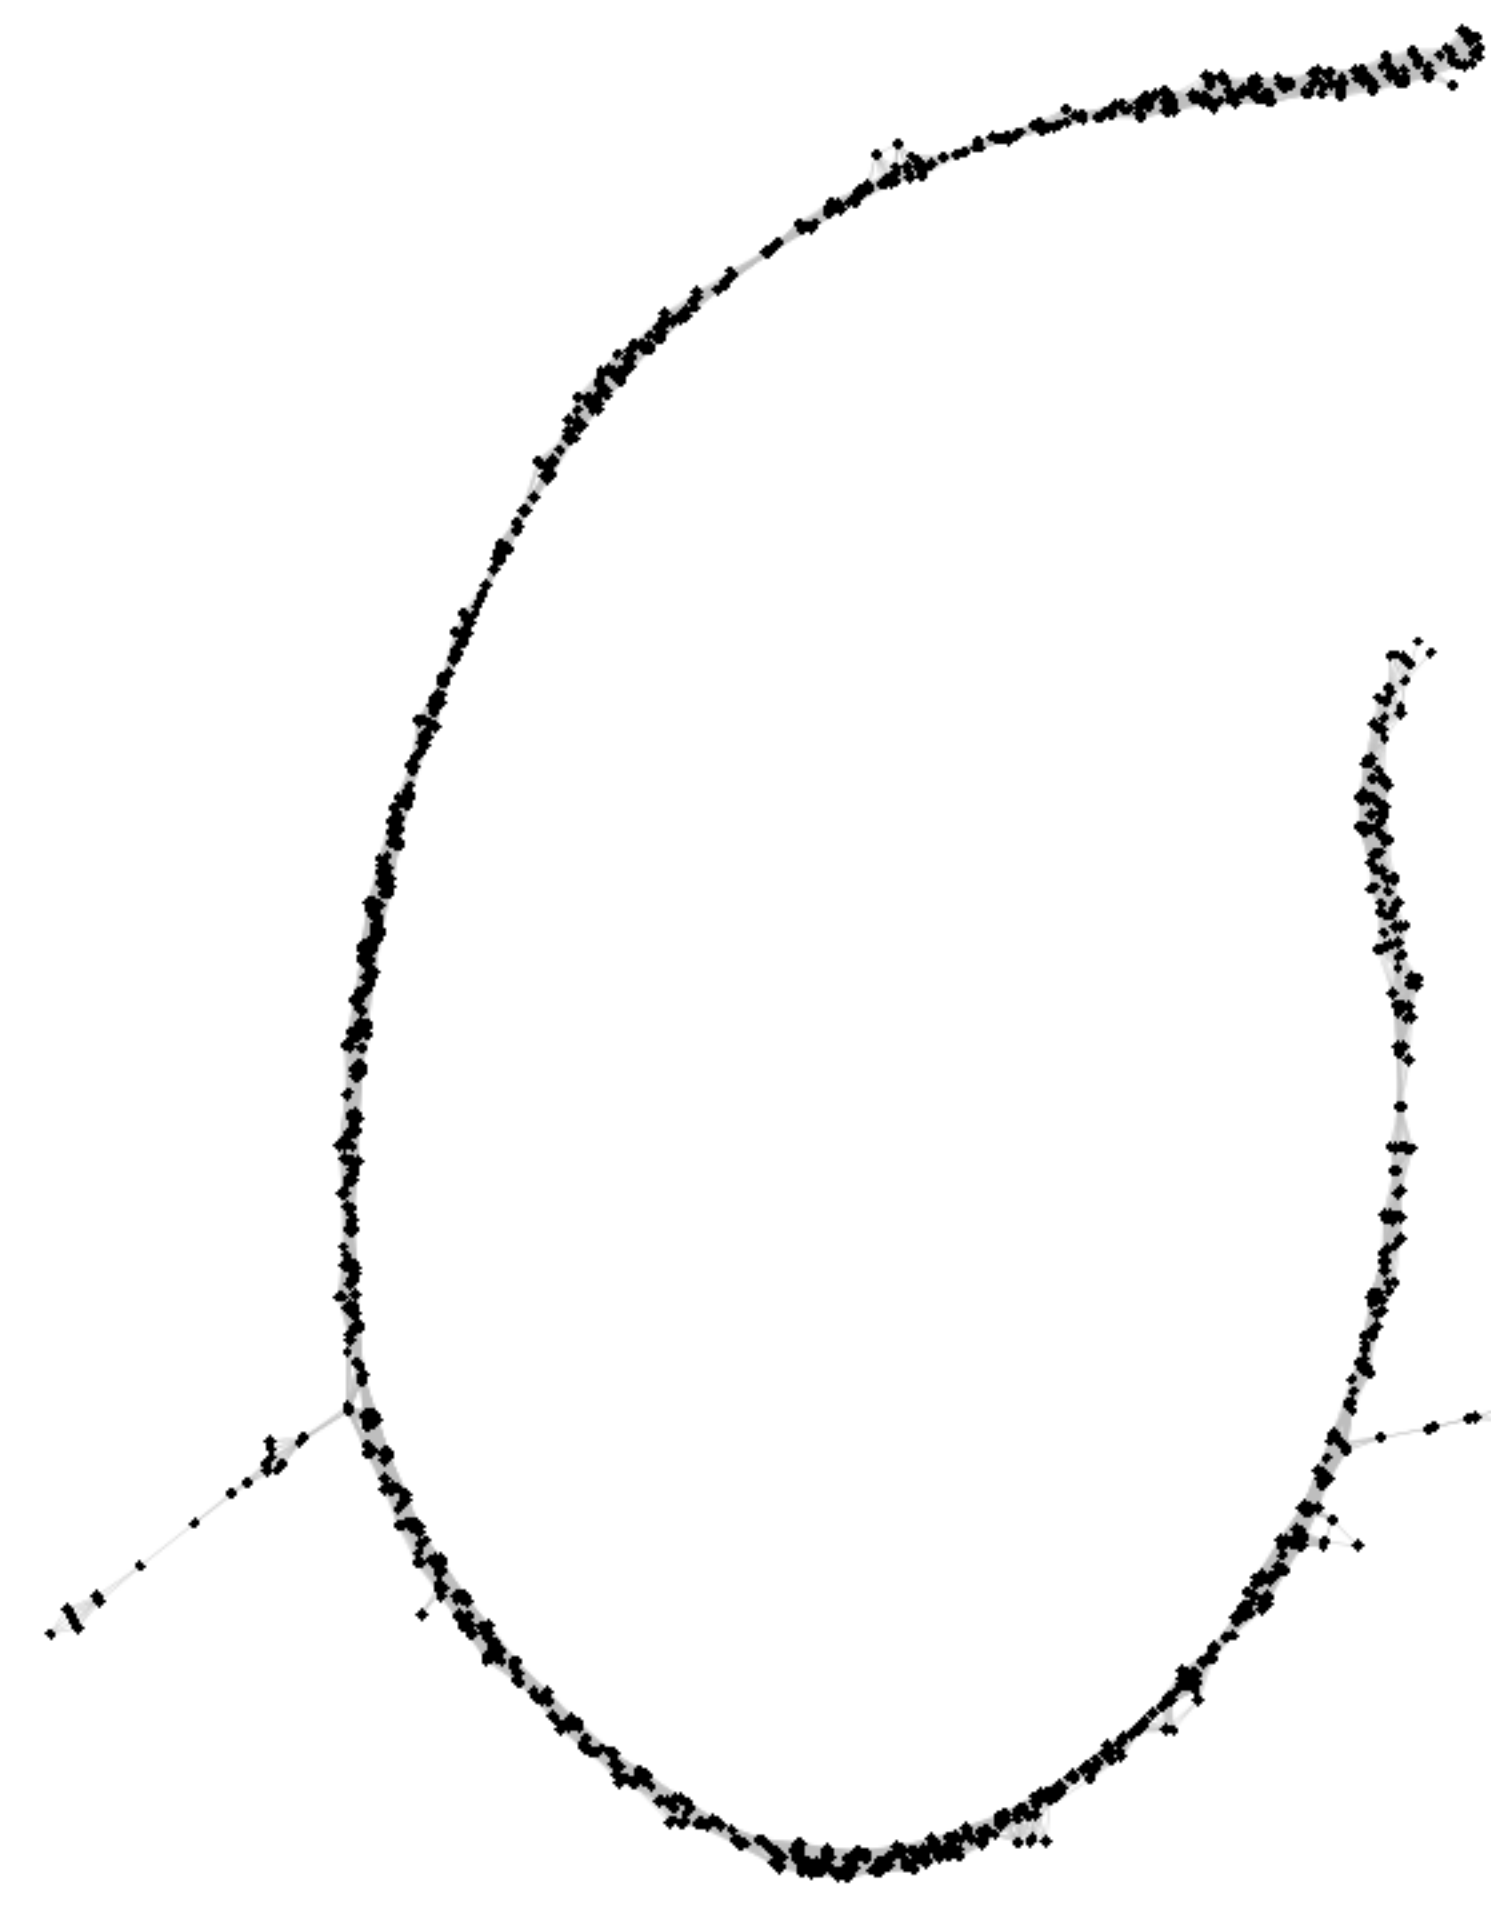

**CL131**

Number of reads: 1216  
 Number of pairs: 17384  
 Density: 0.02353  
 Diameter: NA  
 Mean edge weight: 214.38  
 Max. degree: 49

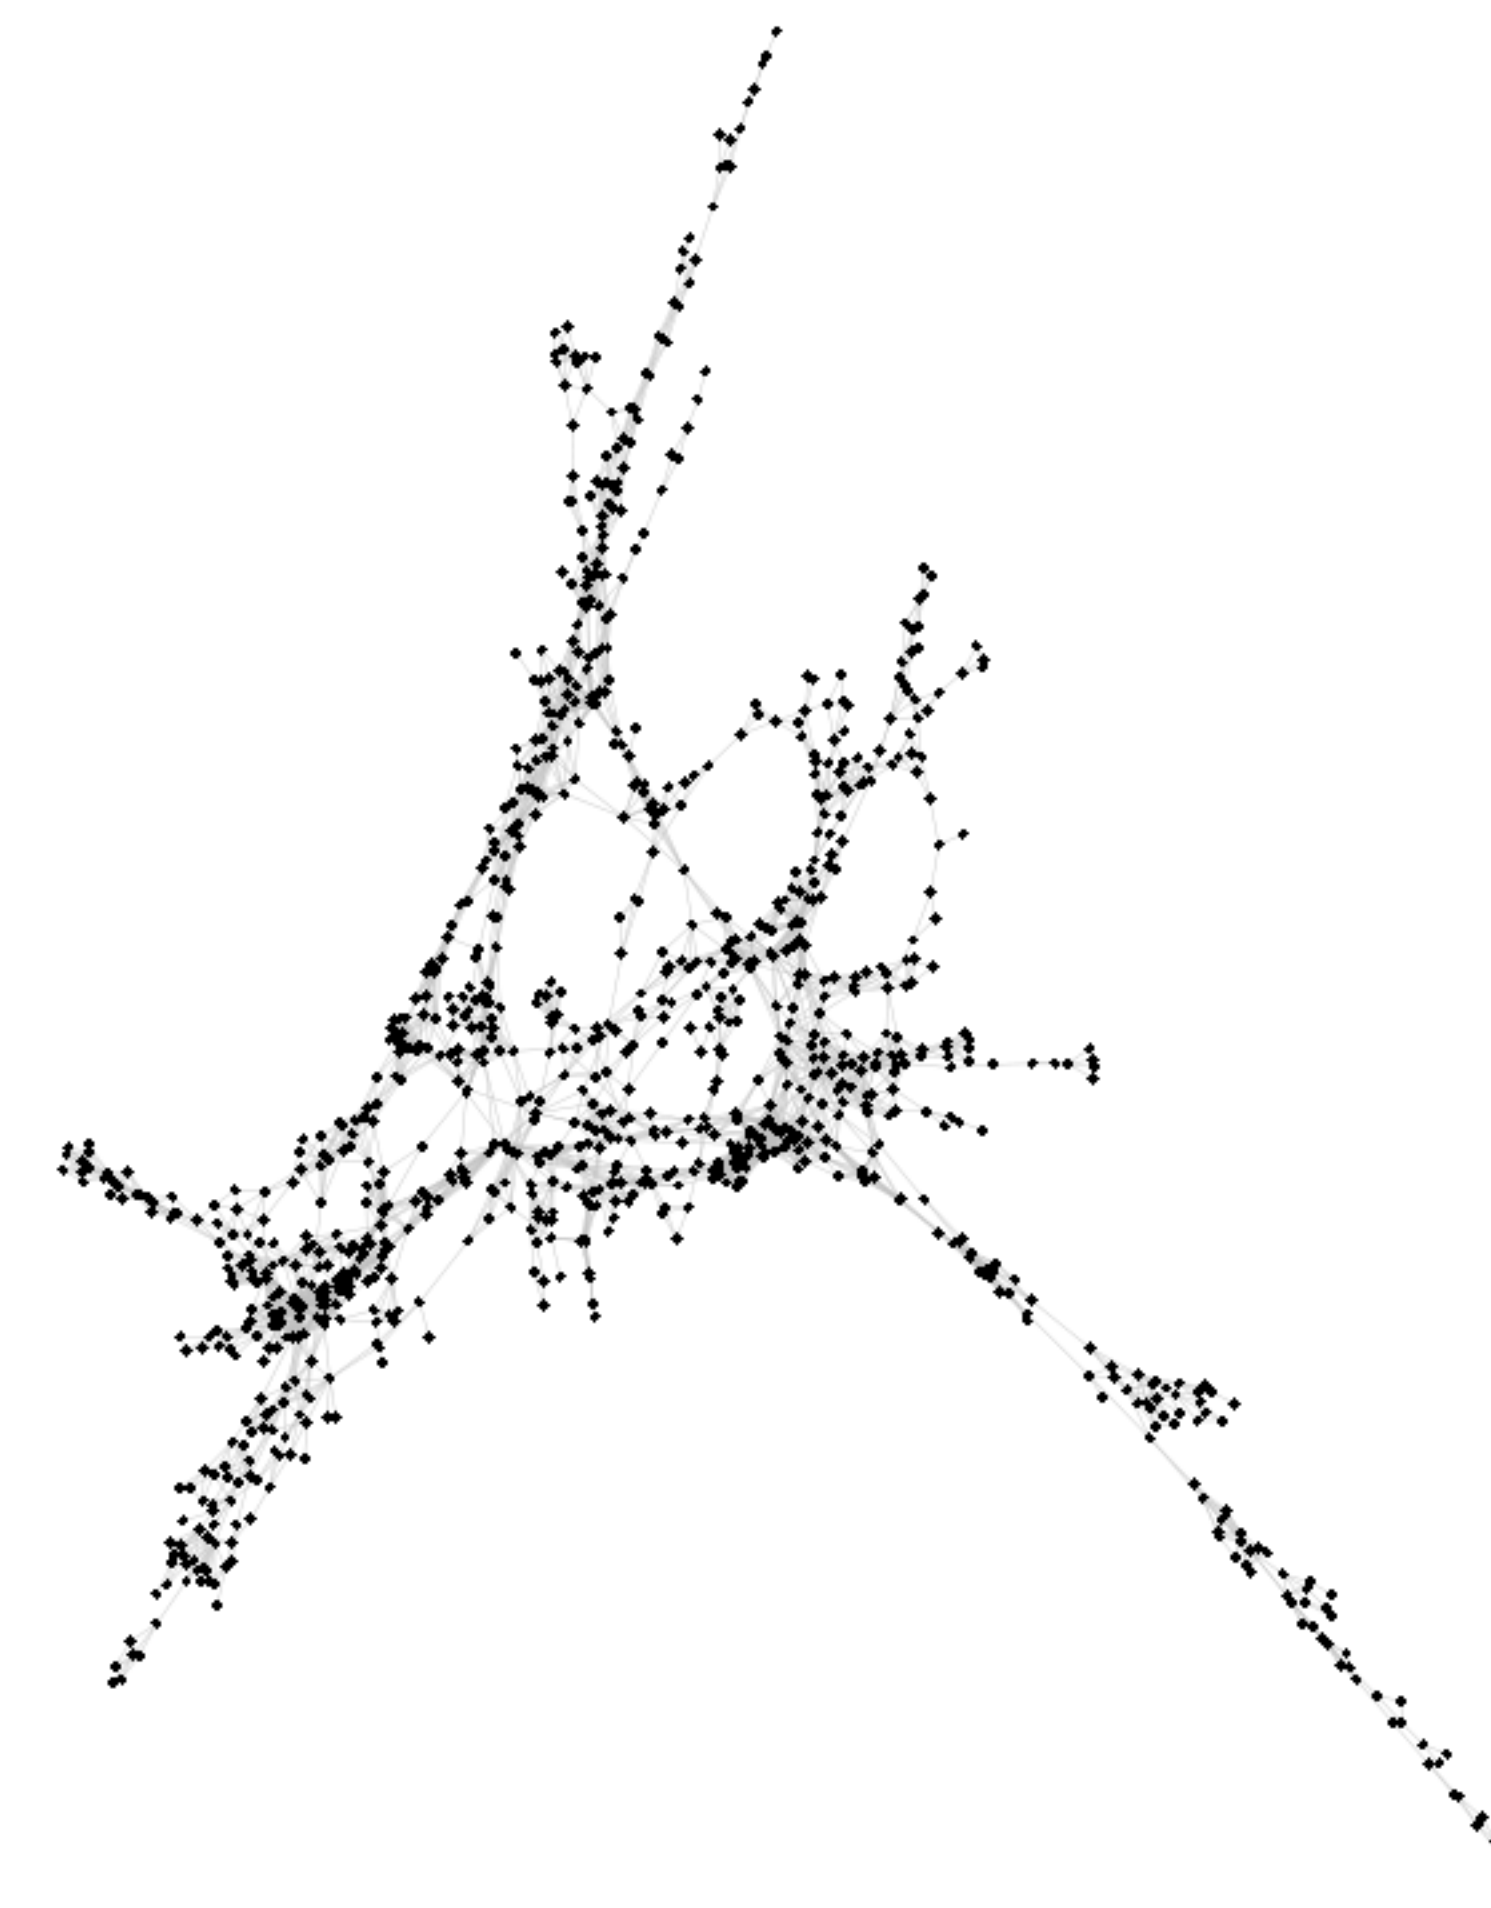

**CL132**

Number of reads: 1043  
 Number of pairs: 4444  
 Density: 0.008178  
 Diameter: NA  
 Mean edge weight: 160.55  
 Max. degree: 35

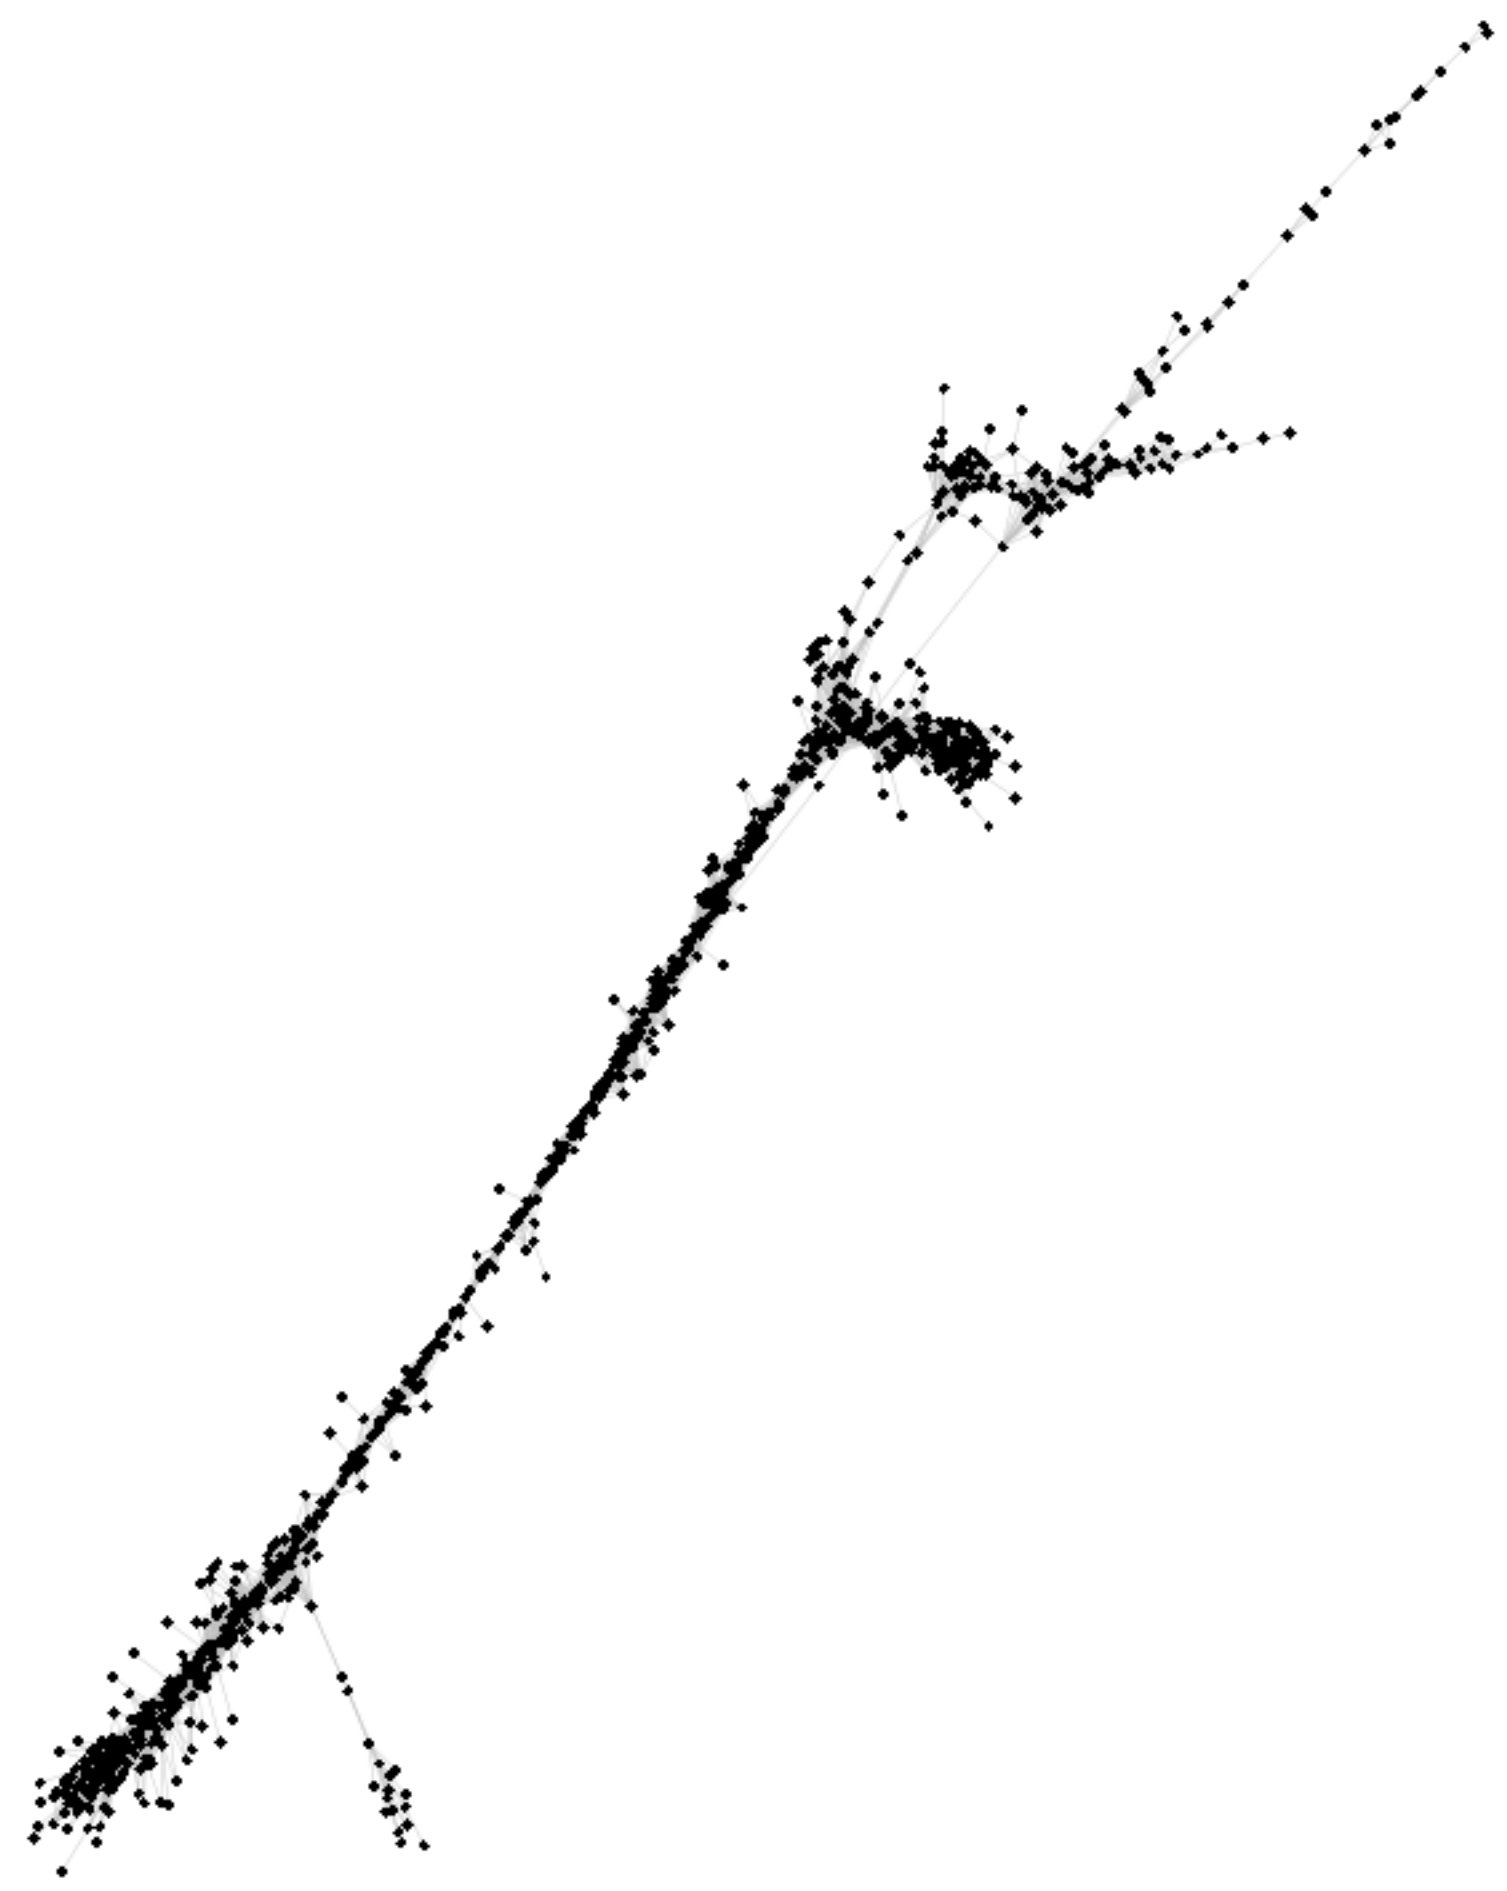

**CL133**

Number of reads: 995  
Number of pairs: 13700  
Density: 0.0277  
Diameter: NA  
Mean edge weight: 153.16  
Max. degree: 81

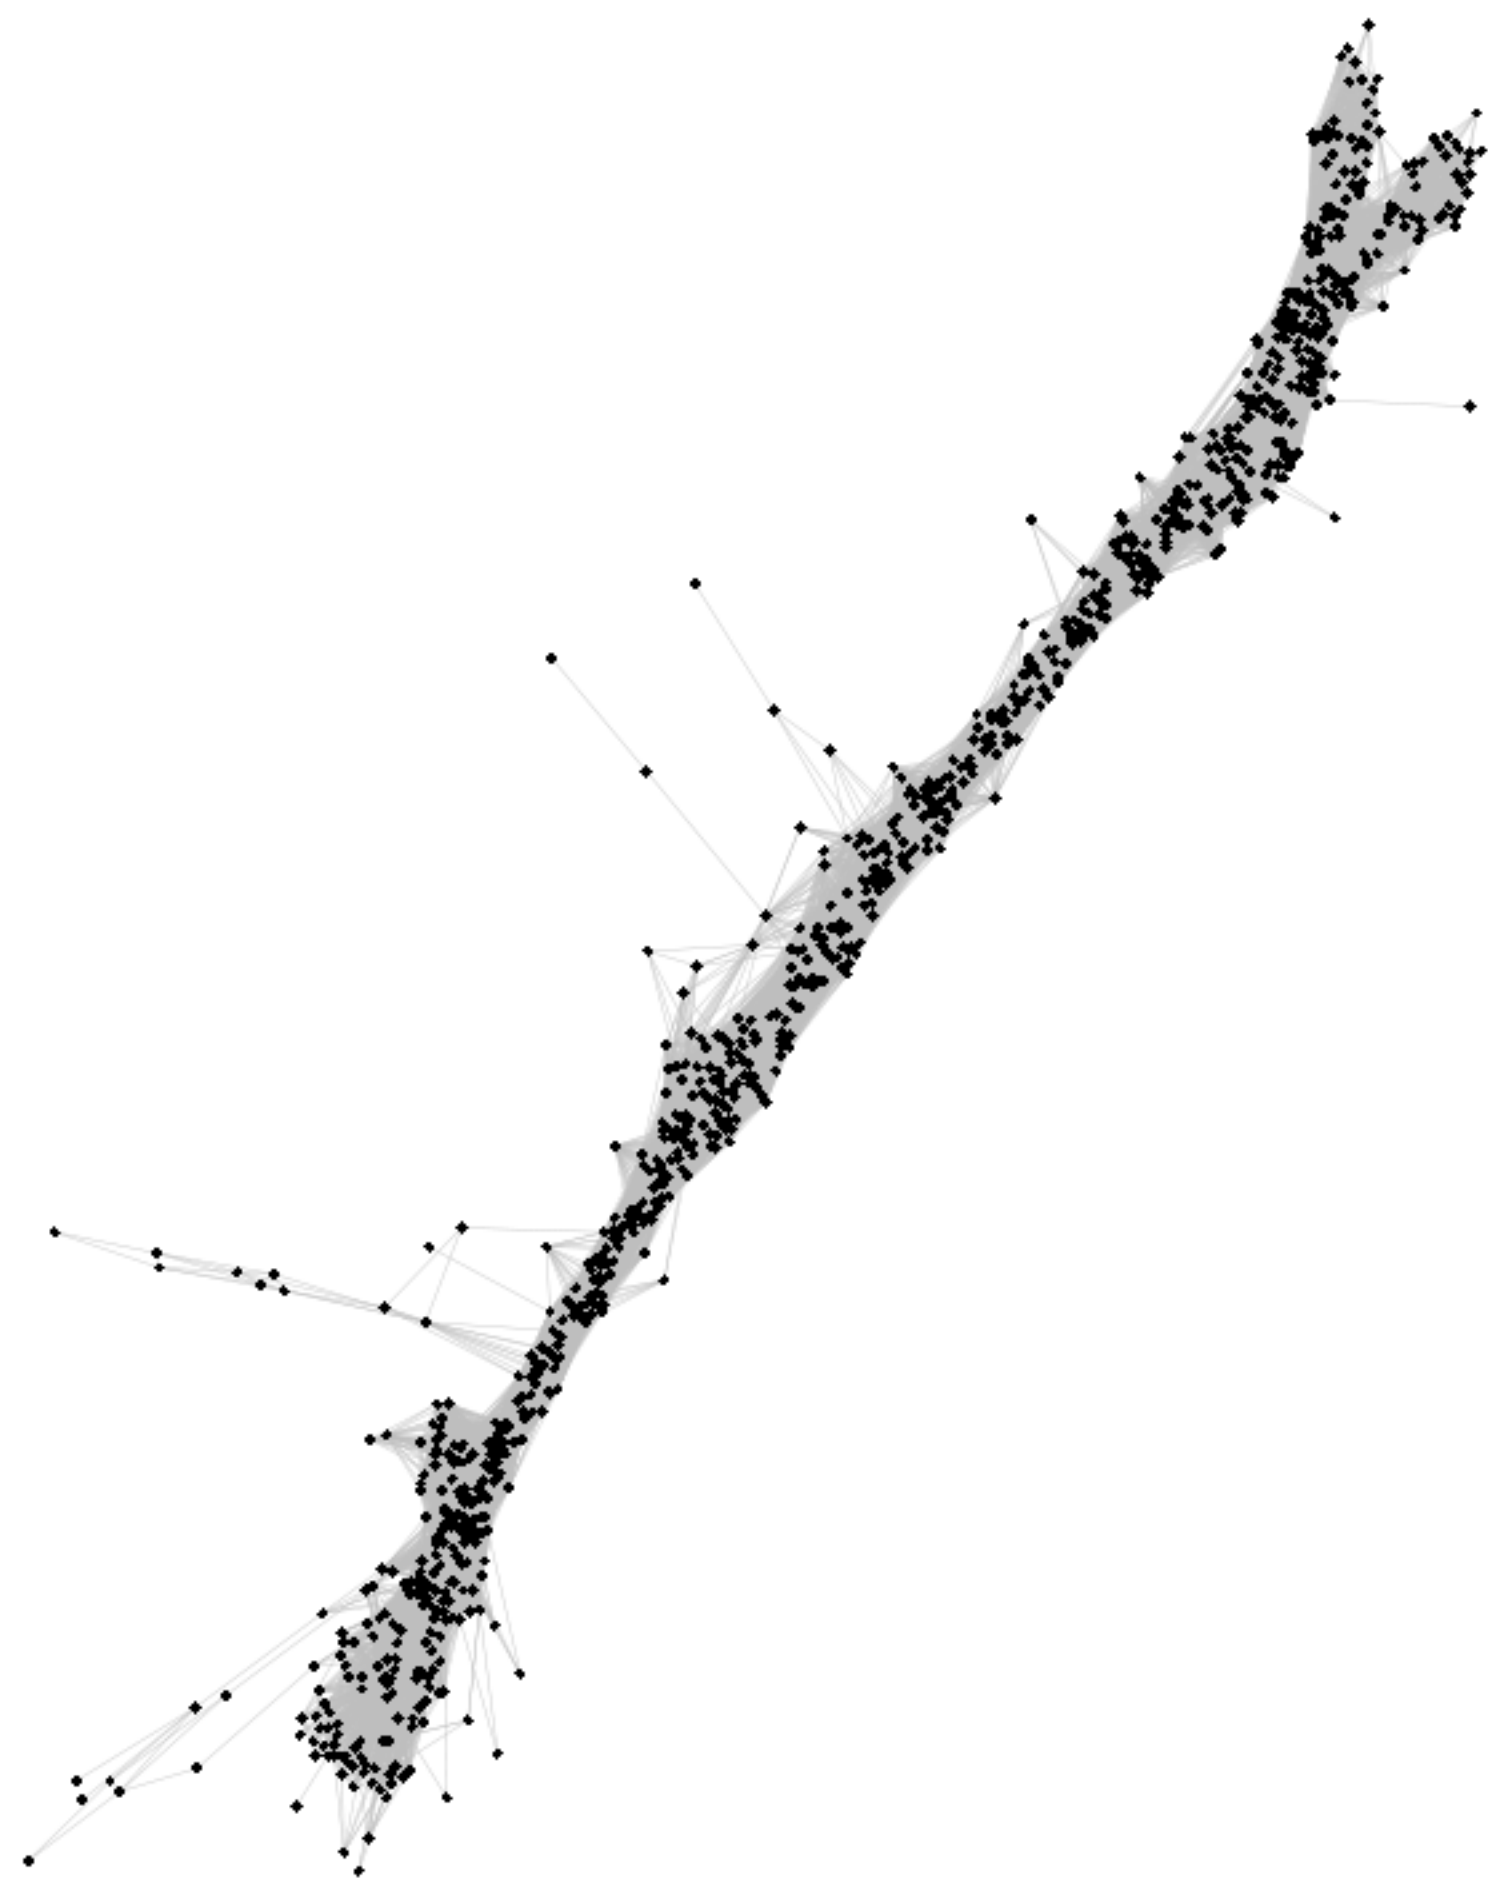

**CL134**

Number of reads: 995  
Number of pairs: 39049  
Density: 0.07896  
Diameter: NA  
Mean edge weight: 170.92  
Max. degree: 161

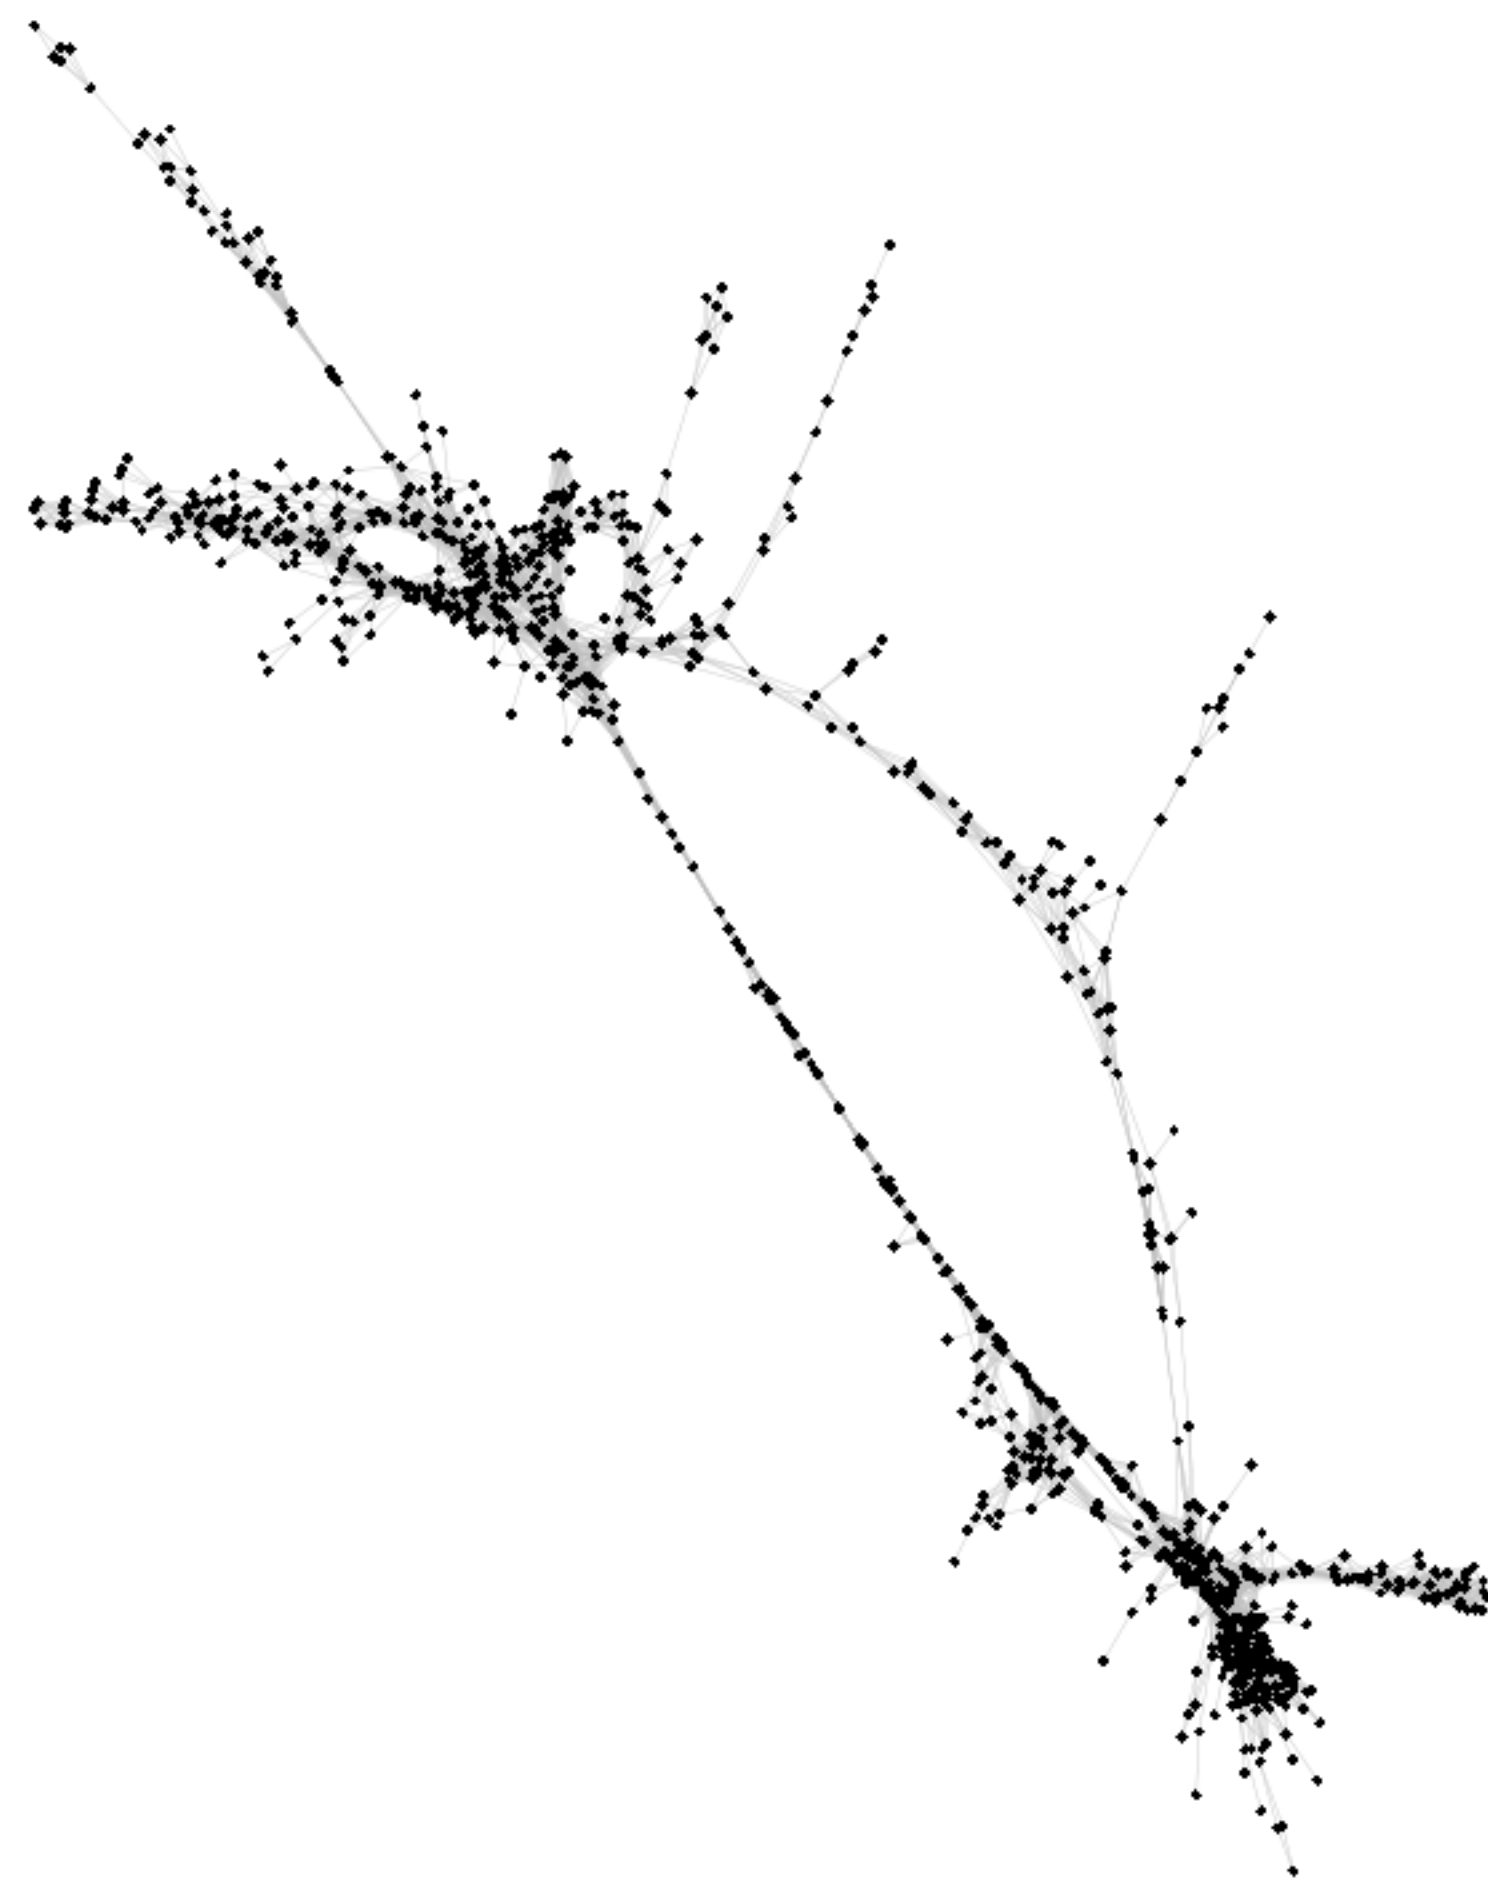

**CL135**

Number of reads: 980  
Number of pairs: 9942  
Density: 0.02073  
Diameter: NA  
Mean edge weight: 153.88  
Max. degree: 106

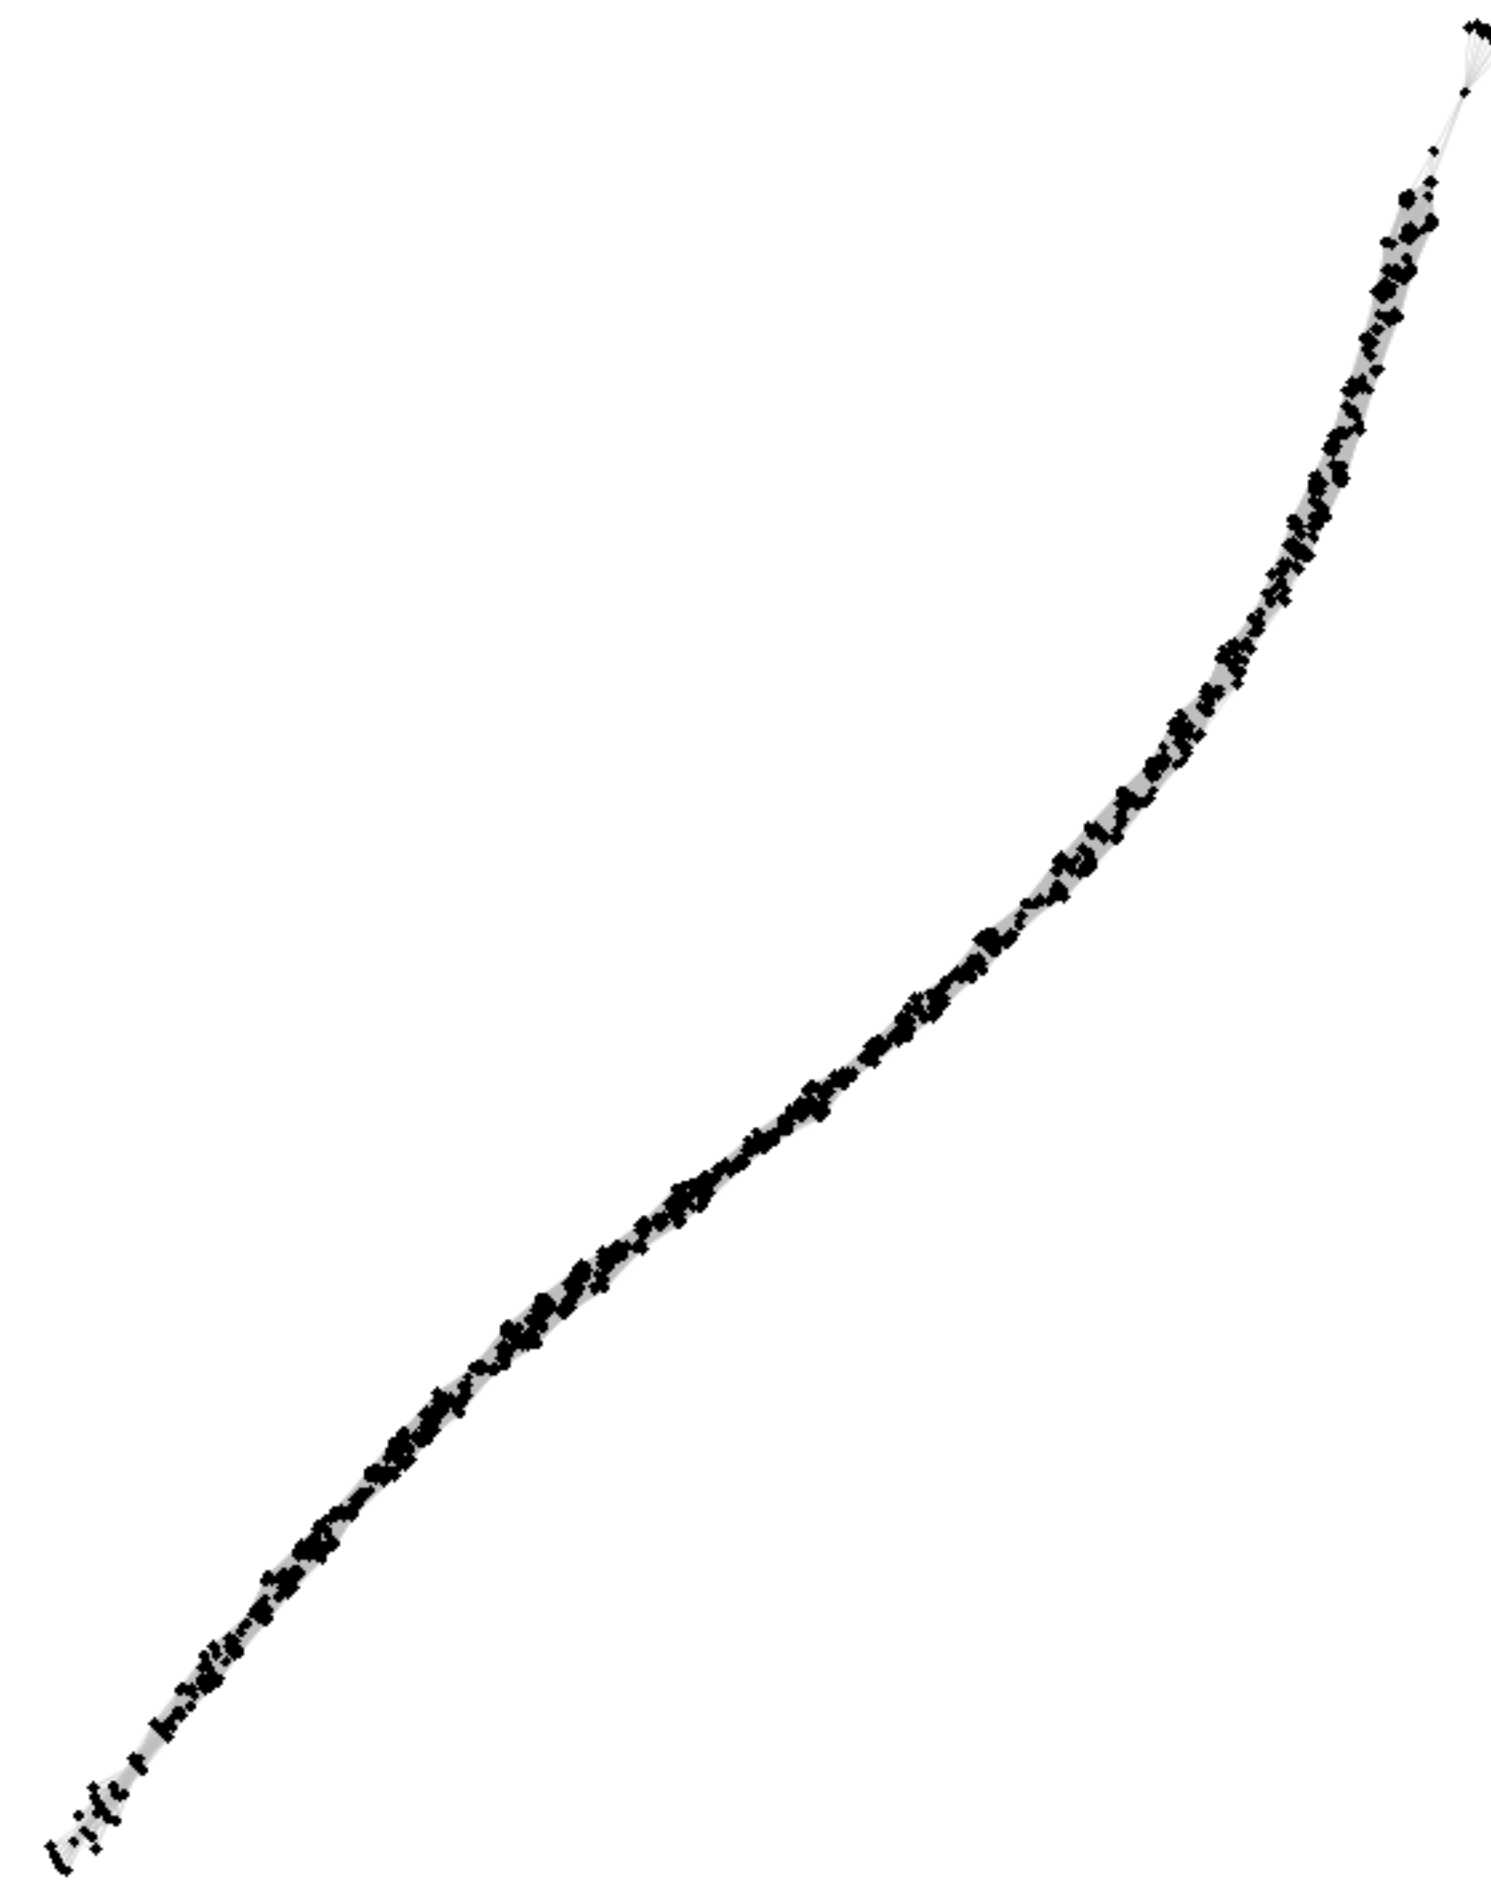

**CL136**

Number of reads: 974  
Number of pairs: 25659  
Density: 0.05415  
Diameter: NA  
Mean edge weight: 214.94  
Max. degree: 79

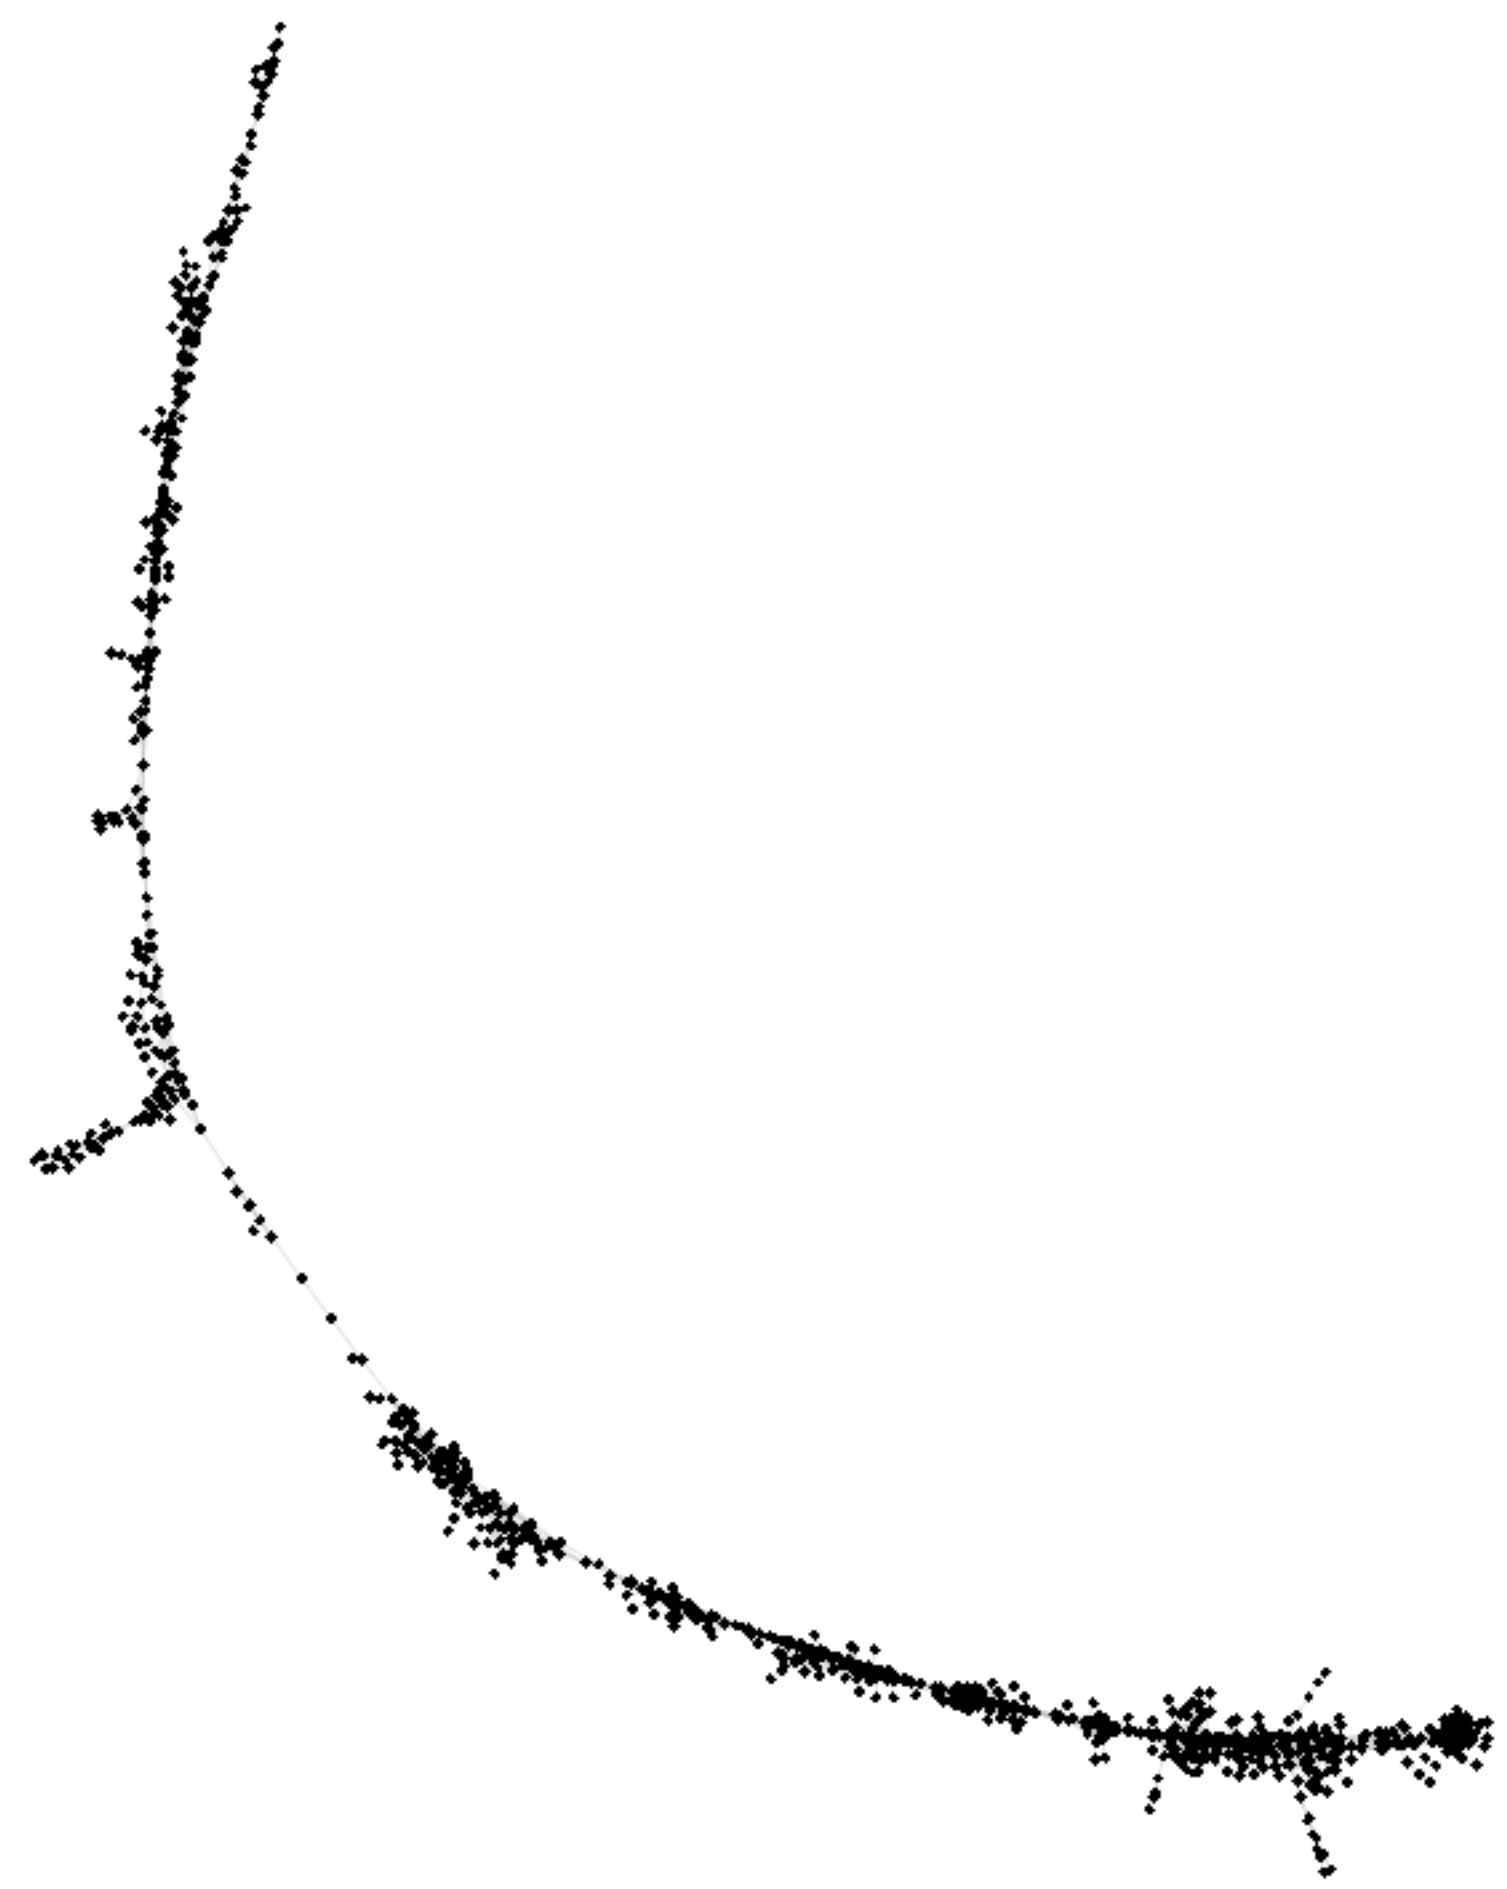

**CL137**

Number of reads: 959  
Number of pairs: 4163  
Density: 0.009063  
Diameter: NA  
Mean edge weight: 148.25  
Max. degree: 35

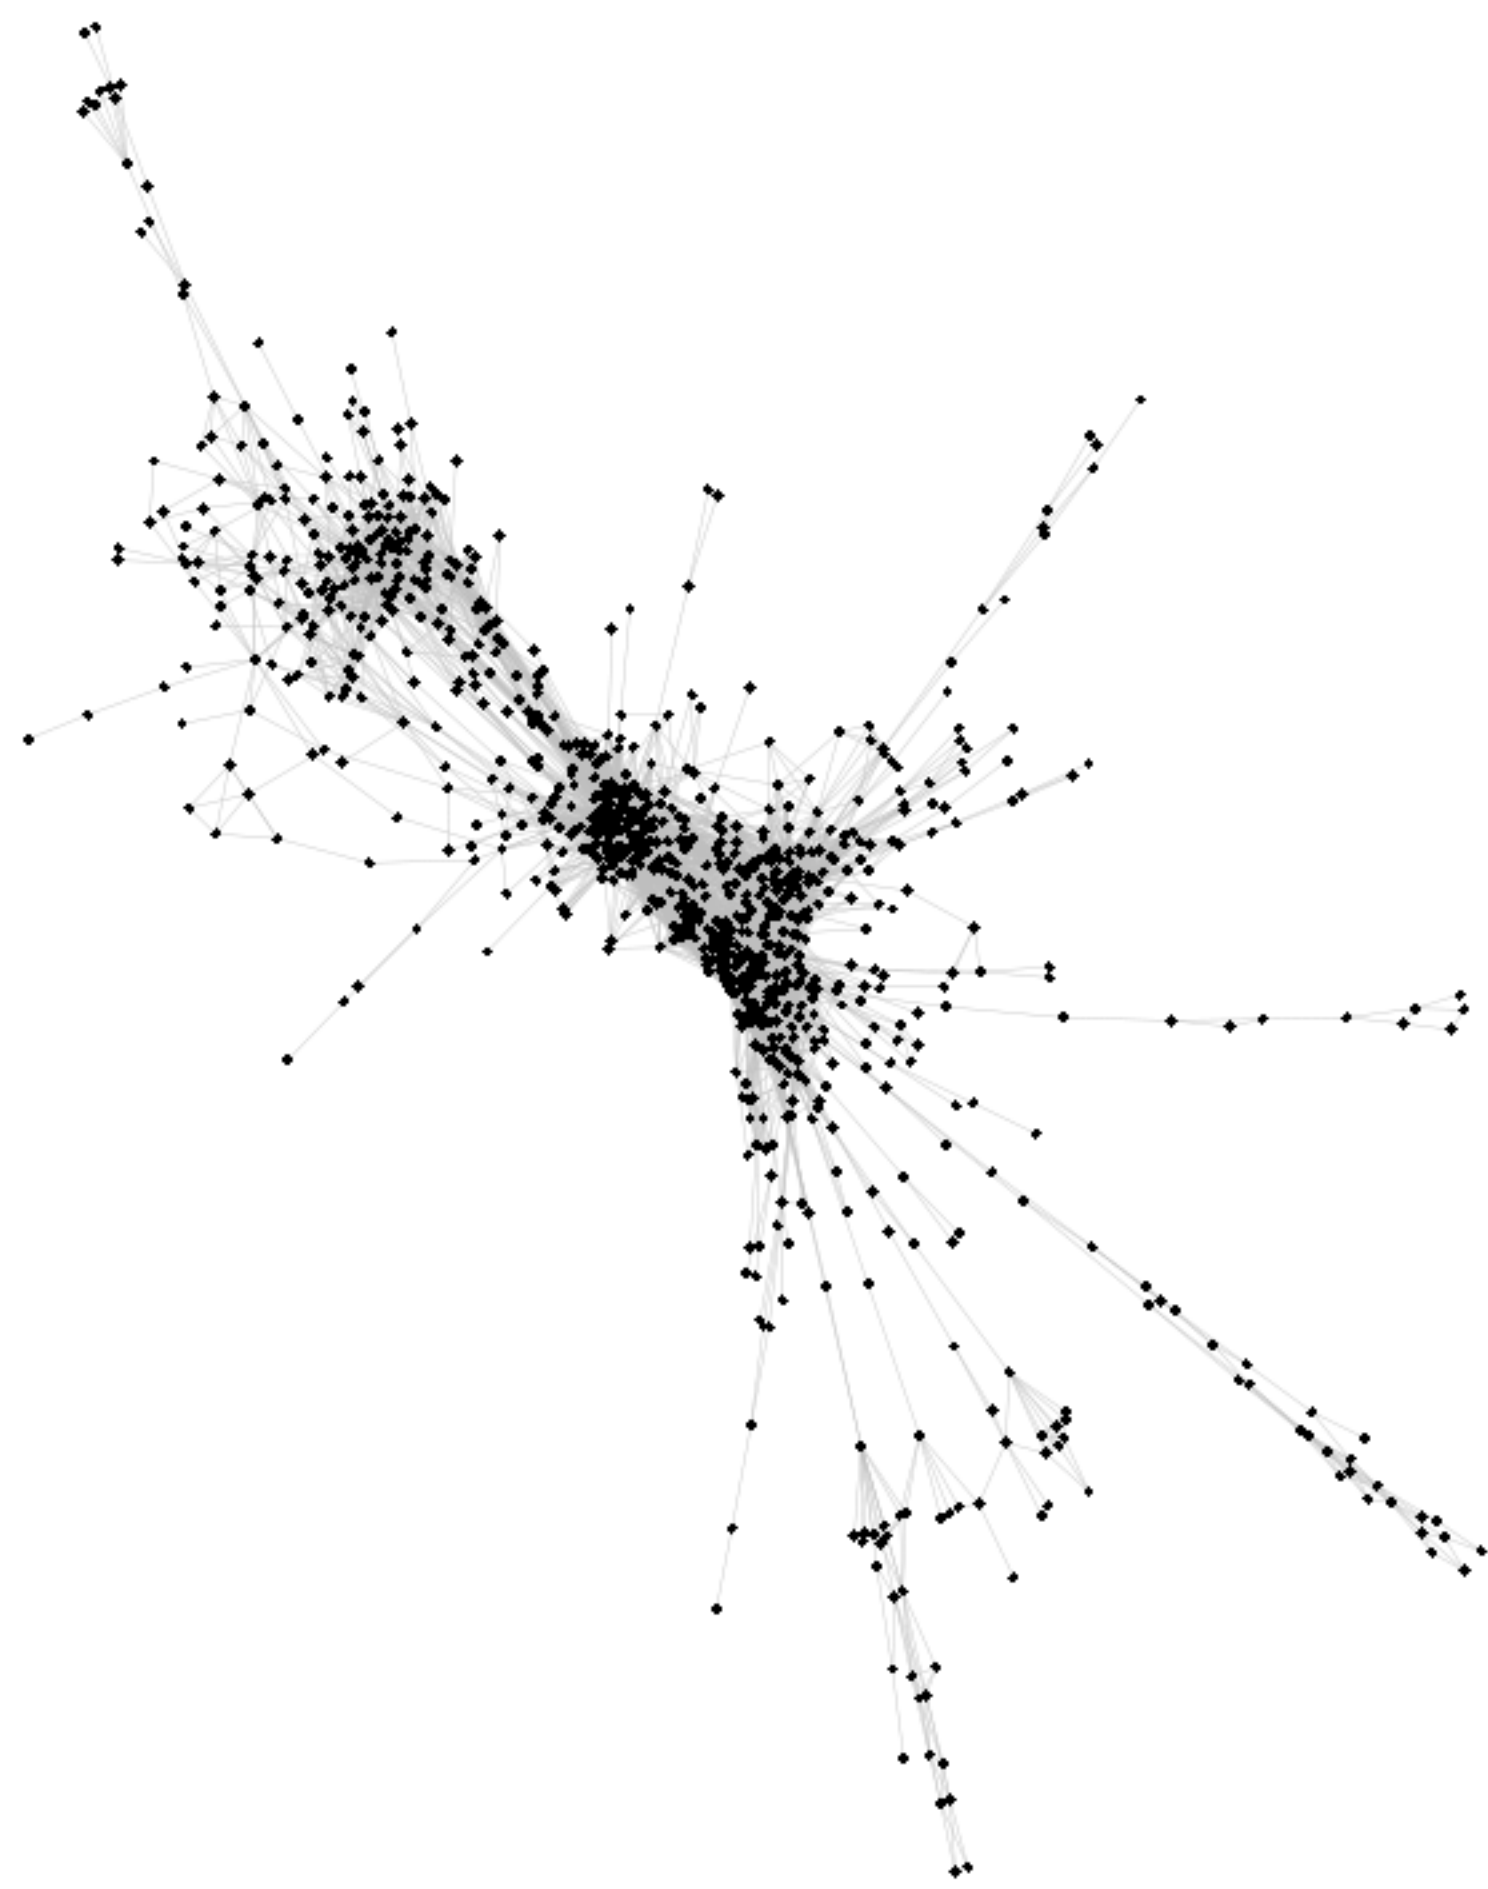

**CL138**

Number of reads: 944  
Number of pairs: 12900  
Density: 0.02898  
Diameter: NA  
Mean edge weight: 145.78  
Max. degree: 141

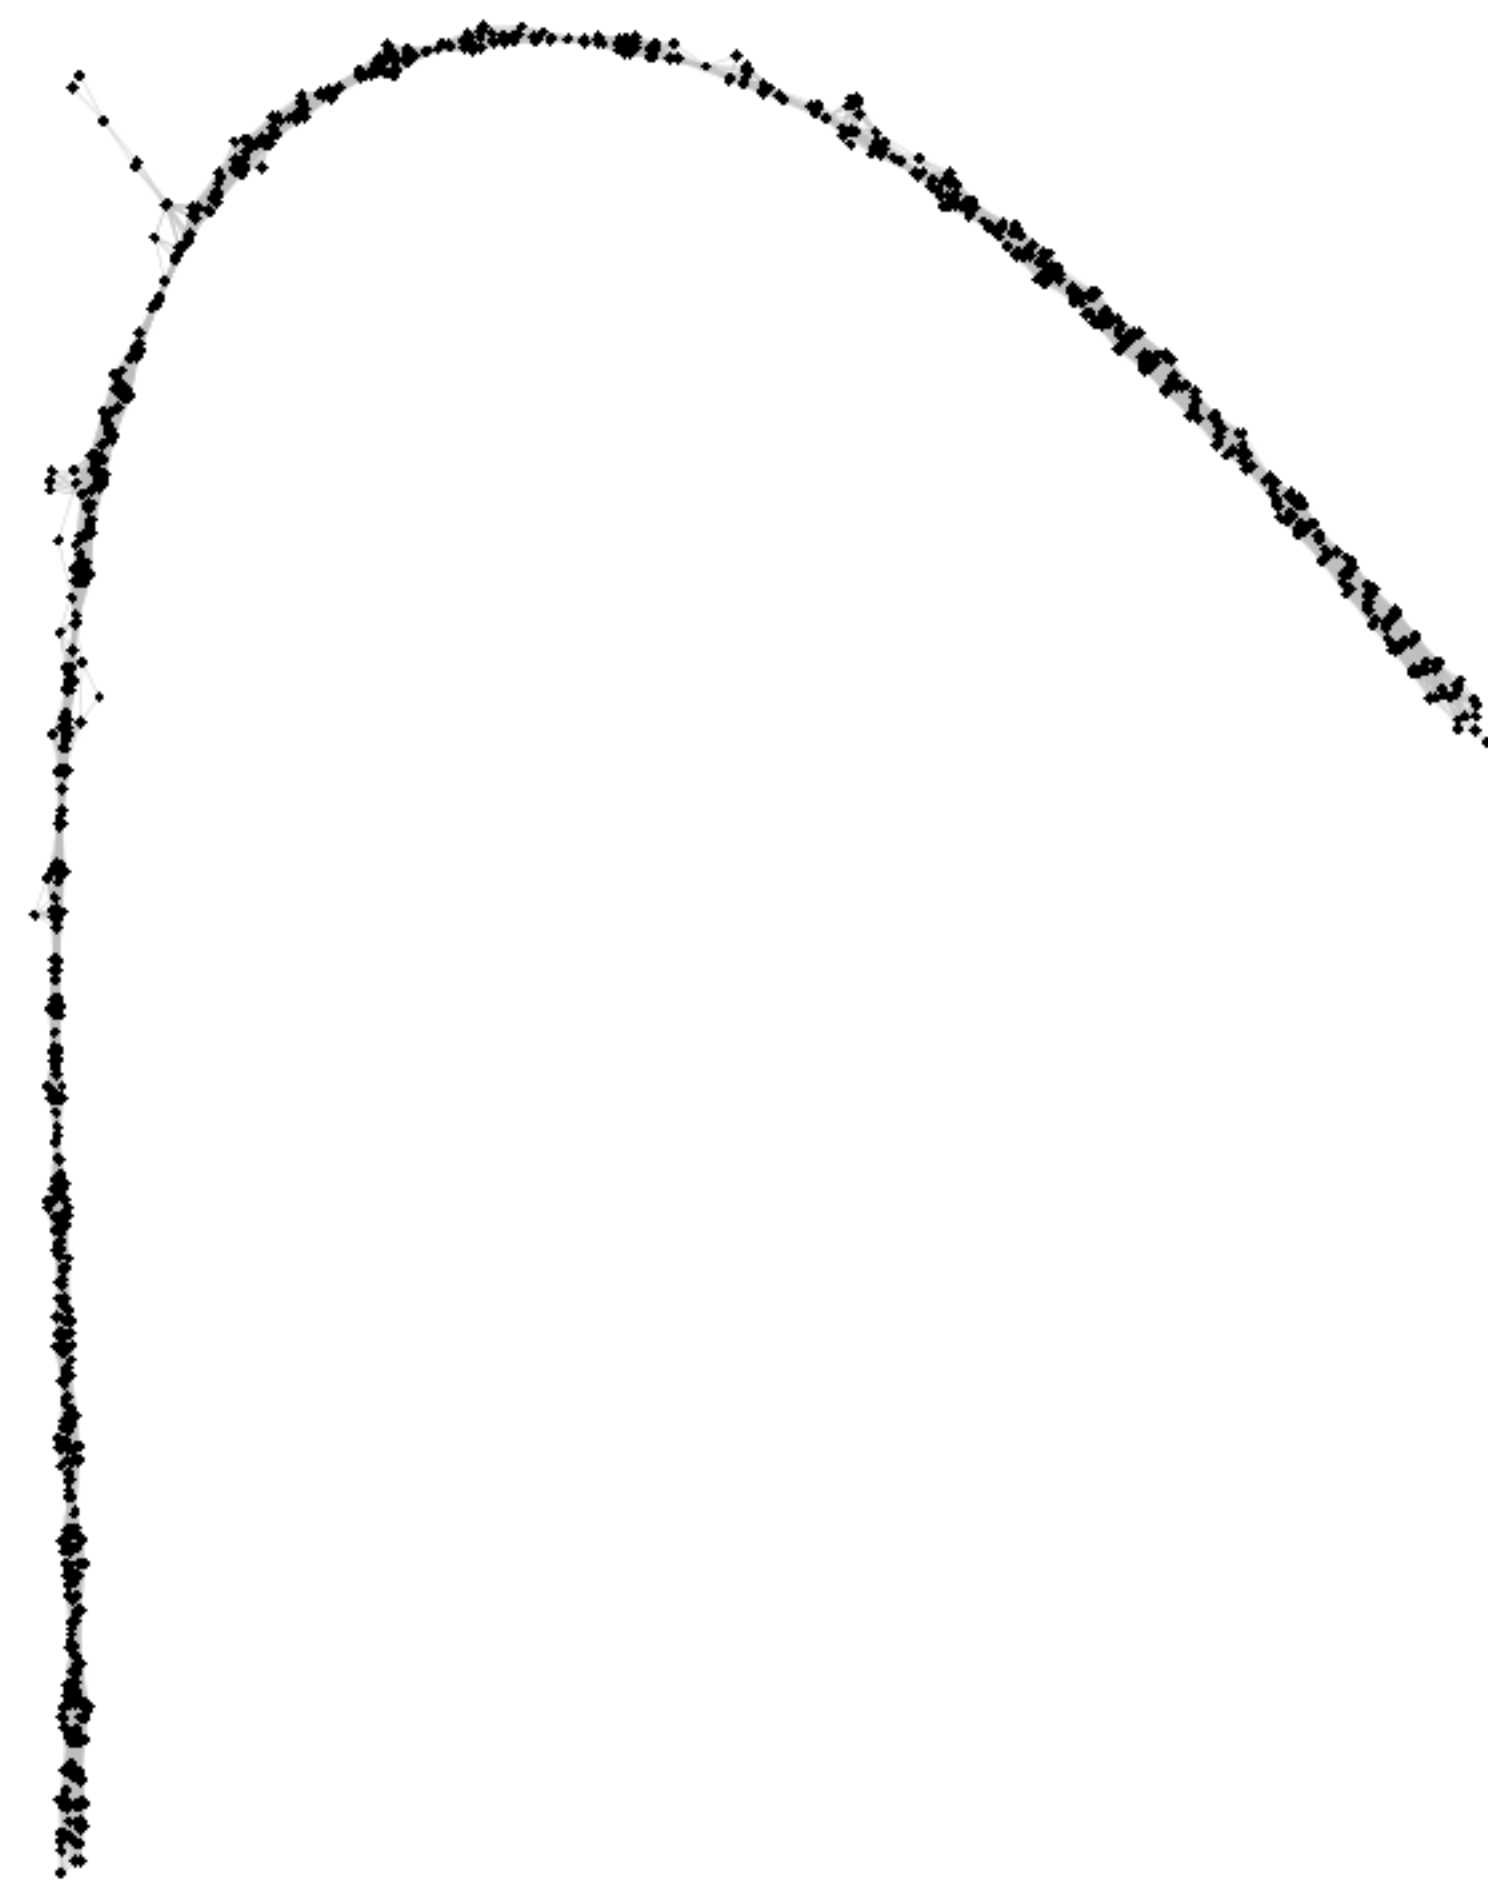

**CL139**

Number of reads: 936  
Number of pairs: 13634  
Density: 0.03116  
Diameter: NA  
Mean edge weight: 215.08  
Max. degree: 49

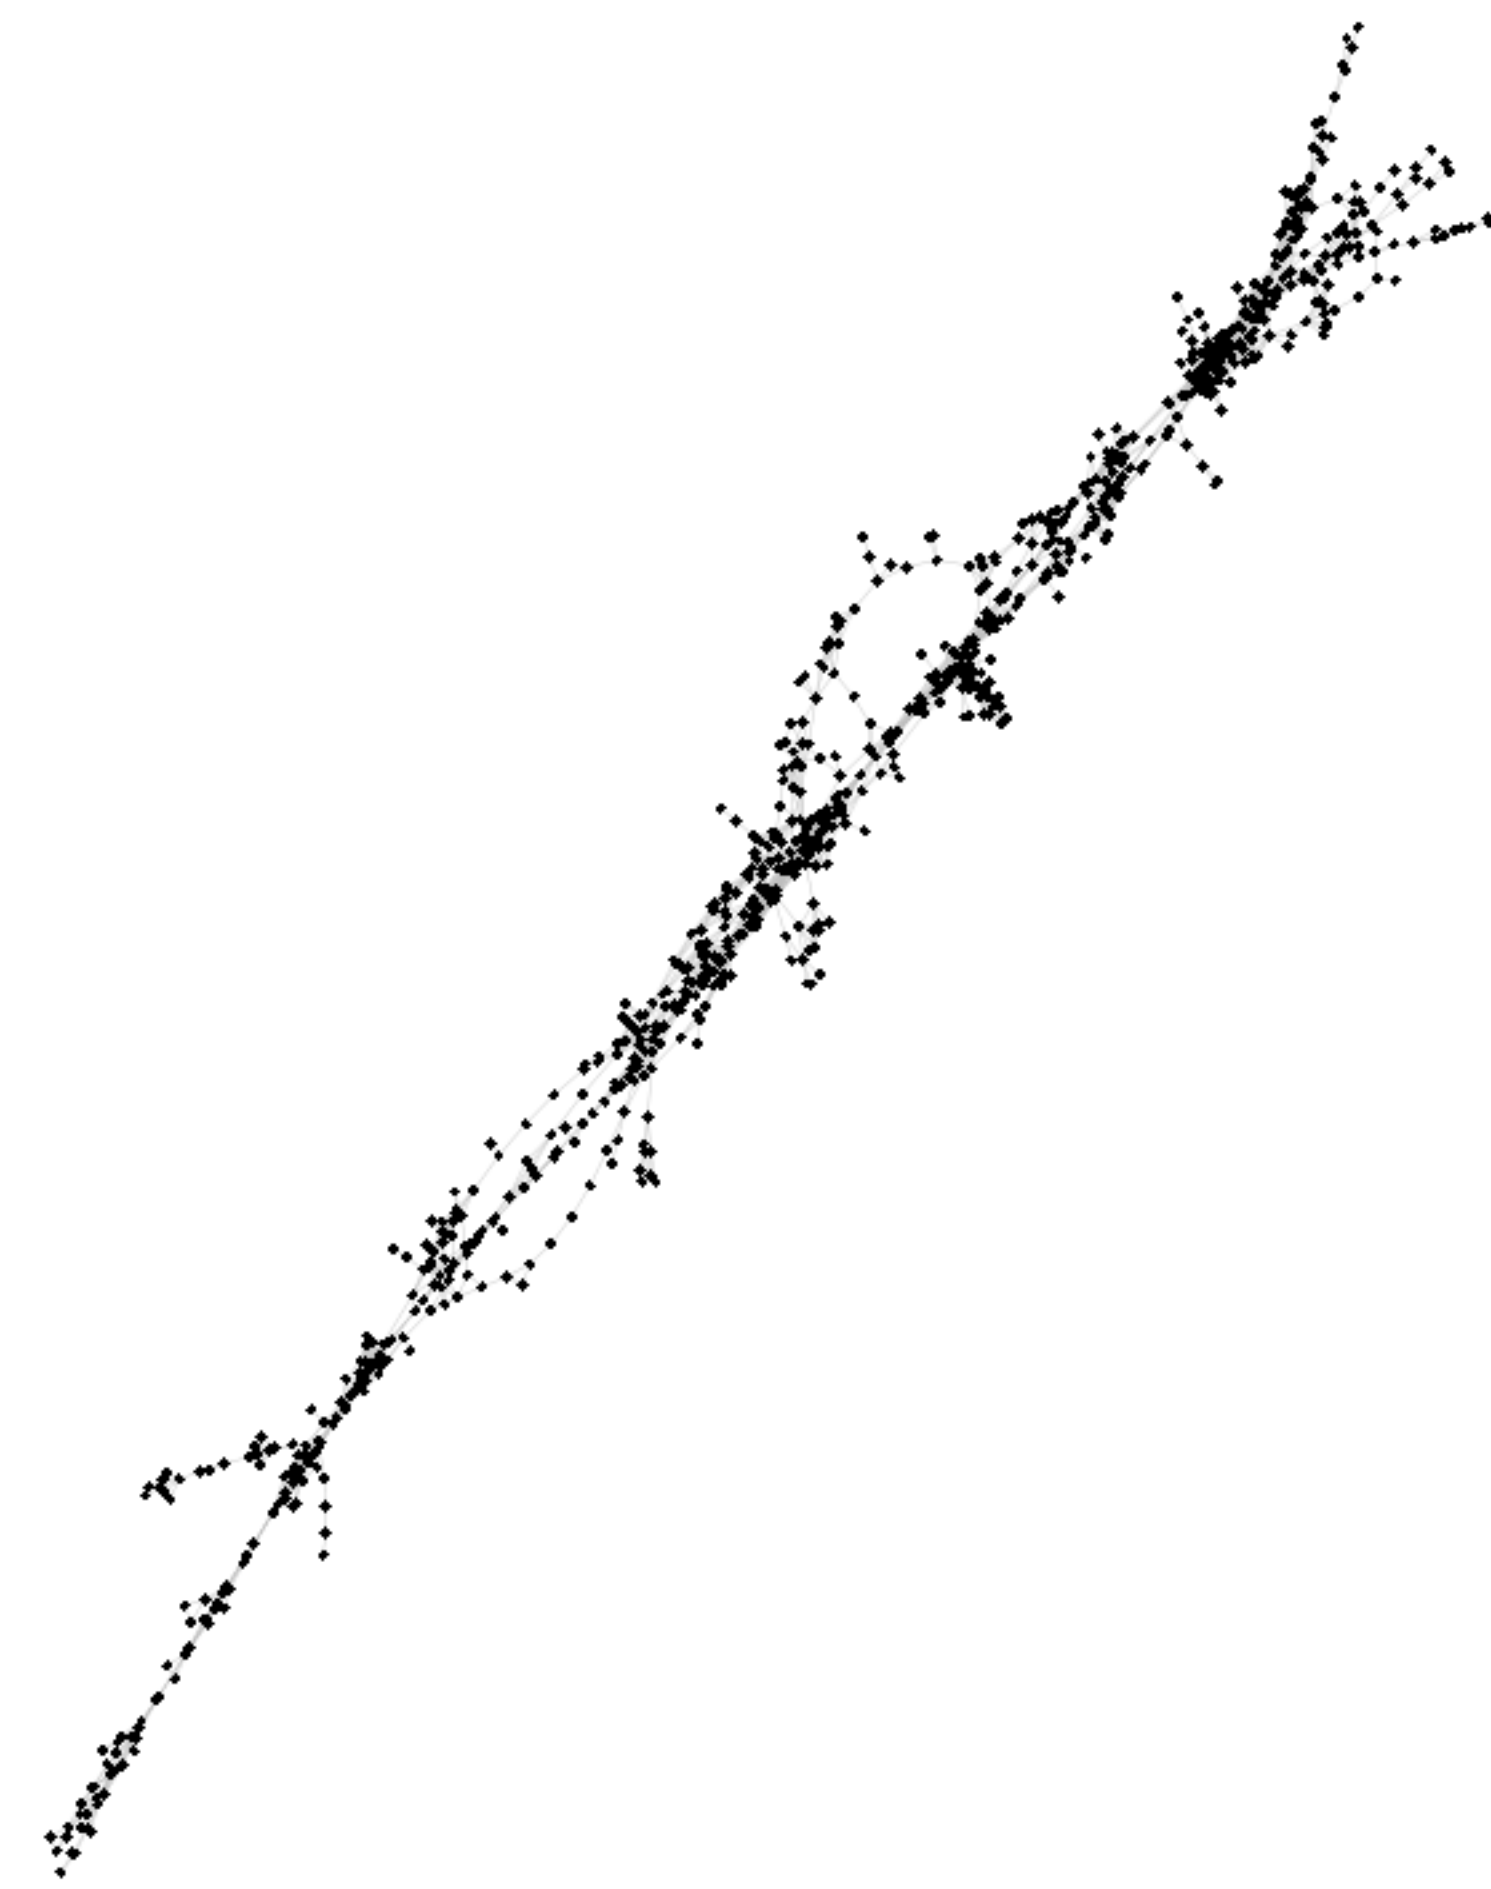

**CL140**

Number of reads: 836  
Number of pairs: 3719  
Density: 0.01066  
Diameter: NA  
Mean edge weight: 160.05  
Max. degree: 44

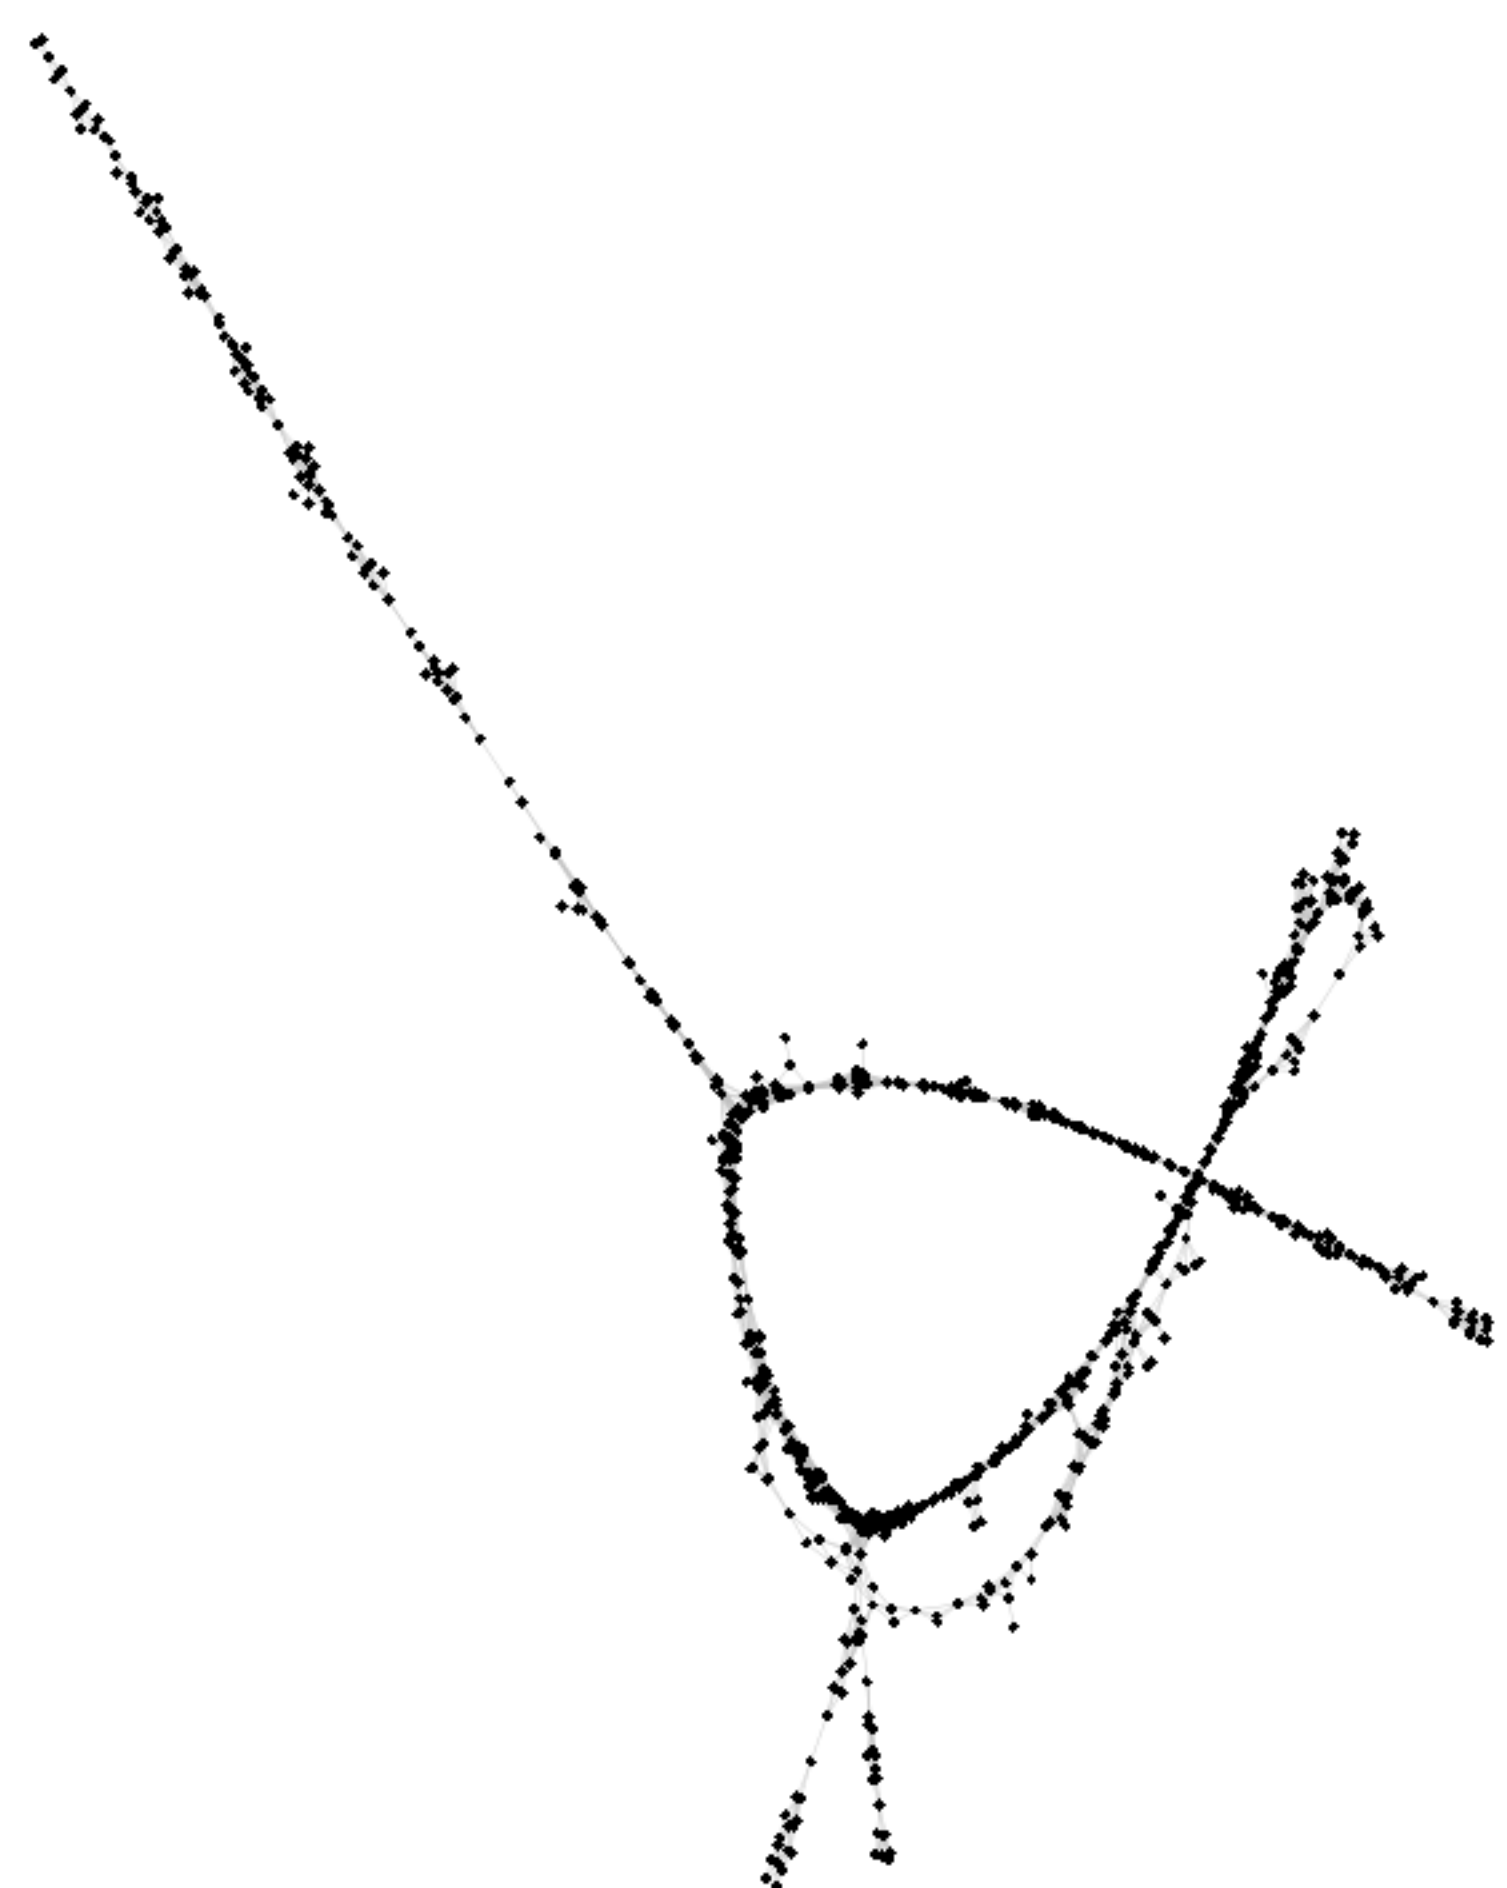

**CL141**

Number of reads: 835  
Number of pairs: 5693  
Density: 0.01635  
Diameter: NA  
Mean edge weight: 177.21  
Max. degree: 33

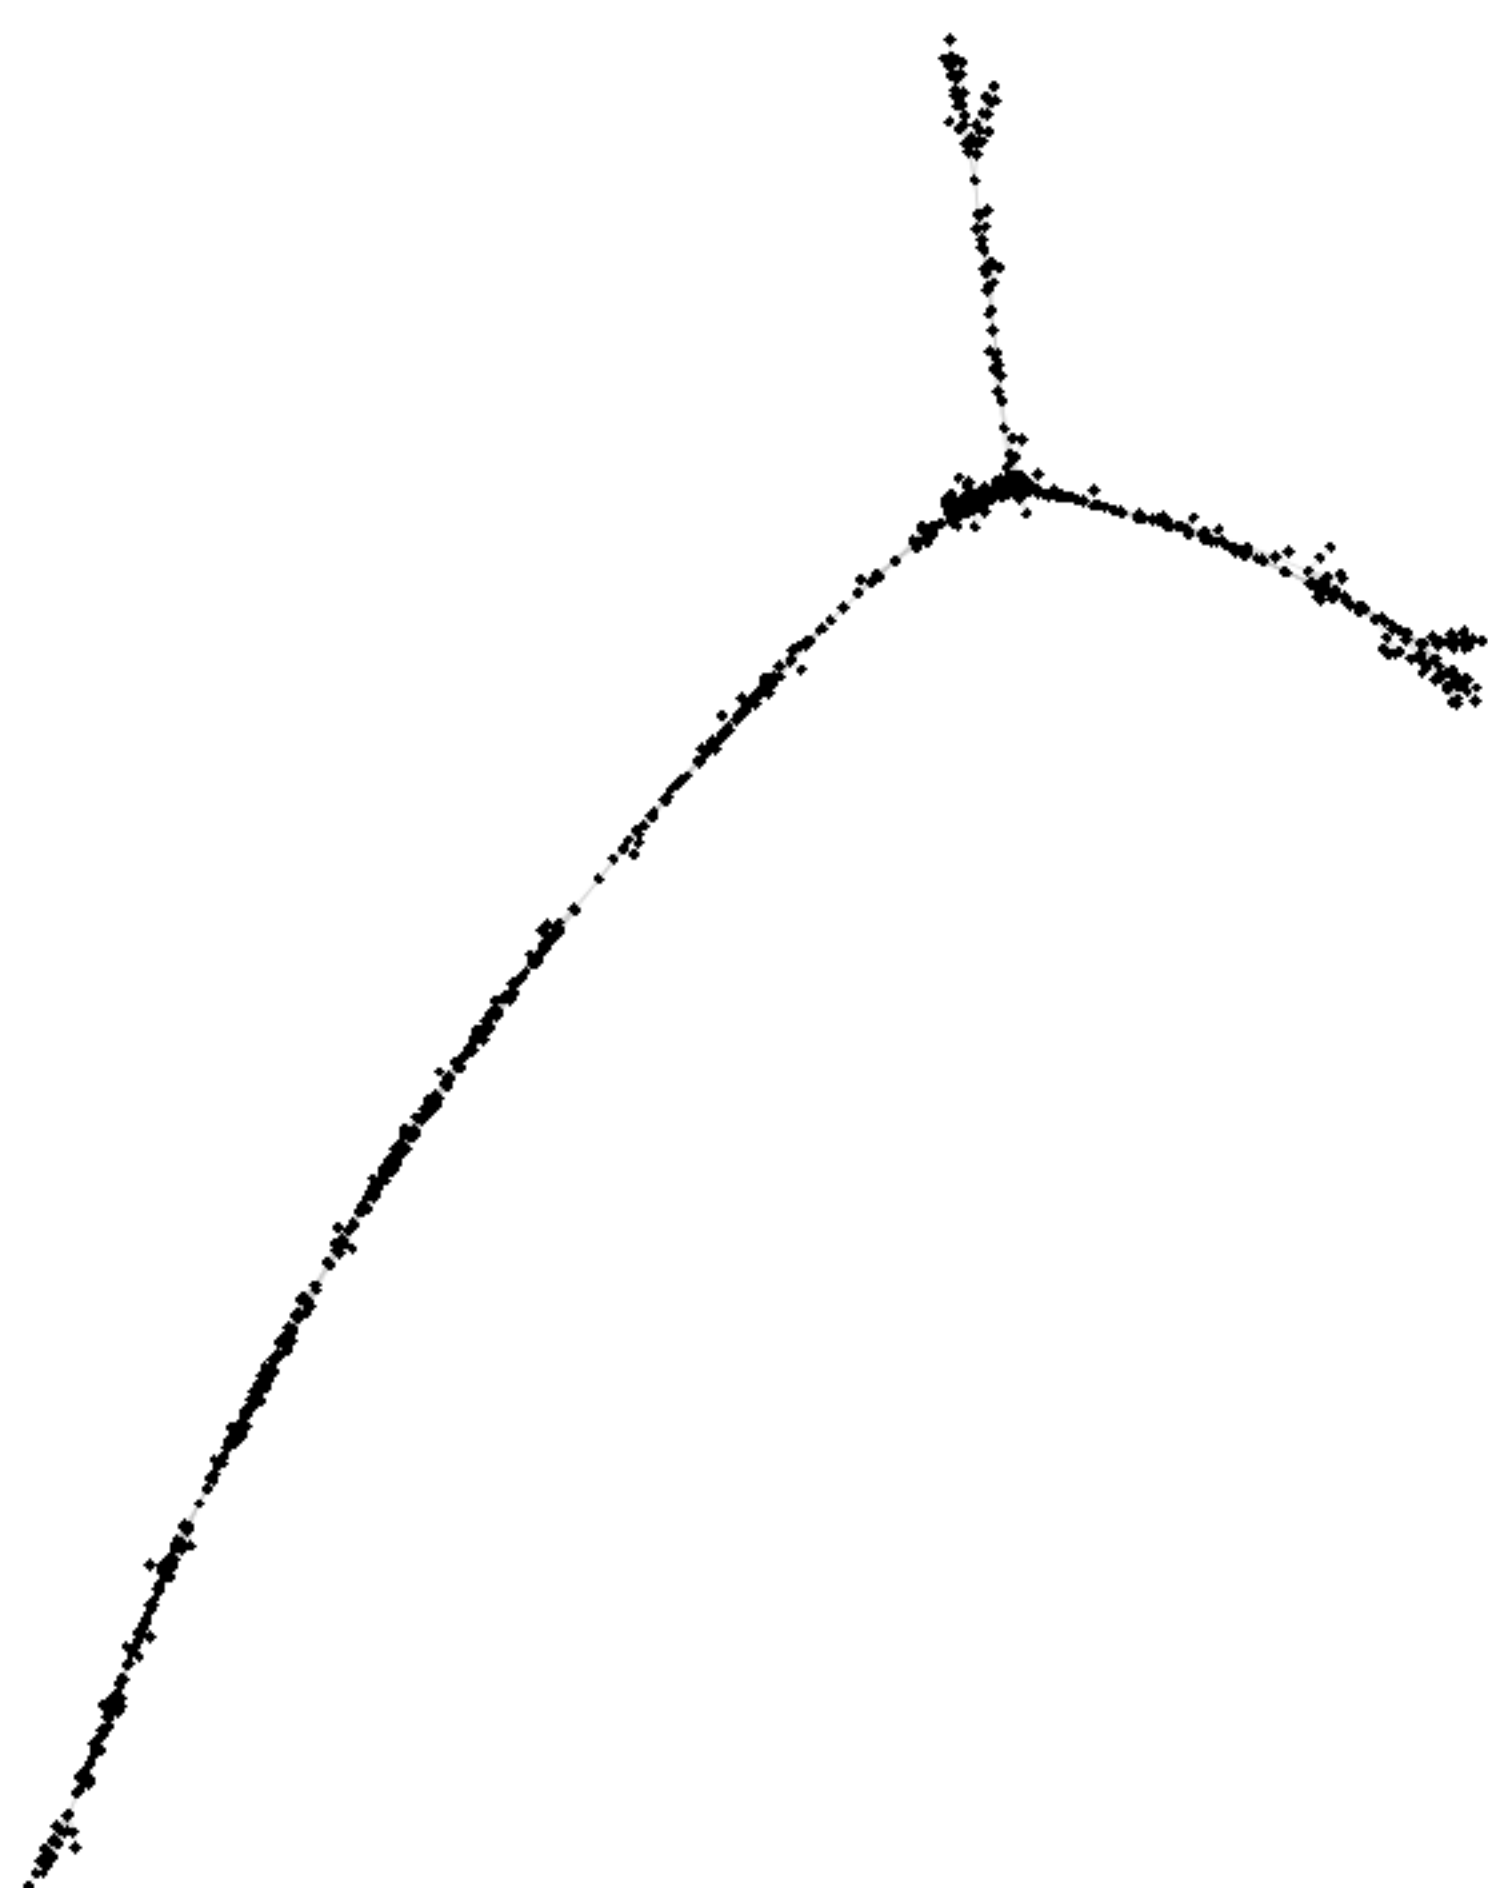

**CL142**

Number of reads: 794  
Number of pairs: 5429  
Density: 0.01724  
Diameter: NA  
Mean edge weight: 169.42  
Max. degree: 49

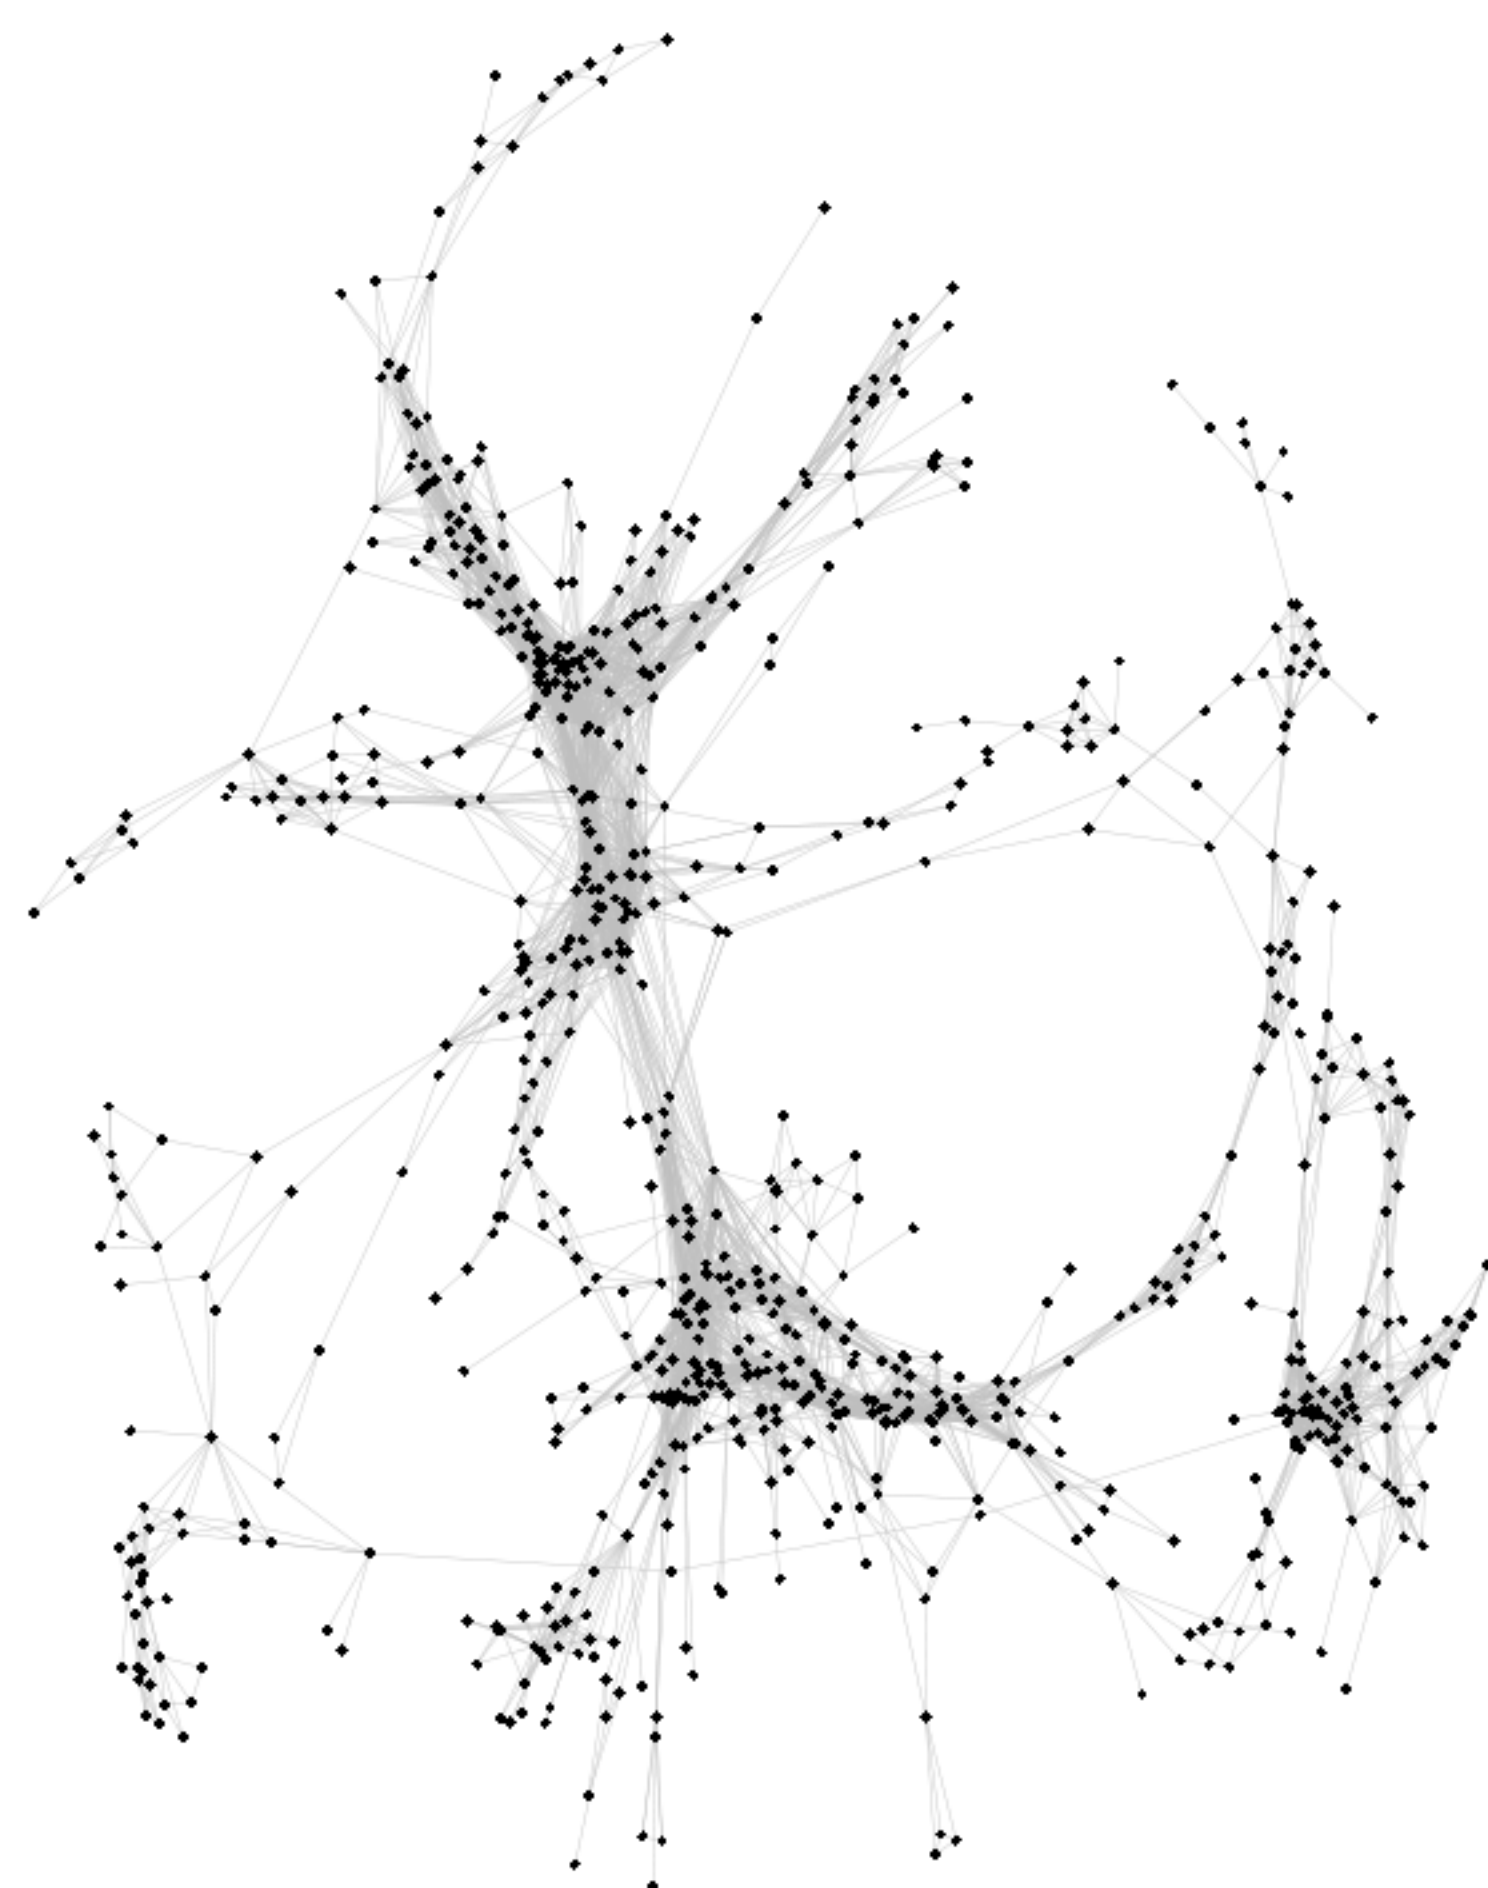

**CL143**

Number of reads: 782  
Number of pairs: 5419  
Density: 0.01775  
Diameter: NA  
Mean edge weight: 163.29  
Max. degree: 68

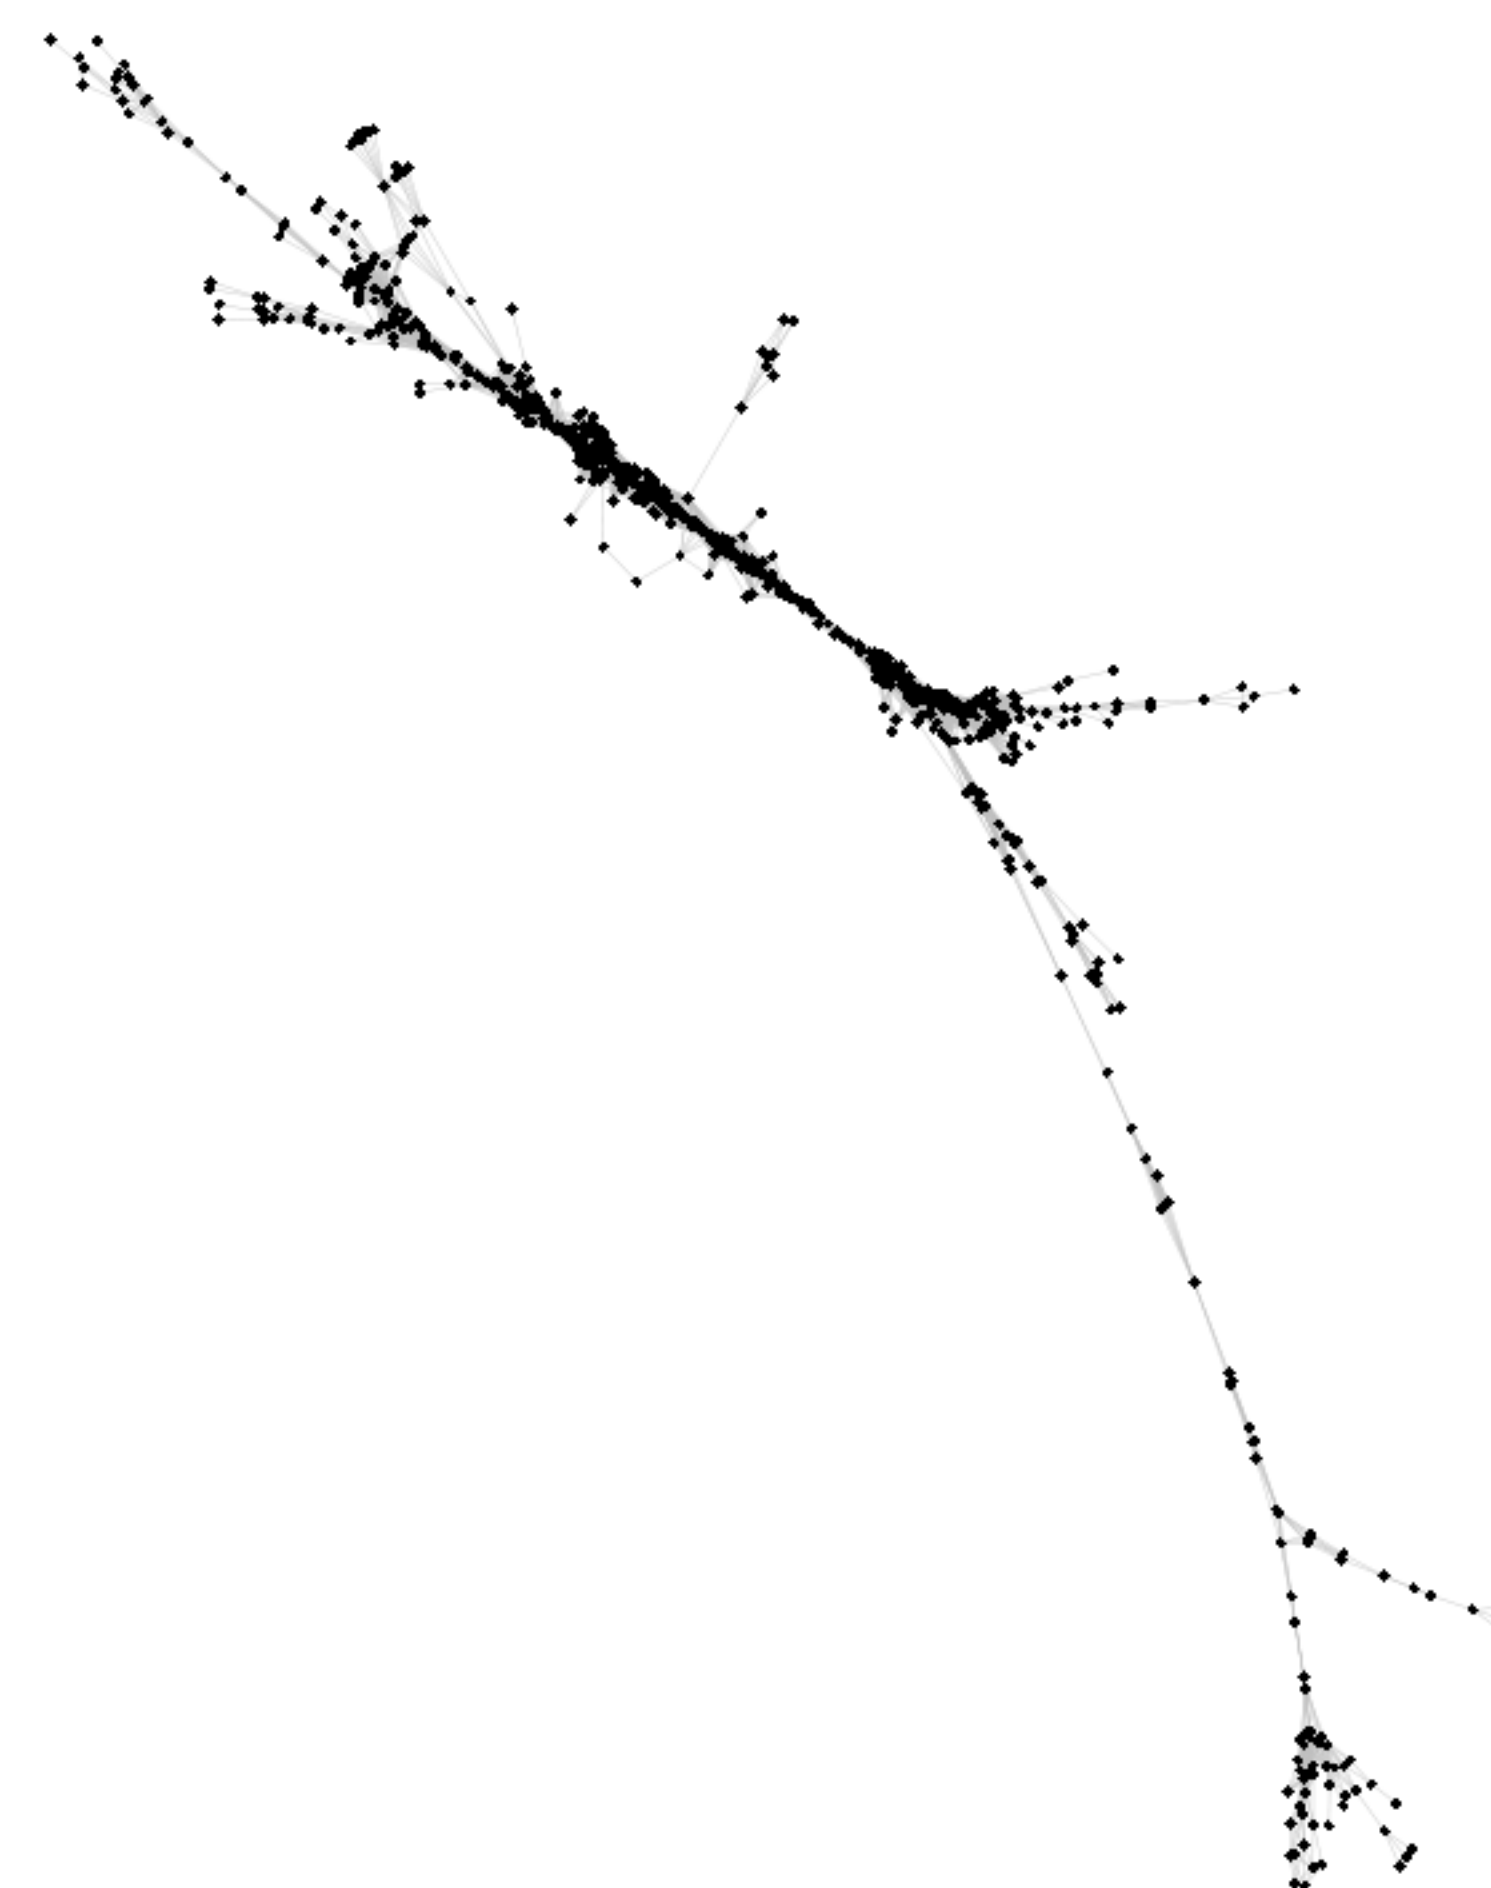

**CL144**

Number of reads: 751  
Number of pairs: 15537  
Density: 0.05517  
Diameter: NA  
Mean edge weight: 174.83  
Max. degree: 119

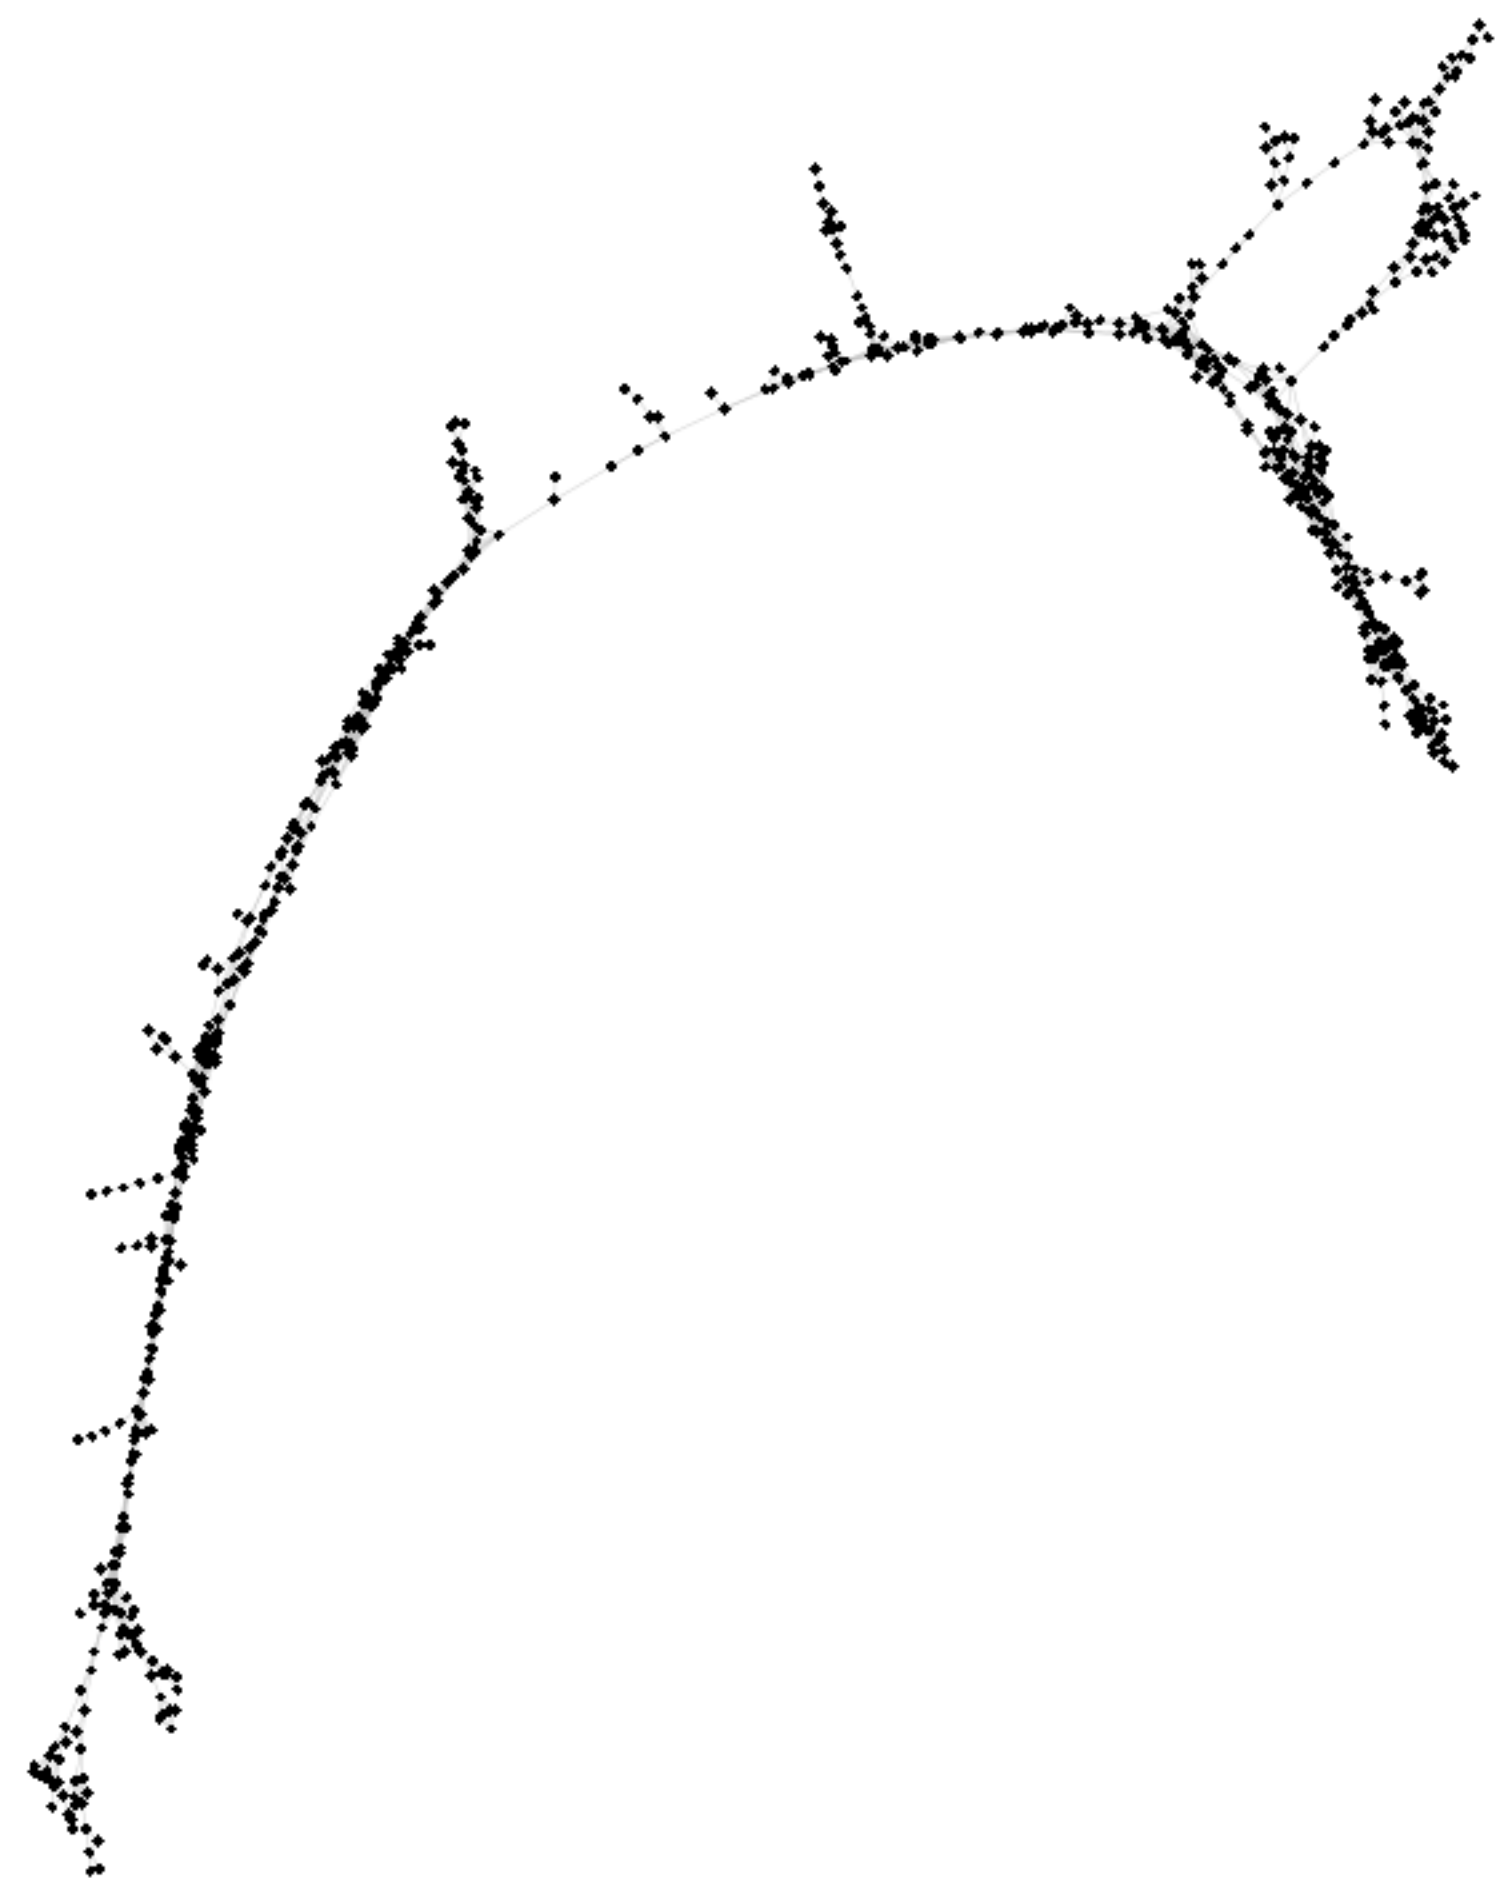

**CL145**

Number of reads: 734  
Number of pairs: 2932  
Density: 0.0109  
Diameter: NA  
Mean edge weigth: 162.29  
Max. degree: 22

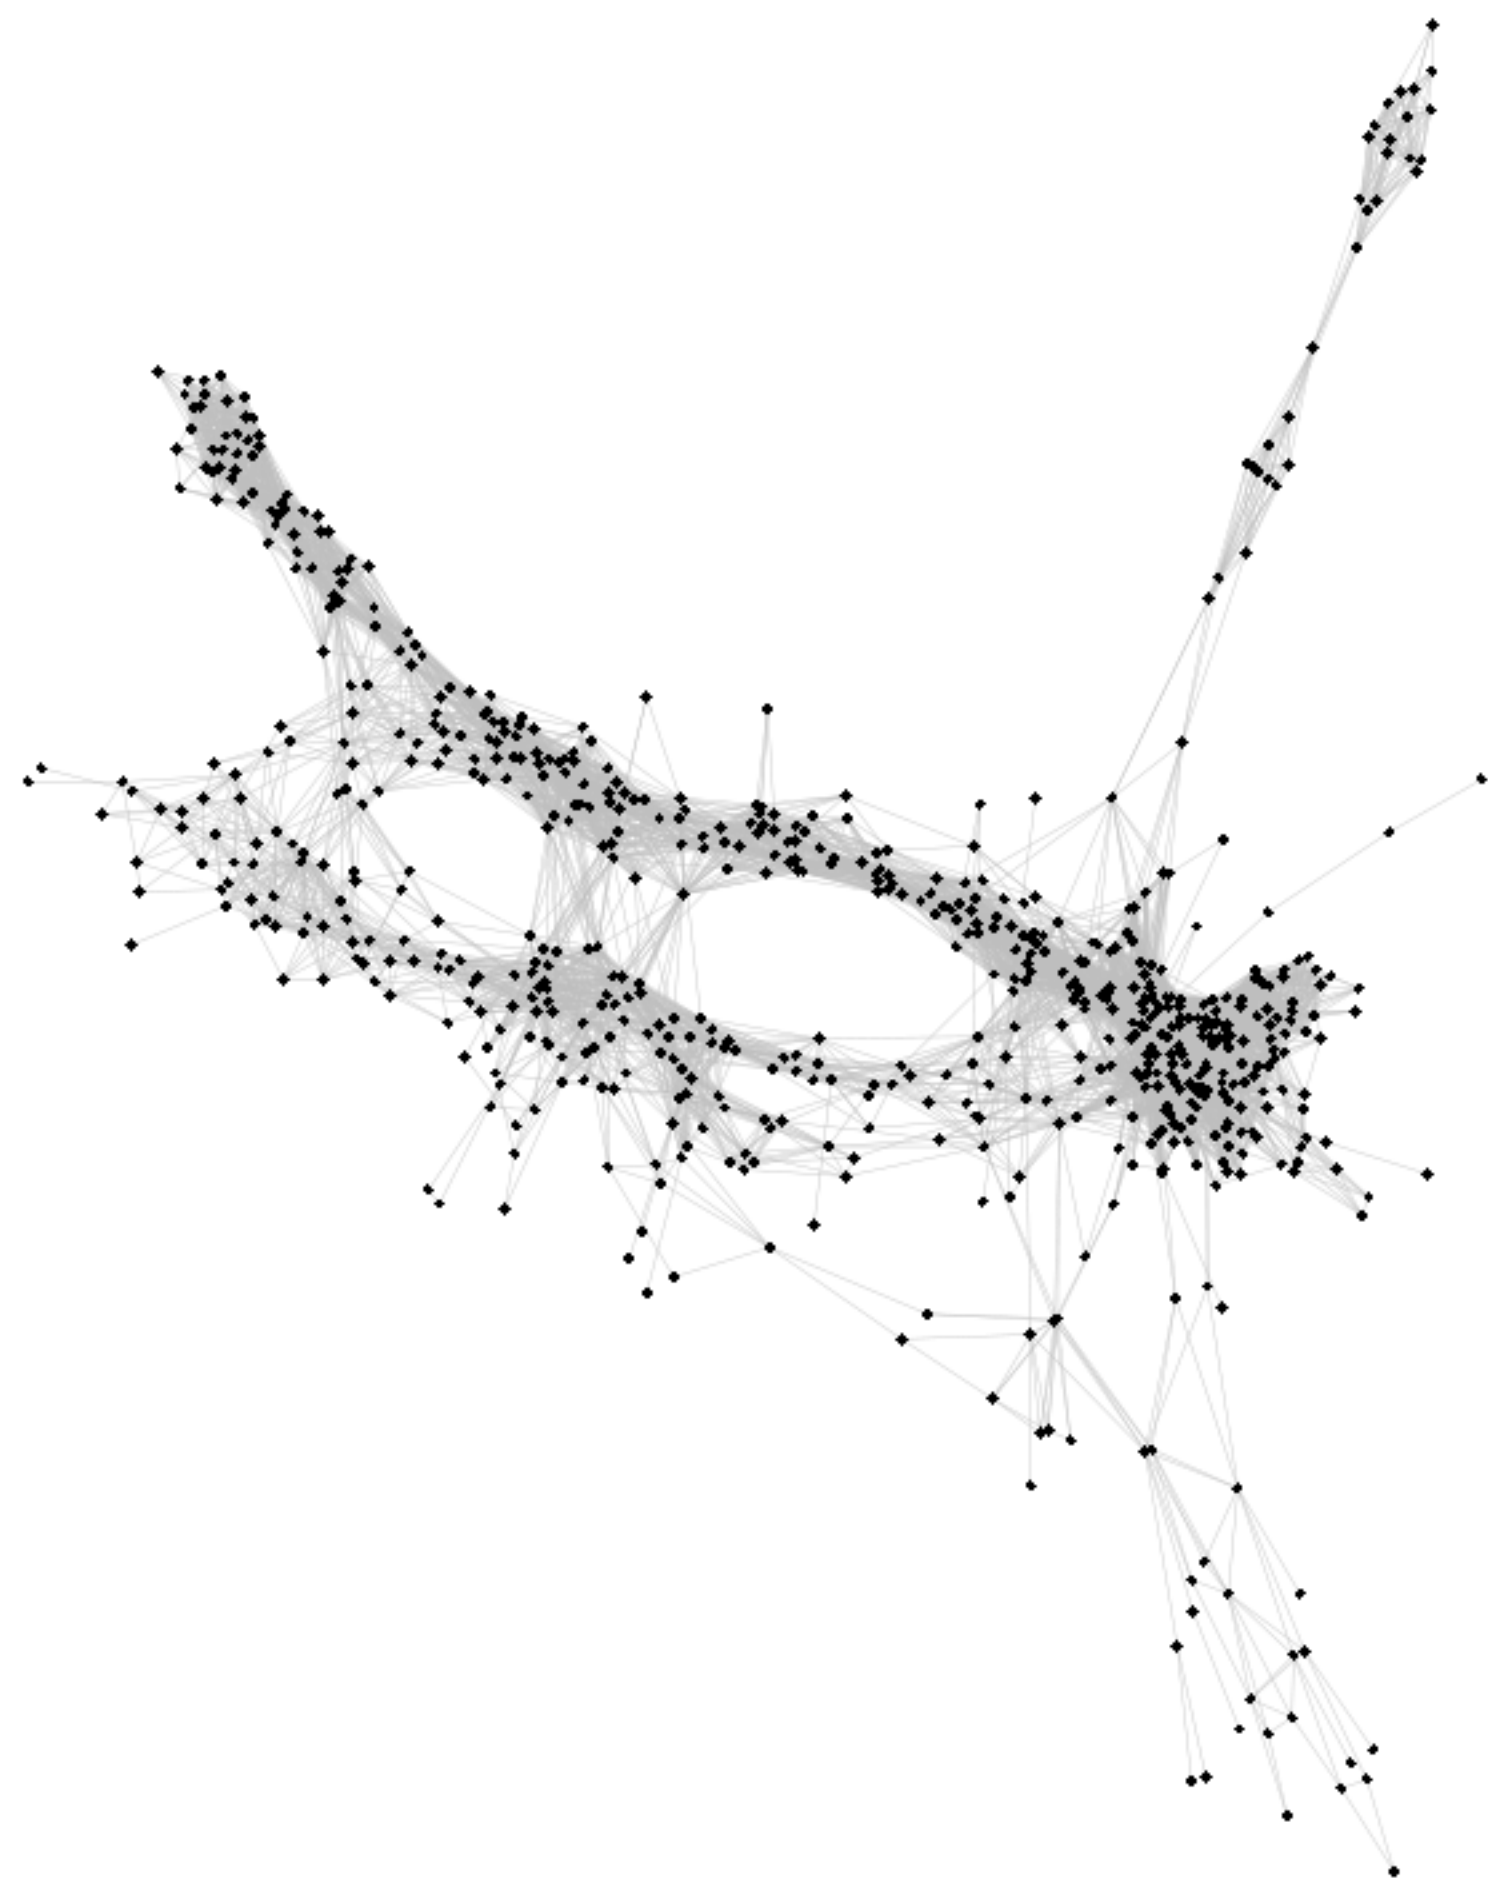

**CL146**

Number of reads: 691  
Number of pairs: 9294  
Density: 0.03899  
Diameter: NA  
Mean edge weigth: 153.28  
Max. degree: 110

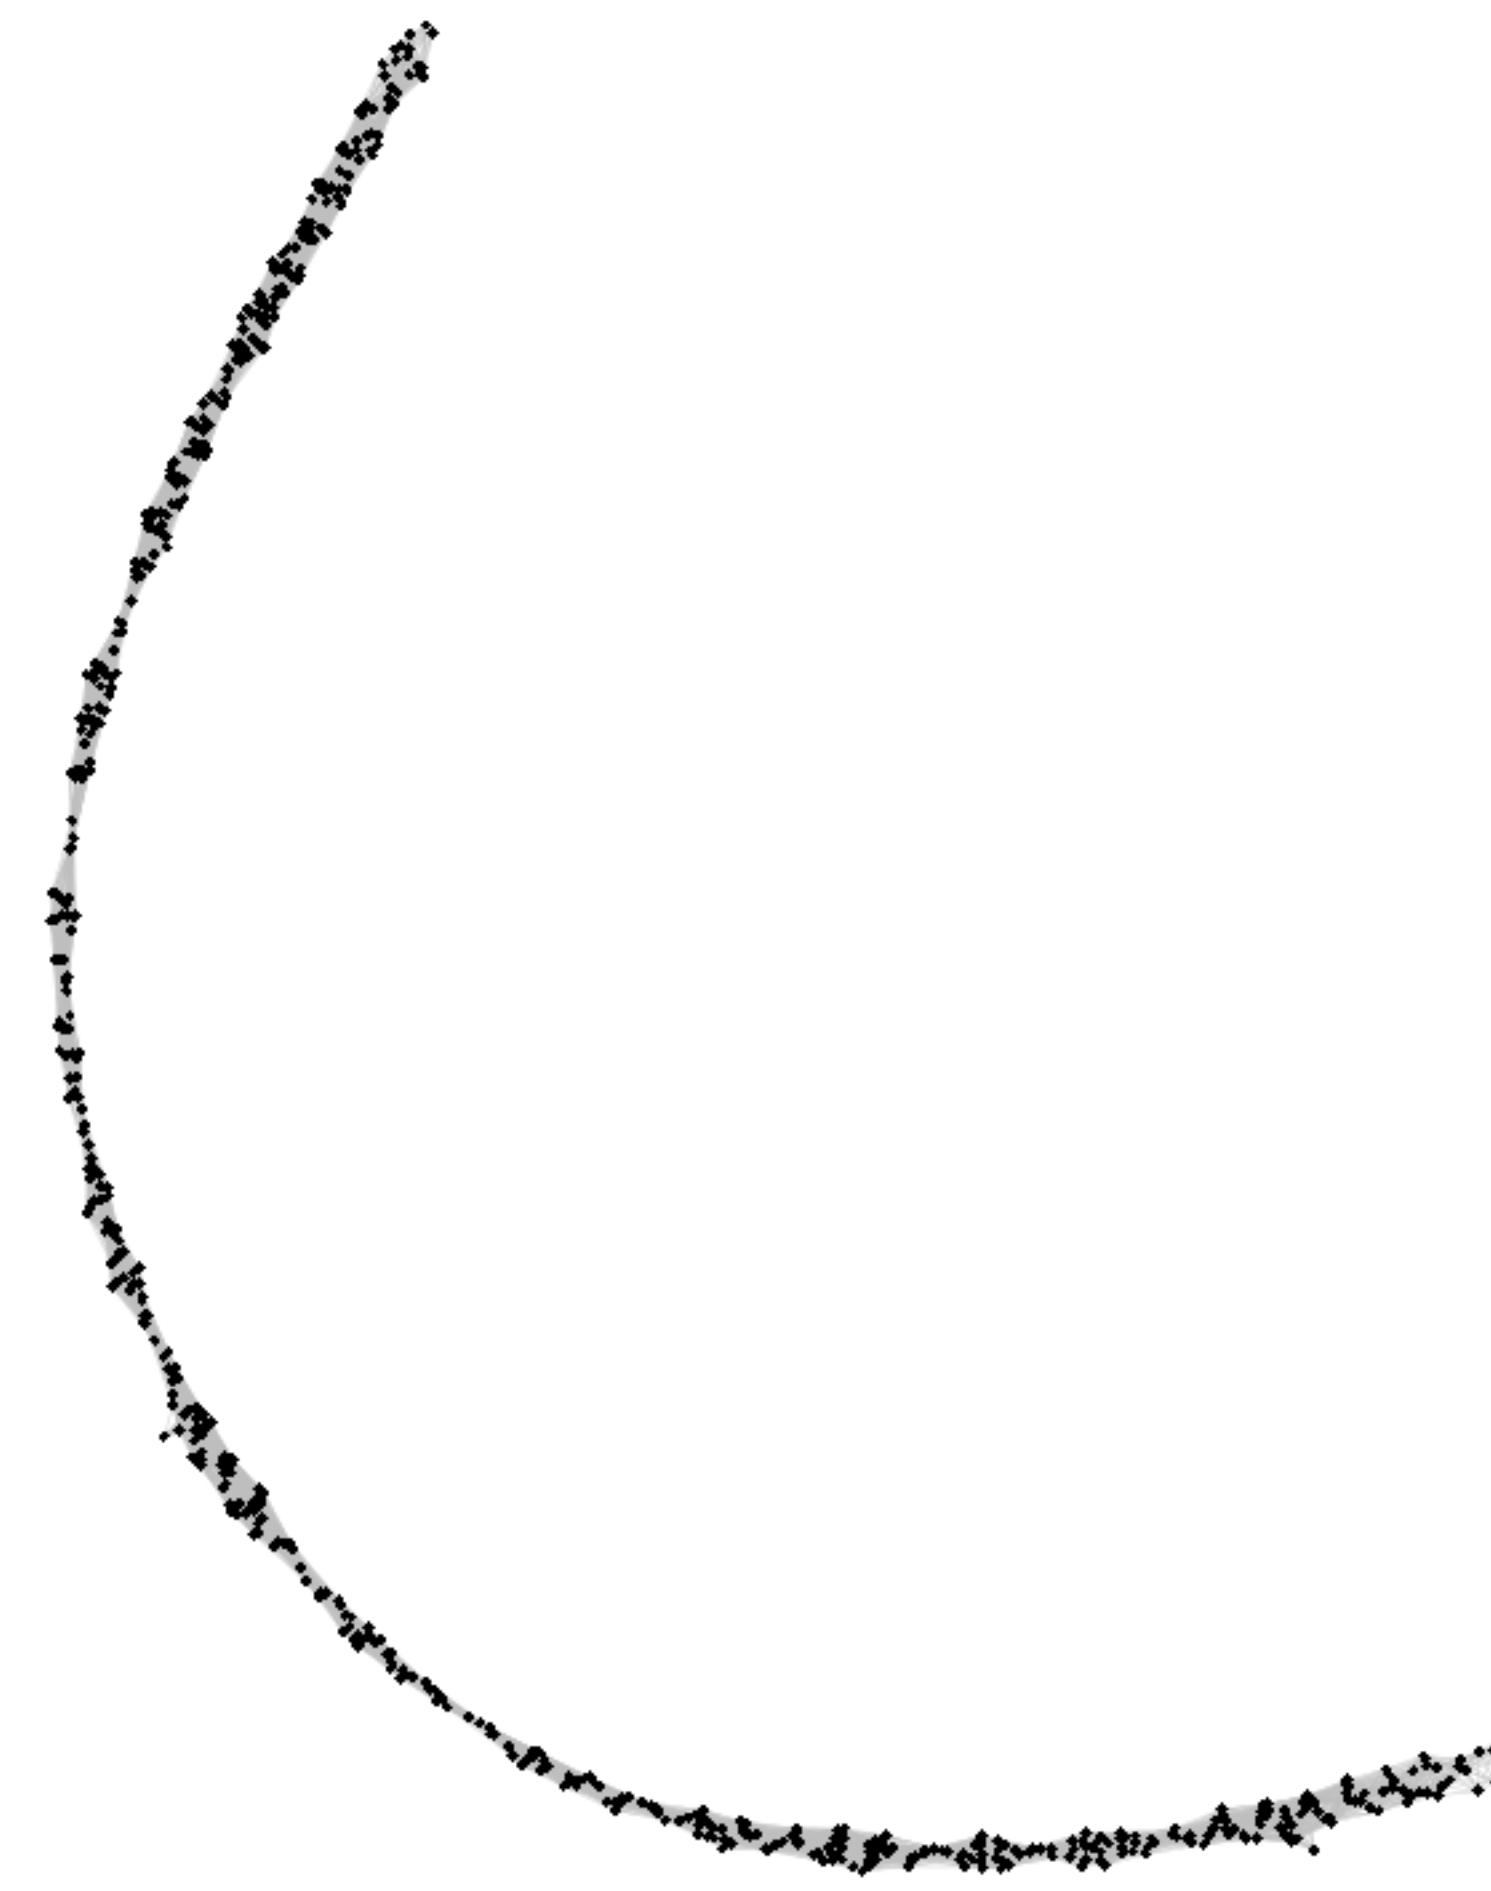

**CL147**

Number of reads: 628  
Number of pairs: 9000  
Density: 0.04571  
Diameter: NA  
Mean edge weigth: 214.11  
Max. degree: 47

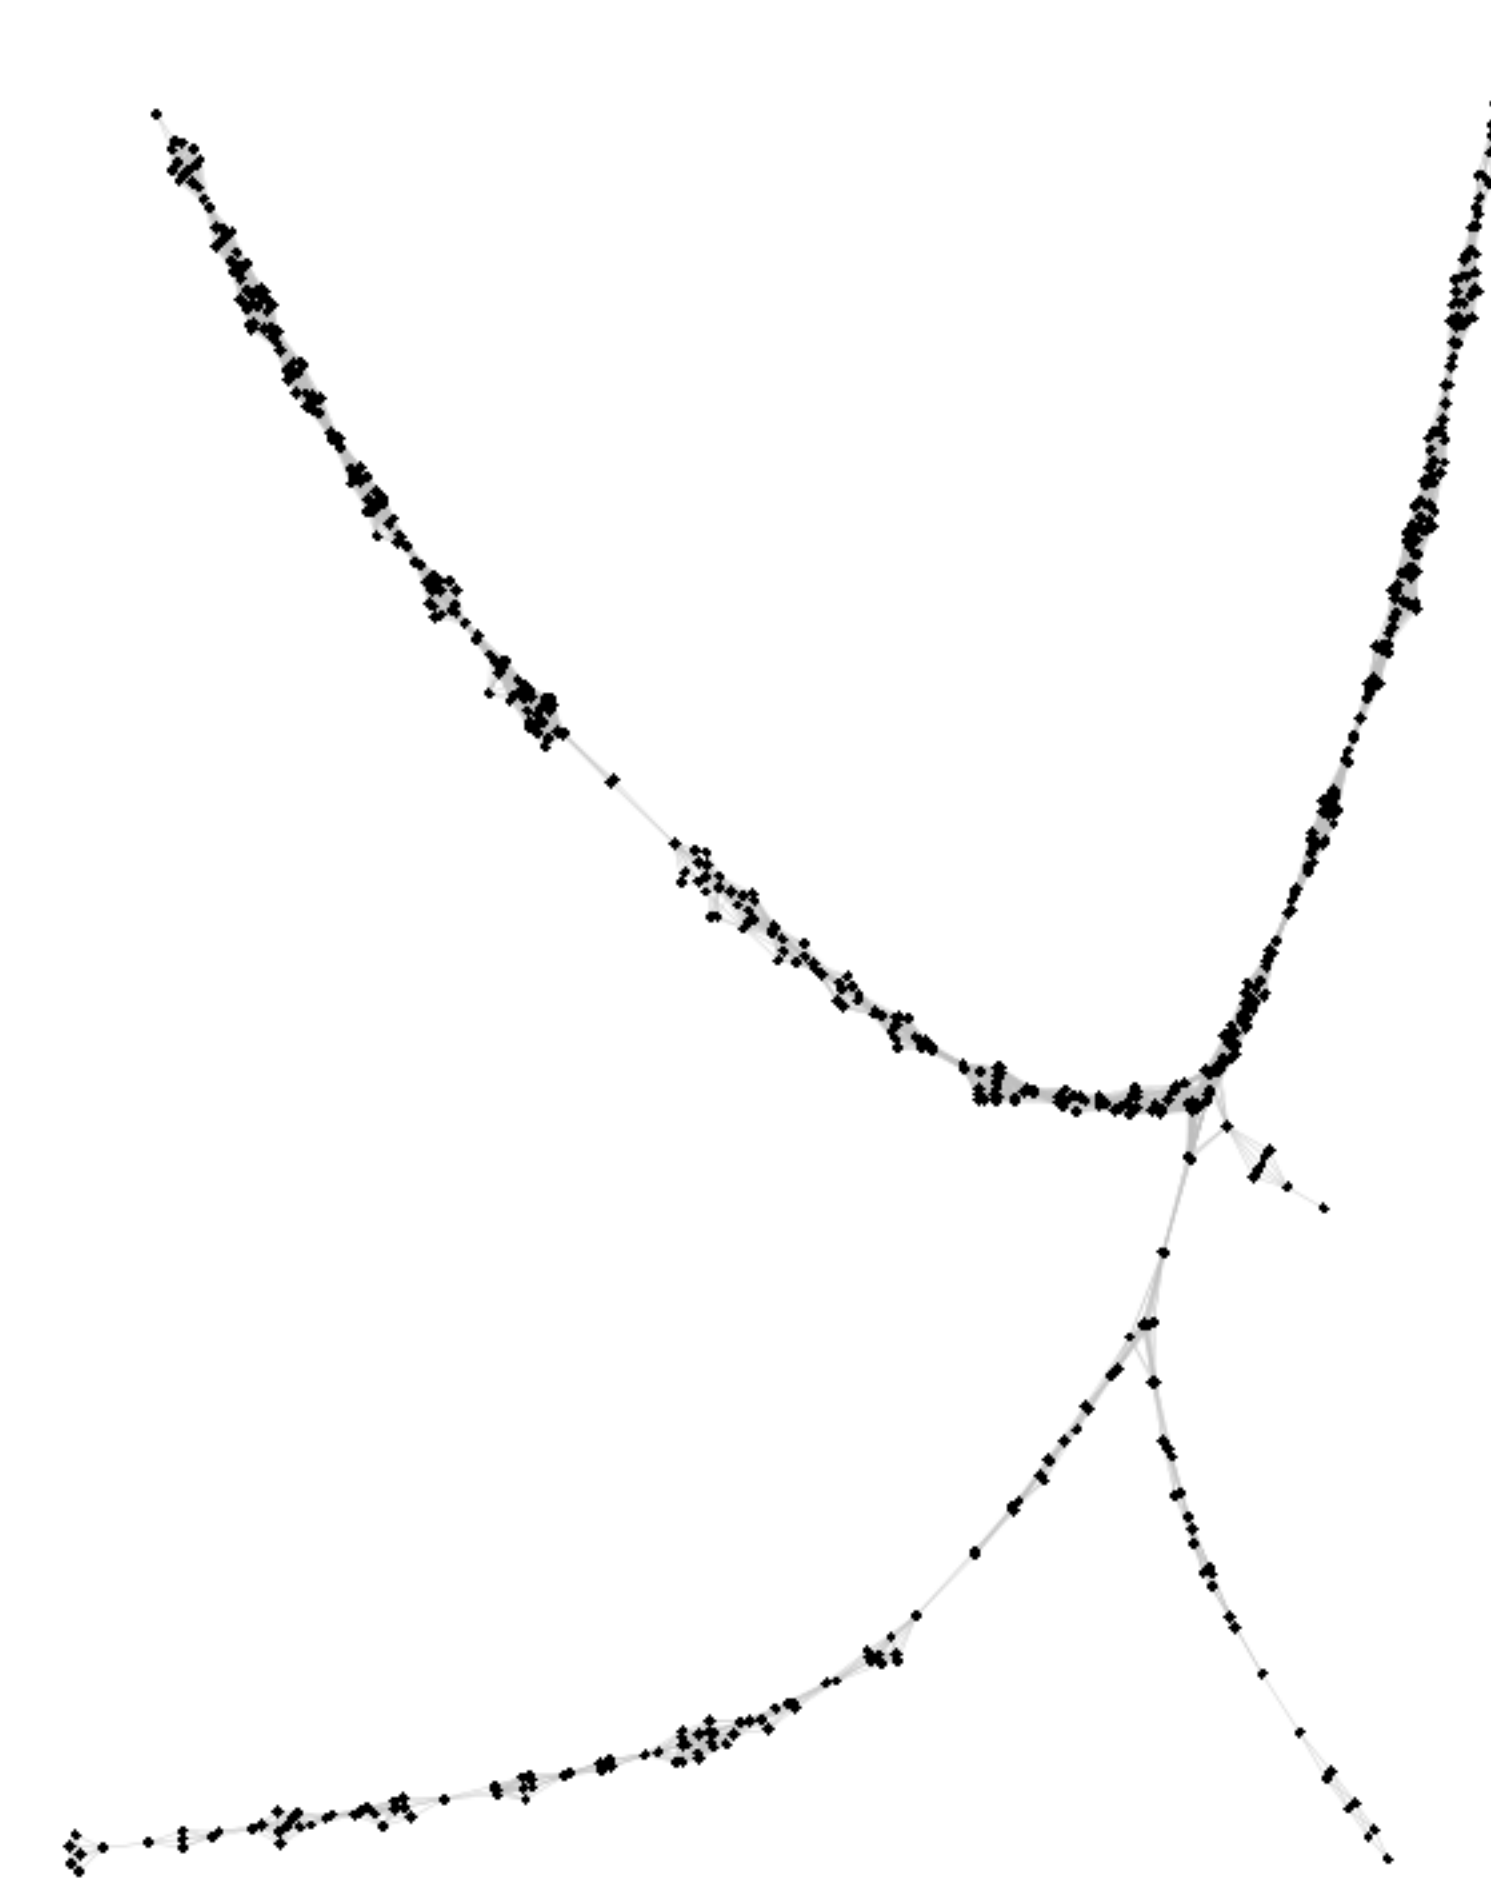

**CL148**

Number of reads: 625  
Number of pairs: 5736  
Density: 0.02942  
Diameter: NA  
Mean edge weigth: 216.12  
Max. degree: 37

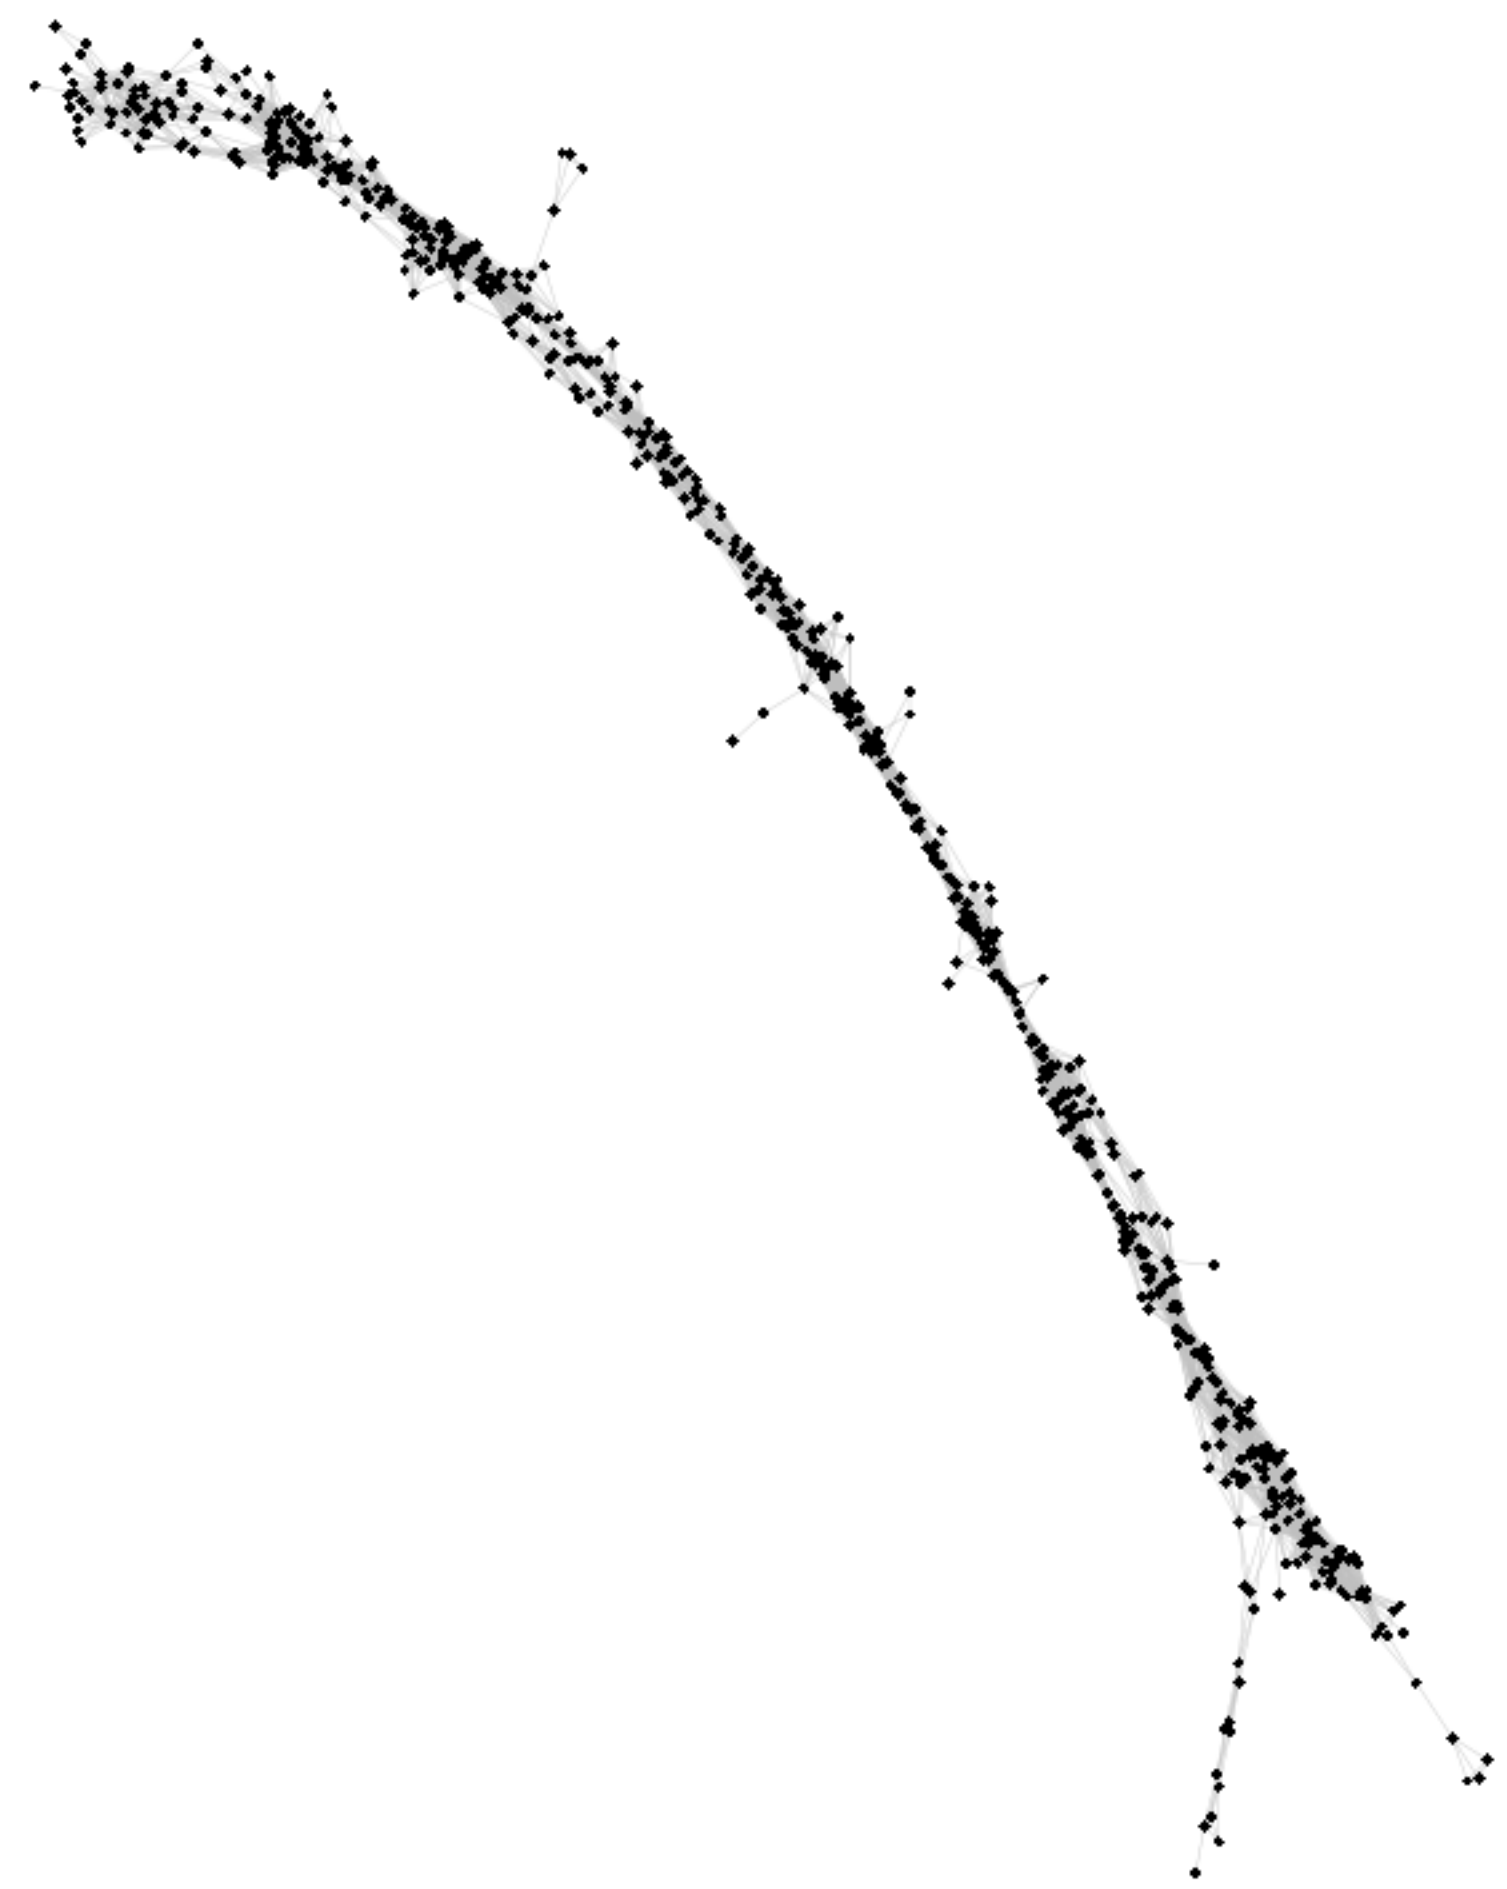

**CL149**

Number of reads: 618  
Number of pairs: 6983  
Density: 0.03663  
Diameter: NA  
Mean edge weigth: 165.06  
Max. degree: 44

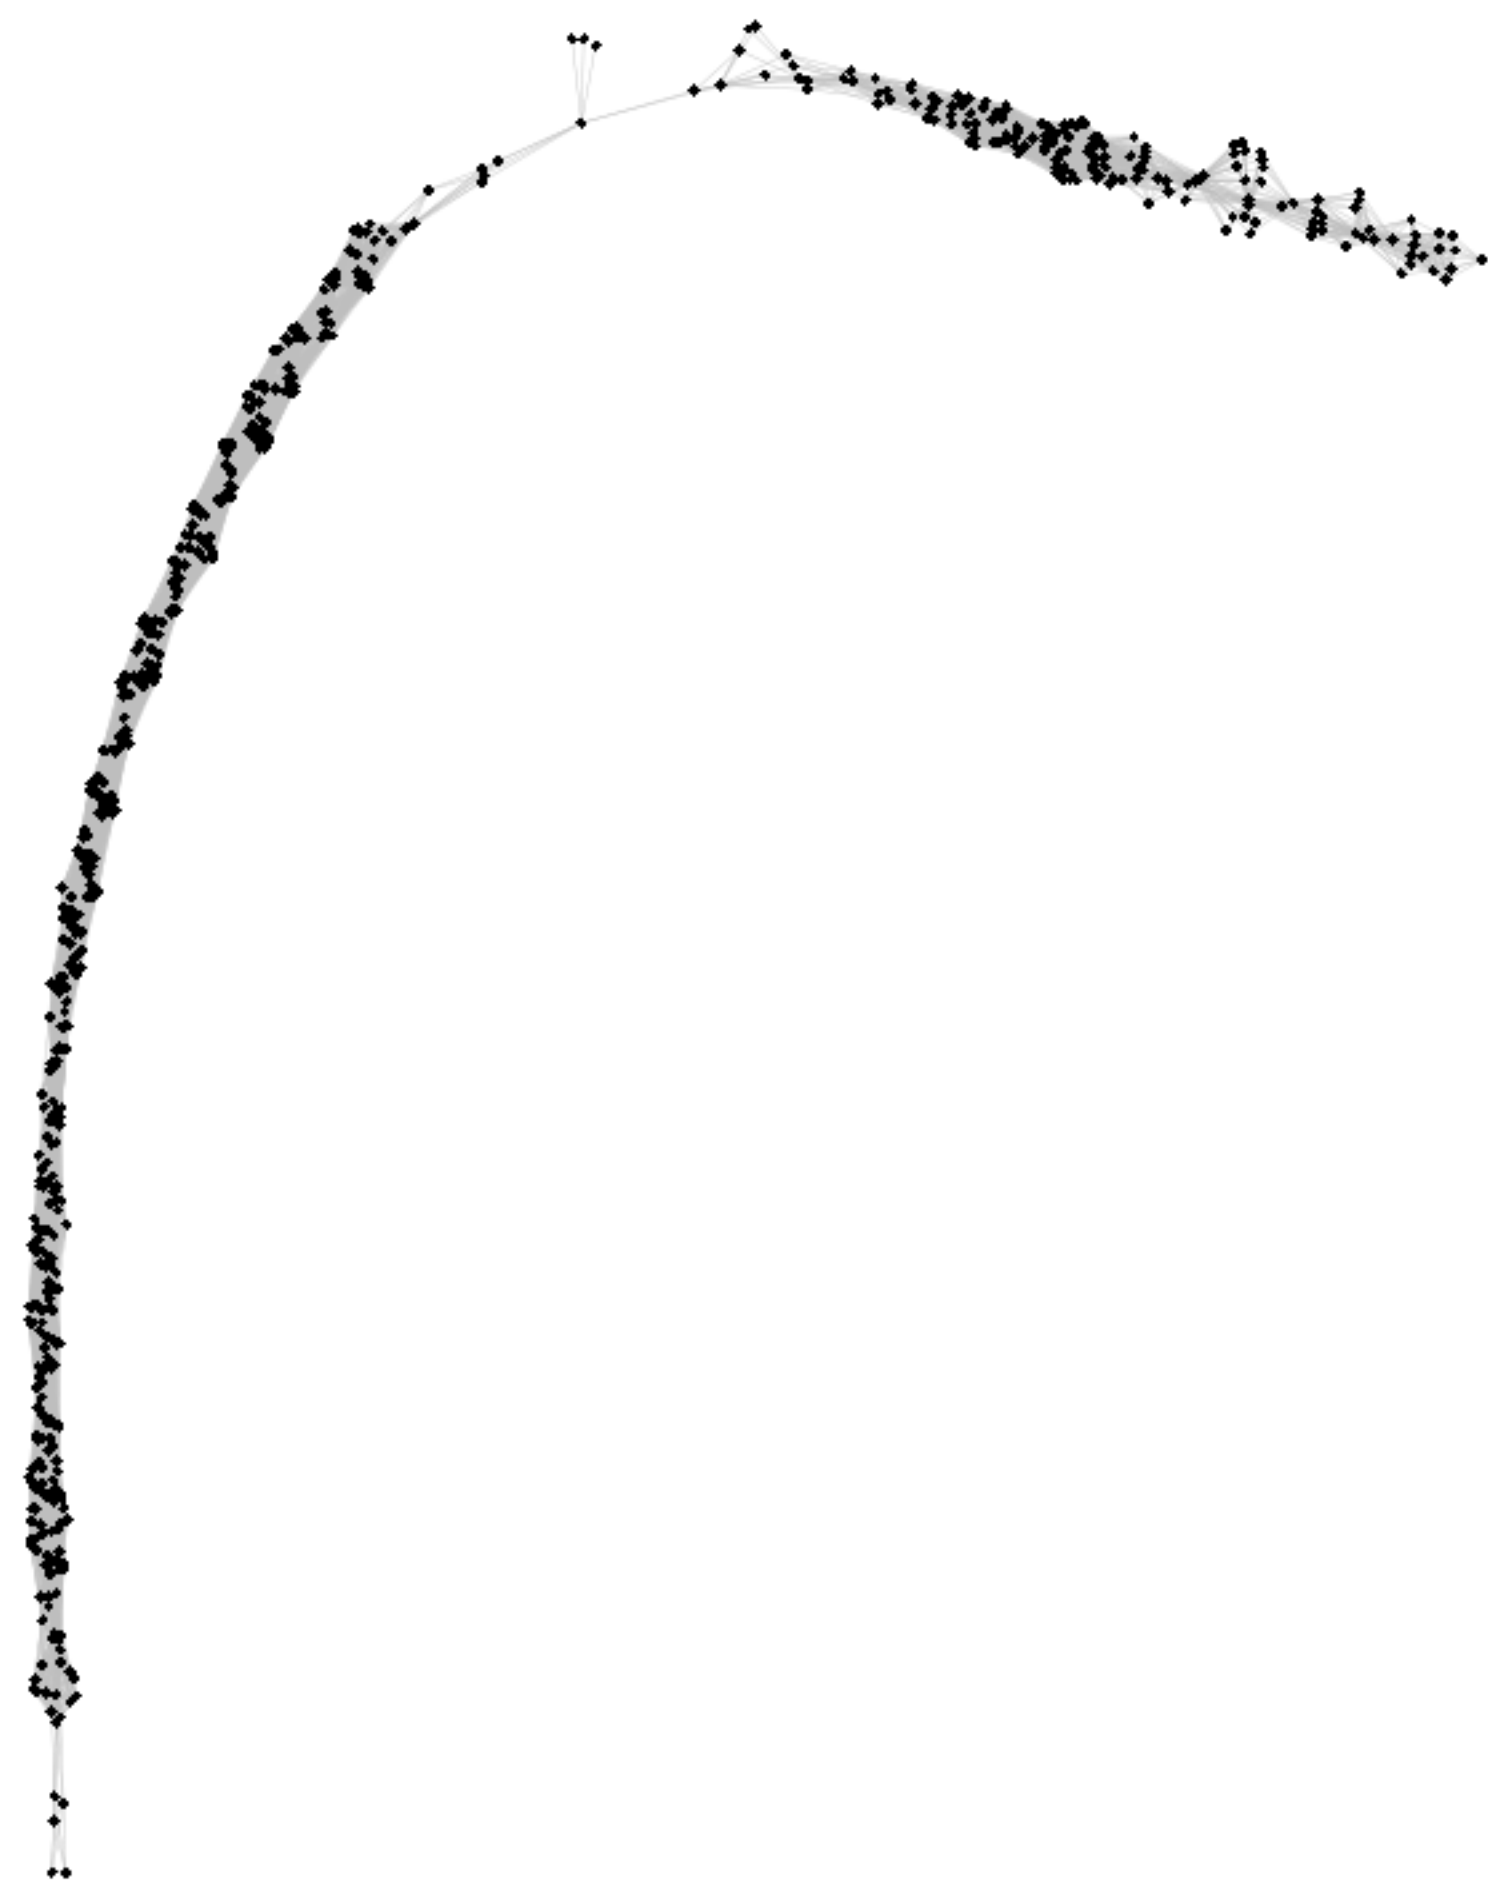

**CL150**

Number of reads: 608  
Number of pairs: 11681  
Density: 0.0633  
Diameter: NA  
Mean edge weigth: 215.89  
Max. degree: 60

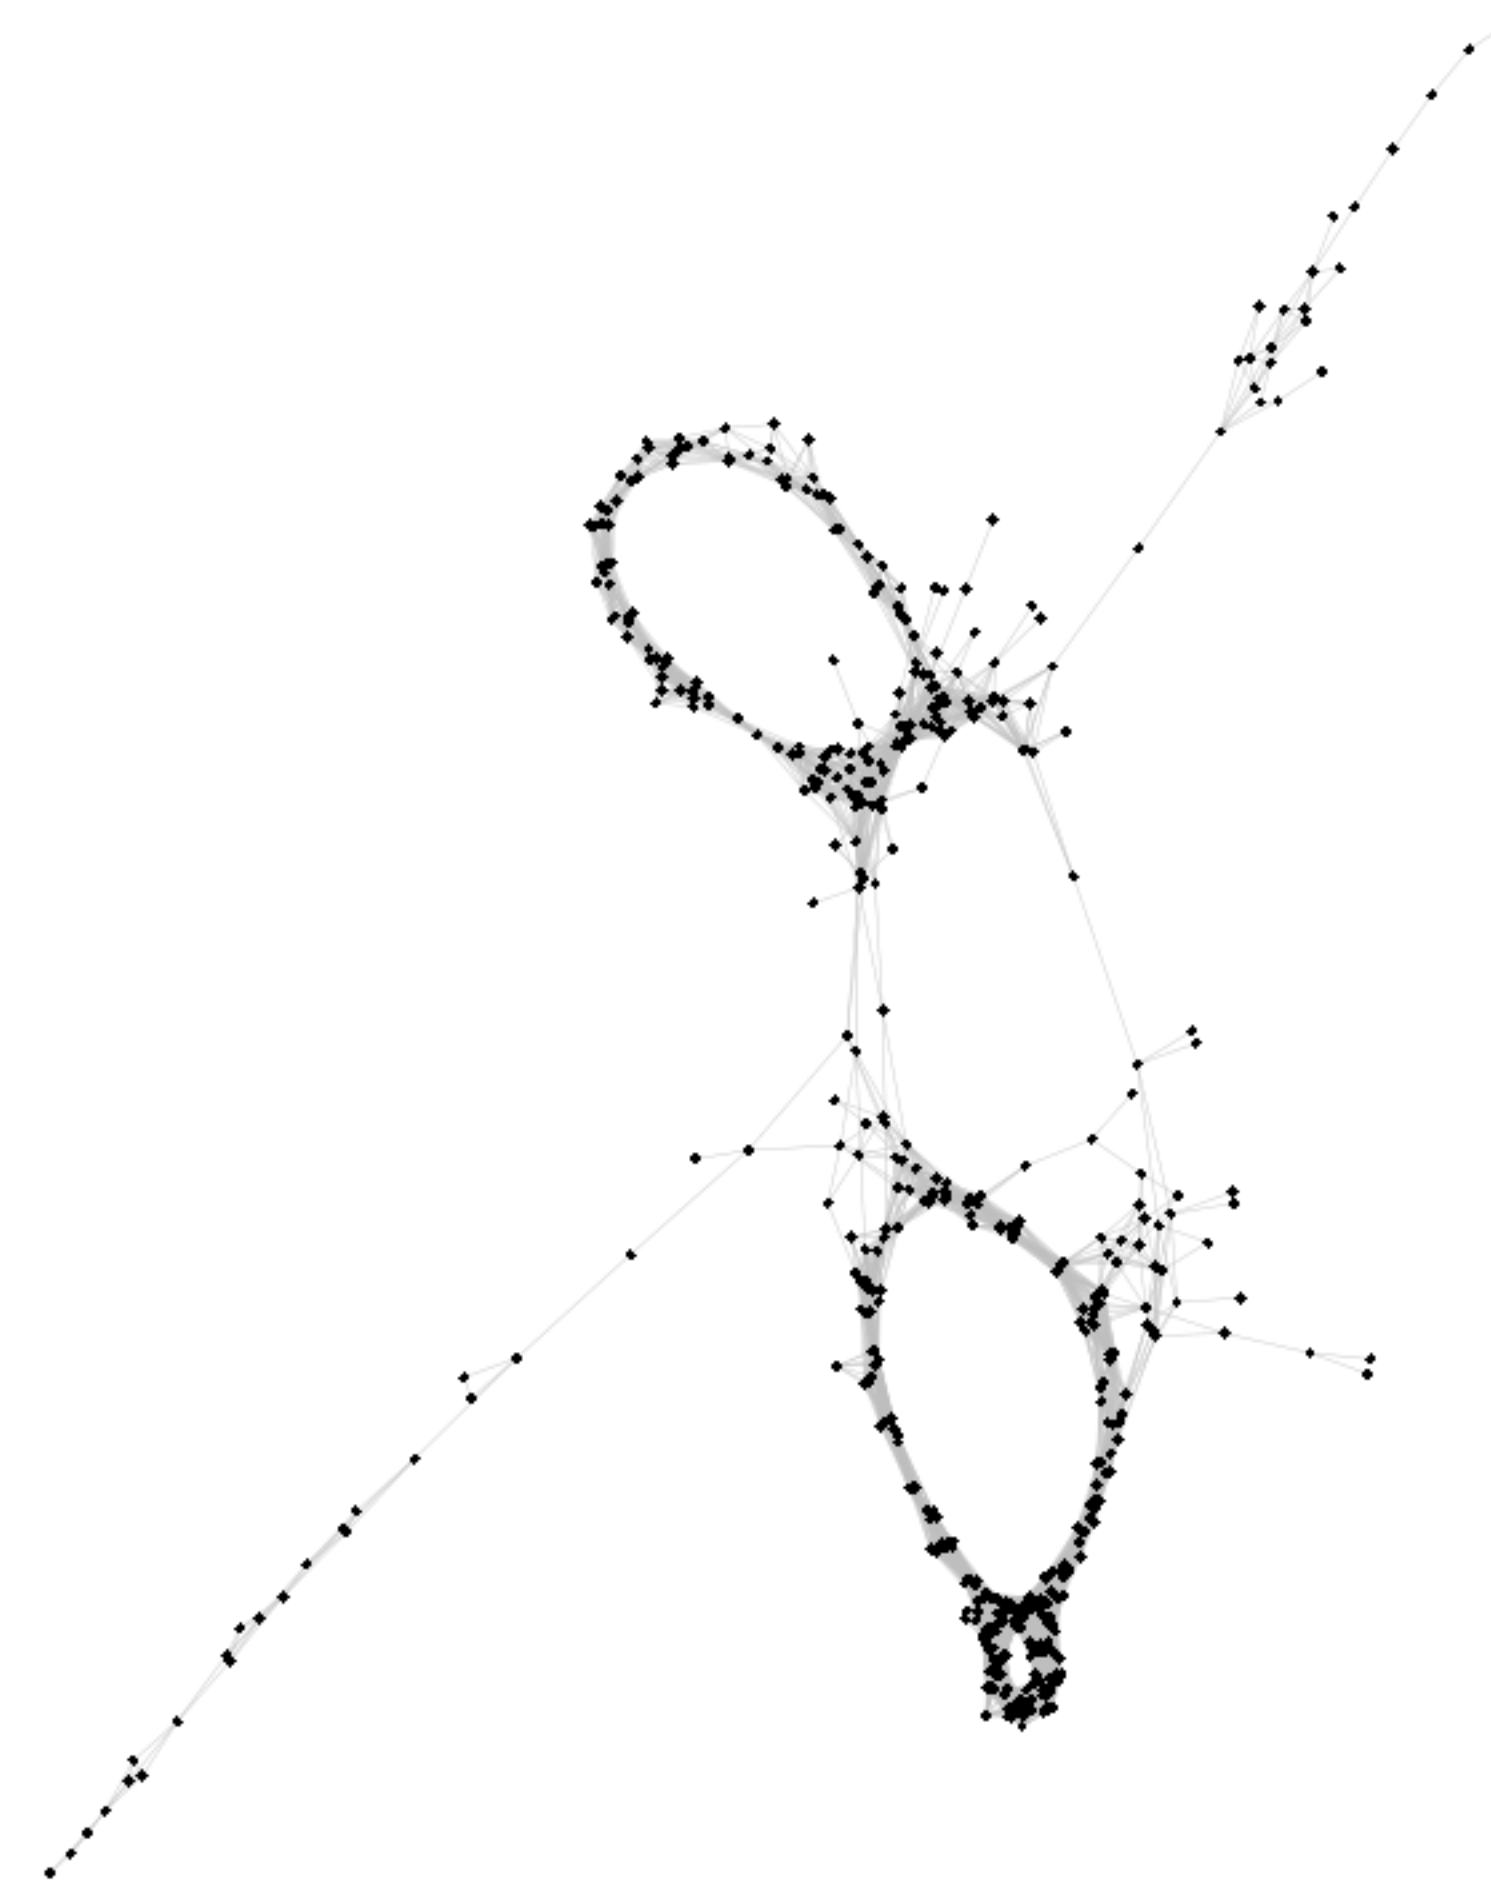

**CL151**

Number of reads: 548  
Number of pairs: 7841  
Density: 0.05232  
Diameter: NA  
Mean edge weigth: 186.89  
Max. degree: 88

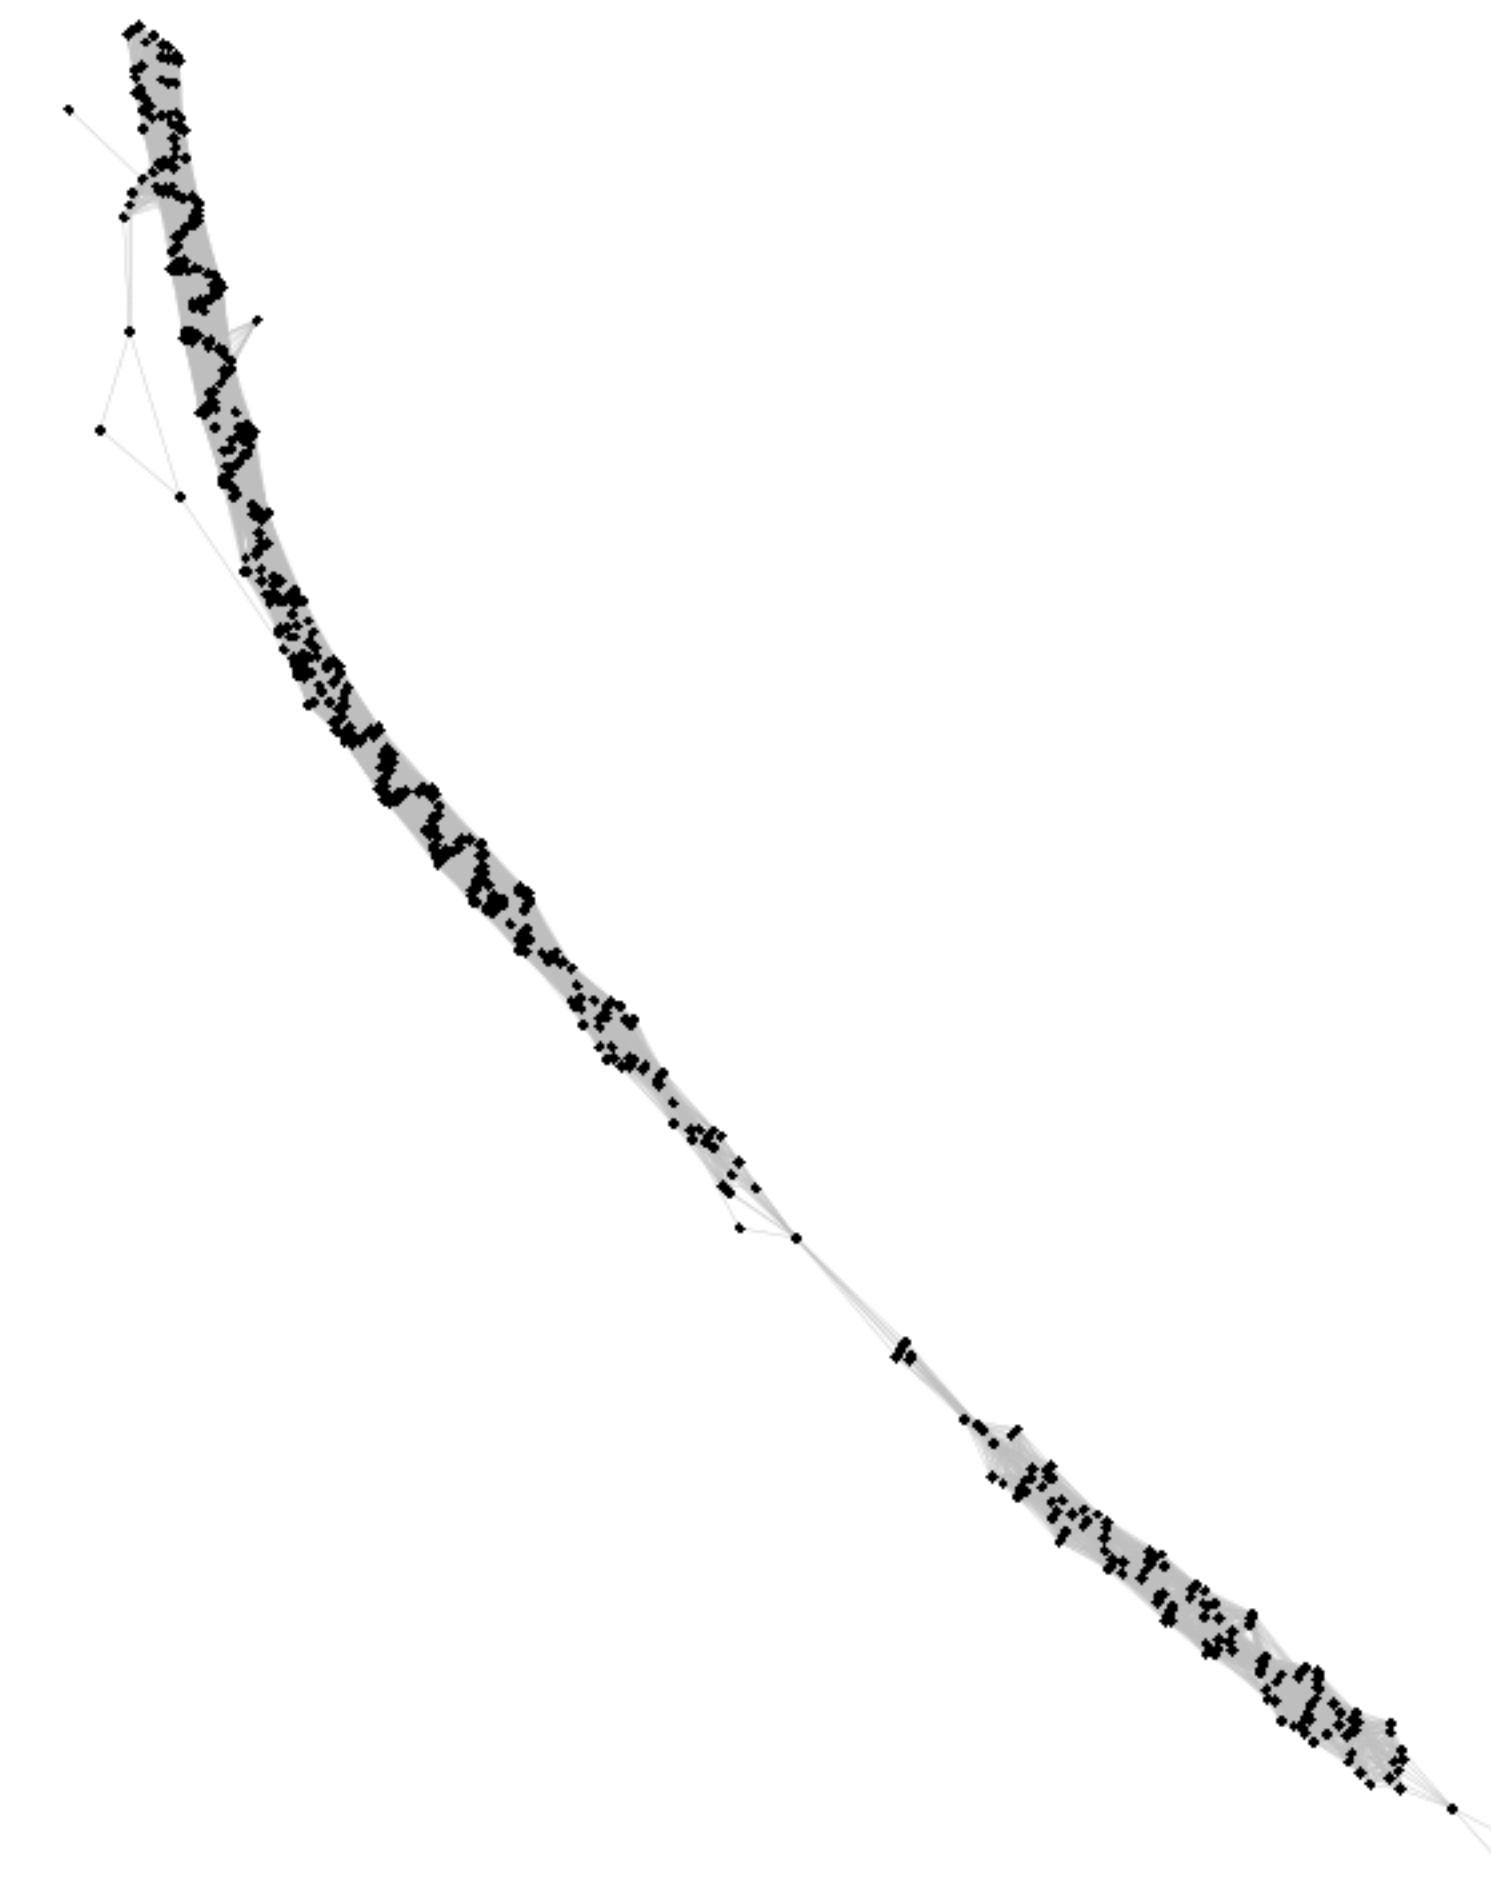

**CL152**

Number of reads: 546  
Number of pairs: 13168  
Density: 0.0885  
Diameter: NA  
Mean edge weigth: 214.53  
Max. degree: 74

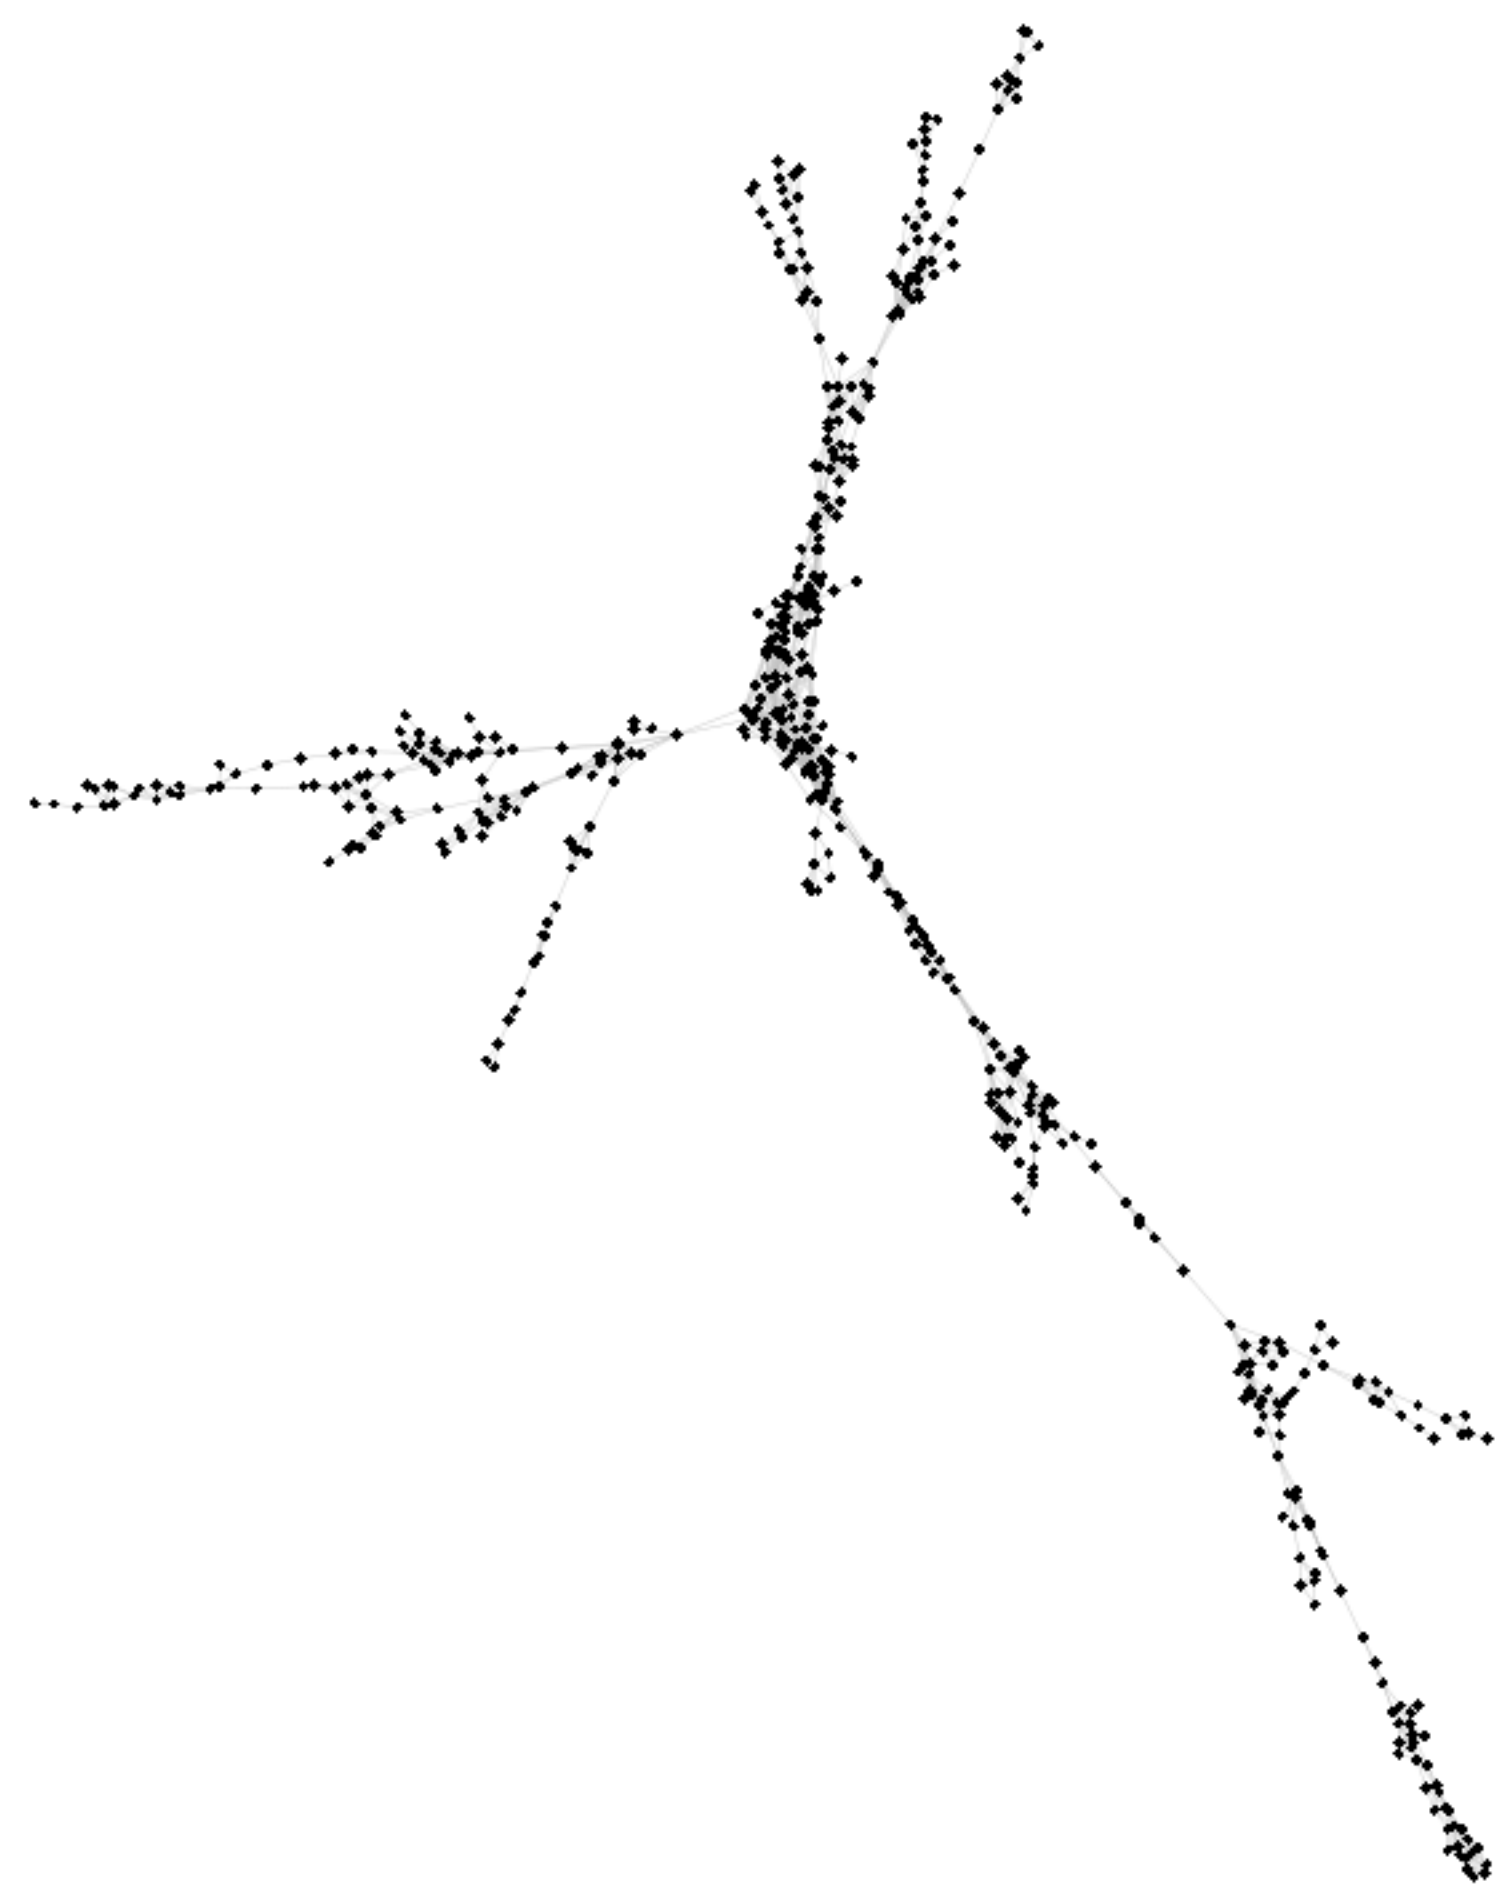

**CL153**

Number of reads: 518  
Number of pairs: 1644  
Density: 0.01228  
Diameter: NA  
Mean edge weigth: 156.76  
Max. degree: 26

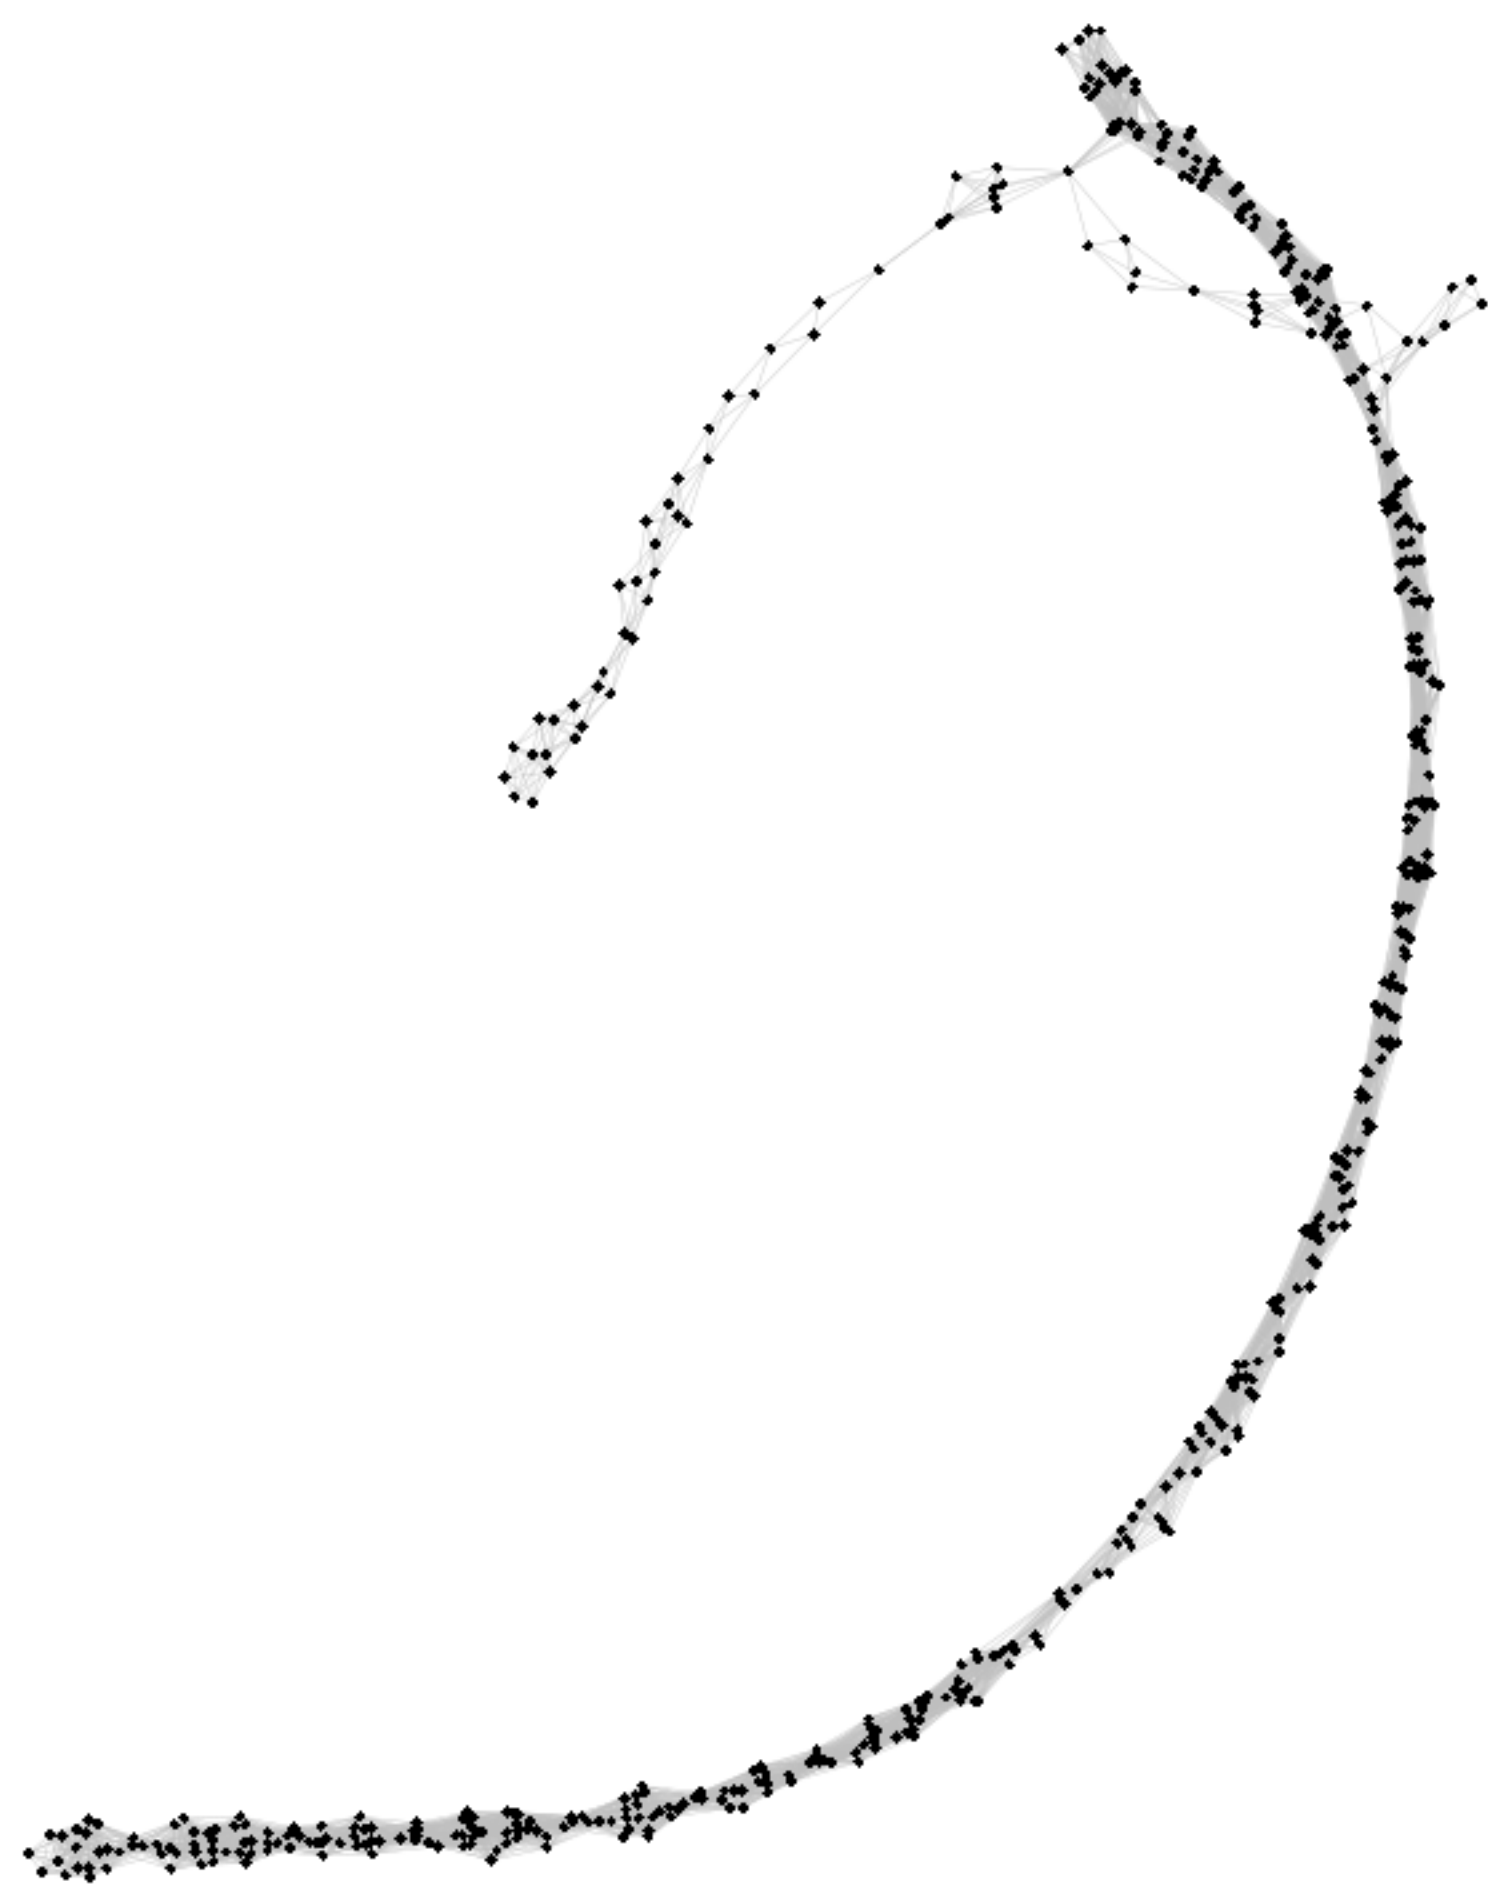

**CL154**

Number of reads: 514  
Number of pairs: 5737  
Density: 0.04351  
Diameter: NA  
Mean edge weigth: 214.33  
Max. degree: 32

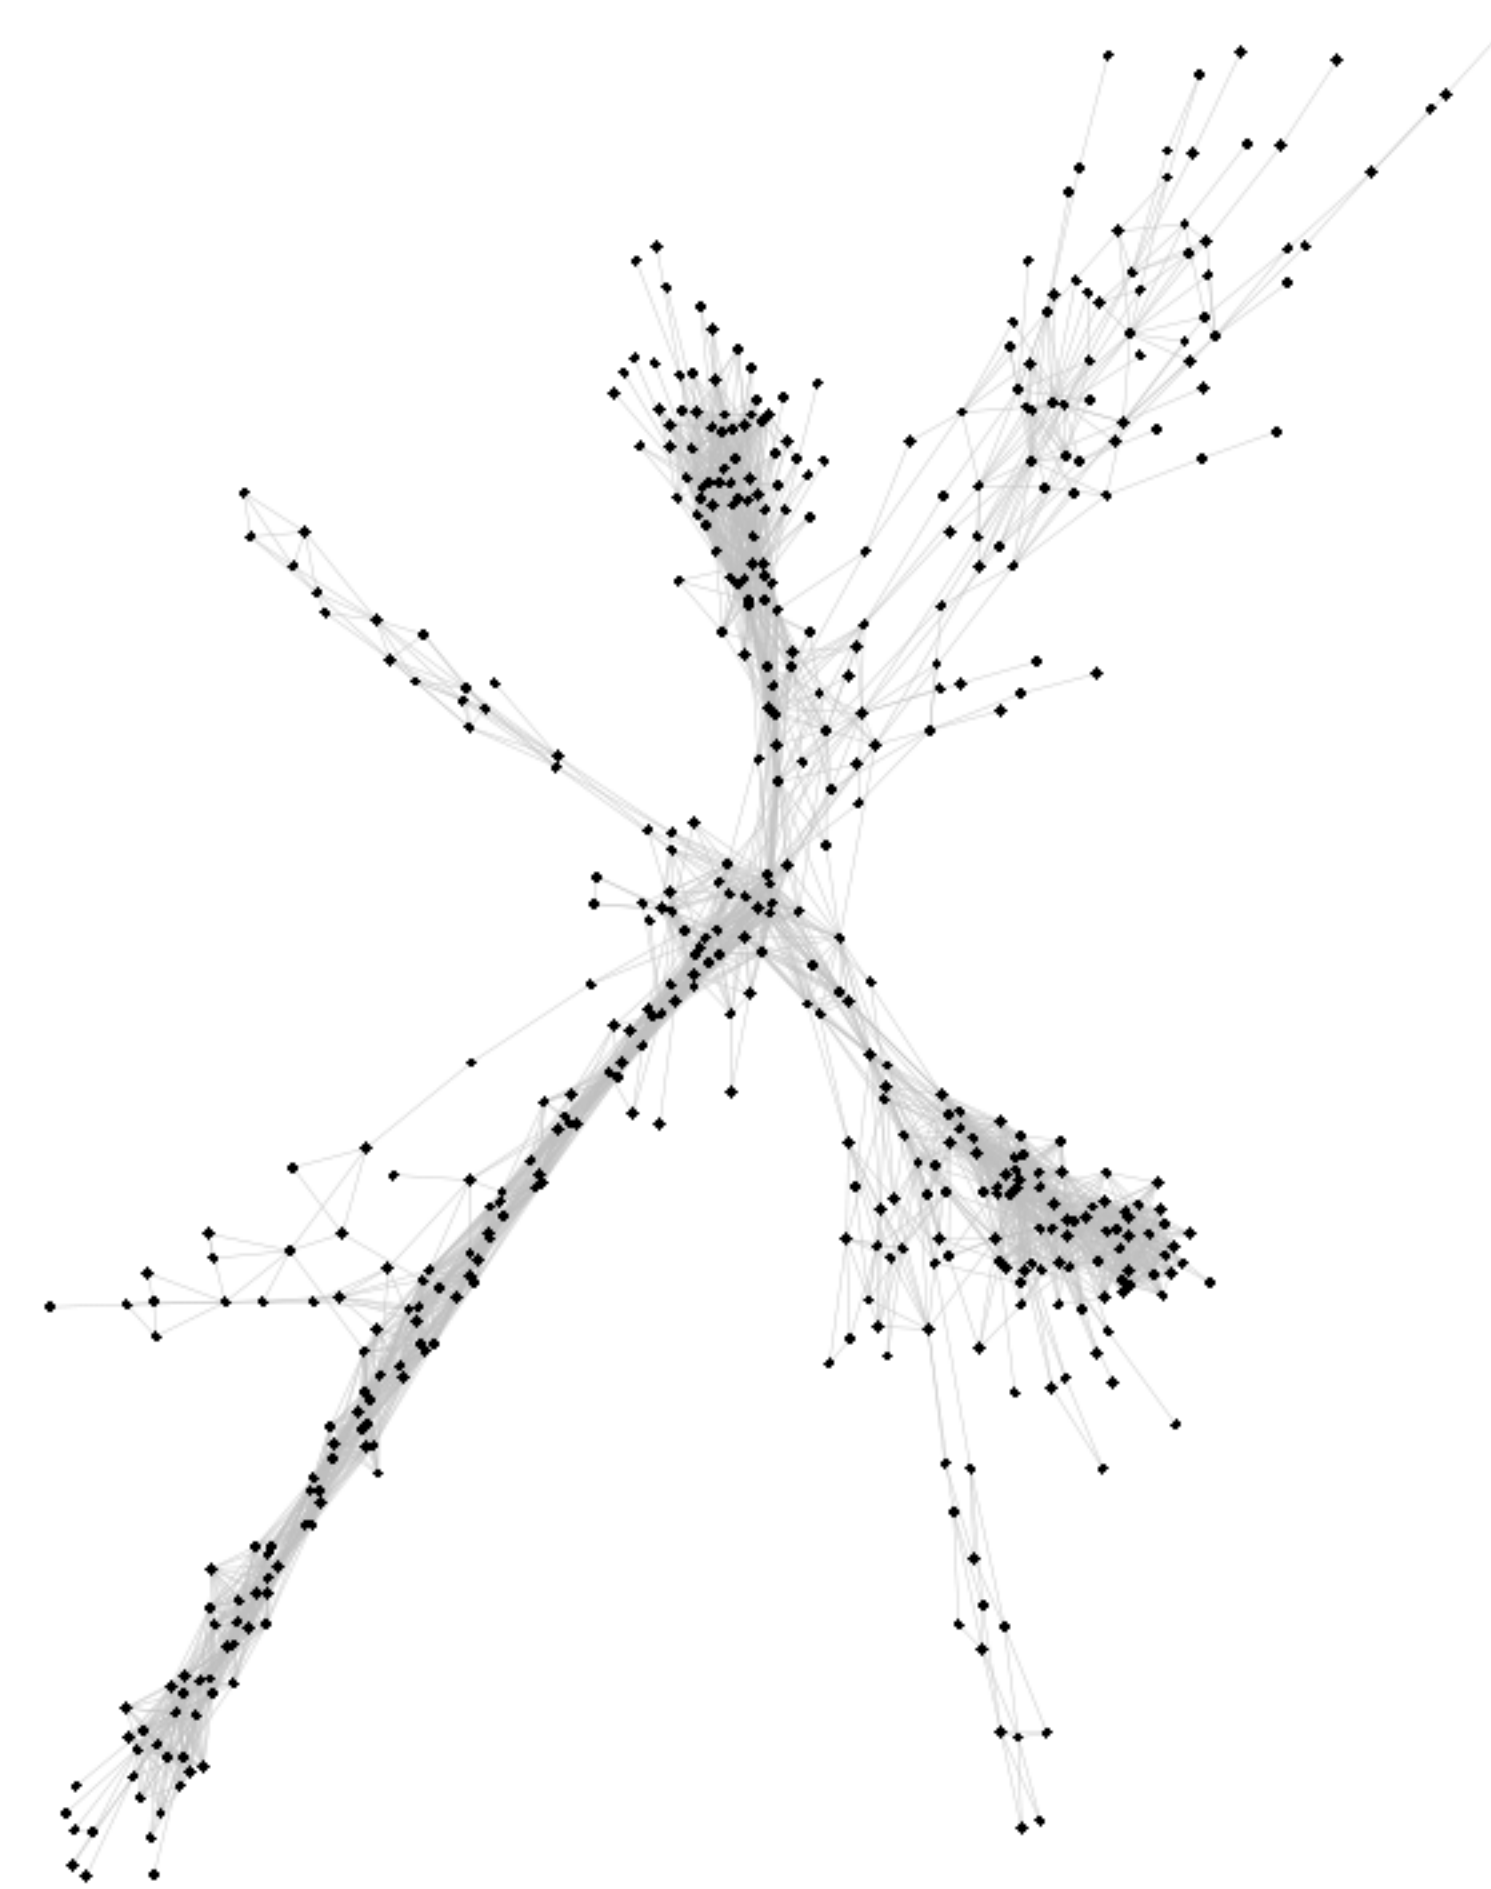

**CL155**

Number of reads: 483  
Number of pairs: 3329  
Density: 0.0286  
Diameter: NA  
Mean edge weigth: 161.46  
Max. degree: 46

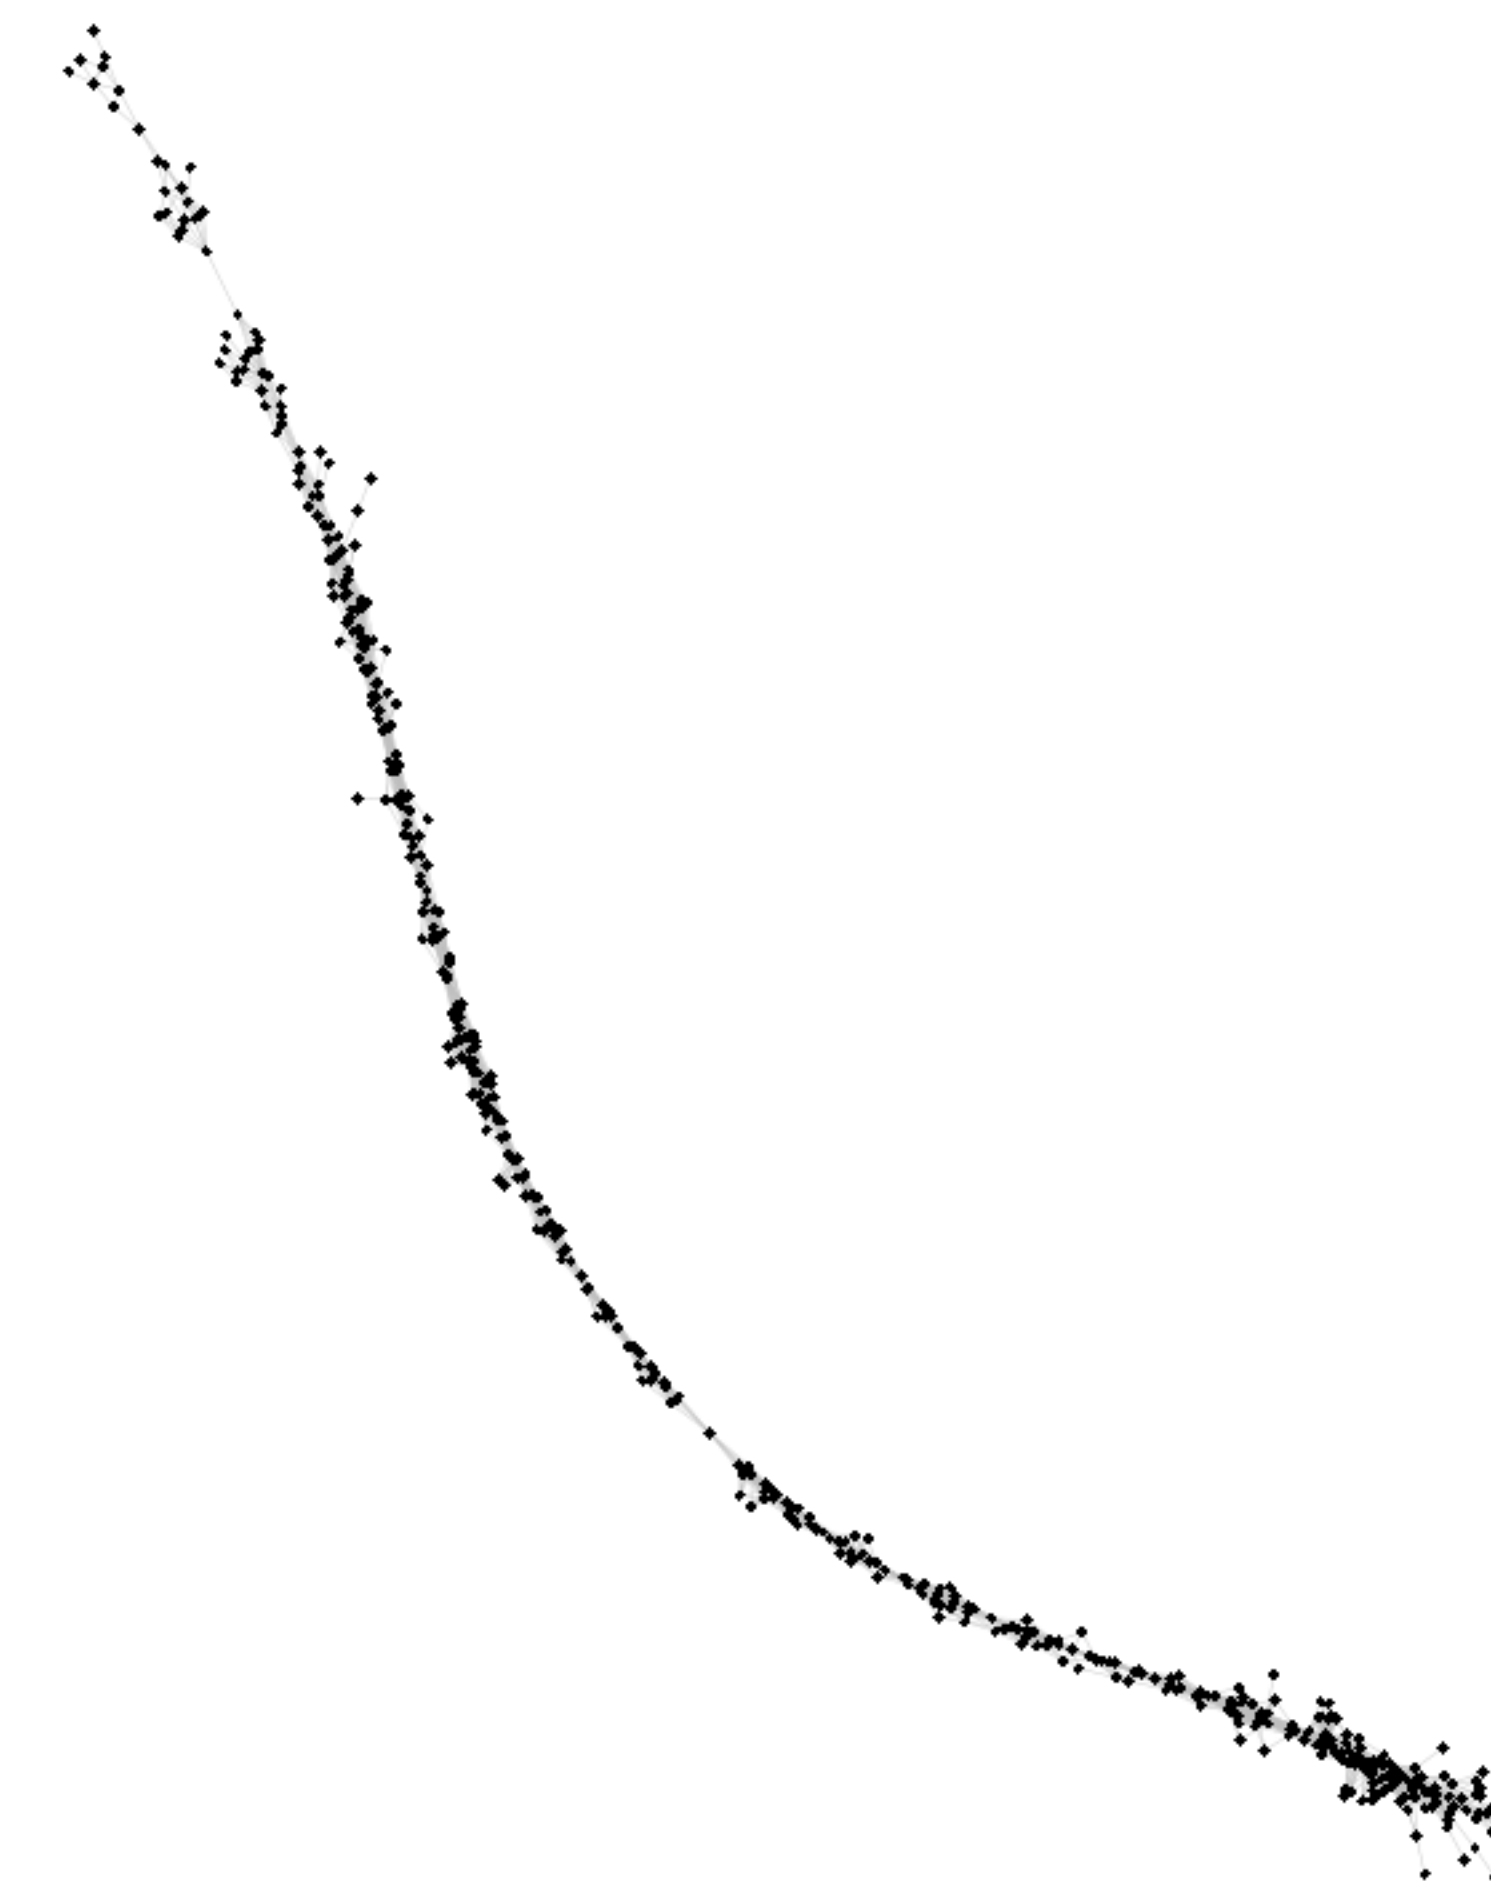

**CL156**

Number of reads: 478  
Number of pairs: 3432  
Density: 0.0301  
Diameter: NA  
Mean edge weigth: 166.07  
Max. degree: 40

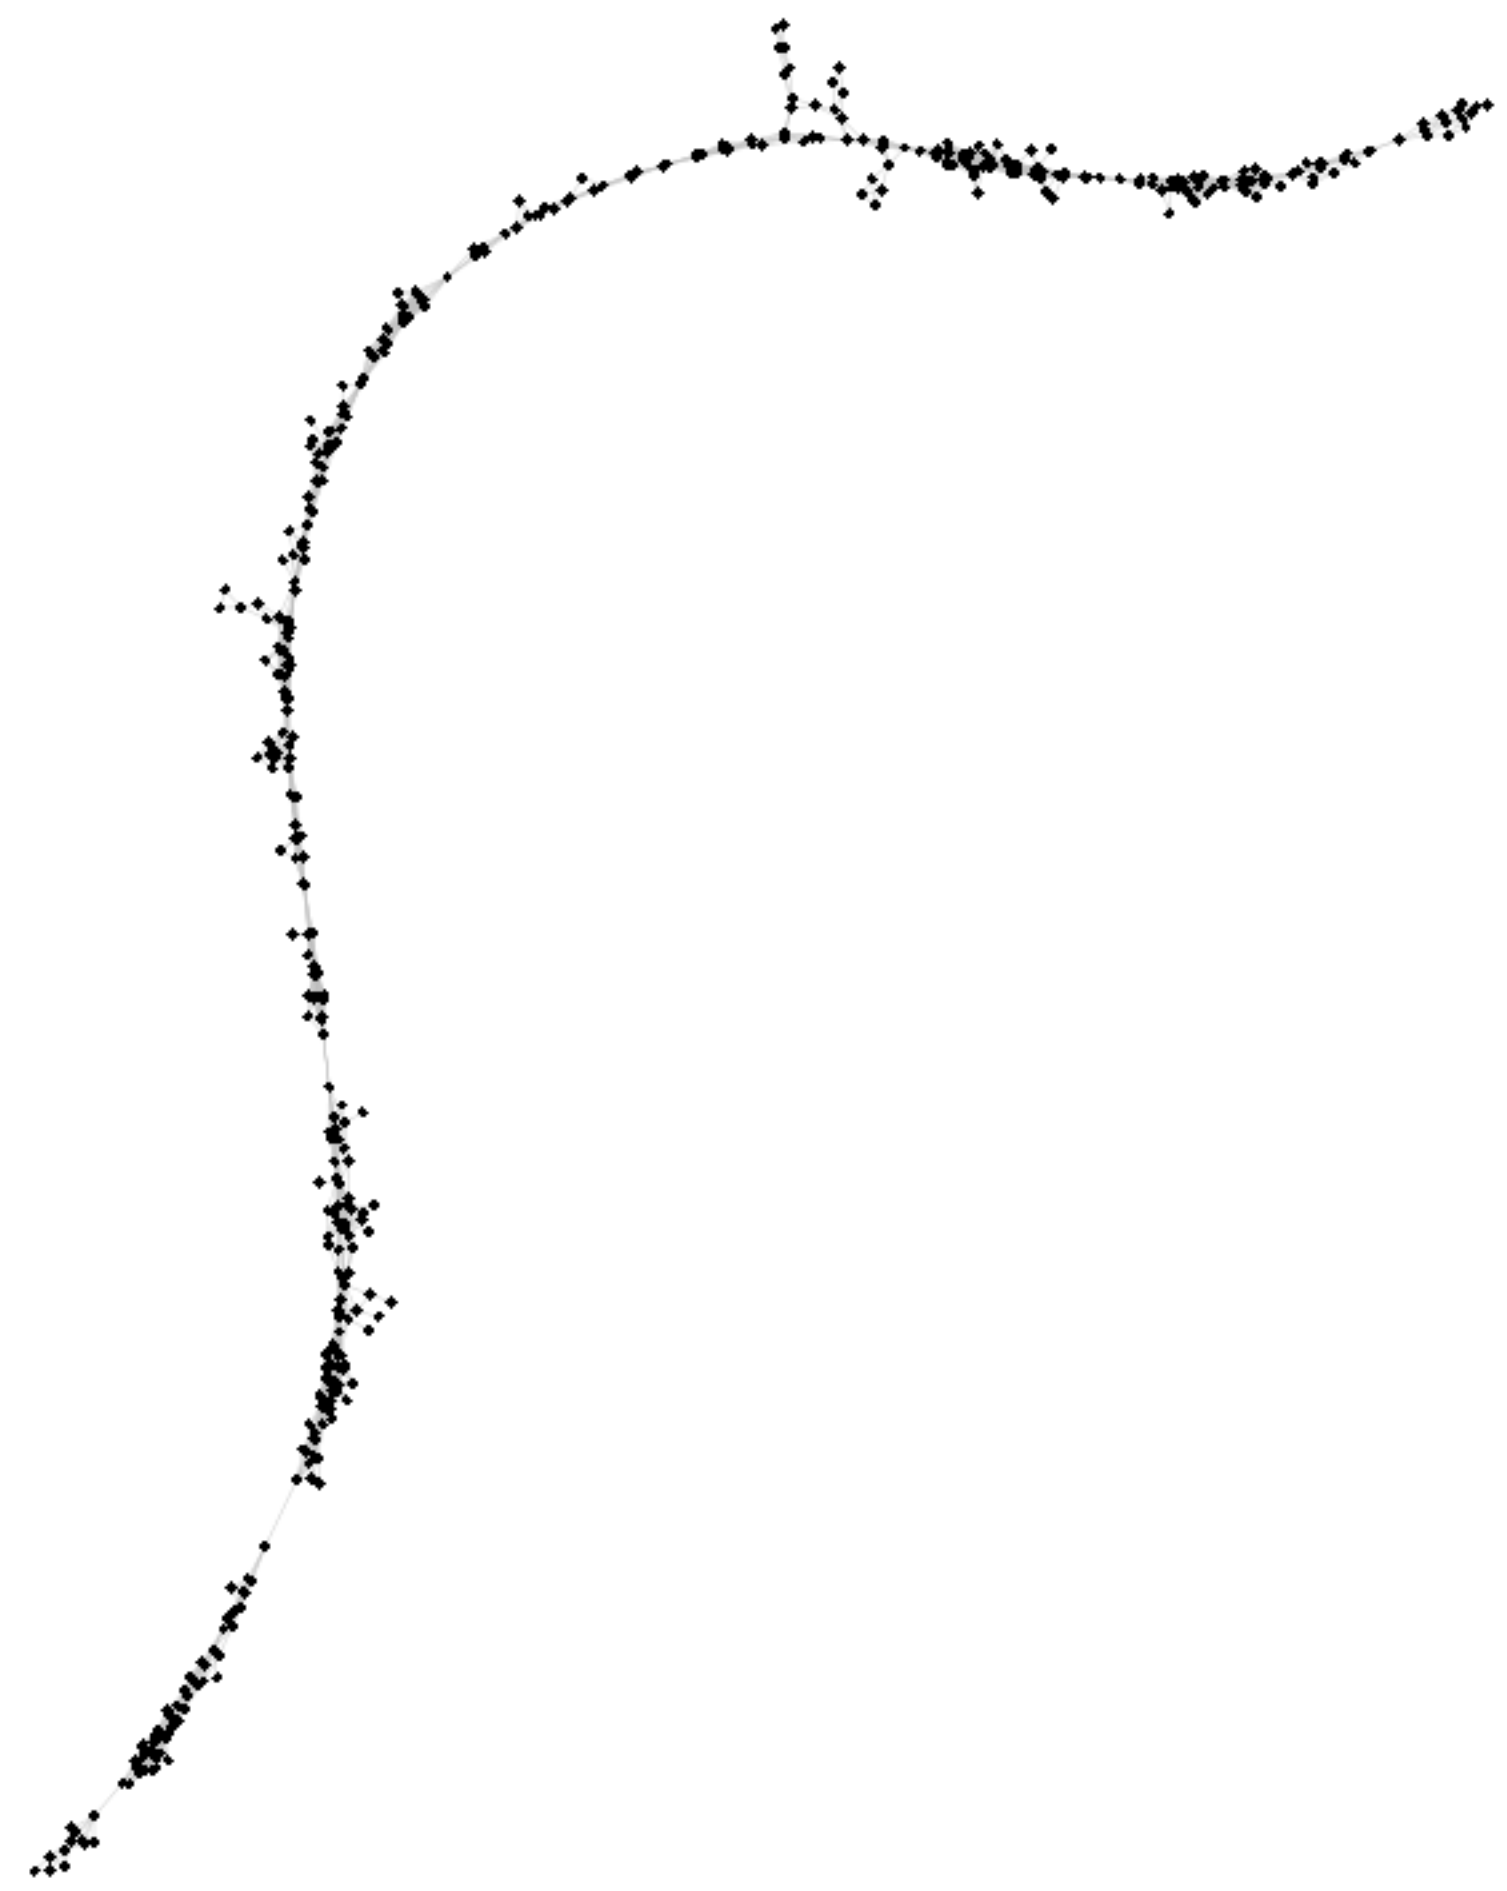

**CL157**

Number of reads: 470  
 Number of pairs: 2472  
 Density: 0.02243  
 Diameter: NA  
 Mean edge weight: 165.36  
 Max. degree: 28

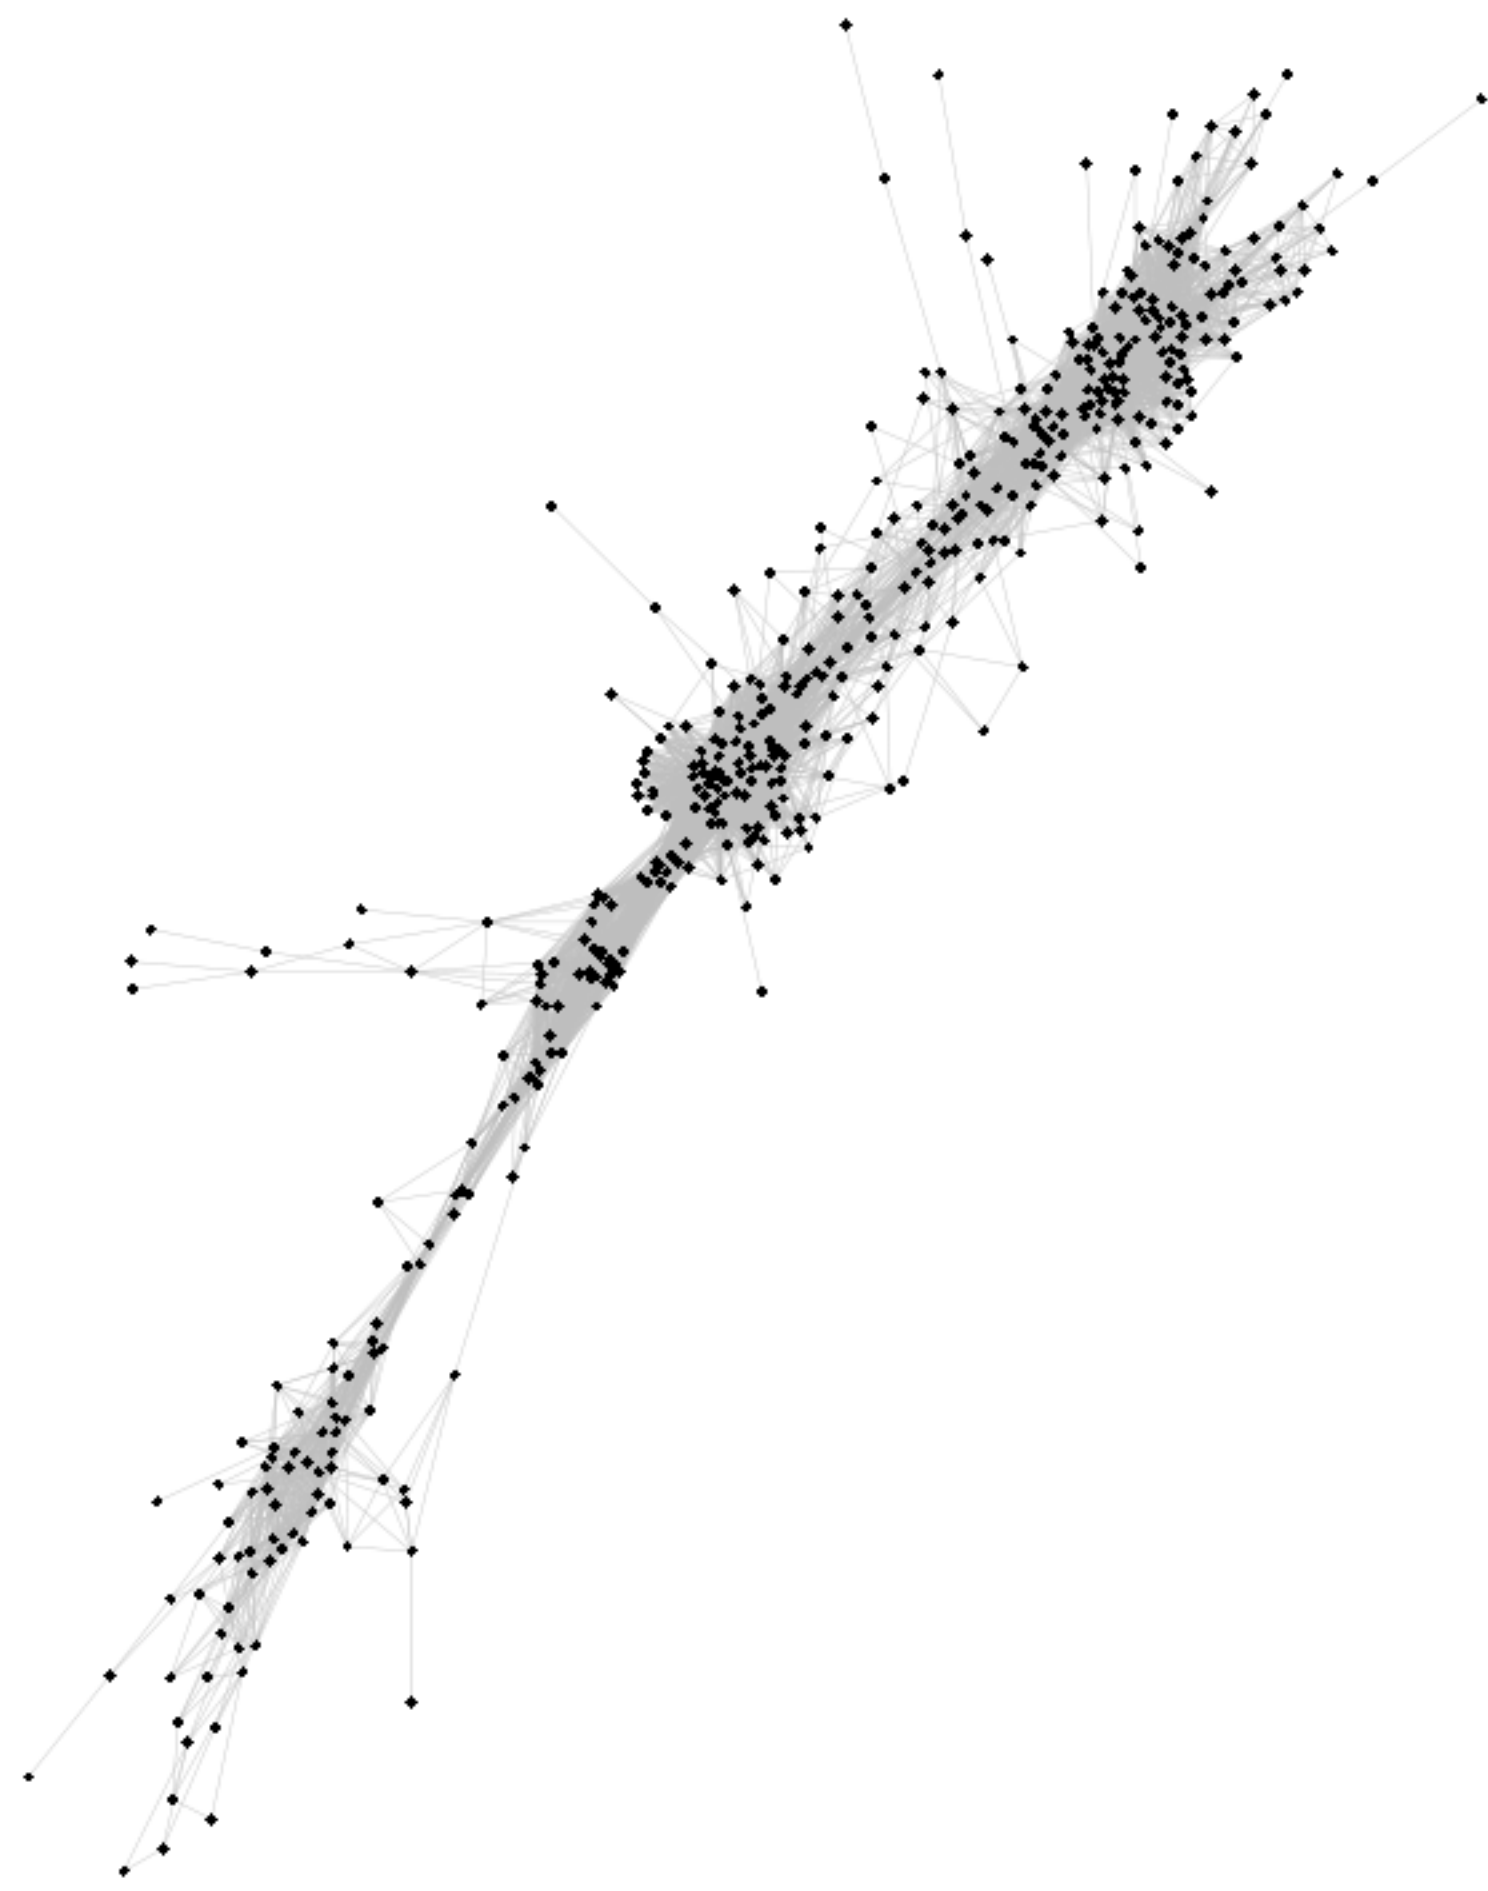

**CL158**

Number of reads: 463  
 Number of pairs: 7140  
 Density: 0.06676  
 Diameter: NA  
 Mean edge weight: 147.16  
 Max. degree: 99

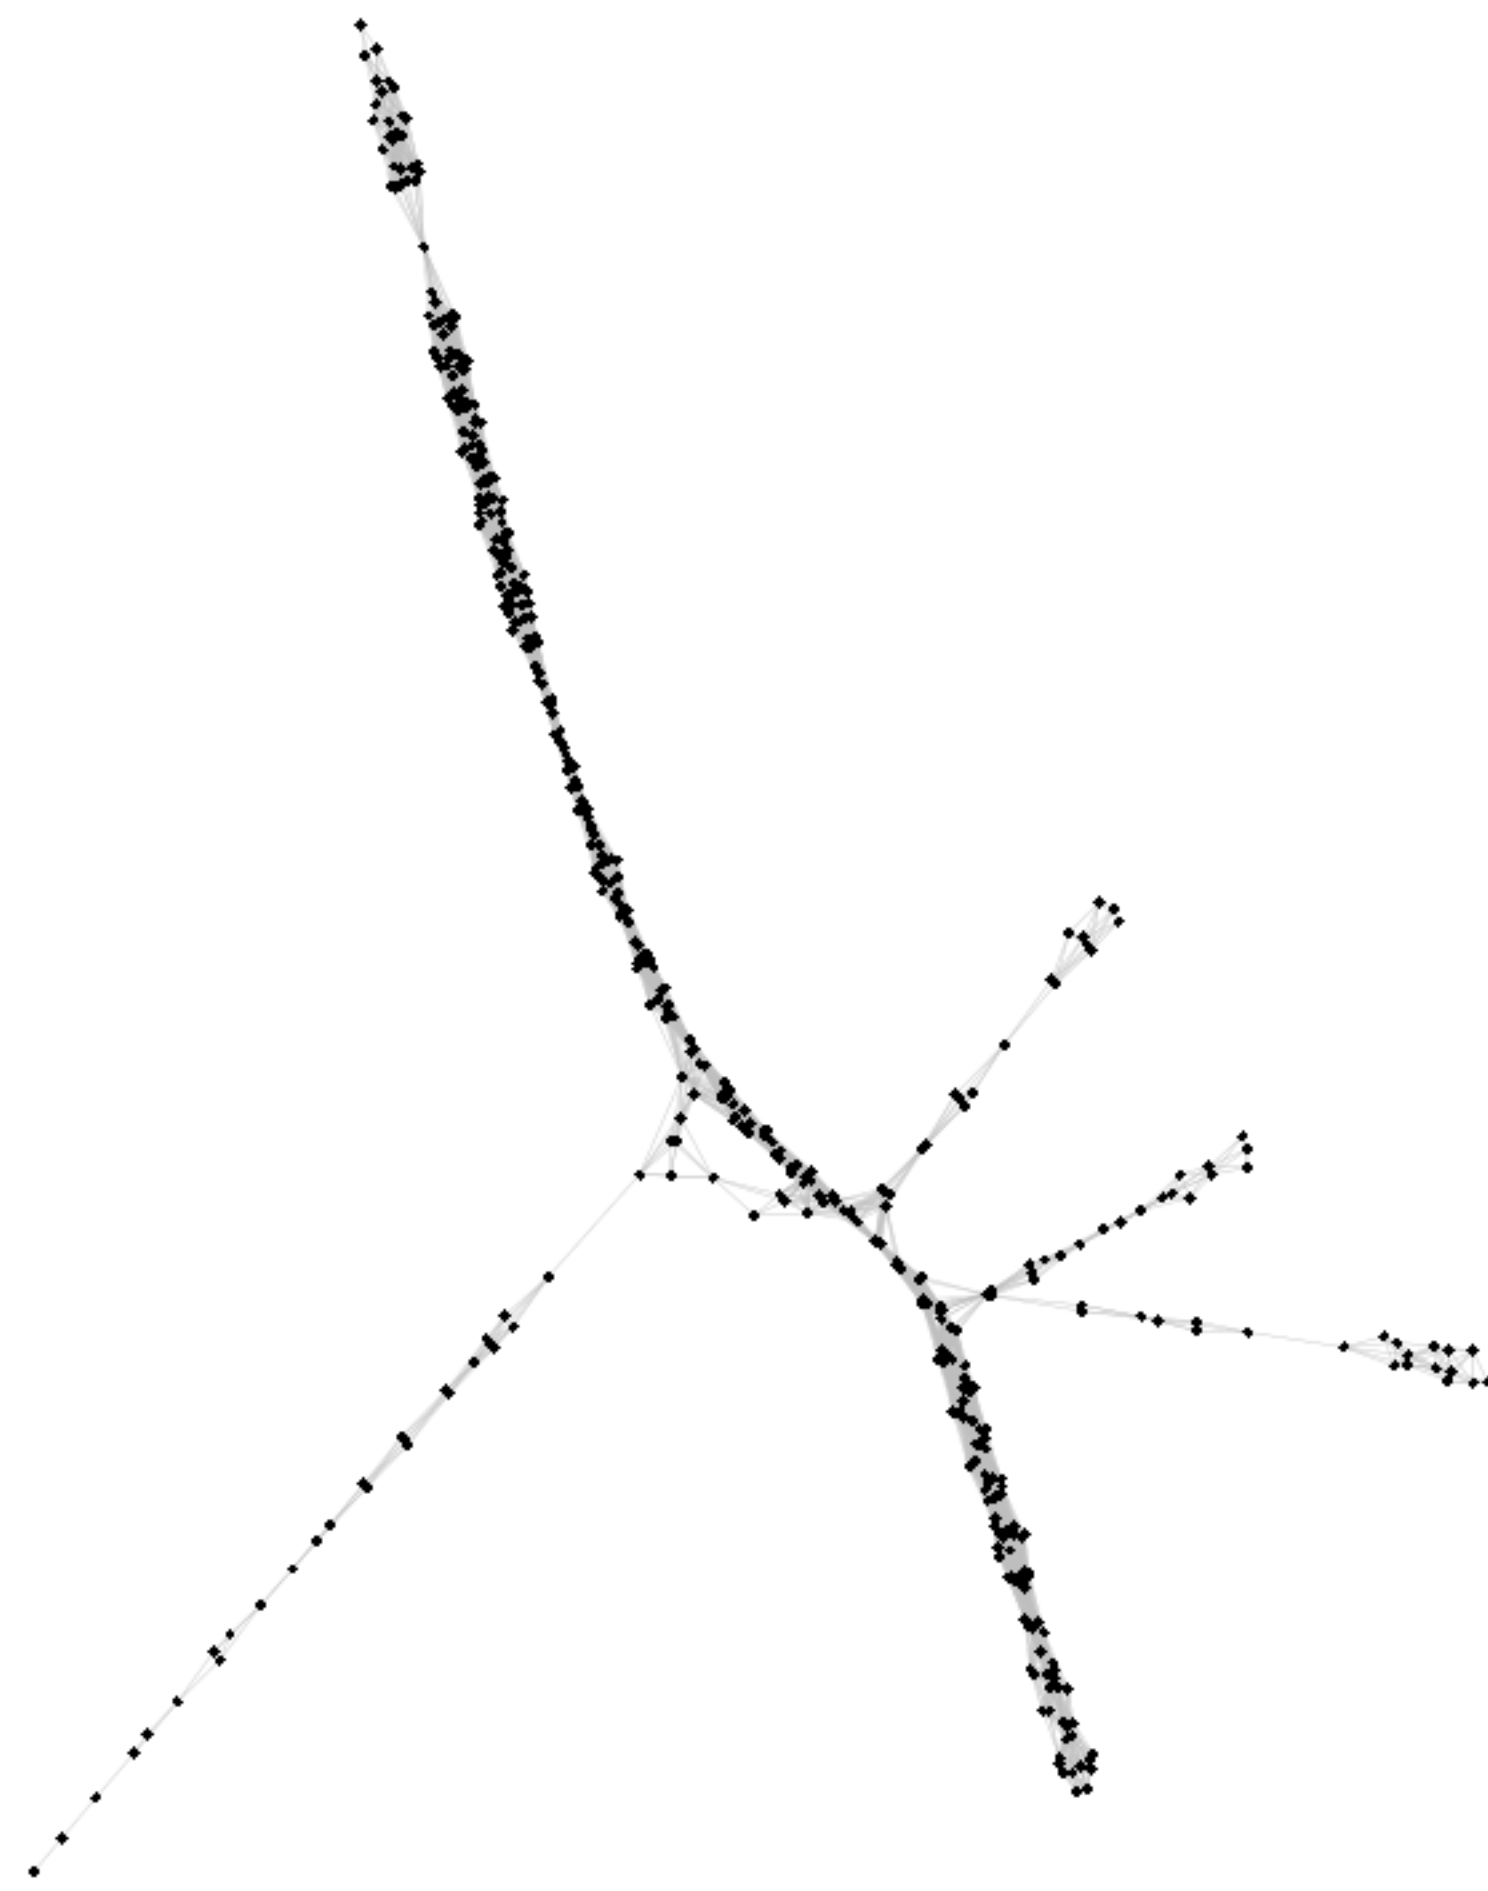

**CL159**

Number of reads: 455  
 Number of pairs: 5031  
 Density: 0.04871  
 Diameter: NA  
 Mean edge weight: 211.91  
 Max. degree: 41

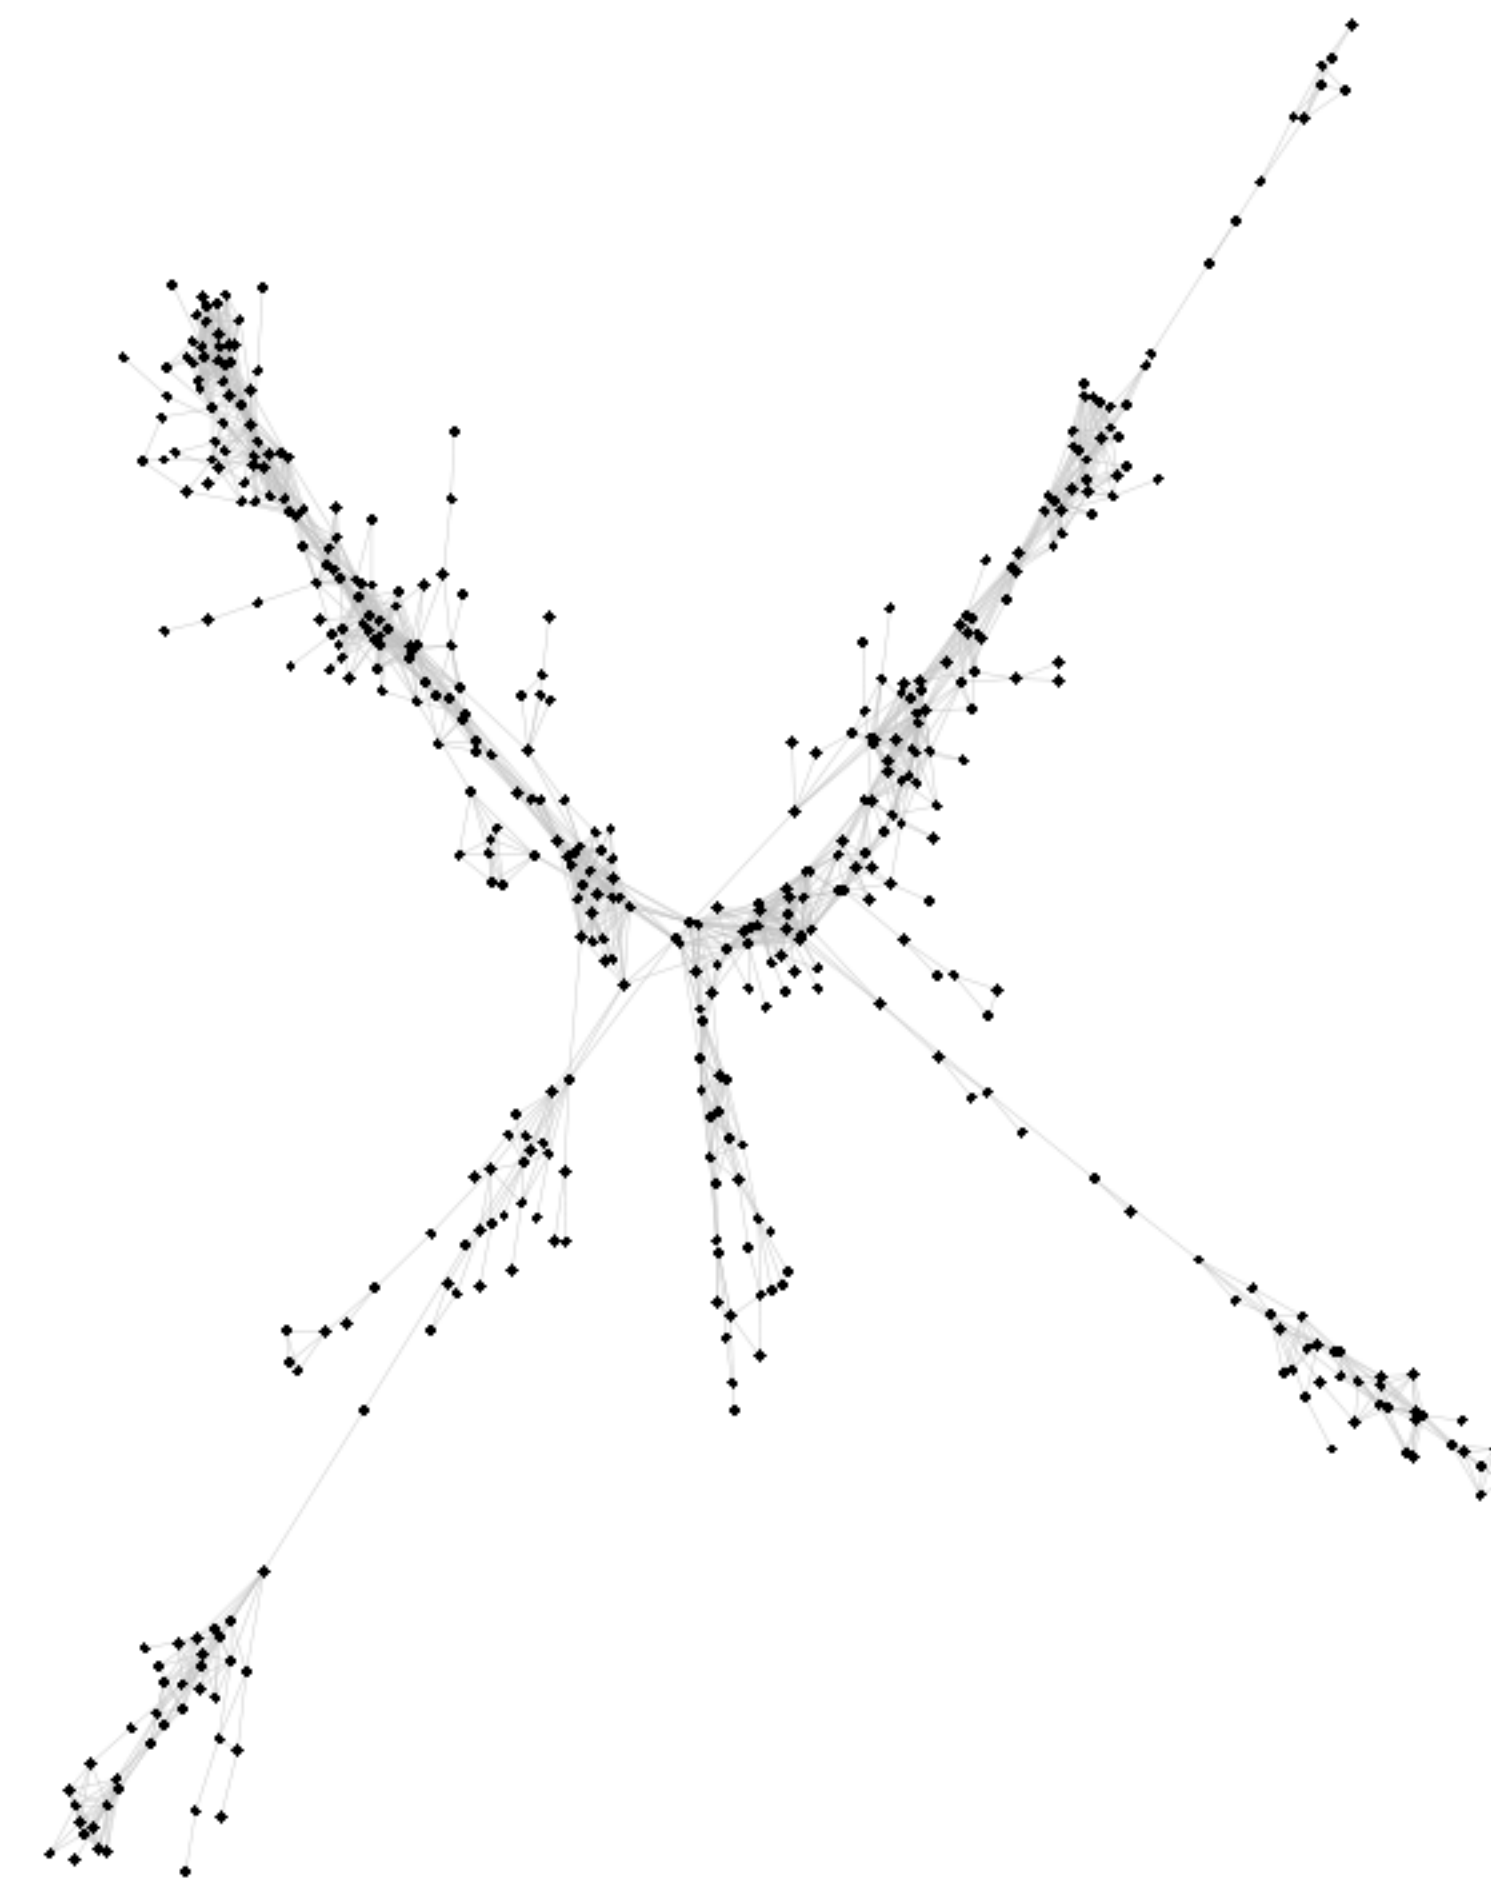

**CL160**

Number of reads: 441  
 Number of pairs: 1799  
 Density: 0.01854  
 Diameter: NA  
 Mean edge weight: 154.83  
 Max. degree: 30

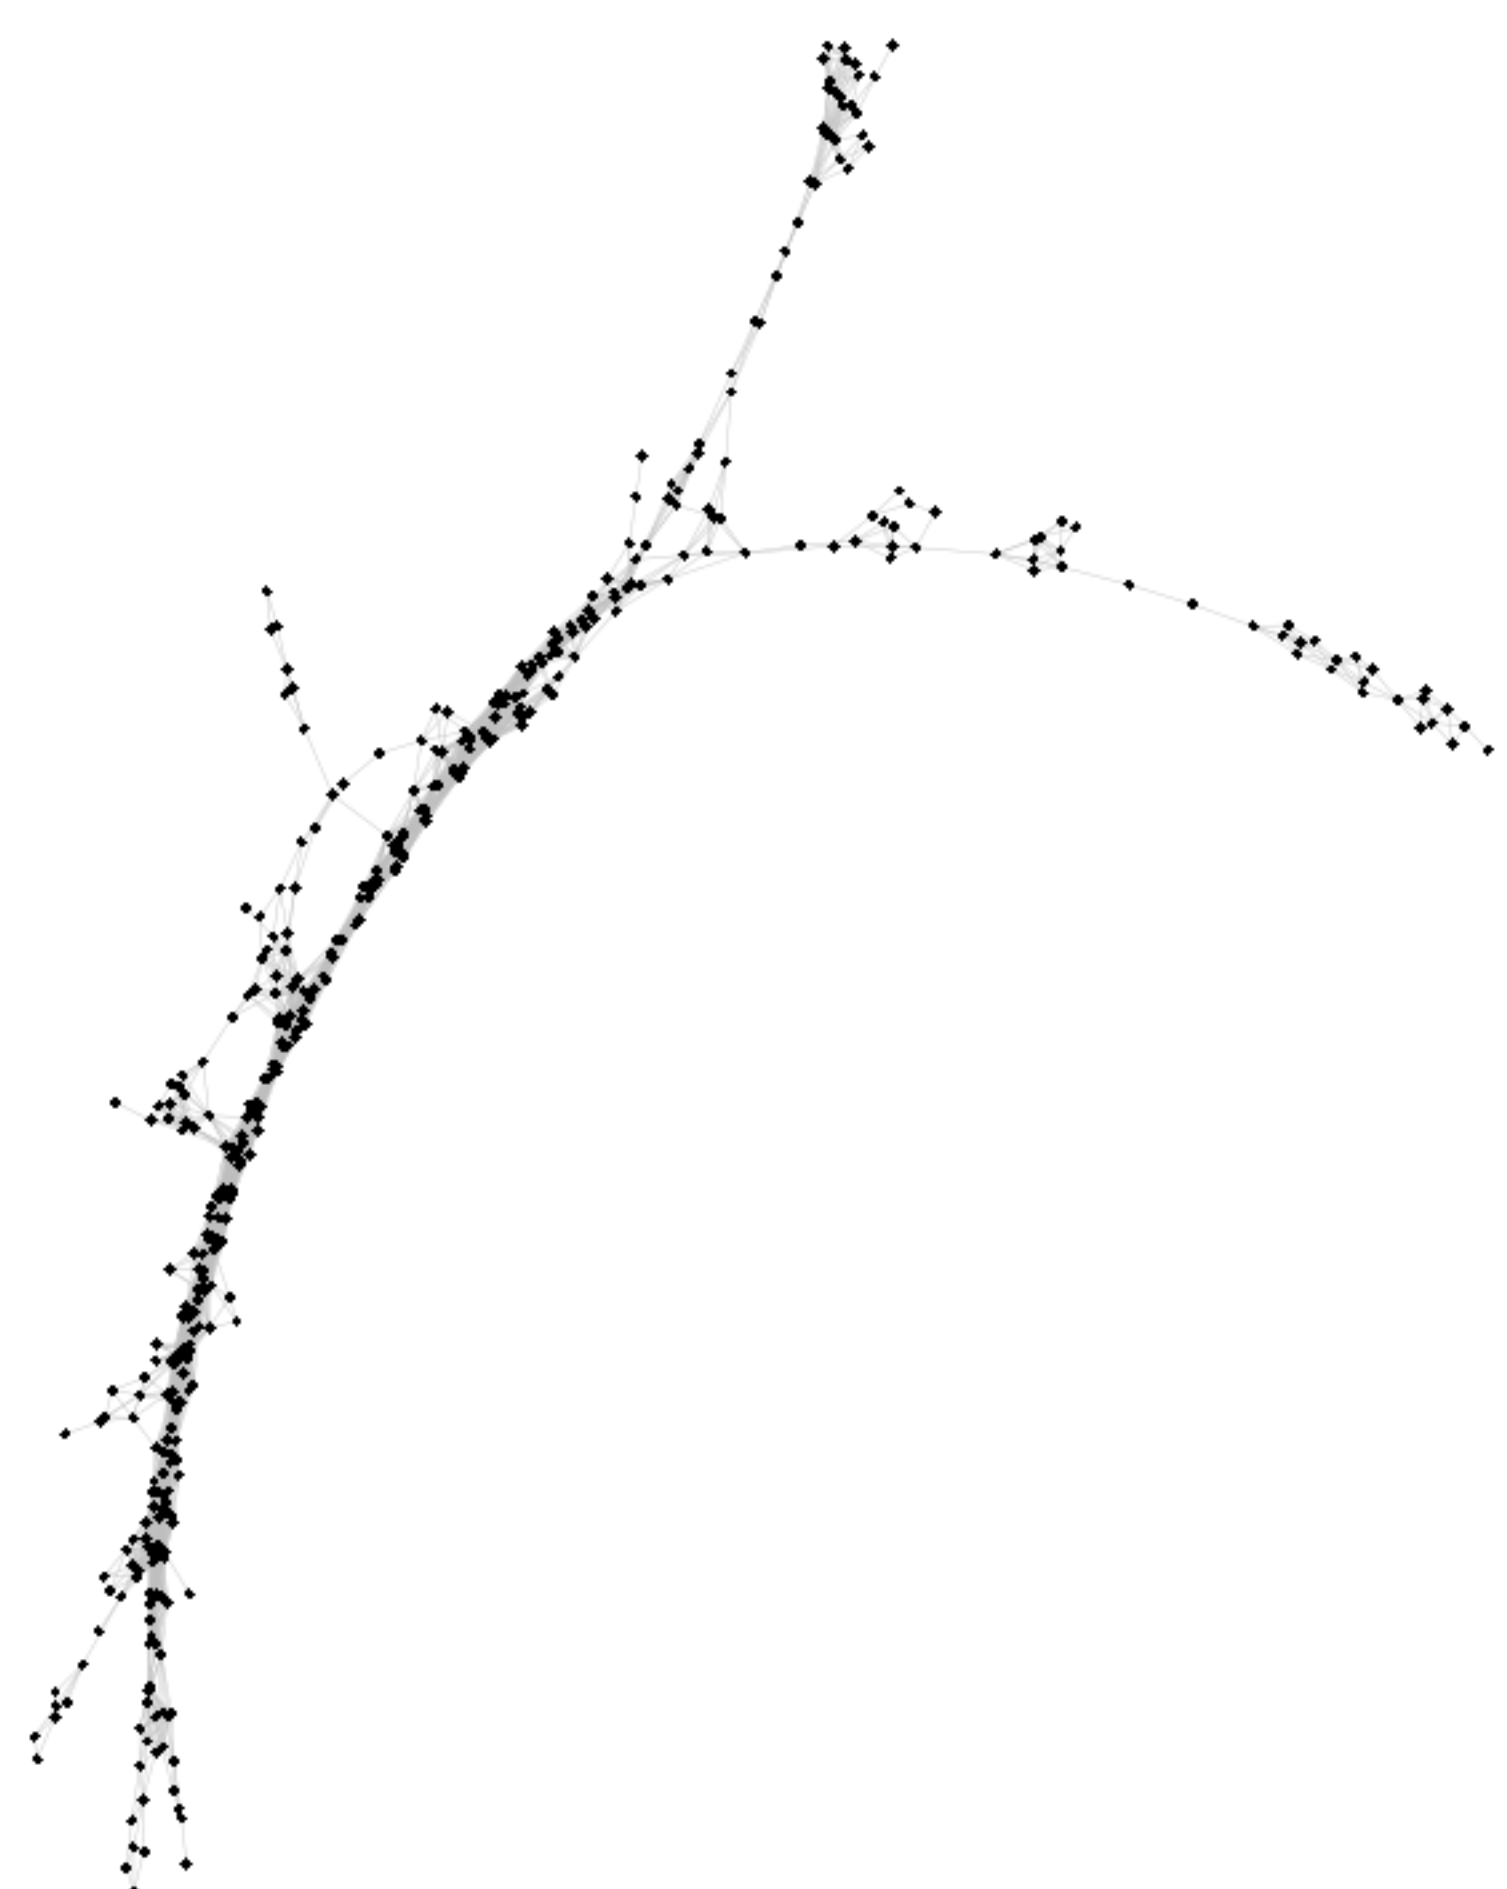

**CL161**

Number of reads: 431  
 Number of pairs: 3294  
 Density: 0.03555  
 Diameter: NA  
 Mean edge weight: 183.29  
 Max. degree: 32

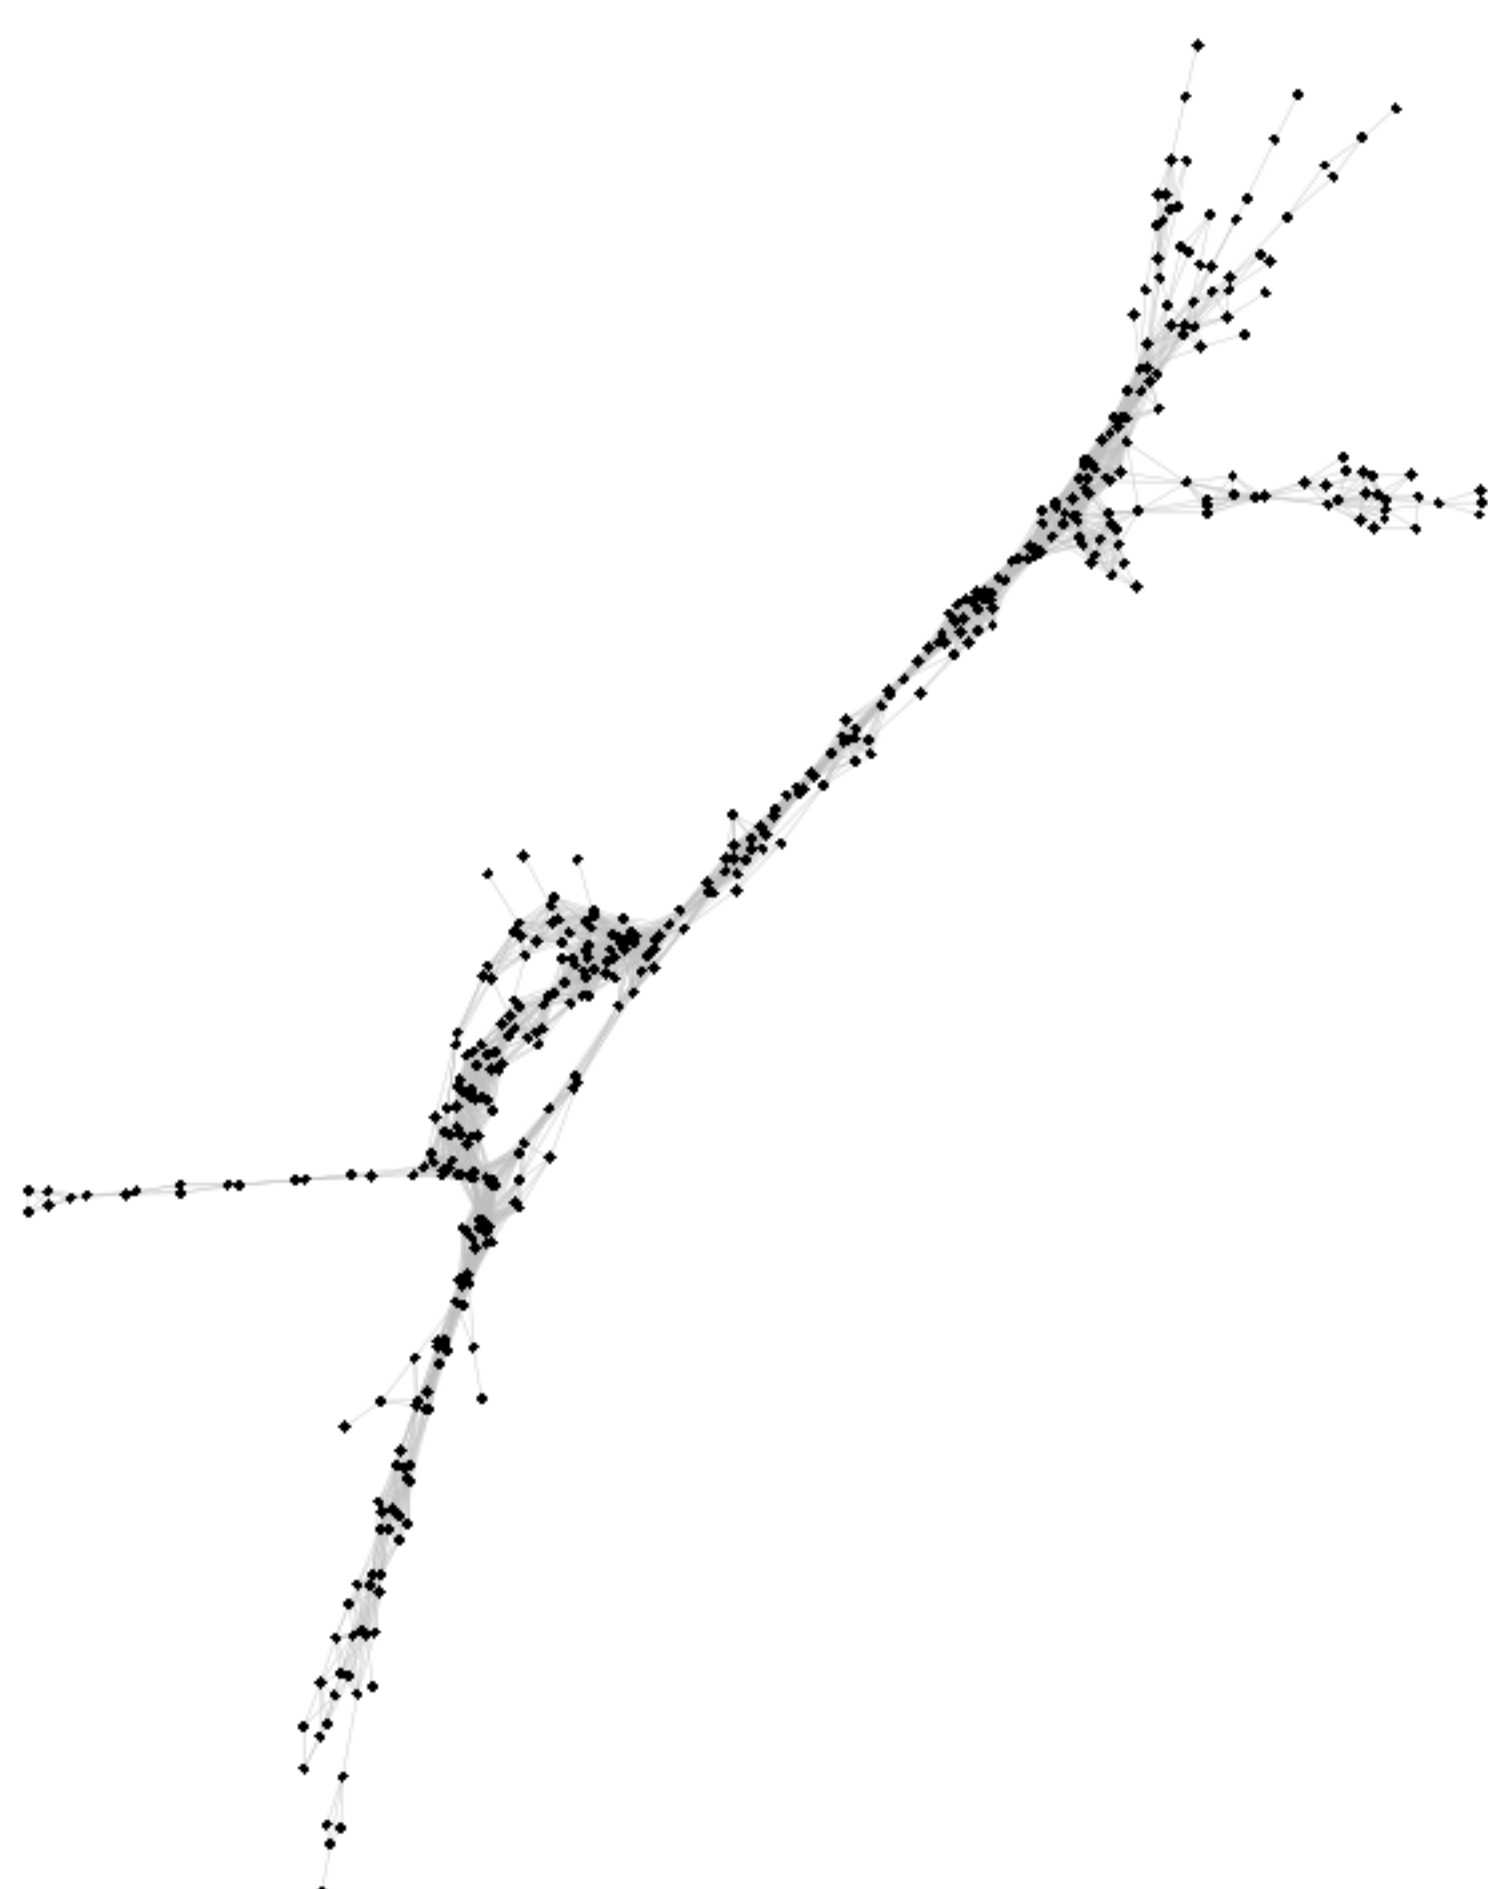

**CL162**

Number of reads: 422  
 Number of pairs: 3201  
 Density: 0.03603  
 Diameter: NA  
 Mean edge weight: 166.48  
 Max. degree: 35

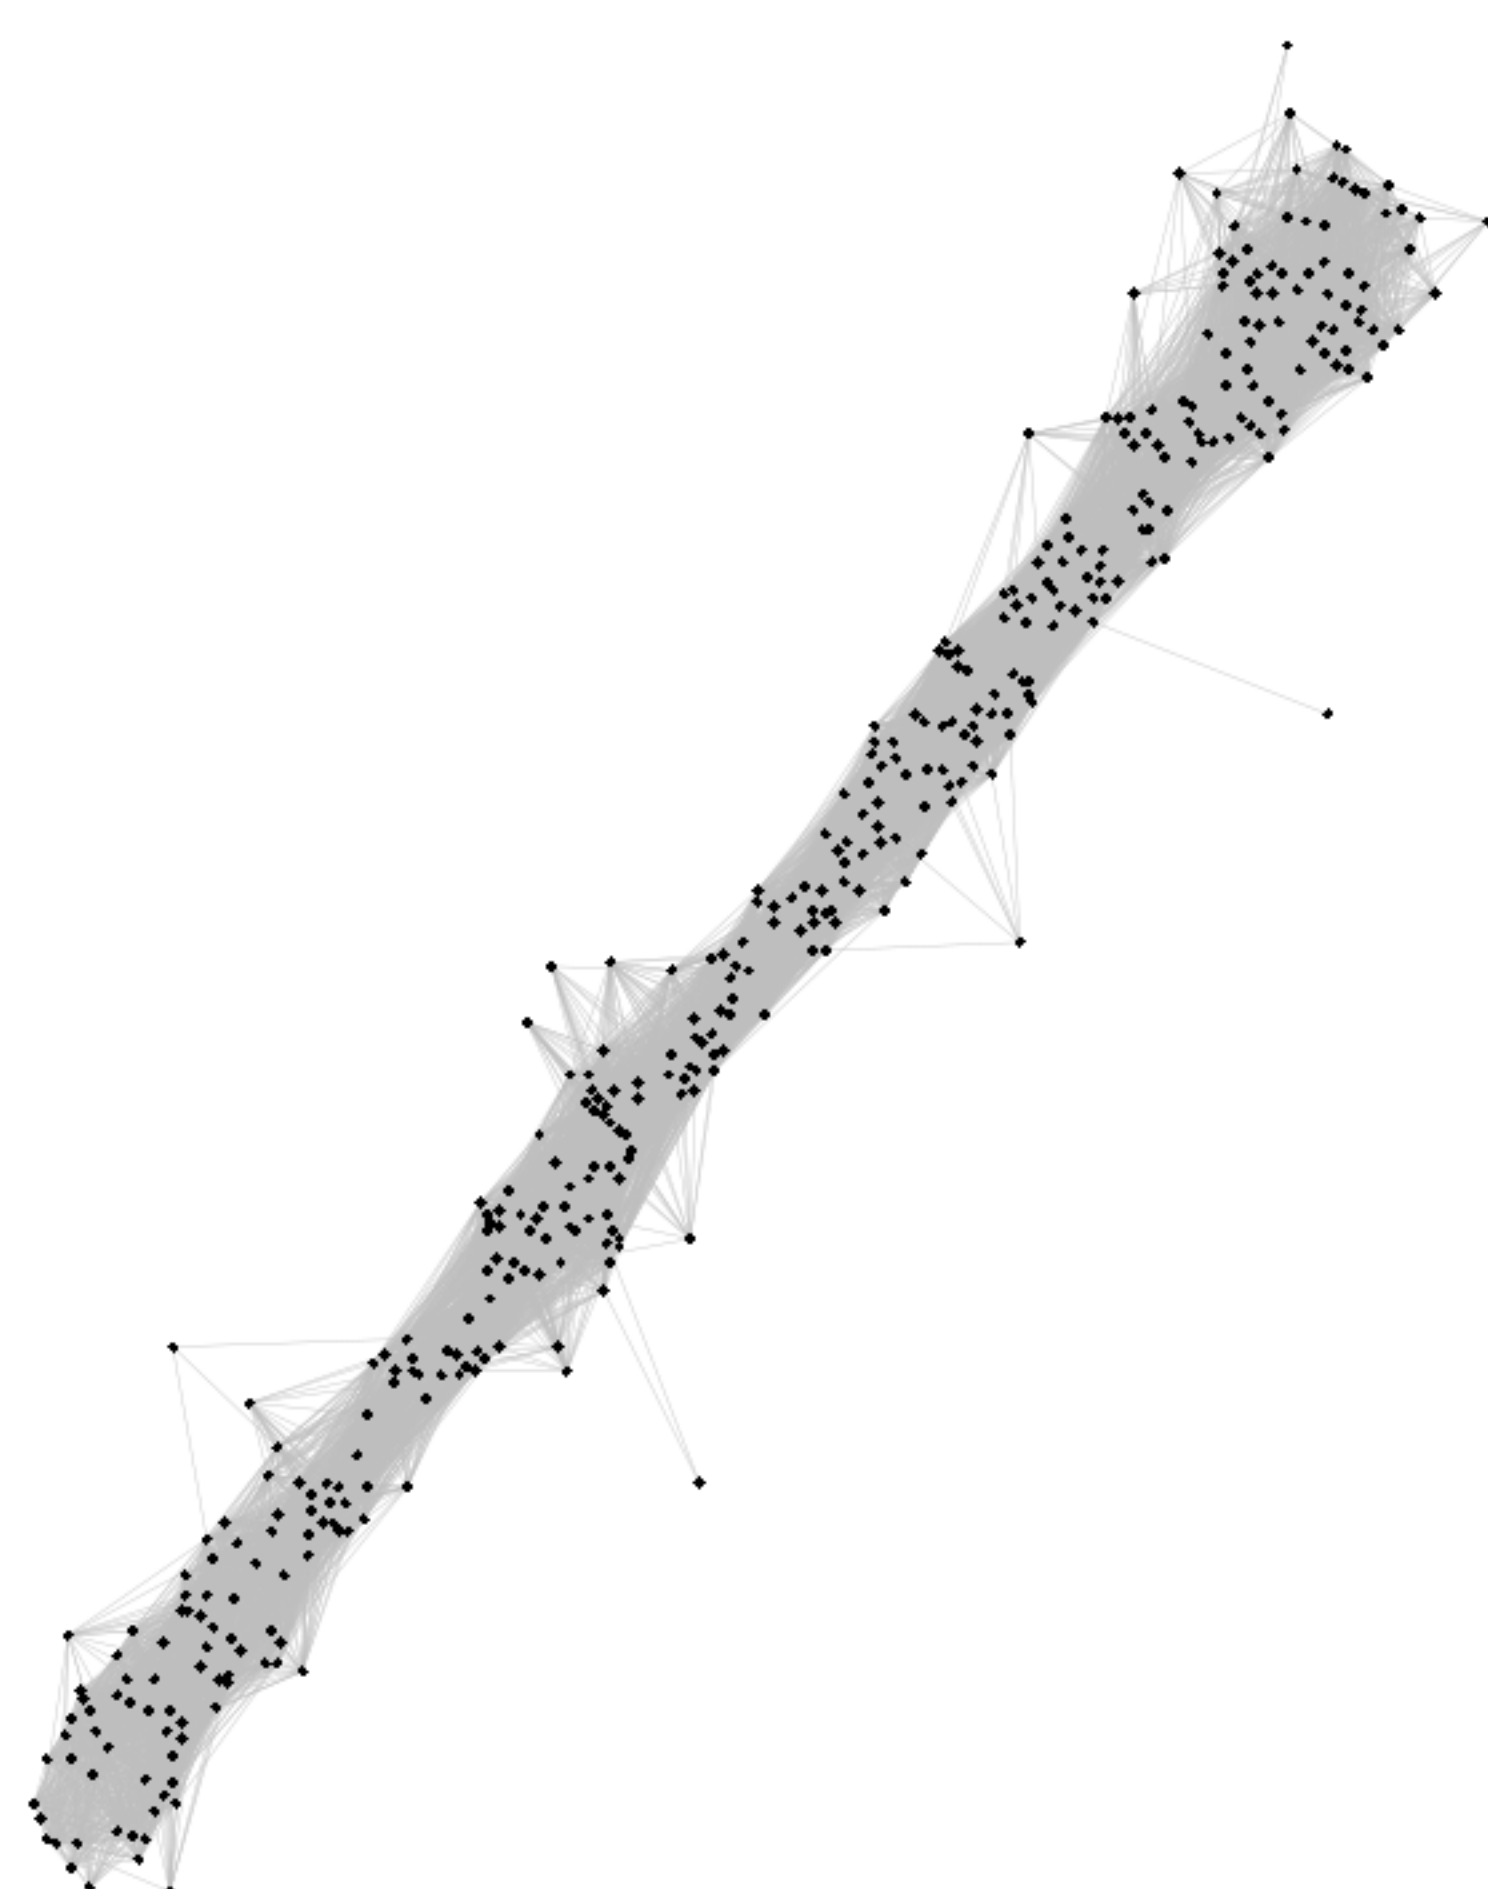

**CL163**

Number of reads: 392  
 Number of pairs: 12261  
 Density: 0.16  
 Diameter: NA  
 Mean edge weight: 166.42  
 Max. degree: 84

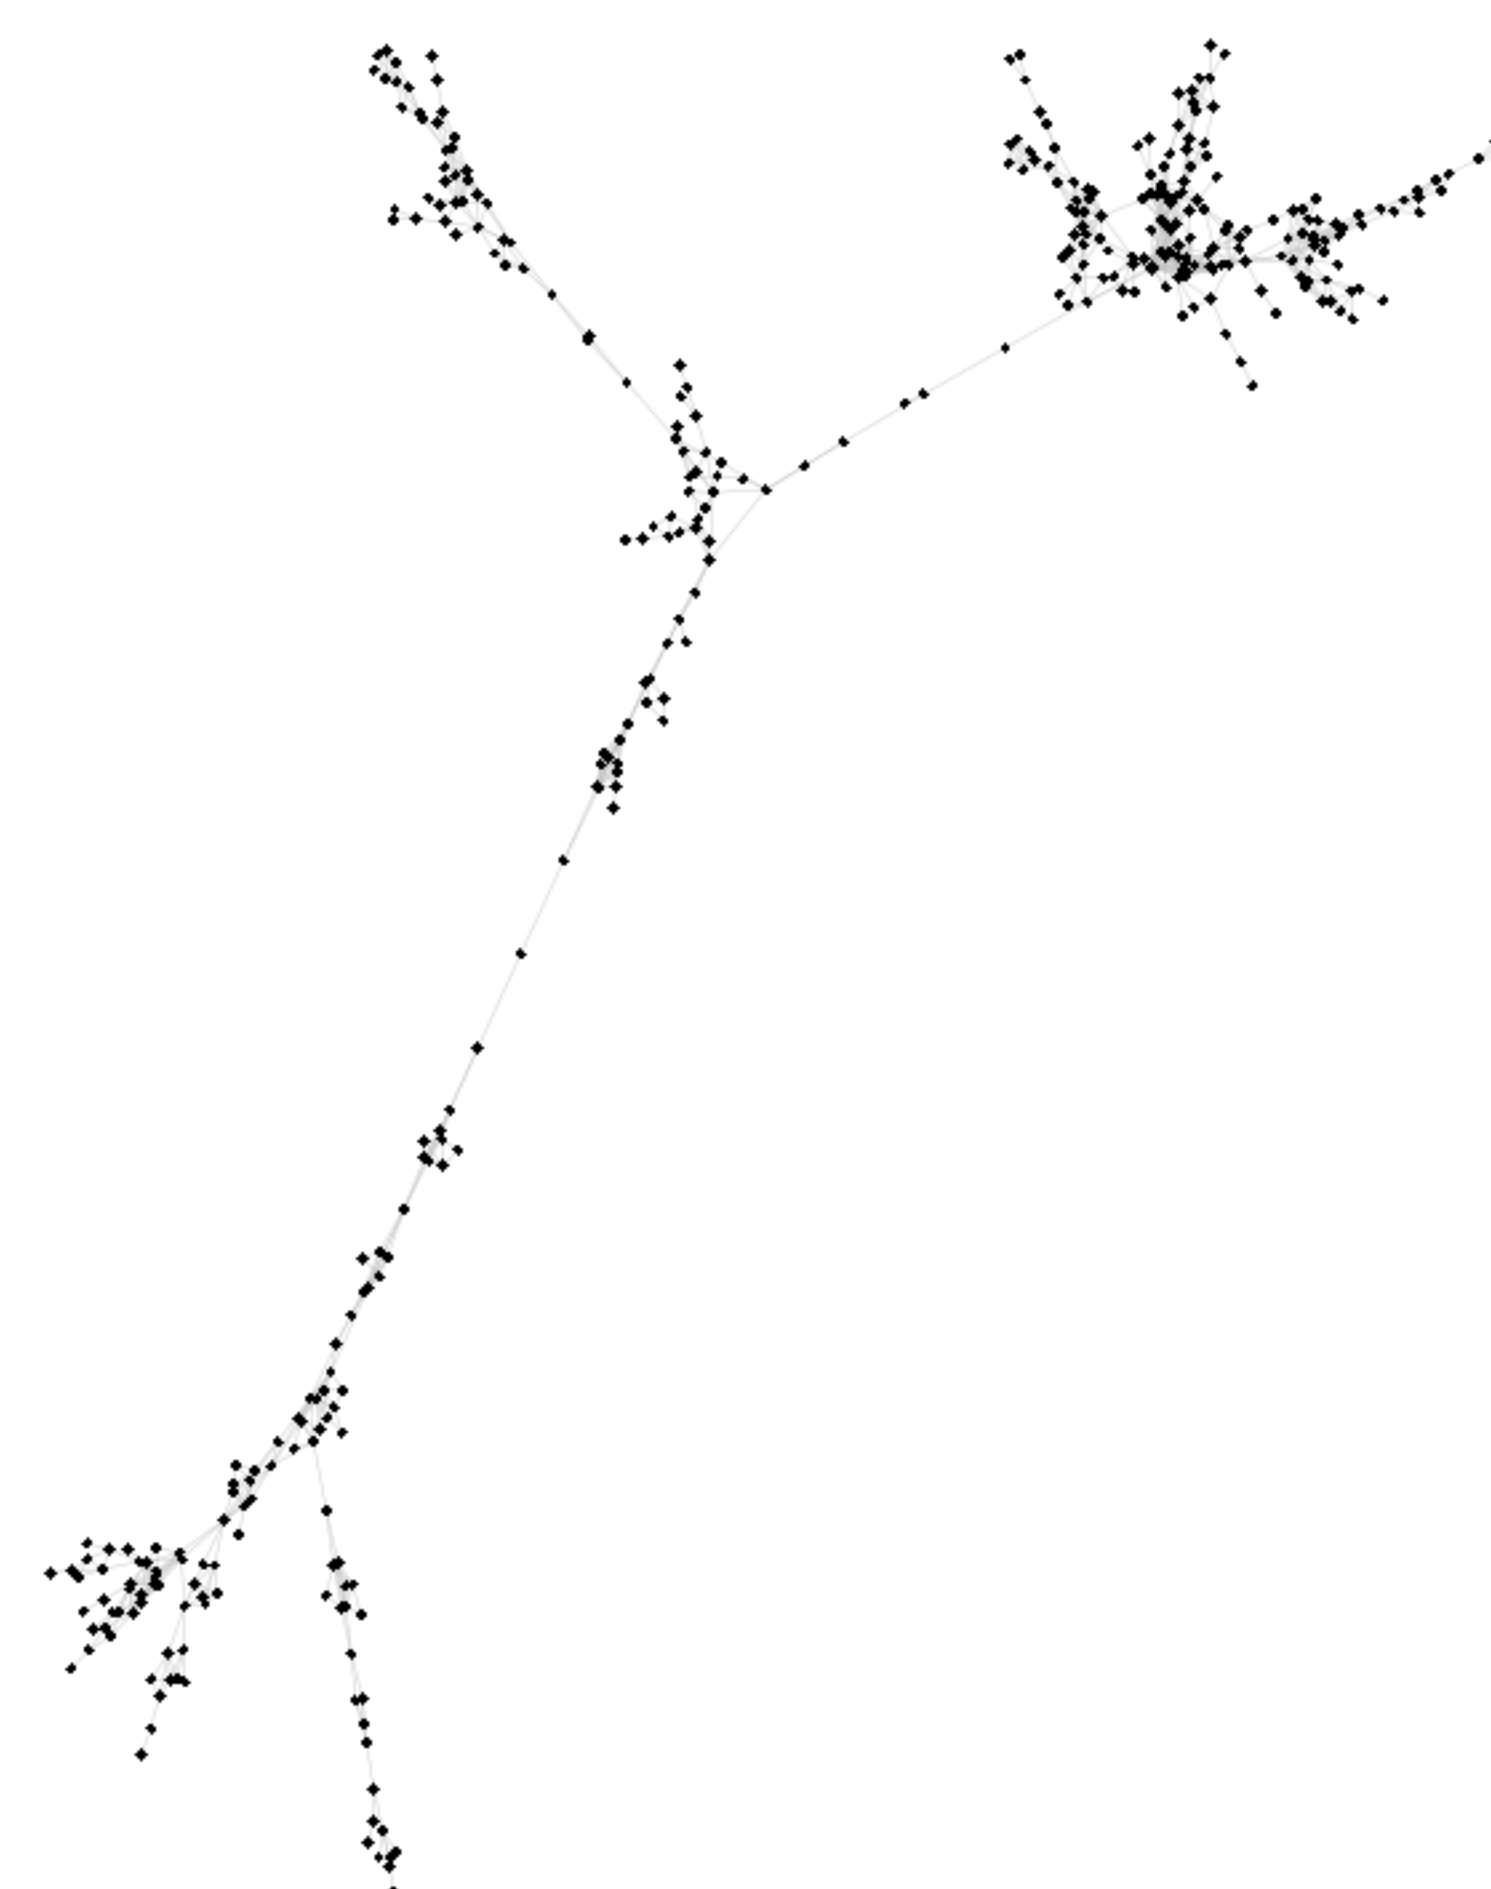

**CL164**

Number of reads: 373  
 Number of pairs: 1016  
 Density: 0.01464  
 Diameter: NA  
 Mean edge weight: 161.3  
 Max. degree: 20

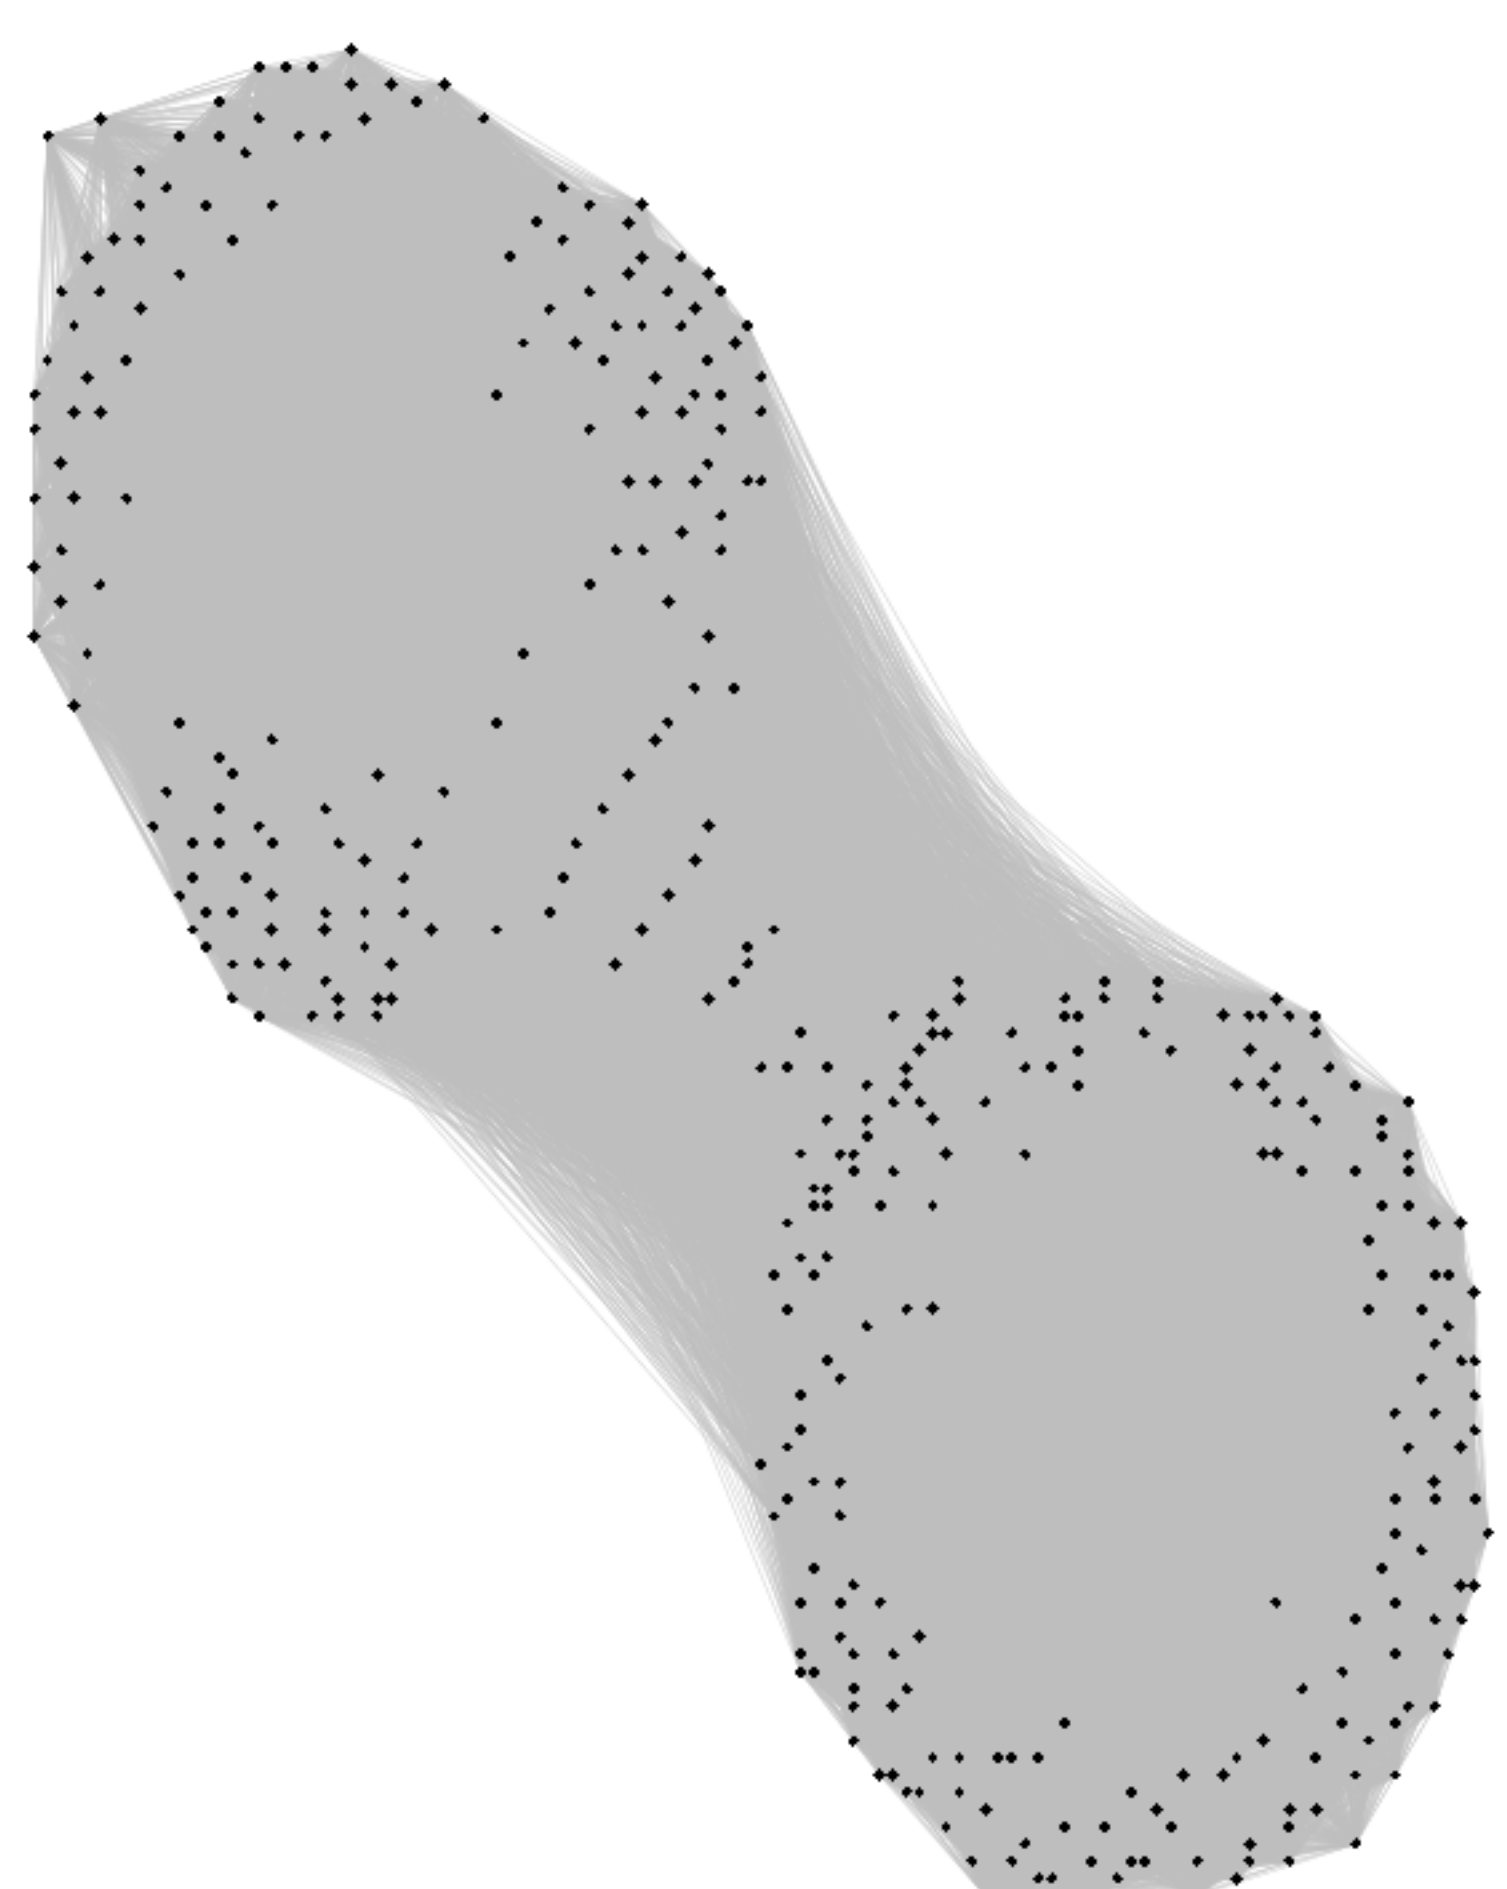

**CL165**

Number of reads: 372  
 Number of pairs: 42177  
 Density: 0.6112  
 Diameter: NA  
 Mean edge weight: 224.38  
 Max. degree: 343

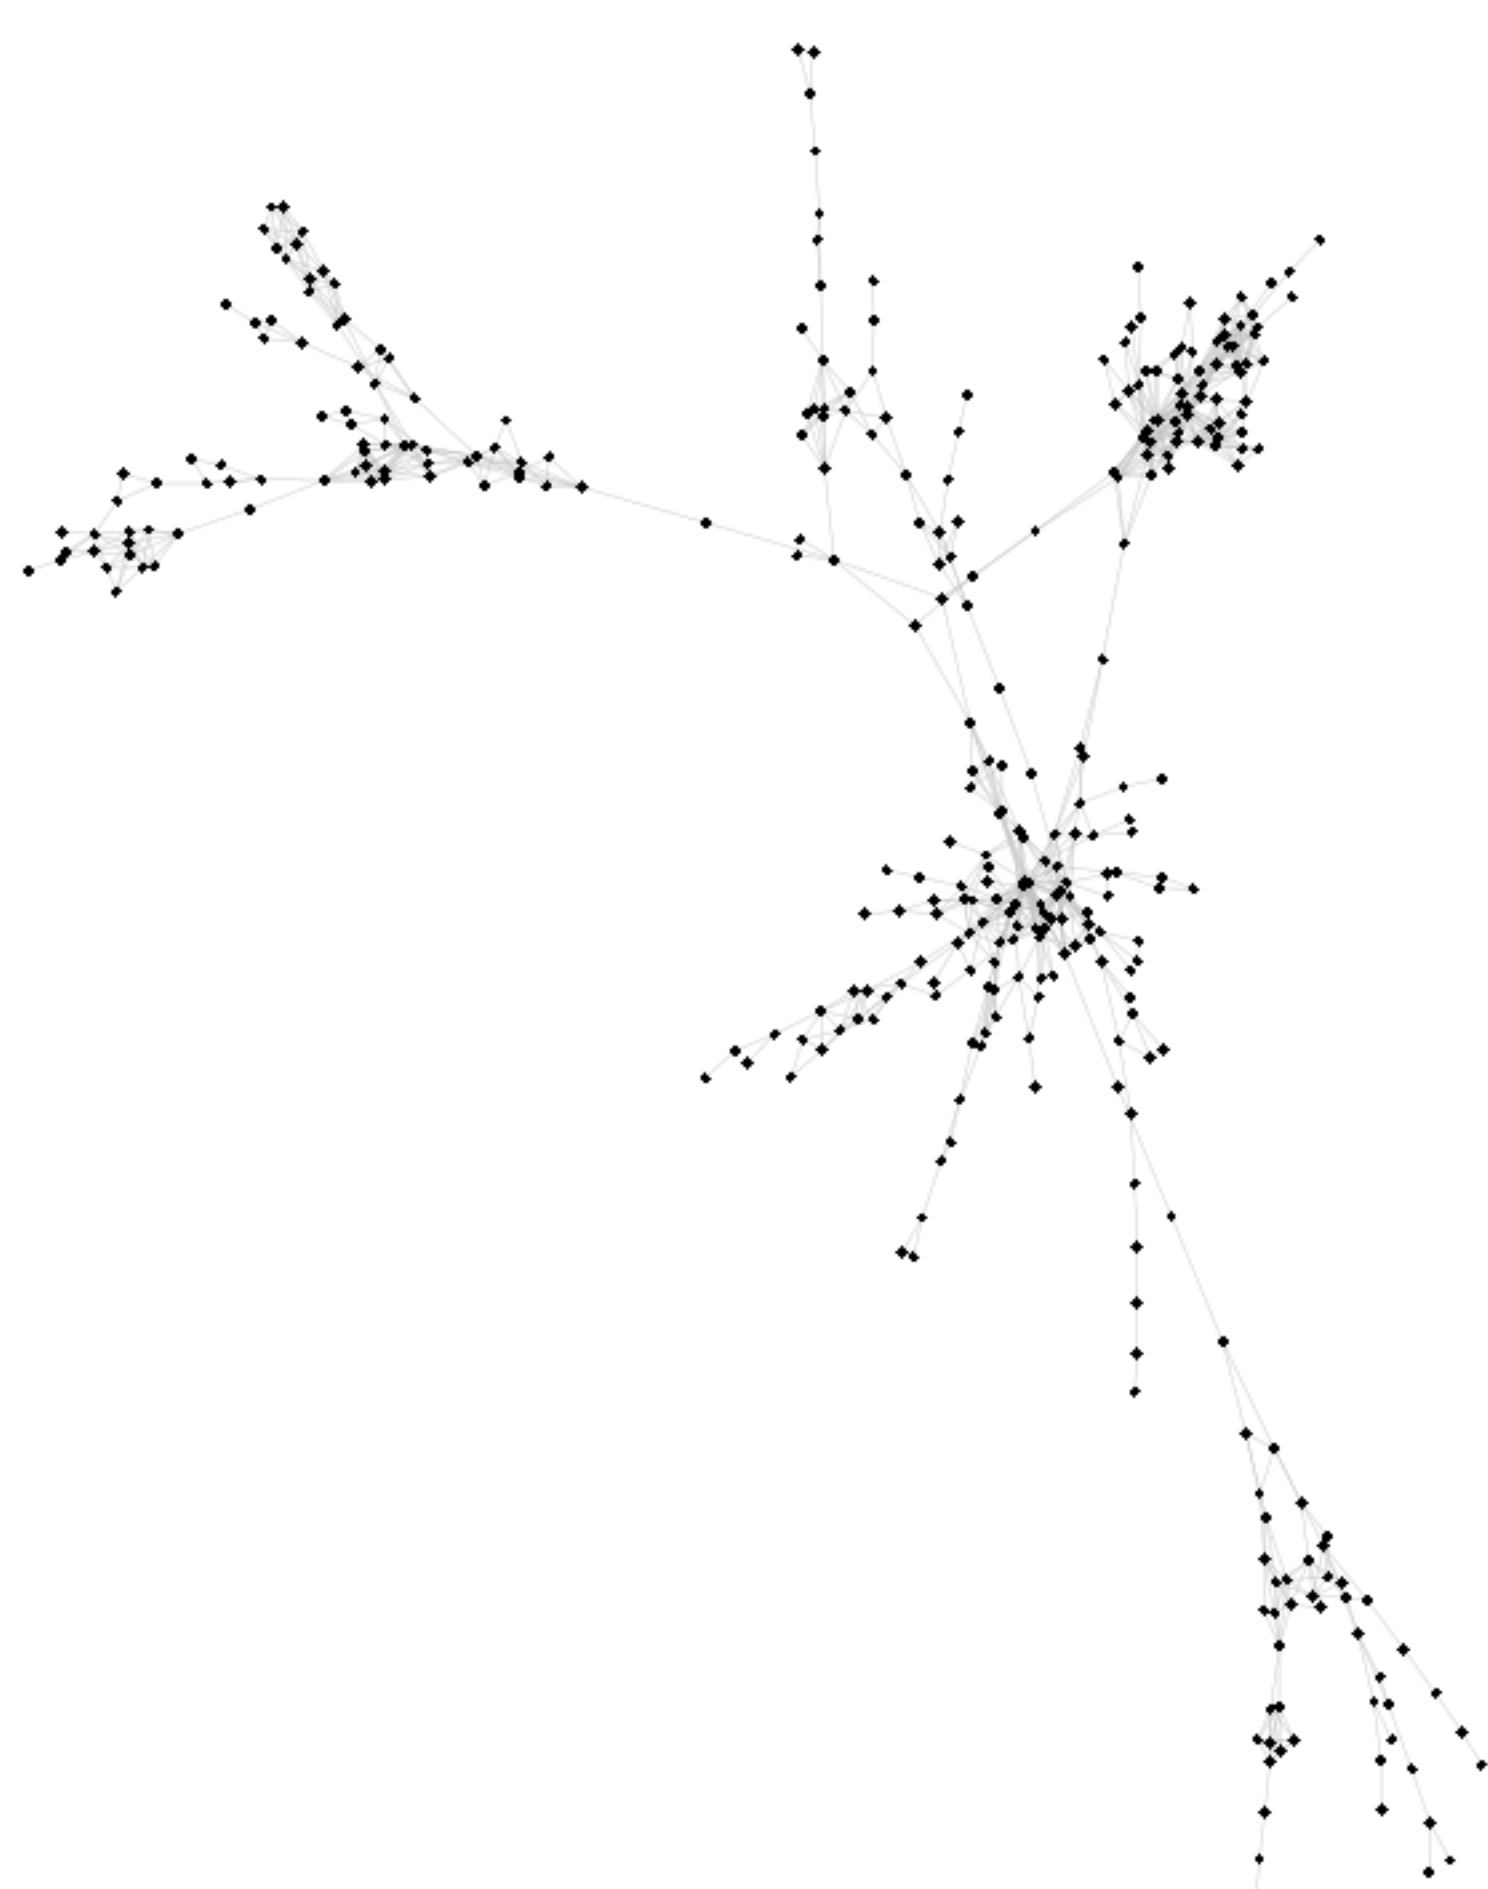

**CL166**

Number of reads: 358  
 Number of pairs: 1051  
 Density: 0.01645  
 Diameter: NA  
 Mean edge weight: 157.02  
 Max. degree: 24

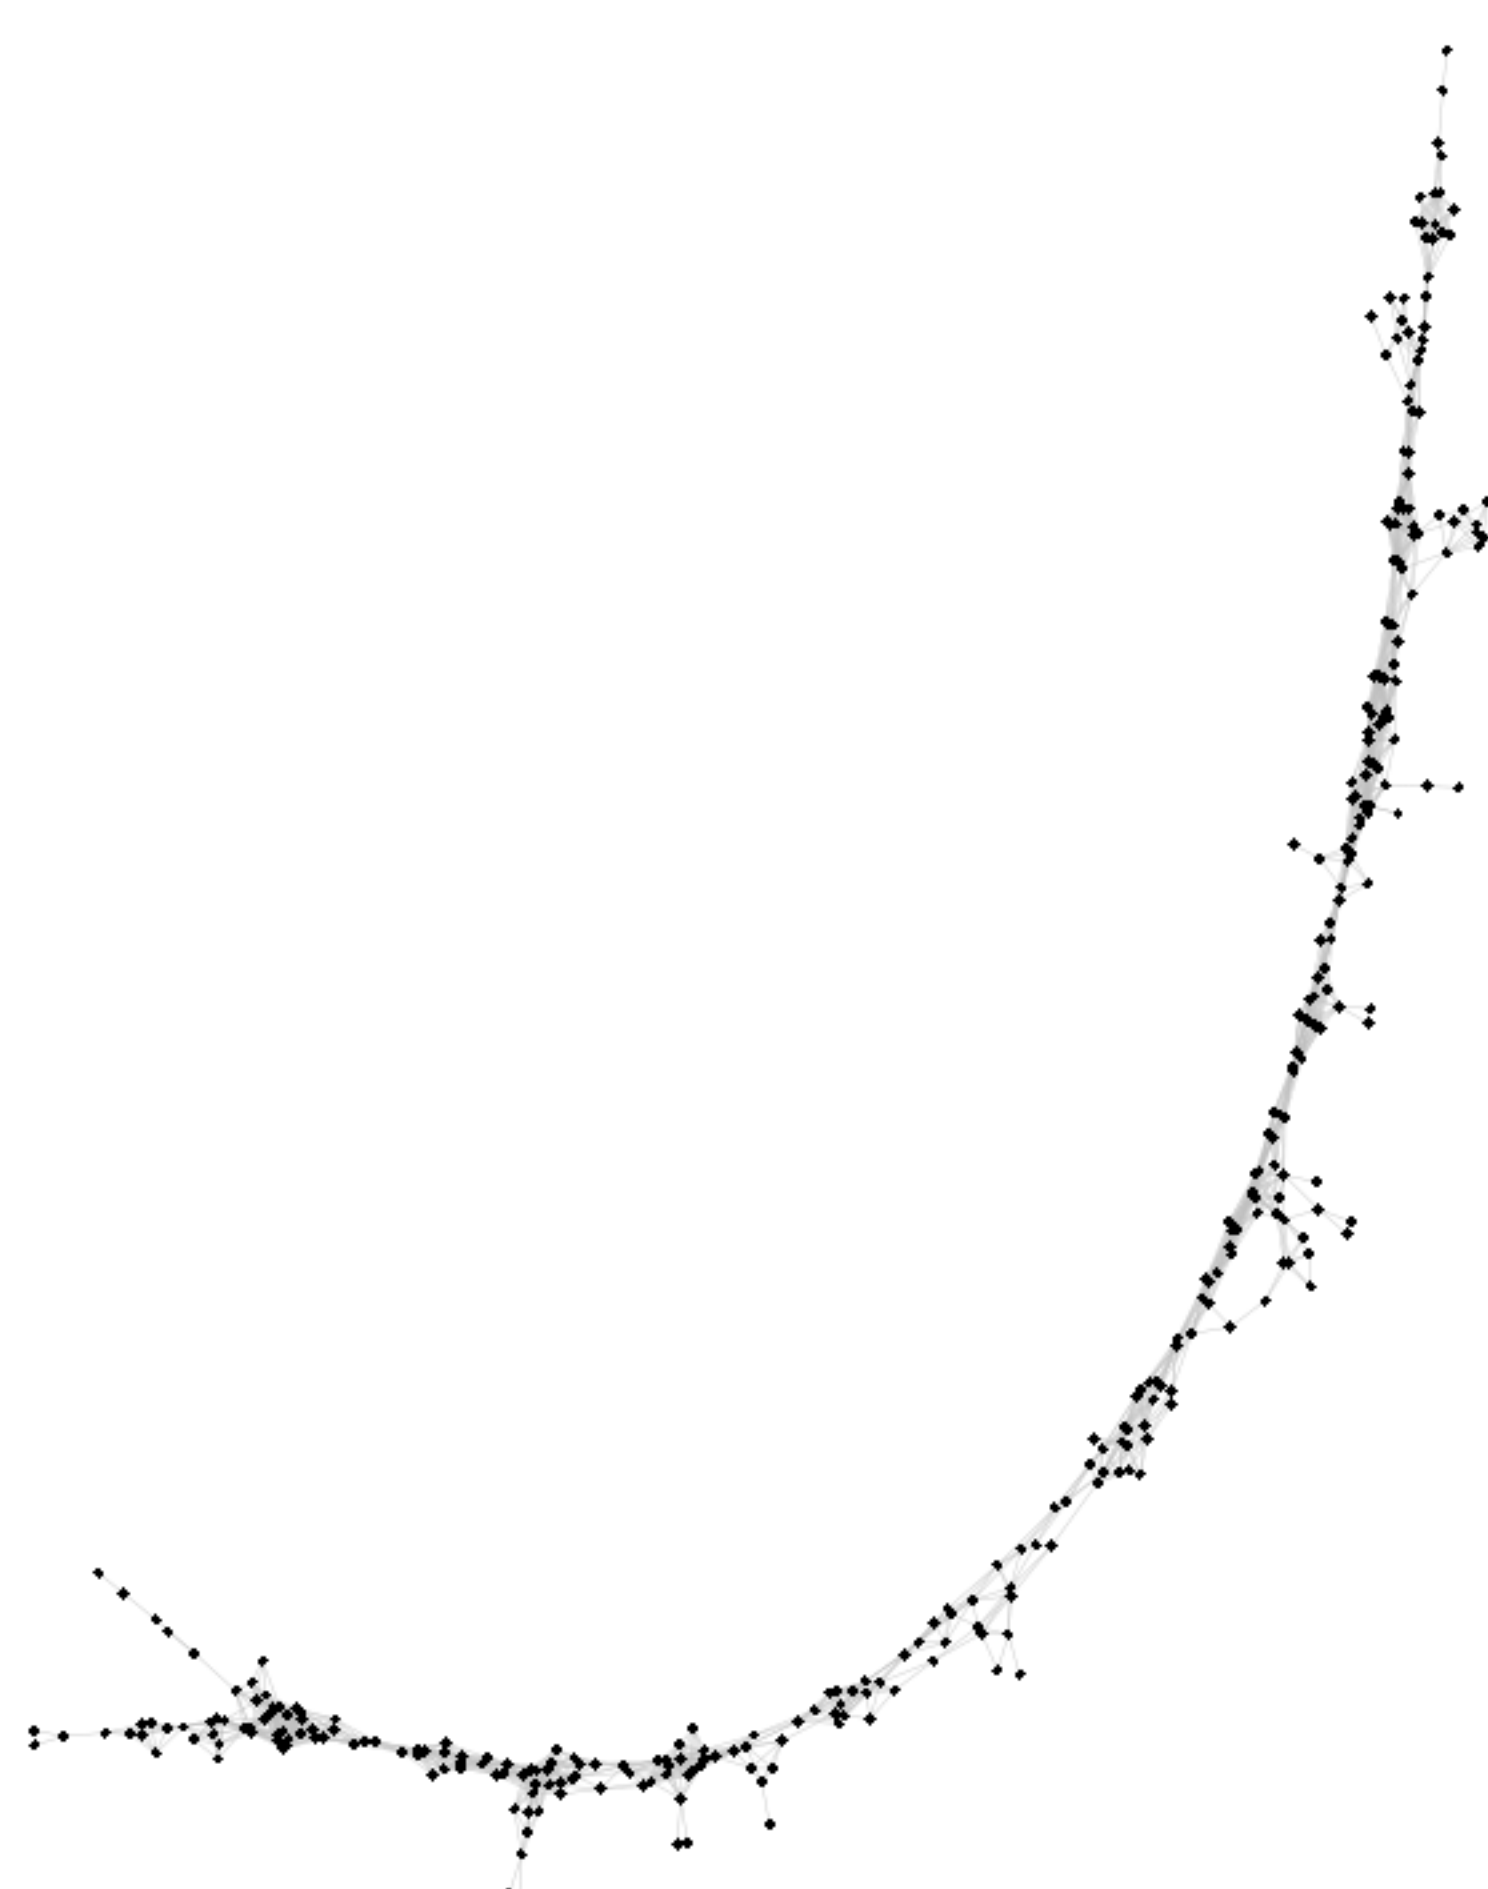

**CL167**

Number of reads: 342  
 Number of pairs: 1835  
 Density: 0.03147  
 Diameter: NA  
 Mean edge weight: 184.75  
 Max. degree: 23

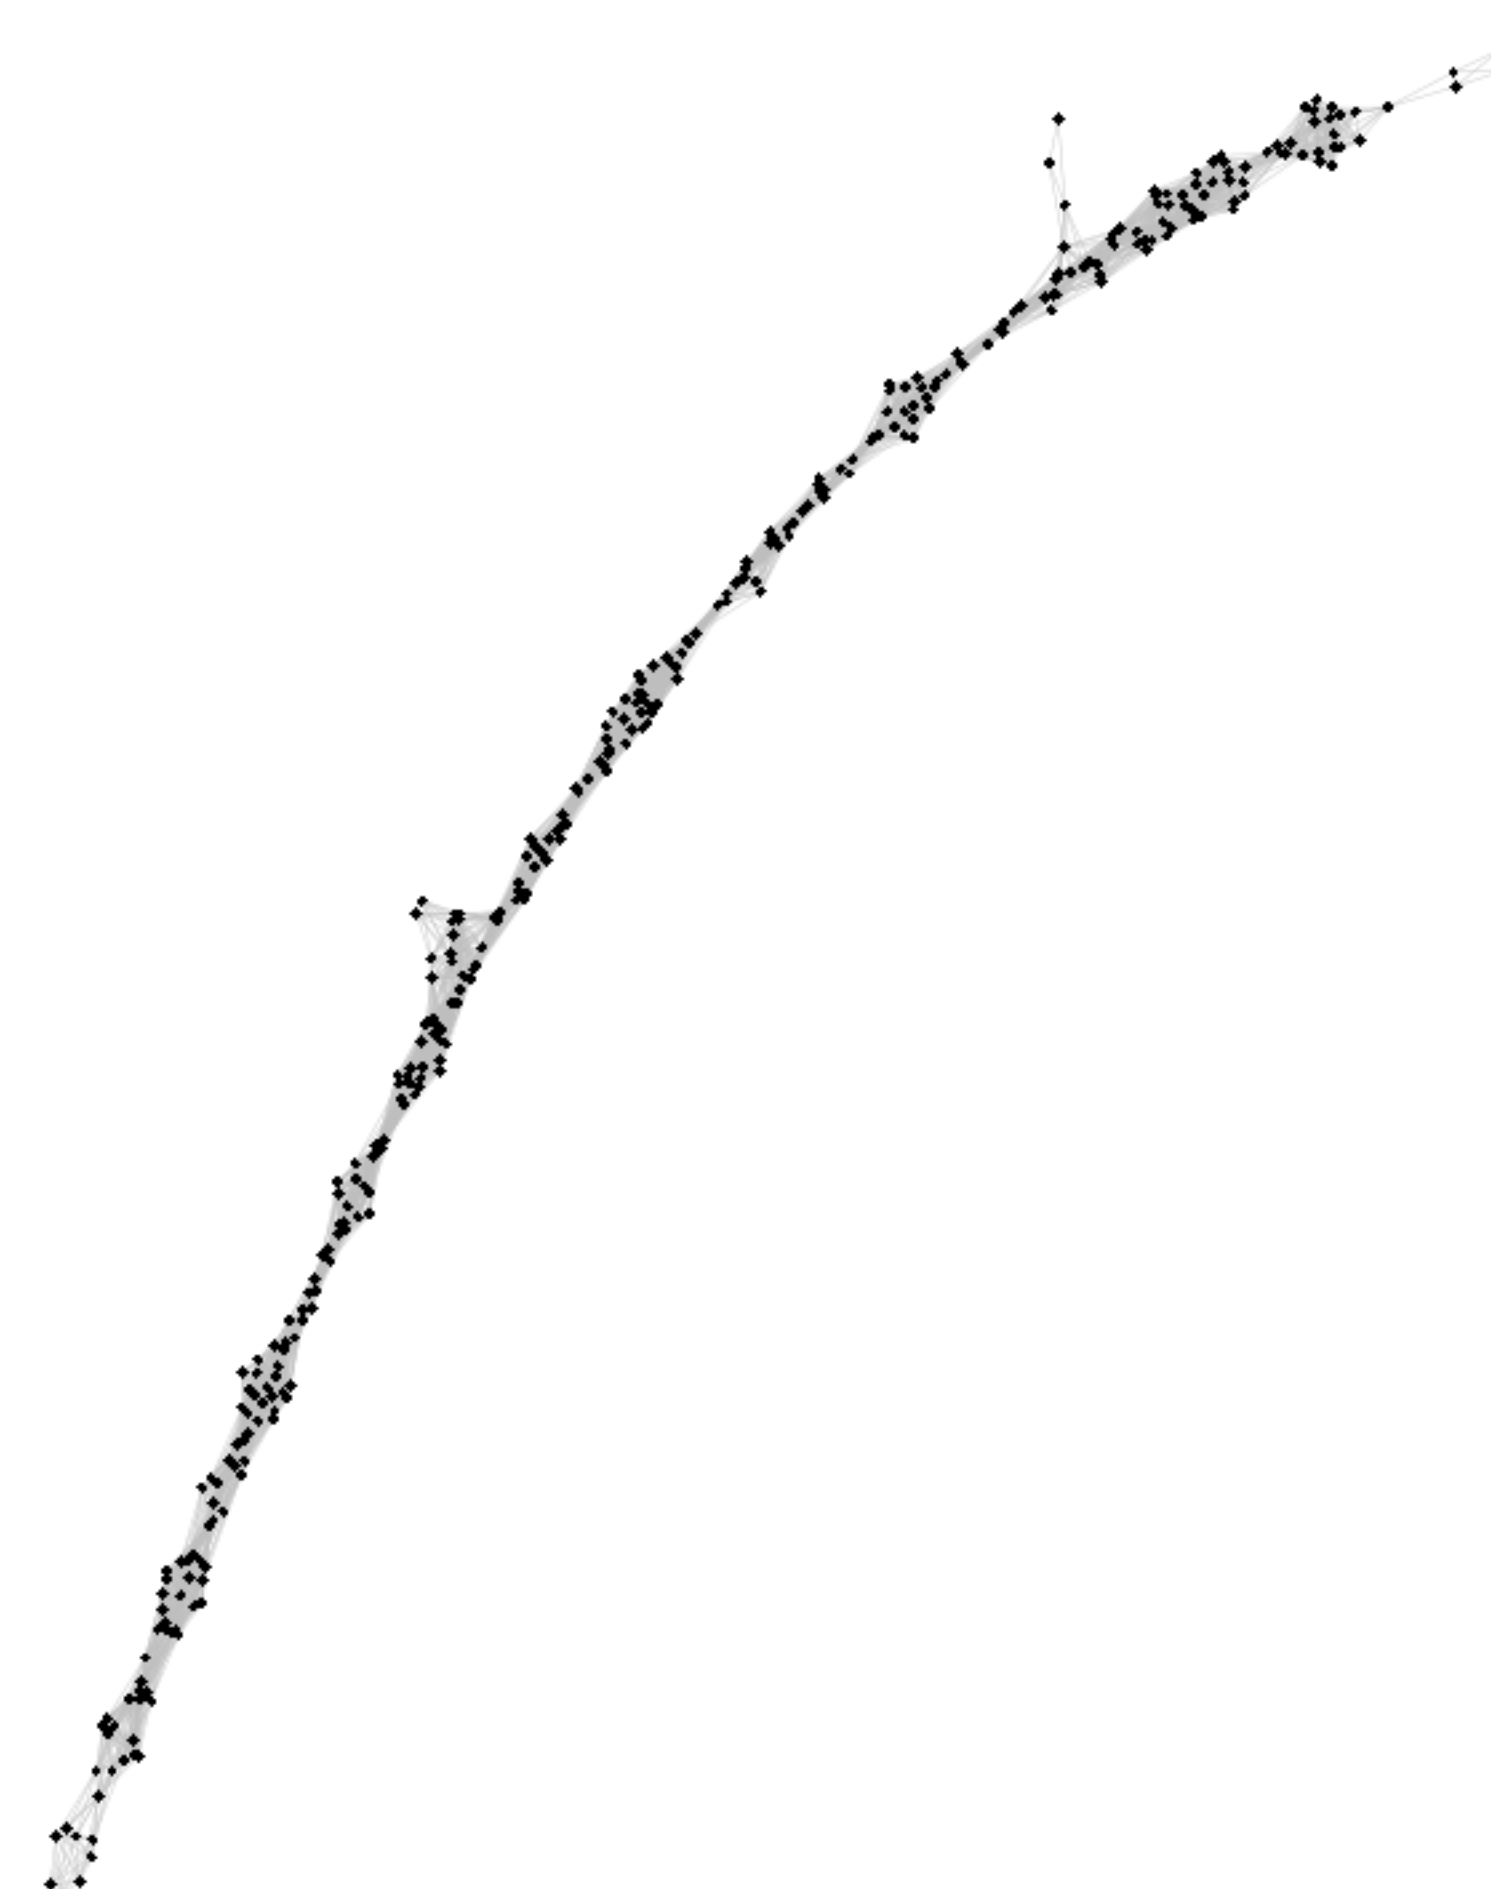

**CL168**

Number of reads: 340  
 Number of pairs: 3862  
 Density: 0.06701  
 Diameter: NA  
 Mean edge weight: 214.66  
 Max. degree: 34

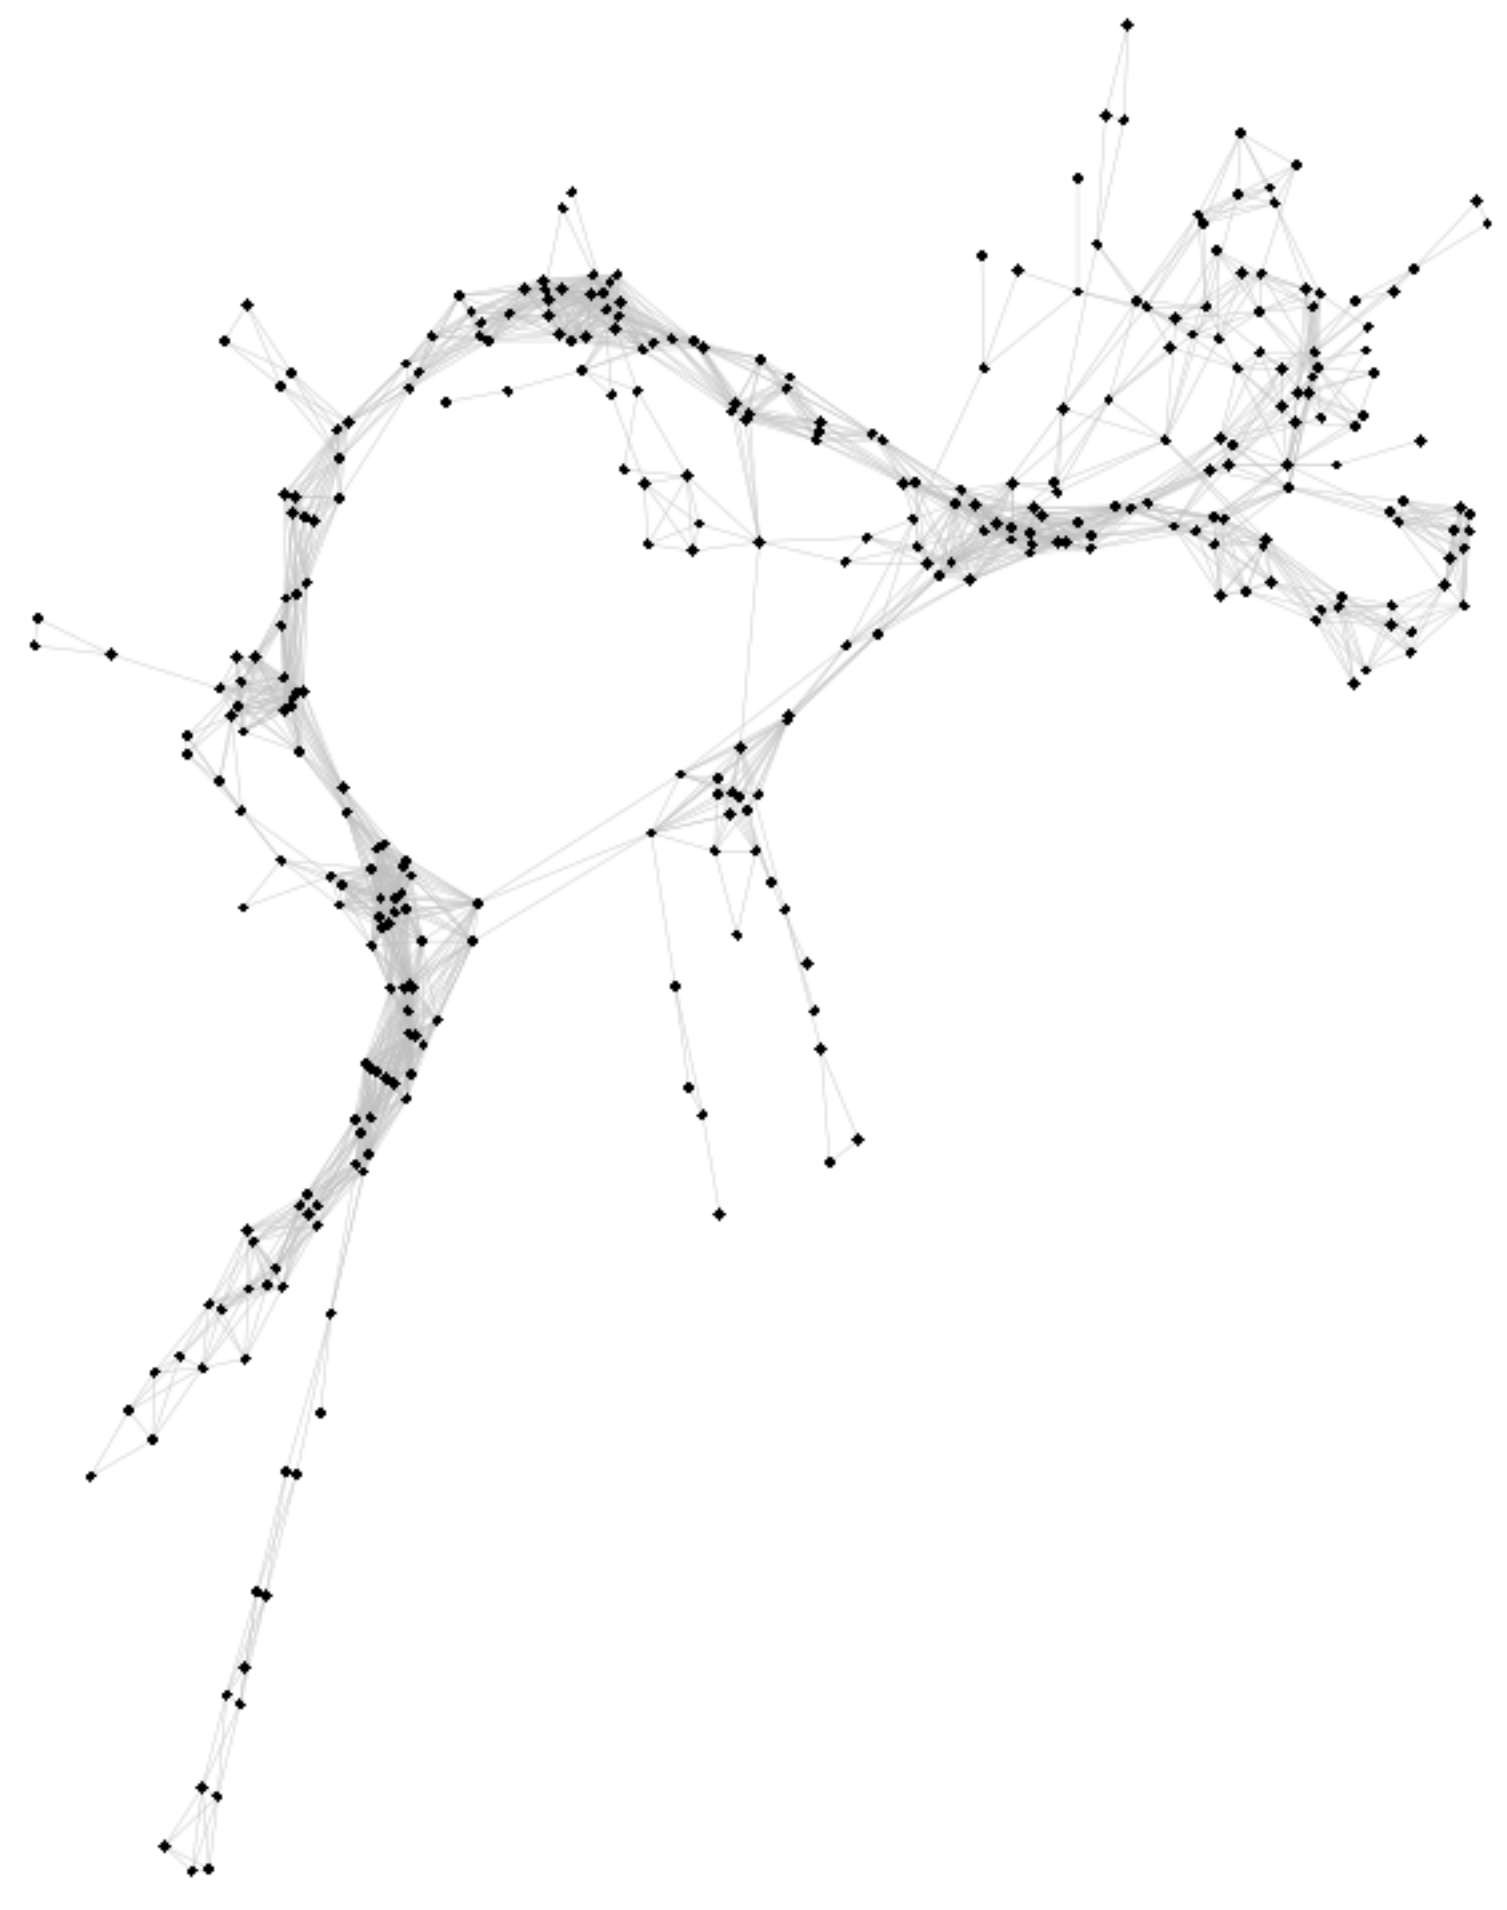

**CL169**

Number of reads: 332  
 Number of pairs: 1999  
 Density: 0.03638  
 Diameter: NA  
 Mean edge weight: 188.36  
 Max. degree: 27

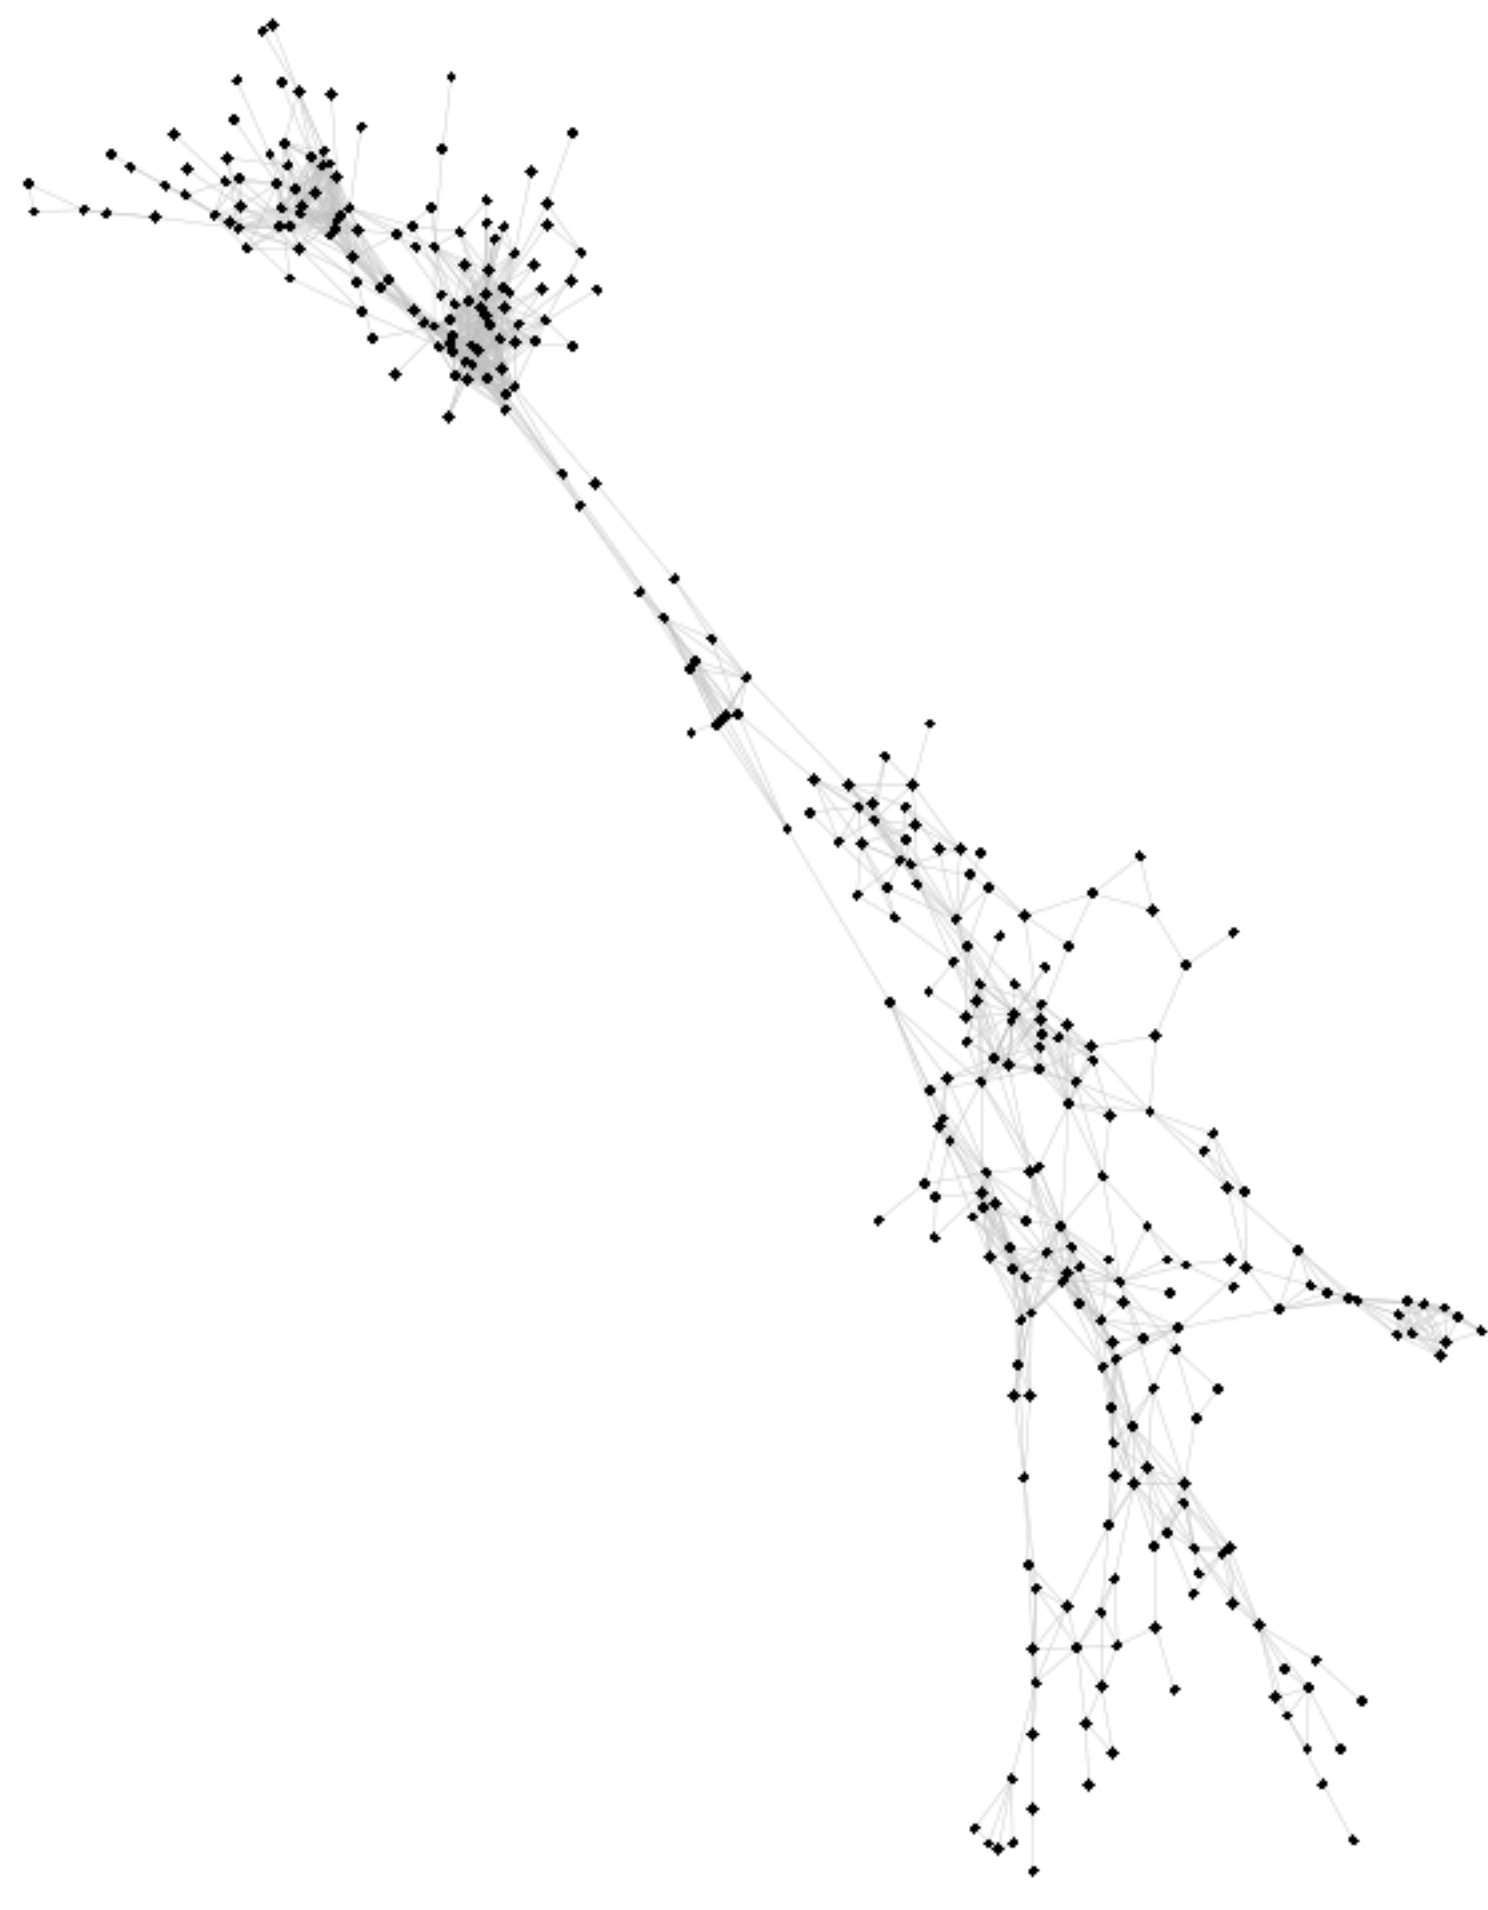

**CL170**

Number of reads: 323  
 Number of pairs: 1228  
 Density: 0.02361  
 Diameter: NA  
 Mean edge weight: 149.6  
 Max. degree: 33

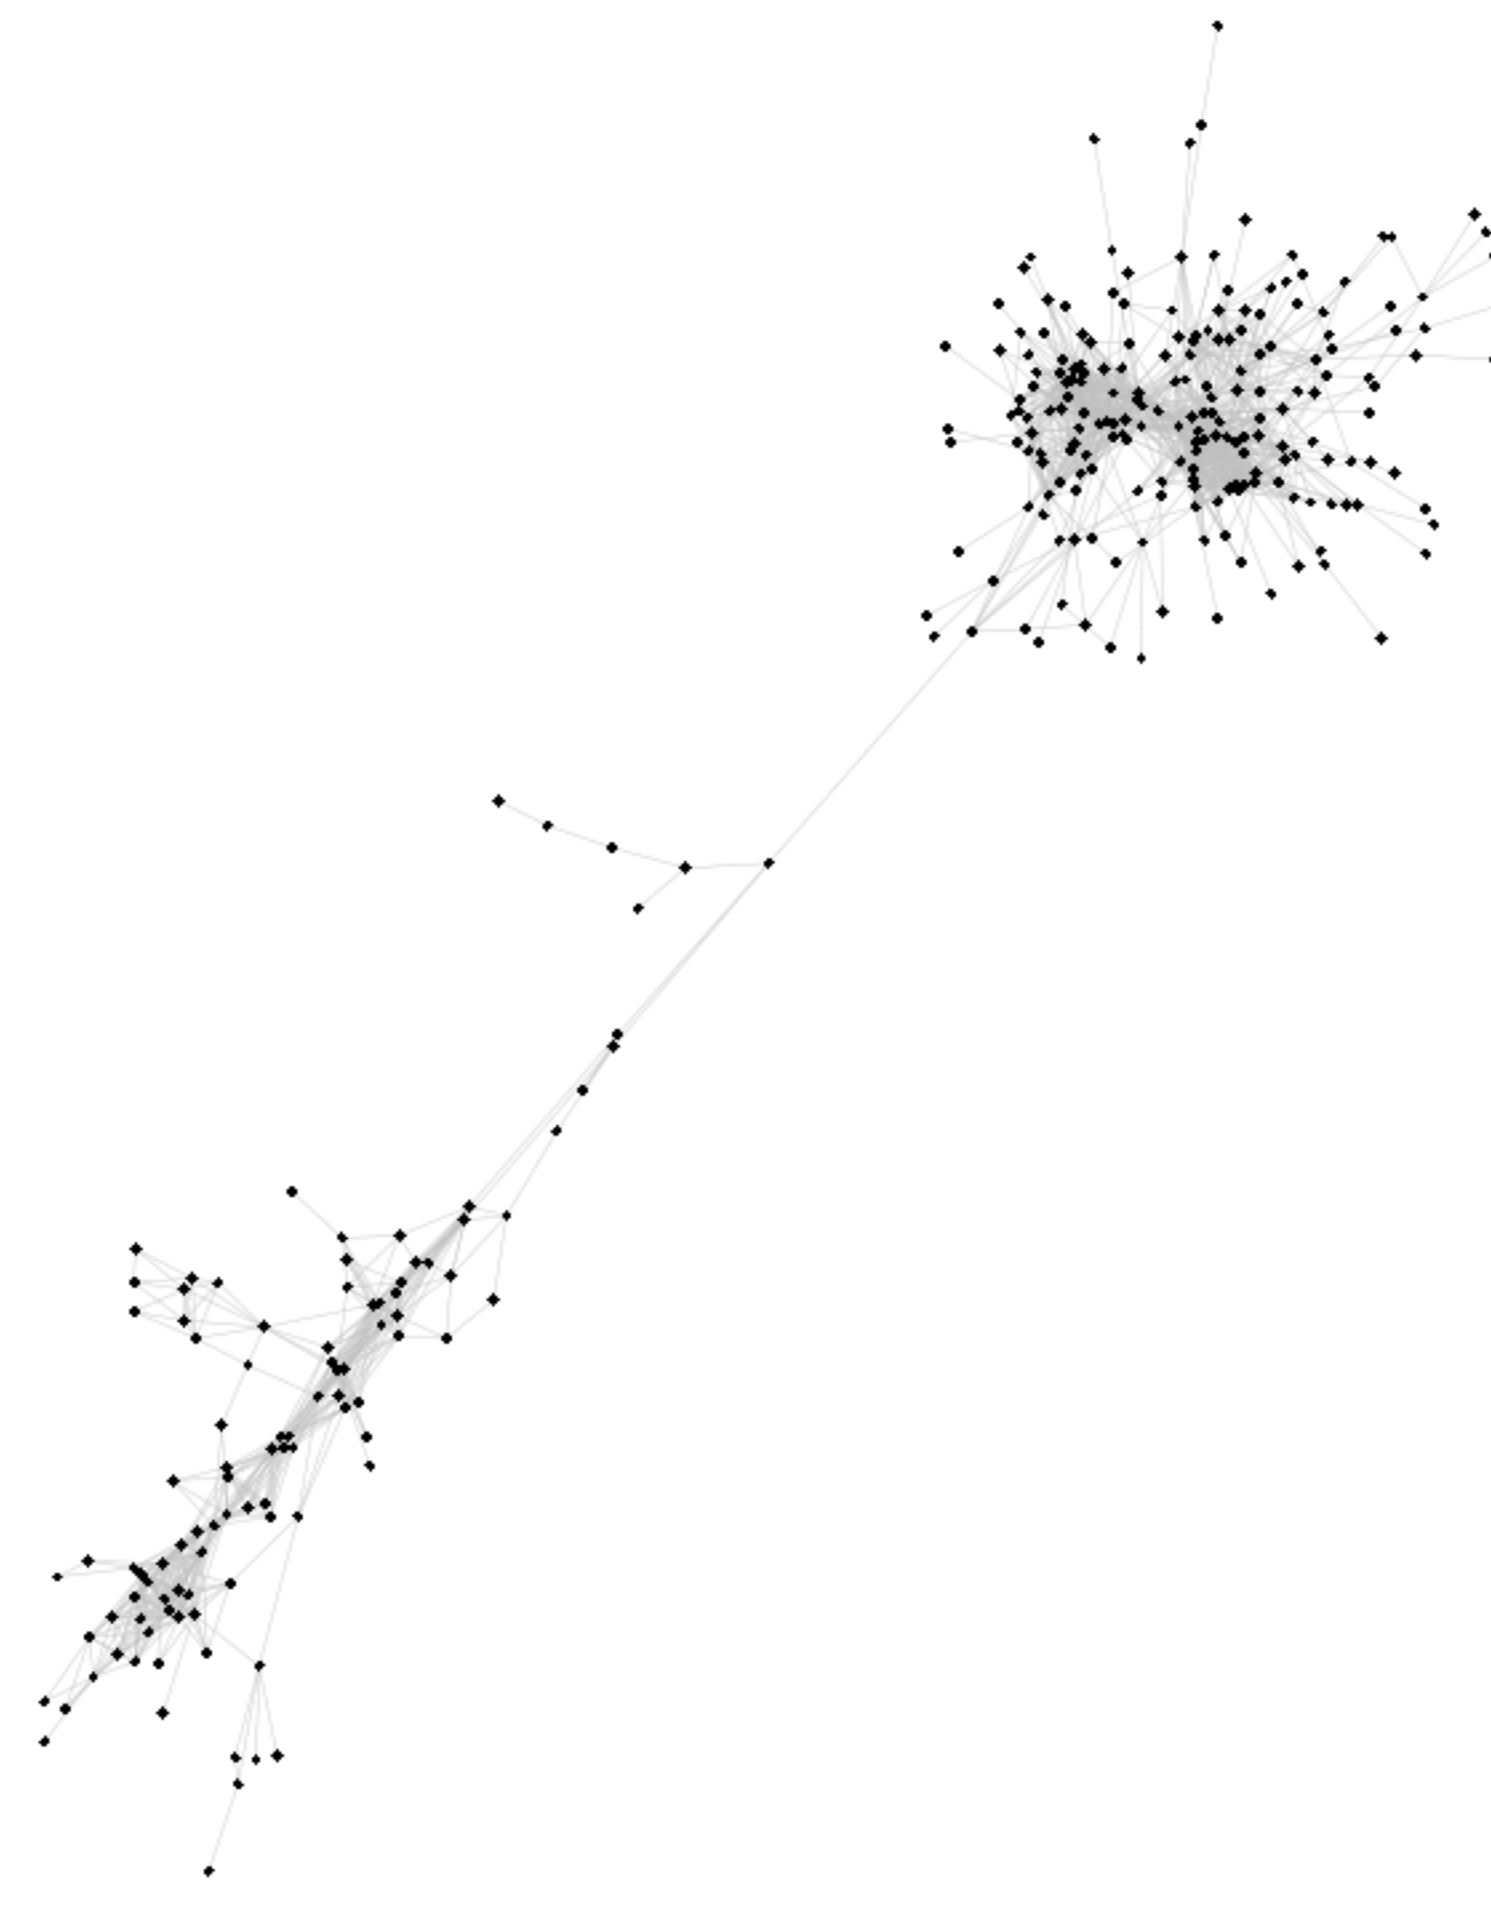

**CL171**

Number of reads: 302  
 Number of pairs: 1518  
 Density: 0.0334  
 Diameter: NA  
 Mean edge weight: 148.55  
 Max. degree: 50

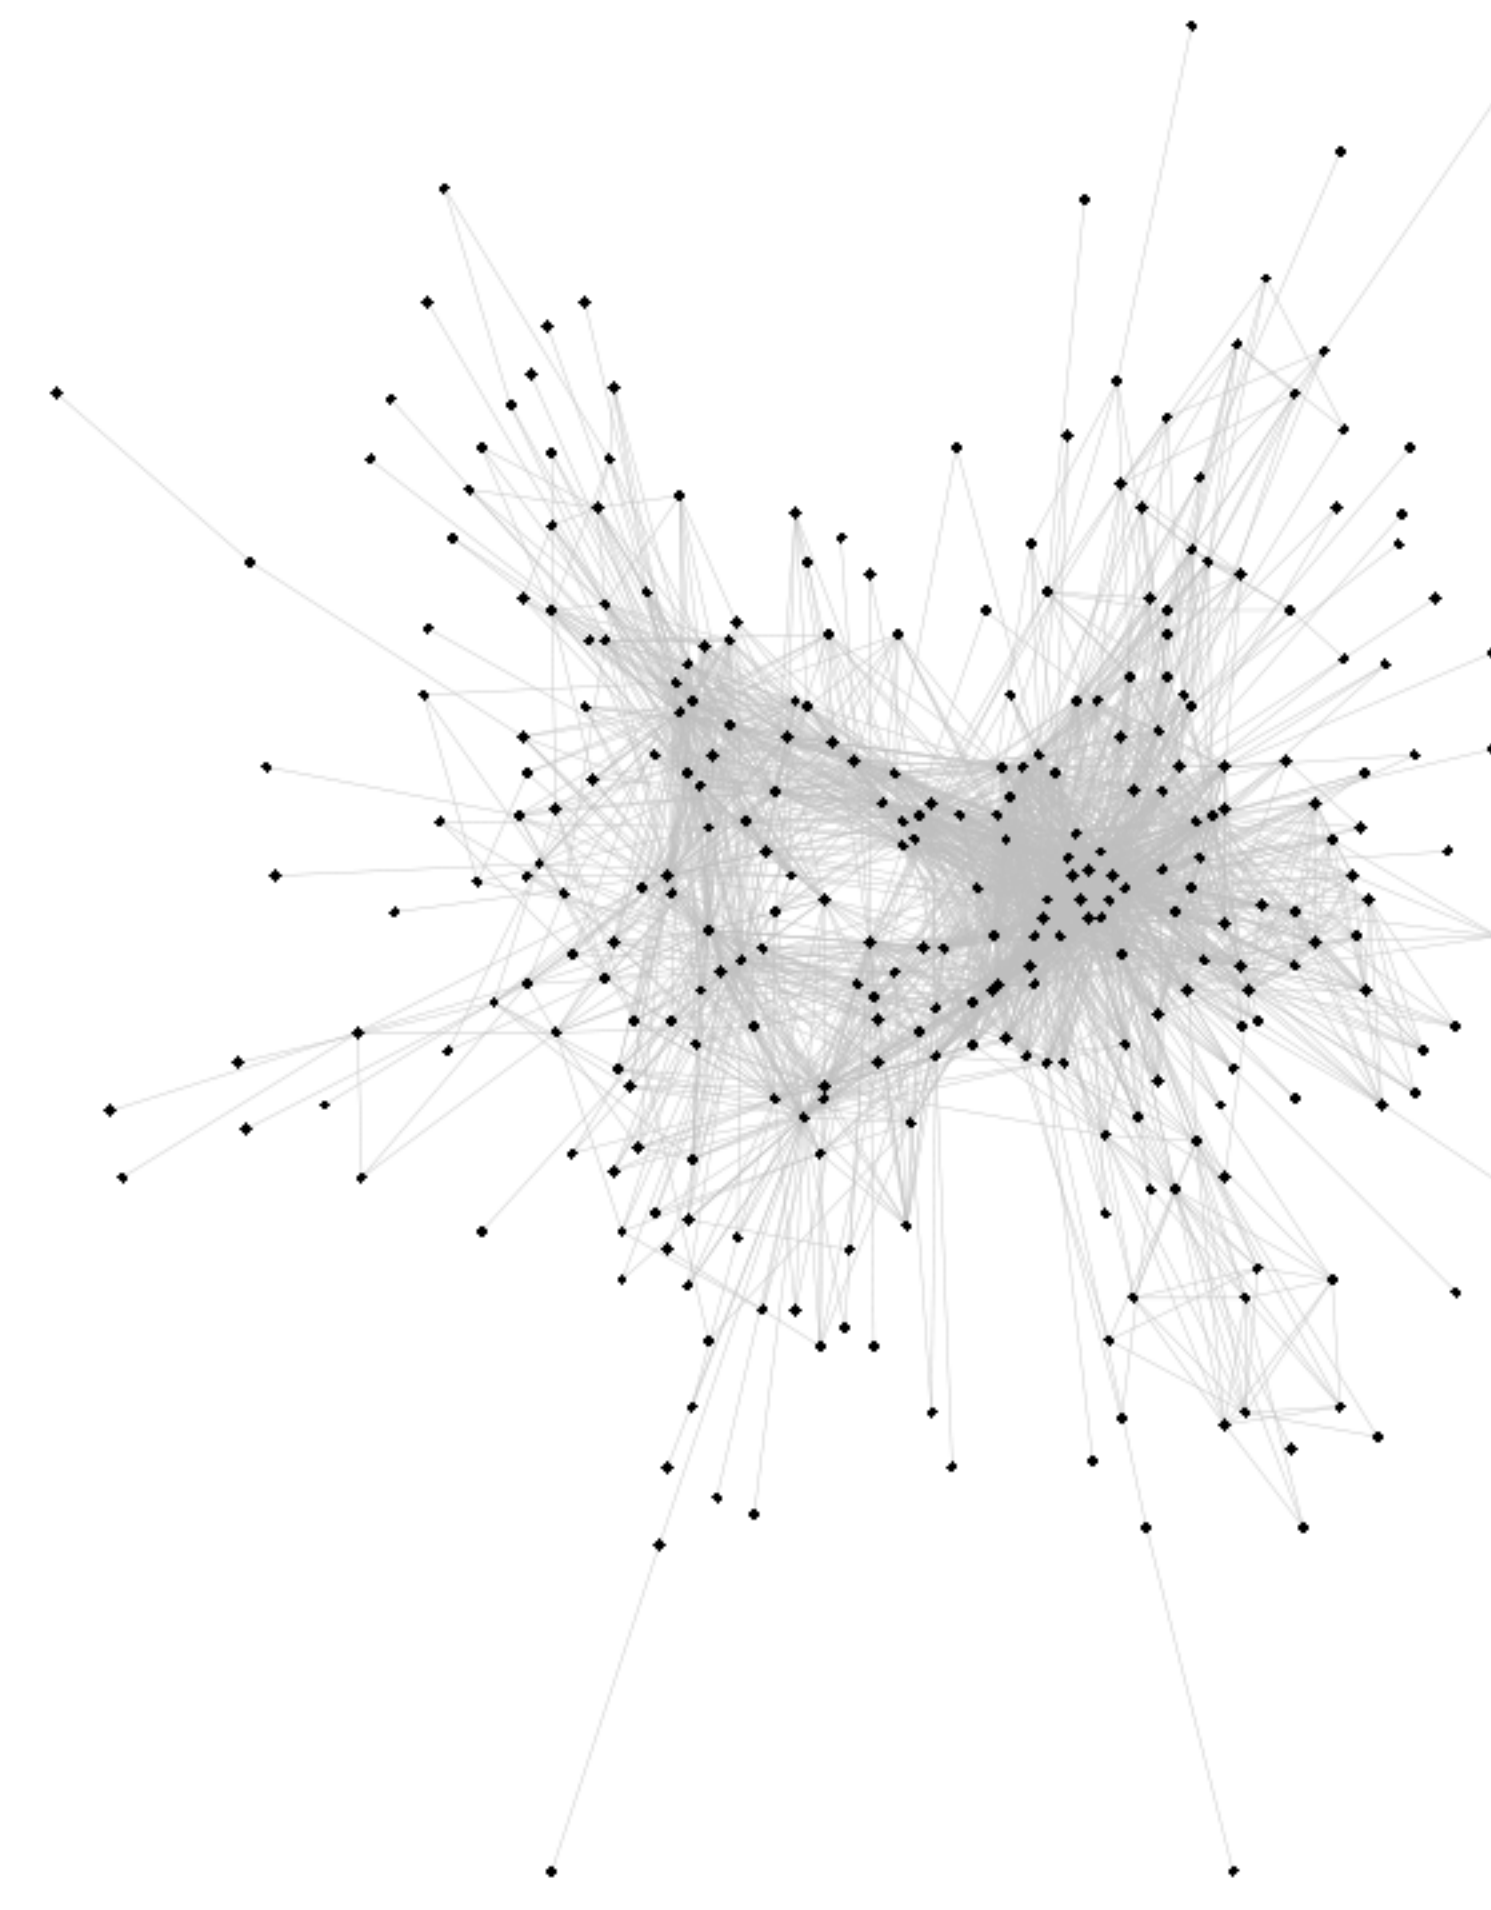

**CL172**

Number of reads: 299  
 Number of pairs: 2558  
 Density: 0.05742  
 Diameter: NA  
 Mean edge weight: 147  
 Max. degree: 88

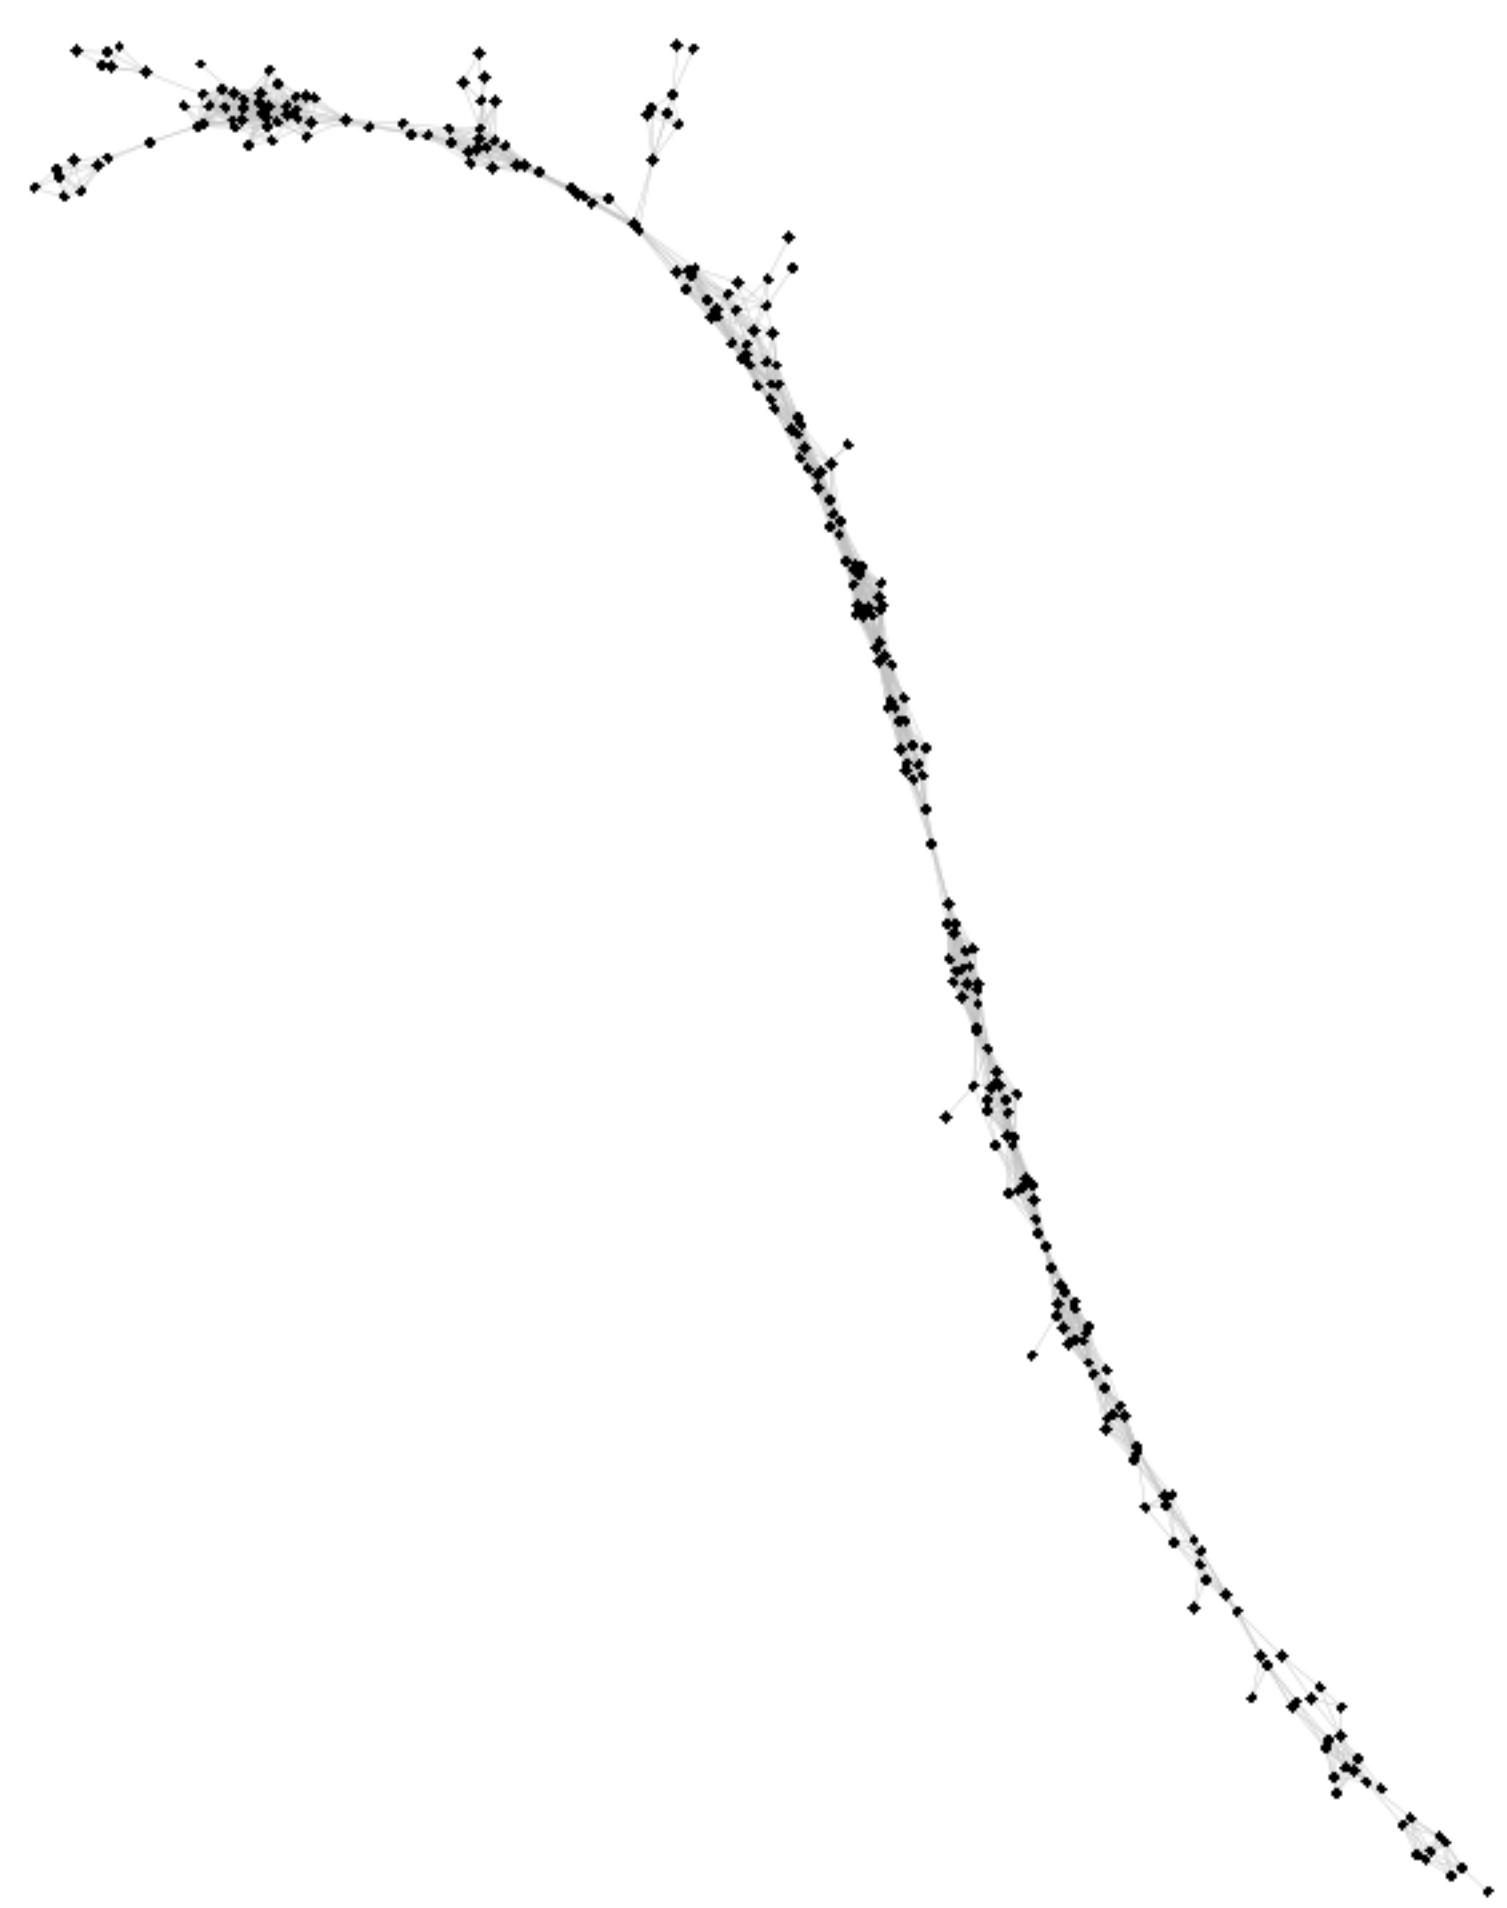

**CL173**

Number of reads: 282  
 Number of pairs: 1571  
 Density: 0.03965  
 Diameter: NA  
 Mean edge weight: 176.03  
 Max. degree: 23

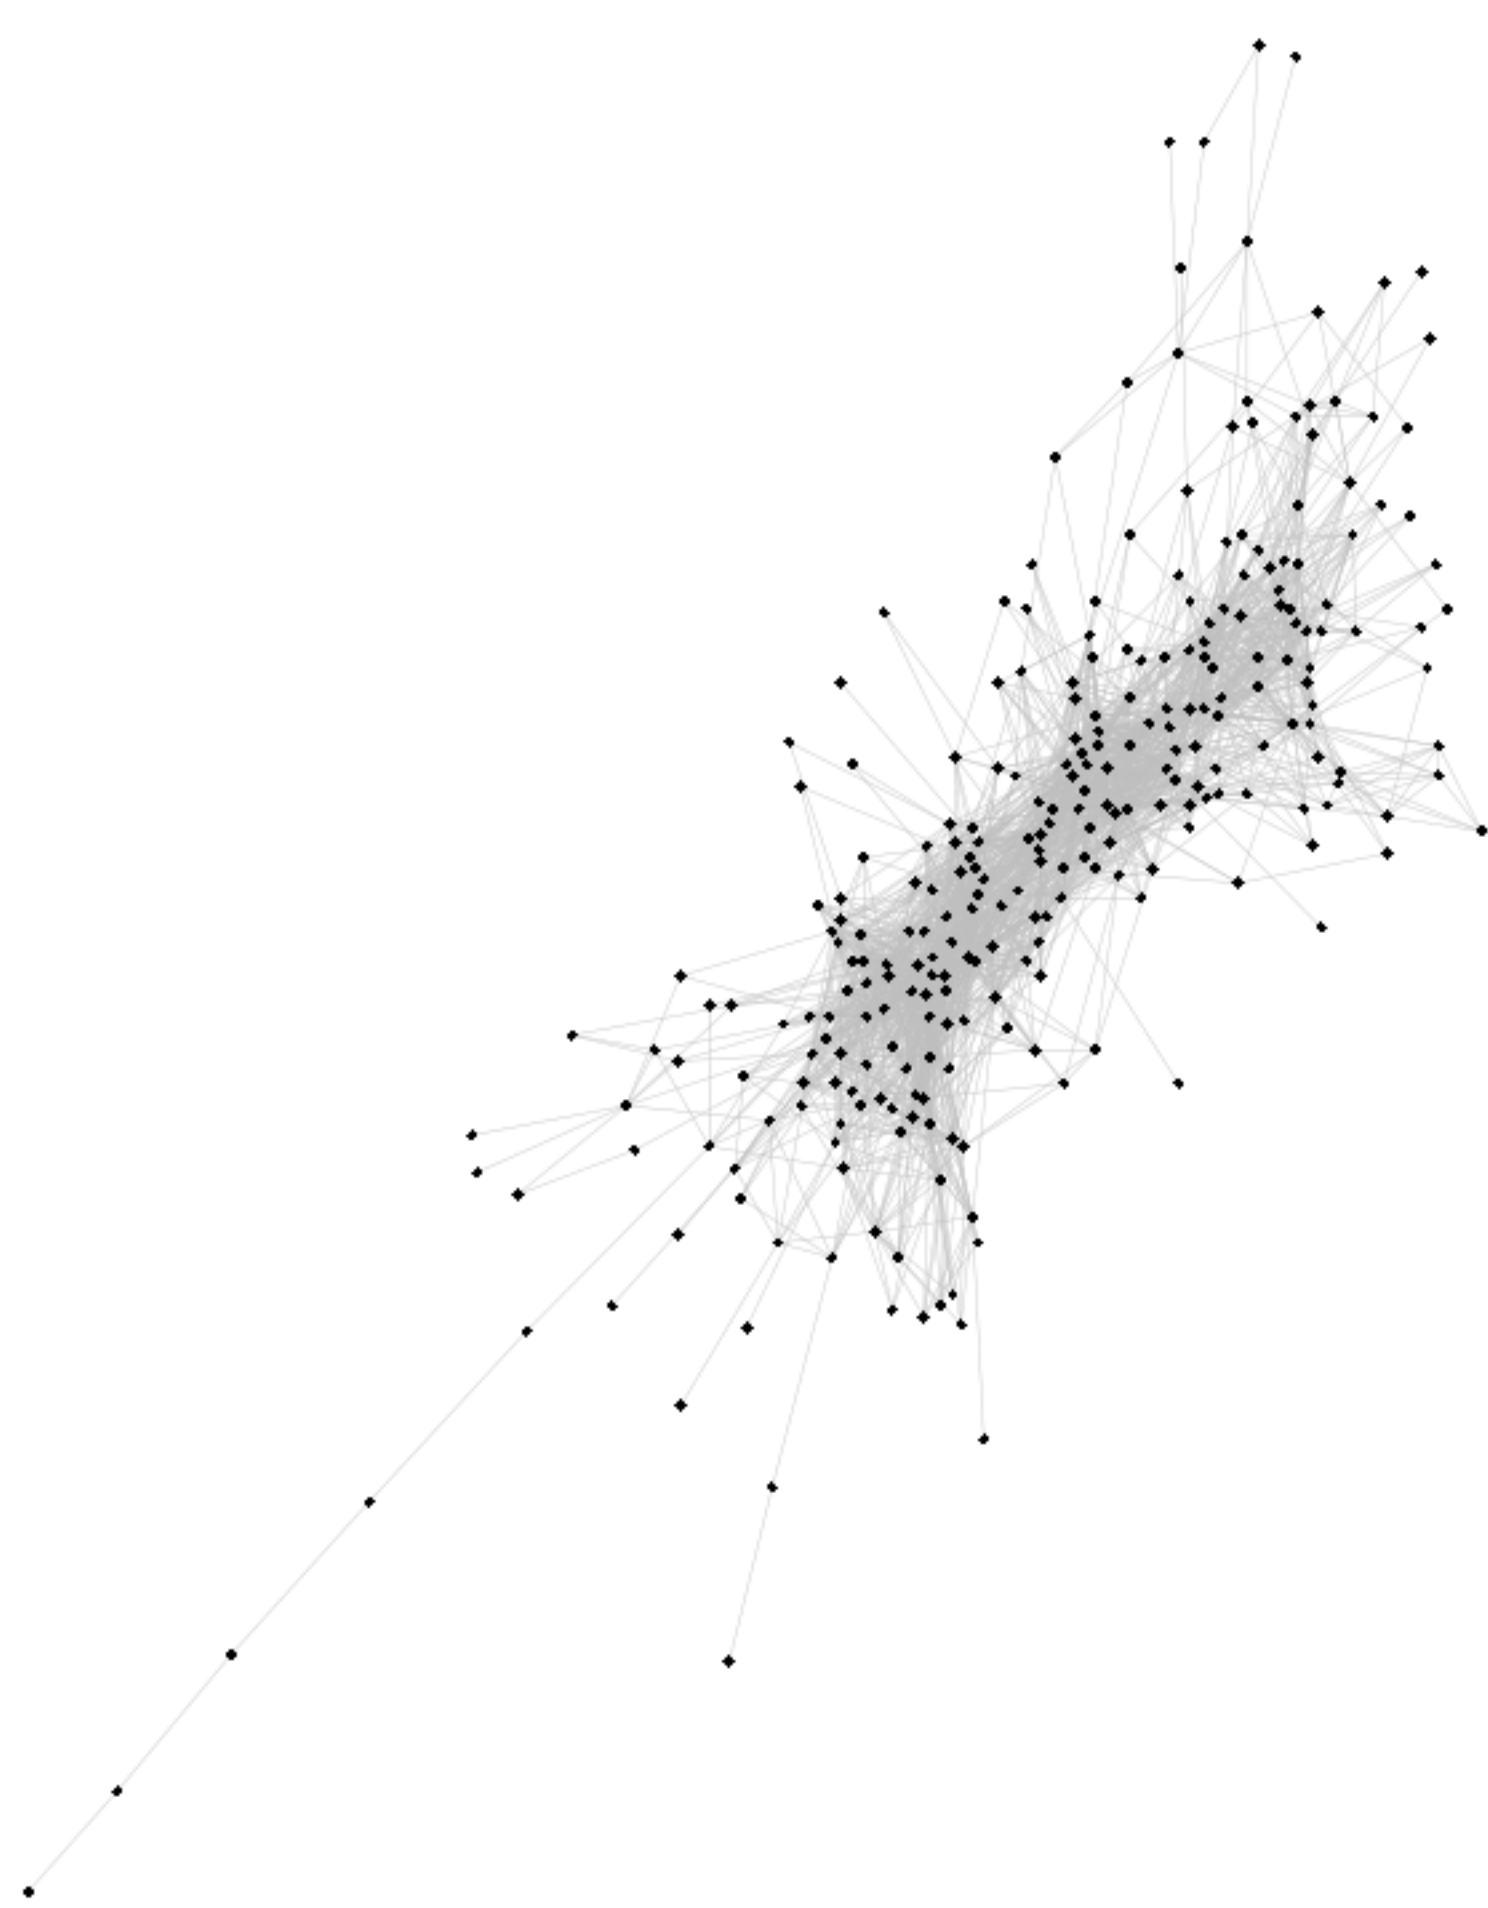

**CL174**

Number of reads: 277  
 Number of pairs: 2392  
 Density: 0.06258  
 Diameter: NA  
 Mean edge weight: 135.3  
 Max. degree: 68

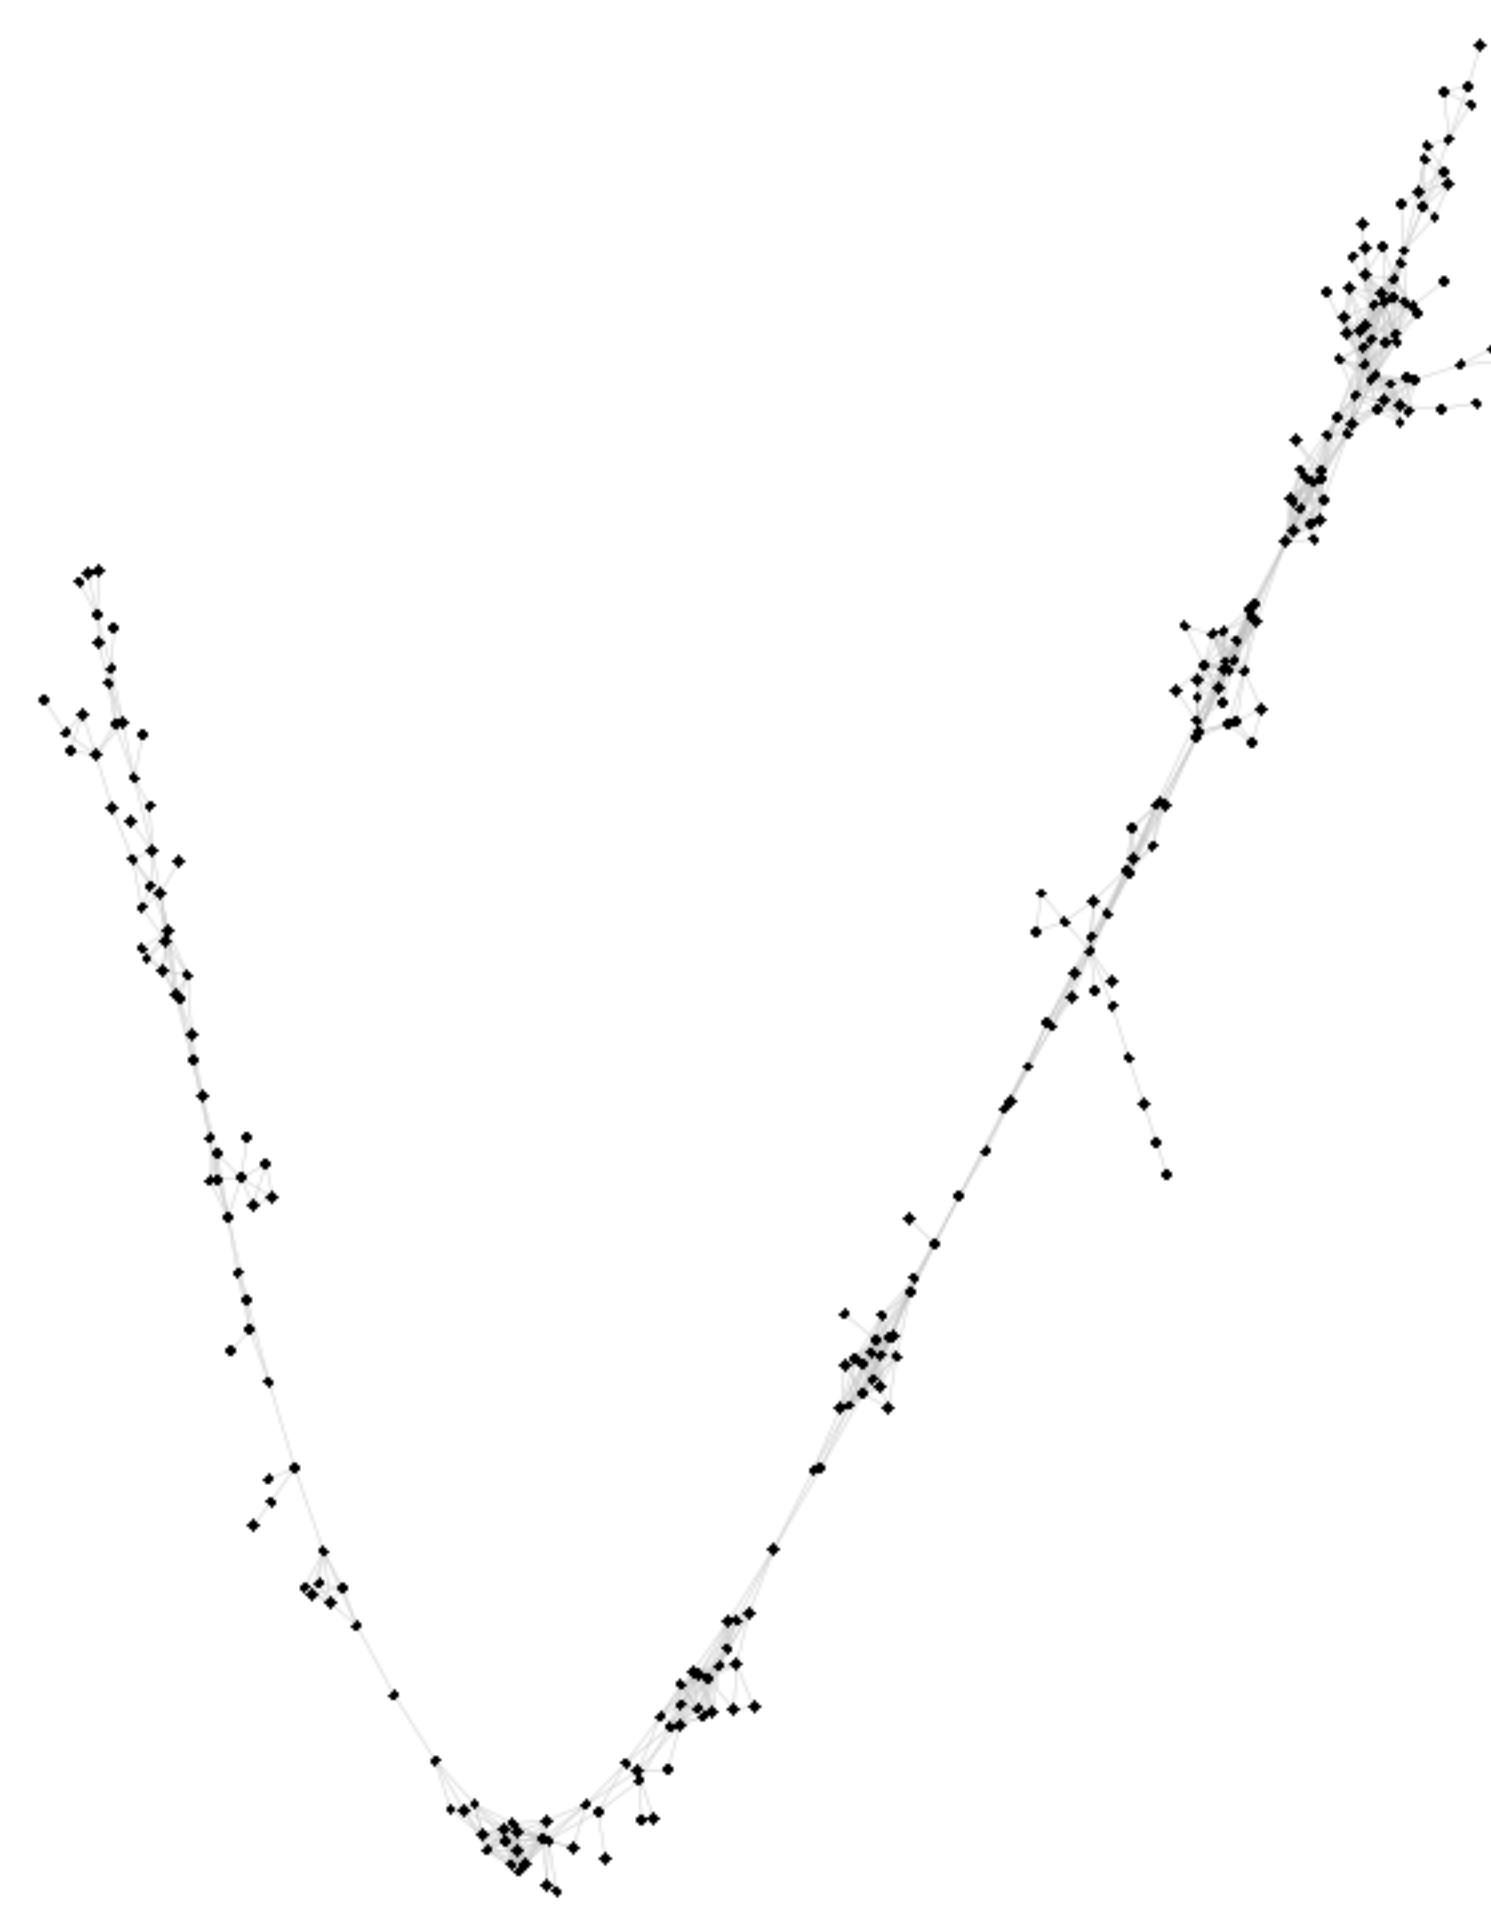

**CL175**

Number of reads: 270  
 Number of pairs: 893  
 Density: 0.02459  
 Diameter: NA  
 Mean edge weight: 145.67  
 Max. degree: 20

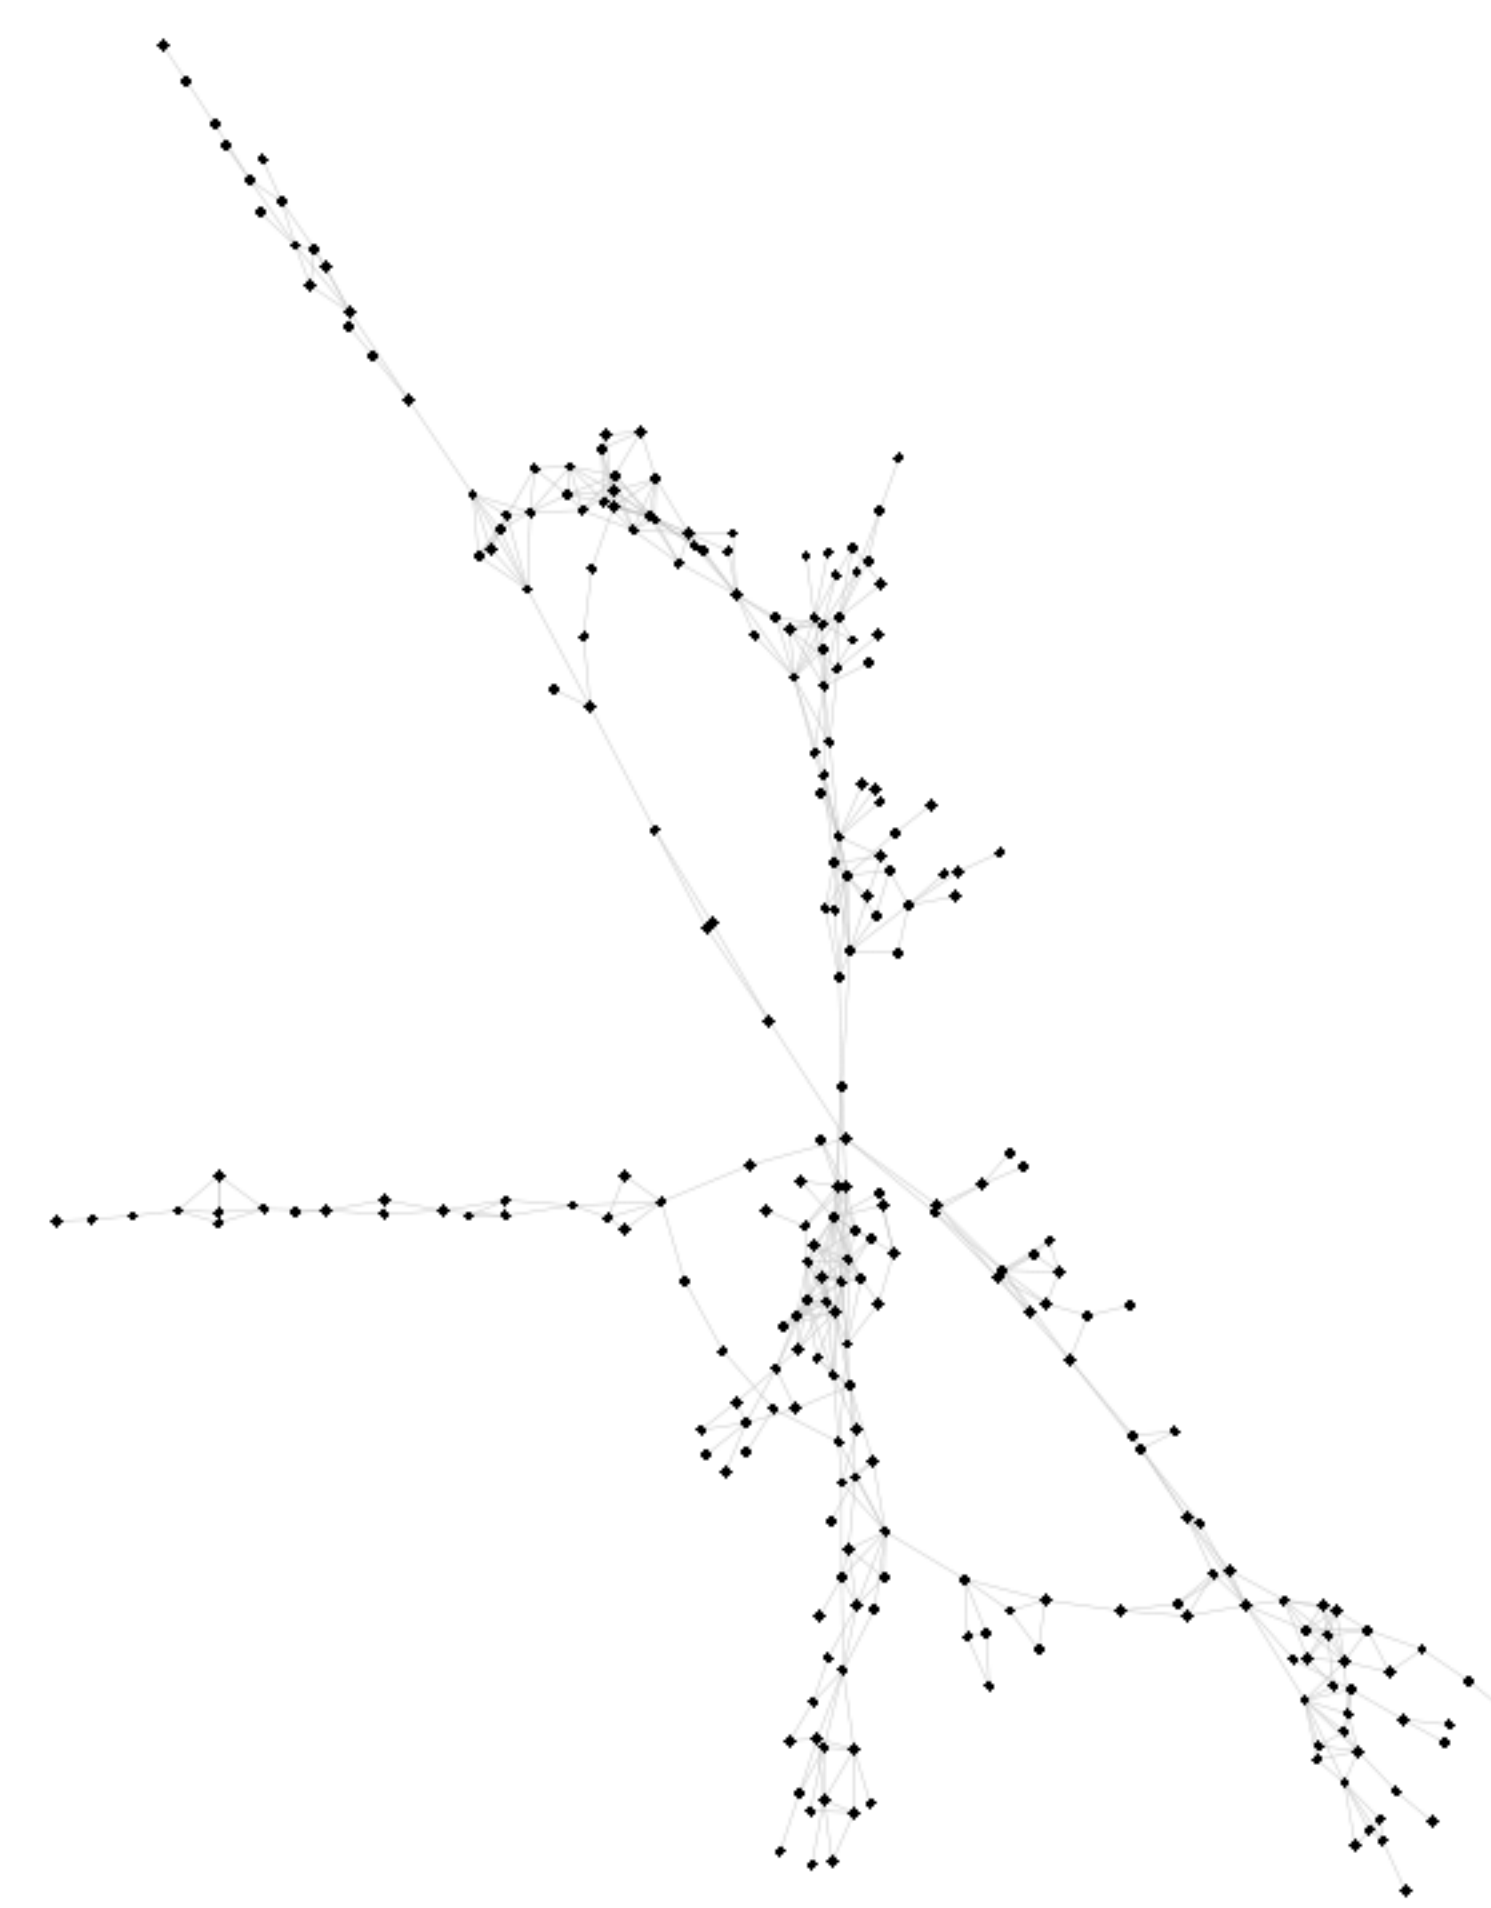

**CL176**

Number of reads: 258  
 Number of pairs: 552  
 Density: 0.01665  
 Diameter: NA  
 Mean edge weight: 159.78  
 Max. degree: 17

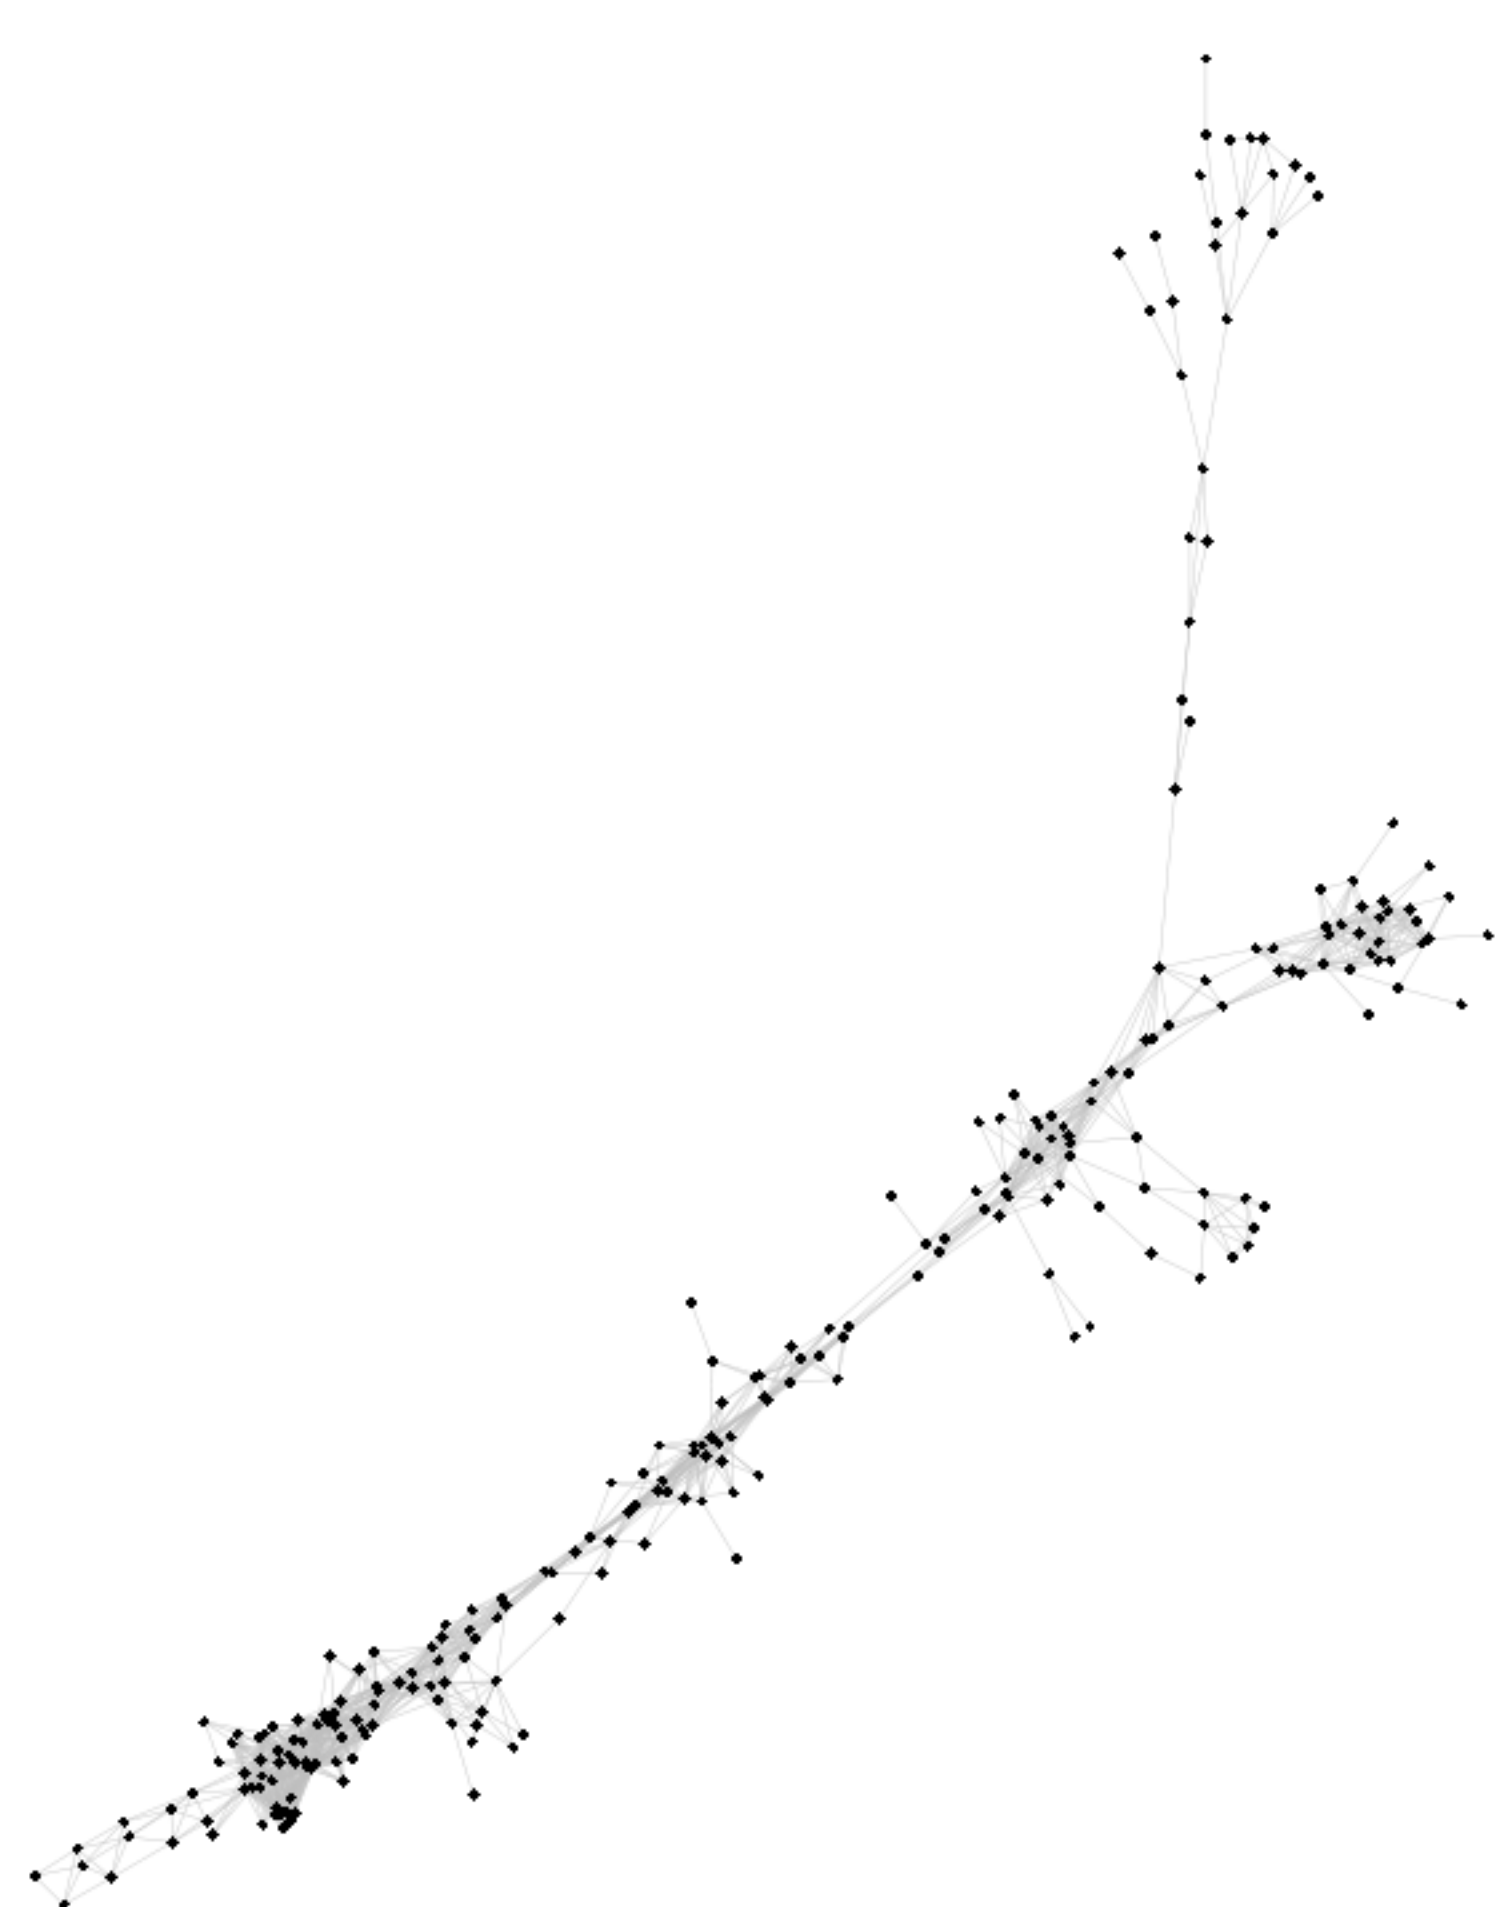

**CL177**

Number of reads: 245  
 Number of pairs: 1347  
 Density: 0.04507  
 Diameter: NA  
 Mean edge weight: 150.82  
 Max. degree: 40

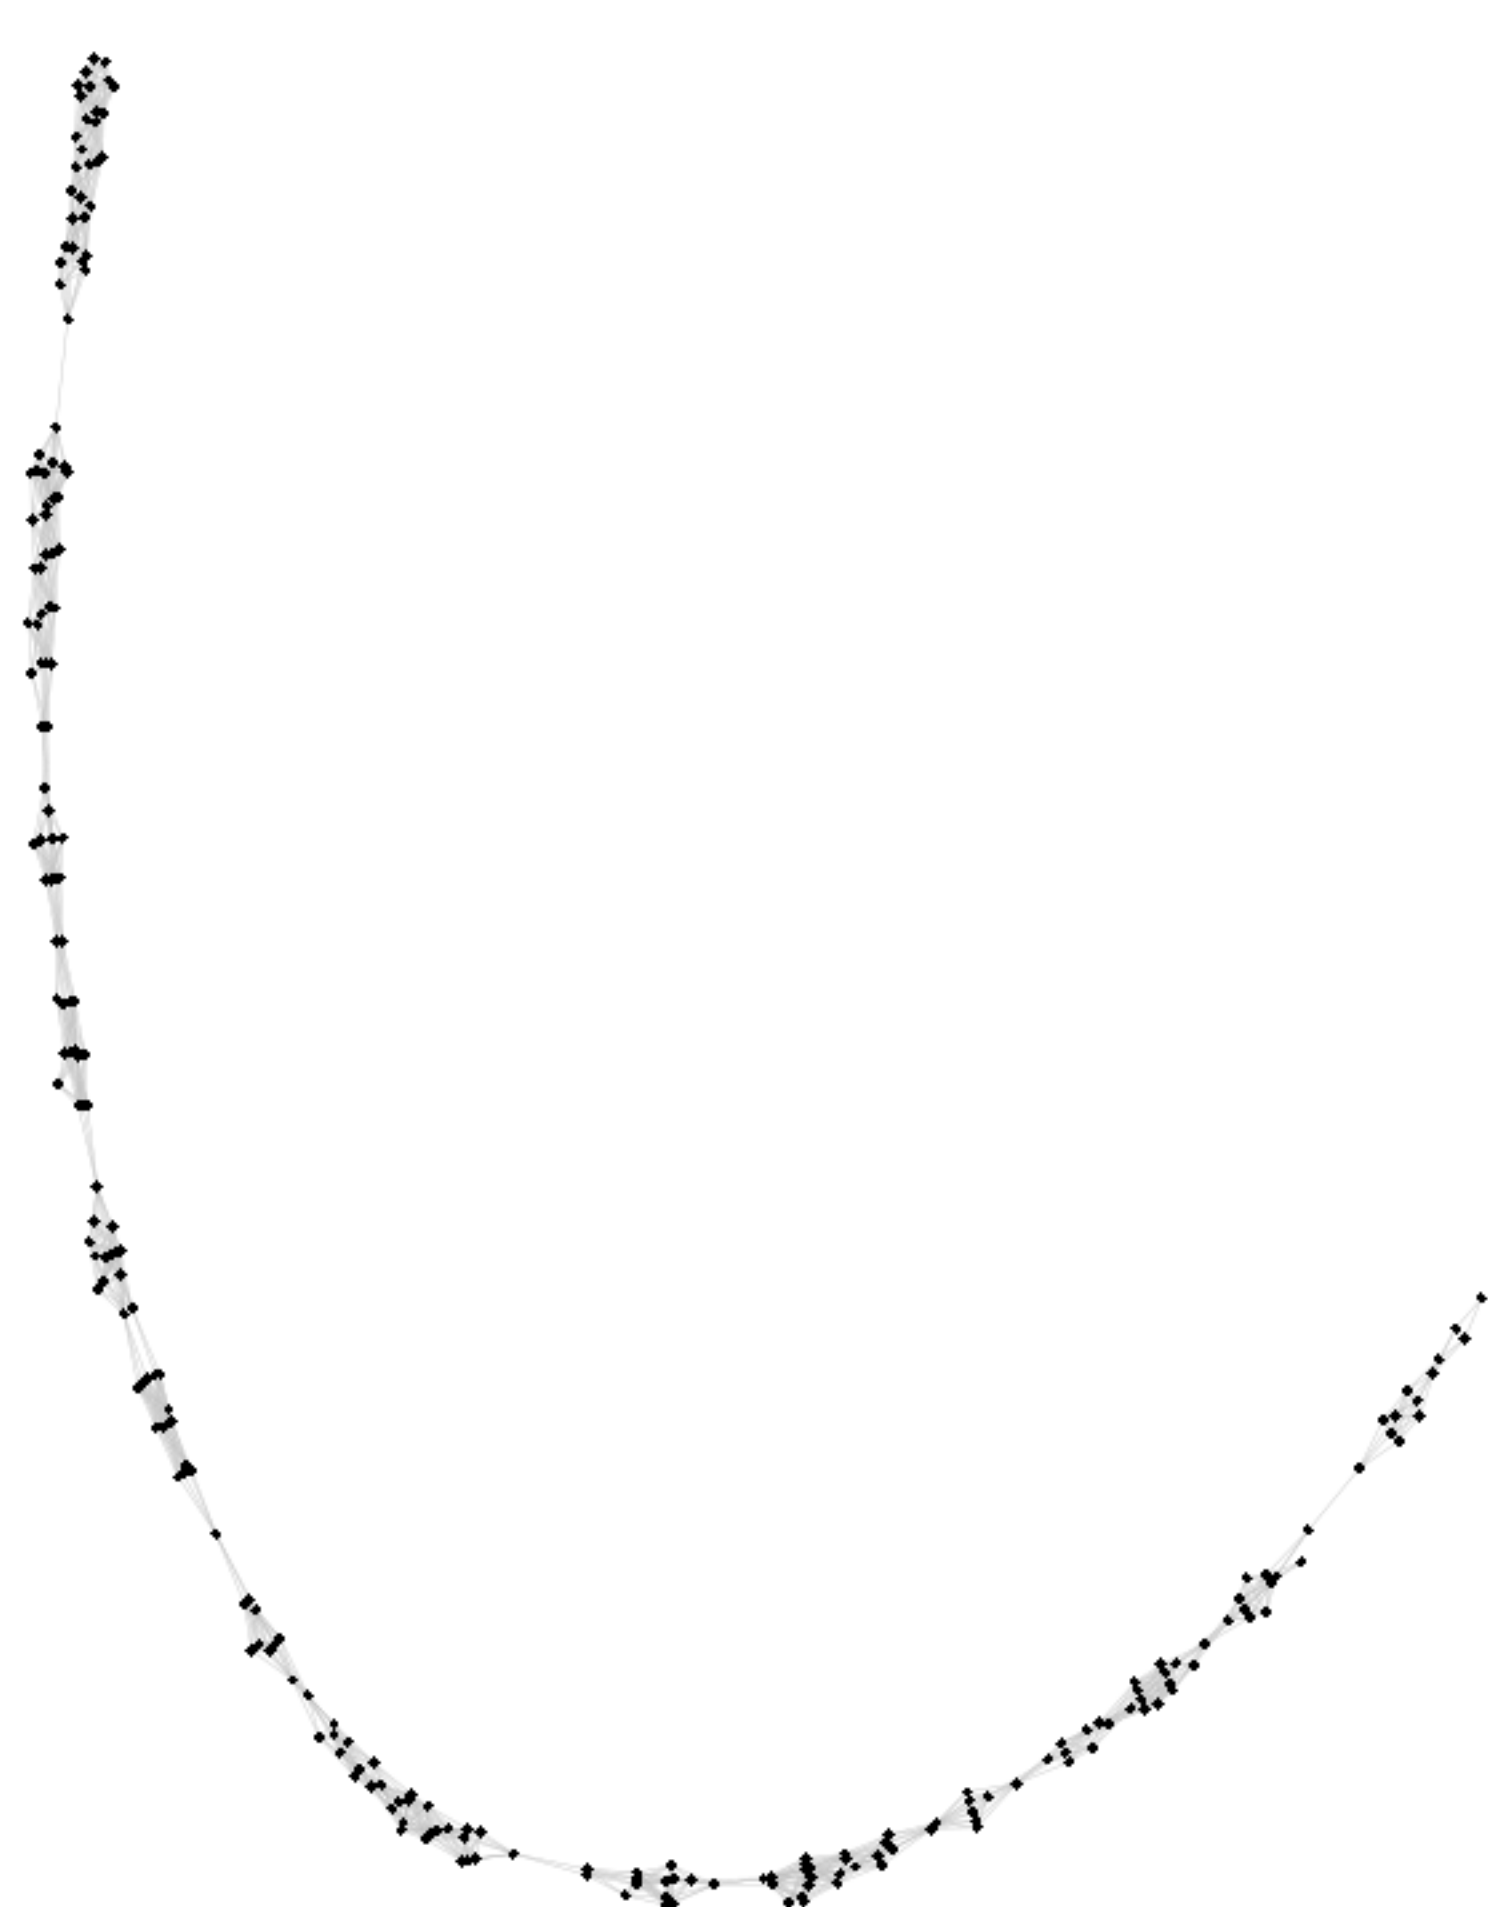

**CL178**

Number of reads: 242  
 Number of pairs: 1279  
 Density: 0.04386  
 Diameter: NA  
 Mean edge weight: 216.22  
 Max. degree: 17

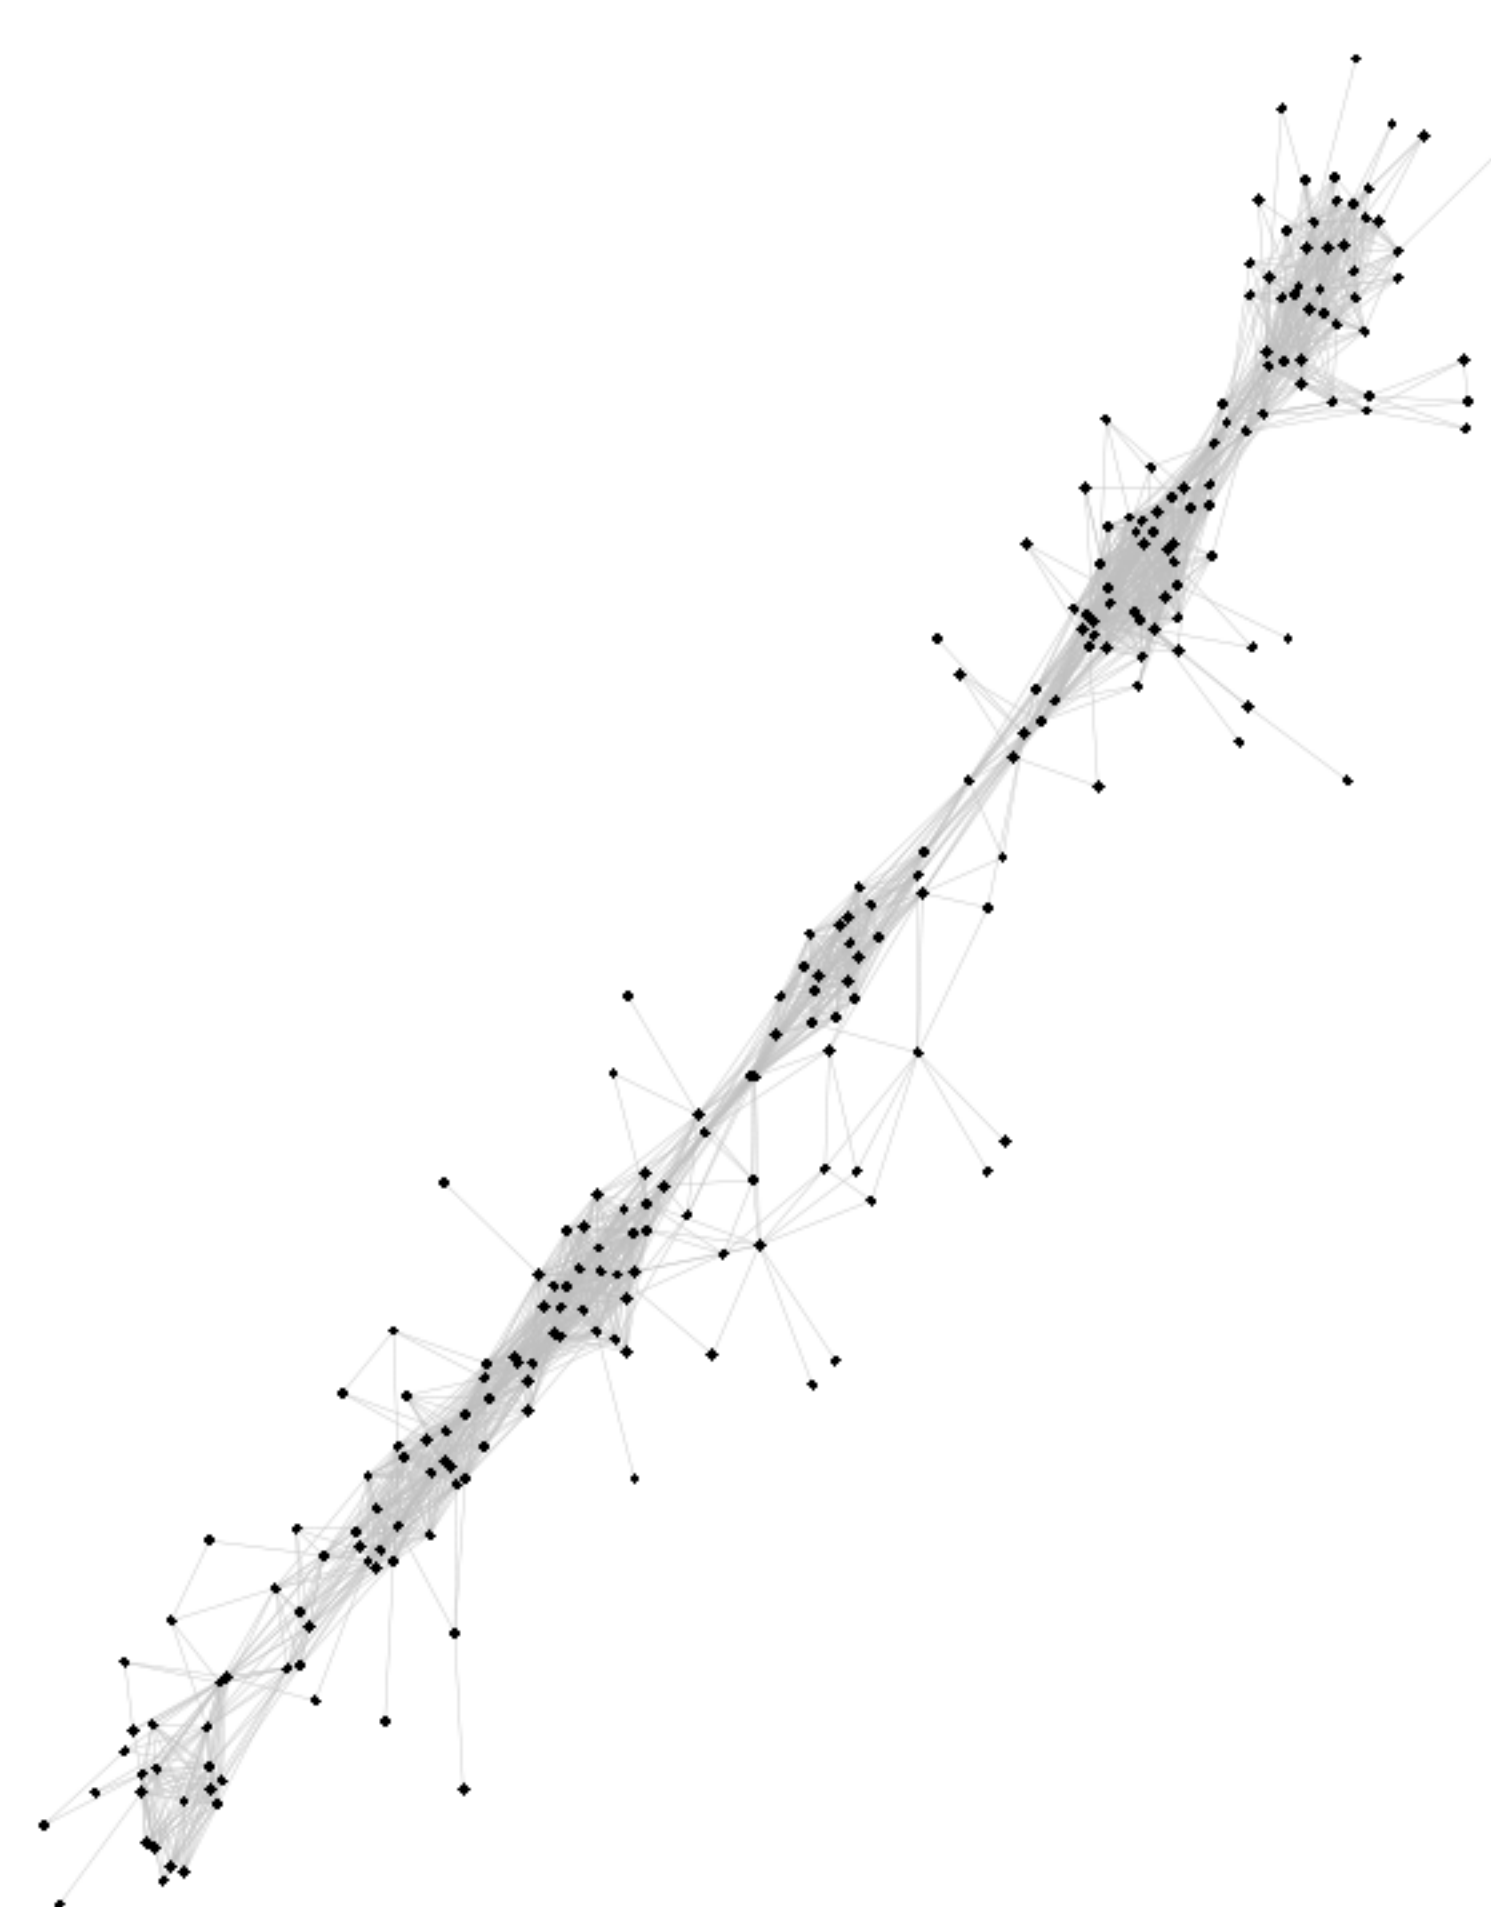

**CL179**

Number of reads: 240  
 Number of pairs: 2071  
 Density: 0.07221  
 Diameter: NA  
 Mean edge weight: 162.24  
 Max. degree: 39

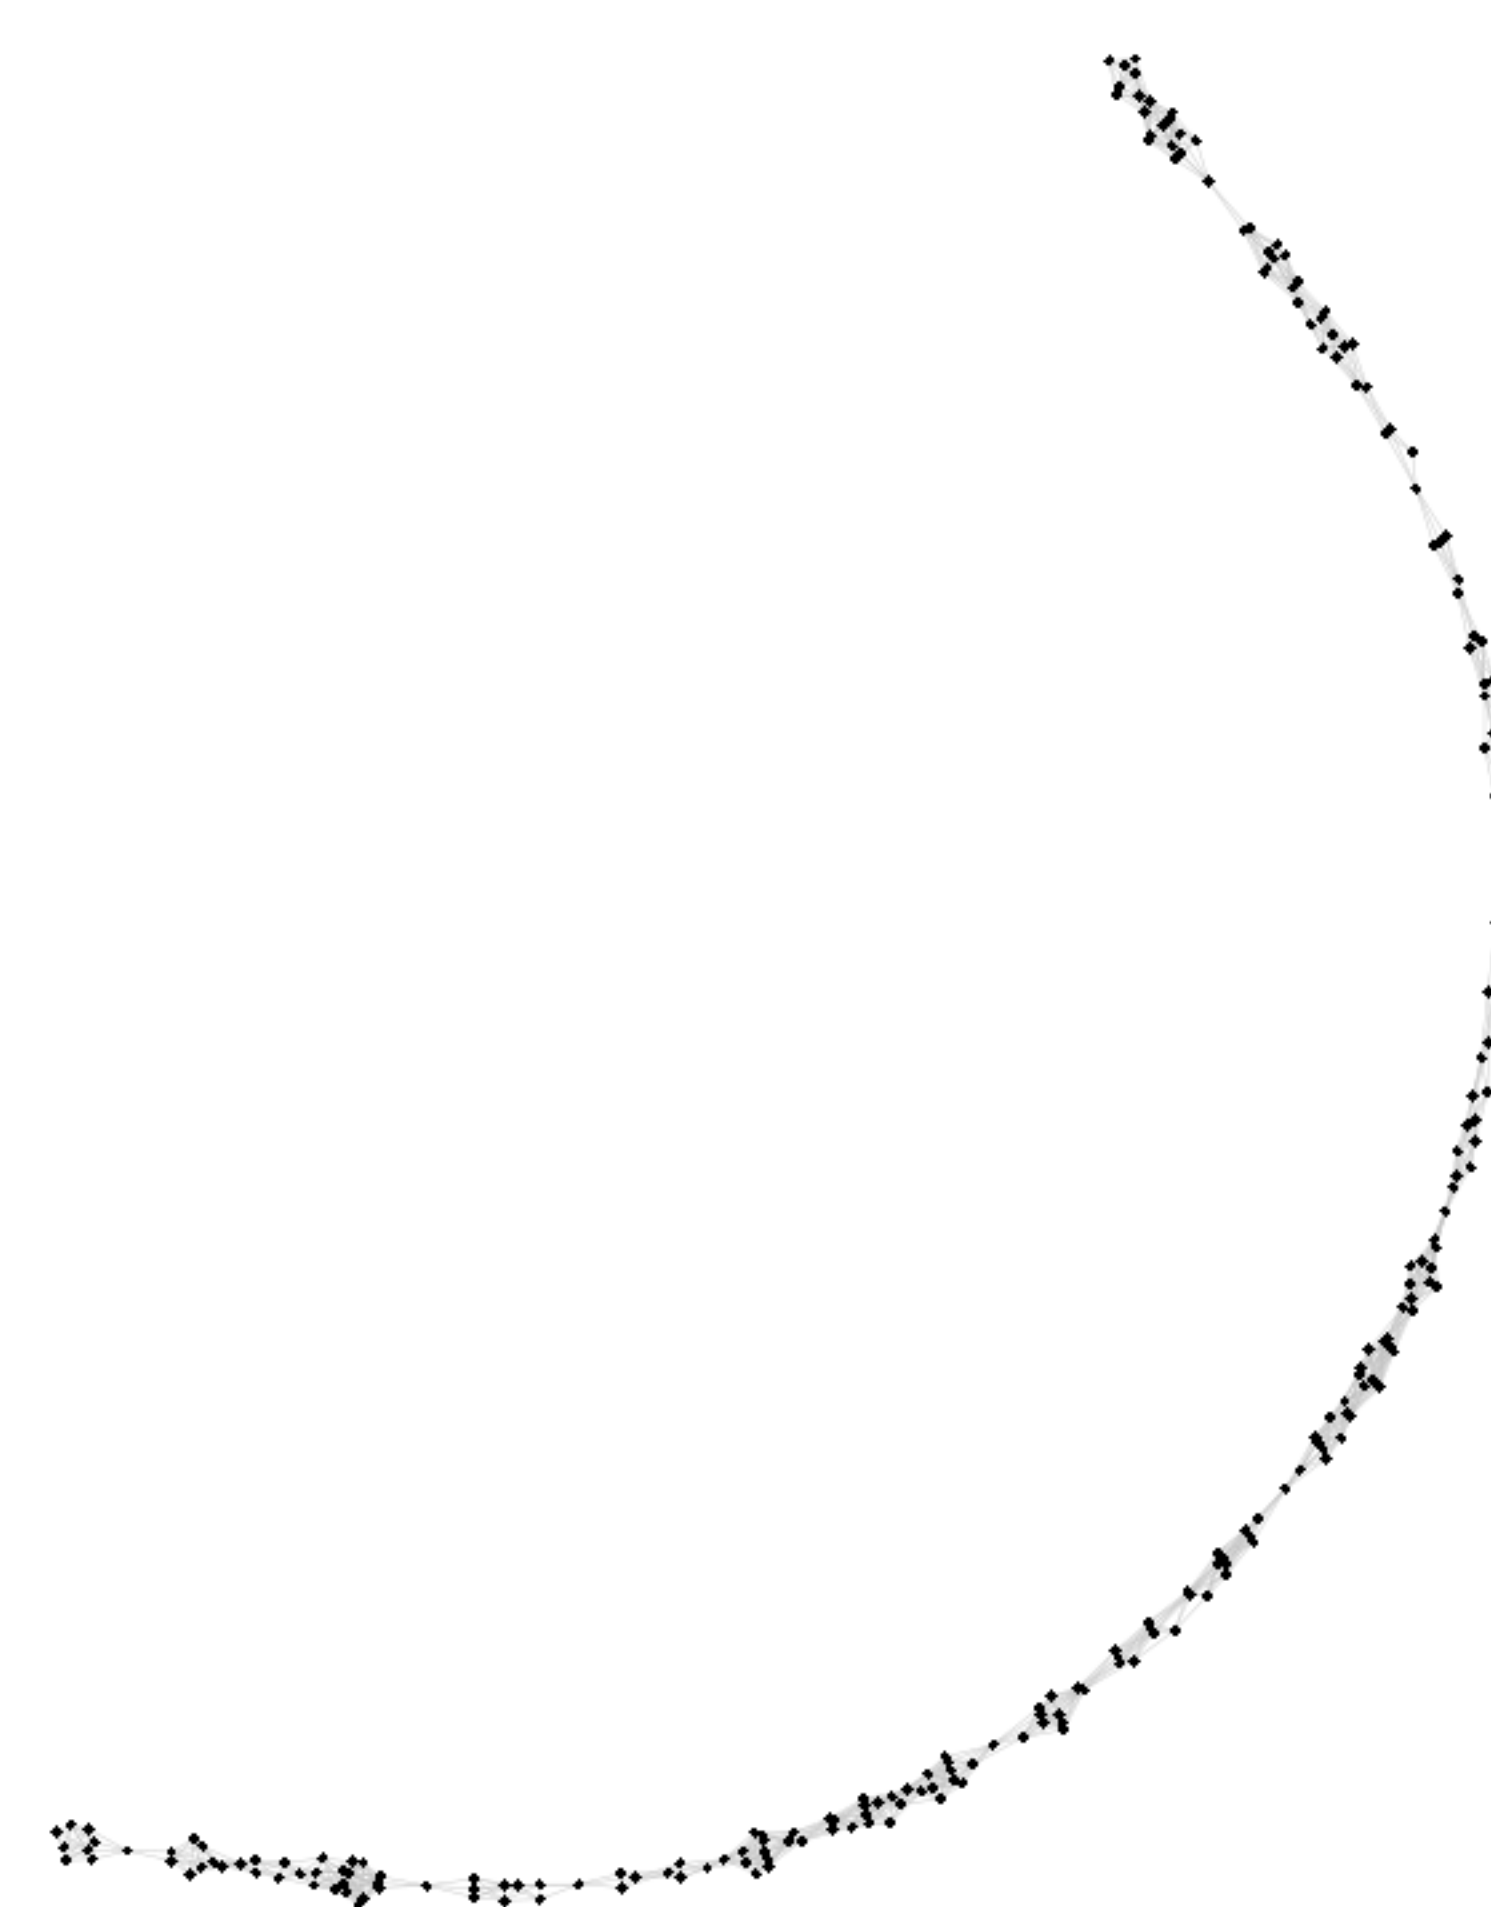

**CL180**

Number of reads: 235  
 Number of pairs: 1092  
 Density: 0.03972  
 Diameter: NA  
 Mean edge weight: 214.3  
 Max. degree: 16

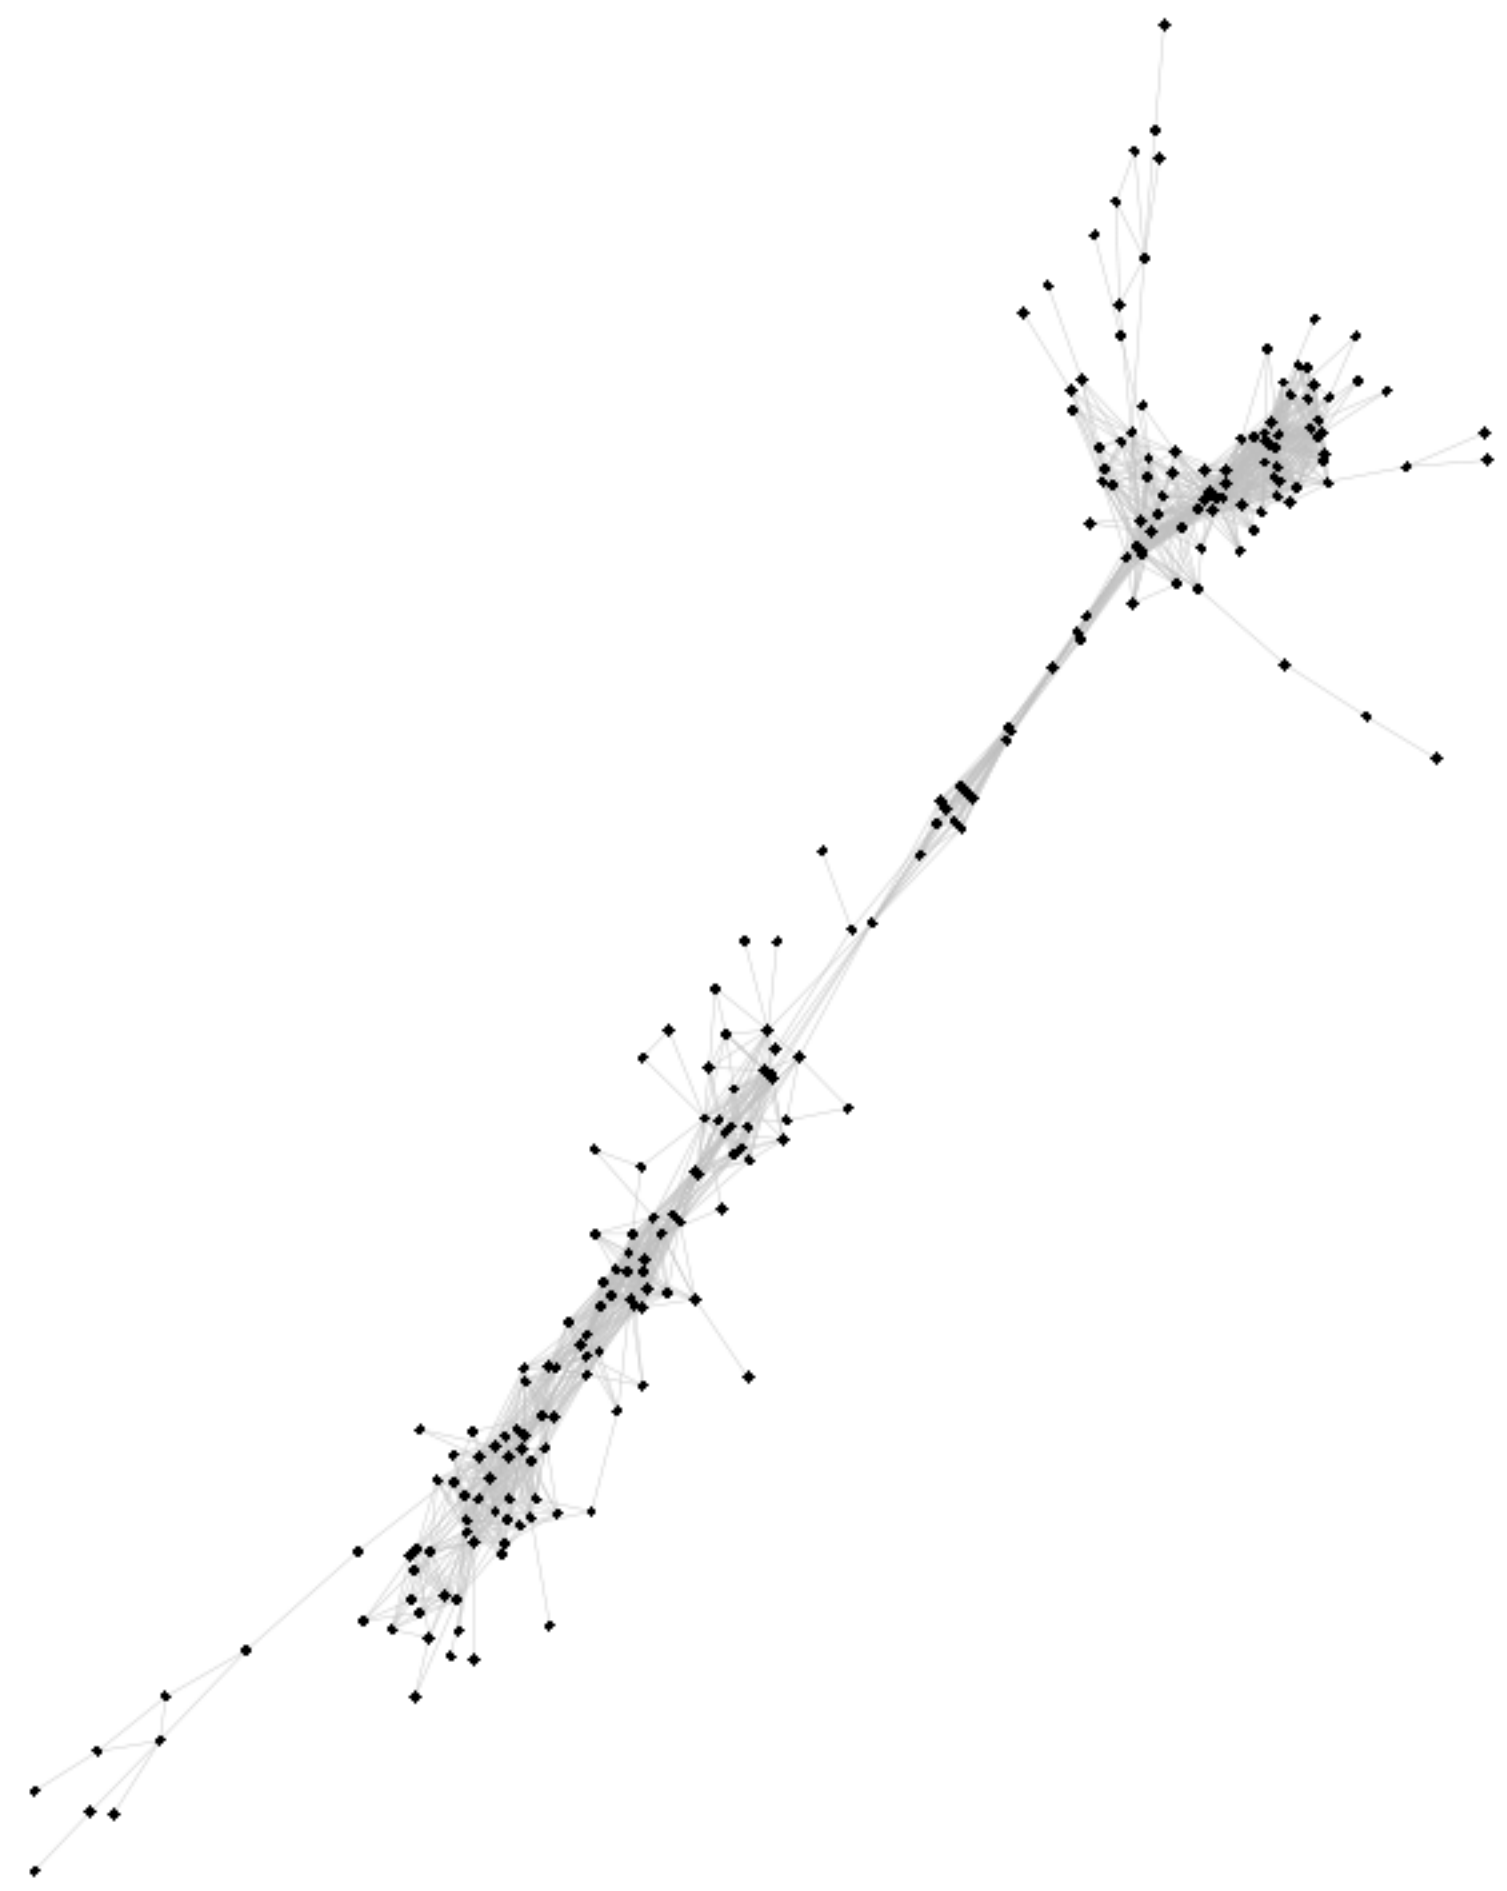

**CL181**

Number of reads: 231  
Number of pairs: 1553  
Density: 0.05846  
Diameter: NA  
Mean edge weigth: 153.57  
Max. degree: 40

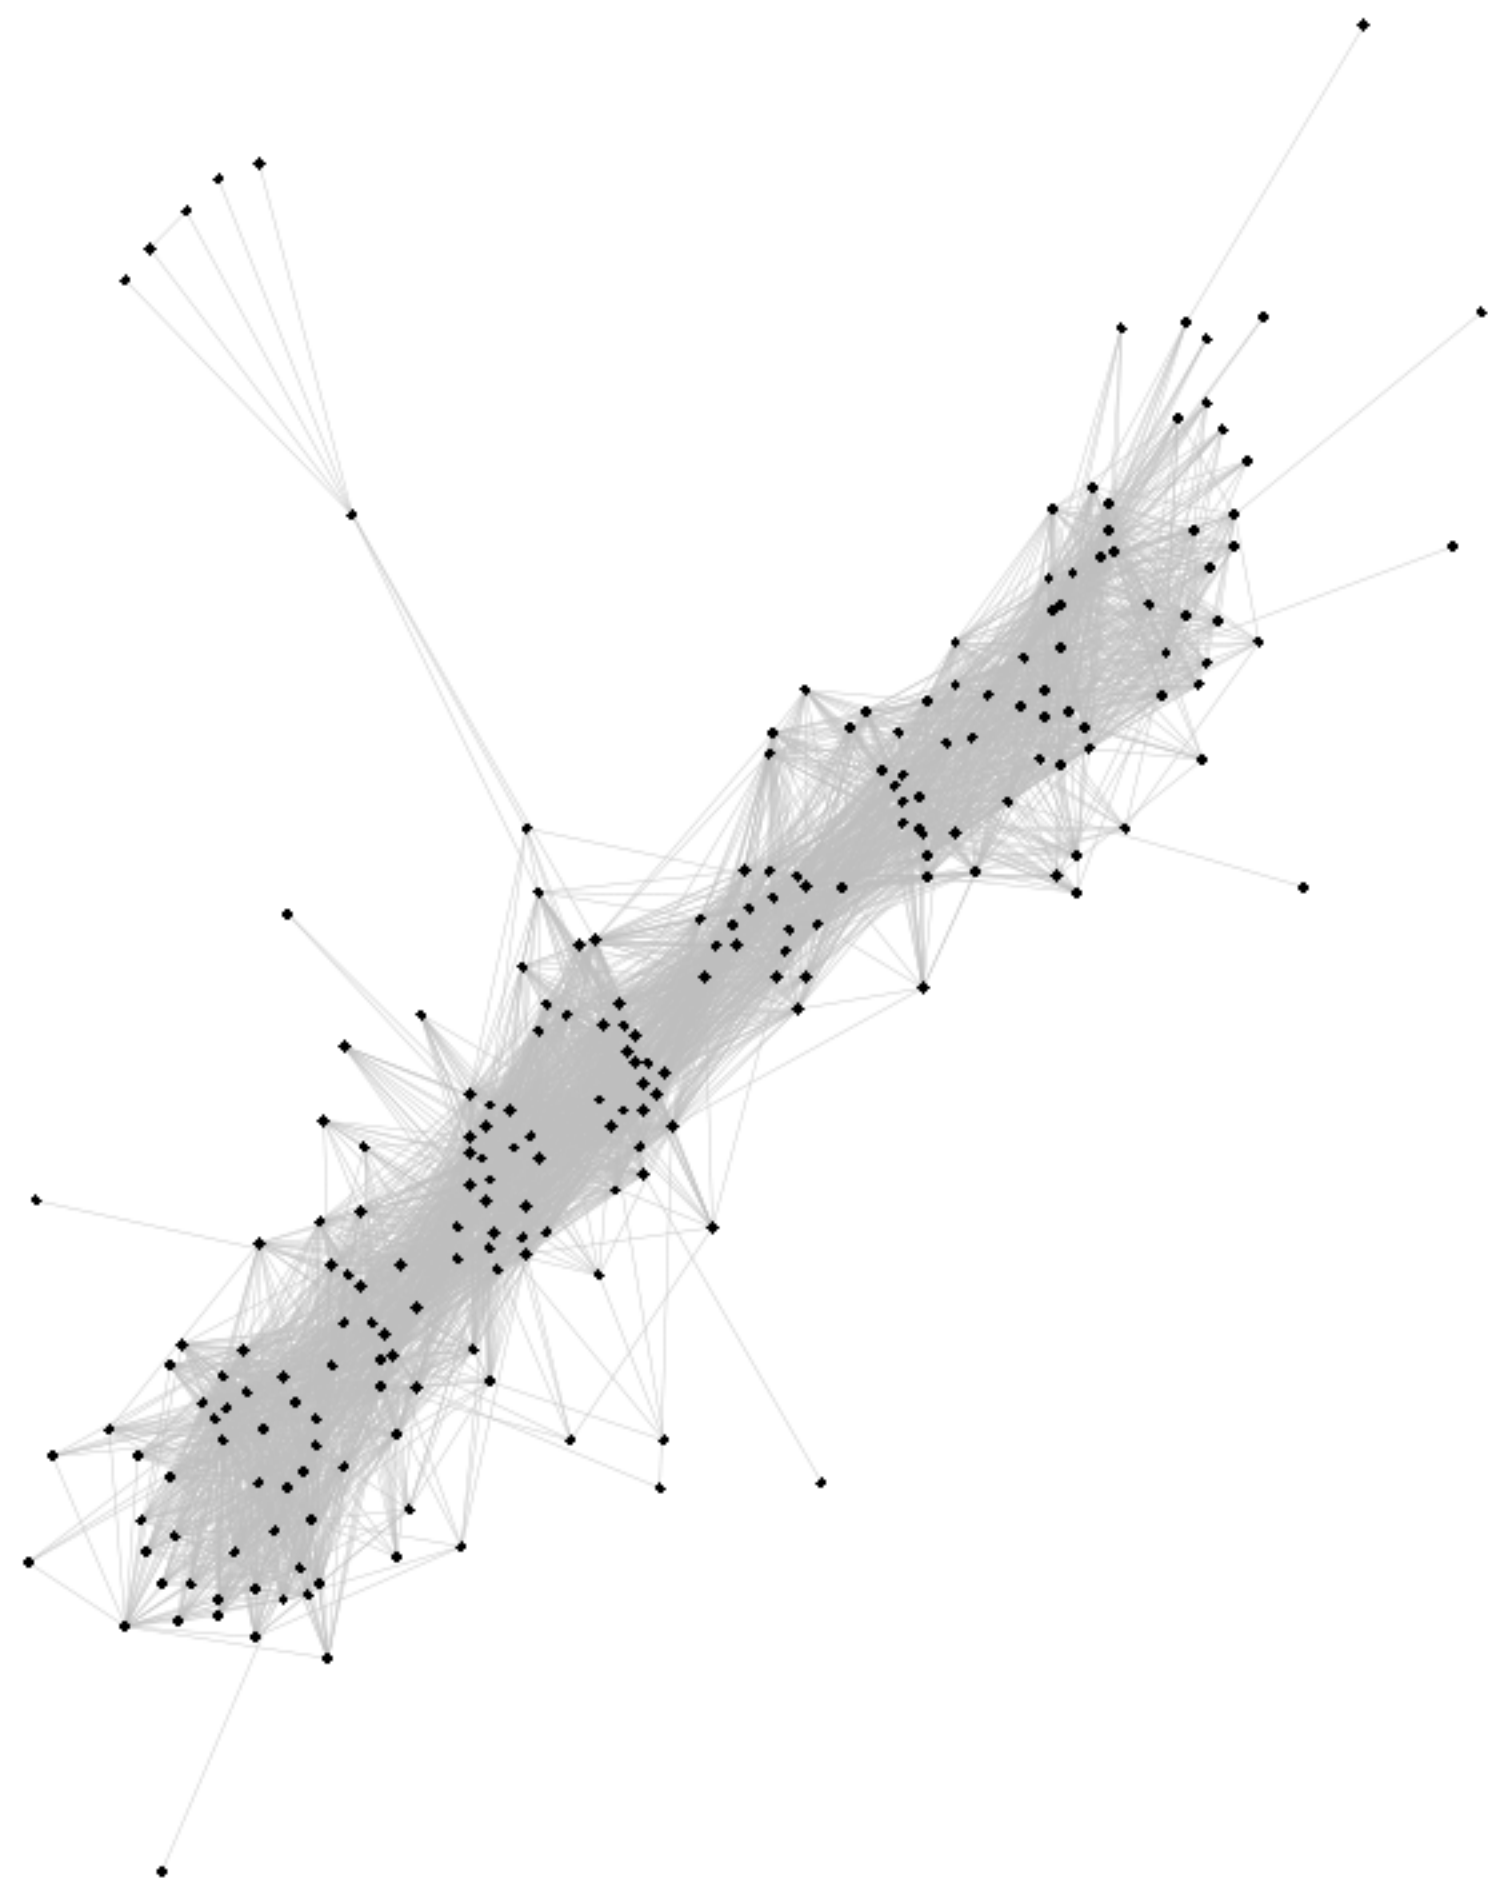

**CL182**

Number of reads: 224  
Number of pairs: 4227  
Density: 0.1692  
Diameter: NA  
Mean edge weigth: 159.37  
Max. degree: 70

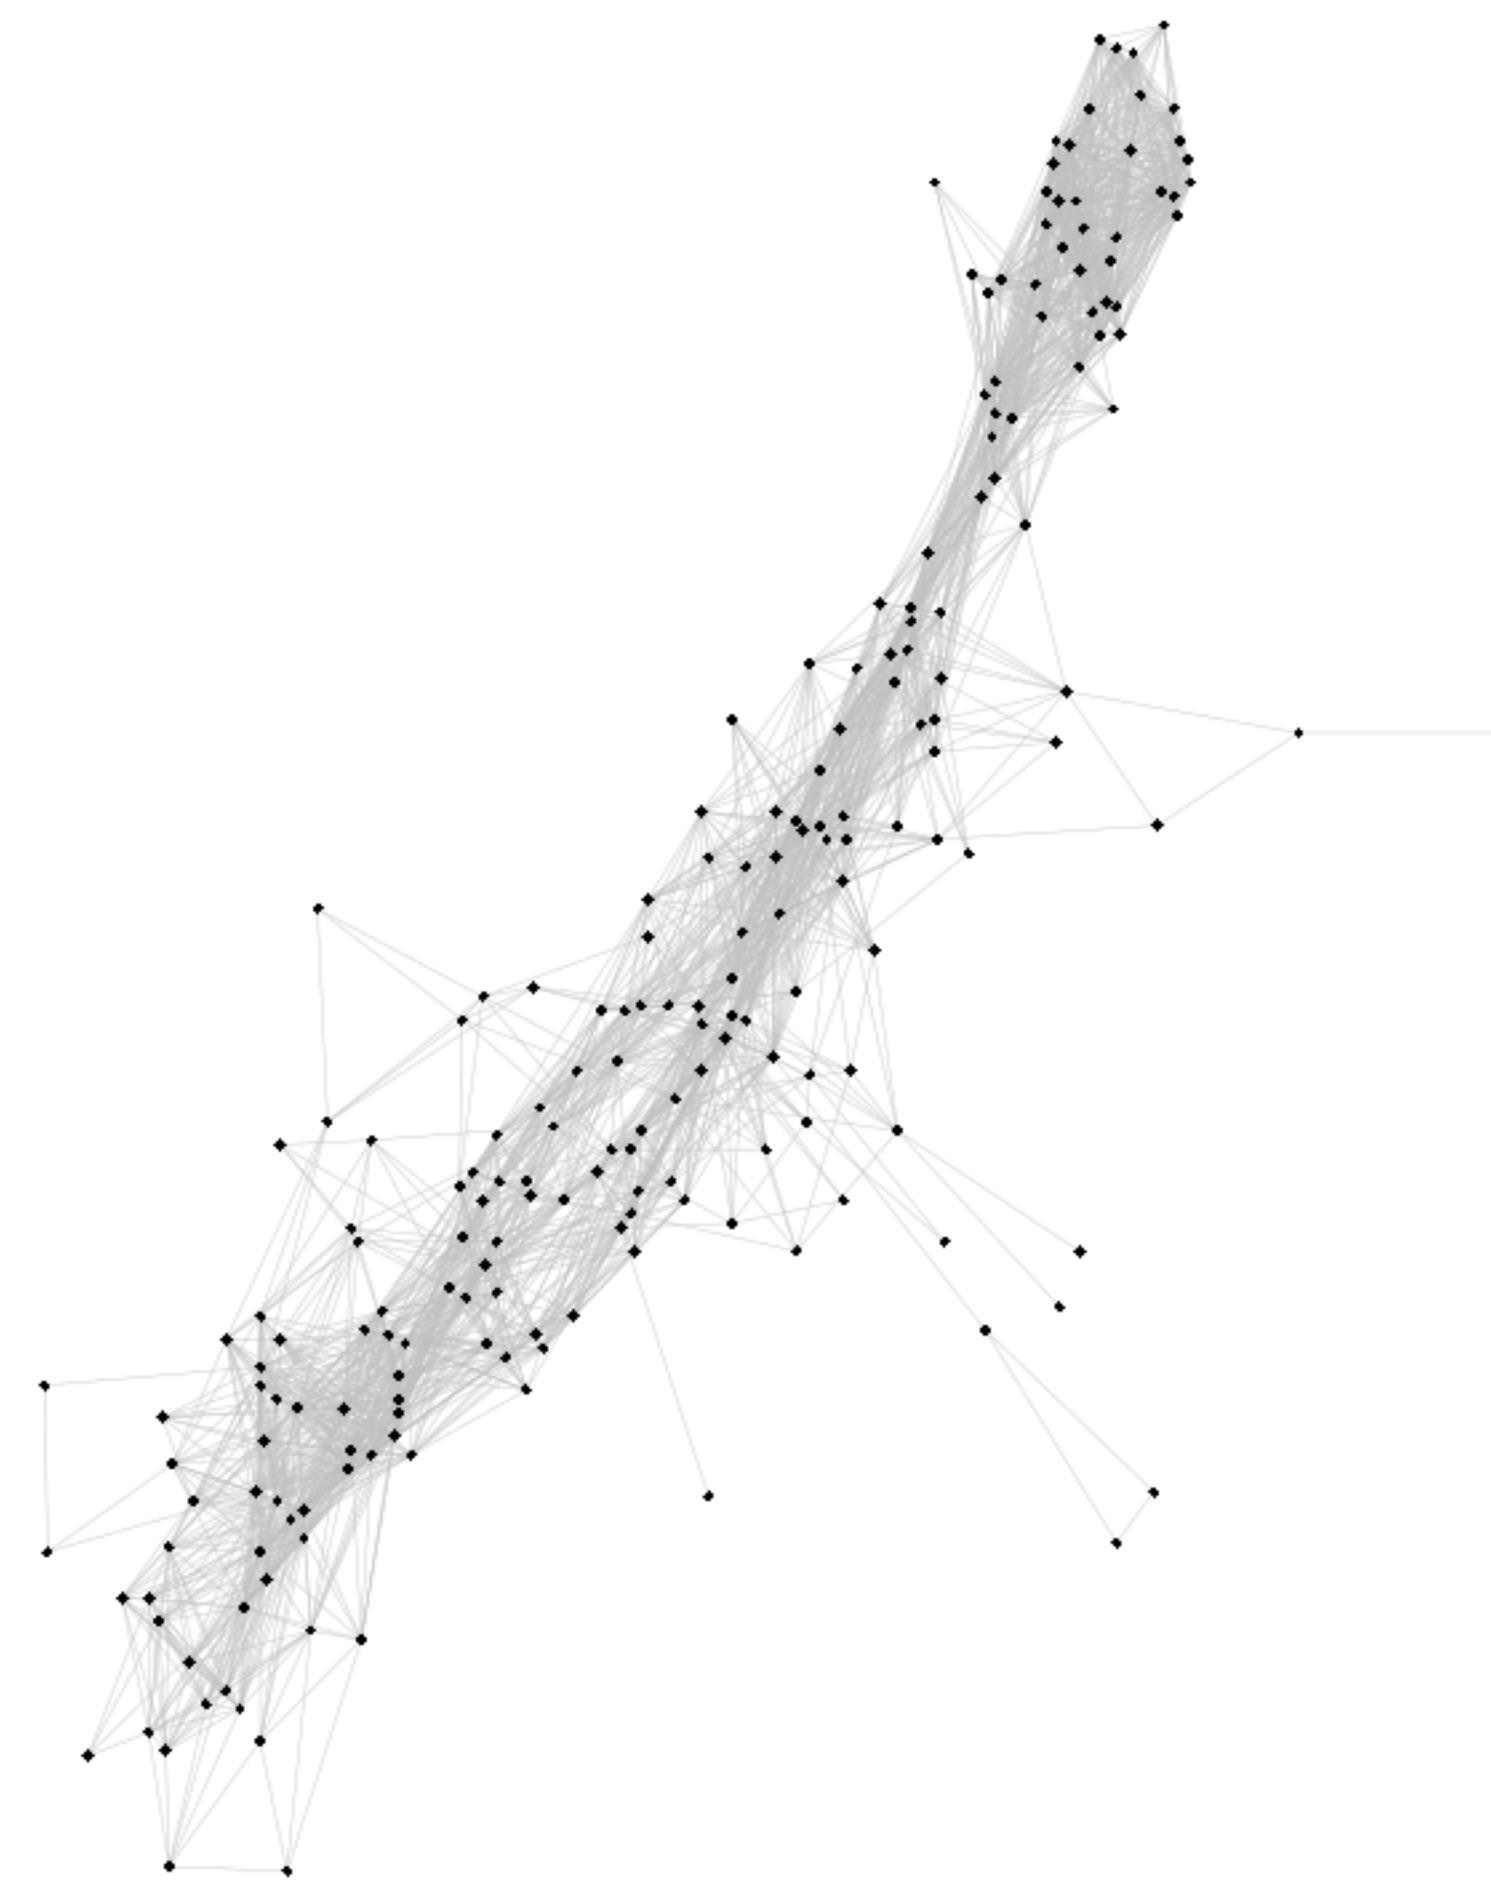

**CL183**

Number of reads: 211  
Number of pairs: 2410  
Density: 0.1088  
Diameter: NA  
Mean edge weigth: 157.69  
Max. degree: 47

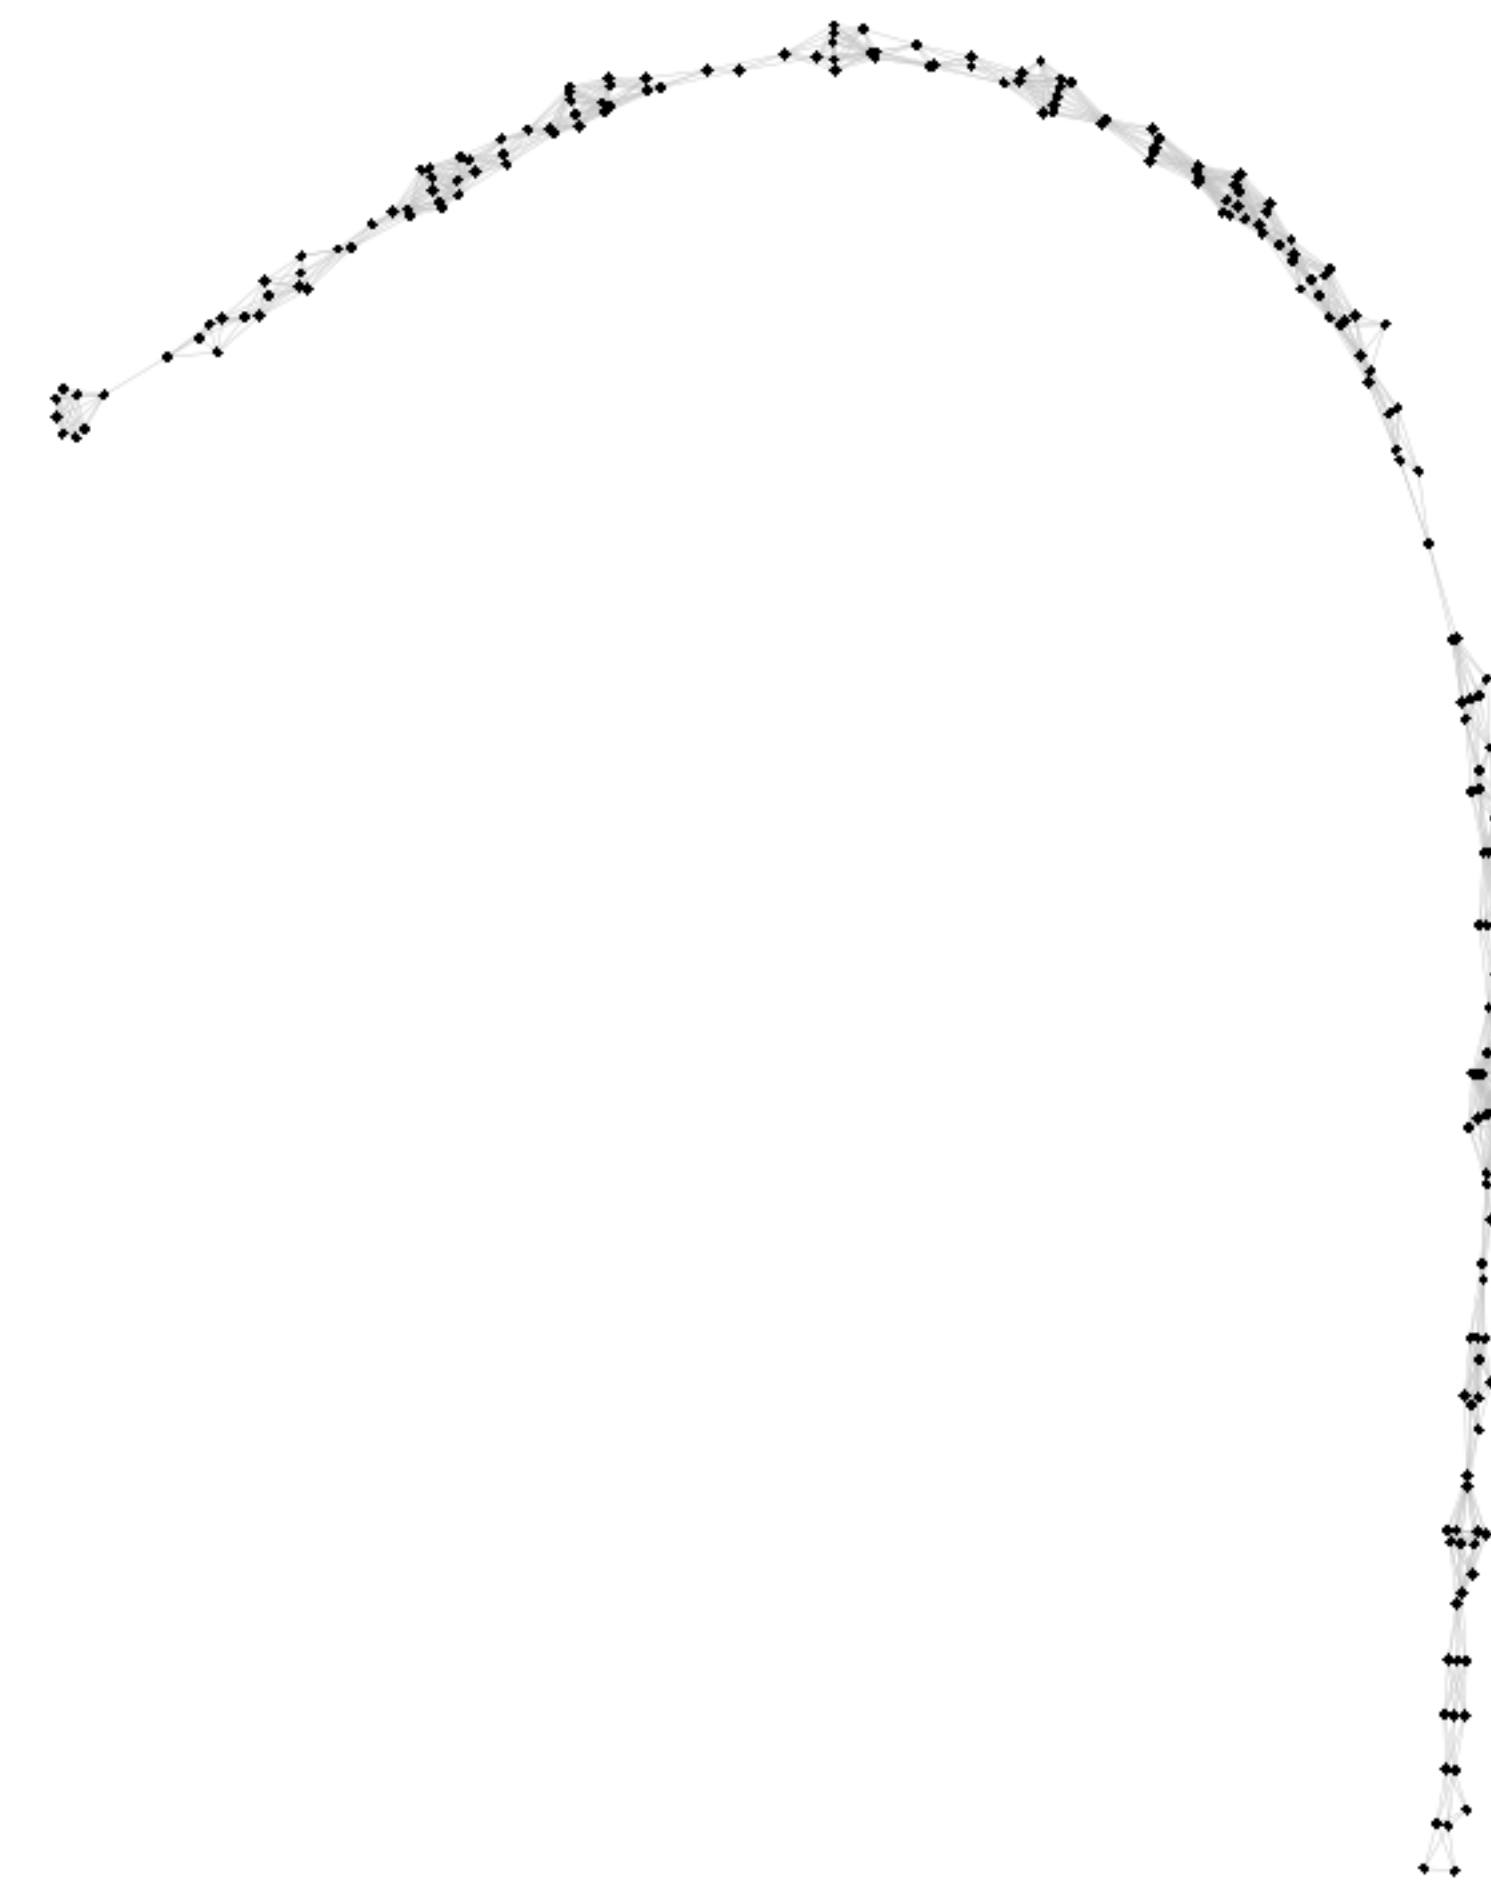

**CL184**

Number of reads: 211  
Number of pairs: 1101  
Density: 0.0497  
Diameter: NA  
Mean edge weigth: 214.92  
Max. degree: 18
